# Supplementary material for: Unveiling the “hidden quality” of the walnut pellicle: a precious source of bioactive lipids
Source: Front Plant Sci. 2024 Jun 18;15:1395543. doi: 10.3389/fpls.2024.1395543 (PMC11217525; doi:10.3389/fpls.2024.1395543)
Supplement: Supplementary Table 1 — Raw data of the untargeted metabolomic profile from the analytical Platform 1. [file Table_1.xlsx]

## Sheet: Run Information
Analysis
MiniX:	686371
Client Name:	Noah Feinberg/Abhaya Dandekar
Matrix:	English walnut seed coat
Sample number:	24
Platform:	Lipidomics
Client Requests:
Extraction notes:
Sample Preparation
Resuspension Volume:	110 uL
Resuspension Mix:	9:1 MeOH/Toluene + 50 ng/mL CUDA + Splash iSTDs
Wellplate Type:	54 vial tray
Positive mode
Instrument:	6546 QTOF
Mobile Phase:	A: 60:40 ACN/H2O + 10 mM Ammonium Formate + 0.1% Formic acid
	B: 90:10 IPA/ACN + 10 mM Ammonium Formate + 0.1% Formic acid
Column:	Acquity Premier BEH C18 1.7 um, 2.1 x 50 mm
Method:	D:\Projects\Core Lipidomics 5 Minute\Methods\CORE_posLipid_5min_5MS1_5MS2_DDA1_A2B2_vial_6546.m
Injection Volume:	1 ul
Start Date:	2022-10-24
Negative mode
Instrument:	6550 QTOF
Mobile Phase:	A: 60:40 ACN/H2O + 10 mM Ammonium Acetate
	B: 90:10 IPA/ACN + 10 mM Ammonium Acetate
Column:	Acquity Premier BEH C18 1.7 um, 2.1 x 50 mm
Method:	D:\MassHunter\Methods\CORE\Lipidomics 5 minute method\negative\vials\Verified_CORE_negLipids_acquityPremier_6550_5min_vials_1dda.m
Injection Volume:	5 ul
Start Date:	2022-10-25
Data processing
MS-DIAL Version:	4.92
Data Technician:	CS
Comments:	Data is not normalized

## Sheet: Data Platform 1
						Label	T1_N_L		T1_E_L		T1_S_L		T1_W_L		T2_N_L		T2_E_L		T2_S_L		T2_W_L		T3_N_L		T3_E_L		T3_S_L		T3_W_L		MtdBlank001	MtdBlank002	MtdBlank003	MtdBlank004	PoolQC001	PoolQC002	PoolQC003	PoolQC004
						Sample #	1		3		5		7		9		11		13		15		17		19		21		23		Blank	Blank	Blank	Blank	QC	QC	QC	QC
						Species	English Walnut (Juglans regia)		English Walnut (Juglans regia)		English Walnut (Juglans regia)		English Walnut (Juglans regia)		English Walnut (Juglans regia)		English Walnut (Juglans regia)		English Walnut (Juglans regia)		English Walnut (Juglans regia)		English Walnut (Juglans regia)		English Walnut (Juglans regia)		English Walnut (Juglans regia)		English Walnut (Juglans regia)						English Walnut (Juglans regia)	English Walnut (Juglans regia)	English Walnut (Juglans regia)	English Walnut (Juglans regia)
						Organ	Seed Coat/Pellicle		Seed Coat/Pellicle		Seed Coat/Pellicle		Seed Coat/Pellicle		Seed Coat/Pellicle		Seed Coat/Pellicle		Seed Coat/Pellicle		Seed Coat/Pellicle		Seed Coat/Pellicle		Seed Coat/Pellicle		Seed Coat/Pellicle		Seed Coat/Pellicle						Seed Coat/Pellicle	Seed Coat/Pellicle	Seed Coat/Pellicle	Seed Coat/Pellicle
						Treatment	Light Colored Seed Coat		Light Colored Seed Coat		Light Colored Seed Coat		Light Colored Seed Coat		Light Colored Seed Coat		Light Colored Seed Coat		Light Colored Seed Coat		Light Colored Seed Coat		Light Colored Seed Coat		Light Colored Seed Coat		Light Colored Seed Coat		Light Colored Seed Coat
						File ID	Dandekar018_MX686371_NegCSH_T1-N-L-001.d		Dandekar019_MX686371_NegCSH_T1-E-L-003.d		Dandekar017_MX686371_NegCSH_T1-S-L-005.d		Dandekar015_MX686371_NegCSH_T1-W-L-007.d		Dandekar010_MX686371_NegCSH_T2-N-L-009.d		Dandekar020_MX686371_NegCSH_T2-E-L-011.d		Dandekar013_MX686371_NegCSH_T2-S-L-013.d		Dandekar003_MX686371_NegCSH_T2-W-L-015.d		Dandekar023_MX686371_NegCSH_T3-N-L-017.d		Dandekar014_MX686371_NegCSH_T3-E-L-019.d		Dandekar007_MX686371_NegCSH_T3-S-L-021.d		Dandekar024_MX686371_NegCSH_T3-W-L-023.d		MtdBlank001_MX686371_NegCSH_preDandekar001.d	MtdBlank002_MX686371_NegCSH_NegtDandekar010.d	MtdBlank003_MX686371_NegCSH_NegtDandekar020_002.d	MtdBlank004_MX686371_NegCSH_NegtDandekar024.d	PoolQC001_MX686371_NegCSH_preDandekar001.d	PoolQC002_MX686371_NegCSH_NegtDandekar010.d	PoolQC003_MX686371_NegCSH_NegtDandekar020_002.d	PoolQC004_MX686371_NegCSH_NegtDandekar024.d
						File ID	Dandekar018_MX686371_posCSH_T1-N-L-001.d		Dandekar019_MX686371_posCSH_T1-E-L-003.d		Dandekar017_MX686371_posCSH_T1-S-L-005.d		Dandekar015_MX686371_posCSH_T1-W-L-007.d		Dandekar010_MX686371_posCSH_T2-N-L-009.d		Dandekar020_MX686371_posCSH_T2-E-L-011.d		Dandekar013_MX686371_posCSH_T2-S-L-013.d		Dandekar003_MX686371_posCSH_T2-W-L-015.d		Dandekar023_MX686371_posCSH_T3-N-L-017.d		Dandekar014_MX686371_posCSH_T3-E-L-019.d		Dandekar007_MX686371_posCSH_T3-S-L-021.d		Dandekar024_MX686371_posCSH_T3-W-L-023.d		MtdBlank001_MX686371_posCSH_preDandekar001.d	MtdBlank002_MX686371_posCSH_postDandekar010.d	MtdBlank003_MX686371_posCSH_postDandekar020.d	MtdBlank004_MX686371_posCSH_postDandekar024.d	PoolQC001_MX686371_posCSH_preDandekar001.d	PoolQC002_MX686371_posCSH_postDandekar010.d	PoolQC003_MX686371_posCSH_postDandekar020.d	PoolQC004_MX686371_posCSH_postDandekar024.d
Identifier	name	adduct	InChI Key	m/z	ESI mode	RT	Peak Height		Peak Height		Peak Height		Peak Height		Peak Height		Peak Height		Peak Height		Peak Height		Peak Height		Peak Height		Peak Height		Peak Height		Peak Height	Peak Height	Peak Height	Peak Height	Peak Height	Peak Height	Peak Height	Peak Height
4.14_699.60_4.14_694.65	CE 20:2	[M+Na]+ _[M+NH4]+		699.6024_694.6486	ESI pos	4.1425	1787		3553		2519		1185		2590		3746		3882		7993		5196		7084		3306		6174		491	618	521	558	3158	3322	3881	4032
1.97_534.49	Cer 34:2;3O|Cer 18:2;2O/16:0;O	[M+H-H2O]+	BGCIWBMYVKHZNX-UHFFFAOYSA-N	534.486	ESI pos	1.971	2320		2751		2769		1983		2332		2977		2784		4255		3489		3786		4446		4104		128	86	212	236	3464	3391	3067	3118
2.73_696.62	Cer 40:1;3O|Cer 18:1;3O/22:0	[M+CH3COO]-	NKJMWDBSQFISEX-UHFFFAOYSA-N	696.618	ESI neg	2.73	1225		2020		1784		1603		2287		2468		2176		2338		5669		5674		6204		4000		na	na	na	na	3393	3271	3378	3524
2.67_712.61_2.67_652.59	Cer 40:1;4O|Cer 18:1;3O/22:0;(2OH)	[M+CH3COO]-_[M-H]-	SUIXAFDIHPOBSV-UHFFFAOYSA-N	712.6122_652.5914	ESI neg	2.665	2491		2982		3750		4180		4657		6912		4114		6535		11774		19545		15248		9896		na	na	na	13	5029	4688	4645	6409
2.80_654.60	Cer 40:1;4O|Cer 23:1;3O/17:0;(2OH)	[M+H]+	HKMSUOWJVKXALZ-UHFFFAOYSA-N	654.603	ESI pos	2.797	2860		4203		3297		3571		4554		5956		4845		5488		9615		10220		9824		7819		1100	947	852	839	4039	4322	3976	4319
2.90_728.64	Cer 41:0;4O|Cer 18:0;3O/23:0;(2OH)	[M+CH3COO]-	LXCDJSOYWPJYDC-UHFFFAOYSA-N	728.641	ESI neg	2.902	1123		964		1363		766		1350		1302		1678		1441		2481		2580		3052		1412		na	na	15	17	1746	1463	1413	1504
2.86_710.63	Cer 41:1;3O|Cer 25:0;2O/16:1;(2OH)	[M+CH3COO]-	HTCBQNNYWCRTET-UHFFFAOYSA-N	710.633	ESI neg	2.856	1308		3123		3348		4171		2858		3465		2670		3602		8411		9040		8486		4867		na	na	na	na	3826	3833	3795	4108
2.78_666.61_2.78_726.63	Cer 41:1;4O|Cer 18:1;3O/23:0;(2OH)	[M-H]-_[M+CH3COO]-	TYVDMHBPUUFNQL-UHFFFAOYSA-N	666.6069_726.6284	ESI neg	2.7785	3451		5906		6827		9297		7710		11241		8765		9211		18549		20556		19411		12626		330	261	161	245	7368	8623	8031	8224
3.09_726.66	Cer 42:0;3O|Cer 18:0;3O/24:0	[M+CH3COO]-	ZESJDNWGTANZCC-UHFFFAOYSA-N	726.663	ESI neg	3.086	1623		2092		1907		1140		1743		1604		1518		2157		2621		3396		4078		2254		55	75	37	82	2966	2771	2754	2520
3.01_742.66	Cer 42:0;4O|Cer 18:0;3O/24:0;(2OH)	[M+CH3COO]-	ZFUXWVVVWGWGPQ-UHFFFAOYSA-N	742.658	ESI neg	3.011	1649		1466		2354		1652		2180		2295		2395		3422		3800		4502		4674		3178		13	54	33	55	2052	1911	2044	2799
2.98_724.65_2.98_664.63	Cer 42:1;3O|Cer 18:1;3O/24:0	[M+CH3COO]-_[M-H]-	WLPNRZCQBKEKIH-UHFFFAOYSA-N	724.6499_664.6281	ESI neg	2.983	3108		10798		9210		12546		9393		9808		6244		10731		21086		29764		21532		12914		na	16	na	30	9432	10662	9034	11314
2.90_680.63_2.90_740.65	Cer 42:1;4O|Cer 18:1;3O/24:0;(2OH)	[M-H]-_[M+CH3COO]-	BIVGPKIBTGZJJH-UHFFFAOYSA-N	680.6304_740.6525	ESI neg	2.8995	19196		24951		35482		22890		35015		50244		45045		35236		83228		70300		76676		32824		18	na	33	13	39648	39431	34100	39440
3.09_738.66	Cer 43:1;3O|Cer 18:1;3O/25:0	[M+CH3COO]-	VROFEAHIQIWNEJ-UHFFFAOYSA-N	738.664	ESI neg	3.087	1256		3562		2790		1795		3067		4050		2841		3154		7166		7130		9192		4075		na	na	na	na	3596	3396	3858	3072
3.01_754.67	Cer 43:1;4O|Cer 18:1;3O/25:0;(2OH)	[M+CH3COO]-	PBLGRAOOBKNRGK-UHFFFAOYSA-N	754.668	ESI neg	3.009	2684		3538		6393		5568		5901		9196		6996		9180		15524		14005		13666		8714		46	15	13	39	5747	4946	5250	7005
3.20_752.68	Cer 44:1;3O|Cer 18:1;3O/26:0	[M+CH3COO]-	BNTSRXHBAPIDEL-UHFFFAOYSA-N	752.679	ESI neg	3.198	549		1179		816		771		1444		1275		939		1728		2522		4117		3112		1989		13	na	na	na	1546	1319	1360	1345
3.12_768.67	Cer 44:1;4O|Cer 18:1;3O/26:0;(2OH)	[M+CH3COO]-	KRLRTEPRANCGSV-UHFFFAOYSA-N	768.675	ESI neg	3.119	834		1085		1528		1338		1520		2397		1446		2216		2202		3154		2633		1681		na	na	na	20	1615	1593	1528	1860
4.64_858.74	Cer 57:9;4O|Cer 16:1;2O/41:8;2O	[M+H-H2O]+	XWYSYZDCCBINGR-UHFFFAOYSA-N	858.74	ESI pos	4.645	133890		213156		177346		88178		92125		175073		164807		203720		285379		338373		221527		293344		342	1081	1263	1391	214613	237125	201398	223236
3.65_880.72	Cer 59:12;4O|Cer 18:3;2O/41:9;2O	[M+H-H2O]+	XTBDBNPRNHJNHY-UHFFFAOYSA-N	880.719	ESI pos	3.649	11625		11703		9363		na		18067		40854		46411		101793		74315		110082		70773		95551		187	284	147	248	48222	49545	45477	50883
2.12_570.47	Cer d34:2	[M+Cl]-	XXWRZIYYFPIQHE-XPAOSYCESA-N	570.468	ESI neg	2.122	150		228		343		219		508		516		450		294		712		1038		897		859		na	20	na	na	358	436	374	464
3.01_682.64	Cer d40:0	[M+CH3COO]-	SXPRAKSDHOEHIG-ZESVVUHVSA-N	682.637	ESI neg	3.011	1885		1504		2499		1855		2352		2380		2349		3492		3744		5227		4105		3474		39	70	23	66	2111	2110	2276	2819
3.01_694.64	Cer d41:1	[M+CH3COO]-	NAJHAHQNQCNWOP-PUYNVXOJSA-N	694.639	ESI neg	3.007	3019		4042		6809		6075		6217		9841		7002		9815		16134		17035		12741		9274		491	343	18	379	6038	5479	5334	7566
3.12_708.65	Cer d42:1	[M+CH3COO]-	ZJVVOYPTFQEGPH-AUTSUKAISA-N	708.653	ESI neg	3.117	1080		1195		1638		1359		1372		2284		1596		2175		2318		3157		2479		1875		na	na	na	12	1434	1559	1482	1717
2.84_617.51_2.84_612.56	DG 34:1	[M+Na]+_[M+NH4]+	YEJYLHKQOBOSCP-OZKTZCCCSA-N	617.5113_612.558	ESI pos	2.836	5776		5407		7806		11425		6225		4438		3127		2494		2456		2391		2875		1507		802	699	705	735	4586	4626	4590	5146
2.63_631.47_2.63_615.50	DG 34:2	[M+K]+_[M+Na]+	SVXWJFFKLMLOHO-YAIZGCQRSA-N	631.4698_615.4958	ESI pos	2.6295	33562		40232		55856		95327		43941		34357		14483		9001		13271		11515		12107		6695		578	601	653	821	27452	27960	25361	27003
2.63_610.54_2.45_613.48_2.45_608.53	DG 34:3	[M+NH4]+_[M+Na]+_[M+NH4]+	BHGPPCIWDXQOMA-IXDOJJAKSA-N	610.5399_613.4795_608.525	ESI pos	2.51167	34565		44380		66587		133050		49189		37015		15533		9855		15363		11740		12567		8124		1054	847	1192	814	30662	31037	26710	30255
2.88_659.50_2.88_643.53_2.88_638.57	DG 36:2	[M+K]+_[M+Na]+_[M+NH4]+	AFSHUZFNMVJNKX-LLWMBOQKSA-N	659.5025_643.5281_638.5724	ESI pos	2.87833	17837		21610		28014		54940		24501		18462		6964		7139		7746		7827		9895		6044		1525	1160	1448	1432	14921	15049	14914	15010
2.64_657.49_2.64_641.51_2.64_636.56	DG 36:3	[M+K]+_[M+Na]+_[M+NH4]+	BLZVZPYMHLXLHG-JOBMVARSSA-N	657.4864_641.5122_636.557	ESI pos	2.642	65348		70458		116807		206160		90618		62576		21095		18738		21414		16956		23278		10156		737	653	1052	770	46259	50429	43565	48535
2.44_655.47_2.44_639.50_2.44_634.54	DG 36:4 Isomer A	[M+K]+_[M+Na]+_[M+NH4]+	MQGBAQLIFKSMEM-ZHARMHCNSA-N	655.47_639.496_634.5408	ESI pos	2.44233	206983		265075		353284		776599		327860		242134		83991		50027		95508		87398		96364		30051		558	733	826	426	157627	177157	166542	173061
2.26_637.48	DG 36:5	[M+Na]+	ITGCIESKDJEEHN-UHFFFAOYSA-N	637.481	ESI pos	2.257	17597		23198		37651		79366		35561		29373		10832		4897		11911		8156		9864		3479		254	312	197	220	15247	18613	14781	16496
2.26_632.53	DG 36:5|DG 18:2_18:3	[M+NH4]+	PGXBELQFNRPKBC-UHFFFAOYSA-N	632.525	ESI pos	2.257	41915		60897		96320		215472		90004		74010		25953		10838		29520		20969		23997		8370		484	324	364	407	39780	45990	38853	43382
2.19_934.65	DGDG 34:2|DGDG 16:0_18:2	[M+NH4]+	QZXMUPATKGLZAP-UHFFFAOYSA-N	934.647	ESI pos	2.192	5971		10741		17601		17829		11862		20271		12684		27710		26642		27082		27623		25768		165	85	83	139	21634	23340	22673	23247
2.20_960.66	DGDG 36:3|DGDG 18:1_18:2	[M+NH4]+	KCWRXTZCUNBOLH-UHFFFAOYSA-N	960.661	ESI pos	2.199	3090		4692		9373		6925		4976		9695		5183		13601		11193		11522		12621		11245		117	na	na	143	10344	10350	8777	9824
1.79_767.53	DGGA 34:2|DGGA 16:0_18:2	[M-H]-	BUAACCTZRHRKAS-UHFFFAOYSA-N	767.533	ESI neg	1.788	3460		5534		6175		7406		6982		8026		6477		10434		15018		14405		15424		13336		na	na	na	22	8646	6744	9839	6757
2.18_812.59	DGGA 36:3|DGGA 18:1_18:2	[M+NH4]+	VBTJCNBNATWYNG-UHFFFAOYSA-N	812.589	ESI pos	2.183	2777		3943		4631		3000		3200		4858		3796		7443		7926		10659		9501		8288		197	27	68	131	6360	7261	6003	6697
0.74_253.22	FA 16:1 (palmitoleic acid)	[M-H]-	SECPZKHBENQXJG-FPLPWBNLSA-N	253.218	ESI neg	0.742	2158		1581		2737		3264		7128		2110		2258		3321		2738		3362		3761		2894		855	905	793	1131	2161	3603	2157	3741
1.19_269.25	FA 17:0 (margaric acid)	[M-H]-	KEMQGTRYUADPNZ-UHFFFAOYSA-N	269.25	ESI neg	1.188	10498		7739		12997		8302		13644		14594		11627		21753		18988		23698		20916		19370		2284	2081	2023	2535	12505	13342	11895	16224
0.89_267.24	FA 17:1	[M-H]-	QSBYPNXLFMSGKH-UHFFFAOYSA-N	267.238	ESI neg	0.893	682		654		1180		1133		1537		1094		1040		1682		1888		1754		1875		1654		256	297	283	299	999	1340	1085	1305
1.08_281.25	FA 18:1 (oleic acid)	[M-H]-	ZQPPMHVWECSIRJ-KTKRTIGZSA-N	281.25	ESI neg	1.076	48319		50354		121736		79396		70705		87816		60755		145590		84278		128461		133570		82872		8747	7465	8323	8811	68123	114520	64355	145125
0.81_279.23	FA 18:2 (linoleic acid)	[M-H]-	JBYXPOFIGCOSSB-XBLVEGMJSA-N	279.235	ESI neg	0.813	71299		120547		185097		233401		124991		225530		62024		95411		88426		174749		189712		58555		685	962	744	1055	113970	114661	107529	140149
0.62_277.22	FA 18:3 (linolenic acid)	[M-H]-	DTOSIQBPPRVQHS-PDBXOOCHSA-N	277.219	ESI neg	0.623	11429		23275		34554		39922		24523		37737		13033		9051		15664		19992		24622		7938		35	134	89	93	18007	17360	19228	22064
1.35_309.28	FA 20:1 (eicosenoic acid)	[M-H]-	BITHHVVYSMSWAG-KTKRTIGZSA-N	309.28	ESI neg	1.354	1650		1346		2402		2052		2396		2777		1749		3946		2086		3094		3837		1987		339	385	359	428	2053	2362	2009	2660
1.67_325.31	FA 21:0	[M-H]-	CKDDRHZIAZRDBW-UHFFFAOYSA-N	325.313	ESI neg	1.67	2744		2795		3765		2273		3459		4771		4061		5433		7339		8927		7524		7294		164	190	240	182	4712	4312	4310	4860
1.79_339.33	FA 22:0 (behenic acid)	[M-H]-	UKMSUNONTOPOIO-UHFFFAOYSA-N	339.329	ESI neg	1.794	7473		8148		7445		6936		8076		8643		8486		12603		13637		17655		15620		12844		882	837	778	1032	10613	9430	10570	11509
1.92_353.34	FA 23:0	[M-H]-	XEZVDURJDFGERA-UHFFFAOYSA-N	353.344	ESI neg	1.924	5972		8194		7084		4768		7777		8262		7250		11193		12771		15410		14964		13367		483	559	464	783	10094	9222	10027	10643
2.06_367.36	FA 24:0 (lignoceric acid)	[M-H]-	QZZGJDVWLFXDLK-UHFFFAOYSA-N	367.36	ESI neg	2.058	21554		25205		26682		19827		32720		21235		21279		32911		35566		43764		34712		31668		1814	2045	1674	2699	33796	32039	30806	40799
2.19_381.38	FA 25:0	[M-H]-	MWMPEAHGUXCSMY-UHFFFAOYSA-N	381.375	ESI neg	2.192	5850		8677		9543		8338		8893		6269		5517		8961		8199		12353		10891		8032		607	722	576	801	11075	11423	10590	14295
2.33_395.39	FA 26:0	[M-H]-	XMHIUKTWLZUKEX-UHFFFAOYSA-N	395.391	ESI neg	2.332	46521		67968		63101		80577		70314		46640		30339		63346		45639		73010		58767		54695		1285	1647	1074	1997	87068	85356	87511	92123
2.47_409.41	FA 27:0	[M-H]-	VXZBFBRLRNDJCS-UHFFFAOYSA-N	409.407	ESI neg	2.469	1761		1754		1967		1866		1865		1339		1213		2264		917		2449		2396		1689		168	202	193	242	3045	2604	2720	3208
2.60_423.42	FA 28:0 (montanic acid)	[M-H]-	UTOPWMOLSKOLTQ-UHFFFAOYSA-N	423.424	ESI neg	2.604	5373		5454		4703		8393		7252		4139		3025		7252		2005		10761		6323		4432		746	668	638	756	9297	9371	8904	12156
2.88_451.45	FA 30:0	[M-H]-	VHOCUJPBKOZGJD-UHFFFAOYSA-N	451.453	ESI neg	2.878	1187		1165		1103		2124		1120		903		671		1359		648		2043		1510		950		248	204	340	290	1496	1570	1584	2196
2.51_814.64	GlcCer d38:1	[M+CH3COO]-	DFELABABMXOKTD-IYFIADHGSA-N	814.643	ESI neg	2.508	1081		1491		1590		2339		1585		1772		1355		2630		2114		2551		2492		2369		na	na	na	na	2188	1793	2009	2085
2.74_842.67	GlcCer d40:1	[M+CH3COO]-	YIGARKIIFOHVPF-YAEABVQUSA-N	842.675	ESI neg	2.739	1973		2685		2869		2311		2332		3209		2801		4839		5041		4723		5187		4500		na	na	na	na	3866	3794	4388	4233
2.85_856.69	GlcCer d41:1	[M+CH3COO]-	SJGWLQDELUWRDA-MUYAOIFFSA-N	856.689	ESI neg	2.854	650		905		845		867		626		912		898		1356		1472		1531		1599		1498		na	15	na	13	1442	1322	1459	1132
2.97_870.70	GlcCer d42:1	[M+CH3COO]-	POQRWMRXUOPCLD-AAAFHMTMSA-N	870.704	ESI neg	2.969	372		660		521		642		451		498		410		785		916		971		934		721		na	na	na	na	740	644	581	761
1.97_714.55_1.97_696.54	HexCer 34:2;3O|HexCer 18:2;2O/16:0;O	[M+H]+_[M+H-H2O]+	HOMYIYLRRDTKAA-UHFFFAOYSA-N	714.5521_696.5393	ESI pos	1.9695	16915		24296		22921		20100		21507		27423		24789		37497		35100		38623		39690		35066		525	531	487	525	29499	32948	29507	32308
2.63_828.66	HexCer 41:1;4O|HexCer 18:1;3O/23:0;(2OH)	[M-H]-	GXXYAXHZBGPQTG-UHFFFAOYSA-N	828.657	ESI neg	2.628	881		1042		1230		956		1009		1542		1046		2242		1848		1932		1832		1941		na	na	na	na	1661	1583	1803	1483
2.88_844.69	HexCer 42:1;4O|HexCer 18:1;3O/24:0;(2OH)	[M+H]+	QZNIVVAKPLIDJX-UHFFFAOYSA-N	844.686	ESI pos	2.878	10689		13387		14192		12463		13604		15164		12733		20162		18650		22693		18177		18893		325	255	289	178	15865	16308	15794	16783
2.85_916.71	HexCer 43:1;4O|HexCer 18:1;3O/25:0;(2OH)	[M+CH3COO]-	JPDBHJZMCPAOTJ-UHFFFAOYSA-N	916.71	ESI neg	2.855	847		1059		1094		884		797		1066		1094		2154		1562		1835		1871		1559		na	na	na	na	1885	1655	1821	1247
0.67_496.34	LPC 16:0	[M+H]+	ASWBNKHCZGQVJV-HSZRJFAPSA-N	496.34	ESI pos	0.673	5842		6632		8878		15528		11213		9054		6509		7729		16073		17214		14427		13785		355	656	483	575	8949	10330	10050	8924
1.02_524.37	LPC 18:0	[M+H]+	IHNKQIMGVNPMTC-RUZDIDTESA-N	524.369	ESI pos	1.022	2125		3056		2537		5385		4534		3113		2105		3447		4825		5376		4603		4465		227	386	176	75	4050	4267	3658	4392
0.73_522.36	LPC 18:1	[M+H]+	YAMUFBLWGFFICM-PTGWMXDISA-N	522.356	ESI pos	0.731	1498		2238		2196		4064		2835		1783		1245		1952		3089		3690		2983		2691		96	214	109	265	3260	3088	3322	2853
0.54_520.34	LPC 18:2	[M+H]+	SPJFYYJXNPEZDW-FTJOPAKQSA-N	520.341	ESI pos	0.544	5882		8384		7437		19081		11301		8527		4848		5354		9806		9245		8563		7701		508	843	406	928	7588	8601	7007	8063
0.42_518.33	LPC 18:3	[M+H]+	WKQNRCYKYCKESD-YVHLTTHBSA-N	518.325	ESI pos	0.42	1022		1302		1154		2405		1679		1324		1149		633		1575		1459		1308		819		155	114	167	53	1441	1329	998	1013
1.33_552.40	LPC 20:0	[M+H]+	UATOAILWGVYRQS-HHHXNRCGSA-N	552.4	ESI pos	1.328	409		701		547		918		1156		745		632		908		857		991		845		1012		162	231	201	82	884	956	690	921
0.55_478.29	LPE 18:2	[M+H]+		478.292	ESI pos	0.55	713		941		1027		1837		1017		1000		525		629		1244		1148		1096		953		67	91	193	168	839	986	720	1118
1.97_738.51	LPE-N (FA)36:4|LPE-N (FA 20:3)16:1	[M-H]-	QQVWCALZWGRUSM-UHFFFAOYSA-N	738.512	ESI neg	1.971	2402		2930		3836		12188		4313		2608		1472		552		1648		944		1553		622		na	na	na	na	3619	2981	3031	2550
1.87_671.47	PA 34:2|PA 16:0_18:2	[M-H]-	YQMUIZXKIKXZHD-UHFFFAOYSA-N	671.468	ESI neg	1.87	6650		4848		13105		6941		5643		10850		7429		13885		11135		10080		12425		10917		na	20	na	13	6546	7246	6803	7792
1.97_685.48	PA 35:2|PA 17:0_18:2	[M-H]-	FAKFGVATVCJIPF-UHFFFAOYSA-N	685.482	ESI neg	1.974	739		956		1703		759		837		1602		908		2407		1698		2345		2066		1970		na	na	na	13	1044	1141	1129	1047
1.88_697.48	PA 36:3|PA 18:1_18:2	[M-H]-	MVSJLGUSXDKOAR-UHFFFAOYSA-N	697.484	ESI neg	1.882	1036		852		2799		1168		901		1751		1104		1999		1644		1169		1753		1617		na	na	na	na	1208	1335	1327	1315
1.73_695.47	PA 36:4|PA 18:2_18:2	[M-H]-	OBXRDFNCKFWKNY-UHFFFAOYSA-N	695.468	ESI neg	1.734	5179		5333		9366		5871		5696		9339		4455		10984		9517		7162		9444		8110		na	20	na	na	5489	5738	5909	6046
2.26_742.54	PC 31:0	[M+Na]+	NPGWXTIWUUFYAB-DIPNUNPCSA-N	742.539	ESI pos	2.263	2582		3910		4282		12724		6098		2718		1997		1341		1456		1799		1818		1062		177	99	318	174	3324	3785	3564	3247
2.38_734.57	PC 32:0	[M+H]+	KILNVBDSWZSGLL-KXQOOQHDSA-N	734.568	ESI pos	2.376	4271		9323		6406		12719		9730		3321		4169		1844		3147		3211		3022		9010		856	1040	823	797	5452	6341	4880	6224
2.27_746.57	PC 33:1	[M+H]+	OFRWLQSOUIZELQ-VEAYGOGPSA-N	746.566	ESI pos	2.266	1138		1817		1165		1254		1409		940		826		1565		1152		1602		1226		1477		710	520	846	564	1848	2305	1935	2013
2.07_744.55	PC 33:2	[M+H]+	SBNDHGBVMZMSNL-UESLNCBNSA-N	744.553	ESI pos	2.071	1175		1908		1648		2279		1972		1513		965		1106		2802		2191		1825		2461		452	247	70	304	2507	2947	3053	2903
2.63_762.60	PC 34:0	[M+H]+	PZNPLUBHRSSFHT-RRHRGVEJSA-N	762.603	ESI pos	2.632	1232		2144		1142		5259		2164		1591		1770		832		499		814		914		2669		551	431	260	490	2821	2210	1821	1918
2.39_760.58	PC 34:1	[M+H]+	WTJKGGKOPKCXLL-VYOBOKEXSA-N	760.585	ESI pos	2.394	19204		25350		29042		56120		32839		18008		7332		4929		7731		8435		9113		15952		1072	1091	1309	1571	28837	27525	24994	26714
2.19_758.57_2.19_780.55	PC 34:2	[M+H]+_[M+Na]+	JLPULHDHAOZNQI-ZTIMHPMXSA-N	758.5711_780.5516	ESI pos	2.193	211905		338941		358804		1194981		377554		274880		143267		63222		181802		129483		134380		94199		1034	906	1045	796	274769	302541	290275	306085
1.93_814.56	PC 34:3	[M+CH3COO]-	CNNSEHUKQJCGTE-UPPWDXJYSA-N	814.563	ESI neg	1.93	466		761		669		1555		1142		613		370		136		367		212		313		172		na	na	19	na	581	462	510	492
2.02_756.55_2.01_778.54	PC 34:3 Isomer B	[M+H]+_[M+Na]+	VKVSSDKCKXJFIM-AFYHZPHLSA-N	756.5543_778.5357	ESI pos	2.0155	19581		25272		30046		99146		45489		21420		14252		4878		16988		7842		9046		5989		134	261	313	309	18715	19084	18278	20155
2.52_774.60	PC 35:1	[M+H]+	MFHIZGSSDZJFKD-IYEJTHTFSA-N	774.6	ESI pos	2.521	1193		1840		1859		1346		1993		1386		1218		1368		1428		1496		1357		1965		501	414	323	256	3462	3420	3546	2858
2.32_772.59	PC 35:2 Isomer B	[M+H]+	MJWAVUYQCBFFHQ-WESJWMGVSA-N	772.586	ESI pos	2.319	3588		7986		5718		7817		7114		4928		3143		4205		9316		9458		7039		7226		229	295	331	408	9814	9638	9463	10052
2.44_786.60_2.45_808.58	PC 36:2	[M+H]+_[M+Na]+	SNKAWJBJQDLSFF-NVKMUCNASA-N	786.6017_808.5806	ESI pos	2.4435	43891		76139		69977		227230		94188		53979		27910		11728		28555		19496		22774		13523		858	837	928	1049	47262	52310	49690	50813
2.20_784.59	PC 36:3 Isomer A	[M+H]+	BXRLDROZWDUSGM-ZRYFCQOPSA-N	784.586	ESI pos	2.202	59047		70696		94076		231455		104018		59296		18320		13815		30921		21826		27462		17980		359	389	331	209	78024	80959	76615	83523
2.02_782.57_2.02_804.55	PC 36:4 Isomer A	[M+H]+_[M+Na]+	NKQPOVROGSWLTO-NVPMBMBWSA-N	782.5708_804.5521	ESI pos	2.015	100126		117392		152020		761906		208407		109285		62257		20233		68941		38507		48411		20316		494	996	984	628	101429	105406	97890	107063
1.78_838.56	PC 36:5 Isomer A	[M+CH3COO]-	DYDDZDMJSQYFGN-OIVUZXIWSA-N	838.563	ESI neg	1.777	1136		1051		1533		4418		2267		1225		798		241		761		325		492		129		na	na	na	na	1172	793	1122	862
1.85_780.55_1.85_802.53	PC 36:5 Isomer A	[M+H]+_[M+Na]+	SUZYROYNFNQALJ-MHEIZRSESA-N	780.5533_802.5347	ESI pos	1.8515	23037		26303		32127		101875		46831		26642		17564		5732		16977		8128		9833		5939		193	218	624	654	21617	21576	20514	19497
2.69_814.64	PC 38:2	[M+H]+	KXXLFCAPKGRXBT-FMJYHZMHSA-N	814.635	ESI pos	2.691	1902		2374		1314		4923		3483		2079		1380		827		1521		1064		1168		1184		102	196	200	171	2155	1928	2249	2186
2.44_812.62	PC 38:3	[M+H]+	KNNHXKQRTYEWCA-HYYWERRFSA-N	812.616	ESI pos	2.444	3096		3562		3399		10044		4517		2828		1769		1676		1565		1378		1869		977		188	178	257	98	2833	3449	3276	3070
2.20_808.58	PC 38:5 Isomer B	[M+H]+	YLWBKBDNHWQEFU-YJXJLLHLSA-N	808.583	ESI pos	2.204	1299		1136		1672		1716		1208		1245		1612		1142		1632		1633		1693		2327		530	529	400	370	1106	2178	1907	1298
2.20_806.58	PC 38:6 Isomer C	[M+H]+	PLZBTDKJYHXIEW-DZUXOTHRSA-N	806.577	ESI pos	2.2	9218		11985		10647		13543		10125		11879		8171		10574		11576		13470		11509		13017		2137	2676	2409	2979	9473	12665	12582	13969
2.73_882.66	PC P-40:3 or PC O-40:4	[M+CH3COO]-	RDNHPNJCALITSY-MBZSPAKGSA-N	882.657	ESI neg	2.728	426		678		761		611		583		689		556		1092		1084		865		1043		1068		na	na	na	13	913	841	976	799
2.33_716.53	PE 34:1	[M-H]-	FHQVHHIBKUMWTI-OTMQOFQLSA-N	716.525	ESI neg	2.334	277		324		571		2375		704		259		75		71		74		110		177		113		13	na	na	na	433	391	389	349
2.14_714.51	PE 34:2	[M-H]-	HBZNVZIRJWODIB-NHCUFCNUSA-N	714.511	ESI neg	2.14	4225		5687		6970		20671		6552		4219		2345		901		2520		1375		2533		999		na	22	na	na	5069	4845	4819	5118
2.38_742.54	PE 36:2	[M-H]-	MWRBNPKJOOWZPW-CLFAGFIQSA-N	742.54	ESI neg	2.375	614		936		585		3040		1206		675		337		245		439		235		497		227		na	na	na	na	779	743	714	780
2.15_740.53	PE 36:3	[M-H]-	DOILLFCKSSPXMF-ZKZIFNJMSA-N	740.525	ESI neg	2.153	565		674		1013		2484		970		476		226		143		260		184		340		122		na	na	na	na	758	708	773	714
1.78_723.50	PEtOH 36:4|PEtOH 18:2_18:2	[M-H]-	XYSXTPSWFGGRMW-UHFFFAOYSA-N	723.498	ESI neg	1.776	461		207		871		1165		81		31		na		13		18		13		25		17		24	na	na	na	178	159	186	178
1.91_835.54	PI 34:1	[M-H]-	PDLAMJKMOKWLAJ-AGORXRROSA-N	835.539	ESI neg	1.914	814		847		1898		5932		1413		725		336		290		66		189		489		27		na	na	na	na	832	710	834	711
1.97_857.52	PI 34:2	[M+Na]+	YHPPEKFMAUATQU-UHFFFAOYSA-N	857.515	ESI pos	1.968	3567		4031		4524		11874		5131		3463		2167		1551		2045		1064		2575		1462		57	168	65	101	3622	3593	2781	3221
1.76_833.52	PI 34:2	[M-H]-	ZPUUVEHXYAPJAQ-KOHXHNRGSA-N	833.523	ESI neg	1.759	17613		20639		20718		64590		23089		15911		7216		4638		7260		4626		9053		2920		13	52	18	14	14270	10558	14125	13318
1.63_831.51	PI 34:3|PI 16:0_18:3	[M-H]-	UHAJRYVOXHROHT-UHFFFAOYSA-N	831.506	ESI neg	1.633	3415		3132		5098		15831		4135		3097		1575		547		1676		822		2173		500		na	na	na	na	2870	2164	2377	2943
2.11_863.57	PI 36:1	[M-H]-	YOBFISPJJWPPTK-JUCSSFOXSA-N	863.569	ESI neg	2.114	212		270		390		1351		441		192		75		60		80		35		81		26		na	na	13	na	302	231	230	283
1.96_861.55	PI 36:2	[M-H]-	KZVRAFHIKMDULK-PDPKURFXSA-N	861.553	ESI neg	1.956	2932		5152		4087		17305		6579		3469		1633		1034		1427		845		1506		593		na	na	na	na	3618	2805	3633	3082
1.81_859.54	PI 36:3	[M-H]-	UPMVFTFJRCVMKL-PVJQQWEWSA-N	859.536	ESI neg	1.812	965		1752		1615		5564		2211		1215		542		274		388		284		687		84		na	na	na	na	891	861	1062	940
1.64_857.52	PI 36:4	[M-H]-	WPXXYOUAQYYXER-BFRKKRKTSA-N	857.521	ESI neg	1.636	1449		1500		1941		7339		2029		1323		759		595		738		574		1121		304		na	na	na	na	1421	1141	1255	1407
1.65_647.51	SM d30:1	[M+H]+	HZCLJRFPXMKWHR-FEBLJDHQSA-N	647.507	ESI pos	1.651	1592		2596		2993		3401		3017		3183		1895		938		2638		1360		1651		541		206	234	261	196	1552	1768	1601	1805
3.42_397.38	ST 29:1;O	[M+H-H2O]+	KZJWDPNRJALLNS-UHFFFAOYSA-N	397.383	ESI pos	3.42	7898		8766		12291		7275		10318		12823		10640		20057		18490		23770		16913		20048		193	132	89	118	10864	12308	10627	11632
3.43_736.64	TG 42:2	[M+NH4]+	IDWYMMYRNPSLDA-NNBKTNTFSA-N	736.644	ESI pos	3.432	2913		2851		4023		2275		2934		4813		3914		6932		5912		8575		5789		7453		541	571	601	376	3031	3532	2963	3329
2.83_790.65	TG 45:4;1O|TG 10:0_18:1_17:3;1O	[M+NH4]+	LAWSRCVMDYXSCX-UHFFFAOYSA-N	790.655	ESI pos	2.831	19209		15798		14194		30493		15299		9776		9010		11954		6117		9370		7612		5860		1095	811	1507	786	12645	17506	13320	18520
2.64_788.64	TG 45:5;1O|TG 10:0_18:2_17:3;1O	[M+NH4]+	DNNSMDCFHPYUJX-UHFFFAOYSA-N	788.639	ESI pos	2.637	60607		60539		47731		104708		51346		39974		25934		24335		18000		31334		20700		16659		1374	1383	1655	1720	40990	63267	42484	59957
2.95_804.67	TG 46:4;1O|TG 16:0_13:1_17:3;1O	[M+NH4]+	YEMMUEPYJAOAQW-UHFFFAOYSA-N	804.671	ESI pos	2.952	6931		6521		5343		9680		4819		4345		3756		3144		3312		3497		2635		1960		516	308	635	328	4301	7745	4964	7112
3.91_820.74	TG 48:2	[M+NH4]+	RUOVJPPUXXFZPC-YZEIBMOJSA-N	820.74	ESI pos	3.912	7375		6608		8550		12830		11183		5771		5865		4064		4106		6915		4473		3105		1889	1877	2373	1895	6089	6445	5527	7040
3.58_821.66_3.59_816.71	TG 48:4 Isomer A	[M+Na]+_[M+NH4]+	GRAMQDDTGXQCSO-ZJPFCMILSA-N	821.6621_816.707	ESI pos	3.5885	3186		4092		3281		7034		3732		3165		2199		2117		3195		2810		2311		1713		338	376	619	531	2166	3156	3067	2649
3.43_814.69	TG 48:5	[M+NH4]+		814.689	ESI pos	3.434	1154		1248		1371		2851		1662		922		1020		429		933		739		817		583		109	99	102	313	1356	1383	987	1397
2.97_830.69	TG 48:5;1O|TG 13:1_18:2_17:2;1O	[M+NH4]+	JJKLSOCSLCBNDV-UHFFFAOYSA-N	830.688	ESI pos	2.966	7772		8248		6166		14824		6444		4854		4606		3523		3011		3747		3994		2522		335	434	341	281	5311	8162	5712	7890
2.78_828.67	TG 48:6;1O|TG 13:1_18:2_17:3;1O	[M+NH4]+	ZJXUIBCREUAVJU-UHFFFAOYSA-N	828.671	ESI pos	2.782	17742		15999		12688		24193		12444		10743		8759		5937		6109		8367		5982		3754		591	563	601	652	11057	15835	11558	16671
2.62_826.65	TG 48:7;1O|TG 13:1_18:2_17:4;1O	[M+NH4]+	IAIMCCYJZMPABZ-UHFFFAOYSA-N	826.655	ESI pos	2.618	8179		8260		7665		16601		7331		4997		5963		2663		3491		3119		3240		2009		100	246	480	358	5248	7217	5574	8041
3.88_832.74	TG 49:3	[M+NH4]+	DIGMYZZFQSIQBD-PNLKURBTSA-N	832.738	ESI pos	3.882	5106		6592		6878		11495		8885		4838		4071		1972		3099		2383		2406		1941		1145	816	1134	784	4332	5215	3877	4545
4.35_852.80	TG 50:0	[M+NH4]+	MARPCPMDFOPPJX-UHFFFAOYSA-N	852.802	ESI pos	4.352	6555		7083		10966		17586		9040		6689		3671		3432		2966		4539		3991		2831		3514	2060	3535	2573	5307	6140	4460	6766
4.21_871.71_4.20_855.74	TG 50:1	[M+K]+_[M+Na]+	YHMDGPZOSGBQRH-YYSBDVFPSA-N	871.7128_855.7408	ESI pos	4.2055	10986		10150		13191		9272		11008		9337		9182		5844		6234		5081		5325		4010		1277	1159	1565	1163	8749	10392	9235	9270
4.07_853.73_4.08_848.77	TG 50:2	[M+Na]+_[M+NH4]+	QEZWFCZNHWUARW-XQCAQTCHSA-N	853.7255_848.7724	ESI pos	4.074	481901		511796		645350		696144		556944		516153		367062		164047		297593		189515		227726		112152		3880	5643	6080	3656	421557	440331	396021	428607
3.92_851.71	TG 50:3 Isomer A	[M+Na]+	UFHNZOACKFBCOM-YXKNDSBASA-N	851.708	ESI pos	3.918	1961		2346		2992		2293		3578		2009		2245		1561		1741		2288		1729		1963		148	270	186	183	2413	2925	3421	2236
3.95_851.71_3.95_846.76	TG 50:3 Isomer B	[M+Na]+_[M+NH4]+	UFHNZOACKFBCOM-YXKNDSBASA-N	851.7112_846.7567	ESI pos	3.952	78796		84877		118364		115016		98814		85946		77303		35104		64857		36046		45979		24974		2277	1529	2225	1677	75911	78640	74105	74373
3.75_865.67_3.75_849.69_3.76_844.74	TG 50:4	[M+K]+_[M+Na]+_[M+NH4]+	PVMBAGXWHHZKFP-JMPJWMFJSA-N	865.6683_849.6948_844.7407	ESI pos	3.756	68003		62215		75380		136379		97374		61818		41011		18798		31372		24547		26752		13374		584	808	588	960	50169	55687	53132	62717
3.62_863.66_3.62_847.68	TG 50:5	[M+K]+_[M+Na]+	AFTBPUXZTDLRSP-UDQIKIEDSA-N	863.6567_847.6788	ESI pos	3.615	4333		4709		5793		7910		8411		4562		2984		1767		2294		1670		1924		1677		246	115	96	449	4328	3994	3024	3559
3.49_840.71	TG 50:6	[M+NH4]+	YVQKDEFVOZTZOA-PVNINVEQSA-N	840.709	ESI pos	3.486	12023		16195		14710		30002		26995		12230		7612		3168		5841		3420		3260		1720		27	398	289	258	8335	9864	8799	9119
4.28_864.80	TG 51:1	[M+NH4]+	OZAXLAGNPZMZAD-BOEMPQCLSA-N	864.801	ESI pos	4.278	4441		5334		7129		12748		7939		4076		2604		2433		2867		3489		3522		2061		1783	1234	1688	1261	4011	5278	4236	4737
4.15_867.74_4.15_862.79	TG 51:2	[M+Na]+_[M+NH4]+	NSNSZGBCOIKUBU-SZOKBDNISA-N	867.7426_862.7863	ESI pos	4.1495	22219		24346		33040		58518		40839		23921		15352		8921		11094		11349		11300		8324		2580	2666	2943	2466	17494	21814	17956	21237
4.01_865.73_4.00_860.77	TG 51:3	[M+Na]+_[M+NH4]+	ISSGPXMQOMAFMJ-DMGKHJLRSA-N	865.7273_860.772	ESI pos	4.0055	30952		32758		45112		75706		54134		29989		16794		8063		10839		9804		14260		5296		1613	1065	1388	1124	22932	26819	23577	26594
3.87_863.71_3.86_858.76	TG 51:4	[M+Na]+_[M+NH4]+	IIRQXNVLAXQEKB-KBEZCZBDSA-N	863.7127_858.7558	ESI pos	3.8655	61155		72689		89095		147553		99633		66885		38619		15016		25075		19205		26440		10280		712	262	627	539	48090	55653	48456	53852
3.73_861.69_3.72_856.74	TG 51:5	[M+Na]+_[M+NH4]+	DYYKLAQWCNBXRJ-UNZGPCCPSA-N	861.6922_856.7414	ESI pos	3.725	45987		59454		71577		149626		95054		53019		35150		10192		19261		11828		16275		6345		475	458	437	477	37144	40133	34754	40791
3.58_854.72	TG 51:6|TG 15:1_18:2_18:3	[M+NH4]+	UHOYSFKFVXYJBU-UHFFFAOYSA-N	854.723	ESI pos	3.582	14184		23598		26016		54206		38045		19612		13713		3416		6759		3362		5312		2190		205	281	303	357	12089	13522	12467	12943
4.34_883.77_4.35_878.82	TG 52:1	[M+Na]+_[M+NH4]+	NPCZZYKITFKRQZ-RFBIWTDZSA-N	883.7748_878.8193	ESI pos	4.3455	188353		199177		373639		740047		286322		139559		56465		42074		43955		24084		53567		18418		2838	2863	2931	2549	115475	133382	110819	139828
4.09_883.78	TG 52:1|TG 8:0_22:0_22:1	[M+Na]+	NKAJUMHCINDCGW-UHFFFAOYSA-N	883.776	ESI pos	4.088	44818		50478		57933		81854		56246		44229		21013		14429		19745		14425		22812		8028		557	370	136	346	39061	39088	35534	36849
4.21_897.73_4.21_881.76_4.21_876.81	TG 52:2	[M+K]+_[M+Na]+_[M+NH4]+	TXMWKTABZBAJCW-QLHBUVOUSA-N	897.7321_881.758_876.8072	ESI pos	4.212	2284869		2370965		3512072		5244403		3412786		1754077		731126		494758		548821		277950		580821		183290		3858	7167	5613	5009	1626657	1793252	1542862	1732072
4.07_895.72_4.07_879.74_4.08_874.79	TG 52:3	[M+K]+_[M+Na]+_[M+NH4]+	DQXQIWIQYYEGLG-MMWLGPPDSA-N	895.7165_879.7421_874.7893	ESI pos	4.072	5849653		5915296		5873243		5961271		6023733		5554095		3362835		2299110		2666035		1788559		2855536		973960		5169	9150	8786	6459	5205568	5384028	5037798	5259106
3.94_893.70_3.94_877.73_3.94_872.77	TG 52:4	[M+K]+_[M+Na]+_[M+NH4]+	WHSWXEYWNPTUPW-HNJDVRDNSA-N	893.6998_877.7277_872.775	ESI pos	3.942	5926682		5948610		5981686		5896961		6007727		5998491		5998472		4778306		6051015		5724613		6089930		3289398		8156	13756	16718	9409	5931199	5926911	6004837	5904573
3.51_888.77	TG 52:4;1O|TG 16:1_18:1_18:2;1O	[M+NH4]+	NCUVHOLDZAPUMH-UHFFFAOYSA-N	888.766	ESI pos	3.514	122373		134438		170304		167639		138540		120314		80478		44239		84426		66112		85316		20236		307	503	459	505	102722	117531	99068	118081
2.96_904.76	TG 52:4;2O|TG 18:2_19:2_15:0;2O	[M+NH4]+	IGQGKOISINHLBS-UHFFFAOYSA-N	904.761	ESI pos	2.964	5650		7643		12370		20626		8508		8038		6651		7357		9686		10490		7116		5493		386	224	194	211	8227	9393	7418	8821
3.81_872.76	TG 52:4|TG 16:0_18:2_18:2	[M+NH4]+	LXAWUIOWWNQCQA-UHFFFAOYSA-N	872.762	ESI pos	3.812	618557		642697		932942		1008015		771752		652789		525093		224924		466278		270619		375555		158483		1012	1272	1685	1049	561731	590294	547741	601519
3.12_877.73	TG 52:4|TG 19:0_15:1_18:3	[M+Na]+	NSWONTPAOJSMGG-UHFFFAOYSA-N	877.729	ESI pos	3.123	86994		120147		143203		247778		109177		119422		72691		94558		127736		172612		99887		55743		384	299	124	501	98898	108729	100075	111398
3.83_891.68_3.82_875.71_3.81_870.76	TG 52:5	[M+K]+_[M+Na]+_[M+NH4]+	CQZAAIKPSLHIBC-KDJOUNIJSA-N	891.6846_875.7114_870.7609	ESI pos	3.82033	4064818		4116926		5560433		5515069		4804301		4178018		3467490		1409967		2990084		1658731		2399004		955652		4486	5113	6997	4496	3720513	3883391	3621396	3879010
3.36_886.75	TG 52:5;1O|TG 18:2_18:3_16:0;1O	[M+NH4]+	WPUXVKJIAPLMSO-UHFFFAOYSA-N	886.751	ESI pos	3.359	384277		467755		541524		672124		431048		433946		270580		115516		314316		232739		292434		66222		456	451	714	333	374495	406424	361802	419243
3.14_902.75	TG 52:5;2O|TG 18:2_19:3_15:0;2O	[M+NH4]+	FBWAYNIEKNLMTM-UHFFFAOYSA-N	902.746	ESI pos	3.141	15696		25923		39366		112463		18467		16248		9592		23464		13771		13725		8553		14302		90	531	198	177	12950	13691	12567	13584
3.68_889.67_3.68_873.70_3.67_868.74	TG 52:6	[M+K]+_[M+Na]+_[M+NH4]+	SSOSFUDNINFYLJ-KIYGNKBKSA-N	889.6706_873.6954_868.7424	ESI pos	3.67733	745575		1145570		894755		1529814		1549328		980752		745573		217550		541816		209940		341913		133605		1210	1600	1402	1193	721787	779671	703794	773228
3.20_884.73	TG 52:6;1O|TG 16:0_18:3_18:3;1O	[M+NH4]+	NEARCVKCLXTTGF-UHFFFAOYSA-N	884.735	ESI pos	3.204	72444		118834		124994		130685		115240		103621		74916		29014		80761		50486		60365		16069		273	337	296	87	84423	93207	78516	94811
3.49_866.72	TG 52:7|TG 16:2_18:2_18:3	[M+NH4]+	GLZHPWPMVDTTOB-UHFFFAOYSA-N	866.724	ESI pos	3.491	50430		68290		73650		147307		102409		57668		33602		8752		24877		8666		16359		6036		199	188	283	89	40880	43944	38965	43910
3.33_864.71	TG 52:8|TG 16:2_18:3_18:3	[M+NH4]+	CVTYUBZRISQRAD-UHFFFAOYSA-N	864.708	ESI pos	3.333	5626		8509		8123		19273		10958		6623		4955		1964		2950		1962		2050		1156		na	151	106	83	3889	4354	4200	5097
4.41_892.83	TG 53:1	[M+NH4]+	WWJIBIGWKGFVAQ-JNSYTQKUSA-N	892.834	ESI pos	4.406	4620		5143		7196		12430		7110		4422		2592		2580		2291		2666		2692		1744		2113	1941	1298	1703	4207	4528	3979	4374
4.29_890.82	TG 53:2	[M+NH4]+	RSINITWKVQRWSZ-RFVLVDBCSA-N	890.818	ESI pos	4.285	17961		18741		30429		76857		36682		16765		8686		5324		6323		5484		7116		3415		923	1080	836	1003	13638	14880	12663	14271
4.15_888.80	TG 53:3	[M+NH4]+	ZNQBEJJYVJSZLM-LEDQTTRKSA-N	888.803	ESI pos	4.148	75425		71318		112656		234522		125194		74387		31221		18715		20772		15585		26106		9868		1528	1286	1030	1198	50044	61648	51824	63563
4.03_907.71_4.02_891.74_4.01_886.79	TG 53:4	[M+K]+_[M+Na]+_[M+NH4]+	BMSDHYZLQWTKSQ-LSJAAEOESA-N	907.7119_891.7426_886.7859	ESI pos	4.02167	190914		205332		296628		550622		348484		225647		101214		48245		82889		58091		82997		33480		613	540	1152	542	144869	160424	140856	160962
3.88_889.73_3.88_884.77	TG 53:5	[M+Na]+_[M+NH4]+	QHYAATSKYBYSLG-BXDFBOBBSA-N	889.726_884.7703	ESI pos	3.8805	119918		126664		183650		395238		223160		131000		70959		23420		46936		26969		41854		14442		179	536	710	176	93931	103743	90264	102437
3.71_882.75	TG 53:6|TG 17:1_18:2_18:3	[M+NH4]+	CRAKBYXKEQVYKV-UHFFFAOYSA-N	882.754	ESI pos	3.715	71419		66794		91676		218004		109154		63795		26950		10310		24174		14941		26728		7501		387	316	293	293	46122	54280	44265	49626
4.47_908.86	TG 54:0	[M+NH4]+	KKBWDSMULWDHME-UHFFFAOYSA-N	908.857	ESI pos	4.469	24705		28320		48106		88037		36244		20458		10262		8302		5021		8234		12016		4983		5671	4686	4563	4363	18952	20563	16420	18700
4.43_927.78_4.43_911.80_4.43_906.85	TG 54:1	[M+K]+_[M+Na]+_[M+NH4]+	YFFIQXNTTVSKJC-NZEOUKRFSA-N	927.7785_911.8024_906.8491	ESI pos	4.43267	121178		137770		234625		451910		179320		108628		46871		36010		38057		24663		62518		19569		4021	4427	4206	3685	96806	101555	82862	94767
4.35_925.76_4.35_909.79_4.35_904.84	TG 54:2	[M+K]+_[M+Na]+_[M+NH4]+	WUUWGORPQFKFQN-XDVOZUNOSA-N	925.7639_909.7894_904.8379	ESI pos	4.34833	895393		988179		1773791		4384144		1493668		709271		239817		189370		192529		113528		287067		77355		2648	3892	3894	3550	525642	646822	524251	648564
4.22_923.75_4.22_907.77_4.22_902.82	TG 54:3	[M+K]+_[M+Na]+_[M+NH4]+	PHYFQTYBJUILEZ-IUPFWZBJSA-N	923.7468_907.7723_902.8205	ESI pos	4.216	5539031		5803462		6118331		6023495		6162048		4768257		1723077		1315082		1477209		745830		2041798		463941		4353	6892	6254	5228	4333361	4723657	4151553	4614034
4.09_921.73_4.09_905.76_4.09_900.81	TG 54:4	[M+K]+_[M+Na]+_[M+NH4]+	BRLGHZXETDWABO-NOFIOOQLSA-N	921.7304_905.7574_900.8058	ESI pos	4.09	6128185		6118395		6045572		6051845		6007807		6127813		5969031		5041784		5799444		4524833		6219799		2363896		7593	13596	14603	9605	6067360	6029342	6191715	6133258
3.69_916.80	TG 54:4;1O|TG 18:0_18:1_18:3;1O	[M+NH4]+	IXPPUZKXNGHXLW-UHFFFAOYSA-N	916.798	ESI pos	3.685	48690		55331		58528		62609		52645		52056		30268		22083		37222		32091		45855		10612		568	351	168	414	44776	48978	40171	46892
3.97_919.71_3.95_903.74	TG 54:5 Isomer A	[M+K]+_[M+Na]+	OEJXMJPFOHYSIU-GRLFFVHSSA-N	919.7149_903.7426	ESI pos	3.9595	327171		321201		331478		345677		337758		311274		279266		304157		280261		256883		315300		222141		2250	3502	4103	2876	328930	325973	314064	313054
3.54_914.78	TG 54:5;1O|TG 18:0_18:2_18:3;1O	[M+NH4]+	LWVCLSHSLUMABY-UHFFFAOYSA-N	914.783	ESI pos	3.536	240725		279118		334707		429642		283932		237783		143473		84972		162957		124162		200305		39969		415	518	794	420	211978	239028	208562	247509
3.95_898.79	TG 54:5|TG 18:1_18:2_18:2	[M+NH4]+	VVEBTVMJPTZDHO-UHFFFAOYSA-N	898.789	ESI pos	3.951	5741222		5635568		5633653		5971060		5614691		5860239		5874544		5859030		5935320		5655391		5747532		3779511		8204	14288	15895	8281	5720722	5713808	5803191	5720396
3.83_917.70_3.79_901.73_3.82_896.77	TG 54:6 Isomer A	[M+K]+_[M+Na]+_[M+NH4]+	HBOQXIRUPVQLKX-BBWANDEASA-N	917.7006_901.7265_896.7689	ESI pos	3.81333	5801963		5981600		5994300		5977270		6122111		6054248		6024139		6192107		6030342		6217046		6075040		6121900		17993	25947	32208	18816	5999535	6019183	5790719	5982560
3.36_912.77	TG 54:6;1O|TG 18:1_18:2_18:3;1O	[M+NH4]+	BIZYBMSSHGFOHB-UHFFFAOYSA-N	912.768	ESI pos	3.362	602476		677362		792647		1174427		694325		562167		322615		203054		386704		301669		449238		91232		603	791	691	651	519537	564362	491904	579272
3.12_912.77	TG 54:6;1O|TG 18:2_18:2_18:2;1O	[M+NH4]+	PEJGVKGDCQVMJQ-UHFFFAOYSA-N	912.766	ESI pos	3.125	116008		156474		192653		358204		150554		152546		91233		113907		155912		208108		119537		71519		583	445	657	674	121362	136432	121871	139474
3.10_928.76	TG 54:6;2O|TG 18:2_18:2_18:2;2O	[M+NH4]+	WJBZGNANTKYZFX-UHFFFAOYSA-N	928.761	ESI pos	3.098	127367		235608		239601		1107332		132411		114709		49849		178250		78014		99405		63566		100338		234	188	174	362	94060	99963	90741	95907
3.65_896.77	TG 54:6|TG 18:1_18:2_18:3	[M+NH4]+	OTUIORVXGJUHBH-UHFFFAOYSA-N	896.772	ESI pos	3.655	3914042		4056884		1077915		5830482		4833090		3920326		2336400		763304		2355183		1168983		2061244		560930		1195	2758	2453	1465	3478972	3710392	3435816	3642952
3.71_915.69_3.66_899.72_3.67_894.75	TG 54:7 Isomer A	[M+K]+ _[M+Na]+ _[M+NH4]+		915.6854_899.7168_894.7527	ESI pos	3.67667	5932954		5986054		5236623		5997537		5860720		5943118		6156408		5012314		6112181		6049351		6151701		3517246		7436	11114	13375	7947	5708658	5786253	6056697	6003840
3.19_910.75	TG 54:7;1O|TG 18:2_18:2_18:3;1O	[M+NH4]+	WPNABYOSCSUAOM-UHFFFAOYSA-N	910.751	ESI pos	3.195	1169481		1472641		1546297		2311238		1329350		1326508		679362		356238		952994		867449		1113231		207931		785	752	1155	938	1159547	1364634	1170434	1393301
2.97_926.75	TG 54:7;2O|TG 18:3_18:3_18:1;2O	[M+NH4]+	RWPSDTLGGIRPKJ-UHFFFAOYSA-N	926.746	ESI pos	2.973	58496		98941		131553		543329		68537		59028		32763		84518		50274		46247		35176		50590		206	218	116	239	47974	52726	46571	52271
3.04_908.74	TG 54:8;1O|TG 18:2_18:3_18:3;1O	[M+NH4]+	IXIWBHWTKQYZDO-UHFFFAOYSA-N	908.736	ESI pos	3.035	505710		703563		748674		1081883		711614		612588		477654		160093		514808		313723		428530		94883		168	272	635	599	489164	571009	501984	559954
2.82_924.73	TG 54:8;2O|TG 18:3_18:3_18:2;2O	[M+NH4]+	QPYOYKYFJJIVJH-UHFFFAOYSA-N	924.729	ESI pos	2.824	22660		42385		60796		194517		33645		26492		18730		31229		22542		16388		12896		19513		80	na	71	200	19346	20109	19620	20150
3.51_897.70_3.51_892.74	TG 54:8|TG 18:2_18:3_18:3	[M+Na]+_[M+NH4]+	IMPMCCKWZKDAGE-UHFFFAOYSA-N	897.6961_892.739	ESI pos	3.5105	5936688		6119215		6031938		5466183		6055186		6008393		5398049		1185809		4121842		1326024		2843218		669737		2589	3335	4164	3044	5751646	5887411	5697287	5890626
2.87_906.72	TG 54:9;1O|TG 18:3_18:3_18:3;1O	[M+NH4]+	XTGILNAGWOVVAM-UHFFFAOYSA-N	906.72	ESI pos	2.873	184328		416832		326730		316154		395406		301786		232053		70665		178324		100842		91812		36413		260	291	246	254	191032	223016	190956	212191
3.36_895.68_3.36_890.73	TG 54:9|TG 18:3_18:3_18:3	[M+Na]+_[M+NH4]+	UBEIMDKGOYBUKT-UHFFFAOYSA-N	895.6791_890.729	ESI pos	3.358	1490784		3385889		3247288		5221439		5017904		2447288		1529081		298745		770739		212587		290839		150003		701	886	1420	828	1394672	1505653	1327290	1546252
4.41_923.80_4.41_918.85	TG 55:2	[M+Na]+ _[M+NH4]+		923.7977_918.8498	ESI pos	4.41	21066		29294		41395		74934		39377		24861		15057		7410		10156		8326		8688		4885		1690	1394	1928	1628	17780	20774	16274	19129
4.29_916.83	TG 55:3	[M+NH4]+		916.833	ESI pos	4.288	15975		17638		26862		75431		31192		16557		8349		5535		5821		4887		6144		2706		441	214	423	436	11196	14401	12069	12776
4.16_914.82	TG 55:4|TG 19:0_18:2_18:2	[M+NH4]+	IYZMWOIQHCERKV-UHFFFAOYSA-N	914.817	ESI pos	4.159	49050		53604		78110		173658		92292		55760		27166		11258		17736		12390		18077		6590		917	509	782	496	34179	43028	35532	44253
4.02_912.80	TG 55:5|TG 19:1_18:2_18:2	[M+NH4]+	RSJQEUQJRFQHAE-UHFFFAOYSA-N	912.801	ESI pos	4.02	52965		60180		85540		182444		101928		57506		27980		10600		17791		12993		20117		6204		443	226	540	384	41162	44280	38691	45258
4.49_936.89	TG 56:0	[M+NH4]+		936.888	ESI pos	4.49	8378		9210		13301		26916		14985		7937		4719		3550		3597		4705		4262		3834		3295	2814	3202	2796	6209	7266	5662	7085
4.45_939.83_4.44_934.87	TG 56:1	[M+Na]+_[M+NH4]+	OCYFAHIHWCVZKS-FHSLLVMSSA-N	939.8287_934.8726	ESI pos	4.442	43438		54340		78822		163975		79692		46896		26733		14786		17997		12372		18667		9295		3293	2697	4287	3496	38912	37859	31471	37028
3.08_946.73	TG 56:11;2O|TG 18:3_18:3_20:5;2O	[M+NH4]+	XADZKJWJCOMYCJ-UHFFFAOYSA-N	946.728	ESI pos	3.077	9955		16455		13640		16207		10536		13224		9301		11541		17380		23471		17946		8634		272	204	163	117	13932	13682	12253	13362
4.43_953.79_4.43_937.82_4.44_932.87	TG 56:2	[M+K]+_[M+Na]+_[M+NH4]+	PDEQUPGHMOMBFC-FYEHETCMSA-N	953.7897_937.8184_932.865	ESI pos	4.434	189270		237038		340629		758761		347833		200576		110744		59918		73526		43591		78107		34104		3296	3733	3433	2707	157663	162037	136151	156653
4.35_951.78_4.35_935.80_4.35_930.85	TG 56:3	[M+K]+_[M+Na]+_[M+NH4]+	QXMHHXQBBKDSSL-BAQZNRHJSA-N	951.7777_935.8039_930.8506	ESI pos	4.35067	214431		254545		403572		1009312		417838		211151		85581		51791		55014		34140		65543		21672		1147	1497	1127	1090	147112	175408	141587	174301
4.23_949.76_4.23_933.79_4.22_928.83	TG 56:4	[M+K]+_[M+Na]+_[M+NH4]+	YONCDTJKIZDSKQ-IYASBODOSA-N	949.7603_933.7885_928.8332	ESI pos	4.22933	435915		495886		620329		1197149		711023		473160		192048		105989		146009		89701		148161		48598		913	1121	1676	1368	358429	382695	351638	385991
4.09_947.75_4.09_926.82_4.10_931.77	TG 56:5 Isomer B	[M+K]+_[M+K]+_[M+Na]+	UHEJWASONFIROS-YPSHDQQVSA-N	947.7452_926.8176_931.7721	ESI pos	4.09167	449972		487787		551389		816680		624120		558236		278150		164391		241602		205153		239898		112563		1330	3930	1308	1371	424065	448239	413463	442200
3.98_945.73_3.98_929.76_3.96_924.80	TG 56:6	[M+K]+_[M+Na]+_[M+NH4]+	ZTNDRFCABXFVMY-WJTCTALZSA-N	945.7302_929.7577_924.804	ESI pos	3.97333	173862		187195		241022		340194		253799		214656		133720		68500		116203		88422		103034		47310		896	696	1057	859	168284	181827	168349	177987
3.83_922.79	TG 56:7 Isomer A	[M+NH4]+	DODZUDCYRVWEOJ-GKZBLMSTSA-N	922.786	ESI pos	3.827	48392		63133		74807		95160		83274		59252		43447		14147		31315		20181		22496		10260		330	384	340	154	46526	47976	45180	47059
4.47_948.89	TG 57:1	[M+NH4]+	QLQFCWUGYPUXFE-MKFPQRGTSA-N	948.892	ESI pos	4.472	9705		11139		16140		30553		18467		11292		8886		4492		5778		5620		4713		3257		2648	2766	2635	2149	8769	8755	8833	8962
4.46_951.84_4.46_946.88	TG 57:2	[M+Na]+_[M+NH4]+	OQPANTOJGGHRCB-OEIGHXOUSA-N	951.8361_946.8795	ESI pos	4.458	36389		41244		59819		112356		59149		41085		29479		10529		17668		11315		14384		7356		2189	2037	2470	2588	28391	31790	27660	30074
4.41_944.87	TG 57:3|TG 21:0_18:1_18:2	[M+NH4]+	DBBVNPVUCZKTLC-UHFFFAOYSA-N	944.865	ESI pos	4.412	19986		27405		36281		73837		40852		21328		11914		5905		8907		5151		6710		3307		521	880	712	969	14893	17879	14221	16576
4.30_942.85	TG 57:4|TG 21:0_18:2_18:2	[M+NH4]+	CTPZQGUDKSDLOA-UHFFFAOYSA-N	942.849	ESI pos	4.305	20699		27691		33800		104336		41434		24130		12165		6042		9706		6316		8198		3595		260	467	798	148	15297	20022	16512	18819
4.48_967.86_4.49_962.90	TG 58:1	[M+Na]+_[M+NH4]+	OWZMHFAFGQCCNI-FBXRAONGSA-N	967.8604_962.9033	ESI pos	4.482	23866		26481		36728		86962		51070		29167		19539		7295		10997		8142		9301		7271		2787	2849	3000	2310	19677	22015	18611	21404
4.48_981.83_4.47_965.85_4.47_960.90	TG 58:2	[M+K]+_[M+Na]+_[M+NH4]+	NFQQJRGJJVQGAV-MEADVOAOSA-N	981.8251_965.8505_960.8965	ESI pos	4.47467	85644		98125		126302		332832		179766		100795		67673		25689		37137		22237		27703		17118		2071	2659	2622	2802	70777	76394	64249	73461
4.43_979.81_4.43_963.83_4.44_958.88	TG 58:3	[M+K]+_[M+Na]+_[M+NH4]+	RFMSTHTUAZETPD-JJPHLYBUSA-N	979.8101_963.835_958.8799	ESI pos	4.435	87177		115148		142337		313545		181861		102614		60159		25861		33654		18436		27665		15462		1492	1855	1837	1578	75979	75285	64742	74320
4.37_977.79_4.37_961.82_4.37_956.86	TG 58:4	[M+K]+_[M+Na]+_[M+NH4]+	CCKRHDUCFMOBKX-AAINFQTBSA-N	977.7906_961.8192_956.8649	ESI pos	4.366	101909		124439		152523		438364		190446		122975		58946		21038		36096		22583		28470		14601		952	1158	575	861	73398	82811	70212	82311
4.25_975.78_4.26_959.80_4.25_954.85	TG 58:5	[M+K]+ _[M+Na]+ _[M+NH4]+		975.7774_959.8036_954.8481	ESI pos	4.254	45158		65646		74468		152642		101868		64975		32961		11279		21468		11556		13884		8353		1812	1924	2362	1727	37983	40752	34700	41951
4.16_973.76_4.15_957.79_4.14_952.83	TG 58:6	[M+K]+_[M+Na]+_[M+NH4]+	GSNFRUMSEHHPSY-LCXCSEBNSA-N	973.7603_957.788_952.8322	ESI pos	4.14833	13710		25137		22134		34908		38436		21943		11811		4054		8100		4242		4389		2490		435	508	597	405	12538	14110	12401	14833
4.49_995.84_4.49_974.91	TG 59:2	[M+K]+_[M+NH4]+	ONQVFVNCAXIZPA-OEIGHXOUSA-N	995.8391_974.9114	ESI pos	4.489	19643		24833		35275		80967		40329		22876		19048		6561		8481		6628		7764		5364		2074	1716	1399	1693	16686	17079	15350	18615
4.46_972.90	TG 59:3	[M+NH4]+	GFWCWSZOZVIVJH-ZIURWEIWSA-N	972.895	ESI pos	4.459	21004		23850		35422		76069		42027		22304		16099		7023		9056		5302		6968		3735		941	1357	1199	766	18260	19079	15573	17280
4.42_970.88	TG 59:4|TG 23:0_18:2_18:2	[M+NH4]+	ANQPUWJPYXNDFZ-UHFFFAOYSA-N	970.881	ESI pos	4.416	27905		37597		52175		111846		60237		33896		21607		8167		14477		8991		10672		5459		513	747	311	523	23071	28806	21574	24038
4.51_990.94	TG 60:1	[M+NH4]+		990.936	ESI pos	4.511	10985		9837		14902		35005		20869		11811		9949		4154		5821		4218		3741		2970		1886	1936	1753	1547	7400	10193	7798	9445
4.50_1009.85_4.50_993.88_4.50_988.93	TG 60:2	[M+K]+_[M+Na]+_[M+NH4]+	QPNVLDQSHXVPMG-JMYPUKFOSA-N	1009.8525_993.8793_988.9282	ESI pos	4.50033	32407		34349		49105		124134		80053		40235		34155		9606		16957		10643		10041		7404		1766	2615	2522	2478	24548	30583	24404	30347
4.48_1007.84_4.47_991.87_4.47_986.91	TG 60:3	[M+K]+_[M+Na]+_[M+NH4]+	IJOXAPFYWITIHW-KUBXGBLDSA-N	1007.8434_991.8669_986.9123	ESI pos	4.47467	38907		45650		62897		155643		101373		49888		36006		12175		19417		10638		12446		8063		1500	1915	1670	1456	33291	38850	32192	36035
4.44_1005.83_4.44_989.85_4.44_984.90	TG 60:4	[M+K]+_[M+Na]+_[M+NH4]+	WECVQMVSEHWZQR-ULZSGHTGSA-N	1005.827_989.8494_984.8958	ESI pos	4.44067	64300		80893		106986		254111		142394		86956		72127		18236		39620		18177		21642		15847		741	1141	924	735	62487	61102	54414	62266
4.39_982.88	TG 60:5	[M+NH4]+		982.88	ESI pos	4.387	14374		21041		30018		81065		44007		22864		15823		3951		8928		3882		4489		3029		485	284	416	475	14394	14978	13249	15015
4.29_980.86	TG 60:6	[M+NH4]+	ZMJSZQBPVUGYMY-KUCWVPRQSA-N	980.864	ESI pos	4.285	3543		5704		6277		14507		11311		5366		3599		1514		2615		1234		1396		1127		404	109	234	306	3772	3791	3058	3660
4.53_1018.97	TG 62:1	[M+NH4]+		1018.97	ESI pos	4.534	4009		3694		4553		8884		5738		3500		3039		2362		2185		2700		1659		1802		1418	1788	1693	1876	2839	3462	2962	3072
4.52_1016.96	TG 62:2	[M+NH4]+		1016.96	ESI pos	4.524	7348		8886		11942		29613		16096		8776		8815		3189		4497		3724		2532		2746		1164	1497	1427	1111	6689	7246	7546	7338
4.49_1019.89_4.50_1014.94	TG 62:3	[M+Na]+_[M+NH4]+	QSEFCNRWIMUGOX-QFXJXGHKSA-N	1019.8909_1014.9438	ESI pos	4.4935	9258		10750		14647		40935		28022		13385		11169		2853		5868		3523		3664		2691		888	1057	2150	939	8558	9854	8961	9564
4.48_1017.88_4.48_1012.93	TG 62:4	[M+Na]+_[M+NH4]+	AHXIACCOHSVLRP-ULZSGHTGSA-N	1017.8812_1012.9274	ESI pos	4.4775	15543		18557		23473		71142		41434		21998		17450		4665		8809		5144		5105		4450		1285	927	625	634	16138	16460	14818	17184
4.45_1010.91	TG 62:5|TG 26:1_18:2_18:2	[M+NH4]+	OEXIKZYHPRWSJP-UHFFFAOYSA-N	1010.91	ESI pos	4.45	4818		7995		9361		24135		15519		8400		7029		1911		3912		2145		2541		1950		635	640	537	681	7083	6934	5803	6384
4.54_1044.99	TG 64:2	[M+NH4]+		1044.99	ESI pos	4.543	2892		3354		3860		7736		4512		2724		1733		1676		1834		2638		1369		1531		1391	1071	1063	776	2569	3470	2761	3328
4.52_1042.97	TG 64:3	[M+NH4]+		1042.97	ESI pos	4.52	3654		3872		4798		9066		6522		4197		2616		1513		1667		1833		1403		1057		883	1016	1087	498	2781	3359	3221	2859
4.50_1040.96	TG 64:4	[M+NH4]+	IABPCCHORNRSBT-ULZSGHTGSA-N	1040.96	ESI pos	4.504	4127		5277		6321		14667		8875		6035		3157		1601		2133		2030		1810		1672		770	575	1471	791	3651	4360	3687	3909
4.60_1272.09	TG 81:10|TG 19:0_30:2_32:8	[M+Na]+	CAKIJDMSGJEQIK-UHFFFAOYSA-N	1272.09	ESI pos	4.6	21502		32164		22501		9220		18458		30409		24586		50080		40434		55385		28924		40172		na	na	na	217	30881	38617	29014	35706
3.80_897.77		[M+H]+		897.767	ESI pos	3.799	5759528		5771716		5821562		5951680		5884868		5804225		5707546		1945954		5743891		5734631		5075637		1437247		8899	12802	16912	9891	5772805	5758436	5787227	5794566
3.94_899.78		[M+H]+		899.785	ESI pos	3.945	5845902		5837323		5863948		5895658		5837520		5842590		4195636		4614120		4420904		4051165		4276468		2322541		5455	9051	11131	6527	5713046	5754064	5725452	5711001
3.66_895.76		[M+H]+		895.759	ESI pos	3.659	5714131		5717070		2219433		5907074		5857230		5740488		5735520		3059923		5758808		4275020		5697200		1942650		4175	5510	7297	3961	5711068	5742220	5702644	5698070
4.08_337.27		[M+H]+		337.274	ESI pos	4.082	13425		14639		18838		23913		17267		13589		6748		4738		5767		4614		7252		2998		192	444	339	289	11257	11222	11303	11211
0.22_507.12		[M-H]-		507.117	ESI neg	0.216	1999		1581		1408		1991		3174		2303		2298		2768		2063		1794		1591		1966		na	130	17	150	2344	2365	2378	2364
4.07_875.15		[M+H]+		875.151	ESI pos	4.073	6841		5190		5758		8766		9940		6950		2692		1902		3647		1443		2383		708		na	na	na	na	4747	4814	4784	4828
3.94_829.71		[M-H]-		829.71	ESI neg	3.94	1633		4161		1506		441		1610		2912		1896		5922		3666		7040		4378		3994		na	20	22	na	4279	4325	4306	4360
3.68_981.86		[M+H]+		981.857	ESI pos	3.68	4098		4276		4678		4619		4412		4351		5009		4136		5490		4330		5179		2843		393	90	122	305	4464	4439	4471	4385
3.95_961.70		[M+H]+		961.7	ESI pos	3.952	15743		14450		14854		15387		14970		14870		12970		13527		13663		12114		15400		9552		na	na	na	101	15053	15071	14778	14974
0.21_134.06		[M+H]+		134.06	ESI pos	0.212	3249		4077		4610		3377		3041		4902		5198		3852		5221		3997		3626		4279		469	520	526	416	4001	3959	3906	3921
2.44_617.51		[M+H]+		617.514	ESI pos	2.44	9959		12449		17313		40333		17086		12626		4762		2899		5476		5437		4540		1814		315	151	362	275	8189	8267	8359	8397
3.94_873.78		[M+H]+		873.778	ESI pos	3.939	5774733		5862403		5844726		5804726		5925088		5873489		4668326		2750859		4515266		3601693		4205634		1802209		5212	7880	9377	4561	5523894	5656808	5538526	5627167
2.98_700.60		[M-H]-		700.603	ESI neg	2.981	874		1981		1541		1342		2158		2249		2278		2919		6120		6151		7515		6091		na	15	13	na	2566	2555	2601	2528
3.66_852.72		[M+H]+		852.722	ESI pos	3.664	5295		8025		4942		9132		8566		5190		4255		1737		4144		1368		2804		1206		225	288	220	240	4494	4616	4591	4530
3.66_964.83		[M+H]+		964.834	ESI pos	3.662	26264		24894		22376		14787		23830		25898		27056		21195		29103		23578		29217		15638		578	552	545	463	25798	25683	26144	25287
2.19_397.38		[M+H]+		397.383	ESI pos	2.194	14381		17601		16669		15206		14917		18772		15743		22169		24488		24520		24516		26561		78	na	71	117	23070	22800	23507	23453
3.82_335.26		[M+H]+		335.259	ESI pos	3.816	4946		4772		7642		9946		7411		5554		3652		2026		3170		2271		3889		1372		294	172	210	238	4841	4730	4878	4754
2.45_661.55		[M+H]+		661.551	ESI pos	2.446	15469		14771		15272		22405		15240		15492		10566		6893		11546		10671		11647		4591		406	286	274	365	14022	13971	14427	14276
3.79_902.73		[M+H]+		902.73	ESI pos	3.786	246039		247327		230775		186454		240955		244217		226287		225098		227462		230165		247002		199316		2297	2832	2776	1635	245768	247457	238572	245944
3.65_898.77		[M+H]+		898.773	ESI pos	3.65	125009		132110		42678		222044		159442		132812		81826		36271		81952		48652		77567		25049		600	795	583	311	110590	113779	112033	114778
3.65_863.69		[M+H]+		863.692	ESI pos	3.649	10246		12514		4655		3799		10081		16951		20195		44803		32676		50478		30002		42528		177	248	161	141	20288	20585	20004	20801
2.44_599.50		[M+H]+		599.503	ESI pos	2.439	9132		12190		17141		32993		15001		12086		4697		3402		5525		5910		4460		2219		188	229	478	241	8170	8489	8314	8439
3.71_942.81		[M+H]+		942.813	ESI pos	3.715	5800		8268		7914		10299		7948		6541		4812		2577		4011		3728		5431		1462		127	159	212	160	6141	6177	6106	5934
3.79_903.74		[M+H]+		903.735	ESI pos	3.785	83478		83879		77006		64678		80899		82034		80821		79815		77749		83088		87769		70812		1080	1081	1814	969	82876	81849	79393	81452
1.44_465.36		[M-H]-		465.356	ESI neg	1.437	1318		1751		1506		872		1745		1262		921		2406		1852		1935		1993		1757		na	na	na	26	2078	2022	2005	2074
3.11_599.50		[M+H]+		599.503	ESI pos	3.114	5358		8227		9855		23831		6840		6757		3947		6944		6212		7959		4906		4456		246	204	134	109	5921	5924	6094	6125
3.83_954.85		[M+H]+		954.849	ESI pos	3.834	13275		13969		15043		12941		12685		13432		16825		12392		14654		12462		12920		9769		489	647	736	173	13699	13872	14172	13592
3.66_950.82		[M+H]+		950.817	ESI pos	3.659	9658		9482		5707		6681		8766		8976		9177		7696		9713		8762		9322		5618		105	169	432	405	9887	9560	9937	9657
4.22_972.90		[M+H]+		972.895	ESI pos	4.217	16096		16259		15708		15693		17115		14962		10104		8191		8728		6492		10827		4984		622	552	325	574	14164	14139	13844	14488
3.79_898.78		[M+H]+		898.78	ESI pos	3.792	5096305		5306896		5349406		5838522		5460686		5097142		3330042		2127928		3390060		2813550		3702556		1457441		3357	4637	7623	3346	4685781	4879233	4692522	4793236
3.66_894.70		[M+H]+		894.703	ESI pos	3.656	77224		80059		29819		52210		78613		82325		65913		35165		64137		43574		66780		22934		220	164	93	na	77487	76472	79224	75675
3.94_872.72		[M+H]+		872.721	ESI pos	3.943	67394		69871		75354		83426		74340		72771		54121		35929		50280		42521		51824		25370		191	316	431	na	64386	65825	62704	64159
0.23_427.27		[M+H]+		427.267	ESI pos	0.23	4402		2611		5278		2645		4505		5501		5994		8011		4072		4483		4912		4124		61	184	300	281	3740	3695	3700	3856
0.26_313.24		[M-H]-		313.239	ESI neg	0.262	1111		1321		2107		1394		1728		2640		1939		3519		3470		4466		3463		3087		62	85	45	55	1934	2022	1945	1956
0.20_633.08		[M-H]-		633.076	ESI neg	0.204	46009		41974		39646		33792		43919		43319		42506		45230		38579		38215		36868		40093		na	3034	234	1583	41309	42420	43271	41741
4.56_1306.05		[M-H]-		1306.05	ESI neg	4.559	685		1016		653		233		483		1151		738		1627		1347		1644		940		1466		na	na	na	na	1250	1224	1195	1246
3.92_982.88		[M+H]+		982.882	ESI pos	3.924	34423		35980		36616		33331		36275		34352		33798		38621		32068		32889		37516		29615		861	1084	1073	814	36151	35021	34505	35707
3.94_337.27		[M+H]+		337.274	ESI pos	3.938	24382		26129		29227		44912		32012		23707		14431		10805		13051		11113		14543		6087		636	215	471	305	21318	22181	21147	21585
2.80_930.77		[M+H]+		930.771	ESI pos	2.801	5210		5744		9032		16494		7429		6022		4716		5746		6917		9601		5954		3672		216	169	384	285	6698	6599	6463	6790
0.21_272.11		[M+H]+		272.113	ESI pos	0.206	3547		2494		4748		4011		3417		4503		5092		5190		3574		4432		3654		4552		132	124	172	140	3677	3490	3614	3561
1.84_475.39		[M-H]-		475.394	ESI neg	1.844	1678		1949		1584		2381		2503		1255		1290		2275		703		2251		1732		1299		na	na	na	na	1937	1908	1845	1856
4.00_898.85		[M+H]+		898.846	ESI pos	3.998	79410		84123		66144		50370		77501		68330		70046		86388		63295		67603		80767		26678		478	291	434	401	75657	71849	74768	75214
3.66_261.22		[M+H]+		261.221	ESI pos	3.658	14506		17132		20122		31036		21196		15704		9870		4432		10040		5200		8425		2563		na	138	149	89	12592	13282	12778	12763
3.95_935.68		[M+H]+		935.683	ESI pos	3.95	7881		7849		6925		6117		7057		8516		10613		8289		10323		10482		10206		7369		281	na	na	209	8244	8170	8344	7901
3.94_900.85		[M+H]+		900.853	ESI pos	3.937	167313		163747		166771		91131		169581		159065		107634		90784		103830		74513		122441		43848		494	514	929	534	161742	160257	153171	158936
4.21_965.73		[M+H]+		965.731	ESI pos	4.215	10683		11882		13243		11734		13081		9368		5335		5126		4850		3983		6677		2720		na	na	na	na	9360	9902	9636	9752
3.94_875.78		[M+H]+		875.781	ESI pos	3.939	393611		405478		443973		485708		431149		413885		272647		159227		257514		206404		238331		112072		913	1220	1076	655	352020	364631	343866	356567
3.65_957.68		[M+H]+		957.677	ESI pos	3.654	23761		24900		9618		13257		24026		24062		22058		13466		21436		17651		22113		10353		na	129	99	152	24379	24487	23190	24142
3.78_924.79		[M+H]+		924.785	ESI pos	3.779	80689		78342		74213		66049		75847		75724		79436		79608		76625		83682		86733		68140		1483	1573	1986	2078	81787	78440	77158	79131
3.36_982.84		[M+H]+		982.843	ESI pos	3.361	10323		9744		11854		12351		10401		9280		5963		6429		8137		7411		9412		3826		441	322	430	359	9572	9822	9901	9377
4.64_857.80		[M+H]+		857.801	ESI pos	4.641	13249		22199		17956		7856		8257		1654		16599		15440		27795		31369		17187		25503		645	817	520	767	16939	17592	16597	17238
3.10_950.69		[M+H]+		950.692	ESI pos	3.096	9981		13242		13532		36710		8516		7022		3646		11065		5329		5845		4927		6857		308	na	96	183	6293	5918	6162	6108
3.36_907.68		[M+H]+		907.679	ESI pos	3.359	13536		14774		15899		14367		11477		14109		10974		6290		12466		10538		13306		4418		na	143	na	na	14301	13773	13553	14209
0.31_274.27		[M+H]+		274.275	ESI pos	0.306	52840		115041		74398		106296		58981		80418		65493		95502		94838		89462		101273		67374		8197	8589	8038	8012	82919	85330	81348	80532
2.11_553.48		[M-H]-		553.475	ESI neg	2.111	825		1696		1366		1208		1533		1160		764		550		471		431		459		392		na	na	na	na	1717	1673	1773	1756
3.84_959.68		[M+H]+		959.684	ESI pos	3.837	20689		21056		19081		19381		20306		20699		21824		20390		21972		21885		22467		17977		107	226	171	225	21478	20890	20326	20375
3.65_877.73		[M+H]+		877.729	ESI pos	3.655	128199		138237		77596		241934		173571		134574		82413		30544		83952		46973		82977		20845		309	258	244	171	117982	123709	118130	123229
3.43_932.79		[M+H]+		932.792	ESI pos	3.43	24150		40948		46202		166538		26880		17311		8791		31681		11207		12883		10420		14757		188	259	326	135	15079	15557	15222	15986
3.62_881.73		[M+H]+		881.73	ESI pos	3.621	15639		17115		8343		5666		15249		26331		28851		65335		48035		74939		39791		64521		129	296	314	315	31874	32024	30234	31638
3.94_874.78		[M+H]+		874.779	ESI pos	3.94	1974682		2121397		2298354		2588313		2223562		2137105		1374754		749935		1296713		977970		1188742		506301		1864	2608	3764	2569	1780971	1845555	1731833	1797318
3.65_915.69		[M+H]+		915.689	ESI pos	3.654	118130		112850		58000		77476		114520		118639		118310		91981		116788		105357		121972		76044		756	956	1397	923	121079	120414	118237	114187
3.94_265.25		[M+H]+		265.252	ESI pos	3.941	6657		6771		8107		12687		7438		6413		3556		2137		2991		2699		4047		1358		na	221	na	247	5894	5803	5536	5714
3.79_899.78		[M+H]+		899.781	ESI pos	3.793	1037455		1088107		1124178		1480620		1166243		1027640		630531		428205		632305		536953		701116		301080		1270	2052	1752	1733	932406	979371	921231	943555
3.65_921.77		[M+H]+		921.766	ESI pos	3.654	142109		134263		82362		129837		133480		136849		130615		106636		125356		116458		129862		91696		892	1189	1643	1175	137634	139810	131235	135659
2.20_603.54		[M+H]+		603.535	ESI pos	2.201	13994		26391		19772		49226		25310		17941		8682		6816		11901		7474		9127		5514		495	360	493	373	20201	19489	19244	20334
0.22_234.19		[M+H]+		234.185	ESI pos	0.22	7581		8637		5633		4429		5456		6270		4766		7177		8567		6893		7461		8407		70	405	343	252	5099	4799	4949	4839
0.21_170.08		[M+H]+		170.081	ESI pos	0.213	4454		7517		7937		6113		5635		8021		6773		5799		8258		7291		7454		7763		235	381	304	670	8089	7627	7756	7653
4.08_930.83		[M+H]+		930.831	ESI pos	4.08	9774		9857		10183		11915		11700		11493		10321		10907		9658		11648		9694		7468		113	178	389	105	10573	10309	10099	9923
3.94_901.80		[M+H]+		901.798	ESI pos	3.94	610078		617491		685584		942638		730273		541620		347363		287882		335387		245893		392511		150046		979	1653	1933	1039	544242	565234	529026	551015
0.21_152.07		[M+H]+		152.071	ESI pos	0.213	9146		13093		13087		10129		9921		12838		11750		11153		14558		12396		10613		13057		1069	785	1197	1055	11283	11313	10694	10888
3.63_571.47		[M+H]+		571.473	ESI pos	3.633	3985		5971		5061		11754		6924		4422		3504		1868		2982		2319		3360		1593		530	178	500	539	4373	4512	4365	4218
3.94_874.84		[M+H]+		874.837	ESI pos	3.937	122061		128545		136509		144011		131095		126694		87971		50825		86054		61979		76726		36155		728	607	561	719	115129	117095	109701	113428
3.79_337.27		[M+H]+		337.274	ESI pos	3.793	30338		30689		32983		52940		32416		29044		17982		11832		18327		15076		20120		8515		493	426	187	371	25037	25984	24764	26204
3.79_937.80		[M+H]+		937.797	ESI pos	3.789	75749		78099		74756		63526		75150		74678		73963		65031		71757		72032		80592		46394		490	668	910	818	78261	76376	73291	75051
4.09_963.72		[M+H]+		963.716	ESI pos	4.09	14614		14970		14530		14189		15563		15383		12261		11304		12765		9857		13910		6998		na	na	197	na	14921	15762	14945	15549
0.20_785.09		[M-H]-		785.086	ESI neg	0.2	22831		19242		20772		20972		27864		22626		18871		24089		23932		21910		19630		24767		na	1961	92	950	26990	26337	28013	26510
4.21_579.53		[M+H]+		579.534	ESI pos	4.213	26665		31884		46124		71646		39140		26293		11085		5683		10201		4702		9064		2713		432	442	910	284	19499	20706	19652	20290
3.94_875.18		[M+H]+		875.182	ESI pos	3.938	6206		5863		6395		6766		6368		3792		3575		2590		4831		2530		3608		1492		na	na	na	na	4035	4258	4176	4307
3.94_848.76		[M+H]+		848.762	ESI pos	3.945	14778		14574		20254		20068		16453		14938		12535		6442		10804		6415		8513		4735		1107	613	672	750	12820	12843	12294	13183
4.09_956.86		[M+H]+		956.862	ESI pos	4.089	7115		7132		6882		6999		7003		7030		6874		6004		6769		5474		8047		4748		525	377	698	557	7249	7617	7764	7546
0.20_277.03		[M+H]+		277.034	ESI pos	0.202	5421		6718		6096		6121		6159		5980		5809		6734		7596		6730		7539		6997		na	424	447	623	6581	6173	6539	6383
3.79_245.23		[M+H]+		245.226	ESI pos	3.794	7107		6642		6860		9555		7566		6020		3255		2188		3840		3040		3462		1623		104	na	na	na	5147	5301	5135	4940
3.51_913.67		[M+H]+		913.669	ESI pos	3.51	104844		113155		117302		114169		120567		111942		98538		42883		84504		44215		70877		31107		102	445	468	376	102616	106694	99364	102803
1.44_383.35		[M-H]-		383.355	ESI neg	1.436	175708		230699		229419		140111		254721		203112		156248		332458		262718		285144		283025		258061		1381	2390	1446	2737	277256	284329	270171	288876
4.07_857.76		[M+H]+		857.761	ESI pos	4.073	11691		12195		16324		19175		14295		10501		6979		4536		4952		4022		5142		2258		442	325	449	648	9668	10234	9700	9614
3.70_958.67		[M+H]+		958.674	ESI pos	3.697	15165		15441		10711		13237		14847		16122		14016		8735		14244		11665		14563		7465		na	97	97	na	15966	16507	15388	15724
3.62_958.67		[M+H]+		958.671	ESI pos	3.621	15165		5312		6651		6813		14770		16122		14016		8735		14244		10184		14563		7275		na	97	na	na	15966	16507	15388	15724
3.25_861.66		[M+H]+		861.659	ESI pos	3.255	5295		7325		9140		5225		7877		9932		9501		12874		13499		14880		13349		13338		95	na	98	122	8621	8426	8994	8903
3.79_901.78		[M+H]+		901.783	ESI pos	3.79	58595		59287		56721		58374		59417		58084		45359		40821		45422		43712		51021		34047		423	838	773	606	54518	54678	51234	53985
3.91_729.67		[M+H]+		729.674	ESI pos	3.908	2063		1977		2711		1566		2456		3280		2773		4368		3832		5065		2826		3656		299	116	434	235	2713	2835	2920	2822
0.24_169.01		[M-H]-		169.015	ESI neg	0.245	14659		14763		11542		9129		16809		13220		12161		16454		12048		12761		9800		13568		172	1648	636	842	30127	30703	29511	31676
3.94_898.73		[M+H]+		898.734	ESI pos	3.938	81188		81320		86462		84759		85333		76902		58823		50115		56422		46478		64247		29448		na	228	250	na	78876	79032	76870	74023
3.66_600.56		[M+H]+		600.558	ESI pos	3.658	9741		11210		2955		28446		13820		10092		5164		1716		4936		2023		4138		1411		188	277	344	225	8315	8714	8207	8689
3.67_868.80		[M+H]+		868.802	ESI pos	3.667	40461		57064		42079		67274		74286		50170		39724		13343		30516		9496		16662		7057		578	552	652	497	41073	39799	38204	40352
3.66_890.78		[M+H]+		890.782	ESI pos	3.656	14859		14778		12946		18391		14653		14033		10285		8075		9462		9514		11083		3406		300	373	508	395	13030	13545	12687	13506
1.97_736.53		[M+H]+		736.534	ESI pos	1.967	10241		12274		12536		11120		11832		13210		13875		19671		19029		20595		20697		19379		168	381	354	406	16154	17115	17313	16594
3.94_599.56		[M+H]+		599.556	ESI pos	3.938	45430		47098		53237		67785		54966		43977		23738		14369		22556		15524		24407		5132		na	na	na	na	38943	40119	37172	38890
3.84_966.85		[M+H]+		966.849	ESI pos	3.837	21527		21419		21296		20261		21768		20706		17673		25424		17714		25598		19485		21825		345	613	1019	413	22227	20927	21220	20717
3.47_900.76		[M+H]+		900.762	ESI pos	3.469	3863		4686		5177		6978		4923		4980		3716		2854		3572		3258		3446		1673		273	146	92	na	3980	3800	4054	4076
2.87_933.73		[M+H]+		933.73	ESI pos	2.871	39416		68875		56508		46390		63784		54754		46476		19079		37189		25466		22826		11824		195	200	na	198	40090	42828	40089	41369
0.18_649.07		[M-H]-		649.071	ESI neg	0.181	2120		1953		2171		1910		1785		1818		1736		1264		1724		1574		1559		1492		na	201	24	159	1374	1375	1458	1362
3.79_178.94		[M-H]-		178.945	ESI neg	3.79	1638		1868		2039		2730		1862		1549		874		604		907		584		928		460		315	180	176	218	1581	1524	1628	1526
3.29_972.86		[M+H]+		972.859	ESI pos	3.286	4612		5575		7734		9456		5190		5976		4859		4796		5928		7825		4181		2951		492	536	491	510	4616	4857	4495	4655
4.23_1012.93		[M+H]+		1012.93	ESI pos	4.231	3937		4760		4301		5429		5418		4414		3930		2030		2757		1946		2876		1509		593	322	250	501	3905	3737	3628	3676
3.95_939.81		[M+H]+		939.812	ESI pos	3.948	44299		42414		44985		36535		45334		41544		36962		35620		34311		31293		41525		20134		313	777	647	664	41316	43157	39869	41206
3.94_879.73		[M+H]+		879.733	ESI pos	3.938	34885		33900		30560		30277		29923		36880		37179		29355		36387		37413		33708		28040		339	597	811	157	35470	33052	33973	33191
3.94_900.80		[M+H]+		900.798	ESI pos	3.94	3277937		3270493		3700390		4874166		3794272		2878184		1716224		1389824		1618977		1179380		1950922		656049		2927	5080	3976	2658	2831642	2948312	2726739	2879172
4.08_829.71		[M-H]-		829.711	ESI neg	4.078	1096		2313		1503		985		1488		2015		1592		6302		3247		8754		3829		4229		na	18	na	na	3013	2815	2810	2885
3.94_599.50		[M+H]+		599.505	ESI pos	3.939	805918		853964		1009393		1451534		995104		771043		415801		254780		389599		281024		419089		139019		761	1446	1510	652	663956	709488	660542	679117
4.22_946.87		[M+H]+		946.875	ESI pos	4.219	10401		10235		11889		9912		11982		9525		7364		6465		6887		4581		6863		3924		1600	824	1122	1218	9633	9903	9939	9249
1.74_1175.87		[M+H]+		1175.87	ESI pos	1.742	3177		4548		3371		1749		3233		4026		3486		4993		4378		4475		4353		4745		na	66	na	na	4517	4714	4511	4822
3.94_601.52		[M+H]+		601.52	ESI pos	3.938	852734		901879		1044604		1651234		1055402		755865		385017		277030		355272		256870		435399		136820		497	1093	1297	632	701444	741177	686440	701874
0.25_311.22		[M-H]-		311.224	ESI neg	0.25	1874		2260		3700		2036		2926		5034		3781		4999		4604		5974		5337		4049		19	104	146	105	2822	2661	2876	2816
0.20_783.07		[M-H]-		783.071	ESI neg	0.195	48373		51403		54171		56393		53522		47675		49464		48832		56915		51337		52708		55821		na	1795	252	1073	55844	55292	57948	53452
4.09_599.50		[M+H]+		599.504	ESI pos	4.095	169733		218090		235835		385320		225164		208222		91916		46040		91116		62137		102773		27667		281	800	688	582	148920	160783	151248	154132
3.65_898.58		[M+H]+		898.576	ESI pos	3.652	4203		2896		5584		14097		6399		5036		1740		883		2827		1620		1908		990		na	na	95	114	4334	4194	4422	4541
0.22_553.16		[M-H]-		553.164	ESI neg	0.217	2105		2615		1879		1627		2121		1986		1879		2040		2925		2887		1694		2407		na	14	19	63	2323	2403	2358	2508
1.36_568.43		[M+H]+		568.428	ESI pos	1.356	28278		20249		23928		21632		36726		28606		25892		44283		23709		25949		26303		24812		365	255	574	277	39796	40179	37883	41035
4.18_816.70		[M+H]+		816.697	ESI pos	4.181	1591		2283		1280		413		1187		2260		2765		5694		6256		8842		7394		7700		284	154	na	102	3038	3288	3231	3202
3.81_911.78		[M+H]+		911.785	ESI pos	3.81	17583		15961		19586		15874		18622		16772		18487		11313		16365		11947		14761		8341		574	351	629	387	16409	17321	15982	16616
0.21_301.00		[M-H]-		301	ESI neg	0.215	64094		68512		65468		49798		76558		74158		72310		91998		88537		84794		81224		95961		86	6803	920	2767	161702	159378	171800	161775
3.99_957.87		[M+H]+		957.867	ESI pos	3.993	14798		14111		13734		12690		13959		14933		9467		6351		7869		7152		9333		3807		684	402	669	383	15206	14670	14690	13997
1.50_427.38		[M-H]-		427.381	ESI neg	1.498	1776		1895		1614		1050		1599		1667		1118		2749		2461		4393		4729		3571		16	na	na	13	4702	4432	4689	4424
3.94_575.56		[M+H]+		575.555	ESI pos	3.938	35149		37294		41729		52771		42012		38618		21269		10896		19566		14976		18408		6075		117	116	na	114	30407	31686	29178	30773
3.51_899.70		[M+H]+		899.702	ESI pos	3.514	67269		74391		82289		88880		86337		74129		64084		21398		50863		22971		42107		13855		na	262	172	110	66319	66562	63297	68803
4.08_902.87		[M+H]+		902.868	ESI pos	4.082	142353		154336		159185		131761		163443		138911		67261		56091		65736		50978		90033		15930		130	493	434	387	130888	136778	125830	132057
3.94_575.50		[M+H]+		575.505	ESI pos	3.938	621056		671423		746372		981880		718604		660149		365466		185206		342934		266073		327412		124015		1361	1340	1288	958	520542	553429	511916	535904
2.55_1008.82		[M+H]+		1008.82	ESI pos	2.55	2506		3155		3985		3505		2829		3150		3646		2550		4446		4837		4458		1870		131	155	181	168	3871	3844	4144	3990
3.84_980.86		[M+H]+		980.863	ESI pos	3.841	49741		50684		45976		44814		50920		49278		41802		28655		35409		34280		40950		18721		664	1033	860	434	51541	49709	51721	48024
3.14_907.70		[M+H]+		907.701	ESI pos	3.139	5091		7756		10290		22705		5167		4650		4219		7009		4562		4438		3659		5683		na	77	493	144	4240	3961	4125	4283
2.79_1012.85		[M+H]+		1012.85	ESI pos	2.794	3264		3806		6115		9798		4269		4497		2686		3352		5059		7048		4355		2732		214	428	317	231	4248	4551	4399	4584
3.36_897.69		[M+H]+		897.687	ESI pos	3.361	21756		39554		36383		47134		51799		32967		23910		6153		14298		4518		7345		3802		na	na	97	100	21424	21171	20272	22057
3.79_904.74		[M+H]+		904.736	ESI pos	3.79	21224		20128		20658		16950		19804		19993		18648		18013		18449		17808		19749		15821		257	638	429	130	19631	20293	18922	18849
4.22_575.50		[M+H]+		575.505	ESI pos	4.221	28639		38935		49309		78753		44186		32550		13681		5530		10646		5630		10556		3729		276	407	433	314	22050	23535	22380	23629
0.23_409.18		[M-H]-		409.184	ESI neg	0.226	3304		3540		2634		2132		2074		2649		3647		2737		2299		1588		1747		1707		na	23	21	na	2414	2606	2597	2568
3.94_905.75		[M+H]+		905.747	ESI pos	3.944	55660		55249		48931		43965		53395		48073		46533		51894		47006		42484		55835		36816		738	1040	1004	605	54507	57243	53264	53068
0.17_858.08		[M-H]-		858.076	ESI neg	0.169	974		1578		1602		2383		1904		1467		1466		1271		2230		1645		1402		2415		na	40	na	na	1518	1589	1633	1641
0.23_463.23		[M-H]-		463.234	ESI neg	0.226	1014		700		1064		724		1386		1350		1132		1268		1683		1708		1357		1513		na	na	na	na	2171	2251	2140	2314
2.66_949.72		[M+H]+		949.723	ESI pos	2.658	3335		6920		7445		10312		5268		4689		2238		3107		2852		1413		1655		2283		71	165	75	134	3016	2853	2788	2815
3.43_691.60		[M+H]+		691.602	ESI pos	3.431	5370		5499		7235		4493		7001		7151		6549		12288		11204		15935		9552		13012		100	254	na	93	5667	6176	6006	5928
3.76_547.47		[M+H]+		547.472	ESI pos	3.761	4489		3552		5484		10957		7342		4226		2576		1140		1775		1821		1543		1011		143	576	199	111	3409	3168	3241	3159
3.26_930.78		[M+H]+		930.776	ESI pos	3.259	60033		97811		117768		472731		62898		41713		19420		82138		24290		27446		22796		32097		137	109	232	357	36138	37934	35382	38030
3.35_869.72		[M+H]+		869.722	ESI pos	3.355	7891		9998		11892		14866		10110		10315		7709		17782		11778		17348		10397		12392		85	334	169	309	10126	10244	9732	10625
3.48_883.77		[M+H]+		883.766	ESI pos	3.481	4557		5102		7504		10353		6052		5247		3496		4068		4685		5396		4311		2306		470	161	253	529	4371	4754	4458	4557
2.33_651.48		[M-H]-		651.48	ESI neg	2.334	10991		15725		21096		55091		20206		15520		4349		2938		5709		4864		5480		1980		14	18	na	na	9651	9630	9366	10206
4.36_659.60		[M+H]+		659.597	ESI pos	4.364	3751		4620		5852		19826		7584		4848		2489		920		1910		1244		2007		1354		482	248	255	158	3045	3192	2949	3167
2.43_1301.94		[M+H]+		1301.94	ESI pos	2.43	11239		11181		11068		10115		11892		11287		6409		4926		6865		7030		7659		2088		na	67	na	na	9932	10169	9319	9878
0.29_265.15		[M-H]-		265.149	ESI neg	0.286	32268		37683		14271		18543		23197		16590		12990		38079		18385		44886		220780		17991		15927	11482	17233	14928	35824	37470	39026	36657
3.66_598.49		[M+H]+		598.492	ESI pos	3.658	279138		295092		104358		639977		365168		276782		151211		62120		155320		89660		151012		41525		370	771	770	328	234649	248915	231522	247475
0.30_207.14		[M+H]+		207.138	ESI pos	0.302	1917		4123		2741		1684		2772		4452		3631		7940		6241		5909		4073		5056		401	297	360	402	3147	3008	3250	3022
3.94_339.29		[M+H]+		339.29	ESI pos	3.939	13363		12374		15847		22228		16534		11859		6537		5156		5920		4779		7088		2982		329	595	365	239	11183	11738	10836	11636
2.62_946.77		[M+H]+		946.769	ESI pos	2.623	3709		5989		9371		12936		5510		6730		3284		4838		5369		7868		5127		2775		193	133	75	101	5516	5433	5096	5509
3.10_955.77		[M+H]+		955.771	ESI pos	3.1	16498		27708		26546		76370		16182		13647		6135		22131		9388		13018		8138		13458		175	199	na	200	11516	11722	10757	11466
0.23_325.05		[M-H]-		325.049	ESI neg	0.235	2689		1714		3093		2350		1976		2778		2378		2352		2494		2484		2147		2180		20	86	17	25	2096	1967	2125	2133
3.25_536.44		[M+H]+		536.438	ESI pos	3.248	22680		22917		24721		4280		24126		26905		23146		34425		21414		28634		23760		24213		85	262	191	355	39421	39811	36632	39293
4.09_604.54		[M+H]+		604.539	ESI pos	4.091	197141		230015		267664		440093		260580		201284		88653		57370		88204		59278		105584		27810		320	275	638	316	161517	174376	162438	170726
1.74_594.47		[M+H]+		594.473	ESI pos	1.743	3573		4337		3747		2987		3770		4692		4443		6098		4689		5998		6162		5622		255	95	123	81	5341	5584	5112	5237
0.21_635.09		[M-H]-		635.09	ESI neg	0.208	14340		12874		12157		14401		17916		14420		13892		15786		17318		15129		15635		17087		na	2352	204	1424	17882	18977	19585	19001
0.22_435.13		[M-H]-		435.131	ESI neg	0.217	1969		2120		2397		1793		1882		2422		2519		1981		2229		2075		1931		2266		na	20	22	na	2196	2102	2231	2305
4.07_601.57		[M+H]+		601.571	ESI pos	4.074	41032		42150		51962		79641		53748		32785		14132		10660		11754		7373		15156		2792		na	126	na	103	32198	33696	30994	31249
3.25_904.76		[M+H]+		904.76	ESI pos	3.254	37193		62798		74692		231887		36277		31831		16272		52631		21416		25470		16276		26222		205	278	145	370	22871	24447	24202	25059
3.80_923.78		[M+H]+		923.78	ESI pos	3.8	121958		116974		111625		102304		112801		119107		121847		119058		119020		121724		129163		106384		1842	2265	2707	2104	123103	123372	115722	114930
4.22_986.91		[M+H]+		986.912	ESI pos	4.217	32718		33876		34383		32825		35202		31446		20304		16173		17536		12292		21462		9396		678	803	783	621	29321	31335	28703	30296
1.44_767.72		[M-H]-		767.715	ESI neg	1.436	9926		17274		14811		6152		17311		12462		7684		26981		17553		23255		18407		18144		na	na	na	na	19139	20104	18490	19937
3.88_886.78		[M+H]+		886.775	ESI pos	3.875	22551		24357		35998		75739		44089		25207		13370		4842		8974		5468		8067		3491		304	209	332	119	17302	18474	16961	18001
2.07_740.52		[M+H]+		740.522	ESI pos	2.066	8712		9749		12489		47273		15141		10501		5702		2190		5426		3639		4990		2294		213	58	263	141	9531	10400	9697	9777
2.87_947.75		[M+H]+		947.745	ESI pos	2.873	12775		23782		18620		18830		22244		18121		14801		5746		11490		6656		7405		4075		102	96	88	110	13011	14167	13187	13261
3.01_882.72		[M+H]+		882.717	ESI pos	3.01	3961		6099		5589		6531		5904		4747		5601		2803		4015		2642		3475		1802		156	180	93	106	4507	4394	4156	4528
3.66_902.72		[M+H]+		902.721	ESI pos	3.657	20021		20703		9478		17934		21138		19829		20101		16197		18832		16088		19394		10930		195	169	202	95	19944	19780	18669	20507
2.02_963.60		[M+H]+		963.602	ESI pos	2.015	2050		2666		3881		5913		3343		4107		2652		4324		3708		3534		4015		3093		145	171	63	89	3674	3699	3403	3515
2.81_887.57		[M+H]+		887.569	ESI pos	2.81	7408		9874		10096		10376		7154		7941		8956		16314		13670		15440		16124		14115		111	187	276	196	9607	9744	8903	9507
3.94_603.53		[M+H]+		603.532	ESI pos	3.943	114975		124591		168609		271101		156020		115817		65376		32435		60570		31389		65992		17726		na	561	494	288	98484	108260	101797	103458
4.09_902.81		[M+H]+		902.813	ESI pos	4.088	2549301		2758402		3067462		4407398		3186107		2397211		1117140		834559		1092421		746939		1366841		397518		1987	2412	3558	1975	2102405	2257687	2076920	2212546
3.20_890.69		[M+H]+		890.694	ESI pos	3.204	7540		11964		11444		11027		10813		10129		7571		4480		8522		5604		6299		2851		na	101	na	85	8547	8619	7983	8039
4.52_1022.96		[M+H]+		1022.96	ESI pos	4.52	3444		3624		4886		3498		3964		5194		5063		6160		6808		7897		5852		5887		733	1021	869	697	4171	4495	4226	4502
2.64_663.57		[M+H]+		663.567	ESI pos	2.643	7683		7273		8633		8847		8393		6926		4022		3883		3397		3899		4478		2460		535	214	665	506	6254	6393	6472	6864
3.65_337.27		[M+H]+		337.274	ESI pos	3.653	14279		14604		18802		28368		17574		14365		9792		3817		9011		5079		8447		3185		487	329	446	350	12726	12782	11718	12210
3.82_919.70		[M+H]+		919.705	ESI pos	3.823	26695		25916		24873		27714		26593		25965		29793		31656		27792		32152		31597		26619		605	1085	921	650	26991	26041	25685	24462
0.22_373.22		[M+H]+		373.222	ESI pos	0.218	9160		7396		8415		6749		6971		7756		12073		10792		7439		6965		8065		7510		559	502	881	1021	8347	7930	8206	7608
3.94_855.75		[M+H]+		855.745	ESI pos	3.94	49491		54244		61394		70507		59174		54485		33214		19839		32363		23024		30057		11969		221	534	419	543	45899	48508	44212	44976
4.07_601.52		[M+H]+		601.521	ESI pos	4.072	739370		732567		982047		1657445		995544		582433		249749		187300		208858		137885		270241		74735		548	1213	1369	740	546306	587197	537448	571748
4.08_875.73		[M+H]+		875.735	ESI pos	4.075	48135		36176		57639		57346		55831		43123		25243		15927		17604		7421		21534		913		191	187	146	na	42119	43110	39494	40094
4.09_941.83		[M+H]+		941.827	ESI pos	4.088	41174		43734		42085		43400		43938		41966		27888		21926		27606		19572		33492		13527		519	741	1117	545	41754	41721	38358	39658
3.79_599.51		[M+H]+		599.505	ESI pos	3.791	1708732		1915002		2025815		3066324		2102731		1751650		889405		530792		942500		759038		1009266		361620		1628	1650	1998	1222	1417487	1544893	1421123	1487955
2.88_866.67		[M+H]+		866.669	ESI pos	2.88	6179		6647		8328		5256		5847		8751		6901		10730		9797		12519		9507		11224		112	na	na	155	9101	8323	8830	9096
0.21_481.06		[M-H]-		481.065	ESI neg	0.206	79347		90123		79442		74730		76219		77941		91244		83790		89784		90411		96372		89798		na	3016	487	1792	63350	69290	69234	67739
2.87_911.73		[M+H]+		911.735	ESI pos	2.867	4293		5338		6900		9416		7189		6320		4906		2665		4413		3548		3092		1972		312	105	90	75	4493	4612	4701	4267
0.22_477.11		[M-H]-		477.105	ESI neg	0.216	946		785		903		1050		1937		1258		1674		2168		690		562		1300		776		34	126	62	132	1309	1407	1446	1382
0.21_281.11		[M+H]+		281.107	ESI pos	0.212	5838		6686		6815		5562		5577		6290		4897		7633		7367		6011		6285		8112		116	598	284	634	6462	6916	6293	6715
1.79_653.48		[M+H]+		653.476	ESI pos	1.788	4531		5801		7651		12191		6174		7279		3908		2980		5627		4915		4450		2505		158	75	69	143	4775	4545	4501	4915
3.94_881.76		[M+H]+		881.76	ESI pos	3.944	85756		87737		98438		131495		100174		74237		44464		30361		41132		29892		49012		16814		252	627	623	137	75027	76458	69357	73285
3.81_601.52		[M+H]+		601.516	ESI pos	3.805	196900		212681		282867		438072		273979		189057		114677		69155		113052		83218		117545		44641		438	578	723	518	171331	182069	166145	179294
3.36_613.48		[M+H]+		613.483	ESI pos	3.361	13991		16580		20086		28718		16985		14919		9296		5519		10454		8079		10033		3585		315	91	94	193	12541	13121	12923	13851
3.65_597.54		[M+H]+		597.541	ESI pos	3.653	38530		42464		43158		81697		49046		38922		21772		7538		21756		11595		20989		4637		97	92	93	na	34005	36572	33161	34875
3.81_573.49		[M+H]+		573.488	ESI pos	3.811	98814		105844		146264		181639		123744		105562		76139		27522		63851		34376		53398		20795		168	338	425	380	87915	94606	87036	93425
2.09_813.53		[M-H]-		813.531	ESI neg	2.087	693		1374		1874		1602		1118		1524		1079		1835		4309		3847		3638		3175		na	na	19	na	2731	2799	2669	2533
2.38_925.73		[M+H]+		925.726	ESI pos	2.385	2168		3087		3584		3144		2827		3212		4190		2850		4784		4844		3203		2129		85	76	130	182	3202	3388	3108	3382
1.79_675.53		[M+H]+		675.53	ESI pos	1.788	3210		4099		5524		9388		4234		4550		2406		2164		4939		4068		3447		2110		244	238	200	260	2995	3318	3157	3116
3.12_967.73		[M+H]+		967.735	ESI pos	3.117	4453		5045		4534		5332		5303		3768		5943		2030		3002		2408		2501		1935		na	na	138	133	4381	4837	4609	4738
3.12_732.63		[M-H]-		732.629	ESI neg	3.124	890		541		956		451		996		1178		1544		2042		1850		2356		2741		2660		169	248	216	256	1132	1110	1058	1172
3.79_600.56		[M+H]+		600.56	ESI pos	3.791	42463		44950		46339		61645		47874		43692		22483		13431		23302		18815		25732		8541		131	360	153	na	36417	39400	35786	36961
3.19_980.83		[M+H]+		980.827	ESI pos	3.195	20518		22676		22957		31835		22126		21815		15333		10562		19125		18312		20228		7155		224	154	159	288	21408	23204	21214	22518
2.87_935.74		[M+H]+		935.74	ESI pos	2.869	11753		18885		19557		18126		18015		16472		15440		9195		14978		11524		10011		5829		108	216	139	114	13638	14169	12841	13983
2.34_653.48		[M-H]-		653.477	ESI neg	2.336	3645		5314		7325		20624		6789		5559		1529		1187		1936		1521		2155		785		na	na	na	13	3270	3081	3372	3391
1.86_539.49		[M+H]+		539.494	ESI pos	1.859	2892		5204		2894		2022		3912		2378		1540		3398		3064		4060		3445		3773		750	1001	570	649	9774	10385	9369	9689
1.96_453.43		[M-H]-		453.432	ESI neg	1.96	1099		1810		1061		1194		1498		778		803		1721		298		1528		1058		900		na	16	na	na	1426	1351	1488	1373
3.81_962.68		[M+H]+		962.682	ESI pos	3.805	5138		4919		4004		3215		5700		5078		5698		5094		5545		5501		5666		4260		148	na	na	na	5522	5416	5042	5546
3.66_615.50		[M+H]+		615.502	ESI pos	3.657	8926		8974		3494		17254		10935		8196		5318		3212		5513		3941		5820		2065		193	281	442	276	7963	8526	7716	7905
3.08_951.68		[M+H]+		951.684	ESI pos	3.075	5479		8443		7359		17101		5157		5679		3341		7575		6743		7128		6208		4950		87	na	180	na	4921	5430	5345	5150
3.51_976.83		[M+H]+		976.834	ESI pos	3.511	66651		68884		78121		65591		79613		68379		59210		21891		48176		22319		35848		15239		233	243	116	106	61982	66421	60303	61135
3.43_837.65		[M+H]+		837.653	ESI pos	3.429	4189		4767		5645		4131		5511		5879		5927		7975		7886		8623		7747		8079		125	84	170	144	6115	6537	6801	6450
4.10_984.90		[M+H]+		984.896	ESI pos	4.097	38189		37355		34325		33696		35788		37628		38117		34767		36783		33188		41519		24437		666	953	714	698	39835	38688	36661	36373
0.21_483.08		[M-H]-		483.079	ESI neg	0.207	15933		14434		12811		14791		16482		14193		14179		14840		16437		15793		15084		16309		na	1431	328	1103	15019	16236	16254	16630
3.51_900.71		[M+H]+		900.706	ESI pos	3.512	15663		17656		18247		21191		19270		17878		15275		5303		11844		6152		10402		3766		132	134	116	109	15458	16369	15287	16729
3.18_851.71		[M+H]+		851.713	ESI pos	3.176	7767		10288		17587		21026		10999		11161		9528		9867		14760		13460		8544		6368		137	165	150	199	9401	10205	9362	10012
4.08_313.27		[M+H]+		313.273	ESI pos	4.076	6722		6874		8558		11619		8157		6064		3273		2145		2921		1913		3682		1463		198	159	208	134	5518	5453	5501	5980
4.28_981.87		[M+H]+		981.87	ESI pos	4.282	3224		5415		5635		12400		11001		5731		3308		1073		2055		1272		1229		1161		267	437	129	49	3284	3578	3568	3344
0.22_429.21		[M-H]-		429.214	ESI neg	0.22	1165		1547		1561		1361		1099		1672		1518		1564		1904		1450		1650		1373		28	49	37	51	1274	1360	1410	1389
3.66_978.85		[M+H]+		978.853	ESI pos	3.662	66540		60079		54898		33880		51344		62349		69145		50837		68786		59910		71470		38948		707	477	721	502	66965	63132	60564	61713
4.08_830.71		[M+H]+		830.713	ESI pos	4.084	3151		4647		3988		1809		4096		6370		6278		12884		11149		12438		8361		9239		115	144	533	124	6067	6510	5911	6374
4.21_967.73		[M+H]+		967.732	ESI pos	4.212	5541		5670		6704		5610		7312		5283		2812		2900		2840		1961		2800		1675		105	na	na	na	5242	4809	4756	4986
4.09_603.54		[M+H]+		603.535	ESI pos	4.086	527093		599703		688892		1139477		689713		527342		205004		136826		205288		138778		248117		68956		637	999	961	786	425759	463144	423171	451371
1.44_419.33		[M-H]-		419.331	ESI neg	1.437	10374		11861		11620		8941		12937		11169		9487		16671		11943		14689		13499		12153		141	193	136	269	14569	13862	13393	14742
4.01_271.24		[M+H]+		271.242	ESI pos	4.014	2535		3289		3574		2159		3381		5328		5206		6090		3600		4420		3046		5175		na	103	na	na	3740	3610	3762	4013
3.93_968.86		[M+H]+		968.864	ESI pos	3.933	16094		15740		16125		16267		16448		15405		14224		16366		15907		14869		16289		12372		943	908	646	500	17047	16228	15492	15580
3.94_601.57		[M+H]+		601.572	ESI pos	3.94	46687		47155		52600		75768		53013		41318		21906		16110		20955		15231		25909		7408		na	102	144	105	39639	42407	38068	39980
3.93_902.86		[M+H]+		902.86	ESI pos	3.934	11897		10775		13472		18403		14361		9558		5941		5342		6521		5640		6015		3266		783	867	711	486	10683	9850	10090	10823
2.22_301.00		[M-H]-		300.999	ESI neg	2.222	942		882		856		542		888		767		944		1737		1432		806		1155		1270		21	554	102	104	1771	1659	1721	1845
0.19_933.07		[M-H]-		933.067	ESI neg	0.19	11032		17966		16588		22505		16974		12110		12596		11978		22572		19524		20269		22299		na	1257	78	967	21711	20231	21800	20028
3.51_955.65		[M+H]+		955.654	ESI pos	3.511	17829		18913		22315		24896		21938		19118		15362		4628		12147		5487		9717		3474		na	na	na	142	16082	16112	15336	17116
3.51_962.82		[M+H]+		962.817	ESI pos	3.51	24584		26802		28221		24895		29707		26126		21812		10664		19098		10404		15910		7618		141	185	200	167	22464	24413	22153	23642
2.55_924.73		[M+H]+		924.729	ESI pos	2.546	12677		18361		17376		20206		14521		16384		18587		12081		23070		24307		21798		7616		96	213	273	89	20593	21691	19456	21061
2.64_944.75		[M+H]+		944.755	ESI pos	2.638	5308		8072		9301		10152		5303		7753		3496		6551		5266		7295		4705		4062		151	92	121	88	5518	5853	5422	5256
3.10_893.72		[M+H]+		893.723	ESI pos	3.101	7499		13222		12994		47345		7913		8266		4192		14413		6493		9120		6255		9305		209	153	na	190	7886	7507	7395	7059
3.96_573.49		[M+H]+		573.489	ESI pos	3.955	33452		34050		55706		71066		48367		32398		21823		10434		18744		10110		14934		5491		143	118	177	200	27968	30390	27426	29111
3.81_575.50		[M+H]+		575.504	ESI pos	3.811	107730		112457		157907		194647		131899		112320		79910		29685		68436		38819		57215		20335		51	362	641	434	93150	102639	93943	98881
3.78_902.79		[M+H]+		902.785	ESI pos	3.783	26353		25237		25780		22772		26715		27283		22279		20671		21971		21088		23874		15585		367	497	602	296	24868	27618	25577	26588
3.12_744.63		[M-H]-		744.631	ESI neg	3.119	1302		1429		1768		942		1985		3697		3323		4449		5173		6768		5735		5208		20	na	16	15	2527	2265	2369	2432
4.10_970.88		[M+H]+		970.878	ESI pos	4.096	17315		17911		17263		15666		17140		17652		15352		15745		16608		15821		19117		10600		551	858	840	669	17731	17184	19013	17383
0.22_406.24		[M+H]+		406.244	ESI pos	0.218	3665		4921		4640		3121		3606		5151		6696		4182		7072		7039		5800		5778		352	204	188	480	4350	4868	4676	4622
2.64_838.64		[M+H]+		838.639	ESI pos	2.638	3569		4049		4111		4143		4268		5195		4470		7018		5803		7044		6680		6036		70	83	70	195	4795	5139	5240	5340
3.83_933.67		[M+H]+		933.669	ESI pos	3.825	4936		4192		4957		3897		4488		4161		5274		3574		4341		3318		3792		2945		na	na	121	na	4088	4066	4170	4486
1.44_421.33		[M-H]-		421.329	ESI neg	1.437	2969		3817		3463		2764		3762		3501		2528		4409		3643		3993		4127		3674		23	64	33	116	3853	3757	4004	4175
2.64_339.29		[M+H]+		339.289	ESI pos	2.642	4227		4499		6832		13393		5256		4775		2115		1351		1625		1638		2197		1318		554	245	529	527	3367	3014	3258	3258
4.07_944.86		[M+H]+		944.863	ESI pos	4.068	12178		10992		11307		7460		10895		11809		12031		11843		10899		10000		11951		8541		586	1108	849	570	12665	11384	11653	11944
4.74_896.77		[M+H]+		896.765	ESI pos	4.74	8038		8817		9719		21235		7583		7535		4102		3567		4134		3210		4257		2756		909	2387	2972	1504	5057	5661	5428	5342
3.65_597.49		[M+H]+		597.489	ESI pos	3.655	679496		721540		382962		1593121		904163		680170		380513		139249		385530		200642		360284		98359		164	725	882	529	571754	631648	580256	612026
4.07_915.81		[M+H]+		915.814	ESI pos	4.073	24088		23853		24245		23823		24725		23114		16386		12858		13711		10200		14012		6917		278	676	512	433	20001	22008	19957	20909
4.60_1257.19		[M+H]+		1257.19	ESI pos	4.601	1950		2173		2632		1456		2419		3195		3240		3963		4438		5435		3489		3779		466	315	169	149	3017	3285	3028	3268
3.36_917.73		[M+H]+		917.729	ESI pos	3.36	106294		121249		125724		138661		134464		114728		91733		48053		77418		59747		75620		23895		104	232	267	290	101994	104244	93952	103311
4.07_577.52		[M+H]+		577.519	ESI pos	4.074	213103		211242		295083		407636		276136		183500		94164		61826		73174		47361		80708		23742		576	858	802	790	155663	167581	151562	164507
3.43_937.75		[M+H]+		937.747	ESI pos	3.43	6815		10470		11804		36470		6977		5485		3096		9473		4992		4225		4290		5132		140	105	104	na	5503	5339	4963	5081
2.69_906.72		[M+H]+		906.718	ESI pos	2.692	5713		13559		15615		13921		15536		11473		12541		7659		12526		6995		4996		4517		181	135	89	316	7644	8222	7599	8305
3.94_873.71		[M+H]+		873.713	ESI pos	3.938	70351		74553		68643		92864		81036		64052		48690		35502		51692		38180		50012		11288		118	297	121	135	68181	71982	65095	65462
3.79_879.75		[M+H]+		879.746	ESI pos	3.794	153965		166468		178810		244765		181810		160320		97641		61886		97040		79552		106008		41705		263	261	414	260	133437	146519	133678	142539
4.21_906.83		[M+H]+		906.83	ESI pos	4.213	38759		41395		56266		89557		53858		33408		13015		10616		11507		6123		15609		4711		553	411	601	421	30487	32323	29262	32185
3.19_995.76		[M+H]+		995.759	ESI pos	3.193	5064		3167		2634		5927		2895		2488		3062		3613		2041		2720		2358		1567		194	99	209	221	3918	3877	3648	4093
4.07_339.29		[M+H]+		339.289	ESI pos	4.073	17166		16320		21230		33801		20654		14063		6852		5914		6551		3735		7067		2320		747	307	432	440	12789	13636	12452	13701
3.20_994.84		[M+H]+		994.843	ESI pos	3.196	105878		120713		120431		161474		117239		113538		76141		58262		102425		100146		111163		38165		35	336	277	140	113504	119273	108365	120007
3.81_597.49		[M+H]+		597.488	ESI pos	3.811	225600		225002		355819		483685		304091		210774		140223		67152		126232		71022		113209		40433		319	598	492	246	187746	201133	182465	199868
3.64_271.24		[M+H]+		271.242	ESI pos	3.644	1961		2465		2822		492		2120		3133		3278		5482		3015		4086		2282		4435		na	na	na	113	2900	3175	3058	3233
0.21_433.04		[M-H]-		433.043	ESI neg	0.209	78491		85169		85271		71407		90798		95176		93926		96218		103651		101251		109920		107790		411	15531	6277	13858	78243	72207	79050	72696
3.83_918.81		[M+H]+		918.814	ESI pos	3.83	4624		6086		6517		6627		5444		6047		5123		3028		3872		4370		5799		2479		373	461	409	774	4943	4838	4424	4686
3.97_922.72		[M+H]+		922.72	ESI pos	3.974	6918		7433		7160		7154		7728		6660		7261		8196		6216		6500		7344		4883		109	55	103	na	7586	7315	6758	7258
0.20_954.12		[M+H]+		954.122	ESI pos	0.201	12020		10349		9490		8362		13934		11943		10806		14036		9423		9140		8227		10036		107	577	1120	1272	13772	13571	13653	12401
3.13_968.74		[M+H]+		968.74	ESI pos	3.127	4775		4808		4099		4344		4666		3788		5015		1014		2053		3005		2173		1347		131	115	163	na	3575	3693	3777	4002
2.90_934.72		[M+H]+		934.723	ESI pos	2.903	24157		22512		27095		23622		38062		22293		29529		11793		24214		11444		7193		8251		253	na	93	83	25561	24164	26360	27052
3.35_895.74		[M+H]+		895.738	ESI pos	3.353	22748		32868		34435		54932		40601		28884		19197		28024		19794		21852		15785		15824		126	230	420	170	23397	23693	22003	24741
2.87_927.65		[M+H]+		927.648	ESI pos	2.873	10696		20092		15285		12174		17685		14597		13221		4112		11207		6472		6540		2594		105	na	92	na	10637	11917	11006	11267
3.48_922.76		[M+H]+		922.755	ESI pos	3.485	10169		9785		13179		14798		11373		10556		7030		7634		9325		8379		9087		4728		110	109	361	115	9202	9787	8917	8796
2.89_871.57		[M+H]+		871.574	ESI pos	2.893	17900		24349		22459		38562		17756		22565		21523		27307		21720		26516		31834		21973		na	901	1227	1087	23554	24599	23948	26246
3.97_940.82		[M+H]+		940.82	ESI pos	3.972	32125		29317		31935		33205		32865		29727		26045		26922		24788		22934		30484		16565		599	842	850	659	29772	31073	28037	28279
4.20_944.85		[M+H]+		944.851	ESI pos	4.202	20822		22225		23986		27234		24537		21917		12982		17292		16278		19055		17526		10565		126	471	277	433	19665	20825	18527	19414
4.08_629.55		[M+H]+		629.55	ESI pos	4.084	22602		24461		28416		50698		32616		27676		12468		7185		10296		8827		9960		4614		449	447	199	367	19223	21619	20335	20202
2.97_947.68		[M+H]+		947.676	ESI pos	2.969	6297		11557		13012		39054		7040		6359		4249		8568		4962		4185		4055		5456		na	na	120	109	5749	6082	5444	5575
0.24_133.01		[M-H]-		133.014	ESI neg	0.24	8196		2714		10158		13421		3573		4488		6007		3890		2319		1640		2126		2165		28	77	9	26	3706	3456	3707	3892
0.23_453.05		[M-H]-		453.047	ESI neg	0.229	4031		5753		5114		4747		4292		5212		6666		5911		8146		7335		7230		7526		15	84	6	911	3741	3548	3358	3410
3.36_960.80		[M+H]+		960.802	ESI pos	3.359	9207		15327		13524		18844		20118		14444		10409		4449		6563		2998		3263		2598		99	109	90	175	9540	9474	8946	10082
3.67_952.83		[M+H]+		952.829	ESI pos	3.672	6899		8626		9025		6902		8522		8008		8451		5211		6904		4783		5251		3624		298	258	476	271	7368	6711	6716	7230
0.21_160.08		[M+H]+		160.076	ESI pos	0.206	67774		95483		74610		86101		42644		67170		83828		84432		72890		75761		85219		72059		864	1094	1324	2603	77910	73231	69560	71322
3.94_913.80		[M+H]+		913.797	ESI pos	3.936	33992		32272		31690		24888		31940		36050		35199		25176		33725		30529		31092		18271		739	660	859	399	33243	35062	31149	32521
2.16_649.46		[M-H]-		649.463	ESI neg	2.16	3733		4021		7819		13719		5805		5680		2291		960		2858		1738		2639		780		na	na	na	na	3611	3257	3531	3645
3.78_966.85		[M+H]+		966.849	ESI pos	3.778	19462		18202		17332		13581		17989		18654		22515		25424		21983		25598		24067		21825		244	837	1019	656	21743	19647	20800	19600
3.93_956.86		[M+H]+		956.864	ESI pos	3.93	18280		17844		15922		10087		15819		19385		30417		27113		28209		33187		26255		25479		767	1034	905	1080	20909	21293	21438	19178
3.79_617.51		[M+H]+		617.513	ESI pos	3.792	11067		12147		12423		17028		12505		10531		6400		4790		6375		6272		7314		2949		115	128	305	203	8927	10064	9626	9784
2.87_936.75		[M+H]+		936.745	ESI pos	2.868	4915		7726		8948		9682		7314		7132		6438		4837		7411		6196		4663		3324		192	259	94	na	5405	5974	5362	5513
2.62_575.50		[M+H]+		575.502	ESI pos	2.624	5718		7250		10273		16559		8893		7143		3363		2482		3588		3246		3017		2034		408	483	468	540	4817	5253	5409	5028
3.51_893.11		[M+H]+		893.112	ESI pos	3.513	7179		9005		10520		42835		44195		7582		3772		1519		4140		1149		2355		595		na	na	na	na	6749	6958	6606	7409
3.04_682.63		[M+H]+		682.635	ESI pos	3.036	5937		5607		6973		4953		7858		10861		10658		11654		17418		17064		15192		16744		821	870	961	808	7573	8464	7668	7951
0.22_425.18		[M-H]-		425.18	ESI neg	0.222	1184		1252		1048		1015		990		1424		2051		1265		1198		787		878		679		na	na	na	17	1060	1012	1114	1133
0.22_303.05		[M-H]-		303.052	ESI neg	0.219	1418		1069		3416		1372		1635		2705		2370		2335		2009		1534		1589		1645		45	52	107	44	1914	2151	2117	2063
3.51_897.75		[M+H]+		897.752	ESI pos	3.512	38471		43861		48699		65253		51438		42458		33614		21515		27668		20355		23883		13019		240	553	281	243	37091	39700	35072	37332
0.23_149.10		[M+H]+		149.096	ESI pos	0.229	5415		9530		6064		5108		6075		8994		5711		10962		8204		7048		6968		5317		591	728	1020	971	5993	6367	5964	6626
3.09_1012.85		[M+H]+		1012.85	ESI pos	3.094	10127		18037		17603		54094		10787		10226		4272		15975		7682		9387		5521		9167		222	170	222	194	7409	8241	7555	7446
3.28_893.72		[M+H]+		893.722	ESI pos	3.283	14958		17392		24249		30292		17435		20172		13314		17756		20387		26493		14888		11381		190	104	82	103	15099	17067	16115	16466
2.51_987.75		[M-H]-		987.75	ESI neg	2.509	760		1213		1664		1993		1109		1224		550		936		918		1814		1401		475		na	na	na	14	1276	1129	1204	1179
2.19_337.27		[M+H]+		337.274	ESI pos	2.194	1396		1903		3006		2571		1864		3089		2231		3926		3726		4398		3859		3951		371	606	316	615	3123	3536	3349	3288
0.17_469.01		[M-H]-		469.013	ESI neg	0.174	22889		14986		22419		15053		20673		18443		16765		11347		11527		12697		10706		12001		na	1953	377	1596	26014	23303	26058	24956
1.34_369.34		[M-H]-		369.34	ESI neg	1.345	41319		61006		49179		31332		55210		63271		37157		86418		98137		107962		104089		93537		338	589	476	709	93255	85034	96161	92173
4.28_831.72		[M+H]+		831.715	ESI pos	4.282	5596		8326		5405		2311		5127		7024		7587		20264		13428		23511		14517		16444		128	142	na	294	11775	11798	10755	10790
0.19_935.08		[M-H]-		935.081	ESI neg	0.191	16604		12889		14588		12921		19462		15710		11634		13495		11917		10141		8724		12098		na	595	57	358	19119	17599	18997	17268
3.97_597.49		[M+H]+		597.488	ESI pos	3.974	59810		76381		101984		155229		92661		79339		41713		14032		39619		19227		35769		9994		122	119	311	172	54472	60993	56244	59724
4.09_831.72		[M+H]+		831.717	ESI pos	4.087	1661		2770		1600		708		1417		3301		3066		7273		4115		6705		4641		4540		317	225	422	167	3063	3439	3160	3118
3.43_295.23		[M+H]+		295.227	ESI pos	3.429	5972		6611		8021		5300		8001		8394		7523		13442		13072		18373		12146		14856		753	571	1010	577	7257	7133	7283	7991
4.07_575.50		[M+H]+		575.504	ESI pos	4.074	239022		258609		337815		474917		315499		217242		113378		68395		94667		60010		95732		30463		700	706	855	765	176586	195255	174616	187121
0.22_377.09		[M-H]-		377.086	ESI neg	0.222	2425		1767		1994		9745		2839		1633		1910		670		724		430		556		487		54	57	50	30	1142	1236	1256	1295
0.20_952.10		[M+H]+		952.104	ESI pos	0.2	6395		10262		8126		11623		8714		7005		8558		9007		12927		12208		12925		13536		227	509	1168	1748	11477	10989	10747	10102
3.37_601.52		[M+H]+		601.52	ESI pos	3.365	12723		15164		17758		30178		15932		12497		6785		5402		7962		6831		9400		2214		116	243	202	324	11320	12482	11460	12476
3.04_978.81		[M+H]+		978.812	ESI pos	3.036	12108		15508		15369		19643		15735		14073		10864		5886		12546		8967		10411		3975		384	146	99	76	11733	12631	11814	13080
2.85_873.70		[M+H]+		873.697	ESI pos	2.854	9933		14977		24550		33539		17985		16643		17150		11092		20672		14785		10642		8422		241	138	79	336	13281	14269	12904	14370
4.08_901.14		[M+H]+		901.142	ESI pos	4.081	23333		20328		4460		58950		24984		12681		4488		3944		6925		7818		7506		2956		na	na	na	na	13451	12932	12112	13666
3.39_918.74		[M+H]+		918.739	ESI pos	3.389	72265		85590		82237		93781		91283		78706		60771		20940		49022		17759		18282		8261		201	170	114	575	65928	66449	60414	68572
3.51_335.26		[M+H]+		335.258	ESI pos	3.51	4664		5955		7252		15316		8324		5332		4542		1286		3176		1615		2024		1008		214	176	137	282	4084	4625	4512	4361
3.19_931.68		[M+H]+		931.678	ESI pos	3.195	39854		48486		48453		61067		43037		44721		28552		18230		37620		35060		41937		12247		99	213	na	na	44617	46432	41282	46273
4.22_966.74		[M+H]+		966.737	ESI pos	4.217	7893		7340		8063		8068		9168		6567		4499		3806		3455		2517		4385		2595		na	106	na	105	6729	7105	6402	7206
0.22_193.16		[M+H]+		193.159	ESI pos	0.223	17771		20254		19456		16139		14106		20050		24348		24524		18371		15756		18899		14988		4053	2041	4355	1848	17132	18891	17455	16725
1.41_413.37		[M-H]-		413.365	ESI neg	1.41	2031		4415		2928		1976		2638		2936		1845		5529		5046		7402		6099		5671		na	na	na	16	8990	9652	8896	9931
3.78_980.87		[M+H]+		980.866	ESI pos	3.779	44730		42273		42048		29533		43975		41100		55097		62619		53241		61836		58924		53438		963	1068	1488	983	50051	44174	46992	45521
3.63_936.79		[M+H]+		936.787	ESI pos	3.633	63272		52854		24996		50913		61285		60435		51585		27128		48803		33619		49921		22406		422	604	596	531	57829	59228	52172	56391
0.21_615.11		[M-H]-		615.107	ESI neg	0.215	1499		1622		1413		1492		1643		1515		1968		1520		1304		1355		1380		1266		na	113	17	85	1798	2053	1928	1914
4.08_829.71		[M+H]+		829.708	ESI pos	4.085	3411		4622		6214		2040		3416		7652		5445		14748		10355		13530		8313		8914		437	181	429	556	6430	7226	6506	6874
0.22_567.17		[M-H]-		567.174	ESI neg	0.219	14759		18116		16510		16634		15380		16010		20295		14666		14861		14603		11639		12704		na	267	71	259	15643	15753	16648	17550
3.51_919.75		[M+H]+		919.75	ESI pos	3.511	129067		131108		141911		144602		145711		130990		120848		70871		109486		74270		104869		47739		347	558	676	382	121208	128053	115655	130481
3.35_889.77		[M+H]+		889.768	ESI pos	3.346	23191		27334		33011		49036		28654		24570		15960		12949		18256		17105		15755		6620		391	181	191	310	21394	22097	20339	23163
0.20_802.11		[M+H]+		802.109	ESI pos	0.201	30378		31779		28621		31129		31505		28014		31355		34062		35722		36494		38085		35953		435	1812	1631	2953	36615	33479	35749	32561
2.19_939.60		[M+H]+		939.603	ESI pos	2.192	4008		5497		9648		8980		5641		10656		7031		13676		12749		13796		14807		14328		177	na	na	88	10492	11061	11300	11978
3.81_853.73		[M+H]+		853.729	ESI pos	3.811	28751		29334		44047		47857		34464		29690		23180		10718		19151		12114		16759		6892		141	378	416	421	26808	28115	24715	25813
0.23_405.17		[M-H]-		405.169	ESI neg	0.225	915		1079		1012		904		792		938		1053		872		1385		1008		1026		1052		13	26	13	16	1011	985	1114	1064
3.50_871.74		[M+H]+		871.74	ESI pos	3.503	4336		4051		4949		6042		4774		4315		2965		5769		4258		4749		4164		3194		412	332	245	301	4516	4077	4513	4130
2.87_871.68		[M+H]+		871.681	ESI pos	2.87	3772		8005		5313		5414		6965		4842		4427		2022		3584		2457		1873		1426		142	199	206	na	3811	3893	3563	4075
0.22_537.20		[M-H]-		537.198	ESI neg	0.218	1904		2220		1951		1516		1609		1851		2209		2566		1745		1425		1846		1493		na	52	na	22	2044	2014	2276	2118
0.18_425.02		[M-H]-		425.018	ESI neg	0.176	12047		8096		11296		6925		9383		9574		8578		5250		5947		5930		4799		5495		na	1209	244	834	11063	10343	11765	10696
2.87_990.81		[M+H]+		990.813	ESI pos	2.874	20764		42955		33379		25500		40495		32523		28128		10586		21893		13231		11992		6943		129	154	85	130	22749	25476	22652	23928
1.22_385.33		[M-H]-		385.333	ESI neg	1.223	909		1595		866		671		910		1038		523		1677		1584		2480		2707		2039		na	na	na	13	3633	3280	3736	3502
0.23_125.02		[M-H]-		125.024	ESI neg	0.227	3056		2838		2418		1985		2996		3062		2646		3552		2810		2674		2392		2724		94	281	108	196	5302	5731	5221	5839
3.75_678.67		[M+H]+		678.674	ESI pos	3.745	2617		2519		2337		1735		3393		2848		3586		3033		4990		8505		4763		5849		856	862	1054	940	3120	3159	3019	3434
2.02_784.57		[M+H]+		784.574	ESI pos	2.019	12549		15712		20100		91127		24950		14441		8107		3443		8547		5533		6180		2573		65	289	323	123	12559	14365	13235	13331
0.22_211.17		[M+H]+		211.17	ESI pos	0.222	40052		45888		39798		35031		32729		50172		59949		56470		43320		36135		42267		34463		6014	2722	5424	3100	37574	42310	37908	38622
0.20_787.10		[M-H]-		787.101	ESI neg	0.205	10985		7152		9863		13766		16710		11490		10200		14567		14845		11698		13955		14185		na	1755	48	1135	15608	15786	17479	15659
2.66_929.76		[M+H]+		929.762	ESI pos	2.657	4677		4519		6252		8832		4606		4660		3243		3875		4276		6495		4726		2493		247	103	193	233	4435	5028	4817	4982
3.85_953.83		[M+H]+		953.833	ESI pos	3.847	5561		5468		5424		5521		5677		5771		4253		3398		4203		3187		4825		2519		381	337	332	345	5481	5398	4904	4980
2.79_690.58		[M-H]-		690.582	ESI neg	2.786	1251		983		1039		629		1299		1530		1757		2573		2827		3563		4180		3804		137	111	86	133	1670	1683	1727	1515
1.44_337.35		[M-H]-		337.349	ESI neg	1.436	1270		1914		1698		1072		1945		1363		1051		2200		1822		1995		1852		2015		na	21	na	29	1779	1965	2019	1995
0.23_271.06		[M-H]-		271.062	ESI neg	0.226	2608		3136		2812		1505		1979		3311		3058		2626		3045		2795		1853		2728		49	57	46	57	2995	3311	3313	3420
4.21_339.29		[M+H]+		339.29	ESI pos	4.208	9689		8636		12913		24586		13338		6631		2935		2149		2182		1517		2992		1157		527	464	492	476	6442	7343	6653	6832
0.22_445.21		[M-H]-		445.209	ESI neg	0.218	1950		3041		2264		2045		1695		2747		2808		2982		2881		1952		2237		1807		79	34	73	98	2112	2299	2332	2419
1.78_613.48		[M+H]+		613.482	ESI pos	1.785	2316		3565		5082		7453		4158		4699		2947		3131		4872		4536		3575		2909		290	139	na	185	3477	3468	3153	3609
2.98_1010.84		[M+H]+		1010.84	ESI pos	2.976	4848		7229		9995		34392		5629		4729		3494		8281		4528		5882		3548		4934		321	127	124	155	4389	4861	4723	4325
0.89_413.29		[M-H]-		413.292	ESI neg	0.894	888		1670		2568		2983		1510		2856		1038		1235		1362		2270		1560		848		na	na	na	na	1469	1570	1485	1659
3.36_974.82		[M+H]+		974.818	ESI pos	3.358	21813		38512		36025		49905		51845		30636		23841		7443		14708		5479		6375		4452		311	276	104	101	21172	23264	20881	23104
3.24_918.72		[M+H]+		918.723	ESI pos	3.24	9839		12949		13620		32780		14185		11941		5310		4616		5819		6018		5993		2308		161	101	253	na	8606	8768	8398	9545
2.73_878.65		[M-H]-		878.653	ESI neg	2.735	11986		16484		19696		17842		15626		19097		15308		28643		28333		25890		29197		25108		na	28	26	68	23383	21755	24985	23734
4.22_885.79		[M+H]+		885.791	ESI pos	4.216	9489		10266		13643		24015		12777		8142		3915		2443		3905		2461		4016		1839		406	506	468	477	7284	7761	6752	7255
4.59_841.71		[M+H]+		841.707	ESI pos	4.595	2052		3560		2398		1302		1778		2791		2376		4602		4018		4838		3012		3675		na	na	143	325	3807	3375	3393	3583
3.65_938.81		[M+H]+		938.807	ESI pos	3.655	7647		8427		3946		5561		8526		7990		7753		5556		7260		5567		7481		4764		169	317	134	337	8506	8041	7562	7566
2.19_760.57		[M+H]+		760.574	ESI pos	2.192	24951		39614		40794		122611		45484		31173		17416		7585		22431		14656		15945		11564		383	390	502	436	31926	35961	35327	36221
3.10_969.79		[M+H]+		969.786	ESI pos	3.104	5107		8692		9248		30601		5013		4478		2857		7495		3409		3966		3018		4258		184	179	83	83	4424	3964	3927	3993
0.30_149.10		[M+H]+		149.096	ESI pos	0.302	3231		8650		5400		2124		5112		8276		5647		13853		10673		10232		7886		9568		632	460	308	556	5451	4756	5021	4998
3.19_915.71		[M+H]+		915.705	ESI pos	3.195	151018		177144		180655		236908		163289		166886		104796		71552		134464		127909		152233		45002		207	457	333	166	154143	165497	150080	169366
3.52_972.86		[M+H]+		972.861	ESI pos	3.516	8459		8835		9564		5435		6493		7900		6351		7118		7379		8055		8158		4058		823	609	511	448	7794	8466	7438	8230
3.19_937.76		[M+H]+		937.761	ESI pos	3.195	109649		121864		121938		129960		114188		117787		82740		59222		100429		98070		107697		37679		206	204	168	196	112604	120118	106576	120235
4.61_1376.21		[M+H]+		1376.21	ESI pos	4.606	2037		3066		2159		915		2038		3053		2552		4789		3484		4701		2475		3461		na	na	121	123	3554	3265	3092	3311
3.43_792.72		[M+H]+		792.723	ESI pos	3.43	13533		13398		20611		10508		17520		20084		18694		32088		30213		43085		27003		35869		279	232	308	231	15730	16450	15294	17445
3.57_880.74		[M+H]+		880.74	ESI pos	3.57	24286		24106		35470		105301		42241		25931		14775		4727		11596		6791		10377		3139		137	322	429	na	19440	20230	20775	18153
2.72_732.60		[M-H]-		732.596	ESI neg	2.716	3398		5720		3721		2127		3626		3924		4149		6724		7312		10835		13454		12536		23	na	13	14	9572	8438	9335	8742
1.97_575.50		[M+H]+		575.504	ESI pos	1.969	16034		18888		19061		58905		24294		15222		9427		5807		8697		6337		9130		4578		411	502	486	479	13154	14976	13415	13814
2.08_467.45		[M-H]-		467.447	ESI neg	2.083	802		1742		1134		1379		1588		723		712		1529		291		1486		909		926		13	na	na	13	1430	1327	1520	1482
1.75_615.42		[M-H]-		615.423	ESI neg	1.75	739		899		649		428		608		936		742		1290		1020		1175		1344		1102		na	na	na	na	1086	956	1069	1005
4.08_551.50		[M+H]+		551.504	ESI pos	4.077	19810		21113		26873		32898		24645		21891		13755		6357		10225		6876		9084		3794		514	325	567	595	16149	17764	15772	17474
1.60_599.39		[M-H]-		599.393	ESI neg	1.598	742		861		849		670		795		1042		861		1612		988		1246		1255		1160		na	na	na	na	1125	1098	1061	982
0.24_392.24		[M+H]+		392.243	ESI pos	0.241	10180		9092		12643		7876		10782		12456		12105		17418		19912		22351		14535		25999		455	2106	3699	1042	12236	12455	11688	13428
2.08_630.51		[M+H]+		630.509	ESI pos	2.082	6528		10989		14255		27219		17275		13119		6888		2233		6240		3029		3683		1921		214	299	367	247	6637	6518	6381	7271
0.22_393.05		[M-H]-		393.048	ESI neg	0.219	1209		985		1038		1307		1566		1184		1158		1325		1445		1252		1021		1518		na	41	26	19	1434	1509	1542	1651
1.07_584.42		[M+H]+		584.422	ESI pos	1.072	2807		4293		5281		3464		3799		4531		5262		6127		6528		6951		6908		6831		139	135	61	75	6392	6493	5693	6377
0.22_421.17		[M-H]-		421.165	ESI neg	0.222	3758		5028		4013		3635		3184		4243		5265		4101		4805		2608		3641		2799		13	13	na	42	3405	3668	3895	3834
0.21_466.04		[M-H]-		466.037	ESI neg	0.207	3771		7396		5602		7508		6005		4771		5385		5240		9667		8518		7388		8915		na	860	92	849	6253	7143	7077	6850
3.87_912.79		[M+H]+		912.788	ESI pos	3.869	13758		13850		19711		38512		21123		14629		8222		3586		7098		4797		7495		2531		209	393	293	308	11864	12649	11153	12637
0.43_316.28		[M+H]+		316.285	ESI pos	0.427	12146		18404		13529		11523		19834		18527		16824		24457		36579		35768		32398		30759		246	401	545	373	20771	23125	20185	21444
1.44_431.35		[M-H]-		431.352	ESI neg	1.437	3707		4238		4575		3183		5065		4190		3684		5471		5081		4685		5307		5158		69	127	67	81	5473	4925	5090	4770
3.29_941.79		[M+H]+		941.79	ESI pos	3.295	10771		12823		16450		23221		13856		12269		6756		11101		9623		12620		9061		5276		236	290	281	185	9659	10378	9874	11037
0.20_1122.12		[M+H]+		1122.12	ESI pos	0.195	6870		5945		6516		6749		7481		5767		6992		7521		5751		4702		7116		6000		na	328	679	1024	6230	5689	5428	5617
3.36_933.70		[M+H]+		933.695	ESI pos	3.361	20812		18711		21574		23763		17155		18012		11747		10049		15007		13513		18655		5488		91	211	117	na	18741	18879	16961	19568
3.26_909.72		[M+H]+		909.716	ESI pos	3.256	10056		16739		19118		49872		10945		9392		5264		15520		6999		7258		4820		7940		167	na	189	88	7991	7743	7783	8783
2.33_279.23		[M-H]-		279.234	ESI neg	2.333	1586		1934		1958		3202		1600		2054		1041		1006		1143		1005		1124		558		38	245	101	110	1345	1385	1519	1339
0.30_315.25		[M-H]-		315.255	ESI neg	0.298	746		724		1243		612		852		1442		1290		2011		1594		2492		1931		1965		48	59	62	61	1392	1433	1296	1260
2.97_931.70		[M+H]+		931.7	ESI pos	2.972	15908		24660		35889		116105		17943		16388		10246		22738		15236		14788		11359		14739		117	119	86	73	13339	15139	14103	15102
4.07_575.55		[M+H]+		575.555	ESI pos	4.073	13412		14380		19288		26772		18111		12058		6044		2550		3839		2032		4382		1234		126	156	106	137	10147	11137	9673	10597
3.51_897.85		[M+H]+		897.851	ESI pos	3.511	9932		13356		13432		6489		15657		11356		8680		850		7079		829		1449		1296		940	849	640	815	9987	10029	9307	10787
2.54_674.55		[M-H]-		674.552	ESI neg	2.54	1276		1250		2176		2085		2396		4297		2302		2927		6706		8319		8859		6258		na	na	na	na	2171	2288	2055	2360
2.83_929.68		[M+H]+		929.683	ESI pos	2.827	6587		10845		15257		49769		9366		7342		5462		8693		7424		5169		4569		5798		na	150	313	125	5868	6126	5742	6573
3.29_920.74		[M+H]+		920.742	ESI pos	3.292	13065		13477		18650		29095		16711		13163		9228		12855		11499		13788		10222		5682		na	225	111	241	11321	11379	10965	12572
4.08_901.17		[M+H]+		901.17	ESI pos	4.085	36585		33650		40902		34674		39514		11412		6189		5689		4653		2864		7799		1854		na	na	na	na	12511	13498	12106	11749
0.22_450.99		[M-H]-		450.995	ESI neg	0.219	1866		2540		2319		2347		3012		2853		2743		3881		4348		4289		4803		4754		na	49	18	152	3104	2768	2851	2712
3.36_893.73		[M+H]+		893.731	ESI pos	3.36	64615		127940		123450		206401		189357		101516		65273		16676		37452		16022		17971		9679		179	118	116	214	63229	64937	59752	69155
4.39_1211.01		[M+H]+		1211.01	ESI pos	4.391	9005		9968		11092		6441		8716		12594		10980		13978		15656		19274		14415		16162		na	na	na	164	14286	15763	13951	15565
3.95_942.85		[M+H]+		942.848	ESI pos	3.953	12782		12148		12169		2456		11914		11280		16580		14650		15434		16580		15298		13152		645	504	683	723	13329	13064	13017	11608
3.94_954.85		[M+H]+		954.85	ESI pos	3.939	6639		6719		4029		3217		7271		6555		7980		6619		6455		6865		7721		6075		527	523	461	451	6396	7258	6396	6640
3.04_992.83		[M+H]+		992.827	ESI pos	3.036	58746		74792		79767		99898		75744		66765		56152		27528		62376		42486		52109		17488		303	249	258	236	57871	66985	60973	62712
1.84_439.42		[M-H]-		439.419	ESI neg	1.844	14971		18466		14614		22794		26211		10434		9902		23107		5481		22877		18269		13645		58	91	54	99	18714	19819	17128	19163
3.19_910.81		[M+H]+		910.812	ESI pos	3.185	59281		69438		67329		104905		64175		64817		39266		12390		47109		46306		57702		13365		694	605	599	235	61855	67389	58117	63456
2.64_654.60		[M+H]+		654.604	ESI pos	2.637	3272		3692		3703		4111		3312		3865		3461		4897		4527		5260		4551		3851		494	506	382	542	3910	4525	4302	4374
3.46_708.66		[M-H]-		708.661	ESI neg	3.465	733		1020		1083		465		2730		1118		1436		1094		4626		4514		3655		2611		na	na	na	na	1622	1456	1682	1555
4.46_998.91		[M+H]+		998.911	ESI pos	4.461	13517		14231		21992		59106		30839		18890		15285		4396		8838		1610		4594		3497		736	1182	900	509	13808	14135	12453	12726
4.18_815.69		[M+H]+		815.689	ESI pos	4.182	1597		1739		1193		526		1266		2038		2406		5224		4571		6972		5523		6296		336	116	174	121	2775	2829	2513	2529
0.23_407.19		[M-H]-		407.192	ESI neg	0.226	10920		11595		9205		6914		6692		8928		13076		8523		7811		5971		6017		5856		60	36	39	85	7728	8342	8656	8936
3.67_851.72		[M+H]+		851.718	ESI pos	3.669	7152		11153		8604		14903		13859		8289		6321		2841		5654		2506		3819		1281		169	113	208	297	7612	7119	6561	7294
0.22_317.20		[M-H]-		317.198	ESI neg	0.218	544		1548		1588		516		1482		1517		1438		829		2503		3109		1842		2932		na	16	26	40	1105	1211	1055	1176
3.92_969.86		[M+H]+		969.864	ESI pos	3.915	9081		7784		7546		6680		7837		7972		10362		11641		9980		9470		11559		8746		493	525	605	790	9130	8495	9221	8083
2.20_863.57		[M+H]+		863.565	ESI pos	2.202	3300		6656		4423		10330		6009		4112		2608		1656		2770		1553		2186		1561		62	95	74	na	4642	4582	5010	5212
3.65_951.82		[M+H]+		951.819	ESI pos	3.655	6509		5775		3273		4119		6743		6513		6467		4650		6483		4948		5994		4021		216	158	209	251	6740	6617	6053	7028
4.45_932.93		[M+H]+		932.927	ESI pos	4.446	11677		10386		19445		43148		12956		12651		7763		3342		2674		3675		4192		4027		2181	1808	1669	2037	9207	9481	8282	9458
3.81_261.22		[M+H]+		261.221	ESI pos	3.809	13416		11865		16363		23052		14899		11816		9411		4302		7514		4067		7689		3112		98	172	133	94	10243	10815	9771	11263
3.54_984.86		[M+H]+		984.86	ESI pos	3.541	4560		5200		4250		5574		3586		4140		3641		3515		3908		3860		4624		1705		574	264	672	441	4156	4695	4220	4622
2.50_627.48		[M-H]-		627.479	ESI neg	2.504	1506		2206		2913		5653		2013		1856		826		673		937		682		872		467		na	na	na	na	1572	1393	1605	1564
3.35_812.65		[M+H]+		812.654	ESI pos	3.354	2817		3291		3529		1619		3081		5009		3893		7164		5591		8075		5502		7264		94	171	193	113	4739	5023	4497	5178
0.21_459.22		[M+H]+		459.223	ESI pos	0.215	13905		12438		14995		13778		14546		16796		18244		19287		16533		15335		24203		15467		508	621	1063	1148	13099	11519	11523	12314
2.02_415.36		[M+H]+		415.357	ESI pos	2.018	13660		14275		12617		8769		13293		12609		14195		17373		13219		15951		14076		13016		597	725	690	303	15104	13279	13532	13354
2.10_977.60		[M-H]-		977.598	ESI neg	2.104	287		558		1177		728		497		1173		554		1831		1492		1349		1720		1285		14	na	na	na	1316	1147	1244	1171
3.36_996.86		[M+H]+		996.86	ESI pos	3.361	52131		47776		54472		64419		44141		44894		28793		31411		36890		37002		47709		15632		270	539	505	503	46483	49824	43081	48590
4.22_601.52		[M+H]+		601.52	ESI pos	4.219	107926		122285		159125		326584		145574		102086		31587		19726		28314		14664		37331		8862		489	602	283	573	77815	87602	77824	85744
0.24_353.23		[M+H]+		353.23	ESI pos	0.239	2084		1615		4644		2445		3485		6607		3861		6712		4788		7298		5434		4283		347	329	276	248	3223	3641	3388	3173
2.39_922.71		[M+H]+		922.713	ESI pos	2.387	6532		16438		10998		7234		10882		12048		12962		7147		13925		11611		8562		4156		244	90	na	277	11744	13115	11371	11881
1.63_449.36		[M-H]-		449.358	ESI neg	1.63	3056		3566		3392		3049		3520		2903		3119		4647		2783		4011		3924		3499		13	49	na	25	3962	3771	3743	4281
4.64_857.74		[M+H]+		857.739	ESI pos	4.64	210572		350663		292538		136528		141606		280522		267013		327381		462562		550616		356416		477244		816	1657	1645	1685	361454	388272	332685	360709
3.38_890.78		[M+H]+		890.781	ESI pos	3.38	69828		134928		134853		110064		81169		103641		67530		19236		42084		11886		19922		9521		448	484	396	358	67658	68684	60308	69346
3.36_873.70		[M+H]+		873.697	ESI pos	3.357	12956		26148		23543		42862		37569		18541		12496		3010		7162		2251		3266		2135		133	98	na	113	11650	12169	10809	12519
2.02_416.36		[M+H]+		416.365	ESI pos	2.015	64749		75418		72044		58109		92928		79031		69912		95020		73518		89026		79463		68268		731	837	802	466	83438	78799	72734	74018
3.19_893.72		[M+H]+		893.722	ESI pos	3.191	20186		23012		26298		42487		21259		23636		16074		47047		30525		50735		28968		34838		392	251	242	330	24304	26662	24261	27419
4.07_876.85		[M+H]+		876.854	ESI pos	4.071	70668		70039		92733		112157		88677		61424		35958		28884		31374		17818		26499		7951		771	490	423	849	57733	61641	53640	54637
1.44_430.36		[M-H]-		430.357	ESI neg	1.436	1014		934		1218		751		1114		1043		938		1432		1242		1203		1357		1192		14	15	36	35	1350	1159	1290	1251
3.04_935.75		[M+H]+		935.745	ESI pos	3.036	72373		91950		90750		108224		92339		83771		71561		33374		75166		51768		68907		21033		na	93	133	203	70834	81200	72426	77863
2.46_942.74		[M+H]+		942.739	ESI pos	2.458	4828		8435		9855		17145		5532		5864		3880		6546		6099		7316		4292		3708		75	133	221	111	4814	4899	4991	5529
3.36_939.78		[M+H]+		939.777	ESI pos	3.363	50143		45123		49961		53669		39542		42447		31966		29932		40494		39925		50794		15311		174	222	184	250	46122	49033	43266	49851
2.99_900.73		[M+H]+		900.73	ESI pos	2.99	3621		8223		10011		24508		6340		4105		3862		6366		4043		3680		2896		4056		142	79	265	112	3429	3674	3992	3812
4.30_857.74		[M+H]+		857.74	ESI pos	4.298	11805		14696		16010		5334		8254		14906		10536		12939		15866		13722		10093		9941		157	118	154	408	15819	18098	16902	18104
1.90_402.35		[M+H]+		402.349	ESI pos	1.897	10365		13093		11746		13323		11872		14165		10465		16604		13219		14707		13748		10728		754	626	381	483	14150	12940	12291	12507
2.52_677.54		[M-H]-		677.538	ESI neg	2.525	3214		3782		6204		9960		4841		3780		1162		1195		689		1812		1983		210		na	na	na	18	2720	2787	2811	3131
4.11_953.83		[M+H]+		953.834	ESI pos	4.112	9894		17740		15980		25492		24773		15783		9009		4952		6397		5324		5144		4074		422	220	265	260	9487	10818	9601	10439
4.21_605.55		[M+H]+		605.55	ESI pos	4.212	113649		125965		171474		334391		157725		98698		32098		19702		29192		15555		38577		8401		655	600	520	340	81234	90929	80621	89888
3.81_597.54		[M+H]+		597.541	ESI pos	3.812	12860		12616		20881		27438		17684		11675		7945		3026		6567		2991		5953		1740		na	99	113	na	10807	11859	10160	11112
3.54_935.71		[M+H]+		935.71	ESI pos	3.542	7602		9236		8959		8219		7671		7986		7068		5860		7738		5929		8647		2842		na	na	na	105	7973	7981	7978	9036
3.94_874.64		[M+H]+		874.639	ESI pos	3.937	25828		24817		27959		36198		31997		31324		11777		5436		17081		11091		17435		2955		na	96	na	142	21315	22886	24342	21342
2.22_922.71		[M+H]+		922.713	ESI pos	2.218	1746		4632		4681		3146		4233		4043		5056		3793		6160		4432		2256		2187		175	140	na	na	3636	4001	4079	4247
3.36_970.84		[M+H]+		970.844	ESI pos	3.359	33804		34500		41415		41295		29606		34740		26384		19641		31467		30472		33905		12924		377	355	603	595	34450	37321	33326	38217
4.35_974.91		[M+H]+		974.911	ESI pos	4.348	8538		7778		9753		14560		9539		6600		4378		3527		3247		2005		3997		1820		781	745	817	710	6002	6766	7000	6685
3.65_935.78		[M+H]+		935.781	ESI pos	3.655	90637		87065		54216		57727		87185		87349		71656		35043		69262		46297		71754		23880		311	260	360	333	83694	86299	74747	85703
2.50_545.46		[M+H]+		545.456	ESI pos	2.496	3467		4046		4358		3098		5111		5012		4338		6245		6012		8480		6216		7624		435	349	377	357	5655	5093	4861	5334
3.66_602.51		[M+H]+		602.515	ESI pos	3.658	6778		7425		4451		14376		9324		6205		5055		3258		4662		2862		3151		2052		na	125	148	162	6741	6480	5930	5926
3.04_929.66		[M+H]+		929.664	ESI pos	3.036	23124		29661		30496		38399		29114		26257		22335		10051		24120		16545		20818		5859		na	na	89	105	23411	26693	23218	24464
4.45_874.78		[M+H]+		874.785	ESI pos	4.446	6867		6838		10263		22282		8505		6533		3195		3077		2793		2700		3225		1840		970	2242	2360	1473	4968	5087	5742	5184
3.11_873.64		[M-H]-		873.642	ESI neg	3.113	6977		11485		12418		7836		10398		12076		12544		19813		16104		18352		21816		16111		22	35	21	35	14560	12476	13089	13383
2.37_924.73		[M+H]+		924.725	ESI pos	2.372	3393		6835		6224		5542		4945		6917		6783		5033		9308		8266		5362		3396		78	274	107	341	6215	6935	6254	7027
4.08_875.58		[M+H]+		875.576	ESI pos	4.08	8786		11171		12113		16696		14017		10807		5719		3152		5487		1186		2833		695		na	na	na	na	8727	9701	10060	9005
3.51_916.68		[M+H]+		916.676	ESI pos	3.508	10396		10690		14220		11435		12475		10886		8670		4499		7552		4253		6839		2919		na	na	101	na	9340	10770	9617	10352
0.20_293.14		[M+H]+		293.135	ESI pos	0.205	863		1695		1279		1040		7731		18268		6346		7716		452		681		790		669		189	428	587	392	4223	3852	3628	4068
0.21_303.01		[M+H]+		303.015	ESI pos	0.207	2825		2797		2850		2349		3151		2366		2871		2816		2920		3811		3093		3524		87	131	110	387	3192	2965	3184	2775
2.01_958.65		[M+H]+		958.648	ESI pos	2.013	2542		3633		6099		8439		4624		6591		3590		6387		5526		4960		4783		4264		na	213	63	na	4679	5479	5227	5254
0.22_373.07		[M-H]-		373.071	ESI neg	0.224	3633		1338		2124		3677		3526		2352		6343		2310		1070		1018		1319		1421		13	58	41	76	1671	1794	1953	1755
2.88_927.70		[M-H]-		927.696	ESI neg	2.884	1262		1441		2192		2021		1473		1465		1281		1278		2234		1774		1548		735		na	na	na	na	1763	1527	1549	1619
3.95_894.75		[M+H]+		894.752	ESI pos	3.95	7812		8383		7327		9519		6931		7977		7491		5174		8004		5290		6581		4603		233	705	1081	454	7182	6389	6197	6438
0.20_247.03		[M-H]-		247.029	ESI neg	0.205	1653		1697		1346		1203		1810		1821		1786		1802		1771		1446		1417		1487		na	353	112	251	1781	1986	2041	1818
0.21_413.22		[M-H]-		413.219	ESI neg	0.213	2033		1997		2582		1805		2032		2745		2679		3131		2946		2527		3678		2364		46	137	47	148	1806	1637	1766	1564
3.67_595.48		[M+H]+		595.476	ESI pos	3.668	40878		58381		50968		106712		87455		51519		32493		10566		25035		8804		16902		6411		128	329	na	130	35261	39717	34789	38724
2.21_555.49		[M+H]+		555.489	ESI pos	2.207	13286		29408		20934		25682		26513		18535		10929		9141		8364		8397		5939		7040		187	278	300	363	29103	31206	27381	31659
3.12_917.72		[M+H]+		917.721	ESI pos	3.124	44264		58201		68590		94265		56375		61884		36136		44055		60312		81668		48048		26172		229	256	113	250	48846	52190	48134	55531
3.81_603.53		[M+H]+		603.526	ESI pos	3.813	14633		15217		22413		31280		20130		13627		9695		5191		8711		4500		8104		2658		239	323	233	255	12736	13616	11781	13551
3.26_896.74		[M+H]+		896.741	ESI pos	3.259	3383		4612		4624		16551		3658		3374		1576		4839		2676		3192		2336		2719		157	86	102	124	2707	3142	3103	3054
4.64_165.09		[M+H]+		165.091	ESI pos	4.639	7796		11579		11019		5476		5692		7750		8521		9194		13417		14392		11201		12570		1473	1425	1484	1343	11076	12125	10423	10736
3.36_589.48		[M+H]+		589.482	ESI pos	3.359	5159		7142		7285		9102		7068		5596		3770		2305		4708		4004		4674		1317		199	243	187	109	4993	5453	5591	5870
4.21_960.89		[M+H]+		960.895	ESI pos	4.215	16918		17433		18506		14163		17702		15799		10925		9040		8877		6024		8829		4695		932	766	1054	874	14836	16607	14478	14521
2.87_976.80		[M+H]+		976.797	ESI pos	2.874	5099		9716		7505		6395		9701		7213		6731		2642		5438		3421		3040		1759		182	99	101	87	6015	6344	5415	5756
3.36_911.65		[M+H]+		911.653	ESI pos	3.358	40731		65075		61660		74951		81268		57837		45935		12828		25650		9478		11114		8330		95	84	na	na	38185	42199	36010	39843
3.42_878.72		[M+H]+		878.724	ESI pos	3.419	7888		10211		14319		32671		16996		9534		7045		2666		4441		2703		3370		1828		280	93	154	219	6810	7409	7323	8018
3.94_263.24		[M+H]+		263.237	ESI pos	3.938	27889		28896		30638		50642		31525		28169		15107		10564		14166		11096		17525		5700		104	263	136	102	24915	25084	21614	23719
3.79_263.24		[M+H]+		263.237	ESI pos	3.793	28824		30164		33701		51402		33601		30401		15713		9973		16965		13990		17730		7611		109	178	415	194	23776	26985	23344	25520
0.22_371.21		[M-H]-		371.208	ESI neg	0.221	1878		1976		1866		1572		1238		1997		2620		2171		1991		1440		1725		1450		13	51	24	38	1561	1707	1704	1842
3.28_973.86		[M+H]+		973.861	ESI pos	3.28	3726		3754		5358		6072		3976		4048		2705		3349		5256		4559		2993		2492		334	429	305	380	3877	3736	3302	3700
4.49_1000.92		[M+H]+		1000.92	ESI pos	4.492	7764		8866		14018		32424		19797		9149		8116		2810		4472		3298		2873		2064		475	716	762	605	7341	6844	6522	7579
3.54_998.87		[M+H]+		998.874	ESI pos	3.541	18316		19835		22088		19216		17718		19160		14698		13194		17650		16328		20765		7573		357	443	499	388	18370	20053	18159	20852
2.13_430.38		[M+H]+		430.38	ESI pos	2.133	62859		73101		74041		44830		68679		76035		66865		93284		91025		97792		92570		85779		524	731	983	1142	100098	90904	87091	86970
3.51_595.47		[M+H]+		595.473	ESI pos	3.51	108916		134832		183203		392508		204354		124011		84563		18636		60407		21162		40758		10469		na	151	na	na	93873	105609	90792	100237
3.65_178.94		[M-H]-		178.945	ESI neg	3.652	1685		1838		2086		2625		2342		1848		1084		574		1135		779		1237		575		243	236	216	256	1934	1728	2007	1797
3.04_964.80		[M+H]+		964.798	ESI pos	3.036	3076		4350		4705		6384		4522		3901		3479		1741		3469		2618		3199		1400		137	191	79	200	4084	4103	3711	3583
3.51_893.75		[M+H]+		893.745	ESI pos	3.51	4389740		5199416		5690814		5734622		5628183		5022124		3403692		639835		2367263		731855		1602093		387237		1710	2032	2698	1786	3788428	4205993	3719855	4236706
3.12_996.86		[M+H]+		996.86	ESI pos	3.125	14115		17193		20645		28913		16651		18634		11562		15023		19313		23802		14556		9276		409	434	269	411	14689	16377	14921	16861
3.26_957.79		[M+H]+		957.787	ESI pos	3.259	6601		10038		12316		35279		6355		4774		2485		9562		3994		4097		3030		4273		145	385	270	164	3918	4257	4631	4240
3.04_891.71		[M+H]+		891.709	ESI pos	3.037	8885		11709		12861		22133		11257		11349		9996		17810		16802		17897		12197		14664		79	158	332	333	10871	12562	11569	12514
3.67_573.49		[M+H]+		573.491	ESI pos	3.668	32638		53621		43771		86342		71541		44747		30283		10352		23054		8779		13951		5581		266	331	116	230	30875	33584	30820	35417
3.20_934.69		[M+H]+		934.688	ESI pos	3.2	6147		5152		5649		6236		5068		5067		3469		2018		5035		3928		5305		1363		126	na	na	82	5143	5115	4455	5146
2.78_702.58		[M-H]-		702.584	ESI neg	2.783	6561		7269		8998		7733		10634		18193		15945		21338		34957		38268		42435		33356		29	18	na	42	14710	14420	14230	12576
2.88_889.69		[M+H]+		889.689	ESI pos	2.875	3531		7140		6065		8255		6415		5356		4800		5114		5978		4554		2979		4314		116	77	na	na	4189	4907	4347	4501
3.85_595.47		[M+H]+		595.472	ESI pos	3.845	10685		19895		22590		30184		27814		19330		10212		2789		7976		2980		5080		2504		130	na	94	93	11068	12305	10525	10907
3.51_597.54		[M+H]+		597.54	ESI pos	3.511	12594		16564		23889		46296		25915		15280		9433		1389		5739		1698		4011		1252		247	na	86	91	10724	11739	10235	11780
2.86_929.76		[M+H]+		929.763	ESI pos	2.864	10026		10333		14254		25660		12047		11118		7546		11990		12084		15600		11378		7929		271	472	395	122	11589	12896	10976	12191
1.58_568.43		[M+H]+		568.428	ESI pos	1.581	4152		2751		3799		3563		4975		3745		3059		4627		2580		3266		2723		3253		311	290	115	401	4491	5206	5057	5229
3.72_887.71		[M+H]+		887.709	ESI pos	3.722	6174		5654		8221		11934		9378		6603		3516		1981		2735		2782		3279		1350		134	102	99	99	4666	5339	4940	5417
3.19_875.71		[M+H]+		875.712	ESI pos	3.195	15674		18494		19863		28408		17496		17216		10700		5073		13471		11665		15397		3045		129	176	130	198	16036	17722	15575	17854
0.23_329.24		[M-H]-		329.235	ESI neg	0.225	18012		16385		52886		30590		31623		59106		46663		58214		52906		60163		52088		43202		61	122	102	147	29069	33636	30268	33000
4.65_898.78		[M+H]+		898.784	ESI pos	4.646	8579		7347		11836		26477		8498		7693		3752		2874		3478		2712		4018		2137		1252	3001	3177	1474	4866	5630	5515	5670
3.36_912.83		[M+H]+		912.829	ESI pos	3.362	37832		36575		41893		60701		39272		36332		11470		6633		8899		9946		25894		3899		705	438	564	434	34318	36155	31579	37042
2.59_930.69		[M+H]+		930.685	ESI pos	2.594	2025		3465		4677		5415		3586		3353		3288		2280		3720		2971		3020		1861		na	76	106	80	3385	3431	2957	3424
0.17_907.09		[M-H]-		907.088	ESI neg	0.174	6380		6404		8229		6886		6209		5572		5511		5112		6199		5630		5501		6012		na	240	19	210	5712	5113	5640	4970
1.53_397.37		[M-H]-		397.372	ESI neg	1.53	61090		82243		88054		54965		88799		76378		52581		128792		101977		116237		117841		100659		359	602	390	515	109935	94195	102694	109017
3.48_881.76		[M+H]+		881.759	ESI pos	3.479	18065		21587		31249		49155		24048		22998		13148		17345		19405		20829		16338		9479		356	405	278	330	17794	19944	17161	19335
3.96_261.22		[M+H]+		261.222	ESI pos	3.96	6751		7423		10970		13578		9344		6462		3781		2429		4248		2164		3528		1109		na	121	na	na	6439	6712	5691	6481
3.29_888.77		[M+H]+		888.765	ESI pos	3.288	29145		36837		56262		82161		37513		39402		23408		28329		37927		44247		25333		16140		326	546	330	319	29616	33428	29094	32777
3.12_983.85		[M+H]+		983.847	ESI pos	3.125	3123		4819		6103		5621		4059		3661		2493		3938		4404		5259		3901		2350		573	173	613	277	3515	3580	3397	3982
3.78_910.79		[M+H]+		910.786	ESI pos	3.782	7664		7143		7582		12536		9096		7875		6006		6562		5518		5734		6507		4329		268	377	281	193	7729	7049	6511	7089
3.25_1014.87		[M+H]+		1014.87	ESI pos	3.254	4792		7271		8183		25501		4890		3204		1884		6461		2465		2967		2703		3067		416	351	312	558	3386	2885	3127	2985
1.99_810.57		[M+H]+		810.572	ESI pos	1.988	3092		3025		3475		4142		4969		4155		3600		5978		7478		7443		7468		5959		322	406	380	402	4284	4614	4002	4664
1.53_433.35		[M-H]-		433.348	ESI neg	1.531	4552		6217		5767		4229		5210		5394		3852		8424		6142		8145		7830		6474		30	78	97	75	7067	6483	6220	7227
0.22_685.35		[M-H]-		685.346	ESI neg	0.223	945		1242		1173		1278		1368		1715		2121		2224		1309		1103		1313		1589		na	na	13	na	1197	1106	1314	1211
2.19_575.50		[M+H]+		575.503	ESI pos	2.194	2358		2409		4274		3744		2480		4391		2605		4623		4710		5480		4802		5221		483	632	457	133	3547	4165	3768	4021
3.87_587.50		[M+H]+		587.503	ESI pos	3.869	5012		5431		9044		17816		8998		4533		2539		1242		2196		1581		2049		787		113	356	na	231	3505	4095	3736	3575
3.65_907.73		[M+H]+		907.728	ESI pos	3.645	4024		901		4324		5344		2131		3127		3170		7286		4154		6549		4015		7658		98	na	108	242	3838	4016	4028	3447
4.01_870.76		[M+H]+		870.755	ESI pos	4.008	6434		6196		11697		19675		8119		6080		2842		2156		3266		1612		2813		1773		275	478	869	726	5148	4408	4696	5061
1.75_613.42		[M-H]-		613.424	ESI neg	1.748	2232		3069		2425		1388		2280		2960		2698		4543		3912		3445		4989		4310		na	na	na	na	3818	3298	3540	3300
3.33_933.73		[M-H]-		933.733	ESI neg	3.333	1051		1236		1470		1829		1233		1261		1105		1441		1424		1508		1395		960		86	69	152	97	1393	1194	1243	1350
4.42_996.90		[M+H]+		996.896	ESI pos	4.423	4008		6549		9128		17972		13231		6459		5127		1918		3406		1793		1949		1132		383	519	784	720	4929	5476	4669	4802
0.20_939.11		[M-H]-		939.111	ESI neg	0.204	2303		1259		1916		3129		4871		2913		2044		3961		3255		2136		2642		3237		na	367	na	150	3553	3327	3916	3448
1.84_445.37		[M-H]-		445.369	ESI neg	1.842	810		917		1130		778		807		1020		967		1490		1826		1941		1750		1493		na	na	114	26	1321	1147	1189	1317
2.70_965.71		[M-H]-		965.713	ESI neg	2.7	1708		3825		4739		11961		2097		2134		1607		2548		2022		1263		1467		1374		na	na	na	15	2108	1768	1960	1948
3.36_891.78		[M+H]+		891.78	ESI pos	3.357	44566		87030		68821		133343		137926		68191		33092		11756		29230		4555		12607		4876		213	232	437	236	42636	45653	39786	39104
3.36_956.83		[M+H]+		956.826	ESI pos	3.357	9170		8675		10348		11016		8115		8645		6925		5296		8460		8232		8655		3254		357	355	352	397	9023	9155	7827	9063
0.21_463.06		[M-H]-		463.059	ESI neg	0.213	2117		2443		2236		1876		2339		2659		2674		2402		3146		2514		2521		2722		22	388	162	287	2381	2191	2274	2005
3.04_913.69		[M+H]+		913.69	ESI pos	3.035	79281		105661		108855		134004		105772		95834		78639		31365		83221		55145		70816		19306		94	135	99	116	80712	92972	80458	88622
3.94_901.53		[M+H]+		901.526	ESI pos	3.937	14722		12137		20291		23262		16724		11186		3934		3783		4351		3338		5756		1659		na	na	na	na	10244	9979	11718	10632
1.74_425.40		[M-H]-		425.402	ESI neg	1.735	12045		14959		12033		10333		16630		9455		7744		21504		10306		17741		18756		14373		25	58	34	95	17092	16004	16486	18819
3.29_879.74		[M+H]+		879.744	ESI pos	3.291	38219		47205		68794		116485		48894		43654		24735		40770		37492		46316		31213		17551		299	288	328	240	33794	38291	35037	39368
0.22_603.15		[M-H]-		603.149	ESI neg	0.223	1686		1700		1911		1747		1946		1827		2389		1524		1463		1387		1084		1271		na	75	na	84	2089	1863	2104	2219
3.00_858.70		[M+H]+		858.703	ESI pos	2.996	4153		6262		4869		4695		4643		5696		4669		6893		7501		7528		6156		6485		94	245	146	358	5929	6625	6935	6118
3.81_872.91		[M+H]+		872.912	ESI pos	3.808	21033		20684		15269		9493		20257		21337		18379		7818		16727		9320		10429		4728		648	922	723	648	20443	18277	18077	20731
0.17_453.04		[M-H]-		453.042	ESI neg	0.173	10007		9296		11002		10077		10891		9419		8317		6320		8985		9512		7551		10279		15	1031	151	911	8134	8086	9331	9002
4.63_855.72		[M+H]+		855.722	ESI pos	4.628	4779		7114		6269		3485		4039		5845		6290		6953		10710		13465		8617		11290		154	365	297	266	7084	8163	6979	7536
4.23_631.57		[M+H]+		631.565	ESI pos	4.228	15901		19014		25227		56159		28486		16114		6736		3154		5572		3183		5321		2144		145	545	266	152	12140	12777	12260	14168
0.22_135.12		[M+H]+		135.117	ESI pos	0.219	8662		9390		8956		6790		7890		9830		11674		12108		8925		8033		9162		7213		980	607	974	612	7913	8926	7566	8422
1.78_429.37		[M+H]+		429.373	ESI pos	1.778	7116		12199		10914		8208		8868		9415		10018		14458		19487		22955		17253		18278		443	443	412	328	11652	13081	11349	12976
3.36_953.64		[M+H]+		953.638	ESI pos	3.359	5810		10977		10190		13749		13159		8457		5936		1709		3868		1447		1820		1074		99	na	na	na	5736	6252	5351	6214
3.80_879.80		[M+H]+		879.801	ESI pos	3.799	11230		11918		13586		17627		13056		10639		3715		2198		5322		2875		6618		2228		113	467	308	405	9951	10660	9015	9425
2.81_933.71		[M+H]+		933.715	ESI pos	2.814	5774		6958		10272		16434		7721		7280		5875		7357		9564		11159		9111		4984		na	253	na	81	7561	8492	8897	8836
3.26_935.73		[M+H]+		935.731	ESI pos	3.262	15800		23995		28756		93853		17359		12214		5841		22302		7497		8447		7308		9170		94	99	na	103	10031	11212	9770	11235
3.36_595.47		[M+H]+		595.473	ESI pos	3.358	71439		149117		143795		262916		213582		111839		70949		15075		39165		13849		16355		8351		na	117	168	na	64901	70704	62139	72761
4.21_939.71		[M+H]+		939.713	ESI pos	4.214	4986		5186		6135		4965		5059		4096		3072		2430		2484		1554		2352		1187		na	na	na	na	3713	4447	4099	4149
0.22_479.17		[M-H]-		479.169	ESI neg	0.222	1305		1092		949		1194		941		1046		1256		1159		1375		711		939		1080		21	30	27	81	871	870	926	1014
4.21_904.88		[M+H]+		904.878	ESI pos	4.214	60394		67863		95579		148571		96984		50796		23688		17271		20000		5790		25147		4341		756	1024	732	513	48985	52978	44269	49998
3.54_940.80		[M+H]+		940.797	ESI pos	3.542	12133		13926		15732		21615		15094		13265		10092		4623		8106		7884		8932		2713		365	297	137	328	11579	13034	11428	13111
3.80_861.73		[M+H]+		861.735	ESI pos	3.797	4940		5214		5906		8075		6941		5511		3998		2372		3347		3353		3361		1516		na	117	na	112	5109	5279	4631	4535
2.89_1029.76		[M-H]-		1029.76	ESI neg	2.89	579		1061		1102		1000		926		1192		813		1553		1454		1296		1418		1399		na	na	na	na	1451	1290	1292	1482
4.27_897.77		[M+H]+		897.774	ESI pos	4.266	5540		5822		13811		23470		8344		9701		2742		1735		2969		2182		3586		1549		317	1111	1040	684	4617	5100	4257	4708
3.65_891.78		[M+H]+		891.785	ESI pos	3.649	9634		9437		6702		11821		9545		10563		6435		5154		6996		6002		6957		2572		396	372	290	224	8473	9010	7611	8878
2.18_796.59		[M+H]+		796.594	ESI pos	2.183	2625		4344		4959		5981		3645		5053		3653		6289		11877		11311		8087		9238		167	153	156	167	6576	7139	6469	7576
4.62_1284.08		[M+H]+		1284.08	ESI pos	4.617	2150		3223		2438		1314		1390		2886		2462		2791		4357		5240		3594		4504		na	140	na	na	3196	3538	2999	3449
3.51_875.71		[M+H]+		875.714	ESI pos	3.51	55165		68751		94453		167003		101720		63824		39556		9395		28964		11011		19842		5898		na	259	234	121	45371	51767	44246	49703
0.17_951.08		[M-H]-		951.079	ESI neg	0.171	80899		93356		109261		101558		89264		80145		80455		82033		97722		93391		95453		99226		na	1906	154	1446	89651	77671	80542	76218
4.47_894.75		[M+H]+		894.754	ESI pos	4.472	6334		5162		7906		19361		5925		6078		3236		2294		3088		3158		4266		2781		576	2458	2471	1250	4248	5043	4467	4743
0.22_339.11		[M-H]-		339.109	ESI neg	0.218	5539		3772		3817		4560		4639		4331		10709		4542		1972		1958		2157		2201		29	44	45	92	3467	3892	3435	3956
0.17_858.57		[M-H]-		858.569	ESI neg	0.167	955		1365		1393		2270		1414		1224		1282		996		1814		1560		1206		1827		na	37	na	15	1272	1293	1477	1274
4.21_577.52		[M+H]+		577.519	ESI pos	4.206	127142		124233		200105		380807		198452		86588		32803		24480		22930		11609		27636		7696		760	859	567	811	85512	100222	86567	93305
3.04_949.76		[M+H]+		949.76	ESI pos	3.037	23573		29094		31312		39384		28850		25935		21642		11129		22717		17408		21367		7478		100	148	108	76	21307	24542	22067	24722
3.19_966.81		[M+H]+		966.811	ESI pos	3.195	6034		6681		6944		7866		6261		5446		4462		3925		5468		5022		5956		2940		na	228	298	195	6311	6643	6632	5638
3.13_971.76		[M-H]-		971.761	ESI neg	3.128	4329		7037		8084		29148		4247		2757		1137		7326		1625		1872		1672		2083		na	na	na	na	2961	2643	2574	2972
3.12_597.49		[M+H]+		597.487	ESI pos	3.118	8042		11052		12524		29004		9541		10534		5560		7513		8896		12490		8651		4935		282	152	97	346	8151	9351	7908	8656
3.11_897.69		[M-H]-		897.686	ESI neg	3.112	10057		18010		21850		19533		15772		17094		15242		27086		21373		27237		29794		18963		na	33	na	na	19720	18203	17773	20896
4.09_901.61		[M+H]+		901.609	ESI pos	4.087	16219		40915		39347		57434		43968		20861		11704		8749		11671		9864		11496		2534		na	na	na	na	20497	24494	23343	22291
2.21_599.52		[M+H]+		599.525	ESI pos	2.209	2705		4807		3600		4873		4831		2803		2677		1831		1565		2374		1961		2198		271	324	314	196	4277	5120	4901	4831
4.21_883.76		[M+H]+		883.761	ESI pos	4.213	13792		13671		15875		15626		15658		12755		9536		7286		7760		4762		7692		3278		430	368	252	329	13096	12761	11184	13234
4.01_886.85		[M+H]+		886.848	ESI pos	4.015	8679		12015		16979		31542		20713		12947		4772		2072		3585		1946		2811		1456		438	244	511	611	7256	8519	8002	8559
2.53_653.49		[M-H]-		653.494	ESI neg	2.527	2812		3120		5492		12293		4100		2946		1080		1051		1102		1000		1492		579		17	na	na	na	2244	2093	2487	2398
2.33_477.39		[M-H]-		477.393	ESI neg	2.332	1179		1627		1630		1905		1700		1189		741		1347		1068		1731		1303		1255		29	40	18	20	1915	1745	2099	1919
3.20_967.81		[M+H]+		967.809	ESI pos	3.198	4016		4326		4903		5648		4101		4338		3214		2683		4191		3990		3985		1595		268	165	370	101	3913	4370	3644	3993
4.09_966.72		[M+H]+		966.72	ESI pos	4.092	4777		4163		3969		2324		5831		4669		3429		3279		3106		2862		4892		1689		na	na	111	na	4770	4021	4544	4232
0.19_1067.12		[M-H]-		1067.12	ESI neg	0.193	1804		1436		1595		1640		1886		1695		1658		1822		1367		1136		1402		1280		na	48	na	44	1390	1239	1367	1188
2.44_962.68		[M+H]+		962.678	ESI pos	2.437	2493		4328		4969		5204		3721		4475		2559		6508		3861		4024		3790		3741		144	na	na	107	4174	4713	5002	4797
3.29_915.78		[M+H]+		915.783	ESI pos	3.294	34585		42725		62390		110307		46220		39191		22442		34439		33906		42512		28188		15963		359	560	407	189	31590	35960	32224	36691
1.50_502.37		[M+H]+		502.372	ESI pos	1.5	3252		6036		3639		1674		2816		5078		8950		12241		8615		11520		9241		9643		1087	1067	925	1065	6368	5920	5978	5291
3.00_953.75		[M-H]-		953.746	ESI neg	2.997	1648		2481		2973		3229		2200		2501		1672		2100		3199		3710		2689		1327		na	na	na	21	2545	2200	2341	2595
4.08_263.24		[M+H]+		263.237	ESI pos	4.083	15211		18287		20362		29428		19211		16565		8457		5020		7074		4860		8124		2360		147	106	na	321	12083	13963	11986	13378
2.63_864.64		[M-H]-		864.636	ESI neg	2.626	6001		6865		8370		7679		7437		11134		6898		16994		12605		13297		14009		13804		na	na	21	na	12694	12617	12260	10730
4.08_927.87		[M+H]+		927.872	ESI pos	4.085	24697		19885		28040		20234		18141		14297		13990		7304		11118		11048		14151		3945		648	1046	1013	723	24147	24642	21148	21698
0.17_551.04		[M-H]-		551.042	ESI neg	0.173	3529		2470		3129		3208		3941		3106		2862		2411		2091		2023		1823		2248		na	377	48	238	3425	3107	3738	3534
0.20_970.12		[M+H]+		970.117	ESI pos	0.195	32133		42111		35236		36578		33842		28748		38240		38487		41605		42263		51824		45649		253	1104	1962	4854	29922	27866	27808	24790
4.59_1258.07		[M+H]+		1258.07	ESI pos	4.593	5809		8248		6024		2784		4373		9933		6414		14864		10856		13566		6861		10838		na	168	176	173	9061	10109	8565	9897
4.01_589.52		[M+H]+		589.518	ESI pos	4.013	10499		11787		17615		37775		18191		12152		4829		2828		4244		2939		3699		2022		248	409	184	210	7625	8831	8345	9110
3.54_613.48		[M+H]+		613.483	ESI pos	3.536	3537		4072		5512		9166		5272		4368		3507		1920		2586		2170		2718		955		175	97	109	119	3283	3857	3896	3627
4.08_774.73		[M+H]+		774.733	ESI pos	4.077	1595		2567		2575		906		2715		2933		1897		4284		4571		5942		3468		5257		604	404	373	447	2870	3064	3442	3070
3.01_943.73		[M-H]-		943.728	ESI neg	3.014	956		1647		2413		6805		1100		971		641		1592		948		641		685		886		na	na	na	na	876	818	939	975
3.52_615.50		[M+H]+		615.498	ESI pos	3.516	9248		10192		13023		20367		12553		8393		5311		3512		5468		3957		6314		1872		413	348	416	230	7606	8443	7297	8536
4.20_917.83		[M+H]+		917.828	ESI pos	4.204	11065		12233		15681		18646		16141		9530		5226		4417		4578		3343		4666		3643		431	519	448	345	7984	9565	8514	8996
3.20_889.69		[M+H]+		889.69	ESI pos	3.204	13029		18846		20037		17588		17757		16320		12493		7004		12536		9518		10321		4237		114	139	na	77	13760	15122	12562	14313
3.35_892.73		[M+H]+		892.73	ESI pos	3.355	259562		570123		533374		954068		859634		413860		264542		60662		148791		49106		65224		32193		499	512	510	376	246461	266185	233828	278111
4.08_901.44		[M+H]+		901.438	ESI pos	4.085	12920		16329		23210		34825		26223		18373		9429		5866		4368		4443		6810		1406		na	na	na	na	13031	12795	11293	11303
4.09_341.30		[M+H]+		341.305	ESI pos	4.095	6030		6830		6819		10897		7578		6553		3255		2080		2573		2355		3341		1475		na	na	na	na	4485	4805	5386	5069
3.42_838.66		[M+H]+		838.663	ESI pos	3.416	2562		3418		3497		3487		3300		3488		3782		5674		4799		5530		4798		4674		106	96	na	80	3840	4314	4267	3679
3.62_397.38		[M+H]+		397.383	ESI pos	3.621	4294		3967		6457		2675		4987		8340		5874		9008		7311		8688		5917		6821		na	104	na	na	5621	5734	4810	5241
0.22_431.23		[M-H]-		431.23	ESI neg	0.221	11956		13174		11293		8959		7526		10248		14210		11736		9865		7664		7958		7293		170	181	166	229	9533	10556	10526	11551
4.28_829.71		[M+H]+		829.707	ESI pos	4.277	8519		12353		6950		2857		7533		9765		11366		28013		17887		33168		21413		23643		114	352	150	171	17407	16002	14758	14877
2.20_965.62		[M+H]+		965.616	ESI pos	2.198	1901		2696		4677		3206		2218		5199		3823		7359		5493		5699		5940		5590		77	64	na	na	4980	4662	4791	5549
4.12_948.75		[M+H]+		948.748	ESI pos	4.123	2799		3498		3816		4175		4028		3499		3788		2534		3092		2661		2792		2428		na	123	108	na	3770	3600	3167	3749
2.26_659.54		[M+H]+		659.535	ESI pos	2.257	11397		14587		17933		19613		18046		16404		9057		4330		9780		6960		8347		3430		542	599	373	443	12475	12935	10856	11512
4.08_865.69		[M-H]-		865.686	ESI neg	4.08	531		988		481		174		544		963		692		2479		1490		3144		1441		1959		16	na	na	na	1369	1241	1142	1194
1.96_571.49		[M+H]+		571.495	ESI pos	1.96	2927		4994		3106		5806		5006		3698		2651		1930		2519		1645		2040		1394		296	363	282	118	4020	4504	4376	3788
4.64_1387.22		[M+H]+		1387.22	ESI pos	4.64	24972		36209		31197		14896		17427		29965		28916		33908		46236		54356		35453		49714		na	114	255	na	37431	42876	35867	37928
3.12_939.78		[M+H]+		939.776	ESI pos	3.123	24144		31338		36940		42946		31179		31611		20823		23376		32483		42860		27052		15978		126	158	268	135	26731	29134	26157	30975
3.00_875.71		[M+H]+		875.713	ESI pos	2.997	24324		32319		55041		96889		32663		37547		29769		27031		46169		43786		29946		18921		146	116	284	142	31812	34966	29579	34809
4.52_1230.04		[M+H]+		1230.04	ESI pos	4.518	3512		6528		4039		3322		3181		4264		3738		8608		6328		8016		5173		5977		na	na	na	na	4367	5233	4792	5105
3.97_930.76		[M+H]+		930.762	ESI pos	3.969	4770		5466		5835		5716		5592		5166		4456		4700		4376		3318		3671		2761		na	107	111	443	5238	4801	4382	5139
2.66_688.57		[M-H]-		688.568	ESI neg	2.66	6918		7206		8580		5071		12461		20173		12947		19048		29569		38251		38453		30796		15	14	na	17	12209	10295	11596	12299
3.67_910.77		[M+H]+		910.769	ESI pos	3.675	5128		6964		4354		4413		8607		6162		5904		2579		4727		2947		4196		1772		115	300	302	298	5741	5904	5253	6377
1.53_435.35		[M-H]-		435.346	ESI neg	1.531	1433		1893		1691		1382		1545		1471		1211		2590		1805		2322		2608		1862		na	27	17	38	2089	1853	1939	2218
3.01_892.71		[M+H]+		892.712	ESI pos	3.009	6286		8181		8732		14032		7333		7531		6803		11000		9944		11320		8083		8237		177	157	312	148	6667	7936	7206	7833
2.90_704.61		[M-H]-		704.607	ESI neg	2.898	1250		889		1371		351		1380		1496		1999		2935		2965		3598		3684		5031		94	128	176	152	1762	1667	1596	1455
3.28_853.73		[M+H]+		853.728	ESI pos	3.283	27326		37409		51835		66907		32313		38429		24934		28920		38387		50916		24817		16914		246	375	255	352	27477	31864	28960	32607
3.79_599.56		[M+H]+		599.556	ESI pos	3.793	85317		89965		99731		142666		97299		86154		49217		31206		52243		41991		54791		20622		na	na	116	288	72655	81412	67085	74241
2.52_985.73		[M-H]-		985.735	ESI neg	2.524	1603		2386		2375		885		1529		2993		1077		1358		2066		3023		2181		534		na	na	na	na	2350	2058	1973	2033
1.88_748.52		[M-H]-		748.517	ESI neg	1.875	51738		57822		64359		53635		45506		66474		57459		88542		84173		81761		112714		87295		55	141	38	135	79358	77723	66074	73412
2.90_668.62		[M-H]-		668.621	ESI neg	2.903	1268		881		1540		969		1542		1504		1982		1510		3063		2744		3373		1552		33	30	na	16	1513	1722	1841	1722
2.16_786.57		[M+H]+		786.572	ESI pos	2.16	2060		3940		4476		4984		4989		5127		4263		7015		9260		9482		8194		7692		208	195	251	110	5464	6097	5086	5263
4.21_629.55		[M+H]+		629.551	ESI pos	4.213	12342		13233		18601		35413		19949		12420		4535		2916		3569		2280		3488		1321		304	424	308	133	8716	10231	9603	10478
2.64_924.73		[M+H]+		924.729	ESI pos	2.643	6408		11530		17325		24561		15345		11068		10386		9836		13194		11760		5979		7447		118	134	144	70	10636	12083	10075	11500
4.64_1330.14		[M+H]+		1330.14	ESI pos	4.64	5569		8185		6186		3974		3533		6374		5554		7415		9282		10776		7556		9153		na	na	na	na	7648	8372	7075	8395
3.63_842.72		[M+H]+		842.724	ESI pos	3.626	33790		33608		42359		83020		62023		29532		21300		7912		14551		8731		10374		5258		244	420	276	594	25329	29148	24869	28501
4.07_937.70		[M+H]+		937.7	ESI pos	4.069	6951		6759		6296		4782		6230		7445		6674		5598		5663		4576		5622		3868		na	125	140	na	7786	7177	6463	6783
0.21_281.14		[M-H]-		281.14	ESI neg	0.211	1366		2285		1405		1010		1408		1308		1204		1287		2032		1200		997		1314		55	89	92	108	1826	2183	2150	1979
4.21_603.54		[M+H]+		603.536	ESI pos	4.21	362130		381258		562598		1242891		582879		242022		87336		69741		70957		34293		95055		21049		613	957	677	1032	238476	275618	231726	262450
1.32_399.35		[M-H]-		399.35	ESI neg	1.325	2605		4947		3185		2078		3003		3304		2384		6780		5622		8706		8353		7517		na	46	16	35	11099	9122	10015	10430
2.79_928.76		[M+H]+		928.76	ESI pos	2.795	18046		23167		40215		72171		28202		25680		17589		22927		31071		39483		27692		15802		85	254	371	202	26088	29728	28206	31649
2.75_672.57		[M-H]-		672.572	ESI neg	2.746	492		959		890		988		1240		1590		1409		1700		4961		4601		5495		4196		13	na	na	14	1641	1423	1450	1364
4.52_1244.06		[M+H]+		1244.06	ESI pos	4.523	3692		5967		3488		1916		3279		3557		3462		7424		5794		10875		4337		7340		158	na	na	na	4361	5088	4985	5298
0.48_374.29		[M-H]-		374.291	ESI neg	0.483	729		1026		762		693		1114		1055		1129		1406		2119		2398		1833		2128		13	na	na	na	1501	1298	1426	1576
1.74_397.38		[M+H]+		397.383	ESI pos	1.743	5843		7435		6182		5157		6444		7485		6221		9834		8173		9443		9673		8474		138	165	194	131	8325	8961	8388	9898
3.51_597.49		[M+H]+		597.489	ESI pos	3.51	224123		302460		421170		865552		456328		274317		168568		39655		117602		43843		86681		22953		na	608	267	372	182363	213504	184874	209487
2.87_611.47		[M+H]+		611.467	ESI pos	2.872	5235		11305		9097		9002		10068		7960		6439		3071		5142		3218		2995		1694		86	143	18	80	5539	6423	5632	6454
4.44_876.80		[M+H]+		876.8	ESI pos	4.441	4263		5039		7197		14733		5789		4001		2669		2673		2727		1930		2418		1570		999	1705	1623	1111	3941	3659	4107	3403
3.43_713.58		[M+H]+		713.584	ESI pos	3.433	4292		4402		6471		3231		5102		7019		6037		11345		9430		14074		9156		12489		125	na	82	91	5037	5632	5985	5115
3.36_892.78		[M+H]+		892.781	ESI pos	3.359	20024		22453		36384		55979		50083		23174		18740		2759		5498		3880		4669		2815		500	277	608	270	17237	19839	16878	19467
3.91_501.47		[M+H]+		501.467	ESI pos	3.907	2104		2491		2905		2226		2973		3062		2825		3901		3859		5291		2685		3814		50	362	158	312	3349	3217	3409	2820
3.10_928.82		[M+H]+		928.824	ESI pos	3.097	8059		9229		12967		57204		8531		6692		1701		9530		4023		4768		3164		5400		319	491	312	338	4890	5868	5046	5484
4.47_900.80		[M+H]+		900.802	ESI pos	4.466	12268		13455		18858		46858		15159		11150		6314		4103		5933		5211		5824		3717		1049	2899	3372	1899	8925	9362	8523	10321
1.35_405.31		[M-H]-		405.315	ESI neg	1.346	1805		2818		2324		1821		2349		2846		1995		4333		4060		5120		4718		4020		19	49	46	86	4390	3939	4562	4815
2.85_750.59		[M+H]+		750.593	ESI pos	2.848	2939		3036		2781		2431		2570		3265		3466		3965		2963		4122		3149		2791		253	675	488	397	3861	3322	3989	3521
3.36_595.52		[M+H]+		595.524	ESI pos	3.357	3133		8052		7835		14184		12339		5566		2832		1005		1402		1150		707		544		106	30	na	82	2740	3038	2654	3165
3.94_313.27		[M+H]+		313.274	ESI pos	3.939	9279		10248		11987		12744		10911		9992		6462		3423		6461		4563		5700		2052		na	133	187	194	8989	7484	7813	7755
2.94_987.71		[M-H]-		987.707	ESI neg	2.944	726		1181		861		663		676		1061		856		578		2019		1990		1920		158		na	na	13	na	1165	1011	1208	1053
2.86_903.75		[M+H]+		903.745	ESI pos	2.862	2620		3052		5028		7848		3853		3883		4078		3014		4739		4183		4168		2398		362	243	143	150	3447	4047	4027	4186
3.12_912.83		[M+H]+		912.828	ESI pos	3.116	6972		9889		12613		17714		9286		9587		3867		6707		9653		6393		7302		2680		256	407	258	346	7238	8280	7348	8540
2.98_891.71		[M+H]+		891.708	ESI pos	2.976	4193		4835		8287		22456		5841		4349		3201		10277		6178		8489		4475		3007		127	119	150	na	3672	4007	4032	3367
3.85_937.80		[M+H]+		937.797	ESI pos	3.852	42488		45893		56803		65230		56565		39914		21708		12206		20919		18069		24734		10209		183	269	1117	220	39530	38358	32776	38947
3.98_629.55		[M+H]+		629.55	ESI pos	3.976	4380		6044		7912		11472		8756		5881		3444		1316		2547		2334		2965		1169		336	513	444	177	4161	4911	4873	4324
0.21_331.07		[M-H]-		331.069	ESI neg	0.212	18641		8900		9464		6266		10092		11210		10147		11194		9747		7363		6511		10817		222	712	528	916	7357	8817	8815	8607
4.35_988.93		[M+H]+		988.927	ESI pos	4.349	13099		14253		18279		27455		17172		11458		6480		4848		4780		3180		6399		2909		937	696	862	869	9519	11398	9798	10746
4.64_1286.10		[M+H]+		1286.1	ESI pos	4.636	17648		27342		22821		11398		11529		21341		20069		24811		35727		42947		27473		36877		206	154	136	184	27899	31093	25354	27843
4.44_635.60		[M+H]+		635.596	ESI pos	4.439	3526		4449		6335		12913		6726		4430		3082		1360		1601		1802		2047		1330		699	405	693	393	3572	4000	4023	3391
3.54_915.85		[M+H]+		915.847	ESI pos	3.537	7596		7844		14500		12553		13367		10018		3029		3512		4893		3592		9621		2063		775	747	690	640	6280	5622	6746	6754
2.87_911.67		[M+H]+		911.675	ESI pos	2.873	32672		71627		56359		57149		64537		49378		41707		13462		31336		18399		16636		7907		80	na	110	107	35084	40023	32857	37182
3.16_931.72		[M-H]-		931.719	ESI neg	3.162	1654		1646		2147		2543		1812		1632		1214		1802		1662		2008		1579		806		na	na	na	na	1742	1495	1529	1755
3.44_959.80		[M+H]+		959.8	ESI pos	3.442	3432		5977		5526		16553		3411		2958		2057		4910		1934		2218		1806		2453		189	342	90	233	2253	2708	2565	2713
0.21_144.08		[M+H]+		144.081	ESI pos	0.213	3844		5073		3056		3602		4337		2860		3451		4671		3468		3721		3502		3252		65	415	53	1684	4596	4472	3834	4617
3.10_933.72		[M+H]+		933.716	ESI pos	3.105	35079		61026		62032		183895		38232		30870		15241		50008		23322		29981		19980		26445		84	83	172	140	24827	29250	24355	25992
4.43_607.57		[M+H]+		607.565	ESI pos	4.431	5141		5954		10046		19079		9723		4415		2739		2246		2330		2032		2962		1545		1426	1558	1389	1094	3893	4100	3653	4456
1.65_646.50		[M+H]+		646.504	ESI pos	1.652	2768		5878		6027		7344		6338		5823		3785		1778		4505		3487		3259		1062		219	162	213	367	3093	3547	2949	3400
1.93_427.36		[M+H]+		427.357	ESI pos	1.93	3765		4557		4369		2414		3533		5230		3539		6211		5828		7203		5541		5865		307	322	202	305	6189	5642	5173	6194
3.42_906.77		[M+H]+		906.775	ESI pos	3.415	12076		16518		23114		71727		12324		7631		4280		12594		4250		5746		3493		5435		298	285	553	418	5881	7155	6499	6932
2.87_908.73		[M+H]+		908.728	ESI pos	2.868	54419		102015		104707		113173		103431		85368		76404		33710		72730		42958		35691		21386		121	124	223	106	60052	70427	59270	67150
3.54_941.79		[M+H]+		941.793	ESI pos	3.542	25528		28263		27571		29484		22967		25258		19184		15049		21654		20808		29209		8594		301	349	154	133	22764	25545	23516	27438
3.28_942.79		[M+H]+		942.79	ESI pos	3.284	12250		13377		15529		25356		12790		11210		8230		8019		9063		9784		8218		4130		241	263	234	136	10382	12151	10127	11394
3.51_895.75		[M+H]+		895.75	ESI pos	3.51	274758		343474		453821		819285		494701		321129		203275		47987		151332		56383		109014		29015		229	384	387	314	230163	257939	224980	267624
0.22_491.12		[M-H]-		491.121	ESI neg	0.216	2964		1576		1013		2380		3294		2024		5032		1138		635		525		831		1084		14	35	15	62	1982	1948	2276	2276
1.24_355.32		[M-H]-		355.324	ESI neg	1.242	24599		46349		29060		20231		38982		33033		19929		61126		65795		72549		79143		58199		291	585	340	607	56898	52121	55197	63567
0.21_481.20		[M+H]+		481.205	ESI pos	0.213	8058		7785		10659		7970		10624		10291		10580		12252		9949		10980		15082		8710		111	103	184	189	7454	8567	7577	8823
0.22_337.09		[M-H]-		337.094	ESI neg	0.218	8741		3900		5961		9227		9224		6604		15750		6948		3572		3153		3605		3953		17	172	111	176	4090	4431	4828	4945
0.22_327.11		[M-H]-		327.11	ESI neg	0.22	2909		4486		7145		13069		3101		3748		3663		4187		9919		7605		13093		11759		29	24	46	155	3561	4160	4175	4360
0.24_425.02		[M-H]-		425.017	ESI neg	0.241	5475		6987		7187		3565		5612		8359		7682		9229		8076		10079		10701		9781		na	37	na	58	6006	4975	5575	5136
4.44_601.52		[M+H]+		601.518	ESI pos	4.439	4161		4678		6395		16150		6652		4330		2711		1922		2269		1767		2348		1284		285	209	641	493	3517	3904	3165	3518
3.20_599.50		[M+H]+		599.503	ESI pos	3.196	24308		29400		31518		51382		26605		26630		15451		9235		19015		19112		23055		5082		480	257	134	299	23703	26363	23459	27966
0.22_441.08		[M-H]-		441.084	ESI neg	0.216	1689		1665		1782		1989		2324		2350		2071		1954		1580		1611		1808		1494		38	43	86	202	1832	1997	2159	2225
4.21_876.86		[M+H]+		876.862	ESI pos	4.215	96139		98858		99322		71399		126671		75970		40615		25637		28298		15912		31030		10192		1041	1184	1594	531	72745	80954	66209	70159
3.79_900.78		[M+H]+		900.784	ESI pos	3.794	182696		176148		196101		240330		199138		179729		103886		77136		109166		93627		114898		52970		555	616	663	485	150457	177062	147084	164144
3.79_952.83		[M+H]+		952.832	ESI pos	3.792	7080		7001		6000		7186		7333		7068		8466		8727		8215		8712		8939		8408		514	463	695	325	8251	7940	8346	6870
3.02_884.73		[M+H]+		884.732	ESI pos	3.022	3528		5616		8941		8949		6229		5870		5767		4294		8007		4505		3685		3313		204	98	117	238	4358	4907	4199	5005
3.66_923.84		[M+H]+		923.835	ESI pos	3.664	5271		3944		8825		3313		4688		5550		2682		2393		2454		3115		3985		1982		943	860	463	884	4079	3563	4212	3589
3.52_616.50		[M+H]+		616.502	ESI pos	3.517	4367		4583		6498		9196		5956		3888		2683		2010		2405		2138		3245		1092		na	160	na	271	3253	3710	3025	3439
0.21_289.07		[M-H]-		289.073	ESI neg	0.215	32977		26328		39143		25741		24382		38889		29360		28630		39015		32843		26341		28963		309	532	407	881	21300	25203	25292	25941
3.20_740.68		[M-H]-		740.68	ESI neg	3.201	872		774		703		482		1007		702		819		1336		1272		2249		2033		1424		na	48	19	35	1241	1173	1091	1339
3.16_731.60		[M+H]+		731.596	ESI pos	3.159	2810		3158		3972		2374		4064		4715		4694		6741		6801		9358		5758		7126		292	141	155	136	3367	4021	3524	3367
4.19_843.72		[M+H]+		843.724	ESI pos	4.192	11540		12654		11839		5629		13451		21745		12092		24463		20547		27596		21059		14420		62	486	107	692	17571	21610	19081	19037
2.33_675.52		[M-H]-		675.524	ESI neg	2.331	10692		13068		19233		40757		18269		16141		5016		3383		6595		5397		6875		2214		14	19	na	17	9852	9366	8904	10883
1.44_775.70		[M-H]-		775.702	ESI neg	1.436	2532		3732		3923		2003		4392		3057		2306		5435		3739		3826		4329		3956		na	na	na	na	4952	4655	4593	4006
2.94_1012.85		[M+H]+		1012.85	ESI pos	2.936	2687		3704		5387		9970		2916		2469		2184		6486		4413		5674		2829		5160		211	217	454	349	2711	2857	2738	3258
2.86_909.73		[M+H]+		909.733	ESI pos	2.86	20641		34359		42072		52564		37975		32050		30943		16985		35047		22016		16817		11859		97	208	167	79	22909	27178	22962	26055
1.75_615.50		[M+H]+		615.499	ESI pos	1.747	4594		5931		7822		8093		5296		6592		3531		5944		8025		10783		6698		4621		560	693	470	539	5443	6453	6133	6694
2.60_832.61		[M-H]-		832.608	ESI neg	2.604	786		1175		972		1657		840		1218		871		1886		1558		1587		1727		1305		14	na	14	na	1252	1236	1476	1409
2.97_905.76		[M+H]+		905.761	ESI pos	2.966	3563		4554		7382		12705		5260		4842		4025		5431		5502		6073		4145		3387		353	173	242	170	4419	5182	4395	5078
3.04_597.49		[M+H]+		597.488	ESI pos	3.036	11862		15516		17224		25640		15027		13375		11816		4465		11911		8582		9329		2978		99	243	125	127	11459	13819	11647	12058
3.42_965.68		[M+H]+		965.684	ESI pos	3.425	14934		14025		10179		18212		11544		11063		9749		5857		6562		8776		8191		3515		142	91	96	na	11497	13583	11395	12983
0.22_193.05		[M-H]-		193.054	ESI neg	0.221	1947		1546		1385		1756		2114		1544		2645		1546		1121		1000		847		1207		44	41	60	38	1809	2076	2164	2221
1.74_461.38		[M-H]-		461.377	ESI neg	1.737	1108		1585		1255		957		1481		925		858		2008		884		1643		1624		1504		na	na	na	na	1675	1363	1605	1617
1.63_447.36		[M-H]-		447.362	ESI neg	1.63	10419		11498		12211		10350		12013		10299		10110		16132		8817		14131		12666		11079		106	165	71	176	13435	12340	12180	14691
4.53_1309.08		[M+H]+		1309.08	ESI pos	4.528	3676		5068		4817		2349		3970		4390		5461		6682		10733		11101		6839		10103		na	na	na	na	6422	7843	6716	7229
2.69_871.68		[M+H]+		871.681	ESI pos	2.685	2667		6248		7135		7409		6743		5356		5490		4083		6540		3205		2427		2138		290	76	96	130	3392	4177	3620	3725
3.94_873.44		[M+H]+		873.442	ESI pos	3.94	12336		10001		17349		30797		19314		16192		11070		3548		13527		8521		7307		2083		na	na	na	na	15818	15621	12948	15059
3.20_905.66		[M+H]+		905.662	ESI pos	3.204	3784		5305		4814		4439		4821		4951		3782		2636		3769		2898		3097		1787		na	78	na	93	3509	4073	3343	3833
0.22_327.22		[M-H]-		327.219	ESI neg	0.222	1647		1529		5857		3586		3719		5916		5466		5001		7776		7982		7642		5331		45	26	14	42	3134	3477	3351	3864
4.50_1195.02		[M+H]+		1195.02	ESI pos	4.505	4653		4362		4737		2849		3809		5280		5842		6732		8033		12272		6775		8661		203	na	267	181	7224	8691	7367	8215
2.98_946.70		[M-H]-		946.705	ESI neg	2.983	2603		4315		4557		13088		2738		2315		1107		4271		1936		1700		1383		2129		na	na	na	na	2104	1740	2118	1957
3.51_595.52		[M+H]+		595.524	ESI pos	3.511	5119		7213		10304		22819		11592		6490		3752		947		2550		829		1859		671		268	104	na	na	4281	4988	4106	4710
4.44_575.50		[M+H]+		575.504	ESI pos	4.441	3731		5111		6341		13150		5663		4217		2842		1677		2181		2520		1853		1512		324	241	635	239	3463	3809	3172	3174
3.35_615.50		[M+H]+		615.497	ESI pos	3.354	10664		13267		13563		20738		12645		10367		6658		4815		7933		7680		7952		3113		202	496	545	535	9684	10800	8785	10375
2.71_945.70		[M-H]-		945.697	ESI neg	2.71	713		881		1113		1329		817		984		718		898		1338		1603		2021		816		na	na	na	13	1463	1203	1294	1237
3.88_910.79		[M+H]+		910.785	ESI pos	3.877	35787		37614		56728		128515		65528		38161		17408		6327		14539		9153		16738		4448		297	169	177	379	28983	30718	26297	32477
3.03_910.74		[M+H]+		910.743	ESI pos	3.03	123583		166938		203660		280099		168285		160401		126422		73359		160393		121973		117867		46954		273	237	602	197	128188	150438	127312	147471
3.60_862.68		[M+H]+		862.68	ESI pos	3.602	2135		2343		2039		1112		2245		2920		2683		4060		3842		4809		4218		4613		229	113	na	246	3312	3828	3270	3144
0.53_301.00		[M-H]-		301.005	ESI neg	0.525	8925		9948		8638		7726		10199		9049		9150		12437		11806		9641		10403		12436		81	2151	342	640	17362	17053	19219	20570
4.64_429.37		[M+H]+		429.372	ESI pos	4.64	3206		4554		3644		2684		2658		3708		3261		4246		4926		7521		4299		4953		146	451	136	280	5011	4390	4068	4352
3.71_943.81		[M+H]+		943.812	ESI pos	3.707	6274		6741		7892		8095		7366		6680		4780		4012		4740		4666		6117		2887		430	545	463	291	5649	6842	5786	6366
2.44_788.61		[M+H]+		788.61	ESI pos	2.435	5488		10038		9283		29933		12690		7014		5065		2153		4715		2609		3256		2719		344	385	401	336	8215	8146	6735	7955
3.21_925.76		[M+H]+		925.763	ESI pos	3.206	4910		6301		6699		7431		6954		5537		4946		3398		4731		3814		4307		2190		255	na	240	154	4521	5502	5504	5185
2.50_744.65		[M+H]+		744.65	ESI pos	2.502	2129		2796		2332		1871		3419		4177		4166		2816		7344		8491		4880		6965		224	428	270	351	4637	4804	4296	5319
2.16_673.51		[M-H]-		673.508	ESI neg	2.159	3158		3593		6908		12150		5540		5528		1985		922		2422		1555		2127		638		na	na	na	na	2972	3095	3058	3602
2.97_930.78		[M+H]+		930.775	ESI pos	2.974	8763		12015		20188		42088		13511		10397		8361		15314		12820		15082		12056		9854		93	91	149	59	11887	13297	12090	14376
0.22_175.04		[M-H]-		175.041	ESI neg	0.22	15043		6317		10022		14910		15259		11338		27129		12179		5801		5342		6463		7022		101	176	137	239	7106	8300	8480	8772
2.89_716.60		[M-H]-		716.601	ESI neg	2.893	11617		12893		16269		7943		16760		26830		24444		35787		42739		47978		45492		50816		na	46	42	77	22240	20392	17957	19435
4.64_1365.29		[M+H]+		1365.29	ESI pos	4.636	2068		2931		3259		2491		2927		3634		1636		4067		4784		5708		4208		4109		na	na	231	122	3506	3925	3155	3634
2.94_861.68		[M+H]+		861.675	ESI pos	2.936	3639		3539		4913		3609		4072		5067		3283		4026		4655		4903		4994		4329		na	96	293	204	3174	3859	3679	3876
3.12_921.70		[M-H]-		921.699	ESI neg	3.119	1499		2431		2407		6076		1440		1273		630		2248		945		1021		798		1428		19	na	na	na	1298	1044	1198	1227
4.33_968.86		[M+H]+		968.864	ESI pos	4.331	8127		10069		14083		33898		18122		10749		6292		2247		3823		2995		2328		1832		635	420	251	576	6088	7268	7530	7134
0.70_277.22		[M-H]-		277.218	ESI neg	0.705	1246		1718		2600		1302		1901		3075		2077		3395		2725		4328		3730		2846		16	54	na	na	1711	1711	1940	2045
0.22_159.05		[M-H]-		159.045	ESI neg	0.219	5348		3846		3722		4316		4693		4351		9832		4817		2027		1865		2283		2007		20	76	74	66	3257	3974	3542	3901
3.40_938.77		[M+H]+		938.775	ESI pos	3.399	5434		7391		7462		15096		7381		6645		3864		2417		4454		4206		3704		1545		194	247	118	245	4966	6161	5659	5369
3.52_973.86		[M+H]+		973.864	ESI pos	3.524	5940		5759		7608		4033		4683		5325		4177		4385		5039		6646		5808		3035		350	836	583	468	6228	6648	5334	6275
0.20_467.04		[M-H]-		467.038	ESI neg	0.203	7359		6200		5755		4621		7533		7225		5553		6067		5973		4791		3504		5377		na	734	25	526	6458	7578	7697	6597
4.03_894.75		[M+H]+		894.755	ESI pos	4.025	7812		8202		11074		24485		10141		7977		3542		2359		3286		2581		3359		1877		235	992	990	368	5248	6370	6197	6438
0.22_191.14		[M+H]+		191.143	ESI pos	0.221	4151		5103		4182		3219		2901		5060		5014		5009		4991		4614		5136		3432		695	735	610	978	4648	4632	3805	4274
2.44_337.27		[M+H]+		337.274	ESI pos	2.441	18833		22938		32121		82475		30181		21182		7476		4953		9813		7897		9887		3507		295	292	345	364	13657	16762	14866	16280
3.66_997.77		[M+H]+		997.772	ESI pos	3.656	4375		5360		2133		6504		5329		4721		3262		1743		3333		2130		3245		1418		99	na	na	na	4567	4997	4166	4121
2.65_931.70		[M+H]+		931.698	ESI pos	2.645	3552		4523		7464		9042		5599		5143		3964		3414		5600		6896		5283		3705		na	75	198	na	5025	6076	5042	5534
3.79_899.84		[M+H]+		899.841	ESI pos	3.792	96943		98686		104282		129130		109913		86202		54976		37229		54357		47557		58562		25734		779	662	975	837	83689	87895	70492	81211
1.09_341.31		[M-H]-		341.307	ESI neg	1.087	2428		3957		2722		1996		3385		4163		2042		5996		9810		10816		11547		7294		na	25	14	27	6320	6683	6799	7801
2.87_949.76		[M+H]+		949.758	ESI pos	2.873	5301		8427		8681		8531		8935		8199		6134		3633		6091		4635		4217		2872		104	78	na	183	5854	6709	5424	5770
2.66_922.71		[M+H]+		922.713	ESI pos	2.656	10658		32693		31182		88705		24896		14907		8541		11598		8075		5036		3024		6754		95	128	186	157	8326	10400	9206	9619
2.51_651.52		[M-H]-		651.523	ESI neg	2.509	1731		2775		3634		6584		2452		2615		797		639		875		837		1013		418		na	na	na	na	1742	1767	1970	2110
1.66_791.53		[M-H]-		791.533	ESI neg	1.662	1233		1737		2508		2897		3172		3768		1922		4503		5969		6493		7919		5191		13	17	na	na	3111	2802	3324	2732
3.80_940.82		[M+H]+		940.825	ESI pos	3.801	6964		5057		5985		5665		10032		5000		11157		8822		10387		9381		9863		8073		476	663	522	719	8008	9917	9371	9669
0.22_423.18		[M-H]-		423.179	ESI neg	0.222	4170		4844		3707		3613		3504		4669		7536		4263		4043		3066		3085		2605		38	22	33	66	3417	3835	4073	4246
1.55_530.40		[M+H]+		530.402	ESI pos	1.553	2070		3442		2630		1320		3875		2955		3656		6229		6747		6622		3912		4989		503	412	370	272	2838	2843	2482	3117
1.96_527.46		[M+H]+		527.458	ESI pos	1.958	13069		20228		12970		24430		18073		15831		9983		5405		7956		5461		5317		4649		470	82	305	313	16876	19899	16404	16785
0.22_287.06		[M-H]-		287.057	ESI neg	0.221	1653		1602		4385		627		1752		1490		1367		2504		2166		1494		1137		1302		15	16	23	52	1860	2285	2008	2211
0.22_189.02		[M-H]-		189.02	ESI neg	0.223	2003		753		1120		1736		2152		1451		3540		1538		756		715		766		1054		74	56	39	73	1097	1308	1305	1131
3.51_893.43		[M+H]+		893.428	ESI pos	3.506	12223		11003		11179		25867		21839		8042		6504		911		4450		747		2899		376		na	na	na	na	6811	8217	6856	7713
0.22_447.22		[M-H]-		447.224	ESI neg	0.221	2243		2804		2126		1886		1746		2499		3889		2474		3000		2194		2226		1697		58	61	35	90	1957	2253	2447	2324
3.78_900.46		[M+H]+		900.462	ESI pos	3.783	6735		8780		8426		9450		5917		5810		3426		2480		4004		2602		4002		1541		na	na	na	na	6121	5777	4909	5445
0.22_375.08		[M-H]-		375.082	ESI neg	0.222	2208		976		1240		1618		1628		1319		3327		1333		635		498		586		663		13	47	38	40	1040	1153	1297	1225
4.12_597.49		[M+H]+		597.488	ESI pos	4.124	3609		4830		5367		11420		6725		4534		2664		1228		2726		1272		1614		987		125	121	139	196	4131	3639	3375	3453
3.70_1000.89		[M+H]+		1000.89	ESI pos	3.7	3423		3418		3473		2849		3481		3331		2726		3436		3372		3135		3279		1748		402	346	490	227	3281	3743	3096	3718
4.11_573.49		[M+H]+		573.488	ESI pos	4.107	4646		5935		8666		11199		7475		5818		2944		1614		3620		1753		2692		968		213	na	358	241	3662	4051	4555	4346
4.43_902.82		[M+H]+		902.815	ESI pos	4.432	8699		8814		13584		35465		11350		8472		3541		3967		3867		3275		3924		2758		1767	1862	2057	1432	6395	6743	5632	7024
3.38_863.65		[M-H]-		863.653	ESI neg	3.377	1397		1554		1811		657		1494		1910		1524		3421		3152		2999		3531		3092		na	na	na	na	2580	2086	2286	2183
2.63_888.68		[M-H]-		888.679	ESI neg	2.629	1006		1083		1315		1118		1267		1665		1140		2740		2022		1915		2371		2004		na	na	na	na	2048	2036	1895	1663
2.67_933.72		[M+H]+		933.721	ESI pos	2.668	2432		3671		5162		6152		3406		3718		3258		3692		3643		3552		3458		1950		228	212	na	69	3532	3539	2886	3234
2.13_429.37		[M+H]+		429.373	ESI pos	2.133	60075		65101		66122		45813		60779		67418		63779		81698		82459		80748		79352		70733		426	885	639	639	95399	82402	79296	78394
4.23_928.89		[M+H]+		928.885	ESI pos	4.227	9393		16805		11488		85500		9693		11338		11401		1897		4340		727		5351		1624		264	284	403	258	17492	21779	21127	20702
3.08_952.69		[M+H]+		952.688	ESI pos	3.082	3154		4284		4117		7631		2837		4161		2307		4121		3503		4425		4081		2715		106	110	na	na	3218	3738	3968	3954
2.44_634.59		[M+H]+		634.595	ESI pos	2.437	6076		9103		12938		32915		11791		5730		1910		1462		1305		1732		2071		1065		20	219	154	69	4472	5249	4346	4348
2.77_674.61		[M+H]+		674.608	ESI pos	2.766	2402		3503		3434		2119		3851		4116		3291		4680		5049		6385		4751		6742		340	247	176	141	3408	4279	4060	3947
4.07_876.36		[M+H]+		876.36	ESI pos	4.072	6149		7218		6711		10721		7662		3555		2033		1846		1744		1276		1669		624		na	na	na	na	4637	3897	3818	4402
1.68_635.46		[M-H]-		635.456	ESI neg	1.676	22181		26691		31649		21462		25461		31120		28336		47416		35524		39460		42025		40869		162	269	190	339	42757	35204	35482	36670
2.69_926.74		[M+H]+		926.745	ESI pos	2.691	13336		16941		35526		69478		22719		18648		16178		13568		22509		21972		19006		9835		270	292	219	252	19225	22201	18066	21419
4.37_956.93		[M+H]+		956.928	ESI pos	4.368	4937		6158		8693		23066		9187		5960		2573		1625		1802		1586		2035		534		251	840	591	473	3203	2772	2743	3288
4.21_943.84		[M+H]+		943.843	ESI pos	4.214	22049		25428		30187		36541		31094		19618		9439		8627		8814		5927		11316		5618		549	806	270	567	17289	18999	15361	18728
4.64_441.37		[M+H]+		441.373	ESI pos	4.64	2998		4743		3858		2046		2153		3352		3273		2941		4584		5281		3253		4153		359	292	494	269	3801	4668	3878	4126
3.42_858.72		[M+H]+		858.719	ESI pos	3.425	2349		2290		5202		3611		2485		4136		3588		7065		6520		7884		7414		7813		123	97	179	269	3997	4301	4628	4989
3.36_931.75		[M+H]+		931.75	ESI pos	3.362	14699		23050		20033		23896		32078		18463		16504		2613		9338		1543		3730		1933		199	91	225	106	12655	14483	11538	13404
3.45_855.74		[M+H]+		855.744	ESI pos	3.447	7826		8536		12726		18879		10171		8493		5258		7478		6035		7926		6170		4348		456	434	607	417	6338	7151	6501	7787
3.40_715.60		[M+H]+		715.601	ESI pos	3.4	4776		2634		4196		2357		3966		4984		4340		6043		5916		7987		4600		5877		115	232	187	224	3215	3501	3741	4027
3.79_525.47		[M+H]+		525.467	ESI pos	3.793	5266		5980		6032		8474		7445		5131		2717		1965		3301		2840		4040		2135		137	113	180	107	4182	5207	4890	4497
2.63_313.27		[M+H]+		313.274	ESI pos	2.633	3752		5034		6152		13844		5112		4102		1594		1335		1989		1528		1752		1023		190	300	123	191	3067	3583	2883	3072
3.35_892.88		[M+H]+		892.881	ESI pos	3.355	9621		19557		18817		10843		11371		14849		10512		1096		5100		2610		2611		1260		1338	867	1071	1251	9641	9992	8557	10807
4.61_1373.21		[M+H]+		1373.21	ESI pos	4.608	10179		15409		11733		5361		9462		14282		11887		21970		17500		25529		13035		18845		252	155	na	na	15180	17783	14339	16676
3.81_875.77		[M+H]+		875.765	ESI pos	3.811	7052		8200		9630		9720		10388		8319		6234		4511		6545		4342		6630		3948		180	417	99	179	8556	8513	6904	8113
4.46_872.77		[M+H]+		872.769	ESI pos	4.457	9089		9540		13641		27632		10421		8629		4975		3514		4971		4223		4120		3263		957	2234	3246	2362	5786	7237	7037	6638
4.64_1344.15		[M+H]+		1344.15	ESI pos	4.64	3145		4240		3550		2475		2254		3572		3234		3873		4777		5664		4297		5808		130	na	na	na	4219	4591	3665	4450
4.46_898.78		[M+H]+		898.784	ESI pos	4.46	13426		14250		20772		52934		16914		12383		5981		4762		5558		5186		6907		3610		1479	4325	3978	2450	8502	10741	10132	9957
3.24_922.72		[M+H]+		922.723	ESI pos	3.24	3571		5298		4982		4841		3661		4894		4001		4660		5764		7140		5830		3627		87	142	141	232	3790	4557	4542	4758
4.47_899.79		[M+H]+		899.789	ESI pos	4.471	8018		8623		11842		31876		11309		7345		4582		2395		3592		3008		4298		2940		1018	2427	2861	1707	5306	6577	5530	5664
0.23_177.06		[M-H]-		177.056	ESI neg	0.225	3850		2900		2819		3219		4364		3367		5239		2881		1381		1754		1660		1718		68	73	66	70	3422	4301	3739	4008
3.43_749.65		[M+H]+		749.654	ESI pos	3.431	2813		3452		4020		2488		3396		4082		3818		6480		6810		7487		5338		6956		144	198	129	109	4197	3885	3422	3480
3.58_1030.86		[M+H]+		1030.86	ESI pos	3.581	6037		6177		5000		9005		4881		3758		1941		3141		2016		2865		2784		1946		173	na	186	121	4444	5429	4449	4912
2.83_746.61		[M-H]-		746.611	ESI neg	2.833	1550		2254		1407		805		2168		1545		2250		3558		2929		6286		5827		5621		na	14	na	na	4445	3537	4059	3804
1.60_597.39		[M-H]-		597.394	ESI neg	1.597	1967		2575		2457		2162		2203		2830		2315		4386		2778		3889		3736		3397		na	na	na	na	3549	2847	2977	3188
3.18_892.70		[M+H]+		892.702	ESI pos	3.18	3201		3735		5627		6228		3744		4194		4171		3597		5238		4800		3284		2650		92	91	111	92	3182	4040	3625	3556
2.09_816.58		[M-H]-		816.58	ESI neg	2.093	2619		4681		5136		13832		5494		3283		1815		708		2204		1233		1833		1021		68	38	28	62	3928	3706	3385	3144
2.19_758.63		[M+H]+		758.627	ESI pos	2.192	9834		19917		21034		57908		22156		16179		8137		2242		11086		7063		7490		4272		329	306	327	387	13899	16003	17041	17397
0.23_165.06		[M-H]-		165.059	ESI neg	0.225	1363		2569		3471		4256		1878		1693		1721		2063		4029		3800		4196		4439		36	53	37	84	2678	3248	3203	3368
3.51_598.54		[M+H]+		598.543	ESI pos	3.509	5038		6971		10251		21867		11416		6392		3552		1230		2269		1511		1459		919		248	332	481	594	4379	4562	3719	4660
2.77_573.49		[M+H]+		573.488	ESI pos	2.765	2798		3835		3556		2474		3256		4188		3689		5418		4744		6560		3925		6532		469	373	184	365	3733	4546	3740	4234
0.22_299.99		[M-H]-		299.991	ESI neg	0.224	1036		1490		2153		1831		2076		2095		2066		1910		1958		2069		2416		2148		na	19	14	16	1842	2144	2264	1900
4.44_659.60		[M+H]+		659.597	ESI pos	4.437	3959		4822		6283		15642		7678		4520		3159		1843		2300		1537		1978		1582		194	386	180	337	3315	3382	2709	3278
4.21_850.85		[M+H]+		850.848	ESI pos	4.209	8739		7066		12298		24248		9622		8507		3262		2915		2440		1814		2780		2009		1081	736	1166	732	8507	9260	7552	7626
4.51_877.73		[M+H]+		877.728	ESI pos	4.511	1996		2597		3513		3563		2535		2892		2887		6561		4539		8738		5946		4542		na	na	na	190	2762	3120	2528	3091
3.20_968.83		[M+H]+		968.826	ESI pos	3.204	9553		13608		14121		14196		14084		12260		10763		6126		10034		7921		9312		4950		124	155	486	374	9759	11401	9871	11828
1.80_431.35		[M+H]+		431.352	ESI pos	1.804	9285		14747		11813		19891		12289		9162		8055		13009		9200		12442		9470		10998		462	548	354	623	7679	9148	7566	8915
1.95_650.54		[M+H]+		650.536	ESI pos	1.954	4052		4897		8421		12427		6956		5595		3229		1933		3867		3893		4240		1453		207	317	57	245	4162	4732	3720	4202
3.75_908.77		[M+H]+		908.773	ESI pos	3.748	11992		15250		21671		53037		24826		14396		9230		2670		6067		4926		6272		2293		197	137	199	321	9740	11723	9694	11284
2.64_785.63		[M-H]-		785.632	ESI neg	2.636	1392		1164		2289		902		1909		2125		1565		3010		2723		3610		2581		3176		na	na	na	15	1917	1872	1699	1538
4.59_829.71		[M+H]+		829.707	ESI pos	4.592	9285		12819		9348		4874		6543		12775		10620		22379		16811		19806		11020		15110		na	178	153	244	12811	15024	12379	14826
4.21_551.50		[M+H]+		551.504	ESI pos	4.209	9654		10258		15774		22347		13116		7961		4168		2947		2967		2570		3540		1661		933	774	860	645	7071	8569	6917	7728
2.55_929.69		[M+H]+		929.685	ESI pos	2.552	3163		3707		5028		5314		3666		4116		3980		4036		5914		5620		4823		2255		249	159	201	175	5167	5024	4097	4786
3.12_953.79		[M+H]+		953.79	ESI pos	3.122	8389		11401		13959		20083		10727		10334		6186		8668		11058		14484		9109		4885		129	113	130	212	9324	10371	8616	10743
3.26_869.72		[M+H]+		869.723	ESI pos	3.256	3111		3999		5178		12586		3263		3629		1678		4885		2632		3714		2255		3131		609	455	243	80	2664	2461	2483	3034
4.19_940.83		[M+H]+		940.832	ESI pos	4.192	14048		20023		19651		34748		27276		17680		10846		3198		6190		3158		4529		2418		666	399	589	271	10774	13415	11216	12393
2.97_931.78		[M+H]+		931.778	ESI pos	2.973	6700		8573		14212		28155		10629		7695		5664		9089		7597		9159		8235		5718		278	477	280	489	7788	9507	8066	9306
3.79_901.23		[M+H]+		901.233	ESI pos	3.793	5484		10303		12679		8106		9150		7978		4188		1660		4166		3908		7354		1406		na	na	na	na	7163	6887	5709	6270
3.69_279.23		[M-H]-		279.234	ESI neg	3.693	2226		2692		3533		10788		2991		2155		758		482		605		372		908		232		79	172	126	80	1839	1448	1695	1756
1.63_445.37		[M+H]+		445.367	ESI pos	1.631	5135		7067		5921		3016		5286		4850		3226		2155		4750		3488		3232		2773		231	398	457	282	4967	4638	4082	4059
3.66_1015.63		[M+H]+		1015.63	ESI pos	3.658	3354		3314		3008		2794		3181		3337		3412		3065		3474		3352		3934		2997		na	na	na	na	3635	3753	3104	3117
3.44_923.69		[M+H]+		923.695	ESI pos	3.438	4834		4155		5050		6500		4461		3361		4789		2318		3427		2605		2171		1559		135	128	117	237	3863	4811	4308	4767
2.94_929.76		[M+H]+		929.761	ESI pos	2.935	6780		10449		13695		34125		8703		8635		8516		27090		15171		26857		13138		22129		224	199	153	206	9495	10917	9521	11584
3.66_897.22		[M+H]+		897.22	ESI pos	3.661	6417		8795		10763		11504		12346		8270		3469		1820		4708		2628		5824		593		na	na	na	na	7093	8610	6930	7802
3.38_916.79		[M+H]+		916.794	ESI pos	3.38	17413		21057		25726		71276		27218		16570		7654		8099		11080		7443		9110		2869		263	297	418	142	13127	15184	12094	14519
3.35_898.69		[M+H]+		898.688	ESI pos	3.354	5581		9684		8834		11635		15218		8051		6096		2300		3646		1598		2216		1061		na	na	82	na	5411	6123	4853	5136
4.57_1235.06		[M+H]+		1235.06	ESI pos	4.571	2245		3084		2462		2408		1945		2874		2783		4234		3644		5185		4924		4167		206	152	146	146	3677	3674	3036	3861
0.17_1103.09		[M-H]-		1103.09	ESI neg	0.169	10550		9005		12172		10993		12636		10305		10033		12025		8582		7608		8707		9202		na	169	na	115	12556	10393	10754	10064
3.79_600.63		[M+H]+		600.631	ESI pos	3.793	16221		15821		14022		3504		16230		15907		9429		108		6452		4898		7674		153		na	na	na	na	12298	15740	13669	13818
3.36_897.75		[M+H]+		897.746	ESI pos	3.357	4871		6757		6900		10817		7865		5656		3728		5724		3863		5500		3969		4568		219	229	283	177	4749	5977	5018	5100
3.12_982.84		[M+H]+		982.843	ESI pos	3.123	4358		5636		6758		8170		5965		5841		3795		4574		6260		7464		4857		3143		397	281	529	298	5395	5131	4689	5985
2.26_337.27		[M+H]+		337.274	ESI pos	2.257	3498		4904		7522		15030		7164		5880		2801		1601		2697		2531		2547		1328		346	614	515	419	3322	3948	3164	3738
4.13_895.72		[M+H]+		895.716	ESI pos	4.135	16633		16353		20105		23036		18359		15767		8342		7507		7728		5366		7612		3723		549	198	691	466	14381	12836	11635	14504
2.95_902.75		[M+H]+		902.746	ESI pos	2.949	2868		4041		6090		9447		5069		4709		4292		6650		7172		6263		4091		4857		na	86	86	198	3976	4729	4109	4899
3.66_335.26		[M+H]+		335.258	ESI pos	3.659	8183		9665		9096		16003		10870		7813		5577		1940		4452		2713		4771		1779		329	267	143	179	7195	8042	6244	7356
2.85_967.73		[M-H]-		967.728	ESI neg	2.854	4929		8404		12015		37067		4542		4412		2903		7182		3919		3283		2830		3598		na	na	na	na	4877	4263	5095	4117
2.76_397.38		[M+H]+		397.384	ESI pos	2.763	2299		2610		3707		1821		3556		3329		3304		5495		4232		6409		4243		5410		78	67	106	132	3109	3514	3357	2762
4.51_1003.94		[M+H]+		1003.94	ESI pos	4.511	4696		4568		7798		16674		9634		4974		4915		1897		2885		2643		1895		1763		855	1119	1197	890	4678	4973	3877	4650
0.20_391.03		[M-H]-		391.033	ESI neg	0.203	14242		17609		15358		15680		14892		15313		16860		14071		18621		16901		13946		16653		na	1429	153	887	15000	18536	18054	15706
3.94_873.55		[M+H]+		873.553	ESI pos	3.94	21460		26078		25640		49341		22323		14545		11437		4816		14567		9962		9600		4644		125	na	na	na	17698	20573	20652	16862
4.29_959.86		[M+H]+		959.862	ESI pos	4.295	3760		4040		4550		1025		3374		4306		3628		4481		4266		3769		3227		3376		306	350	197	211	4662	5632	4496	4799
1.81_573.49		[M+H]+		573.487	ESI pos	1.813	4283		4102		5507		15194		6570		4270		2010		1574		3071		1665		3028		1312		648	357	184	534	3917	3831	3697	3087
3.99_964.70		[M+H]+		964.705	ESI pos	3.987	4391		3461		4478		3647		3882		3916		3922		3563		3652		4351		4665		1098		101	114	na	na	4752	4002	3879	3851
3.65_908.77		[M+H]+		908.769	ESI pos	3.655	7493		5569		4123		5918		7557		6610		5161		5084		5147		4833		5523		4584		145	108	323	108	7820	7259	6141	6696
4.46_875.79		[M+H]+		875.789	ESI pos	4.464	5003		5026		5955		12996		5221		4315		2801		2092		1639		1951		2277		1726		732	1973	1465	1129	2913	3459	2833	3413
2.87_1005.70		[M-H]-		1005.7	ESI neg	2.87	841		896		1142		724		572		1015		905		1052		2126		2513		2164		233		na	na	na	na	1299	1223	1264	1531
3.58_920.75		[M+H]+		920.752	ESI pos	3.576	105462		110504		112429		157060		117183		101224		88686		33724		41076		42942		38367		15798		810	790	1429	749	88851	105623	86225	103771
1.52_609.39		[M-H]-		609.394	ESI neg	1.516	2118		2601		2533		2763		2420		2373		2362		2571		2968		2777		3172		3199		na	na	na	na	2592	2587	2979	2316
3.02_718.62		[M-H]-		718.622	ESI neg	3.015	2285		1643		2242		1031		2793		3057		3736		4460		4805		4957		6360		6750		257	304	324	340	2942	2487	2821	3206
0.22_151.15		[M+H]+		151.148	ESI pos	0.217	3907		3937		2834		3133		2217		3380		4575		4020		3219		2652		2851		2528		496	315	450	349	3237	3030	2673	2599
2.76_852.65		[M+H]+		852.653	ESI pos	2.762	3544		3436		3693		2673		4331		4231		3727		5289		4372		5151		4589		4658		112	87	na	132	5381	4355	4454	4429
3.95_936.69		[M+H]+		936.688	ESI pos	3.954	4788		5382		4777		605		4163		5603		7088		5808		6323		6420		6116		5069		114	na	128	na	5423	6412	5120	5285
3.38_887.70		[M-H]-		887.703	ESI neg	3.378	1135		1385		1857		920		1420		1756		1536		4847		3224		4322		4060		4277		na	na	na	na	2419	1996	2015	1944
3.48_871.68		[M+H]+		871.679	ESI pos	3.484	4144		5678		5534		8511		6997		4681		3227		1680		3058		1358		2115		914		133	108	na	na	4447	3735	4077	3501
2.38_949.72		[M+H]+		949.724	ESI pos	2.384	2194		4902		3766		2885		3192		3770		3673		2709		4446		4067		2718		2273		na	193	171	210	3348	4176	3530	4042
4.08_901.51		[M+H]+		901.505	ESI pos	4.084	15736		15639		25174		20451		15078		19701		7994		6119		8567		5191		6962		1592		na	126	na	na	13470	14945	17045	16602
2.97_932.78		[M+H]+		932.779	ESI pos	2.971	2891		3296		5424		10959		3805		3357		2729		3301		3517		4006		3378		2709		217	386	249	158	3100	3603	3247	3916
3.66_898.64		[M+H]+		898.639	ESI pos	3.662	2617		5137		7429		9316		8981		4629		1459		1153		2396		1363		3267		719		na	na	na	95	4842	4596	4730	5759
3.94_900.36		[M+H]+		900.356	ESI pos	3.935	33498		31825		32566		58146		35767		13212		10196		6305		8380		4435		7944		3381		na	na	na	na	14721	16365	13262	13090
1.24_403.32		[M-H]-		403.321	ESI neg	1.242	934		1546		1295		907		1470		1346		865		2007		2177		2181		2550		2008		25	62	36	53	2118	1747	1972	2248
1.02_326.31		[M+H]+		326.305	ESI pos	1.023	1526		2473		2660		2124		2559		4357		4875		2316		5030		8114		5672		7888		208	57	96	na	3370	3920	3113	3202
3.43_277.22		[M+H]+		277.216	ESI pos	3.429	6364		6675		9182		6595		8410		9525		8622		14456		12584		17870		11994		15147		275	390	531	513	6683	8241	6723	7810
0.72_284.33		[M+H]+		284.332	ESI pos	0.724	6489		6195		5212		9944		7112		4705		5087		13340		7662		10903		641520		6644		4549	4880	4597	5081	10712	12156	10320	12946
3.65_197.08		[M+H]+		197.081	ESI pos	3.648	1493		1702		1550		728		1164		2377		2658		5823		3728		5500		3502		4942		316	228	273	141	3095	3197	2693	2560
4.56_1176.06		[M+H]+		1176.06	ESI pos	4.556	3016		3266		3339		1516		1833		3250		3380		4919		4227		4576		3539		5577		169	167	350	171	4001	4318	3421	4343
3.20_884.80		[M+H]+		884.798	ESI pos	3.199	3770		6753		7167		6466		6372		5714		3821		1713		4102		2408		2416		1081		617	250	325	277	4614	5002	3863	4369
3.25_856.70		[M+H]+		856.703	ESI pos	3.252	6394		9046		14254		9314		9232		13362		11542		23057		24027		28867		23682		20795		160	273	85	167	9650	10814	9836	12128
3.97_924.85		[M+H]+		924.855	ESI pos	3.969	9422		11734		16112		24267		17462		11123		7550		2127		3690		1983		3086		2468		840	672	446	840	12112	12416	10680	9857
1.68_613.41		[M-H]-		613.41	ESI neg	1.683	13440		13902		18475		13399		14909		17652		15524		23000		19271		18466		21825		21894		161	240	163	241	20634	16415	17554	16805
4.22_903.24		[M+H]+		903.241	ESI pos	4.216	7159		7772		4617		26172		9219		5771		1850		1069		1109		753		1837		537		na	na	na	na	3902	3536	4065	4574
3.70_842.72		[M+H]+		842.721	ESI pos	3.697	6008		4832		5352		9626		7936		3893		2381		1528		1947		1644		1772		994		318	101	353	309	4558	5291	4652	4078
3.94_617.51		[M+H]+		617.513	ESI pos	3.939	4890		4579		6309		8926		6159		4468		3087		2157		3165		2374		2784		1560		203	109	205	201	4776	4917	4045	4010
1.68_611.41		[M-H]-		611.412	ESI neg	1.676	40404		42978		55249		40336		44684		51652		47945		66251		55768		55471		63244		62232		284	494	418	771	60746	47981	50614	50649
3.95_955.85		[M+H]+		955.853	ESI pos	3.953	4661		6120		4345		2382		5959		4689		4567		4944		5651		4762		5396		4579		663	410	524	624	4842	4810	4586	5798
3.19_613.48		[M+H]+		613.482	ESI pos	3.195	23090		29199		30402		46431		23895		26791		15816		10256		21466		20247		23446		6968		na	78	183	82	24276	28893	22749	27148
3.30_973.77		[M-H]-		973.773	ESI neg	3.296	1347		2148		2803		8160		1406		1105		521		2383		797		764		726		1012		na	na	na	na	1074	891	856	883
1.82_414.35		[M+H]+		414.349	ESI pos	1.822	3744		4585		4917		4356		6543		4660		2749		3692		3833		4142		3395		2882		109	278	194	183	3722	4399	3405	3866
0.91_327.29		[M-H]-		327.291	ESI neg	0.905	906		1940		1083		687		1103		1335		787		1729		2000		2851		2585		1687		20	46	62	89	1459	1885	1808	1753
2.26_653.45		[M+H]+		653.455	ESI pos	2.258	10518		11916		16517		25224		15204		13752		7019		3806		7073		5214		6105		2793		215	125	78	233	9400	10937	8541	9088
2.83_951.74		[M+H]+		951.737	ESI pos	2.831	3406		6144		9350		25584		5656		4296		3825		5660		3954		4298		2715		4082		99	211	75	na	4281	3675	3298	3868
3.78_924.85		[M+H]+		924.846	ESI pos	3.782	5628		6332		1580		3202		5265		5281		5037		4450		5081		4753		6425		2944		670	454	600	751	3722	4862	4302	4322
2.99_938.76		[M+H]+		938.765	ESI pos	2.99	5925		7309		13121		15057		8616		8763		8039		7154		11594		10484		7571		5118		145	223	106	309	8110	9272	7579	9542
3.79_898.84		[M+H]+		898.839	ESI pos	3.79	65115		73489		76607		56941		59937		62800		166171		130443		166634		159526		178305		93184		374	891	519	687	73230	87685	90862	75002
4.07_945.87		[M+H]+		945.867	ESI pos	4.069	6994		6519		6735		4427		6042		7061		7367		6652		6877		5028		7099		4521		484	445	478	566	7483	7101	6826	8680
3.20_973.66		[M+H]+		973.663	ESI pos	3.196	3855		4217		4467		5548		4730		3568		2342		1843		2683		2809		3091		1136		na	na	na	80	3472	4074	3150	3734
0.81_361.24		[M-H]-		361.237	ESI neg	0.813	931		1556		2635		3472		1810		3329		617		1042		1209		2435		2460		726		na	na	na	15	1410	1402	1482	1752
4.09_901.66		[M+H]+		901.657	ESI pos	4.095	36834		49740		28158		52426		36426		31291		10005		7520		10543		7297		12560		2288		na	na	na	na	18140	19192	23114	19419
1.79_648.52		[M+H]+		648.52	ESI pos	1.788	11213		15946		23217		34848		16928		17701		10047		4016		14725		9924		12029		2289		220	325	217	105	11090	12842	10498	13130
4.11_874.85		[M+H]+		874.847	ESI pos	4.107	60897		80890		78900		78461		69494		81650		126288		98666		106312		76692		118869		47010		477	614	739	629	70169	80186	84901	91279
4.56_1177.07		[M+H]+		1177.07	ESI pos	4.559	2942		3117		3279		1793		2083		3010		3193		3873		3543		3909		2899		4033		960	727	593	565	3400	3780	3134	4013
3.52_909.69		[M+H]+		909.692	ESI pos	3.52	3869		3669		3958		3775		3766		4832		2789		2503		3030		2771		3879		1365		na	na	na	na	4114	3972	3180	3752
3.12_945.68		[M+H]+		945.679	ESI pos	3.119	3952		5172		3937		6517		4858		3765		4919		1988		2746		2633		2308		1398		na	na	na	87	3676	4379	3574	4387
2.87_912.74		[M+H]+		912.739	ESI pos	2.872	3421		6034		4026		5651		5576		3966		2688		2363		3133		2629		2140		1570		357	304	202	165	3769	3739	3457	2943
3.00_929.70		[M-H]-		929.703	ESI neg	3.003	2669		3209		4077		4102		3470		3403		2513		2733		4677		4728		3444		1832		na	na	na	na	3545	2998	3247	3868
2.72_969.74		[M-H]-		969.742	ESI neg	2.718	939		1077		1111		1352		1106		1319		732		850		1315		1579		2041		692		na	na	na	na	1726	1347	1579	1429
3.36_575.50		[M+H]+		575.504	ESI pos	3.36	10911		13761		15913		20688		13045		12198		8105		4112		9089		6995		8370		2376		310	336	426	293	10110	11517	9469	12012
3.65_898.67		[M+H]+		898.668	ESI pos	3.648	4025		3398		10167		14490		6074		5385		2845		483		2799		635		2812		863		232	na	na	128	5758	4978	4417	5302
0.52_512.42		[M+H]+		512.416	ESI pos	0.524	1427		1276		1080		1711		1119		1118		1406		1275		1234		1810		52161		1711		1413	1200	1603	930	1280	1682	1518	1518
3.36_968.83		[M+H]+		968.827	ESI pos	3.362	3721		3843		4396		5228		3708		3307		3053		2002		2953		3164		3677		1743		264	443	217	348	3151	3830	2987	3451
2.45_944.75		[M+H]+		944.751	ESI pos	2.446	2585		4291		6725		11030		3754		4067		2193		4732		4675		5996		3407		3043		273	228	212	173	3563	4446	3527	3945
2.01_586.46		[M-H]-		586.462	ESI neg	2.011	1559		1391		1972		1765		2206		3355		2436		3641		5407		6489		7497		5938		na	na	na	na	2343	1796	2205	2081
4.08_901.48		[M+H]+		901.476	ESI pos	4.076	17069		27634		34550		35542		27146		21079		6547		6249		6309		3690		12485		1712		na	na	na	na	14855	18644	15525	18047
2.26_335.26		[M+H]+		335.258	ESI pos	2.256	3493		4050		6489		13837		6699		5629		2542		1173		2536		1788		2419		1031		370	323	278	233	3131	3618	2877	3609
4.09_903.50		[M+H]+		903.495	ESI pos	4.088	7792		7041		12936		20661		11085		4680		1983		2451		2252		1986		1619		811		na	na	na	na	5201	5808	5603	6731
4.35_927.77		[M+H]+		927.765	ESI pos	4.353	6231		6184		8307		11585		7368		5157		2750		2488		2109		1640		4171		1202		115	286	132	144	4667	4993	3981	5166
3.58_967.70		[M+H]+		967.699	ESI pos	3.583	7561		8163		5590		9721		6268		4585		4661		4256		2631		3517		3619		1955		115	105	112	213	5562	6767	5463	6590
4.35_603.54		[M+H]+		603.535	ESI pos	4.35	29272		38279		63482		159983		54637		26832		8620		6464		6886		3662		10097		3186		118	328	671	555	18678	22395	18430	22626
2.64_337.27		[M+H]+		337.274	ESI pos	2.639	7054		7575		11908		22942		10280		7069		2437		2185		3016		2652		2016		1619		643	261	346	433	5724	6466	5030	5292
2.83_945.66		[M+H]+		945.658	ESI pos	2.83	2687		4871		6525		18070		3835		3197		2472		3762		2940		2401		1846		2492		na	na	na	na	2505	2564	3183	2706
3.65_263.24		[M+H]+		263.237	ESI pos	3.655	14381		15397		18390		29894		18144		12405		8594		3153		7204		4619		8359		2697		na	275	93	na	10655	13907	12197	13144
3.82_872.17		[M+H]+		872.17	ESI pos	3.816	4079		4027		6183		7105		4394		4071		4430		1410		3069		1891		1869		868		na	na	na	91	4467	4500	3505	4371
3.66_870.81		[M+H]+		870.809	ESI pos	3.664	5029		9525		7554		20006		18826		12493		6953		2562		5321		2965		2706		2099		593	136	557	353	5416	6537	5789	5034
3.03_995.84		[M+H]+		995.844	ESI pos	3.028	6177		8304		8829		10913		8653		7503		5736		4382		8235		7035		6407		3344		338	360	391	172	5660	7404	6376	6873
2.86_686.59		[M-H]-		686.588	ESI neg	2.864	954		1577		1382		863		1672		2560		2520		2528		6500		6184		7915		5773		23	17	na	20	2611	2245	2936	2468
0.21_316.04		[M-H]-		316.039	ESI neg	0.207	4234		4163		3621		2469		3782		3913		3859		3250		3295		3195		2503		3250		na	351	15	263	3175	4199	3749	3810
2.96_906.68		[M-H]-		906.682	ESI neg	2.961	1584		2470		2311		1870		1928		2343		1573		3646		4923		3714		4178		3566		na	13	na	na	3407	2710	3526	3142
0.22_473.24		[M-H]-		473.24	ESI neg	0.216	956		1230		1300		1012		1113		1425		1229		1781		1812		1568		2298		1327		27	57	41	29	1136	912	960	894
3.83_279.23		[M-H]-		279.234	ESI neg	3.829	2079		2269		2855		11900		3188		2028		701		389		628		439		1080		289		87	231	170	155	1964	1591	1541	1801
4.47_897.77		[M+H]+		897.772	ESI pos	4.467	9829		9477		12728		32167		10649		9015		4513		2993		4924		3631		4904		3098		1155	2991	3431	1705	5787	7659	6915	6999
4.07_265.25		[M+H]+		265.252	ESI pos	4.074	9470		9130		12168		18998		12991		6985		3667		3292		2848		1950		3976		1141		116	289	150	356	6092	7947	6729	7349
2.19_184.07		[M+H]+		184.074	ESI pos	2.195	3507		4495		4533		14478		4915		3774		2494		943		2577		1849		2011		1617		139	61	228	71	3778	3836	4803	4251
2.77_830.67		[M+H]+		830.672	ESI pos	2.766	6631		7943		7463		7999		6925		8392		6583		11746		8864		9478		8780		7772		362	166	397	168	7938	9541	7679	9462
2.94_895.67		[M-H]-		895.668	ESI neg	2.94	1101		1833		2717		2916		2321		2392		2337		2802		4812		3824		4865		3081		na	18	na	na	2428	2163	2404	1887
3.94_900.52		[M+H]+		900.524	ESI pos	3.939	22205		28432		28513		36636		24681		25474		15021		10954		9883		6326		16521		3582		na	na	na	na	22610	23503	18730	24571
1.53_445.37		[M-H]-		445.369	ESI neg	1.532	1470		2005		1763		1154		1693		2016		1281		2255		2003		2089		1850		2144		na	106	106	54	2432	1853	2124	2046
3.13_947.72		[M-H]-		947.719	ESI neg	3.132	2790		4119		4570		16232		2469		1739		928		4777		1210		1139		1230		1645		na	na	na	na	2106	1751	1732	2138
3.58_941.68		[M+H]+		941.683	ESI pos	3.578	5297		5776		3815		5740		4081		3653		4316		2868		2259		3688		2426		1601		132	na	na	na	4137	4634	3775	4884
0.23_225.15		[M-H]-		225.151	ESI neg	0.227	3384		6866		2935		3711		4320		3920		2594		4036		5441		5307		3688		2280		68	194	91	168	4040	5187	5069	5189
1.63_411.39		[M-H]-		411.385	ESI neg	1.63	157047		172046		185925		164612		199027		146608		130998		237171		130048		214812		196909		160445		630	981	521	1295	204984	182323	177785	226897
0.22_174.03		[M-H]-		174.032	ESI neg	0.22	2506		1073		1665		2430		2519		1874		4442		2191		978		971		1156		1080		31	49	64	60	1103	1360	1231	1438
3.20_951.78		[M+H]+		951.776	ESI pos	3.196	40050		47318		47998		64603		43245		45170		27833		20256		36189		35549		41000		13961		na	223	107	110	39113	47245	36805	44617
0.17_475.04		[M-H]-		475.037	ESI neg	0.174	10810		9811		10963		11015		11865		9604		9585		6722		9499		9739		8541		9958		na	1190	121	1097	8839	8980	10859	10896
4.60_843.72		[M+H]+		843.724	ESI pos	4.6	77728		109933		79658		30708		67354		109339		86255		172970		134009		190744		98310		136635		529	260	713	605	109337	129850	101102	124875
0.22_475.04		[M-H]-		475.042	ESI neg	0.221	10810		5935		10963		11015		11865		6539		6763		6528		8034		8222		7878		8054		na	1190	14	1097	8832	8980	10859	10896
1.63_459.38		[M-H]-		459.384	ESI neg	1.629	2915		2919		3254		2001		3083		2498		2457		4263		2284		3398		3117		3032		29	60	13	23	3770	2932	3250	3694
3.63_860.73		[M+H]+		860.73	ESI pos	3.635	3236		3742		2759		5753		3726		4139		2698		3547		3315		3642		3042		2595		93	218	184	230	3555	3154	4174	3666
2.76_831.67		[M+H]+		831.669	ESI pos	2.762	3149		3545		3719		3457		3247		4390		3391		5665		5239		5339		4782		4421		406	169	330	364	3744	4865	3990	4113
3.43_832.70		[M+H]+		832.702	ESI pos	3.426	3087		3792		8198		6144		4668		6712		6874		13497		12624		16848		12261		12320		163	22	281	86	7527	9578	9050	9865
0.21_577.14		[M-H]-		577.137	ESI neg	0.207	3742		3208		4647		2869		2581		3698		3825		3227		3568		3041		2596		3034		38	152	91	238	2488	2903	3298	2821
4.60_1255.17		[M+H]+		1255.17	ESI pos	4.596	2634		2964		3767		2436		3722		4918		4330		6604		7391		8010		6081		6361		na	195	315	182	4324	4743	4474	5565
2.60_718.58		[M-H]-		718.58	ESI neg	2.597	1063		1532		965		874		1318		1184		1107		2303		2449		4929		3920		3787		41	16	57	53	2551	2054	2515	2721
1.97_835.53		[M+H]+		835.533	ESI pos	1.968	3542		4309		4079		12214		5097		3537		2048		1804		1776		2013		2224		1018		58	62	68	59	3224	3896	3055	3746
3.81_575.55		[M+H]+		575.554	ESI pos	3.809	5211		5399		8908		10913		7202		5646		3366		1729		2690		1328		2154		1079		125	125	94	135	4693	4335	3655	4764
3.07_778.62		[M+H]+		778.624	ESI pos	3.071	3552		4235		3674		2461		3629		4500		4688		5476		4379		4571		4571		3975		133	303	129	256	4783	5680	4431	5520
3.19_555.44		[M+H]+		555.44	ESI pos	3.194	3347		4352		4631		7418		3824		4586		2393		1198		3093		2962		3580		970		160	171	227	279	3477	4543	4415	4009
3.87_896.83		[M+H]+		896.834	ESI pos	3.868	74728		73985		87589		37474		66571		84413		54118		65248		76695		70814		84785		93204		439	594	689	637	71734	86710	72467	66419
3.51_862.75		[M+H]+		862.751	ESI pos	3.511	8630		9599		13680		12130		9295		8996		6596		3162		7242		5084		5873		2102		215	413	119	298	7053	8636	6963	8536
4.46_896.77		[M+H]+		896.771	ESI pos	4.464	15315		15592		20327		51745		16758		15597		7458		4631		6484		6001		7829		4898		1592	3966	3583	3236	8999	11969	10219	10454
4.14_926.81		[M+H]+		926.811	ESI pos	4.14	134024		213344		531227		793067		273131		191219		260880		35373		66186		38598		60801		17881		2787	3245	2603	2921	118020	155371	128596	137799
3.12_945.74		[M-H]-		945.744	ESI neg	3.118	2514		4497		5038		13746		2450		2114		1037		4293		1454		1866		1309		2018		na	na	na	na	2283	1758	1926	2182
1.80_532.47		[M+H]+		532.473	ESI pos	1.804	5270		9362		7275		10929		7267		5617		4904		8171		5300		7675		6577		7205		331	441	399	403	4821	6388	5417	5800
2.96_945.70		[M-H]-		945.7	ESI neg	2.959	4750		7609		8225		24365		4976		4369		1618		7305		3324		2786		2438		3662		na	na	na	na	3763	2885	3742	3527
3.26_951.70		[M+H]+		951.705	ESI pos	3.259	6785		8940		10201		27482		6331		4892		3142		7979		3787		3226		2756		4032		161	na	na	119	4221	5014	3914	4907
2.97_930.72		[M-H]-		930.722	ESI neg	2.973	811		1276		1459		1393		1264		1102		712		1590		2876		2190		1843		1384		na	na	na	na	1484	1587	1930	1586
0.21_341.11		[M-H]-		341.111	ESI neg	0.206	3769		3628		4031		17991		5218		2843		2451		522		1478		643		767		629		153	452	168	480	1789	2293	2294	2325
2.26_615.50		[M+H]+		615.499	ESI pos	2.256	5058		5636		8883		19984		8549		7711		3157		1903		4204		3201		2941		1483		862	512	749	578	4284	4578	5433	4253
2.91_944.71		[M+H]+		944.711	ESI pos	2.913	4565		7366		7006		9432		4937		7580		5991		4707		9937		8888		6757		3656		na	114	94	103	5271	6498	5542	6735
3.27_969.75		[M+H]+		969.75	ESI pos	3.275	13789		12875		11538		16566		10229		10600		11418		4542		7070		7216		7173		3186		181	195	82	220	12245	12913	10841	14449
1.88_775.53		[M-H]-		775.534	ESI neg	1.877	1663		1842		1769		1584		1379		2039		1896		2598		2473		2369		3359		2589		16	na	18	na	2744	2394	2139	2163
0.22_387.20		[M-H]-		387.203	ESI neg	0.218	1049		1454		920		806		825		1314		1870		1260		1040		732		773		654		51	na	17	na	812	1052	993	1065
2.21_656.61		[M+H]+		656.609	ESI pos	2.212	1994		3606		2696		3339		3770		2686		2345		2089		1462		1378		1062		1480		222	336	391	281	4300	3640	3223	3786
3.36_851.71		[M+H]+		851.714	ESI pos	3.359	6945		7519		8982		11577		7164		7026		4459		2685		5440		4631		6120		1309		158	311	106	214	5984	7108	5565	7018
4.35_607.56		[M+H]+		607.564	ESI pos	4.348	9797		11047		18046		45027		14645		8557		3948		2589		3279		2126		3707		1456		603	203	465	421	5751	7497	6183	7002
0.18_1085.08		[M-H]-		1085.08	ESI neg	0.176	1153		1170		1612		1810		1794		1288		1298		1256		1080		936		1102		907		na	100	na	35	2367	1949	2237	1827
3.36_795.63		[M+H]+		795.628	ESI pos	3.356	3002		2095		2209		1177		1959		2378		2745		3918		3506		4220		3268		3947		na	86	121	na	3669	3188	2734	3273
3.82_919.82		[M+H]+		919.817	ESI pos	3.821	4233		4994		4527		4582		3966		4797		3481		3062		4203		2939		4079		2054		680	632	505	467	4338	4227	3381	3615
3.03_873.70		[M+H]+		873.696	ESI pos	3.034	7678		10281		11187		14274		10221		8705		7205		2726		7701		5017		6082		1717		80	79	149	na	7203	9420	7600	7947
3.66_909.77		[M+H]+		909.765	ESI pos	3.659	3589		6471		3846		5007		11939		9978		8379		4693		8271		4577		5961		3228		207	107	93	301	8076	6712	9013	8364
2.87_595.47		[M+H]+		595.472	ESI pos	2.872	5592		9732		8095		8733		10292		7489		6025		3048		4874		3039		2794		2082		124	na	161	91	5422	5689	4685	6290
3.79_999.79		[M+H]+		999.787	ESI pos	3.794	5230		5456		5568		7540		6529		5239		4847		3300		4256		3548		4331		2799		99	152	na	na	5098	5864	5642	4441
2.05_909.90		[M-H]-		909.899	ESI neg	2.054	2003		2407		2442		1962		2987		2041		2131		3236		2982		4500		3639		3200		159	174	153	216	3433	3229	2886	3854
1.56_675.68		[M+H]+		675.676	ESI pos	1.559	5861		5275		9740		8307		16546		6133		6461		16737		14337		6697		83492		6048		9909	4381	10668	4490	13669	12507	15126	11414
2.87_902.75		[M+H]+		902.745	ESI pos	2.865	4260		4463		9059		11974		5365		5251		4978		6233		7489		8406		5028		4222		476	172	236	285	5815	5819	5728	7273
4.23_599.50		[M+H]+		599.503	ESI pos	4.234	9349		11925		14146		33487		15018		10836		4694		1973		3655		2957		3366		1478		278	580	279	139	7070	8178	7504	9301
3.94_873.14		[M+H]+		873.137	ESI pos	3.939	12088		11440		11129		45855		12093		14306		8378		4082		8048		4566		7806		3686		na	na	na	na	10364	8703	11627	9707
2.97_953.76		[M+H]+		953.756	ESI pos	2.971	7124		12969		17206		54318		9132		7559		5454		11818		6708		7332		5240		7615		135	113	83	218	6030	7497	5734	6810
0.23_207.14		[M+H]+		207.138	ESI pos	0.225	4667		8197		5659		5253		6394		7602		6617		9442		7844		6490		6156		5509		968	844	983	1272	6368	8230	6505	6801
3.12_895.76		[M+H]+		895.755	ESI pos	3.119	3082		4036		5041		6975		3579		3994		3258		4210		4705		6883		3468		3500		315	376	318	195	3992	4489	3422	3580
2.96_969.75		[M-H]-		969.745	ESI neg	2.963	9852		17884		19047		57627		10895		9414		3139		16918		6721		6952		5545		7877		na	na	na	na	8311	6579	8158	8874
3.76_738.70		[M-H]-		738.699	ESI neg	3.756	602		446		541		144		764		415		797		1155		1269		2109		1520		1928		na	na	na	na	1138	1053	1236	920
3.16_726.64		[M+H]+		726.639	ESI pos	3.161	3758		4646		4927		3437		4518		5035		4878		7591		8008		10242		6501		8083		213	359	362	242	4056	5294	4174	4543
4.35_579.54		[M+H]+		579.535	ESI pos	4.346	7712		8256		15597		30867		11645		5734		2345		2153		1920		1552		3362		1804		655	345	784	613	4395	5891	5656	5498
3.12_998.86		[M+H]+		998.863	ESI pos	3.122	4477		5566		7082		7053		6298		5252		3374		3774		5239		7261		4430		2753		533	162	314	262	4371	5559	4284	4645
3.43_735.64		[M+H]+		735.639	ESI pos	3.433	4994		4218		6714		2801		5262		6314		6320		11115		10738		13759		9050		12751		410	90	188	163	5471	6470	4844	5303
2.52_963.70		[M-H]-		963.698	ESI neg	2.52	767		1831		1729		2421		1244		1331		891		1145		1099		1941		1679		738		na	na	na	na	1209	947	943	985
4.60_1359.19		[M+H]+		1359.19	ESI pos	4.597	3856		4817		4341		1775		3225		5497		4153		8821		6487		8371		5010		6231		na	na	na	143	5578	6210	4609	5895
2.02_782.63		[M+H]+		782.627	ESI pos	2.019	4911		6396		8360		41109		12040		5535		2835		1500		3230		1815		1986		891		194	163	379	183	5158	5373	4149	5560
4.62_1325.25		[M+H]+		1325.25	ESI pos	4.618	2228		2412		3082		2018		3028		3908		4140		5052		4249		5557		4495		4300		200	153	208	168	3707	4414	3282	3697
3.66_896.28		[M+H]+		896.281	ESI pos	3.658	44429		48150		25373		26076		59326		26050		9536		3460		14668		4415		11758		1978		na	na	na	na	38441	41116	31084	41048
2.09_951.58		[M-H]-		951.583	ESI neg	2.094	580		1315		2605		1547		1431		3214		1472		3931		3600		3454		5128		3261		na	na	18	na	3274	3260	2572	2701
4.49_397.38		[M+H]+		397.383	ESI pos	4.485	2931		2591		4375		2970		3921		5162		4435		7204		6597		9263		5639		7672		na	na	na	na	4310	4097	3318	4445
2.94_871.62		[M-H]-		871.623	ESI neg	2.938	818		1138		1686		1126		1546		1535		1842		1969		3171		2323		3280		2790		na	14	27	17	1611	1567	1579	1215
4.35_633.58		[M+H]+		633.581	ESI pos	4.352	4798		5835		9259		23585		9379		5263		1888		1341		1690		1469		1575		995		319	491	245	290	3490	4138	3188	4095
3.42_949.71		[M+H]+		949.711	ESI pos	3.423	27829		28473		22110		41771		22491		21386		18170		11370		12309		16759		13604		6121		462	156	727	376	21977	27159	20707	25363
3.96_627.54		[M+H]+		627.535	ESI pos	3.96	5427		6238		8020		11942		8458		6827		3858		1672		3791		2704		2981		1393		283	137	174	na	5107	6351	5073	4890
2.50_927.75		[M+H]+		927.748	ESI pos	2.497	3516		4154		7109		9666		4757		4681		4698		4562		7811		9638		5369		3272		158	73	na	340	4423	5873	4723	4944
3.25_988.85		[M+H]+		988.855	ESI pos	3.252	3062		5376		5839		14497		3496		2894		2129		4644		2504		2693		2316		3543		237	319	346	191	2094	2759	2526	2779
2.62_827.66		[M+H]+		827.655	ESI pos	2.62	4927		5430		4667		10696		4550		3656		2839		1836		2699		2142		2485		1438		83	79	269	164	3927	4624	3572	4626
2.69_1010.84		[M+H]+		1010.84	ESI pos	2.694	1877		2702		3702		6699		3228		3195		2088		2003		4050		3598		2916		2122		278	188	30	75	3067	3631	3804	2938
1.28_301.00		[M-H]-		301.004	ESI neg	1.277	2669		2633		2790		2162		2973		2594		2700		4414		3726		2537		3259		4015		25	991	166	241	5621	4273	5609	5557
4.08_938.82		[M+H]+		938.815	ESI pos	4.078	3195		6396		4505		3684		6990		5316		4560		1897		2524		1610		1865		1082		277	377	237	125	3744	4431	3532	3348
3.25_948.74		[M+H]+		948.742	ESI pos	3.245	4983		6861		7014		9630		4731		5624		4375		7091		6304		8664		7514		4172		236	221	131	166	4639	5357	4901	6149
3.16_397.38		[M+H]+		397.382	ESI pos	3.156	4053		4715		6335		4160		5718		6659		5239		9576		8812		13082		7722		10301		na	129	na	na	4450	5612	4408	5395
4.35_907.84		[M+H]+		907.843	ESI pos	4.348	37883		43946		69445		155337		60216		31080		10260		8857		8298		5495		13331		3918		1086	981	655	896	22536	27467	21697	27552
2.08_541.47		[M+H]+		541.472	ESI pos	2.082	2818		5188		4362		5416		3801		3953		2347		1874		1721		1393		1490		1143		na	231	163	333	3950	4346	3825	5030
3.51_261.22		[M+H]+		261.222	ESI pos	3.508	9300		10010		13751		24393		14774		9284		5761		1656		4621		1563		3287		1085		na	na	47	na	6566	8173	6458	8047
2.64_815.65		[M+H]+		815.652	ESI pos	2.638	10145		8633		5886		7829		6810		5939		5396		5818		4351		7340		4739		4495		449	592	319	669	8015	9695	8094	10282
1.60_621.44		[M-H]-		621.438	ESI neg	1.598	828		997		1019		793		953		1083		872		1535		1077		1219		1355		1181		30	na	13	na	1496	1117	1213	1341
3.79_899.71		[M+H]+		899.71	ESI pos	3.794	44080		44829		48450		87705		56635		9386		19518		6377		23155		12558		18879		5176		121	332	406	131	33367	24702	28975	31669
3.65_895.62		[M+H]+		895.622	ESI pos	3.645	32599		49915		63229		77785		45396		82221		18535		10816		25019		19574		25918		5711		104	na	100	93	49289	36331	43394	40836
3.51_894.42		[M+H]+		894.421	ESI pos	3.51	7081		12215		17601		30082		21378		10778		5604		917		4258		872		1857		481		na	na	na	na	7601	7795	6497	8891
3.03_908.80		[M+H]+		908.797	ESI pos	3.032	30880		40821		43299		44861		40246		36320		25980		9831		27642		10761		23232		3675		410	282	601	506	32437	35900	26400	33948
4.36_601.52		[M+H]+		601.519	ESI pos	4.355	5172		5066		9934		25048		9073		5076		2287		1460		1843		1252		1742		1035		374	177	520	181	3663	4302	3144	3692
3.03_952.78		[M+H]+		952.784	ESI pos	3.026	4958		4750		5766		8747		5245		5376		4087		3503		5068		4907		4370		2675		208	193	338	na	5773	4889	4462	5819
3.36_914.66		[M+H]+		914.657	ESI pos	3.357	4038		6373		6482		8038		7934		5516		4436		2083		3667		1430		1530		1595		na	na	na	na	3925	4754	3500	4097
3.58_925.71		[M+H]+		925.711	ESI pos	3.575	11304		10203		8753		12913		8530		7334		7850		4812		4351		5714		4633		2884		na	239	145	199	8131	9446	7424	9804
2.50_850.62		[M-H]-		850.621	ESI neg	2.504	9788		13443		17360		24495		16415		16250		10215		21645		16512		19473		22446		18272		14	25	28	20	20117	16949	15474	20091
4.21_903.55		[M+H]+		903.545	ESI pos	4.214	5130		6923		11655		18502		13733		6718		1509		903		877		861		1911		611		na	na	117	na	6251	6617	5454	7444
4.34_880.82		[M+H]+		880.823	ESI pos	4.345	34991		35378		69909		129603		53323		26542		10188		8207		7933		5349		9222		3709		1068	906	1150	927	20012	23783	19089	24863
3.80_899.64		[M+H]+		899.638	ESI pos	3.796	23624		36510		42689		80104		46356		32747		16077		8962		19469		12834		18115		4504		107	na	na	na	27943	30350	30334	22760
3.29_999.88		[M+H]+		999.879	ESI pos	3.293	6154		4801		7146		10361		5025		4842		3051		5154		5313		5303		4399		2667		709	611	660	548	5089	4442	4039	5379
3.98_281.25		[M-H]-		281.25	ESI neg	3.984	1238		1257		1759		4843		1787		1038		676		684		550		607		857		449		490	456	417	398	1176	1020	865	970
0.20_533.07		[M-H]-		533.066	ESI neg	0.199	1738		1698		1661		1433		1641		1826		1727		1507		1463		1273		1058		1382		na	95	15	27	1050	1415	1143	1234
0.24_469.01		[M-H]-		469.007	ESI neg	0.244	5514		8542		7640		4448		7244		10427		9797		13156		11185		13811		16025		13266		na	88	13	45	9731	7281	8567	7756
3.19_595.47		[M+H]+		595.472	ESI pos	3.194	7317		8601		9784		13932		8317		7439		4490		3443		5932		5464		7500		2238		88	91	na	145	6243	8559	7225	7482
4.08_902.49		[M+H]+		902.488	ESI pos	4.077	22168		15690		21308		40648		13190		20304		6129		4573		9605		3519		11161		1498		na	na	104	na	15709	17823	12930	15476
3.47_901.72		[M-H]-		901.716	ESI neg	3.47	3287		4097		5014		4158		4820		4734		3407		7004		5453		6267		6356		5573		17	22	na	na	6104	4631	5633	4844
2.49_931.70		[M+H]+		931.695	ESI pos	2.492	2021		2896		3737		4786		2655		3330		3514		4194		4297		5873		3816		2321		78	111	na	72	3708	3774	2912	3966
3.01_730.61		[M-H]-		730.615	ESI neg	3.012	3264		3685		5242		3335		6227		10514		10426		10916		18191		13684		18546		16520		14	29	23	32	6734	5404	6337	7411
0.17_983.11		[M-H]-		983.106	ESI neg	0.168	5410		6386		6757		7280		5433		4913		5021		5395		7923		6714		7067		8216		na	118	na	136	6922	5404	6482	7389
1.53_795.75		[M-H]-		795.75	ESI neg	1.532	1344		2510		1974		969		1694		1736		966		3525		2581		3995		1979		2790		na	na	na	15	2585	2521	2292	3098
4.08_903.29		[M+H]+		903.293	ESI pos	4.082	6865		6627		8413		11744		8484		6562		2747		2346		2395		2226		3846		1245		na	105	na	na	5031	5955	5270	6683
0.21_411.18		[M+H]+		411.178	ESI pos	0.215	18426		31474		15044		21166		9692		14342		18917		22452		14823		12100		12607		11912		344	183	131	142	9622	12447	9890	11937
3.61_874.70		[M+H]+		874.697	ESI pos	3.614	408		6008		7630		10635		9140		4664		3184		2172		3396		2274		354		1049		99	93	na	na	4620	5468	3993	4957
4.21_903.19		[M+H]+		903.19	ESI pos	4.214	9306		6391		9297		32347		8776		2100		1424		1152		1121		886		2114		364		131	na	na	na	4204	4770	4409	5612
4.34_605.55		[M+H]+		605.551	ESI pos	4.345	44324		49540		88520		242431		76230		31400		9853		9733		8000		5145		12943		3106		482	664	455	584	26349	31761	24006	30972
3.94_874.31		[M+H]+		874.312	ESI pos	3.938	13871		8478		8443		11355		11038		12520		8465		3720		4966		3565		2809		2116		na	na	na	na	7753	10190	7869	8416
2.83_945.69		[M-H]-		945.691	ESI neg	2.825	1563		2526		3093		8508		1550		1479		1065		2861		1498		1861		1273		1827		na	na	na	na	1708	1416	1717	1320
0.22_273.08		[M-H]-		273.078	ESI neg	0.223	1403		2164		2115		1211		1954		2066		1569		1597		1966		2132		1747		1931		43	14	30	81	1476	1852	1515	1904
4.21_879.87		[M+H]+		879.867	ESI pos	4.21	4871		5390		5592		12479		8685		2054		3757		2046		1427		1140		2605		825		681	507	562	620	3794	2822	3017	3398
2.49_926.74		[M+H]+		926.743	ESI pos	2.487	5212		6043		9879		15537		6274		8106		7879		6718		10874		13722		7913		5126		74	212	205	119	8515	10190	7394	9061
1.38_301.00		[M-H]-		300.999	ESI neg	1.38	1900		2110		1997		1545		2242		1955		1981		3275		3039		2136		2527		2858		na	788	105	146	4193	3269	4206	4504
3.52_892.80		[M+H]+		892.797	ESI pos	3.518	69588		88202		83554		8932		94665		58422		68944		57695		86460		58214		114524		37205		764	622	771	397	80579	69889	82615	61507
2.64_601.52		[M+H]+		601.519	ESI pos	2.638	5037		5772		8544		14569		6484		5348		2510		2272		2292		2712		2648		1884		602	665	750	656	4211	4670	3981	3367
3.28_873.69		[M-H]-		873.685	ESI neg	3.278	12381		13270		19369		15726		15327		16842		15810		20160		21408		22801		23199		15892		na	na	27	15	22131	17078	16910	20373
3.58_951.72		[M+H]+		951.725	ESI pos	3.579	15510		14996		12943		23811		13090		9902		9249		7352		5028		6591		6891		3186		409	244	309	160	10999	14162	11253	13907
3.94_899.46		[M+H]+		899.461	ESI pos	3.944	24330		25014		31775		36936		30536		23380		13983		8414		10680		6783		12577		4127		na	na	na	na	20233	21998	20333	26610
4.13_397.38		[M+H]+		397.383	ESI pos	4.133	2501		4038		3324		1433		3402		4491		4952		7731		5940		6297		4598		6210		na	na	na	121	4016	4973	4117	5258
2.89_991.73		[M+H]+		991.728	ESI pos	2.886	5481		4236		3849		7042		4459		3741		5407		3316		3475		3266		2591		1684		122	166	181	106	3967	5290	4384	5169
2.61_929.68		[M+H]+		929.683	ESI pos	2.608	3122		5023		7260		7866		5243		5259		4840		4270		6238		4283		3591		2663		249	182	76	na	4599	5488	4682	6078
3.66_903.72		[M+H]+		903.718	ESI pos	3.657	3764		2169		2205		5467		2930		3594		4331		3160		3171		3112		4934		2491		na	130	na	147	4922	4220	4654	3577
4.60_844.79		[M+H]+		844.787	ESI pos	4.602	1579		3340		1437		1358		2241		3053		3060		6044		4967		6900		3021		4115		138	387	342	111	3255	2912	3567	4004
3.79_901.58		[M+H]+		901.583	ESI pos	3.792	9355		10624		8611		8344		9232		8096		3120		2816		5204		2618		6976		1905		na	na	na	102	6203	8681	7505	7617
0.22_395.20		[M+H]+		395.204	ESI pos	0.218	27925		30984		31341		20176		23242		26572		32388		34850		22112		22656		22674		16785		728	557	1055	943	21753	28335	21650	26139
3.94_245.23		[M+H]+		245.226	ESI pos	3.938	6145		7207		6848		11271		7064		5569		3502		1966		2951		2300		3305		1586		na	na	na	145	4516	5894	4546	5511
3.28_899.70		[M-H]-		899.702	ESI neg	3.279	3064		3346		5838		3854		3723		4535		4837		6404		7180		6542		7732		5254		na	na	na	na	6069	4519	4802	5593
3.94_900.28		[M+H]+		900.281	ESI pos	3.94	12487		16384		29082		38228		36335		13504		7262		6785		6980		6815		3968		3144		na	na	109	na	13592	13059	12502	9842
3.53_936.78		[M+H]+		936.784	ESI pos	3.526	6082		6222		7409		7754		6970		6391		5330		2985		5040		3178		4123		2023		150	85	230	232	6967	5803	5001	6084
3.27_963.67		[M+H]+		963.668	ESI pos	3.274	7898		6691		6677		10114		6681		5663		5987		2865		4183		5223		4021		1781		164	na	190	79	5984	7494	5915	7580
1.76_301.00		[M-H]-		301	ESI neg	1.764	1213		1044		1432		454		1122		1228		1571		2711		2054		1500		1884		2261		na	728	118	156	3134	2268	2602	2868
3.91_746.70		[M+H]+		746.703	ESI pos	3.906	2668		2820		2946		1560		2835		3601		4642		5015		4552		6493		3745		4744		122	331	387	261	3461	4611	3521	3989
0.20_815.10		[M-H]-		815.098	ESI neg	0.197	2868		3228		3175		3851		3281		2949		2989		2831		4116		3572		3513		4379		na	126	15	132	3779	3284	4000	4577
3.10_896.71		[M+H]+		896.712	ESI pos	3.105	1034		933		3644		600		1794		3002		3706		6801		4612		5667		5324		4414		107	165	100	144	2765	3412	3571	3873
3.12_940.72		[M+H]+		940.724	ESI pos	3.121	26234		33661		27107		56904		29477		22714		33075		9381		14617		11979		12464		6527		687	414	411	187	22821	28805	21535	27127
3.58_973.78		[M+H]+		973.78	ESI pos	3.582	12399		11297		10061		13812		9506		7513		6892		5420		4253		4968		5979		2411		374	139	121	158	8548	10512	8285	10840
3.60_861.68		[M+H]+		861.676	ESI pos	3.598	2092		2811		3165		1747		2411		2778		2395		3583		3546		3946		3586		3121		278	113	193	230	3743	3116	2840	2817
3.65_960.66		[M+H]+		960.664	ESI pos	3.655	3370		4734		2576		2492		2649		3554		5454		3223		4095		3858		5210		2652		na	98	142	101	6279	5498	5277	4473
3.79_901.64		[M+H]+		901.636	ESI pos	3.79	11662		7004		12141		10597		11761		10860		3818		316		4178		4348		5496		1728		na	na	na	na	6807	8643	6441	6821
4.43_603.53		[M+H]+		603.533	ESI pos	4.427	6302		7210		10534		26098		10310		5953		3149		2494		2507		2417		2910		1416		722	926	777	602	4866	5240	3746	4869
4.08_877.95		[M+H]+		877.952	ESI pos	4.076	10773		12960		14619		12167		13569		9364		2688		1669		2888		1503		2412		512		na	na	na	na	10292	9976	8894	7482
3.04_613.48		[M+H]+		613.483	ESI pos	3.036	7707		9635		10612		15429		9486		9112		7036		4807		8227		5474		6603		2797		265	80	84	102	6365	8590	7282	8513
3.50_893.52		[M+H]+		893.519	ESI pos	3.505	7696		15029		21684		50129		16845		11504		6785		714		3567		445		2668		445		na	90	188	na	9279	7489	10554	8945
4.35_631.57		[M+H]+		631.566	ESI pos	4.349	8961		10264		15864		48458		17556		8249		3141		2087		2016		1677		2493		1303		395	183	283	362	5751	6996	5236	6895
4.22_904.31		[M+H]+		904.31	ESI pos	4.219	4701		6383		7414		16370		7777		3101		1582		1178		1472		630		1740		565		na	na	na	na	3447	3375	3433	4440
3.20_994.91		[M+H]+		994.911	ESI pos	3.2	5812		6907		7324		7241		7183		5508		3557		3015		4683		5183		6238		1743		695	680	561	831	6722	6458	6718	4919
3.54_603.53		[M+H]+		603.534	ESI pos	3.538	5954		7891		10375		16208		7976		6526		4378		2300		4038		3299		4840		1462		251	370	151	162	5765	7135	5180	6586
3.95_929.83		[M+H]+		929.834	ESI pos	3.953	3471		3582		2819		1289		3193		4323		3530		3600		3803		3684		4232		3422		518	224	684	273	3526	4481	3403	3409
0.21_497.18		[M+H]+		497.179	ESI pos	0.211	6952		8054		5827		9536		6243		6997		6807		10157		8575		6136		10372		7525		na	na	na	na	3704	4251	3679	4915
3.79_899.42		[M+H]+		899.415	ESI pos	3.794	20229		24629		19591		32260		21872		16724		7936		4064		3931		6113		13300		2160		na	na	na	na	19042	22101	16125	17166
2.55_951.74		[M+H]+		951.74	ESI pos	2.549	3419		4934		5075		4686		4575		4665		4784		3966		6531		6460		6270		2048		163	111	167	158	5084	5883	5325	6928
0.20_360.14		[M+H]+		360.145	ESI pos	0.204	4484		3658		4724		3393		4402		5648		4503		5138		4278		4145		3644		3531		na	81	107	108	3578	3312	3965	2815
3.51_893.47		[M+H]+		893.474	ESI pos	3.51	7273		15839		10900		31593		26934		15587		7360		834		2950		619		2913		509		98	na	na	122	6315	7195	8860	7481
1.71_746.50		[M-H]-		746.497	ESI neg	1.707	558		784		736		522		650		1101		860		1580		2174		2264		2863		1942		13	na	18	na	1490	1210	1560	1182
3.94_874.34		[M+H]+		874.34	ESI pos	3.945	10233		7605		13414		16775		15003		10912		6397		3810		6413		4455		5603		1984		na	na	na	na	8990	8850	11270	11531
3.66_736.69		[M-H]-		736.685	ESI neg	3.656	362		274		421		169		710		560		1124		1456		1665		3761		1844		3235		na	17	na	na	878	668	907	740
2.33_979.62		[M-H]-		979.617	ESI neg	2.328	485		947		1143		1179		836		1269		655		1748		1146		1339		1417		1131		na	na	14	na	1632	1412	1677	1221
0.18_965.09		[M-H]-		965.094	ESI neg	0.183	928		1272		1038		1799		1290		925		916		880		1695		1348		1698		1768		na	150	51	190	1772	1426	1936	1985
3.84_271.24		[M+H]+		271.243	ESI pos	3.838	3187		3937		3275		2160		3820		5151		5084		9087		5783		6219		3674		6151		na	na	na	na	4527	5120	3631	4837
2.85_943.68		[M-H]-		943.684	ESI neg	2.851	3502		5394		6673		18299		3024		2667		2100		4840		2540		1899		1935		2453		na	na	na	na	3098	2623	3232	2368
3.09_714.63		[M-H]-		714.627	ESI neg	3.093	417		812		637		243		836		1196		729		1657		2245		2694		2991		3282		na	na	na	na	1145	875	1166	933
3.73_953.74		[M+H]+		953.741	ESI pos	3.734	8198		7620		6370		7995		6449		5147		5121		4937		2893		4255		4268		2488		111	130	256	122	6118	7739	5549	6688
3.36_927.78		[M+H]+		927.777	ESI pos	3.358	16060		17996		21407		23776		18723		17865		12440		8313		14463		12760		13264		5680		187	291	167	98	14157	17252	12433	16260
3.36_953.79		[M+H]+		953.793	ESI pos	3.36	21708		22410		27422		35959		25496		20704		12755		12587		15809		14709		18941		5775		111	174	155	390	18169	21554	16033	21798
2.51_874.66		[M-H]-		874.663	ESI neg	2.508	1220		1599		1990		2295		1678		1802		1417		3022		1985		2587		2835		2214		na	na	na	na	2546	2022	1837	2311
4.43_903.82		[M+H]+		903.821	ESI pos	4.434	4985		6188		7555		18752		6705		3914		3069		2244		2502		2221		2182		1752		845	1148	1540	1061	3898	3556	3695	4829
3.77_983.87		[M+H]+		983.873	ESI pos	3.772	3662		3327		3219		2607		3443		3299		4010		4812		4098		4644		4730		3932		545	461	637	531	3995	3007	4178	4113
3.00_880.69		[M+H]+		880.687	ESI pos	2.995	2668		3093		3686		2218		2482		4020		3479		4109		3971		4265		3826		4331		110	109	80	195	3510	3610	3306	4519
3.80_900.73		[M+H]+		900.733	ESI pos	3.796	8969		7545		8762		13787		11697		9631		3756		1603		8413		5424		5967		1147		298	108	284	na	7087	9261	9495	10007
1.18_301.00		[M-H]-		300.999	ESI neg	1.176	3172		3397		3330		2690		3820		3333		3285		6029		5424		3667		4482		5346		29	1099	195	248	7313	5895	7654	8420
3.65_901.78		[M+H]+		901.779	ESI pos	3.655	5502		4964		23591		9238		10158		7695		4843		5613		5451		5872		6219		2795		346	359	291	93	8495	6991	6285	8423
3.43_971.77		[M+H]+		971.766	ESI pos	3.426	22186		23863		18353		27556		17751		16145		16264		10221		10686		14363		11675		5989		434	na	436	252	17829	22310	16580	21735
4.08_901.36		[M+H]+		901.355	ESI pos	4.078	14853		20879		21264		58232		31469		8874		4798		2919		5053		3991		6030		2011		na	na	na	na	13510	10772	12447	9746
1.59_301.00		[M-H]-		301.004	ESI neg	1.586	1681		1698		1818		1296		1998		1765		1659		2828		2460		1705		2136		2577		14	778	137	160	3550	2571	3509	3504
3.42_1028.85		[M+H]+		1028.85	ESI pos	3.425	11152		11732		8835		16630		8617		8107		6853		4561		4384		6062		5336		2758		420	280	214	125	8047	10725	8151	9978
2.84_798.60		[M-H]-		798.604	ESI neg	2.843	474		774		649		1754		815		678		550		820		929		953		977		741		79	126	180	117	1262	1083	1285	933
3.65_895.41		[M+H]+		895.405	ESI pos	3.652	29553		39070		54572		127521		37713		45570		17213		2968		17702		7705		10790		3578		na	na	na	na	26522	23617	24911	32459
0.32_295.23		[M-H]-		295.229	ESI neg	0.316	1088		1405		5303		5944		2468		3854		2091		4550		4415		5347		5332		2415		157	206	151	171	1608	2146	1584	1852
2.98_967.77		[M+H]+		967.771	ESI pos	2.976	2225		3838		5526		18736		3000		3307		1873		3862		2742		2603		1860		3239		230	na	na	146	2729	2651	2120	2060
3.04_611.47		[M+H]+		611.466	ESI pos	3.035	6880		8658		8911		13180		8776		7592		6283		3155		6506		4805		6572		1817		193	130	143	90	5709	7906	6087	6833
3.87_950.80		[M+H]+		950.802	ESI pos	3.872	13839		12368		12156		20295		11739		8695		7183		7285		4677		5181		6455		3174		587	613	734	657	9685	12970	9949	12237
4.60_1229.17		[M+H]+		1229.16	ESI pos	4.598	3021		2957		3856		2317		5083		5397		5189		6079		7226		9945		6295		6331		469	471	464	398	4317	5286	4101	5530
1.48_301.00		[M-H]-		300.999	ESI neg	1.48	1679		1680		1683		1355		1859		1699		1659		2791		2382		1796		2164		2657		14	719	109	139	3493	2663	3458	3825
2.72_900.73		[M+H]+		900.729	ESI pos	2.718	2529		3543		4269		3480		2963		3551		3398		3298		3969		4178		4156		1768		147	183	156	136	3493	3982	3302	4562
0.43_304.30		[M+H]+		304.3	ESI pos	0.427	5070		1963		4959		3054		2666		1795		3190		3333		2280		3936		50246		3965		4483	2810	3404	2431	5357	4281	5351	4029
2.18_801.55		[M+H]+		801.549	ESI pos	2.181	1539		2056		2832		3052		1959		2757		1877		3992		6028		5881		4054		4870		159	177	60	107	3033	4220	3284	3769
4.07_875.46		[M+H]+		875.455	ESI pos	4.07	6781		7880		15770		16716		12102		7265		3511		2103		2488		1197		2759		659		na	na	na	148	6332	8652	6494	7340
2.88_990.72		[M+H]+		990.725	ESI pos	2.881	8318		5386		5435		11104		6246		5925		6974		4588		3696		5343		4700		2230		450	na	311	199	5945	8127	6349	7633
2.51_961.69		[M-H]-		961.691	ESI neg	2.508	842		1322		1293		790		679		1408		741		1050		979		1852		1730		739		na	na	na	na	1167	962	819	1058
2.08_699.50		[M-H]-		699.495	ESI neg	2.082	909		1214		2352		1022		1346		1684		1153		2800		1846		1441		1815		1645		na	na	153	42	1289	1810	1430	1623
3.80_898.55		[M+H]+		898.545	ESI pos	3.797	67439		91522		127244		131528		112715		90477		32249		15379		41278		24167		40717		12078		na	na	na	100	64957	79234	65595	87597
3.81_871.43		[M+H]+		871.432	ESI pos	3.809	4514		4458		6913		7044		4649		2850		3302		679		3263		826		2477		435		113	na	na	na	3970	4658	5313	3907
2.83_860.64		[M-H]-		860.639	ESI neg	2.834	1283		1799		1916		2147		1642		2214		2286		4009		2580		2994		3576		2468		na	na	na	na	3059	2312	3009	2379
0.21_205.04		[M-H]-		205.039	ESI neg	0.214	1804		1533		1363		1076		1734		2178		2803		1518		1762		1129		1563		1490		57	33	143	25	1460	1207	1526	1114
0.29_343.30		[M+H]+		343.296	ESI pos	0.291	5727		2683		2473		2747		4441		3265		2149		2803		2148		7512		55488		2405		3868	5967	5257	5039	4648	3958	3916	5323
2.26_552.43		[M+H]+		552.434	ESI pos	2.256	3067		2695		2749		1221		3123		3510		2657		3319		3282		3231		2891		2795		212	98	125	276	4156	3276	2930	3463
2.09_792.53		[M-H]-		792.534	ESI neg	2.094	1004		1556		1889		2934		1690		1227		699		314		1040		583		822		435		na	na	na	na	1633	1570	1210	1268
2.70_941.67		[M-H]-		941.668	ESI neg	2.699	1081		2504		3026		8155		1588		1273		948		1637		1233		619		681		903		na	na	na	17	1261	957	988	925
0.32_293.21		[M-H]-		293.214	ESI neg	0.321	6671		7195		13060		8795		10018		14183		10444		17043		11449		19098		19421		11922		45	36	na	154	9138	9621	7880	6840
3.94_879.79		[M+H]+		879.792	ESI pos	3.938	4979		4678		5245		4189		5246		5103		5067		4096		3098		4321		4311		3114		129	237	354	207	3761	4595	5437	4490
3.28_1026.83		[M+H]+		1026.83	ESI pos	3.278	6353		6965		6307		10692		5253		4792		5051		2646		3424		3673		3401		1562		298	312	87	na	4957	6422	4765	6166
2.44_885.55		[M+H]+		885.552	ESI pos	2.44	3381		4039		3966		6443		3059		4602		3663		3179		3583		3629		4529		2345		203	225	234	176	3047	4380	3894	4155
2.85_892.67		[M-H]-		892.668	ESI neg	2.854	4122		5506		5487		4179		3827		6032		6260		10723		8711		9267		10012		8184		53	39	na	44	9588	8119	9368	6818
2.02_517.49		[M+H]+		517.486	ESI pos	2.017	3675		3805		3041		2224		3313		3797		3346		4142		3273		3945		3131		3245		320	374	323	231	3954	2765	3185	3550
3.94_873.11		[M+H]+		873.11	ESI pos	3.941	15599		13392		14418		39281		15833		13240		9432		5585		7627		5902		8039		4072		na	na	na	na	11895	10077	13299	14427
3.51_893.34		[M+H]+		893.336	ESI pos	3.509	9522		8880		10253		43364		28807		7472		7053		868		2951		965		1794		366		na	na	na	na	7126	4885	6224	6098
2.48_704.56		[M-H]-		704.564	ESI neg	2.476	546		644		486		227		705		641		644		1143		912		1877		2829		2363		na	na	15	na	1575	1157	1155	1348
4.77_900.80		[M+H]+		900.8	ESI pos	4.772	5525		4186		4723		12305		4914		4342		2454		2219		2303		1968		2099		1693		854	1440	2336	944	2494	3577	3427	3385
3.09_948.73		[M+H]+		948.728	ESI pos	3.086	5297		8340		8234		7968		4828		7130		4304		6439		9057		12114		9007		4660		152	154	127	110	6232	8091	5722	6606
4.24_902.88		[M+H]+		902.877	ESI pos	4.24	64056		79501		58111		64591		78329		64937		73711		61757		64279		38093		87888		26469		531	548	540	505	82635	67593	72312	56806
2.64_491.37		[M+H]+		491.372	ESI pos	2.639	5146		4714		4747		8540		4341		4127		2202		2630		2176		3212		2232		2483		493	422	578	610	3782	5102	4244	5271
2.62_666.64		[M+H]+		666.64	ESI pos	2.621	4471		3433		3277		4605		5427		3349		3132		3612		3385		4045		36777		3580		3048	3619	2950	3987	5027	6673	4807	5975
3.09_970.80		[M+H]+		970.797	ESI pos	3.089	5055		7461		7488		24110		4455		5068		2114		7075		2924		4033		3170		3966		254	344	144	105	3280	4525	4178	4744
1.52_633.44		[M-H]-		633.439	ESI neg	1.516	1012		1260		1298		1203		1285		1193		1102		1396		1543		1358		1277		1469		18	na	na	na	1749	1220	1634	1431
4.21_265.25		[M+H]+		265.252	ESI pos	4.208	5783		5777		8115		15511		8618		3286		1729		1745		1334		840		1746		550		109	337	na	229	3198	4377	3775	3199
3.79_905.74		[M+H]+		905.741	ESI pos	3.793	5542		6607		7508		7446		6925		5900		4408		4577		3871		5378		4914		3764		106	139	na	242	4550	6293	4652	5516
4.09_903.70		[M+H]+		903.705	ESI pos	4.089	9405		11902		14225		27495		14629		8091		2636		1307		2236		1399		3552		632		129	117	na	137	9280	7889	6364	7446
3.79_938.86		[M+H]+		938.864	ESI pos	3.794	3781		2951		4628		4044		4672		5434		6771		4834		4539		4450		4601		2819		593	520	615	794	4388	4133	5841	4923
3.58_946.77		[M+H]+		946.771	ESI pos	3.58	108651		105584		85858		188918		85945		64275		55937		42303		30665		37332		37270		16875		1168	988	1426	1013	74436	95745	70455	94210
4.07_875.50		[M+H]+		875.504	ESI pos	4.073	8014		5760		11093		10559		8453		8015		4040		1924		3491		946		2951		991		na	na	na	na	6695	7455	8344	5742
2.39_836.61		[M-H]-		836.607	ESI neg	2.391	1075		1171		1313		1427		1313		1553		1522		3187		2415		2335		2954		2429		na	na	na	na	2197	1908	1548	1662
0.28_309.13		[M+H]+		309.131	ESI pos	0.278	80008		44783		29485		54568		49416		40317		79207		121831		51883		118211		81062		81747		8668	9682	7950	10537	70936	83698	60618	86119
3.81_573.54		[M+H]+		573.538	ESI pos	3.811	4757		4853		7765		10255		6467		5075		3239		1168		2424		1083		2342		727		129	na	97	na	4239	4164	2980	4222
3.42_934.80		[M+H]+		934.797	ESI pos	3.423	6341		9936		12260		40018		8394		4906		3139		8018		3294		3356		3764		3962		473	90	195	408	4473	4566	3758	5520
3.94_900.40		[M+H]+		900.404	ESI pos	3.939	26945		21133		40035		31584		31939		17176		9977		11785		13189		6471		15899		2515		na	na	na	na	16328	14856	14051	19872
4.43_605.55		[M+H]+		605.551	ESI pos	4.429	8140		9200		14641		33152		11174		7750		3723		3796		2855		2505		4674		2133		452	215	798	582	5545	7242	5036	6069
0.22_393.19		[M+H]+		393.189	ESI pos	0.22	3051		3620		4604		2959		3511		3781		2978		4611		4016		3690		4666		2986		396	458	653	716	3715	4530	3084	4064
2.01_588.47		[M-H]-		588.471	ESI neg	2.013	944		959		1432		1414		1914		2198		2227		2034		3699		4547		4584		3606		na	na	na	na	1986	1433	1780	1468
3.02_793.67		[M+H]+		793.673	ESI pos	3.025	4121		3755		3376		6590		3458		2758		2472		4566		2113		2611		2544		2069		620	609	732	471	3415	4473	3183	4122
3.28_849.64		[M-H]-		849.643	ESI neg	3.28	8144		8085		10932		7940		9171		10932		11566		15373		17092		16132		17385		14470		94	85	86	96	14849	10200	11748	12056
4.34_577.52		[M+H]+		577.519	ESI pos	4.344	9848		10479		18038		42276		15081		7055		2971		2406		2104		1590		2961		1547		617	627	468	384	7072	7161	4973	6320
3.55_892.78		[M+H]+		892.779	ESI pos	3.553	20114		14534		24431		323399		22176		31184		24665		3110		27497		38286		27018		41292		428	204	548	132	27039	19839	19343	22097
0.22_423.00		[M-H]-		423.001	ESI neg	0.22	2055		2904		2987		2035		3063		3399		3396		3477		3658		4391		5113		4064		13	375	24	177	4725	4016	3879	3188
4.07_876.62		[M+H]+		876.618	ESI pos	4.072	9194		13078		10268		18828		17927		7905		2867		1715		1429		1115		1900		315		113	na	na	na	7650	6711	7096	9496
4.17_919.76		[M+H]+		919.764	ESI pos	4.171	2720		4666		6346		8756		6621		5616		3028		1611		2325		1339		1478		1173		113	424	263	355	4344	3078	4260	4461
4.07_903.25		[M+H]+		903.255	ESI pos	4.068	5040		2000		8021		9281		6887		5812		3017		2779		2992		1526		2450		1333		na	na	na	na	4946	3626	5301	5082
3.50_899.76		[M+H]+		899.759	ESI pos	3.499	6266		7887		6698		10572		6343		7321		3864		4495		5170		3921		4829		2901		254	452	276	104	5133	4982	6983	6021
3.99_893.70		[M+H]+		893.7	ESI pos	3.993	41620		40189		38331		31542		37160		35913		24443		14553		23694		20002		23587		10132		455	203	647	152	34209	32291	29322	42233
1.63_823.78		[M-H]-		823.777	ESI neg	1.63	8198		10399		11861		8457		14855		7813		5928		18307		6464		15287		11683		9744		na	13	na	na	12552	11933	11164	15849
2.00_301.00		[M-H]-		301.004	ESI neg	1.995	978		824		922		613		1032		764		985		1676		1386		1127		1388		1576		13	587	83	121	2110	1432	1990	1838
3.54_955.81		[M+H]+		955.809	ESI pos	3.538	10358		12019		13095		14662		11512		10732		6727		5152		8222		6653		10058		3042		164	206	208	275	7605	10188	7848	10255
3.71_944.81		[M+H]+		944.815	ESI pos	3.706	3318		4007		4069		4317		4145		3779		3347		3097		2878		2915		3891		1662		225	188	127	254	3116	3942	3307	4414
2.10_301.00		[M-H]-		300.999	ESI neg	2.099	691		641		459		247		604		573		535		1729		1393		1215		1330		1485		na	609	96	105	1487	1085	1459	1616
4.44_901.80		[M+H]+		901.803	ESI pos	4.438	6997		8395		11879		27172		8880		6682		2891		2948		3249		2454		4120		2275		862	1522	1988	1194	5209	7358	5487	5745
3.47_877.67		[M-H]-		877.671	ESI neg	3.468	2586		3356		3767		3066		3816		3919		2965		6027		5311		5353		5503		6277		17	na	15	18	4839	3661	4985	3753
3.79_900.32		[M+H]+		900.321	ESI pos	3.787	3884		3886		8477		9414		7340		4391		2444		2214		3307		2422		3723		1533		na	na	na	na	4043	6073	5234	5337
2.94_760.63		[M-H]-		760.627	ESI neg	2.945	661		896		714		559		937		703		864		1164		1464		1816		1784		2085		46	49	63	36	1497	1266	1510	1054
4.09_902.63		[M+H]+		902.625	ESI pos	4.091	26330		30093		42414		40541		42703		17657		7344		5879		5817		6988		10486		1681		na	na	na	na	20867	25895	17696	23951
3.94_899.58		[M+H]+		899.584	ESI pos	3.941	34094		35934		60392		90003		66386		43488		20318		14454		18096		15153		15845		6657		na	106	na	115	57927	38743	47312	49202
4.21_903.47		[M+H]+		903.472	ESI pos	4.214	6143		5366		9940		23080		11186		4284		1328		867		1036		522		2096		554		na	na	na	na	4844	3590	4052	5161
3.94_873.37		[M+H]+		873.368	ESI pos	3.937	12836		11903		13682		23977		10855		13472		7840		5735		7615		5044		6683		3054		na	na	na	na	8056	11763	11568	10315
3.66_896.71		[M+H]+		896.711	ESI pos	3.657	58132		62519		59420		74600		83467		54420		25787		7453		24378		24381		35922		10832		na	97	92	92	47769	41000	37801	32173
0.21_549.32		[M+H]+		549.317	ESI pos	0.215	4007		7025		4559		3817		2307		4798		7206		7848		5014		3881		5008		4203		96	69	155	107	3025	4159	3669	4464
2.46_791.58		[M+H]+		791.578	ESI pos	2.458	5269		5505		4289		7771		4660		3876		2831		2752		2481		2823		2428		1643		405	383	1984	271	3792	4811	3418	4713
3.62_883.78		[M+H]+		883.775	ESI pos	3.624	5253		4640		6009		10436		5767		4422		3657		4113		3595		4798		4318		2571		451	458	428	298	3909	5514	4160	4160
3.02_885.74		[M+H]+		885.737	ESI pos	3.023	2552		3382		5165		4926		4797		3367		3416		3404		3899		3810		2195		1951		386	378	137	195	3179	4284	3296	3035
1.76_910.57		[M-H]-		910.566	ESI neg	1.763	755		1011		1054		671		809		1230		768		1449		1283		1261		1666		1283		na	na	na	70	1137	860	1269	1000
3.54_956.82		[M+H]+		956.817	ESI pos	3.536	9264		9528		9827		14568		8602		7868		8248		4114		6453		5265		7526		2848		176	336	147	311	6137	7379	6087	8528
4.07_876.28		[M+H]+		876.277	ESI pos	4.074	3247		4479		6052		5488		6857		3462		3330		2289		2961		1698		2135		633		na	na	na	na	3607	5183	4199	3834
0.97_301.00		[M-H]-		300.999	ESI neg	0.966	4355		4497		4464		3602		5196		4365		4189		6678		6988		4757		6180		6991		49	1380	227	318	9827	7093	10413	10253
3.81_898.29		[M+H]+		898.293	ESI pos	3.81	38992		40601		27435		28745		44574		49279		16419		7117		29823		14436		41087		5008		na	na	na	na	53138	40620	56079	41471
3.27_942.74		[M+H]+		942.74	ESI pos	3.274	96375		99414		94282		200198		83372		72297		74766		32717		48802		51058		48352		17955		1470	668	1218	872	76562	97520	71445	99434
2.92_668.62		[M+H]+		668.618	ESI pos	2.919	3535		3258		4269		3243		5803		7805		6175		6573		11438		12187		10682		11290		914	844	673	1110	4323	6365	5862	5055
4.13_900.86		[M+H]+		900.858	ESI pos	4.126	65631		53227		65561		74650		77658		57430		47615		77814		63433		88896		68267		96325		555	839	770	703	56614	69289	79584	83591
0.22_411.20		[M+H]+		411.198	ESI pos	0.22	9050		10863		9544		7528		8709		10374		13599		11006		10245		10910		10018		7244		220	422	549	362	8286	10556	7306	10097
3.93_901.24		[M+H]+		901.24	ESI pos	3.929	7891		7904		6405		14129		4905		7073		3135		2653		3200		2612		4215		2152		na	na	na	na	4842	5424	5181	6982
1.93_975.58		[M-H]-		975.583	ESI neg	1.932	885		1599		1771		1678		1325		2676		1161		2511		1896		1990		2648		1705		na	na	na	na	2145	1486	1765	1566
1.63_831.76		[M-H]-		831.763	ESI neg	1.629	1316		1270		1419		541		1861		990		1040		2555		590		1585		1420		1319		na	na	na	na	1875	1363	1513	1953
0.17_942.08		[M-H]-		942.079	ESI neg	0.165	773		1178		1227		1506		1230		1100		1051		1233		1755		1654		1569		1859		na	na	na	na	705	749	1022	841
3.11_872.72		[M+H]+		872.72	ESI pos	3.109	3191		4169		4264		4019		3248		3759		3522		4658		4711		6552		4525		4723		386	307	121	167	3634	4563	4061	5377
3.66_898.46		[M+H]+		898.457	ESI pos	3.66	3435		4960		6426		9946		6893		3288		3278		809		2547		1331		2205		697		na	na	na	na	4058	3327	2904	4213
3.42_944.76		[M+H]+		944.756	ESI pos	3.423	196651		214342		162833		350480		158277		143672		122699		76502		87325		117015		97416		41892		1878	1313	1794	1749	143136	195439	146100	193768
4.62_1297.23		[M+H]+		1297.23	ESI pos	4.617	2974		3097		4988		3114		5347		6461		5709		6069		7262		9181		7384		7054		168	245	280	128	6464	6676	4648	5204
4.16_900.84		[M+H]+		900.838	ESI pos	4.157	23311		22813		29804		16064		22895		25070		21560		22674		20874		23323		29150		930		806	1117	1040	991	23181	29664	30093	35540
3.03_909.80		[M+H]+		909.799	ESI pos	3.034	16002		27947		23366		40241		21975		16560		16378		4574		19588		13231		14042		2227		404	318	507	455	16577	20730	13882	15932
3.74_948.79		[M+H]+		948.786	ESI pos	3.744	52835		52391		44311		91182		46019		34858		29248		22185		16370		22832		23373		9598		1080	741	819	985	37539	50297	36293	49113
3.81_871.48		[M+H]+		871.477	ESI pos	3.814	6027		5650		8027		8759		6342		7248		4864		963		4675		1150		2480		519		na	na	na	na	4034	3787	5257	5297
3.51_933.77		[M+H]+		933.766	ESI pos	3.51	49509		60835		78560		92417		82612		59435		41561		14237		30302		15154		24748		10381		300	116	209	144	37552	47635	33672	48055
3.79_902.57		[M+H]+		902.568	ESI pos	3.791	5433		7091		7557		7391		7788		8657		3262		2167		2442		3197		4151		966		na	na	na	na	4918	4634	6217	6629
3.93_874.42		[M+H]+		874.416	ESI pos	3.931	10410		16002		14654		18219		12194		17258		8662		4804		9196		4812		9395		2935		na	na	na	na	12893	9215	13530	10553
2.19_577.52		[M+H]+		577.519	ESI pos	2.187	3184		3574		5453		11010		4918		3100		2370		2577		2786		2463		3004		2638		676	404	271	704	3977	4903	3535	5191
3.36_616.50		[M+H]+		616.502	ESI pos	3.364	4713		5844		6308		8839		6156		4654		3198		2184		3513		3478		4633		1797		163	90	172	88	4757	4102	3583	5394
1.57_169.01		[M-H]-		169.014	ESI neg	1.574	1245		1345		1081		1148		1590		1158		1202		2127		1135		1139		1364		1148		16	815	326	337	2013	1464	1511	1394
3.51_894.23		[M+H]+		894.225	ESI pos	3.508	5433		8493		11207		38922		11407		7558		6060		1340		3371		1017		2509		701		na	na	na	na	5790	4404	5836	4147
4.08_902.33		[M+H]+		902.335	ESI pos	4.084	8748		16519		30455		65042		17427		11023		4278		2990		4753		2451		4627		1533		na	na	na	na	9744	6682	7594	6975
3.66_895.11		[M+H]+		895.106	ESI pos	3.664	34908		45670		33735		59491		6301		7472		22713		3064		11008		8695		12035		3706		na	na	na	na	6934	5421	7435	8464
3.53_916.85		[M+H]+		916.85	ESI pos	3.532	2466		4920		3701		6360		5480		4170		2953		1661		2862		3637		2776		1178		569	368	377	690	4145	2713	3118	3489
3.27_947.69		[M+H]+		947.693	ESI pos	3.274	12725		13818		13372		22547		11914		10446		11756		4602		7362		6711		7230		3123		227	153	261	208	10292	14555	10482	13849
3.65_900.78		[M+H]+		900.778	ESI pos	3.649	26623		24306		70259		27138		29716		26389		13816		9495		17009		16829		18234		8958		272	379	216	360	24161	25328	18548	17520
1.80_766.53		[M-H]-		766.525	ESI neg	1.798	1461		2622		1969		1684		1416		2183		1789		3284		3941		4063		4517		3691		na	na	na	na	2989	2297	3097	2136
3.94_926.86		[M+H]+		926.865	ESI pos	3.943	5179		4344		4869		4145		4097		3634		4210		3322		4674		2980		2991		2593		362	754	447	328	3406	5381	4357	4793
4.43_633.58		[M+H]+		633.581	ESI pos	4.431	6380		6345		10886		27032		9993		4757		2193		2054		1994		1853		2916		1762		393	750	645	330	4524	5199	3329	4003
3.94_901.61		[M+H]+		901.607	ESI pos	3.941	16067		18836		25574		24427		24675		16698		3591		2840		4246		3732		6147		1337		107	na	160	na	14773	11379	9777	14303
3.79_900.27		[M+H]+		900.267	ESI pos	3.791	6374		6175		5768		9072		6589		5525		4447		2187		3039		2894		4846		1424		na	na	na	na	4291	6750	5069	5646
3.51_958.65		[M+H]+		958.653	ESI pos	3.51	5201		5053		5056		6553		5348		5176		3743		1025		3552		1698		2428		1294		na	142	na	na	5444	5842	4084	4048
3.51_893.19		[M+H]+		893.191	ESI pos	3.509	5130		7176		6995		37094		38164		6517		5595		1014		2236		1050		2907		620		na	na	na	na	6789	7041	4919	4996
2.96_938.71		[M+H]+		938.708	ESI pos	2.961	6249		12648		8143		10866		10234		8335		10947		3630		4390		2656		2089		1761		158	99	80	171	5518	7999	5423	7001
3.19_912.92		[M+H]+		912.916	ESI pos	3.195	7604		9923		9982		15290		9067		9177		3215		657		6193		5387		7269		807		83	na	104	84	6121	9648	7823	9116
3.03_992.74		[M+H]+		992.74	ESI pos	3.034	12956		8924		6729		12620		8423		7661		10105		8091		5491		9540		6431		3612		425	276	750	136	9406	11944	8581	12942
3.20_915.76		[M+H]+		915.765	ESI pos	3.196	14094		18464		19709		26095		15786		13653		6522		7598		11431		12568		12699		4348		401	297	419	182	11358	17476	13601	16796
2.84_734.61		[M-H]-		734.61	ESI neg	2.838	493		455		320		161		463		265		586		738		451		883		1029		1118		20	19	21	47	1207	834	1138	845
3.66_897.45		[M+H]+		897.45	ESI pos	3.662	14386		14156		18387		30204		20290		15874		8818		1340		5661		2144		4328		1363		na	na	na	na	10480	12586	10591	15583
3.81_872.81		[M+H]+		872.813	ESI pos	3.806	21141		5415		58589		63442		30033		19927		31071		17708		25271		15685		28968		10468		484	184	369	592	15420	22031	24989	23027
4.46_429.37		[M+H]+		429.373	ESI pos	4.462	4835		7978		3618		17925		2497		2011		1885		2841		2354		2938		2431		2929		na	na	160	198	2637	2625	1973	3227
3.13_877.79		[M+H]+		877.788	ESI pos	3.135	4849		6773		8846		12486		5934		6054		3253		4438		7373		10733		3651		2585		427	274	521	651	4231	6359	4335	5224
3.80_897.72		[M+H]+		897.716	ESI pos	3.796	13840		81834		60295		52846		31478		60028		84416		69756		71261		68867		79060		50911		142	181	296	173	66866	71765	98470	67665
4.22_904.61		[M+H]+		904.611	ESI pos	4.216	4345		10641		12230		31657		13440		4911		837		698		1097		358		1425		365		na	na	na	na	4314	2650	3682	4004
4.21_878.87		[M+H]+		878.869	ESI pos	4.208	16998		29941		37081		55961		37883		16928		6621		3931		5561		1298		3819		2923		1010	795	654	943	13756	22607	19750	18651
3.66_896.63		[M+H]+		896.627	ESI pos	3.658	46806		77704		87624		81974		40507		64805		30194		7246		26113		16917		21253		3337		na	na	118	na	48468	61075	45334	38271
3.94_901.21		[M+H]+		901.21	ESI pos	3.941	7867		8819		8852		10821		7819		7393		3213		3768		3792		3438		4641		1695		na	na	na	na	8624	8675	5444	7951
3.66_896.38		[M+H]+		896.381	ESI pos	3.656	29677		52026		54180		66951		47990		31377		15309		3552		11500		2476		10092		2301		na	na	na	na	26252	33627	35049	22854
3.93_874.71		[M+H]+		874.71	ESI pos	3.933	45244		35397		38354		51324		40454		40683		25013		10428		14138		14811		20930		2911		110	102	na	122	29669	22763	25520	18277
3.93_874.57		[M+H]+		874.571	ESI pos	3.932	18464		21705		17305		17560		29136		26051		12326		4960		15656		5814		16943		2802		126	na	120	na	25032	20674	15523	18639
1.33_169.01		[M-H]-		169.015	ESI neg	1.329	1247		812		1280		1215		1332		1083		1178		1583		1161		1120		1130		769		25	641	324	289	1574	1920	1229	1926
3.80_898.70		[M+H]+		898.7	ESI pos	3.796	62296		50914		39429		44908		55832		25287		27008		19442		27734		31082		58856		3471		na	na	228	na	43571	57800	35657	49299
3.52_894.91		[M+H]+		894.906	ESI pos	3.515	12005		13160		4671		81694		6669		5052		10238		3028		23917		1459		16024		506		355	273	434	283	4201	4742	5473	3356
0.21_136.06		[M+H]+		136.062	ESI pos	0.211	2415		2046		4303		2800		3592		3421		2804		2852		3810		3073		3550		3055		621	521	540	513	4521	3565	2746	3912
2.62_925.73		[M+H]+		925.732	ESI pos	2.62	4821		7084		11027		13684		8046		6925		7424		5395		8784		6982		6364		4356		279	135	154	83	6845	7409	5993	9503
3.94_900.95		[M+H]+		900.952	ESI pos	3.935	12366		12800		87453		121690		110022		9983		13270		10248		12815		15235		9476		23016		600	665	135	264	15237	12403	9790	10580
3.79_899.59		[M+H]+		899.587	ESI pos	3.795	31419		34816		32547		56077		48163		39402		17503		7658		15510		16764		13259		4940		na	na	na	115	31294	31208	19642	26577
3.66_898.17		[M+H]+		898.169	ESI pos	3.656	3322		5350		6280		7734		4151		4552		2494		1099		1842		1610		2797		525		na	na	na	na	3966	3968	2961	2643
3.93_900.46		[M+H]+		900.465	ESI pos	3.933	26185		28268		31556		42234		37657		19643		11923		7778		13413		6630		14163		3434		na	na	na	106	22115	16293	21655	27105
4.09_903.55		[M+H]+		903.547	ESI pos	4.095	7658		8356		18468		15411		8229		8968		2321		943		3631		1672		2558		881		na	na	na	na	10094	8419	6719	6691
3.43_985.78		[M+H]+		985.78	ESI pos	3.426	6544		6822		5138		10191		5910		4659		4246		2881		3074		3633		3437		1648		98	140	140	128	5067	6874	4327	6245
3.81_897.34		[M+H]+		897.336	ESI pos	3.806	85234		86739		45105		64507		51986		79488		22284		11043		28766		25660		44582		5894		na	na	na	na	67389	51314	42421	63574
3.65_895.20		[M+H]+		895.201	ESI pos	3.65	40771		74643		37491		38854		37769		81418		17304		3023		10171		5408		10709		2634		na	na	na	na	63140	71144	42342	60513
3.79_900.57		[M+H]+		900.57	ESI pos	3.793	6176		7035		7356		8889		8495		7647		2830		2806		3265		2360		5052		1239		136	na	na	na	5638	4353	6166	7244
4.07_875.20		[M+H]+		875.202	ESI pos	4.074	7809		7331		8332		10021		9513		6642		3965		2865		2079		2575		4122		1054		na	na	na	na	7826	4826	5843	5783
3.81_923.84		[M+H]+		923.84	ESI pos	3.809	8939		9225		5494		9091		10124		8655		8431		5677		9443		6450		6009		2227		811	1040	923	802	9233	6064	8347	6226
3.78_902.51		[M+H]+		902.507	ESI pos	3.78	8082		7458		8372		9358		8973		4407		3349		1354		3444		2349		3196		701		na	na	na	122	4774	3883	4733	6374
3.80_900.64		[M+H]+		900.644	ESI pos	3.797	8283		11168		7824		7196		13050		6588		3694		2675		3144		3080		4251		1461		na	na	na	na	6288	9495	6143	7718
3.94_875.26		[M+H]+		875.257	ESI pos	3.942	5375		6623		7272		6180		4814		4636		3137		2249		4490		2052		2544		1917		na	na	na	na	5233	3611	3978	5634
3.51_894.69		[M+H]+		894.687	ESI pos	3.51	9282		33726		22001		58865		43147		30683		12920		207		8829		503		274		705		241	na	109	na	15054	13390	13885	20630
3.94_901.58		[M+H]+		901.577	ESI pos	3.945	15024		11996		17501		25434		16416		12043		3797		2649		2941		3522		7139		1011		129	na	na	98	13818	9453	9501	13708
4.46_445.37		[M+H]+		445.367	ESI pos	4.462	2634		3044		3241		2713		1616		2538		2302		8869		4066		4981		3176		7094		na	na	204	282	2217	2897	1807	2832
3.35_886.81		[M+H]+		886.812	ESI pos	3.354	24806		25240		33636		39667		24437		23125		9357		6758		15318		3668		16372		2753		379	459	414	416	22744	13659	22529	20220
4.21_904.66		[M+H]+		904.662	ESI pos	4.213	7653		11390		14147		22015		20515		7622		1035		723		876		691		1628		484		na	112	na	na	5636	3687	5740	4176
3.03_792.67		[M+H]+		792.671	ESI pos	3.031	7531		6711		5255		9112		5886		4483		4258		5004		3272		4331		3893		3148		766	841	1104	809	5354	8052	5303	7393
3.79_897.36		[M+H]+		897.364	ESI pos	3.789	82041		139059		52395		19157		77012		72689		28273		10255		28003		20305		33497		7142		104	na	na	na	65952	50492	38508	56286
2.64_829.67		[M+H]+		829.665	ESI pos	2.636	6018		5242		4018		5437		4684		4179		3089		3039		2373		3409		2438		2221		529	653	663	293	4291	6051	3705	5370
3.68_935.83		[M+H]+		935.833	ESI pos	3.684	2329		1735		44592		1099		975		1325		2895		2461		1475		1665		2241		534		322	356	502	440	1823	2029	2318	2964
3.41_986.80		[M+H]+		986.799	ESI pos	3.411	5338		5481		4484		7293		4256		3845		4399		2605		2684		3198		3018		1697		240	na	194	120	5315	5088	4165	7003
2.81_958.73		[M+H]+		958.734	ESI pos	2.806	3364		2810		2476		4467		2124		3000		3458		3061		3050		5638		3636		1806		82	97	na	82	2646	3783	2738	4087
3.94_900.73		[M+H]+		900.731	ESI pos	3.943	60934		49950		70476		69975		41925		37018		27481		30362		33440		19388		45582		4973		274	145	154	117	30883	40599	32972	49641
4.07_876.53		[M+H]+		876.531	ESI pos	4.073	8297		4491		11065		21414		11192		4529		1513		941		1000		644		2150		651		na	na	na	na	6027	6905	4355	7499
3.79_908.46		[M+H]+		908.464	ESI pos	3.794	4806		5179		6046		8619		7802		3450		1499		1364		2664		1968		2495		529		149	100	na	na	3829	4222	2428	3452
4.60_843.77		[M+H]+		843.774	ESI pos	4.599	3117		4123		2392		1151		2220		5057		2068		10030		6804		10836		3942		8142		437	325	466	435	4930	7945	5674	7525
4.09_902.59		[M+H]+		902.594	ESI pos	4.087	24170		20841		34779		54545		37297		22997		11610		5887		2344		5073		7936		1628		na	na	na	141	23346	26441	15850	18875
4.22_903.43		[M+H]+		903.432	ESI pos	4.216	5769		5055		9039		20896		11682		5500		1262		963		1065		584		1753		486		na	na	na	na	4750	4810	2954	5101
4.08_901.21		[M+H]+		901.212	ESI pos	4.079	8646		41899		73369		33020		37835		14540		7077		4598		8126		4844		9118		2798		na	na	na	na	10805	14546	8853	10031
3.96_899.34		[M+H]+		899.337	ESI pos	3.955	29187		41741		44454		55916		39279		34033		8972		6226		8119		6672		8856		3891		na	na	na	na	17893	24811	20792	29928
3.94_873.17		[M+H]+		873.168	ESI pos	3.938	10097		10308		9200		41269		9715		12126		6476		1526		6088		1798		6505		1639		na	na	na	na	5722	7940	9074	9958
3.19_994.76		[M+H]+		994.757	ESI pos	3.191	6524		5016		3352		6090		5394		3157		4516		4420		2305		3667		3116		1548		285	93	182	298	4436	6062	4369	6831
3.65_897.60		[M+H]+		897.601	ESI pos	3.653	22232		14971		15552		58611		26399		19401		6825		1293		4256		3135		6118		1283		122	na	106	91	15221	16980	21406	12529
3.79_897.51		[M+H]+		897.505	ESI pos	3.788	46396		65441		44816		95472		44178		77458		21175		16286		27565		21636		25299		11039		na	na	na	na	53678	45779	34514	33994
3.95_874.61		[M+H]+		874.612	ESI pos	3.95	16648		15363		16707		29217		26085		27643		10348		5226		8913		7667		14824		3322		103	na	na	96	22295	17125	16355	12870
3.30_896.77		[M+H]+		896.767	ESI pos	3.302	3995		5227		4802		9324		3646		4477		2719		4750		3605		5066		3979		2966		295	674	461	616	2780	4884	4404	3853
4.70_900.80		[M+H]+		900.798	ESI pos	4.699	5259		5735		7346		15070		6448		5459		2829		2458		2117		2529		3101		1768		988	1759	2161	1133	2931	3833	3180	4816
2.19_690.51		[M+H]+		690.507	ESI pos	2.195	2177		2914		4890		3109		2494		5724		3202		5738		7576		6448		5114		6450		132	269	396	235	2305	3399	3733	4121
3.66_895.53		[M+H]+		895.529	ESI pos	3.657	65399		39630		40856		128027		91547		58737		30960		6200		16062		12312		17264		5548		na	na	na	na	42796	36047	58468	58471
4.08_928.88		[M+H]+		928.879	ESI pos	4.082	7479		7361		10629		10360		12636		8776		5360		3040		2302		2245		6268		3083		795	416	947	540	7473	8913	6655	5013
3.08_995.85		[M+H]+		995.845	ESI pos	3.084	2993		3247		9154		10427		4863		3365		2929		2058		2787		2594		7194		1523		194	360	393	183	5383	3421	3476	3731
3.63_896.92		[M+H]+		896.919	ESI pos	3.632	2059		1276		34571		37122		52628		92129		38		7708		1265		6414		40		20025		522	312	272	122	87656	75337	51044	89095
3.65_897.50		[M+H]+		897.502	ESI pos	3.655	20810		14216		15937		27433		18782		19692		10922		1662		7470		2930		7097		1388		na	na	na	na	10614	13397	10767	17078
3.94_900.60		[M+H]+		900.595	ESI pos	3.939	42841		49405		61796		66626		79278		34595		18725		14256		16025		16318		18192		2811		109	na	129	101	37351	42867	34250	23693
3.84_744.69		[M+H]+		744.686	ESI pos	3.839	1903		3052		2840		1345		2688		2929		3486		5133		3002		4139		2627		4278		157	261	519	130	2768	2751	3409	4409
2.64_793.59		[M+H]+		793.595	ESI pos	2.638	15967		14684		12054		18205		12787		9891		6823		6119		5134		7953		5925		4229		828	287	625	617	9406	14382	10175	15013
1.18_433.04		[M-H]-		433.042	ESI neg	1.179	1670		1900		1672		1513		1470		2065		2080		2606		2851		1713		2321		2990		59	382	59	107	2270	1352	1784	2308
3.79_898.57		[M+H]+		898.574	ESI pos	3.794	80857		85025		86732		82670		65120		84610		34474		17441		55629		37840		52165		12473		na	94	na	na	118579	68623	81585	98797
2.83_795.61		[M+H]+		795.61	ESI pos	2.83	5480		4306		4384		7056		3777		3031		2321		3140		1954		2878		2331		1735		320	423	319	216	3124	4042	3599	5344
4.64_858.80		[M+H]+		858.804	ESI pos	4.639	8475		12779		7117		4101		3951		8350		9708		13593		19034		18511		14977		14731		282	393	186	523	14718	16132	8851	13330
3.79_907.69		[M+H]+		907.687	ESI pos	3.794	4141		3620		7123		10833		5924		3825		972		756		3111		2594		2063		1054		97	na	na	104	3134	5161	3294	4347
3.95_899.54		[M+H]+		899.541	ESI pos	3.95	57139		56191		60482		106690		70648		33210		9205		5987		14403		10348		23408		4847		na	na	na	na	47708	46612	39538	26770
3.70_916.69		[M+H]+		916.689	ESI pos	3.7	75662		75268		59361		69851		73058		59242		42860		19963		75512		67538		41052		48138		31	1150	115	90	57503	79167	77235	46821
3.95_900.64		[M+H]+		900.636	ESI pos	3.954	40754		27598		40162		59696		56153		41944		20505		11651		14140		13649		19017		3981		na	na	na	124	22441	40386	35133	29699
0.21_427.17		[M+H]+		427.173	ESI pos	0.213	5753		9098		3928		5759		4245		5782		7565		6528		6246		4615		5420		5176		66	154	52	na	3812	3590	2856	5076
3.51_930.79		[M+H]+		930.794	ESI pos	3.511	4303		4874		5161		4227		4154		5273		3297		2311		2843		2953		3465		1941		343	241	186	235	3015	4464	2804	4452
2.66_927.67		[M+H]+		927.669	ESI pos	2.656	2857		8090		8603		19330		7216		4383		3583		3548		3161		2432		1411		2442		86	93	84	na	2632	4483	2995	3144
4.07_875.54		[M+H]+		875.54	ESI pos	4.073	11877		11519		13232		17015		13219		8590		3083		2195		3241		1150		2515		554		na	na	na	na	11477	7332	8011	6917
4.07_876.57		[M+H]+		876.572	ESI pos	4.068	12855		8640		12325		19672		10985		9688		2281		1139		1719		1425		1054		547		104	na	na	107	5273	5346	6822	8705
0.33_230.25		[M+H]+		230.249	ESI pos	0.332	8028		5654		5088		9478		6248		4124		6423		14825		10871		24834		676262		8715		8132	6551	7586	6395	11839	18608	13166	19712
2.38_638.61		[M+H]+		638.608	ESI pos	2.376	4470		3541		4640		5043		5963		3627		4696		4800		3782		4798		46293		4259		3799	5652	3826	5113	5400	8229	5178	8089
3.81_871.62		[M+H]+		871.62	ESI pos	3.811	9471		3304		10455		13046		9885		6570		6996		734		4894		944		4442		403		108	na	na	na	5558	7023	3833	6606
3.94_873.64		[M+H]+		873.638	ESI pos	3.938	13942		23413		22626		37750		37857		16172		20595		6935		15408		14477		16765		5129		125	129	na	na	23935	13895	22690	16683
4.07_903.67		[M+H]+		903.674	ESI pos	4.073	7476		15310		14813		27016		16374		8464		2383		1570		2542		1769		3145		932		na	123	na	na	10308	6739	11157	12802
3.65_895.44		[M+H]+		895.439	ESI pos	3.654	46440		36411		44030		135646		36789		23529		20567		6090		12527		8226		13326		3671		na	na	na	na	26442	36841	22550	22352
4.21_903.62		[M+H]+		903.624	ESI pos	4.212	11450		14053		19067		41088		15135		6406		1482		978		571		558		3212		267		na	na	na	na	6227	10718	6858	9214
3.79_898.62		[M+H]+		898.62	ESI pos	3.788	82557		82018		44329		49947		65749		70509		44948		24835		25846		35565		46587		13845		102	110	195	225	88983	59321	54558	89488
2.84_955.77		[M+H]+		955.768	ESI pos	2.836	2559		2652		5156		7403		3365		3440		2872		3154		3348		5206		2742		3216		96	133	118	135	2911	3694	2507	4498
3.65_896.57		[M+H]+		896.567	ESI pos	3.652	24087		40335		84951		128035		69719		68117		24459		5931		22601		9800		25407		3091		105	na	na	na	51757	63079	32961	45843
3.94_899.19		[M+H]+		899.189	ESI pos	3.942	46304		55669		48124		67994		43446		41999		6218		4850		7183		2121		11505		4714		na	na	na	na	38037	34153	19748	29240
3.65_899.87		[M+H]+		899.866	ESI pos	3.648	5072		7350		2698		5909		4673		7246		14793		9733		11679		10557		15220		6260		915	1095	963	1073	6690	10263	8720	12656
0.31_279.16		[M-H]-		279.165	ESI neg	0.314	1029		1082		805		2995		1471		621		1159		3090		2331		8841		70401		1625		1029	924	966	677	2232	3489	2579	4006
3.65_897.83		[M+H]+		897.831	ESI pos	3.653	63186		52583		25797		123454		77107		48528		33302		2382		20747		6491		28166		3755		774	767	906	600	27379	47028	28933	41979
2.90_946.72		[M+H]+		946.718	ESI pos	2.903	2800		3793		3993		4515		3951		3613		3535		3009		4974		4246		3321		2054		na	95	na	91	3660	3703	2065	4174
3.66_897.70		[M+H]+		897.7	ESI pos	3.659	24798		19608		26548		46623		35380		19642		8958		2281		6644		4885		8988		1522		105	131	94	107	20137	19703	13009	26179
3.79_907.84		[M+H]+		907.84	ESI pos	3.79	4930		3446		5747		9473		5220		5388		1333		1622		2705		2589		3303		1188		865	707	647	1116	3597	4610	2409	3011
3.93_875.51		[M+H]+		875.506	ESI pos	3.934	4812		4315		5355		6836		9592		3527		5353		1931		2899		3373		1937		1499		131	na	na	na	2722	5510	4228	4849
3.95_901.72		[M+H]+		901.722	ESI pos	3.951	11193		22626		19502		35277		10591		10849		3712		1862		4979		3505		10866		1229		na	526	541	527	9265	14914	10773	17154
3.48_915.85		[M+H]+		915.851	ESI pos	3.481	2460		7844		3804		3412		3561		5165		2267		3839		3203		1769		2749		741		863	650	736	877	3234	2960	2226	1673
3.53_914.84		[M+H]+		914.845	ESI pos	3.534	17893		15307		20900		27080		13016		12790		10203		4768		9400		7967		13727		2258		617	434	720	490	8502	6010	11994	8496
4.09_902.30		[M+H]+		902.298	ESI pos	4.09	10240		12924		16762		63743		19579		12555		6914		4604		5312		2942		7456		2253		na	na	na	na	12195	6515	9548	7471
3.78_908.39		[M+H]+		908.39	ESI pos	3.784	5366		5603		5307		8590		7276		5128		2421		1719		1439		1728		3125		689		na	na	na	na	6741	5147	3706	3945
4.08_876.47		[M+H]+		876.473	ESI pos	4.08	4832		7354		6128		14270		6831		5535		1771		1320		1365		854		1638		642		na	na	na	na	5489	5511	3022	6434
3.09_929.82		[M+H]+		929.825	ESI pos	3.09	4717		10465		10039		42047		3715		3240		2248		7299		2318		2644		2814		3300		607	609	667	677	3401	2498	1642	2494
3.79_902.63		[M+H]+		902.63	ESI pos	3.791	5047		7776		5590		8809		7421		9241		2536		1657		201		2048		2778		828		98	na	na	na	5071	8651	4682	6931
2.21_836.63		[M+H]+		836.626	ESI pos	2.212	5595		4406		3168		6598		4596		3604		3552		3705		2739		4744		2937		3081		413	307	152	443	4096	5778	3651	6845
2.87_907.77		[M+H]+		907.774	ESI pos	2.872	4775		18185		13168		9867		16291		12106		4168		1993		5019		1158		2493		1583		239	490	354	552	6254	7737	6088	3578
3.93_899.64		[M+H]+		899.636	ESI pos	3.928	32285		44567		78226		110310		62761		41504		25322		8773		19435		8044		20615		8024		na	na	120	na	37531	56665	27983	47486
3.26_930.84		[M+H]+		930.84	ESI pos	3.259	3385		5724		7512		29458		1945		2532		1813		4050		2107		1831		1578		2178		398	507	549	388	1875	2520	1936	3416
4.12_958.88		[M+H]+		958.879	ESI pos	4.117	13106		19024		14185		13399		14891		12104		21455		18858		18950		15533		19027		12647		611	830	679	590	21329	13231	20505	11772
3.93_901.48		[M+H]+		901.48	ESI pos	3.93	17580		10567		17078		21808		16634		12469		5145		2784		3211		3269		6339		1498		na	114	99	132	11398	9377	7004	14352
3.79_900.36		[M+H]+		900.357	ESI pos	3.793	5047		7249		5798		7060		4655		4771		3383		1866		3365		2863		4933		1350		na	na	106	na	4217	6258	3397	6433
0.32_353.20		[M-H]-		353.202	ESI neg	0.318	424		404		216		515		393		242		283		788		381		1094		24418		497		339	384	361	146	479	904	526	638
3.80_900.53		[M+H]+		900.525	ESI pos	3.797	6117		7128		6474		7768		9159		6268		3963		2821		3737		4084		3192		1587		na	na	na	na	5125	6532	5726	2972
0.32_309.18		[M-H]-		309.175	ESI neg	0.316	1226		1075		592		1457		1095		560		752		1977		1336		3295		63857		1254		970	972	950	787	1536	2819	1699	2739
3.80_896.71		[M+H]+		896.714	ESI pos	3.801	78979		82044		80366		85056		82091		80956		75683		38450		72966		59161		79794		na		104	351	393	151	78257	78882	82849	76444
4.00_899.94		[M+H]+		899.941	ESI pos	4.002	9262		7668		8918		na		10781		8935		8304		9154		7314		6574		7612		8714		684	660	562	504	7623	7510	8163	7925
3.35_932.76		[M+H]+		932.765	ESI pos	3.354	12466		20548		17976		4095		27022		17147		14586		na		9593		3302		4674		3346		na	303	241	91	12580	13522	12146	13379
4.08_926.97		[M+H]+		926.971	ESI pos	4.083	13414		14164		15393		9403		16081		14409		4777		815		1773		481		2693		519		519	350	205	480	12331	12946	11293	11820
4.06_900.86		[M+H]+		900.862	ESI pos	4.061	2979		2924		31510		na		35055		44770		52379		50438		43076		74440		27542		96325		872	522	633	525	39888	32665	na	na
3.65_935.82		[M+H]+		935.818	ESI pos	3.653	2329		1637		55733		na		2477		3603		2214		1109		1129		446		517		1457		250	353	99	395	na	2565	2015	1880
3.51_893.67		[M+H]+		893.674	ESI pos	3.51	48118		57812		58934		84926		73088		40724		10359		283		8082		823		518		617		140	na	107	na	37413	46844	33527	33003
4.24_903.97		[M+H]+		903.974	ESI pos	4.243	2915		9516		7087		na		5315		6493		4892		7801		8628		10457		6336		471		603	370	210	221	4012	4813	6089	4298
3.16_933.72		[M-H]-		933.72	ESI neg	3.159	1284		1314		1413		1673		1286		1273		970		1360		430		1358		1237		234		64	79	39	81	1348	1069	749	1299
3.94_899.15		[M+H]+		899.155	ESI pos	3.939	39459		38366		18826		na		30921		47962		9561		8067		9390		7469		11144		3170		na	na	na	na	54464	50308	25407	48087
4.07_876.73		[M+H]+		876.73	ESI pos	4.073	24034		19256		37093		35208		27504		15514		5712		716		568		686		336		781		110	157	143	na	17671	20644	10112	13816
2.87_906.77		[M+H]+		906.769	ESI pos	2.871	11761		5888		17539		20118		6479		15435		15034		1940		8453		4229		2386		1800		478	391	239	192	12569	14139	7819	8212
3.81_871.70		[M+H]+		871.705	ESI pos	3.811	33199		35485		43794		49351		35447		33544		26537		269		23061		594		13783		603		135	191	100	142	30654	31221	30059	31634
3.94_602.65		[M+H]+		602.647	ESI pos	3.938	9344		10346		12092		18360		9367		6842		na		138		305		424		329		524		na	na	na	na	6767	7823	7392	7842
3.81_872.71		[M+H]+		872.71	ESI pos	3.809	12715		11875		24316		23564		18247		11833		8254		941		4514		264		na		1258		245	103	112	238	11601	9220	8650	8003
4.14_900.95		[M+H]+		900.952	ESI pos	4.139	9000		na		12132		na		8500		7897		5060		7881		3492		2846		6620		6303		901	587	1418	1176	8044	7575	6688	8268
3.90_898.94		[M+H]+		898.936	ESI pos	3.905	13730		11812		13770		na		12747		12643		3086		108		335		348		1624		3200		542	888	558	464	13289	12340	10870	10555
3.65_877.76		[M+H]+		877.763	ESI pos	3.653	na		2515		111207		na		833		952		740		1339		516		2048		1215		1148		108	224	206	224	na	na	1041	na
3.93_899.01		[M+H]+		899.011	ESI pos	3.928	27029		30136		29261		na		30056		51619		46898		55		na		75		87512		na		na	na	na	na	54678	55953	32376	57866
3.83_897.00		[M+H]+		897	ESI pos	3.831	51243		52933		32950		54204		28174		29441		na		93610		na		32169		31634		na		na	na	na	na	32931	55579	49920	na
3.63_894.98		[M+H]+		894.979	ESI pos	3.635	32171		29181		105		na		126		29608		40376		na		60811		na		56399		na		na	na	na	na	31568	31951	32176	na
0.22_487.09		[M-H]-		487.093	ESI neg	0.218	431		447		409		na		723		na		1946		467		na		na		na		na		na	111	na	44	2611	2627	2901	2877
3.95_901.83		[M+H]+		901.833	ESI pos	3.954	61811		60639		37195		45027		58368		37820		na		1575		na		na		na		1885		715	648	574	296	47617	32797	34057	54532
3.80_897.07		[M+H]+		897.066	ESI pos	3.798	32909		54911		32605		na		na		30964		70442		na		46934		52885		na		na		na	na	na	na	32618	na	31624	na
3.77_897.00		[M+H]+		897	ESI pos	3.771	na		31905		na		na		na		na		na		93610		52		31147		30401		na		na	na	na	na	32765	na	na	27834
3.50_894.87		[M+H]+		894.867	ESI pos	3.501	na		na		25410		30142		40014		na		905		29		943		884		na		876		902	972	937	811	na	828	1020	na
0.22_433.12		[M-H]-		433.12	ESI neg	0.219	4214		3907		2601		1265		na		1840		3140		1678		na		na		na		na		30	30	23	80	na	2960	3289	1988
3.94_900.01		[M+H]+		900.01	ESI pos	3.938	30694		63783		28338		na		56093		113698		na		70		na		98		na		na		na	na	na	na	97526	117289	106553	118602
3.65_597.51		[M+H]+		597.509	ESI pos	3.653	14257		na		607295		na		na		6596		na		na		na		483		6188		na		129	192	302	93	15481	na	21981	23031
3.67_895.98		[M+H]+		895.978	ESI pos	3.666	28485		53970		29921		55149		28944		52914		71640		na		52722		na		50310		na		na	na	na	na	30406	33075	51408	53342
0.22_301.07		[M-H]-		301.069	ESI neg	0.223	2681		2311		734		na		3018		4117		2536		3191		4065		3453		2544		2486		30	31	39	39	na	na	na	na
4.07_901.10		[M+H]+		901.098	ESI pos	4.069	na		na		31476		56612		na		na		83		na		163		na		200		na		na	na	na	na	na	na	na	na
3.64_895.01		[M+H]+		895.012	ESI pos	3.638	32929		29288		135		na		28972		na		49649		na		29406		na		28846		na		na	na	na	na	28513	30249	29916	na
3.65_896.88		[M+H]+		896.881	ESI pos	3.649	27385		29274		na		na		26091		27070		na		na		42755		na		24431		na		852	863	771	918	25843	28948	21930	na
3.36_891.84		[M+H]+		891.843	ESI pos	3.362	na		1064		na		49043		25527		na		na		na		na		688		na		80		1145	1550	979	985	na	na	na	984
4.08_901.03		[M+H]+		901.029	ESI pos	4.083	63712		56000		31372		na		31010		29171		na		na		na		na		na		na		na	na	na	na	93700	109682	104644	107927
3.94_873.00		[M+H]+		872.996	ESI pos	3.936	105991		117272		95560		53911		94928		70401		na		na		na		na		na		na		na	na	na	na	88982	87688	82576	98413
3.67_895.02		[M+H]+		895.024	ESI pos	3.673	na		28835		30806		30701		na		29422		49649		na		na		na		na		na		na	na	na	na	na	30249	33098	29546
3.64_896.96		[M+H]+		896.963	ESI pos	3.644	na		62		41780		na		32641		na		na		119		na		na		153		50		na	na	na	147	na	101	78	na
3.65_899.75		[M+H]+		899.746	ESI pos	3.653	na		999		267825		na		na		na		516		412		na		546		na		na		157	664	293	320	na	na	na	na
4.22_904.95		[M+H]+		904.948	ESI pos	4.218	na		na		na		78758		na		na		na		na		na		1067		na		906		659	719	479	810	na	na	na	na
4.08_875.90		[M+H]+		875.903	ESI pos	4.076	na		28316		27681		na		na		545		na		na		na		na		na		875		656	649	767	669	na	28413	na	na

## Sheet: iSTDs
					Label	T1_N_L		T1_E_L		T1_S_L		T1_W_L		T2_N_L		T2_E_L		T2_S_L		T2_W_L		T3_N_L		T3_E_L		T3_S_L		T3_W_L		MtdBlank001	MtdBlank002	MtdBlank003	MtdBlank004	PoolQC001	PoolQC002	PoolQC003	PoolQC004
					Sample #	1		3		5		7		9		11		13		15		17		19		21		23		Blank	Blank	Blank	Blank	QC	QC	QC	QC
					Species	English Walnut (Juglans regia)		English Walnut (Juglans regia)		English Walnut (Juglans regia)		English Walnut (Juglans regia)		English Walnut (Juglans regia)		English Walnut (Juglans regia)		English Walnut (Juglans regia)		English Walnut (Juglans regia)		English Walnut (Juglans regia)		English Walnut (Juglans regia)		English Walnut (Juglans regia)		English Walnut (Juglans regia)						English Walnut (Juglans regia)	English Walnut (Juglans regia)	English Walnut (Juglans regia)	English Walnut (Juglans regia)
					Organ	Seed Coat/Pellicle		Seed Coat/Pellicle		Seed Coat/Pellicle		Seed Coat/Pellicle		Seed Coat/Pellicle		Seed Coat/Pellicle		Seed Coat/Pellicle		Seed Coat/Pellicle		Seed Coat/Pellicle		Seed Coat/Pellicle		Seed Coat/Pellicle		Seed Coat/Pellicle						Seed Coat/Pellicle	Seed Coat/Pellicle	Seed Coat/Pellicle	Seed Coat/Pellicle
					Treatment	Light Colored Seed Coat		Light Colored Seed Coat		Light Colored Seed Coat		Light Colored Seed Coat		Light Colored Seed Coat		Light Colored Seed Coat		Light Colored Seed Coat		Light Colored Seed Coat		Light Colored Seed Coat		Light Colored Seed Coat		Light Colored Seed Coat		Light Colored Seed Coat
					File ID	Dandekar018_MX686371_posCSH_T1-N-L-001.d		Dandekar019_MX686371_posCSH_T1-E-L-003.d		Dandekar017_MX686371_posCSH_T1-S-L-005.d		Dandekar015_MX686371_posCSH_T1-W-L-007.d		Dandekar010_MX686371_posCSH_T2-N-L-009.d		Dandekar020_MX686371_posCSH_T2-E-L-011.d		Dandekar013_MX686371_posCSH_T2-S-L-013.d		Dandekar003_MX686371_posCSH_T2-W-L-015.d		Dandekar023_MX686371_posCSH_T3-N-L-017.d		Dandekar014_MX686371_posCSH_T3-E-L-019.d		Dandekar007_MX686371_posCSH_T3-S-L-021.d		Dandekar024_MX686371_posCSH_T3-W-L-023.d		MtdBlank001_MX686371_posCSH_preDandekar001.d	MtdBlank002_MX686371_posCSH_postDandekar010.d	MtdBlank003_MX686371_posCSH_postDandekar020.d	MtdBlank004_MX686371_posCSH_postDandekar024.d	PoolQC001_MX686371_posCSH_preDandekar001.d	PoolQC002_MX686371_posCSH_postDandekar010.d	PoolQC003_MX686371_posCSH_postDandekar020.d	PoolQC004_MX686371_posCSH_postDandekar024.d
Identifier	Annotation	Species	InChI Key	m/z	RT	Peak Height		Peak Height		Peak Height		Peak Height		Peak Height		Peak Height		Peak Height		Peak Height		Peak Height		Peak Height		Peak Height		Peak Height		Peak Height	Peak Height	Peak Height	Peak Height	Peak Height	Peak Height	Peak Height	Peak Height
0.26_319.27	1_CAR 10:0-d3 iSTD	[M+]		319.267	0.257	9906		8134		8272		8229		9081		8558		7751		8042		8222		8890		8245		8111		9802	9807	10293	9898	9551	8852	8697	8763
0.32_347.30	1_CAR 12:0-d3 iSTD	[M+]		347.299	0.317	30984		26939		28717		25940		29375		28734		28141		27961		22142		26903		27694		23953		28597	29031	26953	27174	28448	28640	29039	26616
1.03_431.39	1_CAR 18:0-d3 iSTD	[M+]		431.393	1.033	42630		44544		41917		38681		43137		42918		45884		45551		37832		45253		47493		41962		41223	42641	40196	40362	43743	42493	42275	43130
4.43_1436.32_4.44_1076.01_4.43_729.65_4.43_724.70	1_CE 22:1 iSTD	[2M+Na]+_[M+Chol-head-H2O+H]+_[M+Na]+_[M+NH4]+	SQHUGNAFKZZXOT-JWTURFAQSA-N	1436.3159_1076.0149_729.6522_724.6971	4.435	229989		223756		232134		160136		217852		257419		263519		259373		205292		255694		272949		265533		280438	269454	295210	267159	255499	275576	221358	250895
4.04_725.69	1_CE 22:4-d7 iSTD	[M+NH4]+		725.691	4.037	731		542		944		223		693		598		968		1220		978		1445		1120		1106		1737	1806	1596	1742	859	1058	569	710
2.14_543.55_2.14_525.54_2.14_565.53	1_Cer 16:1 d18:1-d7/16:1 iSTD	[M+H]+_[M+H-H2O]+_[M+Na]+		543.5471_525.5374_565.5293	2.14367	167088		167597		156952		161540		185515		167890		167701		171530		153877		171035		183961		174226		169984	166742	160352	164783	167744	172355	175274	171400
2.40_571.58_2.40_553.57_2.40_593.56	1_Cer 18:1 d18:1-d7/18:1 iSTD	[M+H]+_[M+H-H2O]+_[M+Na]+		571.5787_553.5687_593.5602	2.39867	90913		99499		93405		97453		96877		97394		93599		100362		78681		97627		99144		97120		94231	88301	91776	84742	95229	90053	85750	90472
2.64_599.61_2.64_581.60_2.64_621.59	1_Cer 20:1 d18:1-d7/20:1 iSTD	[M+H]+_[M+H-H2O]+_[M+Na]+		599.61_581.5989_621.5915	2.63933	58616		60729		65835		76290		62633		59129		56613		57661		48907		56325		54629		53610		50782	48702	50802	49243	60890	61985	58257	57694
2.88_627.64_2.88_609.63_2.88_649.62	1_Cer 22:1 d18:1-d7/22:1 iSTD	[M+H]+_[M+H-H2O]+_[M+Na]+		627.6414_609.6307_649.6247	2.87833	106134		99128		101655		100832		104388		100264		101629		105756		86045		107593		102919		106640		99089	101799	100862	108129	100370	103765	102679	101934
3.11_655.67_3.11_637.66	1_Cer 24:1 d18:1-d7/24:1 iSTD	[M+H]+_[M+H-H2O]+		655.673_637.6628	3.109	132269		138650		120561		118597		130524		128640		138318		136523		115369		135708		136901		136664		133563	134096	129995	136831	132703	133221	132099	131872
3.11_677.65	1_Cer 24:1 d18:1-d7/24:1 iSTD	[M+Na]+		677.654	3.109	18293		18099		16702		11754		17196		18244		20120		19014		15723		17716		19319		19545		21981	20992	19809	21749	18858	19871	18636	17304
0.31_341.28	1_CUDA iSTD	[M+H]+	HPTJABJPZMULFH-UHFFFAOYSA-N	341.28	0.307	86857		79306		83141		78524		89353		84156		83223		75215		69911		78628		85614		73224		118678	114309	114739	108147	85428	82338	88022	81814
2.47_575.54	1_DG 17:0/14:1-d5 iSTD	[M+NH4]+		575.538	2.472	1894		1523		1366		1089		1660		1670		1449		1362		2012		1824		1410		1589		1752	1762	1699	1559	1494	1565	1804	1595
2.71_624.50_2.71_608.53_2.72_603.57	1_DG 17:0/16:1-d5 iSTD	[M+K]+_[M+Na]+_[M+NH4]+		624.5001_608.5339_603.571	2.71533	6025		6398		6554		5546		6536		6331		6330		6809		5448		6586		7313		6570		6585	6951	8154	7179	6643	6359	5837	7601
2.95_652.53_2.96_636.55_2.96_631.60	1_DG 17:0/18:1-d5 iSTD	[M+K]+_[M+Na]+_[M+NH4]+		652.5302_636.5548_631.6036	2.953	8792		8029		7088		5686		8150		8399		8102		8694		7416		7698		8555		9065		9466	9557	10218	10368	8092	9734	7828	7943
2.81_676.53_2.81_660.56_2.81_655.60	1_DG 17:0/20:3-d5 iSTD	[M+K]+_[M+Na]+_[M+NH4]+		676.5342_660.5568_655.6036	2.811	14034		13889		14411		12578		14679		15881		13255		14709		14655		16330		17471		15287		13550	13450	14797	12980	13554	13352	15352	14298
2.87_702.55_2.87_686.58_2.87_681.62	1_DG 17:0/22:4-d5 iSTD	[M+K]+_[M+Na]+_[M+NH4]+		702.5469_686.5758_681.6179	2.86767	9581		8954		9398		8949		10089		9280		9575		10245		7896		10919		9026		9907		9310	10280	9232	9852	8744	9209	9164	8294
0.54_487.36_0.54_509.34	1_LPC 15:0-d5 iSTD	[M+H]+_[M+Na]+		487.3555_509.3384	0.54	36050		36888		33222		34982		35632		33975		35857		37795		31440		34056		35133		34004		36985	35832	33621	29596	37233	36802	34353	35643
0.83_515.39_0.83_537.37	1_LPC 17:0-d5 iSTD	[M+H]+_[M+Na]+		515.3872_537.366	0.8325	67960		68410		61728		61221		68531		65931		65479		66698		57845		67382		66498		64212		67323	66336	67586	63820	65365	68555	64022	64779
1.21_543.42_1.21_565.40	1_LPC 19:0-d5 iSTD	[M+H]+_[M+Na]+		543.4183_565.3987	1.205	33617		32637		30994		30770		34090		34571		36321		33314		29437		33234		37267		34380		34430	32109	34435	32785	36638	35988	34297	35038
0.55_445.31	1_LPE 15:0-d5 iSTD	[M+H]+		445.308	0.546	5050		4606		4240		4311		4947		4485		4511		4412		4070		4373		4467		4976		4925	4486	5332	4852	4155	4310	3968	5429
0.85_473.34_0.85_495.32	1_LPE 17:0-d5 iSTD	[M+H]+_[M+Na]+		473.3393_495.3218	0.847	11324		11090		11101		10654		12101		11272		11568		11975		9112		11760		11079		10351		11238	10905	11099	11139	10633	11551	10529	11517
1.22_501.37	1_LPE 19:0-d5 iSTD	[M+H]+		501.37	1.223	6692		5856		6100		5397		5963		6221		6347		6786		5266		6693		6965		6662		6652	6330	6492	6377	6394	6168	6724	6356
0.70_504.33_0.70_486.32_0.70_526.32	1_LPG 17:0-d5 iSTD	[M+H]+_[M+H-H2O]+_[M+Na]+		504.3347_486.3225_526.3178	0.704	7220		7402		8051		7982		8030		7604		8721		7634		7429		7773		7857		8671		7781	7658	8445	7883	8998	7846	7568	7426
1.05_532.36_1.05_514.35	1_LPG 19:0-d5 iSTD	[M+H]+_[M+H-H2O]+		532.3637_514.3534	1.053	4096		4556		4315		3899		3786		3206		3890		4513		3174		3987		4464		4126		3329	3722	4285	4594	4334	4482	3863	3460
0.40_546.31	1_LPI 15:0-d5 iSTD	[M+H-H2O]+		546.308	0.403	1910		2200		2227		2070		2431		2386		1961		2263		2387		2197		2220		2418		2321	2242	2140	2627	2206	2996	2742	2313
0.62_592.35_0.62_574.34_0.62_614.33	1_LPI 17:0-d5 iSTD	[M+H]+_[M+H-H2O]+_[M+Na]+		592.3454_574.3397_614.3321	0.619333	6594		6233		6206		6670		6848		6267		7818		6915		5602		6846		7361		6773		7243	6875	7606	7211	7106	6499	7004	7097
0.95_620.38_0.95_602.37	1_LPI 19:0-d5 iSTD	[M+H]+_[M+H-H2O]+		620.379_602.3685	0.948	3974		3524		3365		2933		3467		3317		3165		3455		3049		3287		3229		2806		3001	3697	3486	3642	3418	3179	3321	3633
0.43_489.30	1_LPS 15:0-d5 iSTD	[M+H]+		489.297	0.433	1996		1853		2065		1769		2453		2052		1938		2194		2089		2078		2328		1393		1787	1781	1677	1963	1923	2391	1789	2156
0.66_517.33	1_LPS 17:0-d5 iSTD	[M+H]+		517.328	0.66	3436		3038		2641		3099		2840		3320		3228		2750		2662		2899		2819		3595		2491	2708	2208	2885	2759	3373	2506	2766
2.03_723.57_2.03_745.55	1_PC 17:0/14:1-d5 iSTD	[M+H]+_[M+Na]+		723.5704_745.5522	2.0305	79860		79360		78996		95933		91420		78720		78736		80338		72227		82797		82587		75135		77153	74654	74347	73006	77265	79506	79350	79220
2.27_751.60_2.27_773.58	1_PC 17:0/16:1-d5 iSTD	[M+H]+_[M+Na]+		751.6013_773.5836	2.2725	138873		149834		136831		154543		152796		153728		137985		147507		116357		142998		133595		138285		133217	129243	126132	131682	140759	147885	140828	139422
2.52_779.63_2.52_801.61	1_PC 17:0/18:1-d5 iSTD	[M+H]+_[M+Na]+		779.632_801.6133	2.52	199543		212178		192351		197291		208585		204490		207481		207604		171628		214259		202302		200697		209073	203724	197024	202346	202180	206774	201510	211585
2.38_803.63_2.38_825.61	1_PC 17:0/20:3-d5 iSTD	[M+H]+_[M+Na]+		803.633_825.6136	2.3775	123478		128944		122037		125790		123709		131725		131399		133574		114115		123047		129202		126122		126294	124602	120991	120823	129274	130379	120524	127920
2.45_829.65_2.45_851.63	1_PC 17:0/22:4-d5 iSTD	[M+H]+_[M+Na]+		829.6478_851.6287	2.4485	74267		76067		76181		89673		81173		71962		65907		66583		56541		68476		67753		63464		63062	61357	61555	58503	69038	68457	68638	68094
2.08_681.52_2.08_703.50	1_PE 17:0/14:1-d5 iSTD	[M+H]+_[M+Na]+		681.5212_703.5013	2.079	9789		10270		8915		9426		9594		9492		9424		10738		7962		9198		10394		9285		9856	9754	10198	9909	10003	10089	10095	10223
2.33_709.55_2.33_731.54	1_PE 17:0/16:1-d5 iSTD	[M+H]+_[M+Na]+		709.554_731.5352	2.3285	18349		17864		16718		16372		18904		18789		18343		18544		16161		18101		17892		18024		18145	18040	18013	17832	17914	18761	18426	18874
2.58_737.58_2.58_759.57	1_PE 17:0/18:1-d5 iSTD	[M+H]+_[M+Na]+		737.5847_759.5696	2.578	28609		30681		30520		29224		29833		31252		30438		28005		25117		31226		31724		29675		29418	30129	27611	28953	29540	28212	27513	31719
2.43_761.59_2.43_783.57	1_PE 17:0/20:3-d5 iSTD	[M+H]+_[M+Na]+		761.5858_783.5672	2.432	25746		27022		27397		37370		29298		25591		22248		20945		21028		24074		22552		22336		19926	19965	18664	19154	25045	27270	25330	28413
2.50_787.60_2.47_809.58	1_PE 17:0/22:4-d5 iSTD	[M+H]+_[M+Na]+		787.6014_809.5832	2.484	12169		14568		13068		24800		14835		12594		12197		10899		10073		12808		10692		9846		8076	9852	9349	9116	13499	12948	13848	13947
1.89_712.52_1.87_734.50_1.88_729.54	1_PG 17:0/14:1-d5 iSTD	[M+H]+_[M+Na]+_[M+NH4]+		712.5184_734.4987_729.5449	1.879	4139		3516		3967		3823		3629		3751		4094		4341		3393		3458		3967		3255		3387	3776	3746	4019	3893	4626	3585	3548
2.10_762.53	1_PG 17:0/16:1-d5 iSTD	[M+Na]+		762.526	2.098	2294		2432		3285		2884		2544		2841		2629		2273		2210		2617		2263		2281		3110	2222	2736	2303	2442	2498	2294	2264
2.34_768.58_2.33_790.56_2.33_785.60	1_PG 17:0/18:1-d5 iSTD	[M+H]+_[M+Na]+_[M+NH4]+		768.5765_790.5623_785.6047	2.33433	9279		9328		9615		9832		9655		9746		9632		9932		8024		9319		9316		8908		8503	9184	9056	8646	10230	9709	10056	9312
2.20_792.58_2.20_814.56	1_PG 17:0/20:3-d5 iSTD	[M+H]+_[M+Na]+		792.5799_814.5622	2.2005	12704		13157		13519		10183		12594		15222		13374		19348		16977		19262		20666		20224		4908	5477	5259	6032	18589	17840	16335	19189
1.82_822.51	1_PI 17:0/14:1-d5 iSTD	[M+Na]+		822.514	1.817	1074		1668		1005		1712		1316		1018		1061		1389		1088		1196		1500		1317		1747	1146	1231	1167	946	1386	1380	1499
2.04_828.57_2.04_850.54	1_PI 17:0/16:1-d5 iSTD	[M+H]+_[M+Na]+		828.5685_850.5446	2.0375	4175		3703		3812		4095		4533		3764		3572		3759		4081		4870		4636		3394		3622	4290	3618	3624	3964	3625	3711	3948
2.15_880.60_2.15_902.58	1_PI 17:0/20:3-d5 iSTD	[M+H]+_[M+Na]+		880.5984_902.577	2.1455	5107		5208		5124		4192		5906		4878		4659		5574		4450		5658		4843		5101		5144	4728	5265	6260	6063	7890	5072	4871
2.21_906.61_2.21_928.59_2.21_923.64	1_PI 17:0/22:4-d5 iSTD	[M+H]+_[M+Na]+_[M+NH4]+		906.6122_928.5915_923.639	2.20933	8059		8417		7462		6758		6928		9027		7124		8985		10762		10793		9679		10808		3680	3479	4055	3370	10842	10636	9372	9297
1.87_725.51	1_PS 17:0/14:1-d5 iSTD	[M+H]+		725.513	1.866	2809		3093		3308		3109		2807		3232		2676		2453		3101		2774		2867		3478		2067	3130	2623	2792	3100	2762	2958	2885
2.10_753.54_2.10_775.53	1_PS 17:0/16:1-d5 iSTD	[M+H]+_[M+Na]+		753.544_775.5252	2.0975	8181		7321		6918		8407		5847		7842		7950		6723		7199		6916		6968		7374		4929	6189	6063	6672	5807	7226	6440	7741
2.20_805.58_2.20_827.56	1_PS 17:0/20:3-d5 iSTD	[M+H]+_[M+Na]+		805.5757_827.558	2.2005	19837		23005		21031		16845		18007		24660		20515		23625		25419		29362		25319		31121		4457	6148	6558	7067	17671	24688	27673	29090
2.27_831.59	1_PS 17:0/22:4-d5 iSTD	[M+H]+		831.589	2.274	3069		3169		3589		3401		3279		3574		3051		3076		2773		3146		3418		3023		2314	2218	2811	2954	2656	3237	3434	3035
1.88_710.62_1.88_732.60	1_SM 16:1 d18:1/16:1-d9 iSTD	[M+H]+_[M+Na]+		710.616_732.5969	1.883	67059		65725		62694		63468		67055		67232		68462		69589		55824		66379		67988		64411		67617	68020	66243	64409	67418	67089	64696	65816
2.13_738.65_2.13_760.63	1_SM 18:1 d18:1/18:1-d9 iSTD	[M+H]+_[M+Na]+		738.6476_760.629	2.1345	40307		41771		38931		40098		45294		41540		41809		43177		35627		40029		44301		43035		42679	40491	40195	40009	43097	44100	44003	41714
2.38_766.68_2.38_788.66	1_SM 20:1 d18:1/20:1-d9 iSTD	[M+H]+_[M+Na]+		766.6791_788.6605	2.3765	20766		20439		20248		19707		21078		20580		22560		21721		17581		21081		20082		19995		19591	21251	18979	19779	19995	21394	19918	21510
2.62_794.71_2.62_816.69	1_SM 22:1 d18:1/22:1-d9 iSTD	[M+H]+_[M+Na]+		794.7094_816.6915	2.6195	42559		40964		41499		49334		42537		38655		37732		38738		35616		38382		38424		37335		37760	35330	33658	33497	39825	41384	37882	39822
2.86_844.72_2.86_822.74	1_SM 24:1 d18:1/24:1-d9 iSTD	[M+Na]+_[M+H]+		844.7217_822.7407	2.8625	56257		59204		52547		56539		55004		56423		56340		55173		48012		55875		54082		58086		52738	53747	51728	51101	56069	57340	53297	54677
0.45_286.27	1_Sphingosine d17:1 iSTD	[M+H]+	RBEJCQPPFCKTRZ-LHMZYYNSSA-N	286.275	0.454	88527		87546		78310		78976		89756		87048		89238		96997		81549		92998		103002		88325		81899	77731	80078	76878	92257	89424	91092	89201
3.62_752.62_3.62_736.65_3.62_731.69	1_TG 14:0/13:0/14:0-d5 iSTD	[M+K]+_[M+Na]+_[M+NH4]+		752.6231_736.645_731.6926	3.618	30212		30141		27645		19299		27838		29040		31694		36530		27346		32368		32016		32216		32541	33115	32960	32144	28271	32694	27304	31356
3.62_778.64_3.62_762.66_3.62_757.71	1_TG 14:0/15:1/14:0-d5 iSTD	[M+K]+_[M+Na]+_[M+NH4]+		778.6367_762.6624_757.7079	3.619	65990		70917		63622		41959		62831		65509		75301		80848		62535		78168		76750		78194		74942	74896	73842	77172	65237	71892	64543	71602
3.80_806.67_3.82_790.69_3.81_785.74	1_TG 14:0/17:1/14:0-d5 iSTD	[M+K]+_[M+Na]+_[M+NH4]+		806.668_790.6947_785.7388	3.812	39681		35110		26856		11902		27572		38884		73348		99094		61832		88118		71854		103380		108913	109212	115440	115420	44609	44538	42029	45203
3.99_834.70_3.99_818.73_3.98_813.77	1_TG 16:0/15:1/16:0-d5 iSTD	[M+K]+_[M+Na]+_[M+NH4]+		834.6995_818.7266_813.7711	3.98733	116608		110543		93816		51454		93403		119206		151827		170978		131478		170092		151813		162599		145729	154496	151618	148605	119832	127590	117964	124380
4.14_862.73_4.14_846.76_4.13_841.80	1_TG 16:0/17:1/16:0-d5 iSTD	[M+K]+_[M+Na]+_[M+NH4]+		862.7297_846.7574_841.8023	4.134	199842		194422		173206		118122		178928		215684		224767		244702		209134		250588		236928		237518		191465	199825	195875	192532	202585	221880	217579	213653
4.14_888.75_4.14_872.77_4.14_867.82	1_TG 16:0/19:2/16:0-d5 iSTD	[M+K]+_[M+Na]+_[M+NH4]+		888.7461_872.7729_867.818	4.14067	220481		218314		204307		187482		214531		231490		215537		226256		200880		230174		229925		213274		182530	185751	193276	181020	208019	232866	217142	230642
4.12_914.76_4.12_898.79_4.13_893.83	1_TG 18:1/17:1/18:1-d5 iSTD	[M+K]+_[M+Na]+_[M+NH4]+		914.7615_898.7871_893.8336	4.12467	179863		176766		177192		198822		169257		182265		175913		186404		163962		192837		188482		175191		140176	145779	138955	141068	174543	185221	176789	179769
4.14_940.78_4.14_924.80_4.14_919.85	1_TG 18:1/19:2/18:1-d5 iSTD	[M+K]+_[M+Na]+_[M+NH4]+		940.7806_924.805_919.8491	4.13867	117276		117393		108230		82036		112440		122604		118618		123520		108281		125856		125380		115048		97772	102498	101171	96537	108511	122438	115837	120037
4.26_968.81_4.26_952.84_4.26_947.88	1_TG 18:1/21:2/18:1-d5 iSTD	[M+K]+_[M+Na]+_[M+NH4]+		968.8094_952.8351_947.8796	4.26367	60948		67704		66943		62053		63136		62019		58024		57263		48444		56922		57298		51086		45502	46448	47981	43701	57815	59923	52628	62688
					Label	T1_N_L		T1_E_L		T1_S_L		T1_W_L		T2_N_L		T2_E_L		T2_S_L		T2_W_L		T3_N_L		T3_E_L		T3_S_L		T3_W_L		MtdBlank001	MtdBlank002	MtdBlank003	MtdBlank004	PoolQC001	PoolQC002	PoolQC003	PoolQC004
					Sample #	1		3		5		7		9		11		13		15		17		19		21		23		Blank	Blank	Blank	Blank	QC	QC	QC	QC
					Species	English Walnut (Juglans regia)		English Walnut (Juglans regia)		English Walnut (Juglans regia)		English Walnut (Juglans regia)		English Walnut (Juglans regia)		English Walnut (Juglans regia)		English Walnut (Juglans regia)		English Walnut (Juglans regia)		English Walnut (Juglans regia)		English Walnut (Juglans regia)		English Walnut (Juglans regia)		English Walnut (Juglans regia)						English Walnut (Juglans regia)	English Walnut (Juglans regia)	English Walnut (Juglans regia)	English Walnut (Juglans regia)
					Organ	Seed Coat/Pellicle		Seed Coat/Pellicle		Seed Coat/Pellicle		Seed Coat/Pellicle		Seed Coat/Pellicle		Seed Coat/Pellicle		Seed Coat/Pellicle		Seed Coat/Pellicle		Seed Coat/Pellicle		Seed Coat/Pellicle		Seed Coat/Pellicle		Seed Coat/Pellicle						Seed Coat/Pellicle	Seed Coat/Pellicle	Seed Coat/Pellicle	Seed Coat/Pellicle
					Treatment	Light Colored Seed Coat		Light Colored Seed Coat		Light Colored Seed Coat		Light Colored Seed Coat		Light Colored Seed Coat		Light Colored Seed Coat		Light Colored Seed Coat		Light Colored Seed Coat		Light Colored Seed Coat		Light Colored Seed Coat		Light Colored Seed Coat		Light Colored Seed Coat
					File ID	Dandekar018_MX686371_NegCSH_T1-N-L-001.d		Dandekar019_MX686371_NegCSH_T1-E-L-003.d		Dandekar017_MX686371_NegCSH_T1-S-L-005.d		Dandekar015_MX686371_NegCSH_T1-W-L-007.d		Dandekar010_MX686371_NegCSH_T2-N-L-009.d		Dandekar020_MX686371_NegCSH_T2-E-L-011.d		Dandekar013_MX686371_NegCSH_T2-S-L-013.d		Dandekar003_MX686371_NegCSH_T2-W-L-015.d		Dandekar023_MX686371_NegCSH_T3-N-L-017.d		Dandekar014_MX686371_NegCSH_T3-E-L-019.d		Dandekar007_MX686371_NegCSH_T3-S-L-021.d		Dandekar024_MX686371_NegCSH_T3-W-L-023.d		MtdBlank001_MX686371_NegCSH_preDandekar001.d	MtdBlank002_MX686371_NegCSH_NegtDandekar010.d	MtdBlank003_MX686371_NegCSH_NegtDandekar020_002.d	MtdBlank004_MX686371_NegCSH_NegtDandekar024.d	PoolQC001_MX686371_NegCSH_preDandekar001.d	PoolQC002_MX686371_NegCSH_NegtDandekar010.d	PoolQC003_MX686371_NegCSH_NegtDandekar020_002.d	PoolQC004_MX686371_NegCSH_NegtDandekar024.d
Identifier	Annotation	Species	InChI Key	m/z	RT	Peak Height		Peak Height		Peak Height		Peak Height		Peak Height		Peak Height		Peak Height		Peak Height		Peak Height		Peak Height		Peak Height		Peak Height		Peak Height	Peak Height	Peak Height	Peak Height	Peak Height	Peak Height	Peak Height	Peak Height
2.05_601.56	1_Cer 16:1 d18:1-d7/16:1 iSTD	[M+Hac-H]-		601.556	2.05	117778		107138		118488		110126		113450		115909		131225		151221		107205		142283		157131		126442		100315	84205	95319	111762	157314	131923	137704	148429
2.29_629.59	1_Cer 18:1 d18:1-d7/18:1 iSTD	[M+Hac-H]-		629.588	2.294	57318		62854		69612		74149		64024		65263		56911		66642		47580		74193		82814		59660		49069	44038	54261	49785	79713	62130	67451	76803
2.52_657.62	1_Cer 20:1 d18:1-d7/20:1 iSTD	[M+Hac-H]-		657.62	2.52	51028		54663		58866		73605		60218		49850		37700		41086		34574		41572		47136		30820		16579	12243	17836	16740	61372	47764	52555	55485
2.75_685.65	1_Cer 22:1 d18:1-d7/22:1 iSTD	[M+Hac-H]-		685.65	2.749	97709		120139		105123		108181		108322		116483		105734		90696		83936		83334		103416		72503		51328	43090	46161	54321	112679	103175	103315	109619
2.98_713.68	1_Cer 24:1 d18:1-d7/24:1 iSTD	[M+Hac-H]-		713.683	2.975	201665		236911		257882		340709		219250		194287		157104		216959		170061		223041		210058		160408		73096	56636	68643	61370	219177	205384	202442	236573
0.25_339.27	1_CUDA iSTD	[M-H]-	HPTJABJPZMULFH-UHFFFAOYSA-N	339.266	0.252	10193		10641		10179		10006		10883		10599		11393		8470		8542		9747		10119		8764		35493	29199	37117	37760	10769	10011	10724	10631
0.99_258.25	1_FA 16:0-d3 (palmitic acid) iSTD	[M-H]-		258.252	0.991	25544		26919		27067		25644		23903		29633		29796		28284		27623		27167		34427		30798		30272	27375	34373	36226	30376	25860	33018	27854
1.06_290.31	1_FA 18:1-d9 (oleic acid) iSTD	[M-H]-		290.308	1.064	44239		40215		40782		42239		45383		44607		41393		49699		35442		48439		56822		43617		24187	13608	22883	19405	50762	51271	46635	60719
0.75_314.30	1_FA 20:4-d11 (arachidonic acid) iSTD	[M-H]-		314.304	0.751	18253		17503		17333		17494		18814		18389		18382		20036		16778		20788		22119		18299		21306	18851	21169	25563	20788	19916	20058	21588
0.51_545.36	1_LPC 15:0-d5 iSTD	[M+Hac-H]-		545.363	0.508	1719		1813		1528		1739		1574		1796		1801		1765		1602		1705		1952		1889		2270	1818	2128	2304	1972	1794	1817	1829
0.78_573.40	1_LPC 17:0-d5 iSTD	[M+Hac-H]-		573.396	0.779	4656		5252		5069		4850		4812		4426		4299		5289		4614		4786		5979		4853		5595	4681	6340	5650	5485	4699	5183	5784
1.14_601.43	1_LPC 19:0-d5 iSTD	[M+Hac-H]-		601.426	1.141	2486		2689		2669		2864		2437		2806		2472		3189		2315		3086		3535		2795		3630	2585	3557	3040	3336	3035	2831	2789
0.52_443.29	1_LPE 15:0-d5 iSTD	[M-H]-		443.295	0.515	2316		2701		2181		2113		2368		2441		2438		2357		2223		2513		2555		2509		3175	2469	2636	3178	2756	2263	2505	2337
0.80_471.33	1_LPE 17:0-d5 iSTD	[M-H]-		471.326	0.795	7124		7398		6426		7422		6838		7393		7234		7901		6275		8169		9144		7438		8482	7040	8973	9595	8488	7449	8071	8644
1.16_499.36	1_LPE 19:0-d5 iSTD	[M-H]-		499.357	1.161	3789		4747		4276		4483		4166		4758		4557		4811		4023		4523		5701		4891		5055	4417	5880	5012	5164	4695	5032	4774
0.41_474.29	1_LPG 15:0-d5 iSTD	[M-H]-		474.289	0.407	1243		1348		1237		1075		1174		1359		1356		1307		1186		1241		1529		1483		1447	1231	1674	2650	1494	1534	1457	1977
0.60_502.32	1_LPG 17:0-d5 iSTD	[M-H]-		502.318	0.599	5770		6085		5731		5688		5795		5805		5854		6449		5043		6857		7407		6455		7138	6325	6868	8803	7447	5574	6889	7356
0.90_530.35	1_LPG 19:0-d5 iSTD	[M-H]-		530.353	0.9	2948		2966		2892		3392		3116		3477		3230		3432		3135		3406		4124		3413		3888	2945	4130	4363	3986	3467	4042	3880
0.32_562.31	1_LPI 15:0-d5 iSTD	[M-H]-		562.306	0.316	2756		2956		2920		2608		2887		2598		3022		2983		2660		2828		2855		3084		5085	4980	5030	3889	3346	2754	3210	2406
0.53_590.34	1_LPI 17:0-d5 iSTD	[M-H]-		590.339	0.533	4106		4395		3449		3683		4237		3946		4155		4707		3733		4226		5099		5037		5575	4806	6382	7756	4955	3959	5137	5624
0.81_618.37	1_LPI 19:0-d5 iSTD	[M-H]-		618.369	0.806	2557		2581		2205		2708		2323		2596		2463		2971		2276		3013		3413		2994		3391	2532	3624	3920	3046	2612	2977	3216
0.32_487.29	1_LPS 15:0-d5 iSTD	[M-H]-		487.286	0.316	1983		2318		2425		1932		2209		2157		2189		2232		1920		2051		2295		1907		2050	3163	2805	2352	2302	2134	2283	1711
0.53_515.32	1_LPS 17:0-d5 iSTD	[M-H]-		515.316	0.534	3348		3576		2952		3153		3377		3372		3408		3962		3070		3331		4226		4153		4321	3437	3866	4883	4049	3143	4210	4507
0.81_543.35	1_LPS 19:0-d5 iSTD	[M-H]-		543.346	0.811	1575		1565		1456		1503		1377		1582		1620		1859		1432		1757		1992		1724		1582	1510	1657	1892	1818	1546	1769	1934
1.94_781.59	1_PC 17:0/14:1-d5 iSTD	[M+Hac-H]-		781.586	1.94	2591		3218		2257		2058		3302		2793		3158		3506		2390		3106		3779		2936		5576	5189	6071	5695	3823	2158	2932	2693
2.17_809.62	1_PC 17:0/16:1-d5 iSTD	[M+Hac-H]-		809.617	2.165	4935		5027		5494		4081		5134		5091		5227		7168		5158		5238		7132		6155		12585	9930	13460	11371	7071	5070	5466	5135
2.40_837.64	1_PC 17:0/18:1-d5 iSTD	[M+Hac-H]-		837.642	2.401	9889		9571		9599		9164		8711		9638		12267		13270		11236		10656		14374		11281		16217	12259	14818	14111	13786	9216	11055	9786
2.27_861.64	1_PC 17:0/20:3-d5 iSTD	[M+Hac-H]-		861.641	2.267	5190		5851		5356		5117		5020		5707		6402		6607		4723		5176		7057		6255		9429	7898	8162	7933	6581	5591	6022	5411
2.34_887.66	1_PC 17:0/22:4-d5 iSTD	[M+Hac-H]-		887.657	2.336	1968		2152		1937		3189		1811		1980		1644		2179		1407		2099		2083		2024		3940	3308	3699	3399	2357	1939	2186	1718
1.98_679.51	1_PE 17:0/14:1-d5 iSTD	[M-H]-		679.509	1.983	2512		2571		2779		2298		2294		2548		2968		3155		2203		2552		3436		3042		4741	3627	4632	4502	3624	2728	3077	2448
2.21_707.54	1_PE 17:0/16:1-d5 iSTD	[M-H]-		707.541	2.213	6302		6800		5911		5248		6015		6352		5896		6479		5332		5356		6963		5962		11810	8597	10137	10630	7107	6223	6462	6286
2.45_735.58	1_PE 17:0/18:1-d5 iSTD	[M-H]-		735.58	2.449	9934		9363		10791		9931		9644		10806		11764		12540		9764		10756		13717		10639		15124	14450	15335	13474	13566	10589	12225	11517
2.31_759.57	1_PE 17:0/20:3-d5 iSTD	[M-H]-		759.574	2.315	4664		5080		5582		9581		5460		5386		4127		5195		4163		5273		5899		4684		7103	6817	5992	5969	5672	4648	5694	4692
2.38_785.59	1_PE 17:0/22:4-d5 iSTD	[M-H]-		785.588	2.38	1988		1912		1753		2035		2164		1785		2283		2747		2159		1900		2639		2488		3308	2703	2927	3109	2507	2055	2075	2174
1.68_710.50	1_PG 17:0/14:1-d5 iSTD	[M-H]-		710.504	1.68	4848		5194		6420		5212		5452		6497		6043		7897		5749		6360		8910		7234		7052	4854	7613	6969	7596	5700	6335	6786
1.86_738.54	1_PG 17:0/16:1-d5 iSTD	[M-H]-		738.536	1.863	12878		11621		10980		10026		8814		10760		10358		13030		10167		11077		15914		12640		13568	9893	13223	12006	14183	11892	11617	12958
1.95_790.57	1_PG 17:0/20:3-d5 iSTD	[M-H]-		790.568	1.952	10957		12190		12238		17510		12682		11941		11300		11553		8787		10322		15731		10631		11974	10283	12976	13250	14545	10143	13784	12608
2.01_816.58	1_PG 17:0/22:4-d5 iSTD	[M-H]-		816.583	2.012	4097		3645		3789		3528		3645		3822		3942		4496		3546		4376		5519		3879		4533	3577	4352	4926	4899	3478	4311	3716
1.63_798.52	1_PI 17:0/14:1-d5 iSTD	[M-H]-		798.52	1.634	3657		3353		3663		3174		2800		3507		4239		3962		3056		4225		4727		3603		5478	4520	4973	5510	4476	3230	3493	4501
1.81_826.56	1_PI 17:0/16:1-d5 iSTD	[M-H]-		826.561	1.814	8586		8885		8736		8729		8903		9060		9014		9578		7871		9070		10893		7592		11922	9355	12120	10693	10143	8516	10738	9408
2.02_854.58	1_PI 17:0/18:1-d5 iSTD	[M-H]-		854.584	2.015	9915		8966		9241		9124		9534		9006		9461		11492		9134		10021		12596		8882		13898	10696	11599	13663	12145	8208	10210	8437
1.91_878.58	1_PI 17:0/20:3-d5 iSTD	[M-H]-		878.583	1.908	3990		4896		5016		4758		4189		4742		4158		4681		3372		3987		4834		4046		6531	5250	6128	6362	4777	3840	5367	4129
1.97_904.61	1_PI 17:0/22:4-d5 iSTD	[M-H]-		904.606	1.966	2305		2457		2434		2493		2237		2332		2100		2541		2010		2711		3259		2673		3186	2882	3448	3305	3016	2410	2663	2173
1.65_723.51	1_PS 17:0/14:1-d5 iSTD	[M-H]-		723.507	1.645	2547		2651		2434		2190		2163		2457		2616		2955		2380		2848		3359		2894		3590	3399	3876	3773	2773	2215	2590	2766
1.83_751.54	1_PS 17:0/16:1-d5 iSTD	[M-H]-		751.539	1.832	5904		4837		5641		3603		4834		5298		5494		5309		6205		4968		5531		6125		6277	7096	7362	6884	6044	4454	6598	4641
2.04_779.56	1_PS 17:0/18:1-d5 iSTD	[M-H]-		779.563	2.037	5296		5653		5145		3927		5643		5244		5590		7628		5767		6172		7111		6210		6845	7375	6850	7392	7106	5188	5873	5196
1.93_803.56	1_PS 17:0/20:3-d5 iSTD	[M-H]-		803.562	1.928	3003		3475		2650		3010		3528		3387		2816		3767		2705		3735		4186		3439		3894	3797	4108	4084	3431	2426	3460	2851
1.99_829.59	1_PS 17:0/22:4-d5 iSTD	[M-H]-		829.586	1.985	1426		1381		1496		1135		1185		1374		1526		1726		1216		1409		1762		1651		2097	1912	2281	2276	1773	1324	1606	1227
1.80_768.63	1_SM 16:1-d9 d18:1/16:1 iSTD	[M+Hac-H]-		768.625	1.797	8173		7818		7195		7731		7862		7500		8792		8589		6997		7513		9657		8099		12285	9572	11201	10828	9989	6675	9523	6980
2.03_796.65	1_SM 18:1-d9 d18:1/18:1 iSTD	[M+Hac-H]-		796.654	2.033	2225		2620		2376		2003		2617		2599		2659		3068		2372		2725		3280		2783		4880	3838	4517	4109	3487	2449	2777	2290
2.25_824.69	1_SM 20:1-d9 d18:1/20:1 iSTD	[M+Hac-H]-		824.686	2.255	1359		1548		1326		1185		1156		1298		1652		1491		1236		1227		1798		1524		2295	1634	1889	2010	1672	1343	1523	1288
2.49_852.73	1_SM 22:1-d9 d18:1/22:1 iSTD	[M+Hac-H]-		852.726	2.488	3266		2736		3064		3433		3408		3653		3197		3882		2872		3225		4675		3768		5827	4135	5838	5235	4082	3353	3416	3449
2.72_880.75	1_SM 24:1-d9 d18:1/24:1 iSTD	[M+Hac-H]-		880.75	2.721	5430		6326		5732		5011		4976		5942		6387		6587		5863		5318		7210		5857		8557	6993	7460	7378	7595	5740	7279	5904
