# Supplementary material for: Unveiling the “hidden quality” of the walnut pellicle: a precious source of bioactive lipids
Source: Front Plant Sci. 2024 Jun 18;15:1395543. doi: 10.3389/fpls.2024.1395543 (PMC11217525; doi:10.3389/fpls.2024.1395543)
Supplement: Supplementary Table 2 — Raw data of the untargeted metabolomic profile from the analytical Platform 2. [file Table_2.xlsx]

## Sheet: Run Information
Analysis
MiniX:	686404
Client Name:	Noah Feinberg/Abhaya Dandekar
Matrix:	English walnut seed coat
Sample number:	24
Platform:	Polyphenols
Client Requests:
Extraction notes:
Sample Preparation
Resuspension Volume:	100 uL
Resuspension Mix:	75:25 H2O/Acetonitrile with istds
Wellplate Type:	54 vial tray
Positive mode
Instrument:	QE HF
Mobile Phase:	A: 100% H2O + 0.1% Formic acid
	B: 100% Acetonitrile + 0.1% Formic acid
Method:	C:\Xcalibur\methods\2022\CORE\Polyphenol\Polyphenol_pos_AcquityBEHC18_top2_A2B2_10min.meth
Column:	Acquity Premier BEH C18 1.7 um, 2.1 x 50mm
Injection Volume:	5 uL
Start Date:	2022-09-14
Negative mode
Instrument:	QE HF
Mobile Phase:	A: 100% H2O + 0.1% Formic acid
	B: 100% Acetonitrile + 0.1% Formic acid
Method:	C:\Xcalibur\methods\2022\CORE\Polyphenol\Polyphenol_neg_AcquityBEHC18_top2_A2B2_10min.meth
Column:	Acquity Premier BEH C18 1.7 um, 2.1 x 50mm
Injection Volume:	5 uL
Start Date:	2022-09-15
Data processing
MS-DIAL Version:	4.9
Data Technician:	CS
Comments:	Data not normalized
	Leu and Ile cannot be distinguished in dipeptides and tripeptides
	Dipeptides and tripeptides may be in either orientation
	Bad injections: PoolQC001_MX686404_posPP_preDandekar001, MtdBlank003_MX686404_negPP_postDandekar024, PoolQC001_MX686404_negPP_preDandekar001

## Sheet: Data Platform 2
						Label	T1_N_L		T1_E_L		T1_S_L		T1_W_L		T2_N_L		T2_E_L		T2_S_L		T2_W_L		T3_N_L		T3_E_L		T3_S_L		T3_W_L		MtdBlank001	MtdBlank002	PoolQC002	PoolQC003
						Sample #	1		3		5		7		9		11		13		15		17		19		21		23		Blank	Blank	QC	QC
						Species	English Walnut		English Walnut		English Walnut		English Walnut		English Walnut		English Walnut		English Walnut		English Walnut		English Walnut		English Walnut		English Walnut		English Walnut				English Walnut	English Walnut
						Organ	Seed Coat/Pellicle		Seed Coat/Pellicle		Seed Coat/Pellicle		Seed Coat/Pellicle		Seed Coat/Pellicle		Seed Coat/Pellicle		Seed Coat/Pellicle		Seed Coat/Pellicle		Seed Coat/Pellicle		Seed Coat/Pellicle		Seed Coat/Pellicle		Seed Coat/Pellicle				Seed Coat/Pellicle	Seed Coat/Pellicle
						Treatment	Light Colored Seed Coat		Light Colored Seed Coat		Light Colored Seed Coat		Light Colored Seed Coat		Light Colored Seed Coat		Light Colored Seed Coat		Light Colored Seed Coat		Light Colored Seed Coat		Light Colored Seed Coat		Light Colored Seed Coat		Light Colored Seed Coat		Light Colored Seed Coat
						File ID	Dandekar013_MX686404_posPP_T1-N-L-001.raw		Dandekar007_MX686404_posPP_T1-E-L-003.raw		Dandekar012_MX686404_posPP_T1-S-L-005.raw		Dandekar010_MX686404_posPP_T1-W-L-007.raw		Dandekar022_MX686404_posPP_T2-N-L-009.raw		Dandekar021_MX686404_posPP_T2-E-L-011.raw		Dandekar015_MX686404_posPP_T2-S-L-013.raw		Dandekar020_MX686404_posPP_T2-W-L-015.raw		Dandekar005_MX686404_posPP_T3-N-L-017.raw		Dandekar018_MX686404_posPP_T3-E-L-019.raw		Dandekar016_MX686404_posPP_T3-S-L-021.raw		Dandekar023_MX686404_posPP_T3-W-L-023.raw		MtdBlank001_MX686404_posPP_preDandekar001.raw	MtdBlank002_MX686404_posPP_postDandekar012.raw	PoolQC002_MX686404_posPP_postDandekar012.raw	PoolQC003_MX686404_posPP_postDandekar024.raw
						File ID	Dandekar013_MX686404_negPP_T1-N-L-001.raw		Dandekar007_MX686404_negPP_T1-E-L-003.raw		Dandekar012_MX686404_negPP_T1-S-L-005.raw		Dandekar010_MX686404_negPP_T1-W-L-007.raw		Dandekar022_MX686404_negPP_T2-N-L-009.raw		Dandekar021_MX686404_negPP_T2-E-L-011.raw		Dandekar015_MX686404_negPP_T2-S-L-013.raw		Dandekar020_MX686404_negPP_T2-W-L-015.raw		Dandekar005_MX686404_negPP_T3-N-L-017.raw		Dandekar018_MX686404_negPP_T3-E-L-019.raw		Dandekar016_MX686404_negPP_T3-S-L-021.raw		Dandekar023_MX686404_negPP_T3-W-L-023.raw		MtdBlank001_MX686404_negPP_preDandekar001.raw	MtdBlank002_MX686404_negPP_postDandekar012.raw	PoolQC002_MX686404_negPP_postDandekar012.raw	PoolQC003_MX686404_negPP_postDandekar024.raw
Identifier	Annotation	Species	InChI Key	m/z	ESI mode	RT	Peak Height		Peak Height		Peak Height		Peak Height		Peak Height		Peak Height		Peak Height		Peak Height		Peak Height		Peak Height		Peak Height		Peak Height		Peak Height	Peak Height	Peak Height	Peak Height
1.26_167.03	Vanillic acid	[M-H]-	WKOLLVMJNQIZCI-UHFFFAOYSA-N	167.035	ESI neg	1.258	352788		302108		565136		276350		403091		462183		462782		454940		459866		601045		465345		707859		20780	11357	225955	128169
0.84_166.09	Valylphenylalanine	[M+H-C5H9NO]+	GJNDXQBALKCYSZ-UHFFFAOYSA-N	166.086	ESI pos	0.839	681367		565987		635793		483945		992527		409668		521123		339376		551093		536558		573946		811357		147257	34145	190776	269655
0.46_121.06	Tyramine	[M+H-NH3]+	DZGWFCGJZKJUFP-UHFFFAOYSA-N	121.065	ESI pos	0.457	210363		408106		506153		429750		504363		595232		339525		1888368		798546		550135		1050187		606930		87260	25942	188490	233586
2.11_177.05	trans-Ferulic acid	[M+H-H2O]+	KSEBMYQBYZTDHS-HWKANZROSA-N	177.055	ESI pos	2.113	17617338		5414457		10781745		19106712		19847420		11855364		24811382		13797525		5042878		5690876		8089649		6816670		7015	10274	2695187	3154192
0.25_135.03	Threonic acid	[M-H]-	JPIJQSOTBSSVTP-GBXIJSLDSA-N	135.03	ESI neg	0.25	2233324		2335300		8778472		1932255		3340402		3455904		3710732		4887710		3700006		4570697		4342144		5533536		28341	41550	2667814	789907
2.84_195.17	Tetradecanedioic acid	[M+H-CH4O3]+	HQHCYKULIHKCEB-UHFFFAOYSA-N	195.174	ESI pos	2.842	440520		464271		520895		342429		640742		626165		766138		554223		569151		560737		637810		580796		1696	0	132436	152388
1.65_199.06	Syringic acid	[M+H]+	JMSVCTWVEWCHDZ-UHFFFAOYSA-N	199.06	ESI pos	1.651	189523		213680		439525		379738		255943		199505		228430		249665		415127		420277		432215		489311		2385	0	106770	122795
0.27_387.11	Sucrose	[M+CHO2]-	CZMRCDWAGMRECN-UGDNZRGBSA-N	387.114	ESI neg	0.266	68536360		59382548		85875144		119836912		95087600		82113448		59939764		17444122		36314664		28385604		30147732		19369178		692564	226830	40363260	24384968
0.29_117.02	Succinic acid	[M-H]-	KDYFGRWQOYBRFD-UHFFFAOYSA-N	117.019	ESI neg	0.292	794272		1143954		1210502		706046		1114456		1140712		1516832		1504982		1161889		1681788		1584807		1767971		442790	325688	547727	205230
7.04_284.29	Stearamide	[M+H]+	LYRFLYHAGKPMFH-UHFFFAOYSA-N	284.295	ESI pos	7.04	938005		254642		176301		206589		250869		462287		206247		260555		628718		339709		433081		253956		159371	194339	230157	228603
2.75_265.18	Spiculisporic acid	[M+H-CH4O3]+	TUXHHVJPGQUPCF-GUYCJALGSA-N	265.18	ESI pos	2.752	465547		696778		1282179		309273		1221836		1189954		1199527		707042		1677715		2613573		1889356		3523042		2210	3292	230682	255423
7.86_696.54	Soyacerebroside II	[M+H-H2O]+	HOMYIYLRRDTKAA-DNZXWUPJSA-N	696.541	ESI pos	7.857	208653		148780		143481		62322		248102		182861		222938		169480		341488		297321		410416		276830		0	0	169112	188408
2.09_339.11	Simmondsin 2'-ferulate	[M+H-C10H15NO4]+	GWXJMPVVJCHQIB-PDZFWYMXSA-N	339.107	ESI pos	2.09	2803655		903628		1702966		3021370		3035720		1896358		3856865		2321549		794123		1023916		1331889		1222278		0	0	422171	462523
1.68_139.04	Shikimic acid	[M+H-2H2O]+	JXOHGGNKMLTUBP-HSUXUTPPSA-N	139.039	ESI pos	1.675	2551859		1862445		3238635		1748509		2284041		3087330		2985860		2822824		2780334		3170000		2752082		3097234		9128	14116	545901	618930
0.43_182.08	Ser-Tyr	[M+H-C3H5NO2]+	MALNXHYEPCSPPU-VHSXEESVSA-N	182.081	ESI pos	0.428	921332		673441		1188191		460788		1360802		669831		850216		776740		909047		1021487		946795		1515676		34966	0	384036	494938
2.33_415.16	Sayaendoside	[M-H]-	UWKRNCNWJVCHGZ-DERWZFJFSA-N	415.161	ESI neg	2.328	2134316		2233285		3066976		1775184		2076580		2796035		4202993		1985086		1742424		2754236		2215561		2702038		0	0	1097554	515502
2.01_163.08	Salsolinol	[M+H-NH3]+	IBRKLUSXDYATLG-LURJTMIESA-N	163.075	ESI pos	2.014	957713		502248		741187		575303		704744		691317		1316757		631237		312298		374981		346810		368194		36885	20457	238112	246392
1.62_299.11_1.62_345.12	Salidroside	[M-H]-_[M+CHO2]-	ILRCGYURZSFMEG-RKQHYHRCSA-N	299.1135_345.119	ESI neg	1.6235	6704822		4397441		6450950		4936172		6432482		8268486		9333879		9059007		5495470		7370604		8493621		7281199		0	0	3090351	1411116
2.55_449.11	Quercitrin	[M+H]+	OXGUCUVFOIWWQJ-HQBVPOQASA-N	449.108	ESI pos	2.552	284892		395698		451938		304969		457837		408259		567022		472626		394204		492623		521666		543682		0	0	114877	105442
0.42_170.08	Pyridoxine	[M+H]+	LXNHXLLTXMVWPM-UHFFFAOYSA-N	170.081	ESI pos	0.421	4189590		4529732		6742126		2546238		3635794		4529758		6202266		4643116		6408460		6001928		6276489		5677614		0	0	1849571	2145832
1.75_865.20	Procyanidin C1	[M-H]-	MOJZMWJRUKIQGL-CGFIDGTHSA-N	865.199	ESI neg	1.746	1358533		926384		1620180		1188455		1202575		1587359		1617305		1317951		1634304		1714439		1696434		1613563		0	0	701164	481456
1.59_579.15	Procyanidin B2	[M+H]+		579.15	ESI pos	1.586	11092539		8086616		518871		6285598		9818722		11483939		12863576		11172355		10635812		11872538		10862408		14215113		0	3404	2729101	2998113
1.34_347.10	Picraquassioside D	[M+CHO2]-	SJBWDSQCMPAGHA-UHFFFAOYSA-N	347.098	ESI neg	1.337	1018835		390876		816006		403039		620310		732360		863657		766193		432068		568092		733782		777783		0	0	359644	166278
4.95_318.30	Phytosphingosine	[M+H]+	AERBNCYCJBRYDG-KSZLIROESA-N	318.3	ESI pos	4.954	2075260		1422778		1325067		214267		3042011		2229528		1967002		1717521		4447919		3504708		3658704		4586080		1562	20694	1394192	1184227
2.73_435.13	Phlorizin	[M-H]-	IOUVKUPGCMBWBT-QNDFHXLGSA-N	435.13	ESI neg	2.728	3989673		3583383		5897292		2507551		4338978		5152741		6178336		4838763		4217482		5139198		5443700		6122028		0	0	1892131	669246
4.82_280.26	Palmitoleoyl ethanolamide	[M+H-H2O]+	WFRLANWAASSSFV-FPLPWBNLSA-N	280.263	ESI pos	4.823	128020		77107		116282		24512		275448		254257		294725		108317		530488		565310		526407		859670		0	0	55788	69076
6.49_256.26	Palmitamide	[M+H]+	HSEMFIZWXHQJAE-UHFFFAOYSA-N	256.263	ESI pos	6.486	2251386		703116		416411		640316		540058		1487873		506573		691326		1231796		912892		1056829		625139		380375	566091	357219	392320
7.10_310.31	Oleoyl ethylamide	[M+H]+	JZJYYCFYGXPUMF-QXMHVHEDSA-N	310.31	ESI pos	7.099	179664		44279		30982		21391		56226		221401		42419		70636		290569		428205		44773		64657		5479	13189	88990	82454
6.61_282.28	Oleamide	[M+H]+	FATBGEAMYMYZAF-KTKRTIGZSA-N	282.279	ESI pos	6.609	7485937		3420839		4513556		1702812		6299842		8359023		3463136		3904644		9776665		9739815		6855243		8281126		12216	24350	3117674	2303504
0.26_203.15	NG,NG-Dimethyl-L-arginine	[M+H]+	YDGMGEXADBMOMJ-LURJTMIESA-N	203.15	ESI pos	0.259	890918		764515		1122846		333510		1201521		855823		1453209		759210		1929519		1882362		1715484		3054599		0	0	337752	413690
2.31_273.08	Narirutin	[M+H-C12H20O9]+	HXTFHSYLYXVTHC-TUURGLJWSA-N	273.075	ESI pos	2.308	2287838		2653232		3294319		1379530		2110564		1396250		3231447		2456770		2470476		2345274		2228422		2609958		0	0	672860	756592
3.31_273.08	Naringin dihydrochalcone	[M-H-C12H20O9]-	CWBZAESOUBENAP-QVNVHUMTSA-N	273.077	ESI neg	3.31	346885		634660		656562		190149		726424		688292		637993		623760		600284		1175951		989536		1245170		0	0	176873	56696
2.61_435.13	Naringenin-7-O-glucoside	[M+H]+	DLIKSSGEMUFQOK-RGHIGTIISA-N	435.128	ESI pos	2.607	2704170		2850194		3267004		762121		1926523		3029075		3887779		2563169		1753031		1655228		2169399		1606162		0	0	658944	645206
3.26_271.06	Naringenin	[M-H]-	FTVWIRXFELQLPI-ZDUSSCGKSA-N	271.061	ESI neg	3.261	1029708		1486891		1734331		547360		1330462		1716907		1826353		1414132		1345923		1685687		1425125		1743418		0	2032	776934	272410
6.43_326.31	N-Oleoylethanolamine	[M+H]+	BOWVQLFMWHZBEF-KTKRTIGZSA-N	326.305	ESI pos	6.433	278831		233868		397004		132416		418046		690746		1078515		281893		656018		901968		907057		1883207		0	0	134402	123091
1.68_144.08	N-Methyltryptamine	[M+H-CH5N]+	NCIKQJBVUNUXLW-UHFFFAOYSA-N	144.081	ESI pos	1.676	2272001		1817907		1831077		1373155		2744561		1835673		2134163		1877151		1730369		2302303		1864920		1722317		4374	0	608321	455413
6.05_360.36	N-Benzyl-N,N-dimethyl-1-hexadecanaminium cation	[Cat]+	QDYLMAYUEZBUFO-UHFFFAOYSA-N	360.362	ESI pos	6.051	31870		24121		8936		13555		31921		204697		11792		40544		29800		19259		59224		15229		34370	9523	37203	25953
1.46_205.10	N-Acetyltryptophan	[M+H-C2H2O]+	DZTHIGRZJZPRDV-UHFFFAOYSA-N	205.097	ESI pos	1.458	4040322		2365391		5624696		2653329		4028562		2402573		2894680		2326200		2654775		2857780		3053904		4085056		39920	2670	784473	946296
0.24_145.06	N-Acetyl-L-glutamine	[M-H-C2H2O]-	KSMRODHGGIIXDV-YFKPBYRVSA-N	145.062	ESI neg	0.239	4000113		1613692		4583144		2602540		3645866		2555188		3197284		2605267		2446347		1984874		1878210		4388997		38157	35570	1376674	779136
0.26_256.06	N-Acetyl-D-glucosamine	[M+Cl]-	OVRNDRQMDRJTHS-PVFLNQBWSA-N	256.06	ESI neg	0.255	3385326		2685933		5085488		1604527		4078770		4593617		6223232		6068959		3730018		4809517		5121614		7264908		0	0	1824166	564364
2.77_119.09	N-(4-Ethylbenzyl)-N-methylamine	[M+H-CH5N]+	JCSDSVXBTRWEJS-UHFFFAOYSA-N	119.085	ESI pos	2.773	3402935		3196232		4456654		1976776		3115444		3394188		4077506		3445588		2961657		2692624		2923646		2951596		151580	122142	883814	873344
1.20_127.04	myo-Inositol	[M+H-3H2O]+	CDAISMWEOUEBRE-GPIVLXJGSA-N	127.039	ESI pos	1.204	410913		314956		1630309		1743090		971841		599187		693394		818386		802110		704125		3399851		1263028		353978	283728	418483	677546
0.26_191.02_0.25_209.03	Mucic acid	[M-H-H2O]-_[M-H]-	DSLZVSRJTYRBFB-DUHBMQHGSA-N	191.0197_209.0303	ESI neg	0.2525	8196986		6351774		12707715		3351570		10770724		13624586		14765391		14116792		11165969		13196973		13201375		16620006		309893	190598	3569545	1139847
6.61_265.25	Monoelaidin	[M+H-C3H8O3]+	RZRNAYUHWVFMIP-MDZDMXLPSA-N	265.252	ESI pos	6.61	61487		27636		34886		13463		46998		72959		23742		31055		79941		71008		54148		60528		1449	2262	25806	16837
1.66_183.03	Methylgallate	[M-H]-	FBSFWRHWHYMIOG-UHFFFAOYSA-N	183.03	ESI neg	1.664	5547828		3493074		5160676		3271140		6185898		4811814		3677516		3940082		2816547		3090660		2174053		2961242		755138	893007	3965407	2614420
0.26_527.16	Melezitose	[M+Na]+	QWIZNVHXZXRPDR-WSCXOGSTSA-N	527.158	ESI pos	0.255	421781		406010		265245		718202		653095		361304		251241		511889		717911		571708		674547		871259		0	0	308885	291601
0.28_133.01	Malioxamycin	[M-H-C5H10N2O]-	KXQRAPMNPUXYGT-VDTYLAMSSA-N	133.014	ESI neg	0.284	73169568		23949790		209037920		58576960		72271440		79276232		94714456		97409240		44179240		43988492		60384172		52154440		329630	207043	22605976	7962854
6.03_324.29	Linoleoyl ethanolamide	[M+H]+	KQXDGUVSAAQARU-HZJYTTRNSA-N	324.289	ESI pos	6.03	237083		129471		566881		431444		848967		884694		933642		540259		977019		1316356		1185508		1854969		0	2040	108199	104773
0.30_182.08	L-Tyrosine	[M+H]+	OUYCCCASQSFEME-UHFFFAOYSA-N	182.081	ESI pos	0.296	3361125		3994975		5818946		2949077		7569447		3850772		4956518		4100770		4889787		5213538		5112138		8590646		249708	38722	860999	740520
1.48_188.07	L-Tryptophan	[M+H-NH3]+	QIVBCDIJIAJPQS-SECBINFHSA-N	188.071	ESI pos	1.482	2200023		1380172		3260454		1461728		2237780		1305848		1649434		1280219		1483698		1548037		1733028		2365266		19054	39228	422853	545477
0.25_130.05_0.24_147.08	L-Glutamine	[M+H-NH3]+_[M+H]+	ZDXPYRJPNDTMRX-VKHMYHEASA-N	130.0498_147.0763	ESI pos	0.246	17826302		5619308		19931475		13216717		16491881		8930626		14191946		8420268		9030477		5619849		5677748		13129095		132001	89902	3219399	3287533
0.28_165.08_0.27_211.08	L-Fucitol	[M-H]-_[M+CHO2]-	SKCKOFZKJLZSFA-KCDKBNATSA-N	165.0767_211.0823	ESI neg	0.2755	3958793		5478716		4966057		2328829		3191289		3402389		4576165		7333881		3663312		8838241		7388022		13044553		0	2310	3997143	2118234
0.27_162.11	L-Carnitine	[M+H]+	PHIQHXFUZVPYII-ZCFIWIBFSA-N	162.112	ESI pos	0.273	826174		894862		2537032		1985838		1378298		650105		1447322		1620542		1691769		1267350		2049640		2778318		57202	23449	417730	459560
2.35_465.10	Isoquercitin	[M+H]+	OVSQVDMCBVZWGM-LQSBFMDOSA-N	465.102	ESI pos	2.349	540618		457059		645003		340052		568986		655800		680382		694312		655917		671439		617137		862518		0	0	155650	177466
2.35_463.09	Hyperin	[M-H]-	OVSQVDMCBVZWGM-DTGCRPNFSA-N	463.088	ESI neg	2.345	626153		580821		681680		443115		691918		745158		805424		748980		677339		679628		758917		978156		0	0	374502	167137
2.57_441.20_2.58_395.19	Hexyl 6-O-pentopyranosylhexopyranoside	[M+CHO2]-_[M-H]-	PSYNCYUUTFEJHA-UHFFFAOYSA-N	441.1977_395.192	ESI neg	2.5755	174080		373056		263150		149399		360970		246090		158314		329182		787889		754495		905764		1010242		0	0	185537	62989
2.14_167.07	Harpagoside	[M+H]+		167.07	ESI pos	2.137	684772		1075021		2212286		2073030		1055694		847972		1148723		1264002		2706011		2755743		4747313		3390970		31775	26875	474312	475977
0.51_483.08	Hamamelitannin	[M-H]-		483.078	ESI neg	0.505	2709098		1621928		2177046		839463		2838259		2283158		2075054		2237176		2106454		2828312		2575314		2805350		0	0	1771985	663549
1.27_139.04	Grevillic acid	[M+H-C2H2O]+	JXIPYOZBOMUUCA-DAFODLJHSA-N	139.039	ESI pos	1.271	387622		358441		798411		482963		329209		374119		445735		543617		847762		835873		940457		1242590		16913	19451	130693	190816
0.25_258.11	Glycerophosphocholine	[M+H]+	SUHOQUVVVLNYQR-MRVPVSSYSA-N	258.11	ESI pos	0.248	3787516		2791116		4887136		6909950		6510244		2464267		2653016		1087402		2074581		1329365		1482302		1456444		3055	3410	818086	803897
1.37_179.06	Glucose	[M-H]-	GZCGUPFRVQAUEE-SLPGGIOYSA-N	179.056	ESI neg	1.374	638837		580529		917747		456157		514843		719847		807849		651195		810372		778473		688092		1122271		176545	112390	516777	289319
0.29_152.06	Ginkgotoxin	[M+H-CH4O]+	SVINQHQHARVZFF-UHFFFAOYSA-N	152.057	ESI pos	0.293	1068616		1502500		1787614		802109		1187064		1666026		1673577		1218115		1851854		2139057		1721029		2672652		0	0	243805	274646
0.26_549.17	Gentianose	[M+CHO2]-	MUPFEKGTMRGPLJ-WSCXOGSTSA-N	549.167	ESI neg	0.261	4030841		5044759		6381459		6544694		5908031		5777254		3120101		4470452		4721312		5262849		6055324		6664940		57973	4483	2269104	960231
0.47_125.02	Gallic acid	[M-H-CO2]-	LNTHITQWFMADLM-UHFFFAOYSA-N	125.024	ESI neg	0.465	1264727		814453		955208		510540		1150673		999262		967073		1240837		789745		963528		836493		1154786		113262	122101	1343496	666488
2.94_287.06	Flavanomarein	[M-H-C6H10O5]-	DGGOLFCPSUVVHX-RTHJTPBESA-N	287.056	ESI neg	2.945	740220		727291		2930504		209998		884742		646755		809597		1748227		860730		680419		591454		608150		0	0	410236	148290
7.51_338.34	Erucamide	[M+H]+	UAUDZVJPLUQNMU-KTKRTIGZSA-N	338.341	ESI pos	7.515	2027919		877798		573163		511473		1002198		2411265		693931		1329821		4678278		5510990		634029		886211		422078	385986	1169621	1249913
2.38_449.11	Eriodictyol-7-O-glucoside	[M-H]-	RAFHNDRXYHOLSH-SFTVRKLSSA-N	449.109	ESI neg	2.38	544048		589607		830852		294239		397978		511323		621710		524632		312140		489690		339515		602056		0	0	376652	163342
0.47_169.01	Epigallocatechin gallate	[M-H-C15H12O6]-	WMBWREPUVVBILR-WIYYLYMNSA-N	169.014	ESI neg	0.467	37836968		24404144		28013844		13711402		33881804		27214710		26924740		35444172		22704340		26541338		24066062		31242026		268845	155622	39375516	19162644
2.30_441.08	Epicatechin gallate	[M-H]-	LSHVYAFMTMFKBA-TZIWHRDSSA-N	441.083	ESI neg	2.302	1657187		1392755		2184946		1274462		2215336		2159762		2316864		2034308		1583643		2228914		2307128		2226412		0	0	760990	260511
1.68_291.09	Epicatechin	[M+H]+	PFTAWBLQPZVEMU-UKRRQHHQSA-N	291.086	ESI pos	1.676	38544916		26038100		50205996		24068810		34188904		44532480		44352500		42676852		41620676		48194804		41537320		47949600		0	0	6730960	7507217
2.24_303.01	Ellagic acid	[M+H]+	AFSDNFLWKVMVRB-UHFFFAOYSA-N	303.013	ESI pos	2.241	641583		722985		960266		440338		988472		855757		734127		706096		758303		1008467		793165		897652		0	59182	495950	679829
3.76_149.13_3.76_195.14	Dodecanedioic acid	[M+H-CH6O4]+_[M+H-2H2O]+	TVIDDXQYHWJXFK-UHFFFAOYSA-N	149.1324_195.1379	ESI pos	3.762	3412702		2012497		9141594		3411700		6192607		9818401		8679909		7791802		7270766		9372580		9955509		11215582		143214	101576	1128183	1202952
2.63_549.26	Docynicaside A	[M+CHO2]-	LYJZPTUVRHPVNB-WRZQMYAXSA-N	549.255	ESI neg	2.631	1394686		997466		1916700		430746		1189866		1447793		1812760		1750586		1067168		1757714		935051		1118364		0	0	544804	231509
0.23_175.12	DL-Arginine	[M+H]+	ODKSFYDXXFIFQN-UHFFFAOYSA-N	175.119	ESI pos	0.234	12376187		3567970		7273663		11569704		16298835		6907108		4486987		1310020		2783646		2502428		2226761		2605426		97426	79664	1631596	1692942
2.73_149.10	Dimethyl sebacate	[M+H-C2H10O3]+	ALOUNLDAKADEEB-UHFFFAOYSA-N	149.096	ESI pos	2.734	593205		1072286		874966		387502		977480		1115115		844444		1304960		1260453		1160231		1057077		1192969		20890	16104	174880	221794
1.73_265.14_1.73_247.13	Dihydrophaseic acid	[M+H-H2O]+_[M+H-2H2O]+	XIVFQYWMMJWUCD-FJBUYRLMSA-N	265.1433_247.1327	ESI pos	1.728	19867946		16948210		21000121		13655570		21569866		24046184		23745092		21950605		26322557		21838462		23069205		24087278		18186	4994	7459009	7646508
3.81_192.14	Diethyltoluamide	[M+H]+	MMOXZBCLCQITDF-UHFFFAOYSA-N	192.138	ESI pos	3.809	175607		120597		150036		184477		1019661		138567		155838		904115		138879		119801		186861		1173982		78166	63223	87588	76952
0.25_143.03	D-Turanose	[M-H-C6H14O7]-	RULSWEULPANCDV-PIXUTMIVSA-N	143.035	ESI neg	0.246	1147942		1133613		4167918		784271		1458210		1943077		1575794		2501943		1987649		2192574		1749983		1780585		106032	94876	1004139	581170
0.24_181.07	D-Sorbitol	[M-H]-	FBPFZTCFMRRESA-JGWLITMVSA-N	181.072	ESI neg	0.242	5118178		7120450		8533287		3630831		6073552		6708444		8134074		7261896		8704776		12359990		10684530		11599483		326464	102029	4200596	2101214
0.29_173.01	D-Saccharic acid 1,4-lactone	[M-H-H2O]-	XECPAIJNBXCOBO-MMPJQOAZSA-N	173.009	ESI neg	0.292	873441		943488		1676690		852336		1572442		1335034		1754136		1701166		1638342		2156983		1998445		2244181		0	3954	332857	80547
0.25_215.03	D-Psicose	[M+Cl]-	BJHIKXHVCXFQLS-PUFIMZNGSA-N	215.033	ESI neg	0.246	32190856		14709306		106108768		22494374		34946148		50116060		41243692		57402204		25664948		21706230		22531306		29665606		333886	75282	12493397	6554270
5.41_595.29	D-myo-Inositol, 1-[2-hydroxy-3-[(1-oxo-9,12-octadecadienyl)oxy]propyl hydrogen phosphate], [S-(Z,Z)]-	[M-H]-	SAHCQBPGXQFTRA-MTWZWZNHSA-N	595.289	ESI neg	5.411	211760		132481		248239		192655		372392		169478		182043		173449		131355		167597		211051		159172		0	0	86965	29313
0.25_195.05	D-Gluconic acid	[M-H]-	RGHNJXZEOKUKBD-SQOUGZDYSA-N	195.051	ESI neg	0.248	11521361		5209841		18462716		4353188		11435705		9078564		11986072		11958668		7937310		6022564		5924106		8236977		134035	88265	4836912	1885867
0.26_127.04	D-Fructose	[M+H-3H2O]+	BJHIKXHVCXFQLS-UYFOZJQFSA-N	127.039	ESI pos	0.262	5743783		2667997		9630066		9055139		5979680		4968948		4810266		4304392		2696795		2814355		2552656		2480766		496471	423584	1777717	2403847
0.26_377.09_0.27_341.11_0.27_683.23	D-(+)-Trehalose	[M+Cl]-_[M-H]-_[2M-H]-	HDTRYLNUVZCQOY-LIZSDCNHSA-N	377.0855_341.1088_683.2254	ESI neg	0.265333	55515116		39080218		76996032		95446845		76401054		60440068		45585700		21433023		26936803		20241485		24366421		18159330		496178	137216	23043764	12919112
0.25_165.04	D-(+)-Ribonic acid .gamma.-lactone	[M+OH]-	CUOKHACJLGPRHD-BXXZVTAOSA-N	165.04	ESI neg	0.248	4319923		2738858		10660299		2791041		6106222		6904312		6787122		7540182		7495668		7395331		8083092		9411816		36510	47169	4895238	1548241
0.25_132.08	Creatine	[M+H]+	CVSVTCORWBXHQV-UHFFFAOYSA-N	132.077	ESI pos	0.248	958996		692421		86273		2043068		1339813		645013		75979		65003		43324		50750		71261		119951		182170	175619	109405	137338
1.70_633.07	Corilagin	[M-H]-	TUSDEZXZIZRFGC-UHFFFAOYSA-N	633.073	ESI neg	1.702	60864688		46720524		58559516		29238626		71010768		63506276		59527876		63202040		54168704		63661128		52628404		61609312		65092	122352	33258892	16677959
0.25_159.08_0.25_176.10	Citrulline	[M+H-NH3]+_[M+H]+	RHGKLRLOHDJJDR-BYPYZUCNSA-N	159.0763_176.1029	ESI pos	0.2465	48409244		10997532		61999028		10265427		17558727		16407730		31393224		28295704		12508022		8975158		7325263		14497644		123546	45599	5925462	6467908
0.30_191.02	Citric acid	[M-H]-	KRKNYBCHXYNGOX-UHFFFAOYSA-N	191.02	ESI neg	0.301	45027136		33083696		80498824		54353372		93614872		52011136		88875472		61261192		32300070		36431276		37897756		66982484		296952	190598	14825779	2832119
5.33_309.28	cis-11,14-Eicosadienoic acid	[M+H]+	XSXIVVZCUAHUJO-HZJYTTRNSA-N	309.279	ESI pos	5.334	188566		135835		226429		60554		146245		125565		160175		197148		149618		185244		107767		245264		0	0	35385	49203
0.24_104.11	Choline cation	[Cat]+	OEYIOHPDSNJKLS-UHFFFAOYSA-N	104.107	ESI pos	0.238	255708672		210480480		355420320		176937312		274721216		249340064		308327136		296460288		315509792		333585120		308247520		349210464		372970	390849	126816136	121774040
0.29_118.09	Betaine	[M+H]+	KWIUHFFTVRNATP-UHFFFAOYSA-N	118.086	ESI pos	0.291	32047366		15685638		36427216		13425665		26453800		16533131		28197462		19988344		16574375		16925214		15673292		34304876		2577780	1052620	6169054	6750678
5.62_332.33	Benzyldimethyltetradecylammonium cation	[Cat]+	WNBGYVXHFTYOBY-UHFFFAOYSA-N	332.331	ESI pos	5.624	87717		68285		58633		57747		164474		608172		78738		161168		88992		73884		205598		84688		137207	36949	105564	82894
0.45_317.09	Arbutin	[M+CHO2]-	BJRNKVDFDLYUGJ-RMPHRYRLSA-N	317.088	ESI neg	0.445	1985874		2032960		3015214		1046802		1570660		2462734		2268476		2307089		3860136		3755501		3996823		5009064		0	0	1702735	1189350
2.09_282.17	Ambrosic acid	[M+NH4]+	ZONXEWIGPLHXNT-ULEBWITMSA-N	282.17	ESI pos	2.088	114036		199682		138448		50162		115581		68681		87706		106292		192031		113299		94795		142053		2113	0	75006	72346
5.09_293.21	9S-Hydroxy-10E,12Z,15Z-octadecatrienoic acid	[M-H]-	RIGGEAZDTKMXSI-MEBVTJQTSA-N	293.212	ESI neg	5.087	151911		139744		602205		266335		421482		494561		480398		452736		576893		1000903		808472		666167		0	0	115558	45336
5.57_293.21	9S-Hydroperoxy-10E,12Z-octadecadienoic acid	[M-H-H2O]-	JGUNZIWGNMQSBM-UINYOVNOSA-N	293.212	ESI neg	5.573	1039138		852491		2204676		635317		1685535		1887945		2207965		2271946		1568938		2594219		2380828		2568811		0	0	401913	140252
5.86_297.24	9(10)-Epoxy-12Z-octadecenoic acid	[M+H]+	FBUKMFOXMZRGRB-XKJZPFPASA-N	297.242	ESI pos	5.857	421772		206449		601938		171193		367949		539148		769416		341684		318659		564605		467428		674182		66742	51393	104561	100097
4.82_313.24	9,10-Dihydroxy-12Z-octadecenoic acid	[M-H]-	XEBKSQSGNGRGDW-CJWPDFJNSA-N	313.239	ESI neg	4.822	396818		289674		762990		274650		602849		664250		750965		753684		765386		1076119		994147		1089083		13267	15595	203460	89785
3.76_177.13	9,10-Dihydrojasmonic acid	[M+H-2H2O]+	PQEYTAGBXNEUQL-NXEZZACHSA-N	177.127	ESI pos	3.761	312916		175452		851047		337676		602382		870490		784758		713174		667392		880652		942462		1041028		15142	11905	112981	120878
5.58_277.22	9-Oxo-10E,12Z-octadecadienoic acid	[M+H-H2O]+	LUZSWWYKKLTDHU-ZJHFMPGASA-N	277.216	ESI pos	5.58	472741		366156		837103		268139		742042		732930		776348		791039		771277		1197580		903600		1033810		2739	2212	93449	102850
5.65_293.21	9-Oxo-10(E),12(E)-octadecadienoic acid	[M-H]-	LUZSWWYKKLTDHU-SIGMCMEVSA-N	293.212	ESI neg	5.649	881349		508930		1598748		476201		1281937		1701816		1500866		1455759		1168374		1690139		1597781		1761856		0	0	288468	125385
5.27_293.21	9-Hydroperoxy-10E,12Z,15Z-octadecatrienoic acid	[M+H-H2O]+	RWKJTIHNYSIIHW-MEBVTJQTSA-N	293.211	ESI pos	5.273	200735		140026		477766		194523		444957		481255		527460		392656		515809		756957		740870		674434		2418	1941	58319	54037
0.24_179.06	9-Fluorenone	[M-H]-	YLQWCDOCJODRMT-UHFFFAOYSA-N	179.056	ESI neg	0.245	15673602		14653607		51196348		10330941		19251084		25124530		20598020		32308502		25289662		27972860		22271222		23681580		292766	145806	12979551	7484244
2.25_261.13	9-(2,3-Dihydroxypropoxy)-9-oxononanoic acid	[M-H]-	BQRISQXLSXCXSC-UHFFFAOYSA-N	261.134	ESI neg	2.25	2206982		4263274		5305849		4227968		6158316		3943874		2662922		2439066		4474460		3170760		4013991		2977388		2739	1930	1720275	811391
2.64_177.16_2.65_195.17	7,8-Dihydro-.alpha.-ionone	[M+H-H2O]+_[M+H]+	JHJCHCSUEGPIGE-UHFFFAOYSA-N	177.1638_195.1743	ESI pos	2.6445	1608429		961382		1451263		693061		859336		1446301		1428122		1381157		1329978		1088552		1095654		1043707		5321	2529	322671	357525
2.37_441.08	7-Galloylcatechin	[M-H]-	WKIHBIBUCQPPBY-NQIIRXRSSA-N	441.083	ESI neg	2.37	440677		382999		625286		441864		879015		710597		729691		737902		493904		655380		781400		791009		0	0	268520	140373
2.37_285.06	6-Thioinosine	[M+H]+	NKGPJODWTZCHGF-DEGSGYPDSA-N	285.06	ESI pos	2.365	459966		568399		708882		321233		690385		683226		622573		755192		876908		1454027		776656		1172021		0	0	169942	164006
2.52_177.05_2.52_339.11	6-O-((2Z)-3-(4-Hydroxy-3-methoxyphenyl)prop-2-enoyl)-.beta.-D-fructofuranosyl 6-O-acetyl-.alpha.-D-glucopyranoside	[M+H-C14H24O12]+_[M+H-C8H14O7]+	ZIUKDKVKRXUKAP-GOJYQDROSA-N	177.0546_339.1073	ESI pos	2.518	998970		758700		1128347		726381		1571800		1468881		1254241		2024039		1270445		1365929		1306851		1398749		5191	7170	358263	380194
2.41_477.10	6-O-((2E)-3-(4-Hydroxyphenyl)prop-2-enoyl)-1-O-(3,4,5-trihydroxybenzoyl)hexopyranose	[M-H]-	LWOXGQKLDYQLMZ-ZZXKWVIFSA-N	477.104	ESI neg	2.409	716698		533274		1048816		1591644		1921746		1610220		1833652		3500564		535607		563629		2579828		1247516		0	0	556985	228660
2.50_223.13	5-[(1E,3E)-Hepta-1,3-dienyl]-2,3-dihydroxycyclopentane-1-carboxylic acid	[M+H-H2O]+	QNHUKXZHEMSPPA-YTXTXJHMSA-N	223.133	ESI pos	2.496	248841		291027		328073		126714		220101		283951		246138		415474		421298		279329		237979		481297		19495	20286	87851	95050
3.76_213.15	5-(Hydroxymethyl)-3-(1-hydroxy-4-methylhexyl)oxolan-2-one	[M+H-H2O]+	KWEIJKWXQKCOKC-UHFFFAOYSA-N	213.148	ESI pos	3.762	1557348		943055		4720876		1669277		2919633		4492809		4294851		3733642		3763672		4593802		4720266		5233124		91344	60080	561589	547757
2.53_225.15	5-(6-Methyl-7-oxooctyl)furan-2(5H)-one	[M+H]+	MSOHKYKACHEERC-UHFFFAOYSA-N	225.148	ESI pos	2.533	3318846		2855286		3861528		1173564		2716926		3619415		4635390		2892262		4436967		4734086		3693090		5479044		21282	18415	974961	1013251
2.08_175.04_2.09_337.09	4,8-Dihydroxynaphthalen-1-yl .beta.-D-glucopyranoside	[M-H-C6H10O5]-_[M-H]-	LASMTIIWUCJLEH-YMILTQATSA-N	175.0398_337.0929	ESI neg	2.0845	70043221		20366341		36439740		67592393		69597187		43590433		80096039		53062859		17819177		20799287		27896173		25057204		0	0	18041064	8934327
2.33_191.14	4,4,7a-Trimethyl-3a,5,6,7-tetrahydro-3H-indene-1-carboxylic acid	[M+H-H2O]+	ACQRUPZAAPLQQP-UHFFFAOYSA-N	191.143	ESI pos	2.33	1522330		3481643		1686147		1207520		2600286		2172998		1636106		2494010		3070500		3127790		2479829		1738504		0	3139	507929	536137
1.67_339.11	4-O-p-Coumaroylquinic acid	[M+H]+	XWRHBGVVCOSNKO-OTCYKTEZSA-N	339.107	ESI pos	1.669	674874		609545		710710		553533		806373		586424		803502		694126		565582		569174		593338		801651		0	0	177065	179567
2.12_189.13	4-Hydroxy-4-[(E)-3-hydroxybut-1-enyl]-3,5,5-trimethylcyclohex-2-en-1-one	[M+H-2H2O]+	KPQMCAKZRXOZLB-AATRIKPKSA-N	189.127	ESI pos	2.121	1278366		1420150		1912608		1068752		1418070		1508740		1932895		1815790		1749577		1935473		1855412		1749102		202128	87395	541487	637676
0.63_347.10	4-Hydroxy-3-methoxyphenyl .beta.-D-glucopyranoside	[M+CHO2]-	KWVHACHAQJFTLZ-UJPOAAIJSA-N	347.098	ESI neg	0.63	37486		328834		834568		600462		440550		459035		552847		392248		905276		954618		925115		1103285		0	0	13399	3574
1.27_329.09	4-(Hexopyranosyloxy)-3-methoxybenzoic acid	[M-H]-	JYFOSWJYZIVJPO-UHFFFAOYSA-N	329.088	ESI neg	1.266	4185766		3309515		6056642		2833974		4457982		5398796		5698714		5446974		5082419		7149260		5122120		7787942		0	0	2463992	1247669
1.28_169.05	4-(Acetyloxy)-3-methoxybenzoic acid	[M+H-C2H2O]+	WTPDKEAYVAXNRO-UHFFFAOYSA-N	169.049	ESI pos	1.278	656690		487160		710974		443914		546706		618674		689432		674248		865710		1052657		765285		1043274		5319	3636	238744	359136
2.64_213.18_2.64_375.24	4-(4-Hydroxy-2,6,6-trimethylcyclohex-1-en-1-yl)butan-2-yl .beta.-D-glucopyranoside	[M+H-C6H10O5]+_[M+H]+	QOLJILMTPKQQQA-KWEBYEANSA-N	213.1848_375.2375	ESI pos	2.6425	1257213		777608		1262760		572217		774749		1182893		1157386		1112660		1111084		879186		941626		877973		16173	3476	275460	276293
2.64_211.17	4-(2,6,6-Trimethyl-4-oxocyclohex-2-en-1-yl)butan-2-yl 6-O-(3,4,5-trihydroxybenzoyl)hexopyranoside	[M+H-C13H14O9]+	CBGLETFGTARBGG-UHFFFAOYSA-N	211.169	ESI pos	2.638	1570196		1651775		1629428		576706		1303705		1202975		1887352		1611797		1373680		1824161		1032045		1553119		14153	32328	383062	430034
3.01_211.17	4-(2,6,6-Trimethyl-3-oxocyclohex-1-en-1-yl)butan-2-yl .beta.-D-glucopyranoside	[M+H-C6H10O5]+	MRTYYJWDYPABSE-CAOIYLRSSA-N	211.169	ESI pos	3.008	7004207		6547021		9925005		4994692		7763677		9243216		8853530		8935975		8427671		8445270		9754672		7965864		28917	39826	1993133	1965838
2.39_305.07	3,5,7,3',4'-Pentahydroxyflavanone	[M+H]+	CXQWRCVTCMQVQX-UHFFFAOYSA-N	305.065	ESI pos	2.386	410910		491851		861126		658185		496541		841495		653038		648889		467490		463624		477921		493288		1884	2305	182835	170194
2.00_225.08	3,5-Dimethoxy-4-hydroxycinnamic acid	[M+H]+	PCMORTLOPMLEFB-ONEGZZNKSA-N	225.076	ESI pos	2.005	469584		296996		445483		178042		342830		371828		299254		569435		504823		492927		449425		523925		59813	57985	150564	142206
1.69_167.07	3,4'-Dihydroxypropiophenone	[M+H]+	LTEPZFZSPZASKJ-UHFFFAOYSA-N	167.07	ESI pos	1.688	4042658		4029644		6937856		3598346		4788400		4850617		5367194		4942156		7659183		7637393		8814316		8379401		21632	18798	1336126	1413721
2.76_137.10	3,4,5-Trimethacarb	[M+H-C2H3NO]+	AUQAUAIUNJIIEP-UHFFFAOYSA-N	137.096	ESI pos	2.759	2320042		1895470		2966501		1340961		1856213		2551027		2463704		2193073		2571074		2385904		2436538		2442824		137970	110429	636663	668120
2.66_289.07	3,4,2',4',6'-Pentahydroxychalcone	[M+H]+	CRBYNQCDRNZCNX-DUXPYHPUSA-N	289.07	ESI pos	2.659	593890		499970		895562		275069		539914		670358		893181		614167		517156		639683		522046		684658		0	0	157320	176020
1.94_161.06	3,4-Methylenedioxy-.alpha.-pyrrolidinobutyrophenone	[M+H-C5H11NO]+	OLVLMDVPMCIBQW-UHFFFAOYSA-N	161.06	ESI pos	1.938	8444640		3910226		6421568		6030592		9098536		6778024		13880748		6341682		2593606		3240484		3670228		3637139		23997	9791	2317741	2288032
0.27_110.06	3-Pyridinemethanol	[M+H]+	MVQVNTPHUGQQHK-UHFFFAOYSA-N	110.06	ESI pos	0.265	125402008		67998136		166040080		77728856		102445992		115473752		148026672		152782960		178219696		213028496		155995184		191300224		44754	138634	32080280	34096012
1.68_337.09	3-O-Coumaroylquinic acid	[M-H]-	BMRSEYFENKXDIS-QHAYPTCMSA-N	337.093	ESI neg	1.681	1933234		1803249		263381		192224		232572		2189472		2548542		2166260		1818460		2000667		2106062		3127270		0	0	1013176	403328
2.18_427.18_2.24_381.18_2.24_427.18	3-Methylbutyl 6-O-.alpha.-L-arabinopyranosyl-.beta.-D-glucopyranoside	[M+CHO2]-_[M-H]-_[M+CHO2]-	IJPILWLAYQFNOD-UQSUZELCSA-N	427.182_381.1767_427.1821	ESI neg	2.21967	3574460		3331340		4379501		1834632		4144441		4395183		4473200		4501186		4633120		5564716		5273243		5386647		0	0	2160040	896398
2.00_179.07	3-Methoxycinnamic acid	[M+H]+	LZPNXAULYJPXEH-AATRIKPKSA-N	179.07	ESI pos	2.002	194807		169316		192398		117470		232901		165545		313219		199864		141786		175174		181792		174793		19204	39662	39537	48934
1.35_141.05	3-Hydroxy-5-methoxy-3-methyl-5-oxopentanoic acid	[M+H-2H2O]+	UNHGPASVFNKZNR-UHFFFAOYSA-N	141.055	ESI pos	1.355	779120		335116		763404		405113		538840		555440		809500		612544		413531		504931		649113		621929		45793	28231	198090	222914
5.42_520.34	3-Hydroxy-2-((9Z,12Z)-octadeca-9,12-dienoyloxy)propyl 2-(trimethylazaniumyl)ethyl phosphate	[M+H]+	LSUXCWJOIAWGOU-UTJQPWESSA-N	520.34	ESI pos	5.423	755727		913250		1393240		1649894		2628223		1132832		787265		586205		1613856		1700344		1687739		1755290		0	0	251334	236145
1.88_171.10	3-Cyclohexyl-3-oxopropanoic acid ethyl ester	[M+H-C2H4]+	ASYASKBLHYSMEG-UHFFFAOYSA-N	171.102	ESI pos	1.882	385993		520284		789649		378110		574560		591103		701267		609649		963287		1186641		1130218		1115561		133390	101616	231571	229101
2.22_431.19_2.27_431.19	3-Buten-2-one, 4-[4-(.beta.-D-glucopyranosyloxy)-2-hydroxy-2,6,6-trimethylcyclohexylidene]-	[M+CHO2]-_[M+CHO2]-	OSUSRWMGHUUXBY-OHWUEDFNSA-N	431.1922_431.1921	ESI neg	2.2475	1966147		1894722		2024375		603809		1035666		1569444		1815206		1614976		1231754		1563133		1183115		1827336		0	0	659285	307950
2.90_365.20	3-[2-(6,7-Dihydroxy-1,2,4a-trimethylspiro[3,4,6,7,8,8a-hexahydro-2H-naphthalene-5,2'-oxirane]-1-yl)ethyl]-2-hydroxy-2H-furan-5-one	[M-H]-	QMWJARHMJRTJMQ-UHFFFAOYSA-N	365.197	ESI neg	2.898	1020556		764668		1576758		642346		1349894		1105001		1448289		1378391		1711735		2245098		1959581		2260498		0	0	553434	219641
1.70_327.11	3-(4-Hydroxyphenyl)-3-oxopropyl .beta.-D-glucopyranoside	[M-H]-	NPAQHLFPEOMKAL-UXXRCYHCSA-N	327.108	ESI neg	1.697	2030162		2082690		2986372		2210317		2734756		2473124		2695884		2454116		3535265		3794369		4442322		4067815		0	0	1631734	926947
1.83_376.16	3-(3-(.beta.-D-Glucopyranosyloxy)-2-methoxyphenyl)propanoic acid	[M+H]+		376.16	ESI pos	1.833	1307830		1322428		1917737		1116255		1204974		1353813		1682094		1464581		1672122		1741168		1650626		1472856		0	0	720780	659110
1.86_357.12	3-(2-(.beta.-D-Glucopyranosyloxy)-4-methoxyphenyl)propanoic acid	[M-H]-	LIVNOUBJFOXZOR-YMILTQATSA-N	357.119	ESI neg	1.865	1550096		1478575		1885598		1414731		1796782		2082110		1888652		2107701		1657494		2146845		1810468		2161441		0	0	1394641	916351
1.77_343.10	3-(2-(.beta.-D-Glucopyranosyloxy)-3-hydroxyphenyl)propanoic acid	[M-H]-	APQFDHZCDLNMLA-APACUCGBSA-N	343.103	ESI neg	1.769	2598182		2112809		3206710		1805157		2655596		3093588		2999864		2252300		2346236		3126624		2940676		3278313		0	0	1355730	669061
2.13_209.15	2(5H)-Furanone, 5-(7-hydroxy-6-methyloctyl)-	[M+H-H2O]+	AEPMKZIOUKHDOO-UHFFFAOYSA-N	209.154	ESI pos	2.134	6771023		5147870		8213912		4780176		7273372		9809943		14845122		9560267		5865698		5719838		6926613		4563845		13712	39851	2102534	2188004
2.20_434.20	2-Phenylethyl 6-O-pentopyranosylhexopyranoside	[M+H+NH3]+	ZRGXCWYRIBRSQA-UHFFFAOYSA-N	434.202	ESI pos	2.2	949050		622570		1038455		734540		832682		878854		1789961		691269		625262		802114		610002		591810		0	0	228360	261199
2.33_461.17	2-Phenylethyl 6-O-((2S,3R,4R)-3,4-dihydroxy-4-(hydroxymethyl)tetrahydrofuran-2-yl)-.beta.-D-glucopyranoside	[M+CHO2]-	GZSQKOFXMZDKPV-DERWZFJFSA-N	461.167	ESI neg	2.329	2709470		2693209		3756125		2155890		2573131		3189747		5090914		2376666		2099679		3285199		2639864		3210434		0	0	1358780	659602
2.20_461.17	2-Phenylethyl 2-O-.beta.-D-xylopyranosyl-.beta.-D-glucopyranoside	[M+CHO2]-	CGZNTHDUAFIKOH-BMVMOQKNSA-N	461.167	ESI neg	2.196	1395304		885610		1560931		960708		1296914		1722948		2750816		1199341		677058		1326859		916339		981123		0	0	525039	251118
1.93_325.09	2-O-Hexopyranosyl-6-O-((2E)-3-(4-hydroxyphenyl)prop-2-enoyl)hexopyranose	[M-H-C6H10O5]-	ZPHQZULZLQMWGY-ZZXKWVIFSA-N	325.093	ESI neg	1.933	691630		758115		779805		1192456		1223727		868375		1361342		1122181		445422		439385		1066200		822273		0	0	539709	289444
2.01_145.06	2-Methylcinnamic acid	[M+H-H2O]+	RSWBWHPZXKLUEX-VOTSOKGWSA-N	145.065	ESI pos	2.007	2235836		1145172		1740902		1273075		1623624		1568661		3149721		1371806		631620		835420		808490		869692		2225	2242	474959	512501
2.09_427.18	2-Methylbutyl 6-O-pentofuranosylhexopyranoside	[M+CHO2]-	QGZWEFZSPCYRKL-UHFFFAOYSA-N	427.182	ESI neg	2.088	890999		674038		880413		287950		871653		998197		1187756		792307		567818		861269		571979		689365		0	0	398375	227394
0.25_237.06	2-Keto-3-deoxyoctonic acid	[M-H]-	NNLZBVFSCVTSLA-UHFFFAOYSA-N	237.062	ESI neg	0.251	8008690		4617772		8910787		1939762		7413562		11185409		10498232		9537617		4719021		6167166		7200849		6331642		0	0	3405367	1404266
0.24_291.12	2-Cyclopentene-1-octanoic acid, 5-(2-carboxyethyl)-.epsilon.,4-dioxo-, (1S,5R)-	[M-H-H2O]-	HYPIFMOQVFWSBF-WCQYABFASA-N	291.12	ESI neg	0.244	140729		428603		465114		94489		3379084		15154144		3839502		12632824		0		0		0		0		0	0	1340232	746918
2.11_431.19	2-Cyclohexen-1-one, 4-[(1E)-3-(.beta.-D-glucopyranosyloxy)-1-buten-1-yl]-4-hydroxy-3,5,5-trimethyl-, (4S)-	[M+CHO2]-	SWYRVCGNMNAFEK-CLCVOTHJSA-N	431.192	ESI neg	2.11	23421370		26805014		30461666		20888334		26110050		30376192		31653820		34854680		25451674		23615460		30324114		22179520		0	3937	15815418	8061038
2.49_265.14	2-cis-4-trans-Abscisic acid	[M+H]+	JLIDBLDQVAYHNE-YKALOCIXSA-N	265.143	ESI pos	2.486	1150034		828113		1189979		686330		1063791		1486603		1125691		1204624		1263636		877026		959355		897777		8864	2346	264578	283197
2.66_133.10	2-Adamantanone	[M+H-H2O]+	IYKFYARMMIESOX-UHFFFAOYSA-N	133.101	ESI pos	2.659	945888		845370		1131506		495230		869238		995701		1033866		949889		1137668		1168116		1128844		1048648		25578	10111	253372	269341
1.40_107.05	2-(4-t-butylphenoxy)cyclohexanol	[M+H-C9H18O]+	FTIXUILRMBSXNS-UHFFFAOYSA-N	107.049	ESI pos	1.397	1595120		1619334		3185544		1204675		1339105		1976610		2310230		1901742		2683867		2197345		2195147		3471036		20349	15192	700628	990943
1.70_121.03	2-(4-Methylphenyl)-2,3-dihydro-4H-chromen-4-one	[M+H-C9H10]+	HITISLKGAFZTFZ-INIZCTEOSA-N	121.028	ESI pos	1.703	575342		567482		977925		497532		685036		723149		775366		724111		1085028		1096645		1323103		1210835		3591	4692	189563	212143
1.80_336.11	2-(4-Hydroxyphenyl)ethyl 6-O-((2-oxo-2,3-dihydro-1H-indol-3-yl)acetyl)-.beta.-D-glucopyranoside	[M+H-C8H10O2]+	YOTVUKXKJYRTAR-NAJYVHOLSA-N	336.108	ESI pos	1.801	949286		396026		796800		444423		828258		988165		1525224		832028		338824		553867		553892		580933		0	0	204094	166806
6.38_271.23	16-Hydroxyhexadecanoic acid	[M-H]-	UGAGPNKCDRTDHP-UHFFFAOYSA-N	271.228	ESI neg	6.376	1160767		891098		1342101		725492		2969030		2891750		3248525		1467280		4136058		4646338		4949786		6003096		201499	178442	1210638	645508
5.45_277.22	13S-Hydroxy-9Z,11E,15Z-octadecatrienoic acid	[M+H-H2O]+	KLLGGGQNRTVBSU-FQSPHKRJSA-N	277.216	ESI pos	5.45	321136		401582		796736		488877		645719		793942		480467		404796		362346		736045		629895		548780		2739	1904	92394	92573
5.52_293.21	13S-Hydroperoxy-9Z,11E-octadecadienoic acid	[M-H-H2O]-	JDSRHVWSAMTSSN-PIHGWCCBSA-N	293.212	ESI neg	5.519	764208		469182		1544438		426164		1087663		1323138		1298148		1386046		953934		1601624		1423154		1529969		0	0	256010	93079
5.53_295.23	13-Keto-9Z,11E-octadecadienoic acid	[M+H]+	JHXAZBBVQSRKJR-BSZOFBHHSA-N	295.226	ESI pos	5.525	1900188		1047081		3818158		1036484		2641309		3243340		2932048		3052584		2513957		3768655		3373352		3869232		14877	10907	367116	354508
4.54_293.21	13-Hydroperoxy-9Z,11E-octadecadienoic acid	[M-H-H2O]-	JDSRHVWSAMTSSN-BSZOFBHHSA-N	293.212	ESI neg	4.536	387995		197714		880649		276864		567049		887392		826122		782394		579341		844698		839280		821260		0	0	138881	48590
4.74_313.24	12,13-Dihydroxy-9Z-octadecenoic acid	[M-H]-	CQSLTKIXAJTQGA-GJGKEFFFSA-N	313.238	ESI neg	4.739	821572		667137		1857344		733360		1536662		1674016		1808181		1849410		2029804		2779975		2383105		2747290		9730	20906	442291	181745
2.76_133.10	10-Hydroxy-2-decenoic acid	[M+H-3H2O]+	QHBZHVUGQROELI-SOFGYWHQSA-N	133.101	ESI pos	2.76	3024124		2367044		3795370		1657733		2354076		3250474		3118970		2829990		3337433		2983650		3026716		2968681		16195	11080	679209	700950
3.76_167.14	10-Hendecenoic acid	[M+H-H2O]+	FRPZMMHWLSIFAZ-UHFFFAOYSA-N	167.143	ESI pos	3.761	366787		236684		832745		369269		653724		913499		817060		748716		721839		830208		967302		1029185		100692	91893	183722	202929
1.68_483.08	1,6-Bis-O-(3,4,5-trihydroxybenzoyl)hexopyranose	[M-H]-		483.078	ESI neg	1.682	3559742		3084977		3911987		2887070		4732658		4270554		4628175		4304331		4209718		5903738		5621747		6109562		0	1787	2263975	1132588
0.26_145.05_0.26_163.06	1,6-Anhydro-.beta.-D-glucose	[M+H-H2O]+_[M+H]+	TWNIBLMWSKIRAT-VFUOTHLCSA-N	145.0495_163.06	ESI pos	0.26	5484181		3031552		10990102		8114488		5738427		5105121		4815145		5069301		3708337		3521973		3213295		3326900		263883	137518	2030768	2244495
0.47_86.10	1,5-Pentanediamine	[M+H-NH3]+	VHRGRCVQAFMJIZ-UHFFFAOYSA-N	86.0965	ESI pos	0.47	8855415		3031645		7285022		2166719		5269221		3054148		5056804		3744502		3904570		3357481		3711804		6840322		55021	0	1968872	2690017
1.93_159.04	1,5-Dihydroxynaphthalene	[M-H]-	BOKGTLAJQHTOKE-UHFFFAOYSA-N	159.045	ESI neg	1.925	1891779		846284		1302713		1319596		1914451		1257791		2590332		1319672		465521		560856		771653		617385		0	0	738444	395865
2.06_635.09_2.05_317.04	1,3,6-Tri-O-galloyl-.beta.-D-glucose	[M-H]-_[M-2H]2-	RNKMOGIPOMVCHO-SJMVAQJGSA-N	635.0894_317.0408	ESI neg	2.057	4256162		4035568		4733458		4685008		5901772		4390921		5706180		5144991		7012561		7101563		8090357		7267175		38044	53232	3725199	2148200
2.06_654.13	1,2,6-Trigalloylglucose	[M+NH4]+	LLENXGNWVNSBQG-VFTFQOQOSA-N	654.13	ESI pos	2.064	237346		328698		260592		369987		323167		246855		268437		291906		521086		339735		424720		392821		0	2185	286511	308660
2.26_393.05	1,2,4,6-Tetragalloylglucose	[M-2H]2-	YXZYFHXWEOAXLF-UGAZNADUSA-N	393.046	ESI neg	2.256	14877490		11344924		14324308		10118672		19742434		16665518		15327738		21783634		18186160		17307376		20630586		20042084		92521	119275	7746530	2902096
2.39_939.11_2.39_469.05	1,2,3,4,6-Pentagalloyl .beta.-D-glucose	[M-H]-_[M-2H]2-	QJYNZEYHSMRWBK-NIKIMHBISA-N	939.1116_469.0514	ESI neg	2.3895	9866227		5449871		10488634		9004162		22010734		13617383		13523854		20934814		20640576		15778978		17498407		20841878		54079	51565	6818869	2289323
0.52_160.08	1,2,3,4-Tetrahydro-6-quinolinecarboxylic acid	[M+H-H2O]+	ARNALYPZOYPNAF-UHFFFAOYSA-N	160.076	ESI pos	0.518	52172476		50488180		48903720		24913006		26547156		39354964		54634344		46412168		52368328		63623660		65769804		61964320		0	0	22888388	28141444
2.25_787.10	1,2,3,4-Tetragalloylglucose	[M-H]-	XFLTYUCKJRFDOU-XPMKZLBQSA-N	787.101	ESI neg	2.254	4043551		2813716		4514708		2780248		6846606		5314827		5305980		7525900		5611508		6813302		7623594		7896365		0	10127	2089042	781980
2.77_109.10	1,2,3,3-Tetramethylbicyclo[2.2.1]heptan-2-ol	[M+H-C3H8O]+	AJVKAPQCJKEUSG-UHFFFAOYSA-N	109.101	ESI pos	2.774	7338758		6353612		9157940		4161164		6054259		7090084		8484700		7339158		6228610		5609086		5586447		5983134		190139	220504	1860019	1772580
2.26_619.09	1,2,3-Tris-O-(3,4,5-trihydroxybenzoyl)-.beta.-D-glucopyranose	[M+H-H2O]+	MACFXELYCBWKGT-VFTFQOQOSA-N	619.093	ESI pos	2.262	2419534		1721355		2546395		1600385		3739482		2811924		2805463		3614824		3534644		3408556		3577513		3765144		0	2292	805592	948856
8.57_634.54	1,2-Dilinoleoylglycerol	[M+NH4]+	MQGBAQLIFKSMEM-MAZCIEHSSA-N	634.54	ESI pos	8.575	165542		98990		144549		235028		700334		279182		86526		29796		162780		102203		220073		79519		0	0	73980	83604
6.21_482.32	1-Stearoyl-2-hydroxy-sn-glycero-3-phosphoethanolamine	[M+H]+	BBYWOYAFBUOUFP-JOCHJYFZSA-N	482.324	ESI pos	6.207	38867		29252		36710		41678		141151		54904		46427		26651		117409		95953		148242		116939		0	0	44093	48052
6.23_524.37	1-Stearoyl-2-hydroxy-sn-glycero-3-phosphocholine	[M+H]+	IHNKQIMGVNPMTC-RUZDIDTESA-N	524.371	ESI pos	6.23	167224		134301		187949		137915		641611		306163		210925		158445		499378		487857		687644		617378		0	0	147642	158300
5.65_496.34	1-Palmitoyl-sn-glycero-3-phosphocholine	[M+H]+	ASWBNKHCZGQVJV-HSZRJFAPSA-N	496.339	ESI pos	5.65	666882		554245		1231069		1074330		2363238		1249206		1046805		783978		2209907		2537900		3007192		3663228		9660	9585	380323	358785
5.63_454.29	1-Palmitoyl-2-hydroxy-sn-glycero-3-phosphoethanolamine	[M+H]+	YVYMBNSKXOXSKW-HXUWFJFHSA-N	454.293	ESI pos	5.626	259230		205966		397431		537237		968670		479879		367124		241584		749545		854984		1100059		1024532		0	2307	169439	151105
5.79_522.36	1-Oleoyl-sn-glycero-3-phosphocholine	[M+H]+	YAMUFBLWGFFICM-PTGWMXDISA-N	522.355	ESI pos	5.785	119274		97881		239369		168036		395650		163284		118973		109167		293097		334644		368397		515704		0	0	69499	68624
2.64_241.11	1-O-((2E,4E)-9-Carboxy-8-hydroxy-2,7-dimethylnona-2,4-dienoyl)-.beta.-D-glucopyranose	[M-H-C6H10O5]-	JWAGJGCOOSEMAU-CGSVZCSKSA-N	241.108	ESI neg	2.64	362948		687510		615340		297760		732048		674760		558788		396832		552773		842224		606516		883708		29213	12710	220013	102535
1.74_489.20	1-O-((2E,4E)-5-((1R,3S,5S,8S)-3,8-Dihydroxy-1,5-dimethyl-6-oxabicyclo[3.2.1]octan-8-yl)-3-methylpenta-2,4-dienoyl)-.beta.-D-glucopyranose	[M+CHO2]-		489.198	ESI neg	1.742	12899763		10047231		13381418		10578672		13746039		13257470		13598596		14077576		14877100		12105835		13674211		13950580		5043	0	8043374	4968954
6.32_355.28	1-Monolinoleoyl-rac-glycerol	[M+H]+	WECGLUPZRHILCT-HZJYTTRNSA-N	355.284	ESI pos	6.32	315535		339425		512353		342056		537796		633681		270977		146936		224303		316078		365580		203293		3077	5880	74992	77832
5.42_564.33	1-Linoleoyl-sn-glycero-3-phosphorylcholine	[M+CHO2]-	SPJFYYJXNPEZDW-UTJQPWESSA-N	564.331	ESI neg	5.419	427021		480360		1002183		987460		1735090		799667		554368		407760		909811		1094113		1054139		1198477		0	1893	309418	116972
5.94_510.36	1-Heptadecanoyl-sn-glycero-3-phosphocholine	[M+H]+	SRRQPVVYXBTRQK-XMMPIXPASA-N	510.356	ESI pos	5.941	83671		81016		127093		34920		311590		194639		142210		139007		465961		471836		575181		619674		0	0	80113	71461
2.16_151.08	1-(4-Hydroxyphenyl)propane-1,2-diol	[M+H-H2O]+	PIYCCGIPUXJHIW-UHFFFAOYSA-N	151.075	ESI pos	2.16	462531		653978		671416		387266		585099		658518		596173		607052		1271454		977041		1122507		1202082		99958	74974	313980	321077
0.26_113.07	1-(2-Hydroxyethyl)pyrazole	[M+H]+	DXFBKDSQMUFYLD-UHFFFAOYSA-N	113.071	ESI pos	0.262	2322110		1357005		2893674		1097619		1588480		1626847		2208828		2321311		2167333		2926279		2456798		2929154		159882	4366	818727	870976
5.65_277.22	(Z)-9,12,13-Trihydroxyoctadec-15-enoic acid	[M+H-3H2O]+	DNWUYCUUEGGVPR-CLTKARDFSA-N	277.216	ESI pos	5.654	362605		263237		705462		197423		541924		667472		656575		615665		493536		702613		657845		811949		0	0	72322	80677
0.24_146.05	(S)-2-Ureidopentanedioic acid	[M-H-CHNO]-	LCQLHJZYVOQKHU-VKHMYHEASA-N	146.046	ESI neg	0.244	6671250		3732050		6720879		11977608		13156492		6628282		3982243		817805		2382124		1736796		2166170		1016060		183983	121556	2055313	1093530
2.48_253.14_2.48_289.16	(E)-3,10-Dihydroxy-4,9-dimethyldodec-6-enedioic acid	[M+H-2H2O]+_[M+H]+	FIDISSFBBFUTOK-ONEGZZNKSA-N	253.1433_289.1644	ESI pos	2.483	1499280		1690008		2320768		1158088		2141066		2031424		1857087		2073853		2789638		3530845		3099538		3721459		96059	48005	525321	566168
3.01_175.15_3.01_193.16	(E)-.alpha.-Ionone	[M+H-H2O]+_[M+H]+	UZFLPKAIBPNNCA-BQYQJAHWSA-N	175.1481_193.1587	ESI pos	3.0075	1808839		1566071		2473424		1241955		1850370		2235636		2274784		2223830		2059556		2113211		2411576		1857372		1911	5350	499238	504103
3.76_329.23	(9Z)-5,8,11-Trihydroxyoctadec-9-enoic acid	[M-H]-	FITAKYVPWCVTII-QBFSEMIESA-N	329.233	ESI neg	3.759	36754120		24273752		99489712		39291932		71864384		103282544		100942632		92960400		72662128		105007896		101126696		112068320		32154	54284	20460760	7496259
4.49_311.22	(9Z,12E)-15,16-Dihydroxyoctadeca-9,12-dienoic acid	[M-H]-	LKLLJYJTYPVCID-JVVXYUKTSA-N	311.223	ESI neg	4.486	287725		326013		608009		269780		570240		713964		490940		421954		682735		1177295		1110195		727697		6253	3372	200764	82958
5.40_279.23	(9E,11Z)-8-Hydroxyoctadeca-9,11-dienoic acid	[M+H-H2O]+	NTYHQKJCCYNCMG-LMEHAKNHSA-N	279.232	ESI pos	5.396	311946		209108		871101		445103		761375		864953		822241		878819		786690		1392284		1029637		905551		8991	9522	89545	113775
2.61_151.11	(5S)-5-(1-Hydroxy-1-methylethyl)-2-methyl-2-cyclohexen-1-one	[M+H-H2O]+	DJOOMNLGIUGRKD-QMMMGPOBSA-N	151.112	ESI pos	2.607	482234		534763		679203		365057		484120		515872		563013		484028		915934		723171		828242		928618		75054	69019	201284	204812
2.49_547.24	(4Z)-4-(2,6,6-Trimethyl-4-oxocyclohex-2-en-1-ylidene)butan-2-yl 6-O-.beta.-D-xylopyranosyl-.beta.-D-glucopyranoside	[M+CHO2]-	RHMAUENMPZLXOX-OPCZWOBISA-N	547.24	ESI neg	2.489	439397		383846		697533		141005		423273		392643		526411		666926		585189		927308		473313		515086		0	0	218157	75245
2.61_405.18	(4E)-8-(.beta.-D-Glucopyranosyloxy)-2,7-dimethyldec-4-enedioic acid	[M-H]-	QPCDZZMPXNUVCK-CJXBJLFHSA-N	405.177	ESI neg	2.611	762948		931134		1687156		816433		1011152		1247495		1140135		1073406		1389945		1530796		1530410		1836213		0	0	523682	218163
1.42_332.13	(4-(.beta.-D-Glucopyranosyloxy)phenyl)acetic acid	[M+NH4]+	YHJWCNZGHBFVTB-RGCYKPLRSA-N	332.134	ESI pos	1.418	4371756		2229671		4555274		2764094		3051882		3871008		4721272		4502774		4222004		4622536		4955804		4489598		0	0	1158251	1453600
1.88_451.22	(3E)-4-(1,2,4-Trihydroxy-2,6,6-trimethylcyclohexyl)but-3-en-2-yl hexopyranoside	[M+CHO2]-	XZRJEYQBLXDNNU-AATRIKPKSA-N	451.219	ESI neg	1.88	6747467		8073135		12028820		5355138		7996952		10508609		10924954		13003544		11731944		12461564		13246622		9289701		0	0	5218895	2475783
2.83_207.14	(3E)-4-(1-Hydroxy-2,6,6-trimethyl-4-oxocyclohex-2-en-1-yl)but-3-en-2-yl 2-O-hexopyranosylhexopyranoside	[M+H-C12H22O11]+	IVORNVLYHQXABJ-AATRIKPKSA-N	207.138	ESI pos	2.826	613128		784137		835086		410480		816515		1036509		1028126		1130443		853626		837181		848499		926828		23118	21935	212552	255573
2.13_387.20	(3E)-4-(1-Hydroxy-2,2,6-trimethyl-4-oxocyclohexyl)but-3-en-2-yl .beta.-D-glucopyranoside	[M-H]-	QFTPTUOKFIIFJH-DXWZCJOSSA-N	387.202	ESI neg	2.131	608546		485885		625810		471694		692077		770575		1173904		847801		416969		474477		551113		297748		0	0	376007	194571
2.11_161.13	(2R)-2-(4-Isobutylphenyl)-N-mesylpropionamide	[M+H-C2H5NO3S]+	KQDRVXQXKZXMHP-LLVKDONJSA-N	161.132	ESI pos	2.114	619901		674510		958874		527856		593912		787771		888184		1006193		748154		681973		862282		617259		0	0	202457	238969
2.77_151.15	(2E)-3,4,7-Trimethylocta-2,6-dien-1-ol	[M+H-H2O]+	ZPIKDJYPRJOHLN-YRNVUSSQSA-N	151.148	ESI pos	2.774	1237890		1107808		1506814		697634		1035457		1215117		1470568		1184213		1031447		910088		942565		1022337		1947	3604	296338	280929
2.11_149.10	(2E,5E)-3,5,7-Trimethylocta-2,5-dienedioic acid	[M+H-CH4O3]+	WLVNOJMYBIEIPJ-KQQUZDAGSA-N	149.096	ESI pos	2.113	1293265		1342176		1948106		1107788		1353020		1812867		2376880		2021805		1489656		1358537		1711607		1248264		17704	11776	451346	511360
4.04_329.23	(12Z)-9,10,11-Trihydroxyoctadec-12-enoic acid	[M-H]-	JHGVFGJXFVIYSM-XFXZXTDPSA-N	329.233	ESI neg	4.044	747344		703307		1124676		333547		1334347		960733		1005114		1003797		800685		1433625		1150316		1238304		2623	4743	0	93163
3.56_275.20	(12Z,15Z)-9,10,11-Trihydroxyoctadeca-12,15-dienoic acid	[M+H-3H2O]+	KFINXCASWPGHEW-UYOLCUGSSA-N	275.2	ESI pos	3.562	219154		148581		932156		382630		653811		865780		979066		643948		1009569		1350515		1327276		1330276		3068	6343	118425	114244
3.56_327.22	(10E,15Z)-9,12,13-Trihydroxyoctadeca-10,15-dienoic acid	[M-H]-	MKYUCBXUUSZMQB-MKZMYESJSA-N	327.218	ESI neg	3.56	3922310		2304211		14459539		6236442		10556882		14904863		16368987		11138298		15473044		21718546		22419132		21972770		0	1786	3247562	1149630
1.66_335.08	(+)-Catechin	[M+CHO2]-	PFTAWBLQPZVEMU-DZGCQCFKSA-N	335.077	ESI neg	1.664	4836836		3692968		5696056		3494978		4151250		5489159		4888260		4359554		5091344		5205202		5247133		5255061		0	0	1958886	881389
3.05_247.13	(+)-Abscisic acid	[M+H-H2O]+	JLIDBLDQVAYHNE-LXGGSRJLSA-N	247.133	ESI pos	3.052	410801		841075		913664		1314794		1220888		2085163		910979		1428653		3125724		2255491		3103508		1412140		0	0	220180	228377
2.11_135.12	((1R,4S,5R,8S,9R)-4-Isopropyl-6,8,9-trimethyl-3-oxabicyclo[3.3.1]non-6-en-1-yl)methanol	[M+H-C5H12O2]+	BNAPJYMSXNSYQF-HLTWPCROSA-N	135.117	ESI pos	2.114	761043		913041		1208314		675591		773884		976157		1214762		1232939		978927		856940		1121325		813118		19446	11223	287283	304309
2.77_149.13	(-)-Globulol	[M+H-C4H10O]+	AYXPYQRXGNDJFU-QTPLKFIXSA-N	149.132	ESI pos	2.773	810259		658421		949493		428677		569895		733192		836111		720129		694389		567906		667058		661126		8332	2421	187648	180399
2.31_443.10	(-)-Catechin gallate	[M+H]+	LSHVYAFMTMFKBA-CTNGQTDRSA-N	443.097	ESI pos	2.306	511742		488425		574981		406256		624612		641434		719053		530676		511188		605092		612626		624950		0	0	129184	153361
1.64_579.15	(-)-Catechin	[2M-H]-	PFTAWBLQPZVEMU-HIFRSBDPSA-N	579.151	ESI neg	1.64	4827568		2523260		7085876		2490461		3777508		7058277		5041304		3910970		5985182		6410650		5054592		6499335		0	0	795611	134133
0.27_360.15	.alpha.,.beta.-Trehalose	[M+NH4]+	HDTRYLNUVZCQOY-BTLHAWITSA-N	360.15	ESI pos	0.265	28912134		19585770		31799920		50997004		30486972		21560132		21023752		7361752		13455505		8512889		9959266		6162555		1414735	231198	11594628	10611622
2.77_107.09	.alpha.,.beta.-Thujone	[M+H-C2H6O]+	USMNOWBWPHYOEA-VWHDNNRLSA-N	107.085	ESI pos	2.772	1285748		1137998		1597396		786164		1140129		1328249		1474374		1264253		1165706		1133694		1125727		1181084		80515	77956	372964	359591
3.22_135.12	.alpha.-Pinene oxide	[M+H-H2O]+	NQFUSWIGRKFAHK-UHFFFAOYSA-N	135.117	ESI pos	3.219	1086450		1780538		1056662		676519		1277956		772822		1653488		934442		1753804		2092149		1624786		1861976		21140	22247	410384	442646
0.25_148.06	.alpha.-Guanidinoglutaric acid	[M+H-CH2N2]+	RHVVRMJOHATSPD-VKHMYHEASA-N	148.06	ESI pos	0.246	12055161		6849118		14253622		24092924		23483974		9822573		9078039		1373445		4422776		2667604		3401344		1690811		139988	129113	2259302	2397662
4.78_311.22		[M-H]-		311.223	ESI neg	4.781	1009187		813227		1895664		609667		1647300		1641604		1817551		1872929		1272078		2178577		1713427		2124756		4320	9268	337650	121883
1.37_483.08		[M-H]-		483.078	ESI neg	1.374	1544806		941198		623705		620873		910183		1639662		1629839		2009601		1223896		1875557		1664760		2389501		0	0	751789	395772
0.24_110.90		[M-H]-		110.899	ESI neg	0.239	272987		219556		221043		338058		222527		242668		267956		339147		130458		111465		170904		195119		42300	14660	109316	99955
0.24_108.90		[M-H]-		108.902	ESI neg	0.24	479972		276995		405535		584208		387276		421807		423115		552023		155115		186014		282708		303369		71109	45505	179003	148485
0.21_116.99		[M-H]-		116.986	ESI neg	0.208	200070		155799		245010		120145		205999		200178		243017		215368		203778		265282		226631		207113		0	6427	115465	63653
0.21_114.99		[M-H]-		114.989	ESI neg	0.208	1527541		1233925		1704638		851474		1387206		1474280		1780944		1579596		1463441		1813962		1785834		1705912		105507	111488	941966	519256
0.23_120.93		[M-H]-		120.928	ESI neg	0.235	262826		351464		382951		313944		262850		296750		312904		392343		221295		355973		299146		337481		9278	6245	243535	171542
0.23_118.93		[M-H]-		118.931	ESI neg	0.235	928511		1110608		1277680		996754		890807		1026951		1009582		1316895		777830		1199199		1071266		1205389		72418	27351	820610	558090
0.23_130.96		[M-H]-		130.958	ESI neg	0.229	680879		1071286		1010307		757981		777668		594188		728127		910657		833824		1111072		1010630		1036783		29726	32846	659932	342630
0.23_128.96		[M-H]-		128.96	ESI neg	0.227	8107208		12252161		11542660		9096154		8984403		6621048		8029346		10982919		9747340		13978235		12045232		12527070		267858	105330	7739734	3895286
0.21_132.98		[M-H]-		132.981	ESI neg	0.209	458119		468087		521304		270236		510663		471582		560453		521242		488076		555516		579446		506591		16344	21780	309669	188871
0.21_130.98		[M-H]-		130.984	ESI neg	0.208	3120767		3073081		3927146		1925656		3333358		3424044		3823528		3331161		3244959		4081543		4082351		3582224		217179	236830	2235633	1275672
8.29_136.86		[M-H]-		136.863	ESI neg	8.293	319394		462775		318999		365046		567576		603960		417603		513674		803954		577647		548334		634761		363978	304892	311145	353629
8.29_134.87		[M-H]-		134.865	ESI neg	8.294	886277		1342950		920911		1041522		1702711		1827252		1177174		1482150		2625930		1752550		1676796		1940823		1046955	874543	850096	1030393
8.15_136.86		[M-H]-		136.863	ESI neg	8.154	692830		686118		522226		587167		1399098		1050840		663846		628771		1231481		945291		943080		812585		475163	322424	586378	488643
8.15_134.87		[M-H]-		134.865	ESI neg	8.154	2013824		2084278		1529164		1717451		4564550		3391109		1961638		1894199		4104838		3019998		3026716		2516256		1416946	891757	1755410	1384711
0.20_150.95		[M-H]-		150.947	ESI neg	0.202	735192		769152		663295		645549		723125		705026		714428		791317		671554		813061		780103		656205		158668	163162	703275	601421
0.20_148.95		[M-H]-		148.95	ESI neg	0.203	1599776		1719708		1558050		1458866		1643454		1710753		1519570		1732476		1499734		1829901		1699942		1605913		375390	353175	1599946	1335968
0.21_160.98		[M-H]-		160.976	ESI neg	0.209	5049607		4854875		6418147		3095901		5548562		5574235		6427068		5603570		5262996		6424288		6383256		5798352		371275	363450	3524454	1999599
0.21_158.98		[M-H]-		158.978	ESI neg	0.209	32218016		30515982		39374304		19679968		33507750		34273220		39977164		34690480		32608160		40691860		39995996		36592444		2392088	2376312	22019788	12775299
0.29_175.02		[M-H]-		175.025	ESI neg	0.293	65101		130076		190841		76428		182345		206538		199849		223562		161919		199976		185351		208050		9987	5710	39168	16611
0.26_218.07		[M-H]-		218.067	ESI neg	0.262	103573		136417		142980		112005		141108		152749		177089		210319		198144		210456		178908		312922		0	0	69621	29757
0.26_216.05		[M-H]-		216.052	ESI neg	0.261	72061		120012		185517		18731		170033		124162		122697		352666		416985		484836		380865		675976		0	0	144761	65831
0.25_217.03		[M-H]-		217.03	ESI neg	0.246	10739314		4947944		34602800		7543984		11496310		16699203		14159247		18941440		8407078		7230520		7629692		10270078		81139	18500	4054237	2219876
0.25_219.05		[M-H]-		219.045	ESI neg	0.252	1226549		690219		1644473		623988		1231316		1544518		1853755		1484914		841673		1006620		1121545		1399531		13560	2849	405299	182761
0.24_217.05		[M-H]-		217.048	ESI neg	0.238	3120080		1676840		4405093		1921290		3050274		4031796		5008468		3799390		2133656		2296142		2648080		3880176		71692	19526	1080657	559076
0.26_221.03		[M-H]-		221.03	ESI neg	0.259	3067378		2018108		3724582		1108730		3260742		3805126		4807213		3896605		2513847		3223872		3400250		3597217		0	2714	1510164	494685
8.99_223.80		[M-H]-		223.798	ESI neg	8.995	157002		331961		180195		203030		261227		273378		189850		271796		512141		252017		226958		293606		134506	155754	163894	165849
9.00_221.80		[M-H]-		221.8	ESI neg	8.999	116838		237751		127957		141470		190089		194780		137489		190716		361417		183019		162965		210149		95714	110178	119923	115822
8.15_223.80		[M-H]-		223.798	ESI neg	8.155	680912		890126		541178		615672		778411		849007		566208		816506		920158		806686		565747		844358		225176	329253	599463	589646
8.15_221.80		[M-H]-		221.8	ESI neg	8.155	478106		622542		378857		438481		551002		599632		401431		583057		634956		567128		403018		585047		149338	214640	432836	424739
8.03_223.80		[M-H]-		223.798	ESI neg	8.027	445130		603131		402679		348450		665420		744913		502744		549040		931218		634601		514095		640166		212869	259543	490735	536747
8.03_221.80		[M-H]-		221.8	ESI neg	8.028	331398		435030		295191		248547		478631		539895		357475		394749		649672		461315		377005		474425		144766	198293	352599	394342
8.64_223.80		[M-H]-		223.798	ESI neg	8.645	257690		449034		275449		264276		386159		368871		291586		428457		684346		394155		304617		394519		158749	207538	258435	279226
8.65_221.80		[M-H]-		221.8	ESI neg	8.647	189400		320652		196016		196183		269742		253163		210135		310090		479417		278002		204720		284658		113600	148908	192866	193299
8.29_223.80		[M-H]-		223.798	ESI neg	8.295	472489		614341		423698		432471		728357		699317		573972		630402		890526		642298		523968		689406		198930	266695	563798	493535
8.29_221.80		[M-H]-		221.8	ESI neg	8.294	321365		440147		294268		292968		510809		507166		407276		450447		617406		454562		372964		478184		148605	196679	393093	343593
7.76_223.80		[M-H]-		223.798	ESI neg	7.762	264600		393268		243525		191215		319183		344687		292567		281470		537510		306506		288019		278992		142682	124185	281194	192472
7.76_221.80		[M-H]-		221.801	ESI neg	7.764	185689		289340		173374		131365		224277		259269		214779		207463		390999		225158		204994		199161		95979	86230	221017	144883
8.53_223.80		[M-H]-		223.798	ESI neg	8.525	300365		487527		280096		297388		419823		442637		283408		443756		636984		403683		356045		414170		192321	192824	250829	265726
8.53_221.80		[M-H]-		221.801	ESI neg	8.527	221187		339125		202862		208991		292468		313711		191070		312308		449221		286698		253688		298290		138402	141802	177880	191070
0.22_228.96		[M-H]-		228.964	ESI neg	0.218	312037		275008		277076		421481		548737		381752		476064		370089		324005		358368		396073		403841		103394	81720	210238	138710
0.22_226.97		[M-H]-		226.966	ESI neg	0.218	2124362		1892072		2045086		2656072		3499689		2591256		2894604		2576578		2135212		2131876		2551474		2420030		453402	529430	1490762	1109826
0.21_245.96		[M-H]-		245.965	ESI neg	0.215	257625		214824		349448		100780		256005		269345		405809		271385		261307		408767		375613		308502		0	0	130783	28707
0.21_244.96		[M-H]-		244.964	ESI neg	0.207	1032278		843327		1472422		424472		1041665		1182556		1512270		1194961		1144807		1585807		1636395		1333711		0	4399	513959	169951
0.21_246.96		[M-H]-		246.961	ESI neg	0.206	487017		459165		637228		235303		486037		489201		655846		496318		464515		666996		690725		534565		4043	19878	316926	135332
0.25_247.04		[M-H]-		247.04	ESI neg	0.251	1289785		710426		1182660		642610		1318874		1880766		2623882		1424794		697603		662078		1065452		1185723		0	0	360935	132115
0.25_245.04		[M-H]-		245.043	ESI neg	0.251	4443845		2261385		4849475		2539705		5456527		6483946		8596247		4244126		2303970		2149388		3402216		3815639		0	0	1254867	462966
0.24_253.06		[M-H]-		253.057	ESI neg	0.245	442003		427689		667565		233800		673922		531234		512804		907027		771877		959266		996733		879197		0	0	280479	151901
2.33_263.12		[M-H]-		263.123	ESI neg	2.334	128395		265566		129330		125616		183987		200215		108256		235978		211960		272029		229770		120133		0	0	106464	71525
2.33_261.13		[M-H]-		261.126	ESI neg	2.334	415622		913635		429042		492292		656768		641842		379643		721870		790812		915624		730440		465487		3756	3453	366279	244760
0.21_264.93		[M-H]-		264.927	ESI neg	0.208	1367212		1295846		1546849		1518499		1686004		1589701		1693838		1605668		1367550		1859464		1865932		1421538		227367	71761	1049469	470800
0.20_262.93		[M-H]-		262.93	ESI neg	0.205	2313354		2030579		2416838		1181202		2595415		2444739		2800274		2514354		2159858		3059492		3105545		2365671		12012	21308	1617978	628247
0.21_274.96		[M-H]-		274.956	ESI neg	0.207	6520554		5262677		8976372		2338071		6576821		7049068		9477438		7399091		6406474		9763242		9472661		8112797		6736	25555	3278930	996786
0.21_272.96		[M-H]-		272.959	ESI neg	0.207	23698264		19749278		33621132		8675151		24960558		25820840		35142988		26396658		24588028		35238708		34825512		29960442		80626	74131	11984915	3686370
0.30_275.02		[M-H]-		275.022	ESI neg	0.299	1568407		322211		6300439		844260		1507173		1739923		2865918		2223724		427608		465877		944378		722118		0	0	255715	100202
0.28_274.03		[M-H]-		274.025	ESI neg	0.28	367854		0		1538521		176792		354121		359571		664980		525014		46935		49328		210411		145134		0	0	6310	0
0.21_290.93		[M-H]-		290.934	ESI neg	0.209	879492		677866		1005520		442022		794336		1412040		1068438		818586		892781		725600		650373		810873		74678	67394	684752	486292
0.21_288.94		[M-H]-		288.937	ESI neg	0.208	6411154		4445710		7477949		3220885		5819172		9876149		8430757		5920853		6478212		5809310		4627128		5992132		648924	503620	4868998	3056750
0.07_298.84		[M-H]-		298.835	ESI neg	0.065	118106		204172		137841		144424		91047		101707		112016		112206		264539		105609		117337		85986		13246	127703	111618	96098
0.06_297.83		[M-H]-		297.827	ESI neg	0.064	114058		163231		119948		132159		91872		94013		100554		86768		194105		99583		95626		82121		24366	110398	116736	84466
1.88_301.00		[M-H]-		300.998	ESI neg	1.877	667917		639012		827418		365876		749888		839994		883604		838166		664937		1079525		960891		1036120		59153	44919	305665	130251
1.90_298.98		[M-H]-		298.983	ESI neg	1.896	246306		202169		294212		117117		263465		302484		327093		319708		228805		388502		368816		356363		0	0	86035	17008
2.24_301.00		[M-H]-		300.999	ESI neg	2.238	67065388		49706324		70193464		32573004		76517896		70334608		79771944		80450840		55797772		88021592		81601680		91991928		1648358	2312812	56343108	24506684
2.24_299.99		[M-H]-		299.991	ESI neg	2.236	300503		255547		300460		190580		295500		304405		325535		347339		241671		311421		352448		326980		0	2549	247713	133021
2.77_301.00		[M-H]-		300.999	ESI neg	2.77	8601752		8484474		10947434		5530624		12596953		11079394		11457031		12779487		7893672		13032898		10837136		14066964		472528	554989	8126835	4801254
0.24_307.06		[M-H]-		307.061	ESI neg	0.243	469618		286909		601802		328615		488037		684379		774441		808554		483706		538083		641517		715124		0	0	210098	93105
0.24_305.06		[M-H]-		305.065	ESI neg	0.245	1534369		944701		2046361		1044260		1752687		2405276		2418997		2447606		1606043		1811814		2038379		2524246		0	0	670127	310590
0.20_308.94		[M-H]-		308.936	ESI neg	0.201	184370		177816		166475		136694		168205		179324		190797		200995		167278		217834		228023		169538		7743	8378	155427	148294
0.20_306.94		[M-H]-		306.939	ESI neg	0.2	687834		577741		626595		569448		697861		756272		738970		807326		585356		826336		871590		698541		8135	17453	580183	495135
0.06_308.86		[M-H]-		308.864	ESI neg	0.06	363511		512866		381980		398416		274718		244595		323565		282149		722203		276955		301708		246035		14342	326946	341682	270625
0.06_307.86		[M-H]-		307.856	ESI neg	0.061	212501		259831		203904		222748		149165		152543		174832		149483		355965		165354		180699		152665		113226	202124	211428	173265
0.26_313.11		[M-H]-		313.114	ESI neg	0.26	230953		261650		237868		109458		161154		302709		445120		356846		324900		516068		407762		728274		0	0	189901	100020
0.26_311.10		[M-H]-		311.099	ESI neg	0.26	468583		544974		580726		183891		442202		653720		603984		919110		854850		1238134		974041		1104425		0	0	416798	200721
1.41_316.03		[M-H]-		316.033	ESI neg	1.409	1288400		3250180		2979810		964928		3049722		7931295		9856654		8337638		930114		9544896		3287904		9771517		4847	4217	1331756	3112450
1.89_319.09		[M-H]-		319.094	ESI neg	1.892	1347304		656002		1552056		845135		1286195		1868747		2035978		1643794		1853776		2053824		1874090		1593342		0	0	703231	348600
1.23_331.10		[M-H]-		331.103	ESI neg	1.228	799815		1098597		3519424		2365926		1389310		491756		626414		332567		2950526		1288124		4569133		1550131		0	0	1158021	2605
2.02_343.14		[M-H]-		343.14	ESI neg	2.023	410577		419472		548984		335042		381189		495483		518416		321733		419283		501538		492460		433692		0	0	191863	124504
2.02_341.12		[M-H]-		341.124	ESI neg	2.023	908065		823282		1032724		513910		909072		1085716		1044176		667834		681209		913219		948794		784778		0	0	452259	271677
1.79_345.12		[M-H]-		345.119	ESI neg	1.786	338623		294779		435666		246961		370034		447494		442014		325422		290665		368365		311617		347823		0	0	183002	79203
0.69_346.05		[M-H]-		346.05	ESI neg	0.695	9966		355175		593303		209342		557541		526569		558402		399997		279765		384765		479456		382164		0	0	3355	2244
0.70_345.05		[M-H]-		345.046	ESI neg	0.697	590082		2501883		4044309		1497272		3820149		3708723		4068854		3294925		1851201		2715625		3376554		2652171		0	0	86517	86277
0.66_345.08		[M-H]-		345.083	ESI neg	0.657	109372		1410978		2540139		1015992		1365085		1545248		1619238		1626664		2452055		2600270		2474170		1701322		0	0	5252	24640
0.26_349.07		[M-H]-		349.072	ESI neg	0.259	221137		125721		258924		62830		160683		207730		249080		350261		299309		352137		312932		347873		0	0	102311	33079
0.26_347.07		[M-H]-		347.075	ESI neg	0.261	777505		498103		1104243		245333		589658		864501		976779		1401465		986923		1087606		1090301		1301984		0	0	371724	157630
0.26_349.09		[M-H]-		349.091	ESI neg	0.257	229669		154949		285359		211709		210088		308705		434666		327425		213117		271401		298475		524883		0	0	92015	34899
0.30_355.03		[M-H]-		355.031	ESI neg	0.3	2891320		3102561		2833557		1425151		3146325		3573459		3689793		4231005		3906776		4789188		4513837		4466182		0	11859	1422395	425175
0.30_353.02		[M-H]-		353.015	ESI neg	0.297	184912		291659		290319		93970		296863		310953		320001		450210		333203		482200		381206		477662		0	0	28474	0
2.01_355.10		[M-H]-		355.104	ESI neg	2.014	1023811		1252858		940440		823098		1609159		1363837		1692289		1192804		731304		856095		1438281		1039643		0	0	890247	420898
0.21_358.92		[M-H]-		358.918	ESI neg	0.215	124261		139069		198012		51223		167725		156056		212460		179152		146879		222406		211793		170723		3784	6932	65638	38000
0.21_356.92		[M-H]-		356.921	ESI neg	0.214	466799		499954		686432		344268		616832		642708		814509		593949		546919		739871		636213		592263		115165	116089	330901	255046
0.26_359.12		[M-H]-		359.12	ESI neg	0.26	221937		245035		224986		106169		138261		267717		328832		374686		352976		441629		334345		681557		0	0	163932	93479
0.26_357.10		[M-H]-		357.104	ESI neg	0.258	1076057		953462		1409277		503742		936672		1247920		1515127		1927126		1681474		2243176		1865796		2208832		0	0	851331	456388
0.22_366.87		[M-H]-		366.867	ESI neg	0.224	118452		196739		134795		288129		205617		108117		107301		162576		156936		195101		184010		188699		10439	28921	123726	51511
0.22_364.87		[M-H]-		364.87	ESI neg	0.224	702731		1032615		709668		1457358		905093		574685		585535		882384		741490		1008725		889914		984752		18824	34249	633359	289270
1.31_366.00		[M-H]-		365.995	ESI neg	1.31	395523		417372		288346		299374		192117		110721		149144		101630		381074		93083		143393		59694		0	0	357298	0
1.31_364.99		[M-H]-		364.987	ESI neg	1.312	385325		388049		272276		290515		172373		179311		257782		195278		382316		174378		211464		111256		0	0	312452	87326
1.40_366.00		[M-H]-		365.996	ESI neg	1.398	130840		417372		288346		299374		192117		197224		259227		156010		381074		212186		233040		132340		0	0	357298	108397
3.76_367.21		[M-H]-		367.207	ESI neg	3.763	656614		390574		1914460		646972		1403537		2024943		1905132		1640519		1177682		2160316		2023302		2152250		0	0	362474	122951
3.76_365.21		[M-H]-		365.21	ESI neg	3.763	2138004		1267897		6272394		2280974		4498006		6667784		6272220		5620265		4194631		7166719		6370244		6970103		0	0	1156331	404699
0.24_367.11		[M-H]-		367.105	ESI neg	0.244	3111543		1992265		13751107		2003898		4935568		6820585		5107731		9254931		5728006		5019585		4269693		5936398		0	0	1545589	358270
0.24_366.11		[M-H]-		366.109	ESI neg	0.244	727647		497608		3614528		490255		1183285		1730126		1129398		2296095		1420906		1250229		1000340		1542162		0	0	396752	94622
1.93_377.08		[M-H]-		377.082	ESI neg	1.925	352457		156962		219017		292411		322124		213309		407889		193995		67589		70024		105788		66146		0	0	203221	126075
1.93_375.09		[M-H]-		375.085	ESI neg	1.925	1220472		489953		739489		952792		1066498		713423		1274241		735939		249622		252051		362205		253173		0	0	614478	395446
0.23_382.84		[M-H]-		382.841	ESI neg	0.225	216045		386028		380087		244509		222500		143682		181354		308111		275605		515463		345383		382006		0	0	246376	56028
0.22_380.84		[M-H]-		380.844	ESI neg	0.223	764674		1461770		1276205		910503		797931		492836		619469		1105330		1048712		1734301		1258064		1433853		15710	22333	797148	197270
0.20_388.94		[M-H]-		388.937	ESI neg	0.205	1912168		1533594		2547073		605021		1905104		1846697		2741018		2254529		1851745		3202234		3141612		2483746		0	0	919187	180569
0.20_386.94		[M-H]-		386.94	ESI neg	0.205	4645908		3730046		6176614		1446763		4797414		4497614		6684272		5374532		4468729		7676812		7457900		6038342		4173	10759	2164618	483492
0.27_389.12		[M-H]-		389.119	ESI neg	0.266	2246803		2101247		2670229		4112668		3174912		2870545		2056338		587766		1215638		881782		1007680		635256		3962	0	1303091	851690
0.20_404.91		[M-H]-		404.914	ESI neg	0.205	871827		593964		1043075		320909		782086		1316253		1265059		834777		846148		927589		741371		966315		0	0	595756	219581
0.21_402.92		[M-H]-		402.917	ESI neg	0.206	3259679		2119938		4065332		1209608		2908248		4762566		4621931		3105840		3251282		3397864		2708290		3404132		22345	16103	2104963	777288
2.41_403.16		[M-H]-		403.161	ESI neg	2.409	3551733		3722636		5820108		4005646		4564715		5166291		4747296		4404913		3803424		4955977		4505826		4853349		0	0	1938495	781539
0.26_406.11		[M-H]-		406.109	ESI neg	0.255	496867		477622		425612		1064616		701721		531839		277242		67373		368433		180238		192659		78534		0	0	336676	236154
0.27_404.10		[M-H]-		404.104	ESI neg	0.265	14972344		14459944		15427724		30698104		20411688		15015498		10148026		4021448		10890890		6448504		7209958		3978108		249565	39905	10424332	6772995
2.61_406.18		[M-H]-		406.182	ESI neg	2.614	113358		138305		339387		156432		167255		280008		213799		181902		230525		283986		234799		221234		0	0	70697	14511
0.22_412.86		[M-H]-		412.86	ESI neg	0.222	528942		652854		832670		299590		618979		420184		633827		738879		609157		1069062		917558		847027		9699	0	411205	104996
0.22_410.86		[M-H]-		410.863	ESI neg	0.222	1531662		2069754		2534620		1160374		1913545		1398529		1970165		2237275		1952548		3062764		2597602		2554676		156476	43776	1325906	413810
2.95_413.22		[M-H]-		413.218	ESI neg	2.947	29792378		22722898		41030576		26148438		36348456		30840874		42657696		39199816		32656778		44054424		56699516		47899452		0	9414	14346594	6575870
2.96_411.20		[M-H]-		411.203	ESI neg	2.965	472920		359293		743787		349589		500347		797748		618222		663197		678462		836570		773439		833942		0	0	226706	99959
0.20_420.89		[M-H]-		420.889	ESI neg	0.204	244003		254604		258536		154879		173546		231720		220076		204855		292385		228621		241248		164948		3802	3286	197788	120211
0.20_418.89		[M-H]-		418.89	ESI neg	0.205	755128		732617		811418		511569		547220		1312829		902601		659660		942675		657507		663506		603574		104432	49385	673261	403623
2.82_423.00		[M-H]-		423	ESI neg	2.824	957707		742220		1349629		273023		1184492		1186050		1536760		1431561		974825		1867958		1828787		1916849		0	16625	584076	145695
2.83_420.98		[M-H]-		420.984	ESI neg	2.83	175489		137318		204986		65500		205590		208936		244960		239257		156255		279410		292759		295566		0	3734	113749	50175
2.91_423.00		[M-H]-		423	ESI neg	2.909	1684665		1409767		2497379		393458		2283566		2039588		2807206		2657837		2054313		4474061		4263596		3969164		0	6811	772048	190938
2.91_420.98		[M-H]-		420.984	ESI neg	2.914	273676		224912		335519		94689		317917		296373		358462		371758		295995		534028		510562		489320		0	3878	157782	61452
0.22_426.90		[M-H]-		426.905	ESI neg	0.216	119931		114400		137107		94698		211425		191409		229365		154167		146455		154976		188847		161051		0	0	57909	25900
0.22_424.91		[M-H]-		424.908	ESI neg	0.217	376586		382219		453447		300189		678326		512539		701852		546680		397245		524053		546256		496509		43106	46193	210370	88167
1.90_425.02		[M-H]-		425.015	ESI neg	1.899	2295403		2234188		3001410		1245178		2616964		2867208		3088132		3019445		2347406		3795546		3526084		3695743		2862	12247	902559	257058
2.57_425.02		[M-H]-		425.015	ESI neg	2.57	1719102		1242330		2007232		539641		1619821		1826420		1977779		1577457		925648		2127723		1807447		1903338		2917	25545	467678	202016
2.58_433.21		[M-H]-		433.208	ESI neg	2.576	762125		979243		1449469		642926		1053083		1406091		1455111		1549382		1450198		1825001		1887916		1384934		0	0	496462	190526
2.59_431.19		[M-H]-		431.192	ESI neg	2.593	281385		301470		425179		189298		383009		459561		436976		430596		347592		505293		491521		502227		0	0	168918	62648
2.77_433.04		[M-H]-		433.041	ESI neg	2.775	6349843		7077344		8596982		5446578		8829536		8498700		8507697		8517987		6371502		9768315		8655436		9181723		262735	406125	4216582	3202222
2.60_433.11		[M-H]-		433.114	ESI neg	2.603	7013371		7057988		8865644		1869314		5039956		8767701		8289808		7328248		3705162		4362116		5280573		4457370		0	0	2660380	953797
0.69_436.98		[M-H]-		436.978	ESI neg	0.691	163505		192042		139573		199718		123736		159979		142115		132928		154262		126067		119283		126373		0	0	174342	3835
0.70_435.98		[M-H]-		435.979	ESI neg	0.697	303516		385177		271162		379320		225745		309948		286485		268966		397163		227857		229402		202299		0	0	340344	240036
6.67_442.07		[M-H]-		442.071	ESI neg	6.673	316268		286964		411368		355719		315326		302758		258539		164626		365419		275392		376621		128383		0	0	289422	89191
6.67_440.07		[M-H]-		440.074	ESI neg	6.674	366075		347504		458392		408955		338767		341993		301147		164385		412508		301122		412818		142769		0	0	339018	92232
0.22_442.88		[M-H]-		442.88	ESI neg	0.217	427024		388237		662975		140945		534162		392372		692343		563621		461166		729257		617593		563189		127693	131986	232517	58412
0.22_440.88		[M-H]-		440.882	ESI neg	0.217	1001428		1001234		1617429		308594		1229361		1047887		1671280		1346120		1157399		1688675		1660535		1408679		170903	119475	610882	186054
1.88_443.19		[M-H]-		443.187	ESI neg	1.881	183217		225869		277319		167883		194098		258498		258364		262108		314524		253406		295926		205051		0	0	166607	94332
1.88_441.19		[M-H]-		441.19	ESI neg	1.88	554074		648689		914841		537088		642293		851389		816475		852886		859954		869173		961954		583084		0	0	550058	386797
2.65_449.11		[M-H]-		449.109	ESI neg	2.655	1077701		977263		1800067		514616		1066312		1499710		1660743		1374155		897464		1150283		1112690		1373449		0	0	515684	176626
1.76_452.03		[M-H]-		452.031	ESI neg	1.758	1258320		1193353		1417285		835914		1213194		2018222		2213086		2273060		1545980		3313053		3435733		3198240		3671	7369	1834533	902460
1.76_451.02		[M-H]-		451.023	ESI neg	1.764	265805		229885		230893		266932		264643		183671		182234		233283		267743		239058		274832		231031		3662	0	297318	198979
2.42_452.03		[M-H]-		452.031	ESI neg	2.416	2039138		3018854		4435550		1079225		2324695		3815858		2895435		3360497		5391326		7393796		6937180		6123302		0	4278	1178265	473925
2.43_451.02		[M-H]-		451.023	ESI neg	2.43	382798		423520		407268		301809		340938		510477		371639		429929		559240		618914		616356		482127		0	2132	328697	182400
2.95_459.22		[M-H]-		459.224	ESI neg	2.949	16418865		12927058		23608768		14470004		20363680		17238772		23547348		22452776		18344634		24661246		30547696		25720660		0	15578	7872954	3572975
2.96_457.21		[M-H]-		457.208	ESI neg	2.963	691059		535886		1137013		558792		788683		1133282		935241		993803		954450		1143393		1196982		1216136		0	0	337500	139769
1.79_462.03		[M-H]-		462.026	ESI neg	1.795	44307		102446		84127		63849		78271		48497		127324		70970		148357		129857		117738		116718		0	0	87176	27787
1.81_460.03		[M-H]-		460.029	ESI neg	1.812	151775		205943		180039		169730		195223		138678		174352		187500		179576		170939		165197		178251		0	6277	216458	146831
3.77_469.00		[M-H]-		469.005	ESI neg	3.77	1618279		1802112		2606210		1151596		2333244		2561150		2761061		2546908		1914699		3053657		2984109		2913809		160377	287439	854546	524032
2.33_473.20		[M-H]-		473.203	ESI neg	2.335	1058356		1454201		2066916		1375243		1772181		2515343		2324524		2607956		1992305		1863448		2576289		1846994		0	0	869703	400499
2.33_471.19		[M-H]-		471.187	ESI neg	2.326	976247		1233572		1717561		1206568		1602190		2016835		1694165		2231783		1793360		1591822		2603657		1557471		0	0	763294	337671
2.33_474.21		[M-H]-		474.206	ESI neg	2.329	260460		379730		532543		341932		438906		589303		492950		523150		490291		486457		682034		439042		0	0	197380	96996
0.20_474.92		[M-H]-		474.922	ESI neg	0.204	275220		252811		398968		92596		308497		253777		403870		343343		259761		520726		501630		391702		0	0	119890	12284
0.20_472.92		[M-H]-		472.925	ESI neg	0.204	401211		333324		547410		105853		420163		359138		647924		457662		392688		751678		789698		602675		0	0	159221	21325
0.63_476.04		[M-H]-		476.036	ESI neg	0.633	519063		229789		308914		102954		305095		254625		273030		214087		256103		402778		423822		350040		0	0	358615	116477
0.62_475.03		[M-H]-		475.034	ESI neg	0.623	3324778		1439570		2084330		757137		1947340		1716991		1907092		1891615		1710337		2692221		2671638		2277729		475	6690	2948518	829124
1.50_475.03		[M-H]-		475.034	ESI neg	1.499	59903364		64931108		63009228		60483640		62759152		66108012		37683068		37455472		56913660		34774924		64192128		35592996		292029	458933	50702864	9510043
1.13_475.03		[M-H]-		475.034	ESI neg	1.127	7056096		9997091		12921706		6571136		12510557		7107986		8761728		9710430		15258837		13201621		19983610		16566388		6574	24398	1539602	1531016
2.36_476.04		[M-H]-		476.04	ESI neg	2.364	311481		394948		398004		341840		397136		346345		325630		383651		451026		513399		489845		516138		20443	26661	284752	263338
2.37_475.03		[M-H]-		475.034	ESI neg	2.37	1949132		2143936		2082377		1644084		1863573		1957056		1743722		2160887		2301380		2911712		2672348		2731281		219349	217031	1702239	1649887
2.36_475.22		[M-H]-		475.219	ESI neg	2.362	1226927		1205062		2087974		1304440		2184606		2746595		2695366		2435341		1440896		1893201		2824865		1173569		0	0	817178	364561
0.31_481.06		[M-H]-		481.062	ESI neg	0.308	117406128		103586944		106983048		79665816		104271840		113815288		113641928		118533064		109675544		130096640		133153680		115790816		139247	240070	85631672	49891728
0.31_479.05		[M-H]-		479.047	ESI neg	0.31	280885		199549		266995		182326		282911		274396		279872		318073		290913		410149		384943		356714		0	0	198578	91549
2.60_479.12		[M-H]-		479.12	ESI neg	2.603	1462751		1478850		1886856		383020		1044848		1856360		1729613		1483013		762600		933422		1099941		890587		0	0	540160	190877
1.43_484.04		[M-H]-		484.039	ESI neg	1.427	3382226		3013772		3840140		2163648		3863160		3600266		3800121		3879077		3541535		4701107		4737921		4732488		0	2869	1507802	745750
2.79_495.15		[M-H]-		495.145	ESI neg	2.785	392823		352164		495055		206406		545940		596662		523716		537967		661757		905207		704535		827508		0	0	205851	105420
2.79_493.15		[M-H]-		493.149	ESI neg	2.785	1245185		1304142		1633214		674170		1882085		2182465		1626452		1922957		2261847		3157951		2395314		2728599		0	0	767436	329607
0.22_496.82		[M-H]-		496.822	ESI neg	0.222	137152		189170		234739		72863		140862		124918		149788		199235		167997		273193		234732		242974		0	0	116744	32935
0.22_494.82		[M-H]-		494.825	ESI neg	0.223	349623		469789		554542		293071		434750		338155		447936		493772		427112		733571		560353		598586		4019	1717	309550	115958
0.20_502.92		[M-H]-		502.918	ESI neg	0.205	545346		424600		755660		130800		583546		482384		804342		647215		542865		1091961		1015675		727206		0	0	220583	22463
0.20_500.92		[M-H]-		500.92	ESI neg	0.204	907753		716470		1146248		227065		1007066		768129		1311026		1055289		862870		1755770		1650664		1234427		0	3069	349383	46290
1.96_515.99		[M-H]-		515.99	ESI neg	1.964	376626		732617		318490		682406		220838		238227		238401		211643		539410		213185		221673		153749		5684	7102	618166	313742
1.96_514.98		[M-H]-		514.982	ESI neg	1.957	165992		364913		128986		315197		71124		88033		84703		76031		270348		74923		123230		64499		0	1415	252526	101749
0.21_518.90		[M-H]-		518.895	ESI neg	0.206	426070		303819		538432		112599		448400		624780		674239		477616		420464		508240		400848		484450		0	0	264102	70159
0.20_516.90		[M-H]-		516.898	ESI neg	0.205	967763		632371		1221523		298508		897118		1373815		1435151		1021581		1039826		1184577		947335		1094783		0	2309	584226	142802
2.94_522.21		[M-H]-		522.209	ESI neg	2.944	229492		124367		250478		152112		225671		201346		275679		267206		157624		306948		337374		319768		0	0	94164	29366
2.95_520.20		[M-H]-		520.203	ESI neg	2.947	3453000		2257657		4597420		2976487		4337478		3580970		4810411		4334672		2945525		5297442		6629856		5478103		0	0	1660534	727885
2.86_521.20		[M-H]-		521.203	ESI neg	2.862	188011		111451		178513		68916		141676		166772		175242		167307		128338		139339		178424		177560		0	0	47697	21185
1.12_525.00		[M-H]-		524.996	ESI neg	1.122	396783		742736		653444		454645		443118		217876		321725		316044		1028002		482081		676003		397639		0	0	117308	44777
1.13_523.99		[M-H]-		523.988	ESI neg	1.13	212670		373949		186781		233454		203420		142437		218810		223331		555230		278284		341914		314974		0	0	45053	25133
0.22_526.84		[M-H]-		526.841	ESI neg	0.219	133748		141322		255469		57048		167315		133709		214132		200294		167912		266761		252292		241077		40775	14889	95391	24673
0.22_524.84		[M-H]-		524.844	ESI neg	0.219	348669		351182		451876		161590		396714		377552		474955		455299		361903		529234		490399		473792		104677	97018	199082	71844
3.05_531.22		[M-H]-		531.223	ESI neg	3.046	819912		769278		1025260		713217		1673770		1345731		1982283		2196112		607970		778036		1381878		1100087		0	0	463098	208459
2.02_533.06		[M-H]-		533.057	ESI neg	2.015	229582		290233		234732		208258		239553		236890		247381		279788		245533		260990		317526		234512		0	4113	232714	159882
2.00_532.05		[M-H]-		532.049	ESI neg	2.001	198491		225847		230673		168889		232351		211305		217053		254856		231642		250022		272028		202578		0	0	131166	72896
1.20_542.05		[M-H]-		542.053	ESI neg	1.202	46787		26715		24889		14230		44077		448155		403155		1205518		39047		534237		147196		1167189		0	0	7626	1586
1.18_541.06		[M-H]-		541.055	ESI neg	1.184	729823		668356		603419		731181		884739		2191714		2206850		6338702		1656906		2841868		2738868		6412779		0	0	85473	64350
0.21_556.86		[M-H]-		556.861	ESI neg	0.214	121901		112284		196075		35626		129254		121207		207817		178314		125717		212083		210202		157179		0	0	41961	7352
0.21_554.86		[M-H]-		554.862	ESI neg	0.215	201519		200864		311139		82308		295421		244928		395454		300365		235073		375830		341941		304391		4411	2143	89112	32701
0.35_572.96		[M-H]-		572.957	ESI neg	0.349	257730		236660		236500		187309		204711		246247		241688		227363		277039		257635		265772		231686		0	0	252095	171289
0.39_570.96		[M-H]-		570.959	ESI neg	0.394	687737		657287		677788		511161		575658		675291		704282		637713		812903		713201		737490		559887		0	0	696799	477232
1.57_578.14		[M-H]-		578.139	ESI neg	1.57	5353724		3889406		7041964		3315537		5474957		5868506		6842299		5797806		4706168		5545131		5536966		6427229		0	1587	2144872	941967
0.22_580.78		[M-H]-		580.785	ESI neg	0.222	100196		152455		178769		76885		106625		83398		109318		147542		132360		207020		190026		183131		0	0	78607	18953
0.22_578.79		[M-H]-		578.786	ESI neg	0.223	203878		334692		366223		174802		232262		191933		260797		316589		282959		466071		367213		362288		0	0	185912	50881
0.40_580.99		[M-H]-		580.988	ESI neg	0.399	1478890		1242460		1456542		894664		1036602		1275878		1390106		1249760		1586183		1657530		1611054		1179492		0	0	1402843	723499
0.40_578.97		[M-H]-		578.971	ESI neg	0.4	249713		251390		253463		141976		136573		224098		221861		229555		285375		262979		283375		211998		0	0	259912	121012
2.56_585.05		[M-H]-		585.052	ESI neg	2.565	2068099		1732914		2411259		1373365		3295372		2794937		2510809		2774326		2929053		4234912		3731521		4204217		24349	56758	1536555	566011
2.59_605.15		[M-H]-		605.146	ESI neg	2.594	371329		324830		541395		277011		488510		549968		603182		457627		315960		555359		448227		530259		0	0	220133	100048
2.59_603.15		[M-H]-		603.149	ESI neg	2.594	1209918		1022494		1728235		821011		1572004		1777777		1880373		1485014		950160		1718665		1312568		1643582		0	0	657159	325628
0.22_610.80		[M-H]-		610.803	ESI neg	0.219	108861		100127		173624		29928		112408		123032		196955		172059		103926		222015		212898		142632		0	0	70637	14422
0.22_608.81		[M-H]-		608.806	ESI neg	0.22	185990		210496		351460		95104		266409		222790		301684		282890		288824		348168		306352		315543		56487	25972	137973	50101
1.99_609.06		[M-H]-		609.063	ESI neg	1.992	2277534		929931		1604017		1423723		2668101		2320845		1896663		2579594		1554976		1520373		1736520		1264884		5515	0	1371433	723974
7.76_613.41		[M-H]-		613.406	ESI neg	7.76	157504		131783		144810		67863		244660		262551		187893		234408		204189		212372		273118		235045		0	0	204149	166021
7.76_611.41		[M-H]-		611.409	ESI neg	7.761	505846		411894		450370		205496		764168		797854		580320		706804		634523		689100		806429		705639		0	0	627579	538780
1.61_615.11		[M-H]-		615.109	ESI neg	1.61	215190		157704		268960		164252		10854		295951		234647		214964		186859		194174		207429		232818		0	0	128379	65454
1.61_613.11		[M-H]-		613.112	ESI neg	1.612	678963		540588		758372		555470		760363		835920		773147		680091		548870		587764		620583		723136		0	0	396111	228388
1.31_635.08		[M-H]-		635.079	ESI neg	1.313	1416176		1163037		1837139		740367		1901454		668969		785876		284512		1361538		870424		2037981		425931		0	0	653052	1999
1.30_633.07		[M-H]-		633.073	ESI neg	1.304	18244930		15017582		23330736		9262038		24016838		8044998		10092860		4581508		5499525		11113581		26377180		3888264		0	14834	760854	97592
1.31_636.08		[M-H]-		636.082	ESI neg	1.314	265387		194198		332501		147396		367893		123317		126823		45484		240956		169308		387640		64398		0	0	122155	0
1.51_635.08		[M-H]-		635.079	ESI neg	1.508	757227		238460		284256		179863		368021		674066		735570		631558		200145		642223		274891		596614		0	0	561428	357754
1.52_633.07		[M-H]-		633.073	ESI neg	1.518	3053587		2415280		2859137		1783647		2927198		8784756		9310038		7913791		2046498		8224697		2901177		7548856		3356	21723	7336646	4702211
1.37_636.08		[M-H]-		636.082	ESI neg	1.373	310186		125829		227374		72134		328791		348213		407546		430028		164304		424841		387640		459296		0	0	122155	59003
1.36_633.07		[M-H]-		633.074	ESI neg	1.361	20940074		15017582		15322113		9262038		21218792		24922936		27203946		10600160		17183150		28517642		26377180		30468722		7428	11109	8438216	4071072
2.00_635.09		[M-H]-		635.089	ESI neg	2.005	3344624		2435068		3812832		2791481		4067891		3984952		4202836		4652084		4405706		4253144		5348289		4048999		14953	25300	1901778	757154
0.30_687.11		[M-H]-		687.105	ESI neg	0.3	209815		231096		251798		82192		268195		319187		336615		267196		336731		405676		401126		363545		0	0	74263	7403
0.30_685.09		[M-H]-		685.09	ESI neg	0.3	880238		980268		959939		400255		964015		1231507		1306737		1338561		1446944		1789802		1388173		1629228		0	0	391608	50386
0.27_721.20		[M-H]-		721.2	ESI neg	0.266	955483		531272		1219260		2265424		1537975		958766		633912		17915		174718		52354		104734		49526		0	0	221121	80756
0.27_719.20		[M-H]-		719.202	ESI neg	0.265	2677686		1584065		3684300		6162080		4219460		2825468		1949287		109126		623014		232726		377598		140468		0	0	699951	229220
0.69_786.08		[M-H]-		786.078	ESI neg	0.692	691603		474150		718707		291833		680441		580678		649959		689935		629936		789692		743810		871332		0	0	588589	340659
0.71_783.07		[M-H]-		783.069	ESI neg	0.706	40764552		26679890		41766528		15056700		38261060		31270474		36294000		20526816		35944388		47724676		43257880		23851214		8906	10339	34485580	16045186
0.54_785.07		[M-H]-		785.075	ESI neg	0.54	1117016		472537		549462		242307		465277		648785		546320		512344		603380		635910		757096		813088		0	0	757979	354365
0.54_783.07		[M-H]-		783.069	ESI neg	0.54	10555861		4340594		4814608		1822633		4375871		5911124		5144062		4764727		4400957		5852325		6004326		7306992		9076	7348	7230198	3200063
1.51_785.08		[M-H]-		785.075	ESI neg	1.515	3213076		519788		562828		522088		599205		3229624		3407650		3203740		519385		3475457		512473		3241805		0	4626	3489575	2411689
1.51_783.07		[M-H]-		783.069	ESI neg	1.51	36059600		5388198		5827554		5617908		6021447		36085460		37464248		33760656		5471349		38103516		4628210		36281736		94844	77312	37433500	25053076
1.79_783.07		[M-H]-		783.069	ESI neg	1.788	4750627		5512064		5779627		5673302		5236558		5489152		5683796		5538912		5862910		6914259		6409686		6549355		35957	64066	3572563	2535652
1.39_783.07		[M-H]-		783.069	ESI neg	1.389	7683368		7590106		9777712		5253625		10561533		10465239		11444032		13748102		10330515		14563659		12621208		16556491		15154	45747	4515672	2876320
0.60_783.07		[M-H]-		783.07	ESI neg	0.603	10864204		6052432		9878493		3790449		10377304		6773031		6990056		4764727		7649858		9067044		9785391		6967324		3830	7348	1012274	562660
0.60_785.08		[M-H]-		785.075	ESI neg	0.603	1126355		655535		1032210		398765		1071950		746726		750387		512344		812796		969888		1034620		774346		0	0	103190	60584
2.09_783.07		[M-H]-		783.07	ESI neg	2.087	2605831		2172516		2383932		2108870		3037773		2272784		2456272		2631158		1864910		2227731		2119231		2011786		36635	53429	1974577	1504116
2.17_784.58		[M-H]-		784.578	ESI neg	2.168	206011		240476		254632		215880		371150		255165		267538		307033		266778		273933		272020		271364		0	0	160341	83947
2.17_783.57		[M-H]-		783.57	ESI neg	2.168	193396		171915		207329		151186		189369		228214		239287		220242		177445		261846		231784		234260		0	0	140222	79300
1.66_785.08		[M-H]-		785.085	ESI neg	1.656	10900410		7432280		10685096		4946203		17656700		12724713		11599241		16066436		11106502		14930239		12347958		16094451		0	7085	5546157	1892496
1.87_801.08		[M-H]-		801.08	ESI neg	1.869	875956		737213		932453		433886		1043320		1074156		1104296		1128960		542901		891211		980514		818818		0	0	404842	123655
1.37_801.08		[M-H]-		801.08	ESI neg	1.367	332197		374561		519802		244015		598240		497545		562555		447206		495763		738358		586924		577252		0	0	170067	84170
1.95_858.07		[M-H]-		858.067	ESI neg	1.951	6235682		9531212		10398871		12270595		10834696		9080669		10003520		9168421		13313079		11278866		12854122		14254424		11753	27754	6169373	3713305
2.42_905.07		[M-H]-		905.07	ESI neg	2.417	466957		733553		1172581		234172		604447		1045820		768742		930615		1354530		2188087		2059047		1997931		0	0	259704	94308
1.74_905.07		[M-H]-		905.07	ESI neg	1.74	395312		488727		642689		297340		540793		546465		553560		625502		580805		807871		868708		831315		0	0	391171	163623
2.75_905.11		[M-H]-		905.107	ESI neg	2.749	276840		281132		489731		211618		381095		417833		424515		397753		375966		534648		414651		643268		0	0	130126	35235
1.96_927.11		[M-H]-		927.112	ESI neg	1.963	452451		392004		458043		181213		427323		631456		528505		506936		364182		528777		438774		387659		0	0	242826	41783
2.45_934.07		[M-H]-		934.069	ESI neg	2.454	1375111		2510326		2584730		1834188		2710187		2252707		2750373		2685873		4033726		5075546		4986883		5933102		0	4321	1124899	443039
2.46_933.06		[M-H]-		933.065	ESI neg	2.457	3010734		5361442		5528023		3753761		5812570		4818258		5823032		5670110		8570328		10916574		10591900		12839336		4809	16009	2309318	954164
2.11_935.07		[M-H]-		935.072	ESI neg	2.109	1728195		2332586		2233531		1664081		2847226		2260680		2143871		2525007		2817084		3337685		2952498		3170194		3452	6182	1391363	566765
2.10_933.07		[M-H]-		933.065	ESI neg	2.098	7601404		13619233		12388789		9650596		14271053		9976559		11629703		12943114		17491150		21333568		19778098		20162648		0	18452	6260662	2417636
1.98_936.07		[M-H]-		936.073	ESI neg	1.982	317446		427561		420948		350902		436938		445283		392270		459224		513578		629675		255267		595799		0	6813	245415	133469
1.97_934.07		[M-H]-		934.069	ESI neg	1.972	3727063		5904354		5380414		935945		5468264		5397066		5346466		6211364		7122738		9061014		1707902		8489467		0	2095	2971186	1255050
1.79_935.08		[M-H]-		935.08	ESI neg	1.787	13200309		14784327		16532536		9705686		19227096		16096651		15875792		16508854		12837703		14975729		13082823		13950336		0	2800	8055901	3309528
1.79_937.09		[M-H]-		937.086	ESI neg	1.786	2084363		2210422		2406795		1450664		2892914		2496390		2387344		2565964		1914767		2291104		25304		2066344		0	0	1246814	518285
2.37_941.12		[M-H]-		941.117	ESI neg	2.37	132342		61159		163476		96376		352311		200431		215423		367471		336246		265566		266333		349298		0	0	79250	7953
2.00_944.08		[M-H]-		944.082	ESI neg	2.002	395027		492026		445772		286386		439762		507961		518543		512876		393800		515686		540800		494731		0	0	216803	144167
2.01_942.07		[M-H]-		942.07	ESI neg	2.008	1797930		2409798		2441160		2278162		2295122		2561358		2731233		2602927		2599442		3214976		3221786		2993532		3675	0	1546458	755251
1.00_953.08		[M-H]-		953.08	ESI neg	1.001	144428		174053		260535		87504		239116		207258		258866		17948		305293		468338		452773		143489		0	0	56137	7422
1.00_951.08		[M-H]-		951.075	ESI neg	0.996	947629		1143879		1733513		589028		1675492		1339915		1528165		946236		2016971		3205270		3030908		1875032		0	1947	505081	229488
0.93_951.08		[M-H]-		951.075	ESI neg	0.932	204896		1294889		1830451		628648		1616206		378553		443656		169391		1772806		1123282		1727286		269970		0	0	324848	50608
1.19_953.08		[M-H]-		953.081	ESI neg	1.189	68902		113935		136832		64195		153702		517221		638399		241704		189486		1071225		856606		561206		0	0	15431	4738
1.20_951.08		[M-H]-		951.075	ESI neg	1.199	394421		683769		966799		368046		950309		3224413		4025248		1631540		1084295		6731860		5584842		3963785		0	0	117862	50832
1.48_953.08		[M-H]-		953.081	ESI neg	1.484	5130053		5301531		6178098		4935428		5723688		3497422		4008234		2502018		5099966		3917477		6563418		2691942		0	1476	3745162	62488
1.49_951.08		[M-H]-		951.075	ESI neg	1.492	36510548		38424904		43342124		34314236		39888692		43400584		24994200		20941472		35921492		29080410		46468656		21619682		24722	57344	26449872	956605
1.54_953.08		[M-H]-		953.081	ESI neg	1.542	5130053		5301531		6178098		4935428		5723688		6025342		5425692		5518819		5099966		6474544		6563418		5537960		0	1869	3745162	2204230
1.54_951.08		[M-H]-		951.075	ESI neg	1.543	36510548		38424904		43342124		34314236		39888692		43400584		38201608		38240972		35921492		45229696		46468656		40192184		10792	28432	26449872	15108653
2.39_1085.08		[M-H]-		1085.08	ESI neg	2.391	426915		587220		707310		441406		896169		653575		865843		875902		910587		1016457		1232113		1341687		0	0	275631	103887
2.67_1085.08		[M-H]-		1085.08	ESI neg	2.673	212708		342906		429805		234493		465433		390081		474174		543920		577978		796200		750720		823203		0	0	166551	66488
2.32_1085.08		[M-H]-		1085.08	ESI neg	2.322	1376256		1426073		1870967		1676668		2400354		1781686		1771308		2192574		1262443		1503571		1658914		1881986		0	0	773771	340813
0.26_499.07		[M-H]-		499.074	ESI neg	0.262	177184		203043		112365		48785		156415		188565		205226		248596		162154		305329		317671		288368		0	0	124555	54717
0.29_103.00		[M-H]-		103.004	ESI neg	0.29	429038		555363		609759		407885		730711		582739		634269		718610		581889		668569		757333		614944		28535	26254	295699	127643
0.29_87.01		[M-H]-		87.0087	ESI neg	0.29	782693		808312		1506413		800438		1106853		1100501		1239643		1194458		853674		1023701		1057703		1078533		562704	304427	582952	397137
0.30_101.02		[M-H]-		101.024	ESI neg	0.296	1320930		1373610		3651147		890846		1660158		2060128		2037358		2637078		2317147		2591708		2322008		2380481		215418	181658	1235232	729897
0.30_203.02		[M-H]-		203.02	ESI neg	0.301	3959478		4407878		6441493		2619532		5639034		6849692		6720609		7468722		7679190		9439609		8317852		8779096		19476	19831	2040822	741764
0.33_541.05		[M-H]-		541.055	ESI neg	0.325	316012		1105144		1571502		928148		1998353		992414		908947		413123		1072214		1131095		1787881		374882		0	0	168349	3384
0.35_125.02		[M-H]-		125.024	ESI neg	0.35	123590		275699		333109		209007		408558		387236		318603		445622		245517		370357		329392		429948		113262	101337	117877	134548
0.35_232.01		[M-H]-		232.01	ESI neg	0.353	889		135071		219434		83671		277222		284448		191445		340325		149856		214488		198971		294095		0	0	0	0
0.35_539.02		[M-H]-		539.021	ESI neg	0.352	220323		167739		171289		128911		214295		235536		198833		238015		181915		232820		229218		228295		0	0	217904	233406
0.35_597.98		[M-H]-		597.977	ESI neg	0.351	312553		307835		296803		218385		244138		272543		303143		285835		385894		340870		326487		255490		0	0	333827	243538
0.39_566.04		[M-H]-		566.041	ESI neg	0.39	232072		193013		169575		159116		242642		274207		204601		244187		195928		246198		254280		250508		0	0	250738	379485
0.45_475.03		[M-H]-		475.034	ESI neg	0.446	1031906		2072265		2060513		1078862		2119673		2451505		2743929		2910148		2451829		4105660		3240367		4023218		12127	22500	717389	482935
0.46_439.98		[M-H]-		439.985	ESI neg	0.462	208113		402794		407027		322736		333431		276132		552949		309674		407942		338488		395481		230525		0	0	349465	161114
0.48_453.04		[M-H]-		453.039	ESI neg	0.479	98394		106450		134962		86148		178859		170827		230197		262267		190654		254854		261295		305450		0	0	39557	19624
0.50_295.10		[M-H]-		295.103	ESI neg	0.5	265538		163482		215592		137287		200507		229252		281055		180632		185678		216160		227369		261448		0	0	176724	88268
0.69_649.07		[M-H]-		649.069	ESI neg	0.69	74371		1195650		1692572		545544		1396232		1307666		1358480		1230933		1463903		2486804		2191715		2095983		0	0	43760	30781
0.72_880.98		[M-H]-		880.98	ESI neg	0.719	261047		304401		238538		185512		161757		145152		196294		154644		256622		167151		187088		139232		0	0	272008	103327
0.75_836.99		[M-H]-		836.987	ESI neg	0.753	170963		172937		167016		132742		102058		71817		155449		113523		212489		148072		137882		107521		0	0	191230	68494
0.76_819.05		[M-H]-		819.047	ESI neg	0.764	336809		259928		333584		187502		374695		335417		322533		357004		286489		394044		351662		422298		0	0	327390	249375
0.81_375.13		[M-H]-		375.13	ESI neg	0.812	0		176098		94899		215166		136159		369545		457437		406021		336739		675175		713833		649917		0	0	0	0
0.83_805.05		[M-H]-		805.054	ESI neg	0.827	170270		164879		164123		156213		194756		210114		179455		176222		131933		185647		193710		222045		0	0	13930	17495
0.92_391.03		[M-H]-		391.031	ESI neg	0.918	3892604		9545595		7759452		14788414		10342592		21681728		21134512		21937318		22415058		25513956		23645612		23820768		5260	19096	1362582	959481
0.92_832.02		[M-H]-		832.024	ESI neg	0.923	2049		94446		12960		50807		222575		301385		371404		269759		607362		304307		295934		267592		0	0	0	0
0.97_819.05		[M-H]-		819.046	ESI neg	0.967	73825		167740		138231		285923		421189		482664		415086		458417		371457		449096		456268		456497		0	0	28342	12065
1.04_527.07		[M-H]-		527.065	ESI neg	1.04	5610696		4189592		7389261		2845930		6323750		2977966		3485933		1693391		5216018		4362753		7066868		2132152		0	0	268429	291034
1.05_394.06		[M-H]-		394.063	ESI neg	1.053	27368		8586		18562		5613		48999		1114482		940147		892632		16846		341413		131899		1024507		0	0	0	1147
1.09_483.08		[M-H]-		483.078	ESI neg	1.087	417843		234262		518467		163864		572617		639200		645862		1372349		260876		678785		353442		1808055		0	0	77279	38622
1.13_361.11		[M-H]-		361.114	ESI neg	1.127	412792		351929		582081		328658		475147		211039		214830		116302		542930		221704		790462		252834		0	0	168422	91497
1.14_368.10		[M-H]-		368.099	ESI neg	1.143	491453		333759		661465		819781		807398		393192		365147		215296		363105		281436		441183		219271		0	0	133565	68442
1.24_469.00		[M-H]-		469.005	ESI neg	1.244	6652004		4533687		7157178		2315254		7282602		7949753		9440862		4701440		5187378		10783967		9399954		6174952		0	11094	2858227	64293
1.26_420.03		[M-H]-		420.034	ESI neg	1.263	0		0		2140		0		4331		0		9800		4365		0		2576		4078		4122		0	0	105582	3195
1.27_377.11		[M-H]-		377.109	ESI neg	1.271	62414		96320		123296		242125		81923		789778		947110		1210734		1869371		2281460		2954778		3485187		0	0	731962	390397
1.32_206.05		[M-H]-		206.046	ESI neg	1.316	693392		43987		123036		110801		156702		852357		1364722		554344		183455		499847		440618		783746		0	0	430670	172501
1.34_532.05		[M-H]-		532.049	ESI neg	1.336	425700		250384		365321		188114		379542		429638		332930		419678		306222		430195		437929		467081		0	0	181535	103179
1.36_669.05		[M-H]-		669.051	ESI neg	1.361	473165		291762		406981		223063		402637		472125		469300		242248		274875		506213		419613		287534		0	0	219231	123279
1.37_708.07		[M-H]-		708.072	ESI neg	1.372	373076		864486		757438		696107		535034		681724		904388		921002		331889		1059424		922762		1193511		0	0	176881	44865
1.39_353.09		[M-H]-		353.088	ESI neg	1.388	917624		750347		1008034		892757		1446423		977275		1092847		1210186		1014151		1041031		1559056		1652806		0	0	527430	188350
1.39_680.10		[M-H]-		680.102	ESI neg	1.387	328610		161124		390931		194200		328664		357264		438169		318686		277151		405201		370829		527421		0	0	163211	107805
1.41_730.98		[M-H]-		730.984	ESI neg	1.406	225498		256304		209889		104939		142776		161917		189714		166722		278850		158464		164429		111108		0	0	167041	34736
1.42_321.07		[M-H]-		321.075	ESI neg	1.42	83946		26616		642252		334075		59088		451414		464531		396374		491453		436097		401659		704535		0	0	379882	246708
1.43_876.08		[M-H]-		876.077	ESI neg	1.434	153613		166423		197531		145325		259652		211558		249941		239974		239164		308337		308530		363881		0	0	105582	11065
1.46_708.07		[M-H]-		708.071	ESI neg	1.463	1107810		864486		750734		696107		897827		889127		982081		778326		698009		840624		877161		760340		0	0	854918	429965
1.48_969.09		[M-H]-		969.087	ESI neg	1.477	287605		276532		423415		205541		423683		432745		411722		474427		358701		584220		553200		644967		0	0	142723	38004
1.54_559.04		[M-H]-		559.037	ESI neg	1.543	765265		715219		844716		451939		783607		812153		724462		774762		613077		859056		722600		767261		0	0	350146	141264
1.55_617.06		[M-H]-		617.06	ESI neg	1.548	294617		225180		256432		126354		352585		285199		217794		292759		183245		268916		245131		187327		0	0	96311	50465
1.56_645.13		[M-H]-		645.131	ESI neg	1.563	925912		931375		999888		414958		899453		964086		1068313		1051740		816770		1154107		833724		1241557		0	0	524545	240638
1.56_680.10		[M-H]-		680.102	ESI neg	1.562	285831		215107		392841		175929		348202		396448		381230		325775		305593		325862		309349		420661		0	0	145839	68914
1.56_909.09		[M-H]-		909.091	ESI neg	1.565	615209		597360		796542		304485		675768		616127		760932		694432		617348		945142		814187		851850		0	0	194347	90791
1.57_908.09		[M-H]-		908.089	ESI neg	1.573	1904885		1808492		2499045		1061932		2157948		2085665		2385563		2203948		1946942		2955043		2700757		2988887		0	0	609017	289362
1.58_1003.11		[M-H]-		1003.11	ESI neg	1.577	195296		159152		223434		88779		205489		217475		279513		213582		140343		268598		236353		248174		0	0	126525	61120
1.58_1087.11		[M-H]-		1087.11	ESI neg	1.576	367622		363131		512637		160716		373494		410095		535667		447517		401450		595876		606546		570954		0	0	120693	34648
1.59_481.06		[M-H]-		481.062	ESI neg	1.59	298720		247273		330450		169796		341347		296369		303493		317666		256471		365500		426663		307275		0	7794	207982	264994
1.59_482.02		[M-H]-		482.023	ESI neg	1.587	125187		161795		134167		109235		173661		140396		240974		191001		217033		157125		175389		241107		0	0	151597	63011
1.60_407.10		[M-H]-		407.099	ESI neg	1.6	414590		521452		677855		253833		483311		523391		602763		515560		565086		675952		696178		790664		0	0	290642	113446
1.60_410.03		[M-H]-		410.027	ESI neg	1.605	605139		423289		487808		448554		714427		572483		475237		633822		505725		511570		464070		585344		0	0	580593	323035
1.61_169.01		[M-H]-		169.014	ESI neg	1.612	280255		168613		245367		137788		415102		382773		265509		399403		246702		305039		250181		382484		157417	100770	243146	245634
1.61_295.01		[M-H]-		295.01	ESI neg	1.606	63962		80293		91619		31753		129593		85373		137885		139378		77785		102237		120473		153732		0	0	83427	37779
1.61_929.08		[M-H]-		929.079	ESI neg	1.612	460491		611254		811870		292709		678426		696831		658008		679950		712239		1186226		1053780		1102588		0	0	162062	56417
1.63_389.00		[M-H]-		388.997	ESI neg	1.633	779130		937498		681784		1029453		367386		517973		484251		281049		1134393		355152		404515		256624		0	0	682927	261193
1.64_288.99		[M-H]-		288.986	ESI neg	1.635	543492		380158		655040		388044		493025		677754		539656		485232		550313		609465		559986		628214		0	0	215585	89583
1.64_469.03		[M-H]-		469.034	ESI neg	1.635	163603		381212		231222		189987		264465		243537		307387		303856		248094		336855		345328		300911		0	0	359038	151280
1.65_241.04		[M-H]-		241.036	ESI neg	1.649	361830		298630		290385		254050		369094		330384		375538		400905		347527		382223		439627		373728		0	0	247139	102043
1.65_392.04		[M-H]-		392.038	ESI neg	1.649	9699318		7284202		8454565		5688842		12967962		9917532		9075145		12149904		9362963		10752000		9213729		11292607		3160	16857	6777448	2694408
1.65_440.99		[M-H]-		440.993	ESI neg	1.652	456134		482990		273072		422839		321473		251766		277586		284210		539510		232509		226592		167484		0	5148	482426	154512
1.65_442.03		[M-H]-		442.028	ESI neg	1.653	7527		3871		0		3441		0		0		0		0		0		4477		0		0		0	0	158480	45958
1.65_677.09		[M-H]-		677.089	ESI neg	1.645	319273		262481		335131		166869		388273		342397		289826		377289		177428		245974		316142		212566		0	0	156529	77010
1.66_460.03		[M-H]-		460.029	ESI neg	1.656	177790		292494		199193		184118		249722		195330		294012		260701		256339		319797		367785		282535		0	1971	310709	124715
1.66_533.28		[M-H]-		533.282	ESI neg	1.658	217853		200271		221868		172486		244833		149040		225815		231482		211131		199911		255952		201887		0	0	163240	115805
1.66_619.07		[M-H]-		619.066	ESI neg	1.656	266722		362440		294846		179679		275457		279233		317323		334654		355770		460634		394875		380994		0	0	152114	62196
1.67_313.09		[M-H]-		313.093	ESI neg	1.666	832208		882029		1515438		1080338		1206542		1037965		1127552		845800		1261152		1766459		1732168		1819841		0	0	565345	277445
1.67_443.03		[M-H]-		443.026	ESI neg	1.67	172528		146788		244779		24421		231974		380759		434464		428618		171279		526444		313592		499183		0	0	54298	9042
1.68_325.05		[M-H]-		325.048	ESI neg	1.682	6130148		4316118		6835848		5167373		5524552		7127651		5275378		4606115		5987380		6010174		5539941		5372556		0	1718	3201432	1671335
1.68_352.07		[M-H]-		352.067	ESI neg	1.684	6811204		4486582		6619455		5868440		5291833		7014708		5330330		4688776		5836954		5838632		5267678		5312776		3452	4190	4092814	3448615
1.68_485.08		[M-H]-		485.084	ESI neg	1.684	176810		148593		201486		113469		233846		212677		189797		209610		200389		300786		284409		301114		0	4845	113823	42413
1.68_542.03		[M-H]-		542.034	ESI neg	1.682	148903		210322		250053		227186		281994		192884		214870		214757		296582		246650		269780		311024		0	4997	146529	83916
1.68_627.17		[M-H]-		627.173	ESI neg	1.682	401706		286729		525785		251267		549767		517566		596613		457224		414566		499287		435036		761270		0	0	73592	9694
1.71_355.10		[M-H]-		355.104	ESI neg	1.711	1135089		789272		1146920		879284		1442118		1128428		1500708		1261094		937871		1177993		1051617		1224214		0	0	661644	341296
1.71_420.03		[M-H]-		420.034	ESI neg	1.712	0		15554		0		0		7747		0		5958		10175		0		0		5534		0		0	0	169025	70845
1.71_588.07		[M-H]-		588.066	ESI neg	1.708	201460		197112		173557		179207		217540		217144		300690		207328		193898		234031		246287		200266		0	2028	242451	189632
1.72_496.04		[M-H]-		496.039	ESI neg	1.719	300027		239630		289090		198862		289516		294693		305264		211630		113174		227579		200388		190471		0	0	491960	254754
1.72_755.10		[M-H]-		755.101	ESI neg	1.719	778733		627580		921653		486226		591009		810196		783291		641094		566638		1023797		719169		879083		0	0	414734	255284
1.73_1103.09		[M-H]-		1103.09	ESI neg	1.73	262867		247660		293748		169872		358522		312516		270733		298293		305887		355625		353787		342703		0	0	144651	52198
1.73_247.02		[M-H]-		247.025	ESI neg	1.726	987560		825041		1318220		320284		1612040		1465358		1586890		1882329		1098313		1855006		1740356		1963142		0	0	333792	96787
1.73_309.10		[M-H]-		309.099	ESI neg	1.727	178628		126396		218164		138480		221806		181228		189280		255683		114544		138896		228252		210980		0	0	126771	67699
1.74_253.04		[M-H]-		253.035	ESI neg	1.74	351228		216483		573289		67166		580565		575593		720622		604996		345296		599617		600015		872444		0	0	125889	27939
1.74_443.19		[M-H]-		443.192	ESI neg	1.744	694547		543143		690768		556733		709850		637364		672710		796953		784080		600707		705392		759653		0	0	413545	259443
1.74_465.10		[M-H]-		465.103	ESI neg	1.742	326926		173500		272797		210870		300784		271991		283005		237239		71139		173390		167064		120236		18563	32806	171766	78227
1.74_506.19		[M-H]-		506.188	ESI neg	1.743	969545		719496		791969		1062030		872409		826724		836974		894474		903675		666099		825770		796097		0	0	900212	1089156
1.75_532.05		[M-H]-		532.05	ESI neg	1.753	625062		747511		720413		637592		876110		706636		645340		817709		879856		1134411		1067912		867854		0	0	538203	388161
1.76_572.06		[M-H]-		572.055	ESI neg	1.758	267174		257455		301204		182739		304765		322064		300976		284044		312086		323773		283032		310764		0	0	198341	95525
1.76_576.13		[M-H]-		576.128	ESI neg	1.762	858626		707235		1086639		697728		644974		1017711		932895		897384		770070		850856		878544		980429		0	0	523868	317947
1.76_943.58		[M-H]-		943.577	ESI neg	1.764	301675		284910		329302		365213		343546		372029		343236		358234		456114		406348		450401		492240		0	0	171547	65573
1.77_177.06		[M-H]-		177.056	ESI neg	1.77	585686		192224		337375		392830		500118		305816		637287		403462		103484		124512		186586		178494		6175	3135	205426	117146
1.77_274.09		[M-H]-		274.093	ESI neg	1.768	97181		210626		560615		79417		405356		206291		246466		366392		407403		654093		702060		930685		0	0	151187	64700
1.77_549.05		[M-H]-		549.053	ESI neg	1.773	488655		432970		481521		219386		472832		519402		421316		455934		350144		437672		297328		424616		0	0	319615	162236
1.77_791.07		[M-H]-		791.068	ESI neg	1.774	265715		280698		298416		297430		264455		279364		324606		254490		319492		346887		365690		321016		0	0	207388	123753
1.78_378.04		[M-H]-		378.041	ESI neg	1.784	397671		284914		330699		216255		374907		293007		340360		377674		217474		203567		309275		177654		0	1838	186940	97686
1.79_462.04		[M-H]-		462.045	ESI neg	1.79	232177		265904		314606		179952		229440		228638		242147		214634		268369		358759		336574		302647		0	0	159360	70237
1.79_488.04		[M-H]-		488.041	ESI neg	1.786	463583		320286		395765		258552		441277		379448		449711		414701		208545		352616		267766		232004		0	0	400884	230180
1.79_523.04		[M-H]-		523.044	ESI neg	1.788	232999		220960		309949		167788		274740		224265		249791		219511		181600		320840		338173		220396		0	0	134031	86262
1.79_609.06		[M-H]-		609.063	ESI neg	1.79	318637		202296		236661		190642		384835		350769		235513		275702		168311		198524		194735		156220		0	0	215446	111096
1.80_179.04		[M-H]-		179.035	ESI neg	1.797	126750		144526		174707		47595		141812		138803		108660		171564		116907		164189		163815		175063		7590	12228	107890	64539
1.80_325.09		[M-H]-		325.093	ESI neg	1.802	401152		793088		678097		1016770		822343		542024		739502		972820		1261826		1248737		1681910		1576370		0	0	544810	298615
1.80_512.06		[M-H]-		512.06	ESI neg	1.799	47550		37616		7949		22154		41490		7648		32139		6704		12823		23124		6970		8016		0	0	441199	228138
1.80_720.16		[M-H]-		720.16	ESI neg	1.796	849516		734807		1033079		786076		778993		999949		947323		824394		948011		905837		871620		989633		0	0	474256	308247
1.80_747.10		[M-H]-		747.103	ESI neg	1.801	2046886		1692767		2146178		1213773		1938664		1913209		1911668		1706667		1287170		1524446		1405392		1337892		0	0	1232960	712071
1.81_305.08		[M-H]-		305.078	ESI neg	1.807	5747642		2156033		5366559		3839755		5952306		8616165		7235276		8805899		7230889		8437314		11091086		7450296		0	0	2708569	1214132
1.81_385.11		[M-H]-		385.114	ESI neg	1.815	4200050		95806		192994		134973		3254609		2363116		4533041		2690004		96269		960615		1311501		1231384		0	0	1393178	691551
1.81_523.99		[M-H]-		523.988	ESI neg	1.806	301606		372814		250779		565800		194547		170106		212469		195829		471372		149478		185496		109023		42823	31582	611934	368836
1.81_602.06		[M-H]-		602.063	ESI neg	1.81	1504020		1265241		1790309		1686057		1628927		1640889		1569978		1308858		1164054		1326792		968176		1169863		0	0	1027258	533495
1.85_475.23		[M-H]-		475.227	ESI neg	1.85	209880		284373		261519		229779		202523		259646		227688		197927		175357		271405		260330		253507		0	0	214818	86741
1.85_486.02		[M-H]-		486.025	ESI neg	1.851	554081		480154		404180		789733		522000		508872		454121		410619		386779		342462		383060		319565		24979	59965	1040881	1308524
1.86_400.04		[M-H]-		400.036	ESI neg	1.857	1347288		775338		1197526		283370		502691		1189283		1244682		1036796		327411		745184		426651		679108		0	3844	751945	392059
1.88_299.99		[M-H]-		299.99	ESI neg	1.884	429435		301833		479371		151033		462440		433241		518029		496637		322697		514237		523281		512954		0	0	183664	48762
1.88_410.03		[M-H]-		410.027	ESI neg	1.879	394825		250455		264829		276404		425240		406606		271158		376642		304198		295176		267919		309317		0	0	534090	377020
1.88_469.00		[M-H]-		469.005	ESI neg	1.877	27154710		23034484		30468008		12946323		29545104		29365442		33020476		31776622		24350342		37978540		35084700		36295756		149488	281174	11609432	3570307
1.90_617.03		[M-H]-		617.032	ESI neg	1.9	265620		178793		263241		237465		309263		247337		300292		280044		220228		230131		199421		181873		0	0	211413	129429
1.91_272.08		[M-H]-		272.078	ESI neg	1.909	63397		85617		202937		20412		118260		63986		112991		115273		207905		358750		178543		259017		0	0	56639	26928
1.94_905.07		[M-H]-		905.07	ESI neg	1.939	366373		405013		502179		316837		475602		435655		496871		452266		518363		664397		671730		671449		0	0	348587	140742
1.96_466.03		[M-H]-		466.028	ESI neg	1.962	30431374		45217296		38444504		39367664		37315396		38019768		36480212		41689408		49139596		52821904		51827888		51618656		219985	290581	30053334	16116334
1.97_679.08		[M-H]-		679.076	ESI neg	1.968	2694492		2152159		607557		2258231		2689007		3020158		699930		2954302		1428145		1820184		1795851		399181		0	0	413861	832744
2.01_177.06		[M-H]-		177.056	ESI neg	2.012	2230608		1572325		1567428		1477613		2514473		1468701		2921421		1756846		575924		757234		1069612		860607		9747	12666	987565	550221
2.03_562.03		[M-H]-		562.03	ESI neg	2.034	564431		423264		249383		526454		281425		300900		241627		255901		206793		204237		367504		154341		9884	32742	742327	1170723
2.06_401.15		[M-H]-		401.145	ESI neg	2.055	1363116		1432478		1425480		664645		1225759		1421750		1551065		1474618		1200491		2060368		1207596		1822472		0	0	955268	523638
2.06_447.15		[M-H]-		447.151	ESI neg	2.059	1486042		1442540		1509689		732655		1236513		1518510		1587880		1561810		1303440		2248868		1273152		1914269		0	0	999104	530950
2.06_860.58		[M-H]-		860.584	ESI neg	2.062	808631		802249		901490		606719		969058		878189		913818		1079756		794190		1026405		1009011		926748		0	0	555871	256985
2.07_1103.09		[M-H]-		1103.09	ESI neg	2.066	7432372		5010935		7133044		4938675		7260828		6434196		7570676		6633442		4495509		5471225		7107338		5198744		0	3619	3422006	1766171
2.07_551.04		[M-H]-		551.039	ESI neg	2.067	35240104		27560382		29701158		28331052		31504742		29558546		30977206		30204064		23858940		26464094		31556874		23903370		243541	304713	26798534	18208202
2.07_752.12		[M-H]-		752.116	ESI neg	2.067	381728		326659		305070		151444		319323		348477		347341		279940		284459		434816		329018		275372		0	0	181502	44054
2.08_701.04		[M-H]-		701.036	ESI neg	2.085	693763		614948		627262		494137		558321		607902		498391		504625		520762		714655		798562		531350		3956	0	549803	324669
2.15_385.11		[M-H]-		385.114	ESI neg	2.145	489555		212138		365376		362809		394197		345911		558392		314210		178974		153326		196025		168332		0	0	148458	79650
2.16_595.20		[M-H]-		595.204	ESI neg	2.164	452169		361845		420011		277168		316610		470195		357450		471626		345437		370444		330010		482943		0	0	234533	120306
2.59_507.22		[M-H]-		507.224	ESI neg	2.588	335225		356780		435692		129833		475150		398849		402751		489081		247008		411542		298668		448997		0	0	153838	60840
2.83_273.17		[M-H]-		273.171	ESI neg	2.834	1281982		1360126		2521364		1083030		2801078		2850536		3606078		2094355		2912903		5007090		5191785		7607611		0	0	871281	355277
0.06_336.86		[M-H]-		336.859	ESI neg	0.064	661634		955334		700711		795441		505528		462995		538237		499318		1335082		518778		558007		477897		113405	614819	636334	490741
0.06_353.85		[M-H]-		353.849	ESI neg	0.063	105147		168816		122122		131207		91756		87426		113241		94774		235929		104388		98838		85726		8773	118791	111457	87743
0.07_326.83		[M-H]-		326.83	ESI neg	0.065	202604		372655		236742		281914		173410		169544		204236		185384		455876		182977		188240		151490		36531	226271	210240	157790
0.07_386.84		[M-H]-		386.841	ESI neg	0.065	137328		182680		128847		145069		102011		100657		121763		115497		260883		108964		106752		94440		12346	130106	134266	100553
0.09_308.86		[M-H]-		308.864	ESI neg	0.09	363511		512866		381980		398416		274718		244595		323565		282149		722203		276955		301708		246035		142255	326946	341682	270625
0.20_120.95		[M-H]-		120.955	ESI neg	0.2	160710		189294		147646		162238		184313		166343		151550		181777		158071		166282		174173		146185		22654	29160	174518	147420
0.20_177.97		[M-H]-		177.966	ESI neg	0.201	272829		283667		301559		241288		287273		268565		305386		307161		247982		281046		311662		249672		45565	50563	243081	218605
0.20_192.96		[M-H]-		192.959	ESI neg	0.198	311347		286634		295097		258695		303650		301475		311640		355767		217902		380461		381304		255517		72775	75137	246714	299806
0.20_261.95		[M-H]-		261.954	ESI neg	0.205	184057		171274		214916		98912		180517		220254		247044		194683		176719		261991		271165		205104		0	0	128120	52187
0.20_279.92		[M-H]-		279.92	ESI neg	0.201	406839		359676		375430		292965		457453		455389		366599		462663		319287		505616		484148		393664		4652	3228	342353	236937
0.20_289.95		[M-H]-		289.949	ESI neg	0.204	4511346		3823828		5036972		2153923		4454208		4603501		5254909		4859962		3895484		5730892		5827195		4765726		15368	26373	2883832	1184954
0.20_291.95		[M-H]-		291.947	ESI neg	0.205	1172105		991953		1406463		571648		1176762		1215642		1427279		1243737		1076151		1509528		1554382		1249202		2869	1923	792465	336070
0.20_294.88		[M-H]-		294.88	ESI neg	0.203	462349		658045		465980		526730		363997		357801		383272		449488		677683		433896		482259		269768		247865	128910	447734	239149
0.20_304.91		[M-H]-		304.909	ESI neg	0.204	1471138		2187352		1706443		1429181		1035776		1533103		1352105		1226738		2246313		1467340		1601497		1047924		1171872	546210	1244248	916352
0.20_322.94		[M-H]-		322.941	ESI neg	0.203	417711		359653		412905		292881		371718		428385		416662		460636		326434		513338		437334		430633		0	0	311833	175459
0.20_358.94		[M-H]-		358.944	ESI neg	0.203	151018		115850		200549		32560		144233		167392		230765		178963		171070		293267		254614		185759		0	0	62516	8327
0.20_360.94		[M-H]-		360.941	ESI neg	0.204	170816		125106		171699		57096		147175		154903		197046		163291		149064		236070		252714		193047		0	0	90657	9790
0.20_376.91		[M-H]-		376.91	ESI neg	0.204	316904		287037		327977		171992		374157		291732		331077		377371		295484		475757		483508		371682		48638	67670	198528	71154
0.20_392.89		[M-H]-		392.887	ESI neg	0.204	257663		170184		234783		164735		247173		338735		252397		248038		223384		217481		188407		207041		45456	45421	253726	131262
0.20_532.87		[M-H]-		532.875	ESI neg	0.205	345863		240774		438368		157042		295313		688215		466503		333522		400821		295210		231165		347396		4682	7791	307872	119012
0.20_534.87		[M-H]-		534.87	ESI neg	0.205	129225		114834		161132		69015		97149		245599		156558		121252		134368		132724		93846		131531		4566	5468	96826	43277
0.20_586.91		[M-H]-		586.905	ESI neg	0.204	126086		123466		189084		31118		144741		93267		179180		174650		116529		235219		274445		188250		0	0	44306	0
0.20_602.88		[M-H]-		602.883	ESI neg	0.205	129922		98541		177108		32735		155340		170675		226312		129571		171786		198928		132082		168133		0	0	75905	0
0.21_266.92		[M-H]-		266.925	ESI neg	0.206	254813		208155		278826		179200		279675		268237		296355		270921		223481		275520		317645		243934		5972	4173	145117	68436
0.21_272.87		[M-H]-		272.873	ESI neg	0.211	157315		149755		222835		85106		169797		183108		246006		181352		170700		244023		262643		207044		0	0	92766	38718
0.21_273.04		[M-H]-		273.04	ESI neg	0.209	136253		121869		256950		54573		179830		190235		239708		179998		168753		247465		245112		193107		0	0	76689	15069
0.21_276.91		[M-H]-		276.914	ESI neg	0.207	313143		350332		292358		278597		173028		192199		246992		222819		390567		244967		253640		188672		67889	44310	254857	123957
0.21_303.91		[M-H]-		303.912	ESI neg	0.207	113820		168402		155523		87573		109581		126768		112564		114240		161590		126846		138323		125914		19946	7673	124780	65265
0.21_340.95		[M-H]-		340.946	ESI neg	0.21	444993		404655		405148		352012		587227		479000		548159		521928		403954		498560		532934		493309		3771	5792	275974	162128
0.21_470.90		[M-H]-		470.902	ESI neg	0.211	290027		269494		398591		164535		402006		459103		434055		383534		292161		409590		405223		313994		0	0	186521	110305
0.21_486.88		[M-H]-		486.878	ESI neg	0.212	223642		215868		414101		117908		318902		472514		388234		309214		292883		290215		202587		306219		22930	13807	161683	87627
0.21_570.84		[M-H]-		570.841	ESI neg	0.214	150599		132041		245116		64242		145716		236294		293454		157957		169837		205218		107639		188262		20401	18250	82768	39146
0.22_244.94		[M-H]-		244.938	ESI neg	0.222	595671		713388		889694		352812		705228		597953		838222		780090		727294		970352		951596		852018		13132	9779	459740	179215
0.22_280.91		[M-H]-		280.908	ESI neg	0.221	891822		1264061		918909		2067743		1264204		816783		755732		1177294		992794		1223955		1090192		1280507		63305	46284	844492	489998
0.22_296.88		[M-H]-		296.882	ESI neg	0.223	1436921		2418500		2176157		1543650		1433731		989035		1197412		1907273		1750171		2784287		2098440		2395424		112813	82384	1453525	473827
0.22_312.92		[M-H]-		312.925	ESI neg	0.221	164130		173948		154712		190314		223201		187059		248335		213366		144719		179761		226507		236136		0	0	120614	66302
0.22_328.90		[M-H]-		328.899	ESI neg	0.221	467120		603605		706780		305594		591814		421527		688802		655589		594164		875050		820765		725626		72806	85070	386961	100390
0.22_342.88		[M-H]-		342.878	ESI neg	0.223	416716		444201		506890		442180		405616		543479		502936		416561		525017		443798		336165		483093		72577	24711	433350	339753
0.22_348.90		[M-H]-		348.896	ESI neg	0.224	204400		278430		139094		919918		423136		231776		192794		297250		223051		216602		221492		338713		16314	4666	176324	157967
0.22_396.89		[M-H]-		396.886	ESI neg	0.221	308358		325037		294873		368616		495700		305158		367154		408234		304579		347319		405771		416564		43885	81122	189170	97791
0.22_426.84		[M-H]-		426.84	ESI neg	0.221	329232		436392		413145		433408		327681		382839		362207		405502		392669		400293		300119		376222		10520	13745	400095	241622
0.22_432.86		[M-H]-		432.857	ESI neg	0.224	137516		162345		97803		582586		290671		138004		118657		164597		123275		170707		142379		213763		5435	20673	107188	79477
0.22_442.81		[M-H]-		442.813	ESI neg	0.223	122290		257631		128998		172260		60537		54162		71958		106201		190043		146676		117908		88664		17169	13790	248632	93796
0.22_448.83		[M-H]-		448.831	ESI neg	0.224	311210		505417		395143		734457		468707		284716		278249		432717		403685		522258		460134		510940		6409	5510	336496	119055
0.22_478.85		[M-H]-		478.85	ESI neg	0.222	262431		289394		320797		351432		403835		305877		366903		371476		303248		398754		391713		374056		47283	12896	214181	102295
0.22_508.87		[M-H]-		508.869	ESI neg	0.216	287448		209539		269085		186199		382227		286180		351724		279177		252395		284417		283597		253399		89108	78807	142433	54216
0.22_510.80		[M-H]-		510.801	ESI neg	0.223	133234		162869		198049		139824		106393		159159		117370		159597		188821		192367		90673		154556		5041	5878	152907	67665
0.22_532.79		[M-H]-		532.792	ESI neg	0.224	220641		370159		313460		441005		284877		170103		179871		297582		248841		403780		321095		381756		0	2240	202946	74100
0.22_540.82		[M-H]-		540.821	ESI neg	0.219	153658		156117		234718		91560		160706		233567		259581		192001		227937		201488		168022		187079		67081	43569	152851	74453
0.22_548.77		[M-H]-		548.766	ESI neg	0.224	184213		416583		367863		210798		154416		91714		149416		270776		246146		503465		341159		346121		0	0	209236	34929
0.22_562.81		[M-H]-		562.812	ESI neg	0.222	201320		226748		222783		238208		270679		194715		228919		260736		206747		290033		236381		261305		3350	2042	152235	67755
0.22_616.75		[M-H]-		616.754	ESI neg	0.224	120437		218587		144929		237133		113226		82536		86092		175894		145007		227294		170107		209950		0	0	100307	25558
0.22_632.73		[M-H]-		632.728	ESI neg	0.224	85334		187390		161865		80690		57920		32222		44056		125082		119177		206435		122444		159883		0	0	83286	5671
0.22_646.77		[M-H]-		646.774	ESI neg	0.222	130050		196779		158321		168945		215364		112725		149769		183242		170669		215200		207819		204409		0	0	114596	34704
0.22_662.75		[M-H]-		662.748	ESI neg	0.223	127803		205103		190449		113103		142366		95881		132169		187740		192828		277112		207298		237929		0	0	117721	21760
0.22_692.77		[M-H]-		692.768	ESI neg	0.22	88879		124777		150791		53221		105286		103157		148504		152735		138438		177778		146944		173307		0	0	66101	23063
0.23_145.95		[M-H]-		145.95	ESI neg	0.229	334708		442063		249791		390901		286513		269383		292092		335828		336344		471049		358807		346977		14088	49231	584269	501857
0.23_154.06		[M-H]-		154.062	ESI neg	0.231	944524		462511		949166		474624		931555		559245		829669		595918		572686		564065		600604		775777		75949	10413	278516	126383
0.23_173.10		[M-H]-		173.104	ESI neg	0.23	940562		372321		532438		1042148		1417738		651696		392603		71569		218046		272503		208747		193752		11140	9258	261138	119701
0.23_196.95		[M-H]-		196.947	ESI neg	0.226	379629		521141		399516		939050		633693		374978		378437		548130		466396		483861		501311		535414		21365	9139	382450	229689
0.23_212.92		[M-H]-		212.921	ESI neg	0.227	604553		960242		955271		646109		603374		434704		541669		827428		791293		1178847		900640		947423		6401	0	574288	207930
0.23_229.02		[M-H]-		229.023	ESI neg	0.233	348042		198541		387242		249117		297944		203122		280658		214097		231567		268150		182363		446287		0	0	167120	79724
0.23_284.13		[M-H]-		284.125	ESI neg	0.235	288786		312682		300471		256864		338146		353396		386155		296845		415149		500155		509668		532948		0	0	181570	106547
0.23_286.85		[M-H]-		286.854	ESI neg	0.23	157586		262099		251034		191718		148453		133266		153915		250006		165131		311780		248704		284151		7532	7610	195246	92853
0.23_298.88		[M-H]-		298.88	ESI neg	0.225	266502		476534		415690		331604		278021		183479		253384		382078		371570		614885		452894		500487		33942	45807	277847	113084
0.23_354.10		[M-H]-		354.104	ESI neg	0.235	230173		197078		172756		82925		261863		300229		216909		216610		188573		379996		231717		327063		0	0	215111	125583
0.23_358.85		[M-H]-		358.851	ESI neg	0.225	153173		286927		150184		220475		86159		85246		99241		146555		241840		168673		135928		124155		0	15207	305132	154299
0.23_464.80		[M-H]-		464.805	ESI neg	0.225	329395		660003		564037		348609		310133		187792		240710		445364		420943		769436		525614		622273		0	7287	361533	73394
0.23_516.16		[M-H]-		516.157	ESI neg	0.233	162114		87506		149953		87434		163858		227230		128223		197620		166211		222732		207657		191078		0	0	125746	90684
0.24_102.06		[M-H]-		102.056	ESI neg	0.244	368442		201491		407995		687051		757650		362433		229802		11021		149754		81844		113570		33960		6448	0	112929	65765
0.24_104.04		[M-H]-		104.035	ESI neg	0.236	1239294		409252		1535043		649102		1005559		723317		883185		793577		607528		601133		616225		993277		301682	221906	305575	153975
0.24_113.02		[M-H]-		113.024	ESI neg	0.243	1974876		1972270		6491816		1302568		2418079		3047126		2712039		4088322		3261315		3573233		3003095		3046447		116972	106892	1707757	959269
0.24_118.05		[M-H]-		118.051	ESI neg	0.241	979856		537783		1608063		512910		1067792		753329		805622		863215		848722		830013		820406		1483047		83276	20202	310036	129917
0.24_128.04		[M-H]-		128.035	ESI neg	0.245	530186		350453		549858		928280		856323		472756		363136		110341		235813		175162		230500		174622		11760	9768	190931	99653
0.24_131.05		[M-H]-		131.046	ESI neg	0.238	2687656		783911		1550491		802655		1851682		1396800		2252444		1311579		1037766		1315371		1157546		2077494		48359	9135	900500	472388
0.24_132.03		[M-H]-		132.03	ESI neg	0.242	2211558		703418		1421084		1438149		1736698		988264		896495		952022		489305		532867		623402		776021		330744	115645	503553	284552
0.24_142.99		[M-H]-		142.991	ESI neg	0.238	182679		191770		281423		90420		235553		270044		386879		316355		370690		452552		435884		511387		20585	44114	139613	3038
0.24_170.90		[M-H]-		170.902	ESI neg	0.237	250897		185220		267818		266256		287537		239933		247641		436982		155317		149150		158961		307194		5661	3076	88470	52537
0.24_180.93		[M-H]-		180.931	ESI neg	0.236	377955		467831		615960		286210		537862		433238		489165		727871		424598		611434		508529		714624		3030	2808	263665	139369
0.24_184.07		[M-H]-		184.075	ESI neg	0.239	201324		153313		94041		142364		155332		249382		265955		245525		131643		217903		218778		277219		0	0	142884	109285
0.24_194.10		[M-H]-		194.103	ESI neg	0.236	677050		781021		574652		513783		746546		869553		868557		671788		837611		1397127		1141229		1037793		0	0	765019	543584
0.24_197.07		[M-H]-		197.067	ESI neg	0.242	73871		132184		40202		38778		71960		44382		93055		74764		95169		143129		182493		169325		0	0	73914	38026
0.24_210.07		[M-H]-		210.065	ESI neg	0.244	483292		145892		310505		116529		223273		301878		356103		300689		86103		108986		145739		143473		0	0	77401	53090
0.24_214.05		[M-H]-		214.049	ESI neg	0.24	592669		385066		516461		1175128		1003275		586152		420500		41929		281941		204007		251323		181436		0	5443	194906	112869
0.24_214.97		[M-H]-		214.972	ESI neg	0.242	250204		84285		851918		154293		257445		366799		298825		434104		163738		149446		129716		192421		0	1974	84080	39565
0.24_225.06		[M-H]-		225.062	ESI neg	0.241	15584351		13046488		26037746		9501691		16731855		17211886		16420191		20649394		17116378		20583026		17961796		20138786		181302	68230	10579932	6401310
0.24_227.08		[M-H]-		227.077	ESI neg	0.243	684454		1033228		953732		495667		940674		951436		1145496		980466		1141409		1786879		1473056		1753029		32376	5078	591424	300116
0.24_228.06		[M-H]-		228.064	ESI neg	0.243	220812		140366		311616		310730		234522		442807		441977		468921		308776		423849		269065		399963		15126	15146	167192	169420
0.24_239.08		[M-H]-		239.077	ESI neg	0.245	1026479		1056434		1241062		567681		1166078		1344866		1336561		1306368		1138578		1596946		1695302		1654838		0	0	631822	299951
0.24_241.09		[M-H]-		241.093	ESI neg	0.239	215486		226888		190271		274876		430639		282049		245002		230351		385089		675097		584946		529458		3933	2541	141868	68706
0.24_259.02		[M-H]-		259.022	ESI neg	0.242	248496		107206		667706		283658		300674		423161		369307		557626		366862		467238		435496		481400		0	0	134081	81516
0.24_269.09		[M-H]-		269.088	ESI neg	0.241	1124513		1408176		1644216		764483		1394049		1645111		1599640		1913985		2311707		3300415		2718258		2762565		0	3024	1128036	519673
0.24_284.10		[M-H]-		284.099	ESI neg	0.238	750601		207784		1820614		312503		701309		575860		498939		689540		424024		388449		392329		675290		0	0	127926	39959
0.24_298.11		[M-H]-		298.114	ESI neg	0.241	920797		391259		2346084		371031		1160305		888725		744894		958817		958158		871298		785774		1451968		0	0	205461	48378
0.24_302.10		[M-H]-		302.101	ESI neg	0.242	774715		943433		705751		1639730		1609811		797888		568728		267938		552223		479557		483054		384481		0	2758	401681	247091
0.24_302.14		[M-H]-		302.136	ESI neg	0.238	687221		762351		652954		664370		901084		859425		846975		729247		1223644		1127310		1429091		1310951		0	0	429026	274399
0.24_307.08		[M-H]-		307.084	ESI neg	0.243	34419		68647		77885		41700		46489		29396		48884		87294		107629		154304		205601		103988		0	0	34495	6113
0.24_309.02		[M-H]-		309.023	ESI neg	0.237	144382		263991		359744		112127		193575		170009		137437		239515		246740		365320		279976		264773		0	0	185143	80995
0.24_321.02		[M-H]-		321.023	ESI neg	0.245	101695		148501		52392		0		135028		107079		104099		104434		76329		170727		154285		87767		0	0	96483	34926
0.24_333.06		[M-H]-		333.059	ESI neg	0.243	1078356		805338		1521911		1718617		2473437		1472039		1427052		524448		837298		850849		780194		828026		0	0	468438	216680
0.24_354.15		[M-H]-		354.152	ESI neg	0.244	648311		170770		2094942		110303		362586		405615		465282		902591		323975		254208		137535		320398		0	0	190910	76643
0.24_633.13		[M-H]-		633.129	ESI neg	0.24	152456		216416		191432		174327		188343		139655		70520		242929		479231		612309		643225		421422		0	0	157117	59032
0.25_119.03		[M-H]-		119.035	ESI neg	0.249	1865088		2117825		4854902		1095764		2433358		2718821		2709605		3433130		3196378		3560153		3200376		3172382		27768	93440	1604765	904044
0.25_127.00		[M-H]-		127.004	ESI neg	0.254	361401		364558		488126		243454		427752		497598		463980		595821		473928		688931		684192		743442		8792	38176	222791	120557
0.25_131.08		[M-H]-		131.083	ESI neg	0.246	4048774		1216777		3905794		986421		1531266		1849489		2133287		2449454		1146634		957204		736238		1482404		32418	13604	1104491	626156
0.25_149.05		[M-H]-		149.046	ESI neg	0.25	1143647		1189322		2319804		665627		1325453		1408923		1560305		1679466		1620164		1889977		1803380		1837495		5704	31059	1037061	577981
0.25_151.06		[M-H]-		151.061	ESI neg	0.246	196833		299945		116999		119842		247873		199534		267434		184929		267830		373529		416895		386087		0	0	218280	116435
0.25_161.05		[M-H]-		161.046	ESI neg	0.246	1904121		1958766		6655506		1347630		2464161		3260998		2678317		4437472		3443148		3687176		3060442		3154477		152926	131662	1771786	1049225
0.25_185.02		[M-H]-		185.022	ESI neg	0.251	121575		107419		20244		101072		150627		77909		134360		75427		68641		52691		169220		110011		5460	7814	171470	90265
0.25_193.04		[M-H]-		193.035	ESI neg	0.25	1924535		1686794		3695953		584829		1920052		2042951		2123726		3198043		2076278		2139092		2080546		2437121		81052	20757	1185832	503934
0.25_202.07		[M-H]-		202.072	ESI neg	0.251	233817		197285		355865		124524		340829		284899		383035		484274		446682		400750		468932		565539		0	0	193599	86645
0.25_209.07		[M-H]-		209.067	ESI neg	0.254	1417253		1441375		1390502		615752		1501626		2035526		2480130		1695534		1496216		1756372		2295588		2106647		3086	5582	870582	414508
0.25_223.05		[M-H]-		223.046	ESI neg	0.254	5984776		2869554		7495709		1852779		6148962		9456635		11897246		6832619		5823790		6507536		6983445		9193173		3756	8019	2901228	1020469
0.25_242.05		[M-H]-		242.052	ESI neg	0.25	2971869		1779640		8457461		1920331		3266337		4689629		3401430		6056909		5398836		3915067		3204430		3684195		10410	0	2581032	1973691
0.25_244.07		[M-H]-		244.067	ESI neg	0.249	349219		237605		237172		162794		346130		353958		419767		357122		481714		465891		420295		536616		4817	0	261827	239727
0.25_255.07		[M-H]-		255.072	ESI neg	0.253	173744		241796		385048		75061		182966		336755		370432		454144		342496		394688		437581		478319		2976	0	190330	108399
0.25_258.06		[M-H]-		258.056	ESI neg	0.253	1302171		923564		1713574		528849		1389189		1490366		2120579		1982682		1283997		1641415		1780888		2404860		0	0	652781	217767
0.25_272.06		[M-H]-		272.062	ESI neg	0.254	1587708		1120523		861648		705588		1380867		1997114		2280186		1673472		1430350		1400271		1869742		1787361		0	0	953250	486409
0.25_275.05		[M-H]-		275.054	ESI neg	0.248	2954040		1368121		3571570		1595550		2959359		3666127		4119392		3530089		1667384		1710821		2426943		2968456		0	0	880330	342307
0.25_277.03		[M-H]-		277.033	ESI neg	0.247	1850162		1029495		6022345		859634		2419394		3020146		2594128		4756412		2516418		2097172		1722581		2814783		0	0	913418	411757
0.25_285.08		[M-H]-		285.083	ESI neg	0.253	168980		147774		447774		81431		179315		206307		226180		360633		361515		440612		389305		439058		0	0	158882	64390
0.25_291.05		[M-H]-		291.049	ESI neg	0.247	226882		132800		621380		70553		205325		405829		275120		494288		247393		322111		290161		227568		0	0	105110	28955
0.25_300.05		[M-H]-		300.049	ESI neg	0.249	121120		54391		51941		79218		96938		176042		143364		232751		167918		212061		199124		344323		0	0	129870	58265
0.25_302.07		[M-H]-		302.073	ESI neg	0.253	831867		615497		678055		390230		776455		900450		940731		994949		919401		997641		1032662		1075792		0	0	528601	349778
0.25_315.09		[M-H]-		315.093	ESI neg	0.249	115365		159862		827940		94004		263208		269119		235289		404043		326649		383842		404745		509692		0	0	158216	32256
0.25_323.08		[M-H]-		323.079	ESI neg	0.252	207137		35068		332696		125610		286514		317405		249783		366539		119068		108285		132789		237168		0	0	66069	0
0.25_325.12		[M-H]-		325.125	ESI neg	0.249	709243		258117		1886172		351625		826685		566907		625928		707953		613775		459947		380883		993468		0	0	189008	57597
0.25_332.08		[M-H]-		332.084	ESI neg	0.248	354056		300419		257979		170550		360938		368462		444728		573529		799305		782167		735544		720830		0	0	321022	224622
0.25_337.09		[M-H]-		337.095	ESI neg	0.247	121408		235818		79196		75471		238090		146451		201659		206342		268575		352981		407841		402259		0	0	226551	44548
0.25_345.10		[M-H]-		345.104	ESI neg	0.251	48872		70558		327398		32930		133056		185142		244849		206563		193877		154761		239792		293688		3192	0	101897	6917
0.25_353.07		[M-H]-		353.073	ESI neg	0.254	102480		204748		124317		68599		183092		203346		275925		362827		271149		445830		386190		450496		0	0	98242	42457
0.25_355.09		[M-H]-		355.088	ESI neg	0.248	785732		580300		1250201		465308		688345		1296788		1257132		1359784		787408		1269787		1113364		1328644		0	0	504612	267748
0.25_356.12		[M-H]-		356.12	ESI neg	0.252	81505		72687		55593		36946		154571		47542		134217		54459		100873		164811		145903		257785		0	0	62216	0
0.25_369.12		[M-H]-		369.121	ESI neg	0.247	327746		176945		431200		151375		363096		418000		455643		482732		325385		379389		381205		665019		0	0	138365	35397
0.25_371.08		[M-H]-		371.083	ESI neg	0.253	331646		449697		806461		165366		448880		793158		568752		837292		354671		663898		453633		719756		0	0	198921	85024
0.25_386.13		[M-H]-		386.131	ESI neg	0.25	48480		34883		56803		34555		140313		76382		51012		31983		104395		96021		157797		211289		0	0	47725	5974
0.25_397.12		[M-H]-		397.116	ESI neg	0.248	417089		192364		222703		130112		511132		821833		993186		614885		319710		296632		467670		529218		0	0	107227	5533
0.25_451.12		[M-H]-		451.123	ESI neg	0.253	354208		124262		467266		374018		287067		452121		478237		448485		270061		305993		382710		506469		0	0	126831	40097
0.25_517.14		[M-H]-		517.141	ESI neg	0.252	526852		380257		521040		233277		496065		822873		710079		886520		634354		840459		778460		947000		0	0	391786	212073
0.25_85.03		[M-H]-		85.0295	ESI neg	0.251	430389		385674		951417		222503		490813		672218		708746		823882		654152		758254		624190		781992		53487	100893	275406	194644
0.25_89.02		[M-H]-		89.0244	ESI neg	0.247	4156239		4115060		13290888		2918958		5060138		6579962		5614914		8497614		6841853		7570622		6077744		6508668		669802	2641416	3751576	2282618
0.26_110.98		[M-H]-		110.976	ESI neg	0.264	721427		631345		848917		553447		896121		895501		1053173		1446076		780822		958704		2360713		956353		472509	452110	558959	185320
0.26_124.99		[M-H]-		124.988	ESI neg	0.255	872316		1390908		1147714		688714		1455514		1166943		1724348		1877643		1589013		2543974		2079919		2878376		9784	4346	966898	152905
0.26_129.02		[M-H]-		129.019	ESI neg	0.258	766657		587108		1045945		363304		907478		990476		1145207		1082108		810364		1011627		966978		1061317		111341	144261	496082	226876
0.26_147.03		[M-H]-		147.03	ESI neg	0.263	334868		340500		471518		508125		463079		602277		692242		650623		635166		726306		789482		912120		65352	74861	308373	142136
0.26_149.01		[M-H]-		149.009	ESI neg	0.259	442516		340848		649138		200352		631356		404768		740330		934284		373228		351994		753468		677362		0	30618	259606	89649
0.26_159.03		[M-H]-		159.03	ESI neg	0.259	221643		216043		253579		116716		219288		227716		305303		272960		220368		274750		297467		249204		3401	23128	152181	68145
0.26_170.99		[M-H]-		170.994	ESI neg	0.259	171817		148946		404689		180470		196543		234881		242783		224700		453292		423211		286225		308138		0	2509	78854	34174
0.26_177.04		[M-H]-		177.041	ESI neg	0.259	298083		296872		458141		104377		206952		290733		386345		431479		316552		356204		363293		397719		26536	33821	214650	83773
0.26_213.02		[M-H]-		213.017	ESI neg	0.263	330698		223140		363630		123345		204462		300791		540289		540473		260570		277038		342530		395359		51541	18084	128899	53539
0.26_220.08		[M-H]-		220.083	ESI neg	0.257	232905		470391		427055		117107		312003		322427		475081		587462		679428		855352		790593		968764		3843	0	324901	154391
0.26_262.06		[M-H]-		262.057	ESI neg	0.261	1973123		2122102		3564935		3462042		2469000		1928896		1617062		2317624		1268012		1833360		2167099		2436703		0	0	1328303	636065
0.26_266.09		[M-H]-		266.088	ESI neg	0.256	792549		1428462		1212877		350364		1033989		1074664		1316823		1618953		2079099		2723339		2355681		2876708		0	0	968224	478471
0.26_267.07		[M-H]-		267.072	ESI neg	0.257	12160628		10328430		14548957		3975848		11223983		16760010		16062142		23198152		14955371		20860114		15762896		23060690		38278	52513	10111325	5051174
0.26_283.08		[M-H]-		283.078	ESI neg	0.258	2474452		2571056		1832536		1170170		2607625		2628060		3002863		3649571		4642886		5471808		4967476		5679964		0	0	2747624	1248229
0.26_289.07		[M-H]-		289.07	ESI neg	0.255	274078		203353		258909		93184		185369		311207		392748		398717		278268		385020		437111		421577		0	0	71020	30588
0.26_297.08		[M-H]-		297.083	ESI neg	0.258	376243		307479		702761		656752		549057		486250		453122		490368		416432		568808		542687		576293		0	2103	200542	80925
0.26_299.10		[M-H]-		299.098	ESI neg	0.262	569459		709119		534445		194142		348555		743576		768077		1046308		902603		1422171		1089259		1512185		0	0	402495	222241
0.26_325.08		[M-H]-		325.078	ESI neg	0.259	226806		157197		379208		68696		181607		295442		360185		439827		293254		466593		400949		396529		0	0	191552	83310
0.26_326.11		[M-H]-		326.109	ESI neg	0.255	69889		69631		214463		101982		225832		129900		32539		42503		81644		200527		104738		192737		0	0	43377	6605
0.26_335.05		[M-H]-		335.047	ESI neg	0.257	84181		67332		41301		5680		105003		151186		191241		193622		45259		246587		166068		244929		0	0	66336	27657
0.26_351.00		[M-H]-		351	ESI neg	0.263	12834		71333		34162		0		16501		47827		31906		35197		29582		43726		20450		68361		0	10824	156658	15001
0.26_351.03		[M-H]-		351.034	ESI neg	0.256	104835		221430		26156		16194		64443		178712		128710		251712		231292		456892		286896		356030		0	0	174524	81114
0.26_365.05		[M-H]-		365.049	ESI neg	0.255	200895		145972		141168		20929		298101		564622		416551		706516		278316		389159		273696		595417		0	0	159490	61595
0.26_374.09		[M-H]-		374.094	ESI neg	0.264	318643		437786		260702		131170		278050		398173		377104		656475		906436		926014		808780		706920		0	0	399465	198246
0.26_379.08		[M-H]-		379.082	ESI neg	0.264	9521755		5754609		13732981		14001146		11766176		8966806		7384640		3886262		4282721		3029815		3979400		2940423		102140	20740	3043692	1706632
0.26_383.12		[M-H]-		383.119	ESI neg	0.256	71534		78785		19880		43265		61325		104023		77418		297014		210113		396500		256101		390057		0	0	98609	49674
0.26_391.06		[M-H]-		391.065	ESI neg	0.261	311091		368903		161102		29788		913342		4978428		1252547		2953968		12790		0		0		6569		0	0	406560	157486
0.26_407.10		[M-H]-		407.096	ESI neg	0.261	230847		165886		359345		76190		110420		181780		286336		575803		464637		444850		610918		649058		0	0	152363	71350
0.26_434.12		[M-H]-		434.115	ESI neg	0.264	23633		87537		66273		20080		0		40878		28444		243063		322153		275346		262106		274819		0	0	130916	74843
0.26_437.10		[M-H]-		437.097	ESI neg	0.262	914042		833235		1051089		1718484		1863312		1024028		769726		397274		632549		294318		772860		247232		16416	0	203200	46774
0.26_439.09		[M-H]-		439.086	ESI neg	0.264	4354947		2466752		7091590		3476926		5808818		4104229		3842686		2668333		2705856		1954019		2191707		2180763		3423	0	1159600	533266
0.26_447.14		[M-H]-		447.136	ESI neg	0.263	465887		565397		1285970		765244		922253		782415		657688		543098		622134		608122		531490		540656		0	0	338483	68059
0.26_453.09		[M-H]-		453.091	ESI neg	0.259	298101		19192		473709		386357		224958		121264		196453		182225		174123		45665		230452		43220		0	0	29469	3479
0.26_461.05		[M-H]-		461.048	ESI neg	0.255	511858		456518		630481		500210		373276		491282		307504		481342		456256		466251		551669		457759		0	0	225976	94274
0.26_461.15		[M-H]-		461.151	ESI neg	0.256	617816		406005		638232		473729		534867		832670		806562		1123090		712967		958297		883848		1576803		0	0	461950	268359
0.26_471.08		[M-H]-		471.077	ESI neg	0.258	1057554		1485961		1287264		1104110		878554		907784		719165		1018591		1371601		1728486		1647415		1311676		0	0	757875	335895
0.26_477.15		[M-H]-		477.146	ESI neg	0.261	425359		470753		1044378		887056		820085		631575		534671		362873		440150		418614		545218		419145		0	0	269983	18435
0.26_488.16		[M-H]-		488.162	ESI neg	0.257	893421		520356		1189607		2031302		1965871		839667		492562		196022		421493		362632		379621		433244		0	0	168219	25100
0.26_503.16		[M-H]-		503.162	ESI neg	0.256	714251		665005		914641		893851		903856		983550		623311		1514386		1273897		1602301		1642252		2317898		0	0	509496	282606
0.26_507.16		[M-H]-		507.157	ESI neg	0.26	400166		318713		850172		504079		799287		539467		492888		287172		455829		375747		524339		363572		0	0	261035	33209
0.26_513.05		[M-H]-		513.052	ESI neg	0.262	42839		172471		0		8759		24562		19860		11093		99649		24680		37640		65275		34471		0	0	730131	170888
0.26_516.20		[M-H]-		516.205	ESI neg	0.257	1306137		336171		2036341		348137		638357		511172		560652		570884		322965		193049		137295		288781		0	0	152586	16290
0.26_535.15		[M-H]-		535.153	ESI neg	0.26	273615		244389		554507		98507		375121		350579		364481		374340		254612		280766		266657		480024		0	0	128257	26654
0.26_537.17		[M-H]-		537.167	ESI neg	0.261	791727		417381		1130506		571453		982666		508388		542612		264960		424331		289541		236713		267676		0	0	148420	12485
0.26_539.14		[M-H]-		539.139	ESI neg	0.256	2066128		1444306		2675852		2430858		2219767		2281698		1821541		3056719		2173632		2125723		2919841		3489613		14303	0	736528	337836
0.26_541.13		[M-H]-		541.135	ESI neg	0.259	703768		482444		806281		732107		739402		737154		522048		970976		693284		648363		906985		1073809		0	0	226269	103098
0.26_566.16		[M-H]-		566.157	ESI neg	0.264	554334		712692		670325		772029		601129		671329		416890		656463		955593		781202		903724		918614		0	0	421541	199295
0.26_579.18		[M-H]-		579.178	ESI neg	0.262	1745309		1072639		2115589		725700		2203286		1992676		1729568		782524		835794		845778		1053144		647688		0	0	348677	61656
0.26_601.14		[M-H]-		601.139	ESI neg	0.255	399384		281695		734725		259750		549063		422646		409390		879552		567885		513624		604974		966863		0	0	109696	16519
0.26_609.19		[M-H]-		609.189	ESI neg	0.264	3658614		2857411		5625132		2538300		5673855		5144449		3839549		1635708		2714020		2186600		2159656		1889660		0	0	1215329	246864
0.26_613.10		[M-H]-		613.105	ESI neg	0.255	227841		116342		118091		30766		105378		212733		189640		199061		134896		270753		209142		179477		0	0	94387	45057
0.26_633.24		[M-H]-		633.236	ESI neg	0.258	0		0		0		0		455028		1271975		237660		644606		0		0		0		0		0	0	36768	0
0.26_771.24		[M-H]-		771.242	ESI neg	0.26	163431		167686		293708		56223		272409		242674		170077		334007		289954		334486		278963		527923		0	0	41302	7298
0.27_144.03		[M-H]-		144.03	ESI neg	0.268	499417		422757		774319		91342		402953		425426		358407		936862		475652		597593		593948		541384		3996	6284	303972	186306
0.27_163.02		[M-H]-		163.025	ESI neg	0.267	122808		72919		239728		69583		144096		203227		298955		207347		260859		254065		296050		322464		4545	13296	65562	37834
0.27_201.05		[M-H]-		201.054	ESI neg	0.272	541156		676042		609667		342528		519568		343631		645580		895419		465445		829666		934128		1472720		0	0	368812	197109
0.27_202.04		[M-H]-		202.036	ESI neg	0.266	132140		133037		235818		194098		232579		198666		210806		200945		184073		245753		271119		262926		0	0	64796	23492
0.27_205.04		[M-H]-		205.035	ESI neg	0.273	20390420		15649123		32828456		5327939		19474312		29252998		34270272		27901704		23448042		29994536		28511944		36656396		6262	10291	9226678	3439145
0.27_227.00		[M-H]-		226.996	ESI neg	0.268	300468		180441		438006		283200		222569		654300		695638		759790		574020		696083		623817		790849		0	0	124071	38645
0.27_236.02		[M-H]-		236.023	ESI neg	0.267	469527		431849		1031949		186236		887520		1164592		855754		1000596		1148072		1395686		1143194		2018493		0	3298	474770	178454
0.27_240.04		[M-H]-		240.036	ESI neg	0.266	65972		109975		0		0		17217		68732		106975		198019		146752		149536		101904		158774		0	0	118825	44183
0.27_254.02		[M-H]-		254.016	ESI neg	0.271	301319		180172		216249		249326		188962		631872		553142		605416		695215		791845		571277		696634		0	0	290592	115652
0.27_371.03		[M-H]-		371.026	ESI neg	0.265	839901		946810		1083706		421406		946938		1367926		1566214		1795398		1445543		2086367		1870247		2159372		0	0	447602	84249
0.27_371.12		[M-H]-		371.119	ESI neg	0.274	624919		622019		722745		323656		435343		683752		524201		935564		1226559		1339992		1191290		1173932		0	0	488193	287458
0.27_375.11		[M-H]-		375.115	ESI neg	0.265	49464		38659		76459		0		103818		105086		152770		134552		86620		116737		137162		204146		0	0	44321	0
0.27_386.98		[M-H]-		386.975	ESI neg	0.267	317789		339958		419583		464824		537299		453102		310707		66804		126364		139800		130023		73091		0	0	200298	124372
0.27_387.25		[M-H]-		387.253	ESI neg	0.267	356660		212560		439603		722830		472716		306844		267283		30626		172727		114450		74989		41917		0	0	204700	102657
0.27_417.13		[M-H]-		417.125	ESI neg	0.265	764828		1165916		1531360		798183		849947		1072682		904311		1709804		1737994		2059547		2014136		2356772		0	0	980605	529445
0.27_426.13		[M-H]-		426.125	ESI neg	0.268	58476		64145		100461		0		120661		123252		184405		124790		141968		243681		187841		264791		0	0	6494	0
0.27_441.03		[M-H]-		441.034	ESI neg	0.27	649588		693670		262380		464598		187088		418536		379339		140109		449749		237417		205317		174673		25558	6583	1271661	939188
0.27_453.07		[M-H]-		453.074	ESI neg	0.271	280206		341579		240791		591894		520704		583197		361448		95554		185304		162552		184521		150634		0	0	90915	11856
0.27_455.09		[M-H]-		455.087	ESI neg	0.266	106735		234112		195100		34844		151948		124284		303412		84269		143064		145834		202215		104385		0	0	58884	5391
0.27_455.10		[M-H]-		455.102	ESI neg	0.266	579391		501568		309248		738333		485759		570841		308286		166311		346910		336780		320927		214568		21495	2429	838051	897074
0.27_485.12		[M-H]-		485.115	ESI neg	0.269	206243		216061		217233		233427		375150		349201		360236		136426		178674		208126		178052		244666		0	0	106270	33634
0.27_486.15		[M-H]-		486.147	ESI neg	0.27	212245		143462		480708		103694		388803		260600		175160		84587		100863		82433		98137		73028		0	0	60594	14508
0.27_491.16		[M-H]-		491.162	ESI neg	0.267	206033		138498		255552		255934		364217		265633		242475		23816		48427		46472		29601		87055		0	0	76899	8425
0.27_503.13		[M-H]-		503.126	ESI neg	0.268	155609		120676		180590		33057		235029		209552		177645		62709		85501		94092		113753		114561		0	0	68141	3510
0.27_521.17		[M-H]-		521.172	ESI neg	0.27	204188		202012		216385		197202		350804		182507		205260		31485		70076		36172		30144		106249		0	0	39878	7139
0.27_533.14		[M-H]-		533.136	ESI neg	0.266	766098		624719		1073562		680529		1181959		1065718		913788		251889		583767		450559		605688		377347		0	0	167347	18331
0.27_533.17		[M-H]-		533.173	ESI neg	0.267	156964		218150		215735		146171		211705		121068		101463		16369		137740		99485		110703		83115		0	0	104456	6752
0.27_547.15		[M-H]-		547.152	ESI neg	0.271	4393794		3048327		5416074		2320148		6102612		7121828		7147907		1408083		2320932		2302078		2190394		2909588		0	0	1449772	338585
0.27_563.15		[M-H]-		563.147	ESI neg	0.265	354996		207082		372556		193277		444625		384275		389033		84061		150873		116825		187746		85557		0	0	117773	4954
0.27_591.18		[M-H]-		591.178	ESI neg	0.274	23584		84859		74223		0		24369		174280		114289		203083		183315		316644		196560		281309		0	0	111878	50909
0.27_604.17		[M-H]-		604.173	ESI neg	0.265	1275030		1200363		2586434		4141212		2449544		1198845		748685		290668		383202		337301		527986		328538		0	0	326042	69384
0.27_665.21		[M-H]-		665.215	ESI neg	0.268	195834		237158		211873		375688		242549		330942		162904		329648		225441		289679		280669		424338		0	0	127616	97250
0.27_701.19		[M-H]-		701.192	ESI neg	0.266	617408		421406		444362		769404		493468		522415		325104		526832		383634		369179		467018		517946		0	0	199733	98546
0.27_709.21		[M-H]-		709.205	ESI neg	0.274	214532		212321		295872		58855		272820		468262		326324		208807		192923		231907		268932		321597		0	0	65086	3979
0.27_711.22		[M-H]-		711.221	ESI neg	0.266	928160		1131490		989434		1470781		999040		1396839		753209		1288406		950206		1302061		1128564		1728148		5804	0	647946	435947
0.27_729.23		[M-H]-		729.231	ESI neg	0.267	1229210		1091263		1956967		4824772		3225724		1776038		1263372		23202		293506		111607		165186		51441		0	0	464219	132037
0.27_781.20		[M-H]-		781.203	ESI neg	0.265	487452		240200		838795		567407		833335		484208		418386		18392		113020		0		76540		19808		0	0	82042	15281
0.27_845.28		[M-H]-		845.278	ESI neg	0.268	257687		366224		585671		955898		707183		481242		238982		12375		129804		99445		117534		50669		0	0	80950	4403
0.27_98.95		[M-H]-		98.9491	ESI neg	0.268	27527		41023		36135		61268		89863		28573		42111		138728		7823		30971		54363		38365		141501	151600	121464	57079
0.27_99.01		[M-H]-		99.0088	ESI neg	0.272	241004		257163		433209		127859		272197		377660		436107		426632		400438		540170		451593		534863		38064	56519	204532	81616
0.28_115.00		[M-H]-		115.004	ESI neg	0.285	4699422		1626330		13825755		3693256		4697326		5304192		6229572		6817352		2967410		2975106		4021846		3652701		112119	68724	1476760	510435
0.28_135.97		[M-H]-		135.971	ESI neg	0.276	197227		314093		152687		203848		506791		295386		246009		391819		648804		326642		1242964		366134		125880	122941	130121	3515
0.28_191.06		[M-H]-		191.056	ESI neg	0.276	512825		578371		959980		38768		210865		657528		752733		785944		581564		616746		693708		929876		27481	26202	689279	331346
0.28_222.91		[M-H]-		222.91	ESI neg	0.284	543537		176473		238932		389220		123833		206475		239981		302388		208050		96582		145464		96171		35967	33982	594522	290642
0.28_232.94		[M-H]-		232.939	ESI neg	0.284	416484		165691		128528		146745		84360		171664		167563		267128		214001		147117		187686		118674		44106	42428	768854	430479
0.28_289.02		[M-H]-		289.018	ESI neg	0.285	445900		44213		415240		175540		112222		377663		319226		523097		68651		54197		111614		117097		0	0	203825	64837
0.28_290.10		[M-H]-		290.099	ESI neg	0.28	98235		112679		169929		52058		309444		128552		28361		117883		836957		1025950		843589		706714		0	0	183164	83096
0.28_304.99		[M-H]-		304.992	ESI neg	0.277	388590		42336		676948		125190		101256		235981		262189		462872		63434		77053		131517		127312		0	0	79135	5054
0.28_327.09		[M-H]-		327.093	ESI neg	0.275	273791		207959		334325		66748		239742		319443		380601		337126		264374		337275		334551		342081		0	0	145999	49817
0.28_339.06		[M-H]-		339.057	ESI neg	0.283	355933		112637		736465		82832		369625		471813		630869		457243		305615		309582		370940		352430		0	0	40263	0
0.28_361.04		[M-H]-		361.041	ESI neg	0.282	170681		98827		118730		64755		257302		199860		228559		239855		177882		235361		316480		222426		0	0	67651	11204
0.28_411.08		[M-H]-		411.078	ESI neg	0.275	332783		176802		401173		8773		330824		540587		796694		499220		438455		539366		585389		918529		0	0	36225	57147
0.28_445.12		[M-H]-		445.12	ESI neg	0.275	286165		289635		426739		227387		412173		386234		455287		261956		246589		293464		224883		348905		0	0	142172	32504
0.28_469.12		[M-H]-		469.12	ESI neg	0.285	705517		435431		1029714		349021		525876		585333		789794		560980		465016		450729		706926		445384		0	0	208585	39562
0.28_471.14		[M-H]-		471.135	ESI neg	0.277	647564		756600		632999		236615		700530		957011		802507		991562		979880		1460412		982344		1269963		0	0	601925	302631
0.28_473.15		[M-H]-		473.151	ESI neg	0.285	769380		818580		574237		258470		749866		1144778		771309		915034		1078934		1458477		1271444		1022237		0	0	611100	299586
0.28_475.13		[M-H]-		475.13	ESI neg	0.281	4320300		1496672		7826816		7289390		5788266		4542946		3690658		1127202		1201992		904029		1046831		1037255		0	0	951188	329546
0.28_485.15		[M-H]-		485.151	ESI neg	0.277	143440		242848		84430		11551		89598		224079		142668		339835		239223		485673		339557		431341		0	1879	178460	119960
0.28_519.16		[M-H]-		519.156	ESI neg	0.275	198345		141205		92491		75986		154590		248854		204384		229101		300298		409104		350612		347017		0	0	95522	50959
0.28_605.16		[M-H]-		605.157	ESI neg	0.28	86403		59973		17287		0		0		221340		260869		267250		111196		215809		176355		324951		0	0	108379	66236
0.28_605.19		[M-H]-		605.194	ESI neg	0.283	628618		798791		730294		218495		715796		728701		637418		252895		931585		1449795		1161557		202227		0	0	255885	315866
0.28_637.18		[M-H]-		637.184	ESI neg	0.281	444708		210429		1291788		609086		627399		824191		703766		1100276		310900		367469		420445		650633		0	0	233899	64989
0.29_161.01		[M-H]-		161.009	ESI neg	0.287	373200		491637		697365		173171		485279		481363		647280		580311		570411		766118		685343		728819		0	2198	218817	44138
0.29_169.01		[M-H]-		169.014	ESI neg	0.292	100823		140743		256727		336981		531542		59512		21800		154824		138878		119436		110553		100977		253334	209974	123906	123056
0.29_207.02		[M-H]-		207.016	ESI neg	0.289	175889		153800		226354		176167		261331		244560		239797		178823		203320		175720		137867		170690		0	0	105883	0
0.29_232.05		[M-H]-		232.046	ESI neg	0.288	172312		101101		237854		97884		201585		136562		287744		215260		183896		197219		188466		295404		0	0	42410	3140
0.29_237.01		[M-H]-		237.007	ESI neg	0.295	16681		79652		301485		30366		214432		162829		169013		238369		179783		254567		227037		500533		0	0	4886	0
0.29_252.07		[M-H]-		252.074	ESI neg	0.29	191010		188987		46362		75575		166693		195149		180904		25020		193909		225581		188441		105372		0	0	128031	72274
0.29_281.09		[M-H]-		281.088	ESI neg	0.289	553338		497215		312473		225393		541735		476166		437428		413372		660310		781777		689377		507945		0	0	513555	359155
0.29_295.07		[M-H]-		295.067	ESI neg	0.288	745231		789978		1547052		495853		1098664		1133655		1202915		1052433		1814292		2097293		1921288		1563117		0	0	457957	198347
0.29_307.07		[M-H]-		307.067	ESI neg	0.292	178201		156530		147587		83292		178666		148520		99006		123252		224815		223288		279509		185282		0	0	41452	12376
0.29_333.05		[M-H]-		333.046	ESI neg	0.295	246990		436451		2602687		2345428		792643		439742		647364		625214		1351790		987024		2107078		1297973		0	0	227680	97838
0.29_337.08		[M-H]-		337.078	ESI neg	0.292	8155378		7279584		10809064		5717544		9708938		8311462		7279432		5645400		10010534		10681159		11613935		5809104		0	0	1896667	1093078
0.29_343.03		[M-H]-		343.031	ESI neg	0.291	90876		155962		185614		75512		190917		219346		277156		285025		228872		309912		296218		325297		0	0	16803	0
0.29_381.10		[M-H]-		381.104	ESI neg	0.289	1541798		1610409		817919		838941		221070		1178574		1178461		886610		1343254		1681702		1633144		1014496		2778	0	1203975	800306
0.29_398.09		[M-H]-		398.094	ESI neg	0.29	531249		868130		55851		365318		370685		378101		256567		194511		510853		567190		477691		270586		0	0	508356	396896
0.29_405.11		[M-H]-		405.108	ESI neg	0.29	2192201		47747		77865		265659		158392		2029254		1528783		534972		1487275		874227		7217		518257		8728	0	1379858	894742
0.29_487.13		[M-H]-		487.131	ESI neg	0.287	1883461		1352351		1584461		473498		1700096		1845778		2029025		1455371		1487108		1955855		2060153		1322809		0	0	962481	433508
0.29_619.17		[M-H]-		619.173	ESI neg	0.295	1157528		983007		995988		322274		98763		602631		620944		289691		952178		665886		1189743		277572		0	0	393399	416458
0.29_643.17		[M-H]-		643.173	ESI neg	0.287	692721		1028541		558779		219557		650314		666819		547744		712901		1003672		1372854		1176663		722429		0	0	677293	419855
0.30_111.01		[M-H]-		111.009	ESI neg	0.3	2199982		1773542		3906642		2703149		4738656		2626216		4549092		2999077		1754068		1950254		1999502		3521975		30824	50980	831135	185236
0.30_127.00		[M-H]-		127.004	ESI neg	0.303	536177		906820		940362		686025		767921		712352		791537		911969		1089219		1391797		1195608		1230143		13794	38176	482105	215001
0.30_145.01		[M-H]-		145.014	ESI neg	0.297	162617		250621		261053		148432		185579		207472		265056		255134		291086		301873		268535		341386		0	1732	193136	102050
0.30_151.03		[M-H]-		151.026	ESI neg	0.304	306823		180386		239928		180810		233306		105082		205735		155971		179118		248298		215817		261910		11991	1374	212375	128945
0.30_173.05		[M-H]-		173.046	ESI neg	0.302	137885		166638		30457		30018		58804		191888		114115		169056		255631		206903		225696		162826		19065	25508	221254	133663
0.30_187.02		[M-H]-		187.025	ESI neg	0.301	11772		73182		154956		35867		146229		114830		103306		167205		117702		151145		161822		228079		0	0	47876	12250
0.30_247.05		[M-H]-		247.046	ESI neg	0.298	860586		840522		1032156		422400		1161838		1087280		1349922		1559014		1088601		1275954		1245548		1304624		0	0	393048	89776
0.30_265.06		[M-H]-		265.057	ESI neg	0.296	188767		291984		460380		133081		421868		250710		284174		354298		766674		774765		787170		779031		0	0	161690	75916
0.30_301.00		[M-H]-		300.999	ESI neg	0.304	759871		645703		629098		488926		714296		751042		696098		829118		726458		857561		787999		745527		29911	3421	464887	234351
0.30_359.03		[M-H]-		359.026	ESI neg	0.3	52150		133688		167468		65639		136593		134053		132188		133818		133689		186564		245074		200072		0	0	13166	2254
0.30_391.03		[M-H]-		391.031	ESI neg	0.304	1781700		1840069		1412408		1134826		1368458		1487240		1658246		1575433		1622932		2027511		2050316		1715700		15078	41519	2100	5452
0.30_431.08		[M-H]-		431.083	ESI neg	0.305	0		284385		161397		123962		155694		195022		199055		200624		200437		306734		242589		336727		0	0	0	4767
0.30_465.09		[M-H]-		465.088	ESI neg	0.297	1308636		299232		2051842		466938		760629		1127697		1076530		1667423		442367		358992		476657		730142		0	0	154336	8477
0.30_523.09		[M-H]-		523.094	ESI neg	0.298	423965		131073		382127		168036		465246		311175		426197		408919		160653		127809		124925		376152		0	0	63887	15148
0.30_535.09		[M-H]-		535.094	ESI neg	0.299	501458		343648		438583		70323		448182		677562		468544		751501		591043		638690		481008		762077		0	0	71174	0
0.30_615.08		[M-H]-		615.085	ESI neg	0.296	368105		159649		787651		311692		252518		464198		545680		619074		239017		222743		333388		266289		0	0	128911	35685
0.30_665.06		[M-H]-		665.064	ESI neg	0.303	0		23384		9127		0		0		0		0		14515		0		0		0		14029		0	0	35887	0
0.30_673.09		[M-H]-		673.09	ESI neg	0.3	1793096		964805		1752846		1608552		2406408		1410176		2313989		1547906		825568		899987		925344		1572004		0	0	790617	159930
0.30_813.14		[M-H]-		813.137	ESI neg	0.303	1393577		702753		717467		337767		709208		992305		812126		1022048		774271		730282		717672		847586		0	0	371298	40847
0.30_85.03		[M-H]-		85.0294	ESI neg	0.298	220709		241482		398765		291261		446753		254283		419020		320018		173021		758254		266838		371546		113023	100893	275406	194644
0.30_963.13		[M-H]-		963.133	ESI neg	0.305	7221408		5059666		4618144		3386395		4755782		5503508		5395120		5522699		5485510		6303100		6163152		5384370		0	0	4137142	1191848
0.30_969.09		[M-H]-		969.086	ESI neg	0.305	316430		406375		397896		247535		383169		464900		387213		428751		521762		643788		609291		490233		0	0	181157	50765
0.31_317.09		[M-H]-		317.088	ESI neg	0.308	571288		503209		521599		290261		294847		517744		436621		504713		775175		726230		860398		854563		0	0	327551	0
0.31_319.07		[M-H]-		319.067	ESI neg	0.306	136584		145716		309924		691671		271702		232987		225799		252223		220732		169692		408846		281165		0	0	85127	11000
0.31_321.08		[M-H]-		321.083	ESI neg	0.309	32203		688796		1016251		493944		844020		1105963		1375129		1488440		861743		1572939		1206308		1622728		0	0	41385	28021
0.31_331.07		[M-H]-		331.067	ESI neg	0.309	9336784		5119110		6445346		3766298		6013933		7326142		6282792		7948578		6002122		5993218		5583389		6266275		4201	8721	3734938	788733
0.31_341.11		[M-H]-		341.109	ESI neg	0.313	476000		467746		790780		1593429		1192813		523611		484635		208054		305331		206874		275984		206773		0	0	11315174	6798158
0.31_394.06		[M-H]-		394.063	ESI neg	0.307	1036921		448685		421054		313624		452561		704783		505683		675153		487662		400850		424067		518340		0	0	467186	125332
0.31_400.04		[M-H]-		400.036	ESI neg	0.314	310721		468631		435725		367139		414361		384833		521189		620855		631858		622186		611020		760698		0	2653	25116	21929
0.31_457.05		[M-H]-		457.052	ESI neg	0.309	1635798		971312		949132		695596		999287		1143624		1114473		1207186		883471		1257372		1365887		892651		0	0	23304	0
0.31_467.05		[M-H]-		467.047	ESI neg	0.31	977671		879106		982857		662414		1018148		1016529		1071087		1251085		1175381		1333882		1324209		1319438		0	0	598454	244148
0.31_480.86		[M-H]-		480.863	ESI neg	0.308	503469		409387		455126		276825		434511		542752		371850		359470		212124		435298		366850		157664		0	0	428028	238277
0.31_481.25		[M-H]-		481.255	ESI neg	0.309	480045		494379		485837		339985		421906		487090		471665		547779		520916		694752		736615		468492		0	0	348770	193369
0.31_484.04		[M-H]-		484.039	ESI neg	0.307	793904		1034658		875123		657047		851107		961016		963046		1064646		1125955		1567550		1364006		1467480		0	8095	549490	361225
0.31_493.12		[M-H]-		493.12	ESI neg	0.309	422225		393773		455366		297425		403754		430220		346461		430278		371071		412315		354042		375799		0	0	220375	22502
0.31_495.04		[M-H]-		495.042	ESI neg	0.306	211925		365962		185806		122325		183458		112659		184876		213133		220630		309516		287747		258555		0	0	118620	7553
0.31_497.06		[M-H]-		497.057	ESI neg	0.314	121877		135662		93573		80480		112462		127467		131777		143798		148227		188001		181120		187192		0	0	133624	72116
0.31_519.05		[M-H]-		519.055	ESI neg	0.314	5897		282202		292466		212797		466724		440685		386717		516881		281017		543724		431455		540192		0	0	0	0
0.31_579.03		[M-H]-		579.03	ESI neg	0.308	344875		291098		264761		304568		409913		274428		279908		351539		302350		277764		495336		331320		0	0	172833	115953
0.31_605.08		[M-H]-		605.079	ESI neg	0.311	147780		485101		553863		251120		401343		408279		479050		258789		449777		697896		685830		338493		0	0	4539	0
0.31_633.07		[M-H]-		633.073	ESI neg	0.309	574331		1682314		1738449		1069157		1743429		1878790		1937367		2277052		2092976		2948334		2830707		2847482		0	2476	163738	0
0.31_649.07		[M-H]-		649.068	ESI neg	0.307	3722356		5233439		5127577		3057174		4691400		4797908		4773774		4791368		5589004		7026560		6871153		5581000		0	9644	383788	124144
0.31_783.07		[M-H]-		783.069	ESI neg	0.306	662192		759006		657337		537683		737826		730664		770546		779965		754851		917286		964846		873996		0	10301	2055	0
0.31_801.08		[M-H]-		801.08	ESI neg	0.308	207566		362215		320412		265895		359911		408549		350550		450559		456951		512038		483415		582764		0	0	173040	45531
0.31_915.11		[M-H]-		915.112	ESI neg	0.307	381771		289162		343815		230251		320960		293454		303876		376086		353848		439552		445815		309119		0	0	2376	0
0.32_219.05		[M-H]-		219.051	ESI neg	0.32	75310		69544		76788		13817		96413		108559		188041		154478		56739		69037		74054		149060		0	0	44157	146903
0.32_237.06		[M-H]-		237.061	ESI neg	0.324	235589		154582		180895		78506		255862		268443		257857		182517		148343		142185		226652		122175		0	0	101515	69973
0.32_407.03		[M-H]-		407.026	ESI neg	0.316	81382		132989		55920		53480		72341		50471		92825		95261		94958		125558		97210		126358		0	13601	116510	24827
0.32_475.03		[M-H]-		475.034	ESI neg	0.315	292548		686747		819629		604172		1042209		465079		555240		353451		758798		829126		997552		618743		26375	24238	179064	4263
0.32_546.07		[M-H]-		546.074	ESI neg	0.321	0		146016		111437		72753		163124		230960		155131		255712		136105		277818		174142		310233		0	0	0	0
0.33_165.04		[M-H]-		165.04	ESI neg	0.326	55939		48662		114414		69689		70936		63435		106880		57706		89319		103256		128181		76578		0	0	76705	61576
0.33_179.06		[M-H]-		179.056	ESI neg	0.327	431832		324297		2178462		284522		561436		599519		568288		630402		641196		490713		441997		435074		137831	93363	262012	225658
0.33_194.03		[M-H]-		194.032	ESI neg	0.329	475258		386169		451324		362063		424258		492149		485893		377440		516763		474676		434688		499647		0	0	478005	303124
0.33_195.05		[M-H]-		195.051	ESI neg	0.327	158552		114492		240638		77341		181340		123196		174564		141017		126836		103529		93852		117613		3561	17858	100718	81811
0.33_225.06		[M-H]-		225.062	ESI neg	0.325	294202		240572		1120827		229717		431457		325723		359169		391179		463793		325935		330481		334876		30076	33859	128479	124625
0.33_267.07		[M-H]-		267.072	ESI neg	0.326	352771		336484		453689		224129		544956		475014		423078		423042		434620		426594		444566		440253		0	5693	258990	289089
0.33_377.09		[M-H]-		377.086	ESI neg	0.327	353378		301374		588691		1430507		911246		421677		318392		82472		187940		95676		128758		80287		0	0	112334	5633776
0.33_404.10		[M-H]-		404.105	ESI neg	0.325	432328		416901		619331		2009992		1175456		552234		358193		95740		223701		138910		165742		98351		0	0	172670	6772995
0.33_549.05		[M-H]-		549.051	ESI neg	0.331	639202		572176		415674		361906		709961		636554		748425		557450		642060		738635		655967		604731		0	2350	806033	826320
0.33_565.02		[M-H]-		565.023	ESI neg	0.328	142465		179100		160401		121080		173246		143245		167095		184553		165642		240806		210588		197730		0	0	126160	103051
0.33_580.99		[M-H]-		580.987	ESI neg	0.329	978326		1229571		798476		792856		758817		841292		1400145		853381		1582629		1136951		1198758		734611		0	0	1190423	741498
0.33_625.98		[M-H]-		625.985	ESI neg	0.327	201264		155483		154728		107311		158138		160346		167168		156137		159448		199804		187861		198952		0	0	239226	205470
0.34_134.02		[M-H]-		134.018	ESI neg	0.339	195953		45767		527520		115429		178251		175566		291216		4496214		87277		67911		119072		146973		0	0	66126	341658
0.34_158.98		[M-H]-		158.979	ESI neg	0.339	487392		783286		869035		574521		966293		805504		1104550		830141		782121		806556		899441		766898		226143	251610	344970	365103
0.34_170.02		[M-H]-		170.018	ESI neg	0.342	0		286368		406237		219013		607242		354096		519573		373155		254929		415986		321928		437695		3757	4584	0	3960
0.34_232.94		[M-H]-		232.939	ESI neg	0.337	255855		106738		543038		281576		164483		187958		276783		222200		172577		60122		138687		75786		10020	26087	140593	55834
0.34_611.02		[M-H]-		611.02	ESI neg	0.34	89997		96439		115680		51136		128804		182246		195977		114897		120684		147784		126385		146723		0	0	71939	85978
0.35_578.97		[M-H]-		578.971	ESI neg	0.349	180961		251390		209562		147265		128415		232273		213240		229555		253232		262979		226287		211998		0	0	225904	134525
0.37_483.07		[M-H]-		483.067	ESI neg	0.373	2672672		1759996		2457143		1062681		2491306		2850481		2975492		2699184		2250223		3496776		3416209		3362933		0	0	2225674	1534670
0.38_127.00		[M-H]-		127.004	ESI neg	0.376	312379		379752		379778		207207		305870		343286		352374		396761		398672		622492		503932		597886		21675	19767	331057	207217
0.38_169.01		[M-H]-		169.014	ESI neg	0.384	100823		5597948		7367036		2824964		9220919		7933979		6881746		10093134		5567827		7639384		6560855		9258050		167736	68031	87342	163826
0.38_457.05		[M-H]-		457.052	ESI neg	0.379	897852		181421		278526		116685		290841		280564		314583		390448		275433		434682		397623		360151		0	0	593790	0
0.39_205.04		[M-H]-		205.035	ESI neg	0.385	284025		175972		303912		85282		265384		325472		427255		308330		254421		282819		309478		448249		2738	3868	176281	115128
0.39_400.04		[M-H]-		400.036	ESI neg	0.392	252560		126688		120216		60096		130887		145486		145892		208096		164234		200516		171133		256777		0	0	20952	3084
0.39_649.07		[M-H]-		649.069	ESI neg	0.386	1052978		655884		934500		295310		766168		1057858		1146854		1380940		994221		2000066		1437287		2157915		0	0	459291	124010
0.39_801.08		[M-H]-		801.08	ESI neg	0.392	149441		92679		135068		47140		128246		153801		132816		199431		140294		220308		192599		260843		0	0	69155	53878
0.40_151.03		[M-H]-		151.026	ESI neg	0.404	344603		202786		307144		141640		263020		214060		268064		249549		225705		332422		279524		426392		0	0	219013	171016
0.40_268.94		[M-H]-		268.939	ESI neg	0.397	3923		248840		220319		128419		196459		194408		186614		234770		242907		183891		162651		175645		0	0	0	1863
0.40_549.05		[M-H]-		549.052	ESI neg	0.402	884690		599684		762717		459449		816404		1012024		809813		912615		675162		1020341		1016005		957334		0	0	830880	814140
0.40_625.99		[M-H]-		625.985	ESI neg	0.401	228346		150244		189079		105387		176656		217290		193990		206879		183619		231656		222783		225807		0	0	232048	188052
0.41_191.02		[M-H]-		191.02	ESI neg	0.41	2980378		1317343		3473608		2190652		4204624		2383150		3835974		2147294		1219411		1570677		1662316		2894504		100453	41955	1988738	1131646
0.41_194.03		[M-H]-		194.032	ESI neg	0.411	502411		384572		625799		300737		582550		661696		590868		502235		622050		713012		605816		695114		0	0	384244	278762
0.41_203.02		[M-H]-		203.02	ESI neg	0.413	1683932		1467469		1995235		911457		2092097		2300625		2086093		2082712		2080498		2641254		2453276		2360162		0	1691	1366774	804645
0.41_301.00		[M-H]-		300.999	ESI neg	0.414	248777		142209		248866		91660		243683		258527		248644		246400		182679		327776		324338		349692		61245	1990	195442	128098
0.41_355.03		[M-H]-		355.031	ESI neg	0.411	455707		318076		484218		170268		433356		579674		539503		462814		414049		583677		581886		567685		0	0	290864	167153
0.41_440.99		[M-H]-		440.993	ESI neg	0.414	56757		55750		52378		45550		37627		28041		31013		27440		47420		16781		17856		23446		0	0	298091	133979
0.41_480.87		[M-H]-		480.87	ESI neg	0.413	256042		121636		278780		59709		204029		266763		192901		179571		211316		347749		258344		306295		0	0	195029	71736
0.41_481.06		[M-H]-		481.062	ESI neg	0.413	54737168		36264256		58887692		23374376		53003772		59167976		58402844		56839100		45839296		70995128		70940952		67041316		21145	34339	44979272	31414630
0.41_481.26		[M-H]-		481.255	ESI neg	0.411	238136		151480		223039		105130		214541		241203		298419		240057		173193		315576		348302		285667		0	0	184185	147657
0.41_783.07		[M-H]-		783.069	ESI neg	0.412	3395699		418821		874794		386731		846310		613753		612396		512249		607723		817090		753015		615139		4297	0	4287070	1857
0.41_963.13		[M-H]-		963.133	ESI neg	0.414	887015		444734		1054579		187413		784116		885010		1011610		866355		658164		1435387		1438268		1275905		0	0	667096	290905
0.42_111.01		[M-H]-		111.009	ESI neg	0.418	229653		155902		248007		170732		287589		185809		274241		195785		133732		174166		173454		248176		36606	33395	208314	135189
0.42_243.06		[M-H]-		243.062	ESI neg	0.422	247892		190350		347206		248640		400382		255167		222865		234124		227801		294698		306550		385018		0	0	244369	173853
0.42_345.05		[M-H]-		345.046	ESI neg	0.417	8564		701230		1181511		456960		1080175		2106714		2546812		3375509		642388		1826599		1189240		3306274		0	0	2911	2557
0.43_178.04		[M-H]-		178.037	ESI neg	0.427	227221		135261		219301		119596		221391		238526		194966		205265		239593		226642		206683		271606		0	0	125962	68355
0.43_192.05		[M-H]-		192.053	ESI neg	0.428	1912888		1277701		1879979		1040290		1943554		2017859		1980581		2049098		1523018		1957904		1868247		2296358		0	0	1161164	687087
0.43_221.03		[M-H]-		221.03	ESI neg	0.435	309920		186964		317969		90026		294989		329751		449169		301206		275772		367126		345038		546595		0	0	214325	120093
0.43_542.06		[M-H]-		542.058	ESI neg	0.426	206324		344175		486913		201776		451184		573948		537110		700666		378442		711773		580185		643958		0	0	118969	92005
0.43_813.14		[M-H]-		813.137	ESI neg	0.431	388809		67465		252278		10411		185557		196008		207285		283181		134535		206799		161803		318926		0	0	166878	68941
0.44_163.03		[M-H]-		163.026	ESI neg	0.443	222045		156769		341559		137992		259697		295135		276534		226202		224371		228013		180781		246912		0	0	149186	61423
0.44_173.01		[M-H]-		173.009	ESI neg	0.437	147610		79816		181060		67791		171198		125240		186666		155348		140710		173769		184690		278843		0	0	107293	57687
0.44_193.04		[M-H]-		193.037	ESI neg	0.436	300915		178137		272836		114560		248998		272238		312532		233420		183556		209159		180827		245010		4942	3873	184247	108980
0.44_207.02		[M-H]-		207.016	ESI neg	0.443	959630		708376		1428808		632530		1197055		1399539		1293518		979677		1020407		1054697		817914		1094024		0	0	629816	258180
0.44_271.08		[M-H]-		271.082	ESI neg	0.442	227182		239093		334615		120247		177868		260821		257248		251337		422890		436330		454107		555725		0	0	191696	130482
0.44_307.06		[M-H]-		307.059	ESI neg	0.442	204752		265997		374490		177230		193012		316748		268926		267733		481679		422278		486373		556081		0	0	220021	183112
0.44_359.03		[M-H]-		359.025	ESI neg	0.444	223295		154517		260573		85353		174972		225195		244953		221949		168724		295888		265472		299478		0	0	124679	48489
0.44_394.06		[M-H]-		394.062	ESI neg	0.437	1386603		401359		844847		273958		753084		1001711		787609		1164016		546652		485116		469658		954680		0	0	561253	790198
0.44_484.04		[M-H]-		484.039	ESI neg	0.438	1027786		866001		1165706		520553		937586		975922		1005377		1161908		1202018		1669367		1491065		1880253		0	0	724981	415766
0.44_507.10		[M-H]-		507.099	ESI neg	0.437	167373		147981		221808		122569		171036		151724		169693		232967		109272		171989		160534		262758		0	0	126066	85879
0.44_850.07		[M-H]-		850.067	ESI neg	0.437	143776		169372		191715		55774		192001		188176		143896		249041		224491		245889		165018		229400		0	0	115793	100346
0.45_231.08		[M-H]-		231.078	ESI neg	0.454	4982		4245		0		3815		5472		0		0		4066		0		0		8012		0		4796	0	341355	145673
0.45_319.07		[M-H]-		319.067	ESI neg	0.446	412014		340193		1493855		2807114		1027190		619176		682201		644406		482587		415711		1478009		786405		0	0	458734	292117
0.45_327.04		[M-H]-		327.036	ESI neg	0.448	285332		128446		252972		139134		389653		216593		273291		303454		203470		211975		264681		269913		0	0	120087	63251
0.45_331.07		[M-H]-		331.067	ESI neg	0.446	24792550		10681894		19165240		6018280		16500687		18784670		17403052		21804718		15722839		17489434		16452091		22491236		0	0	11743544	8022328
0.45_399.05		[M-H]-		399.054	ESI neg	0.451	301307		143298		198936		98030		180897		245768		189527		278490		168159		170357		157506		257083		0	0	150992	160496
0.45_407.03		[M-H]-		407.025	ESI neg	0.449	116237		118498		138041		56180		143767		118190		159756		161144		120198		165981		151593		183706		0	0	204891	90238
0.45_430.99		[M-H]-		430.992	ESI neg	0.448	522224		311019		437074		220306		249246		334691		358363		392559		436450		283635		275518		291643		0	0	300561	166609
0.45_457.05		[M-H]-		457.052	ESI neg	0.454	5123425		3162276		4854708		2362719		4732362		4209025		4310317		4970738		4091284		4995496		5560892		5006822		0	0	3273626	2214048
0.45_473.05		[M-H]-		473.047	ESI neg	0.45	128952		186927		170257		86260		185078		166895		181961		209424		221223		267008		203631		319189		0	0	136513	91030
0.45_495.04		[M-H]-		495.042	ESI neg	0.45	292845		269217		151894		72062		176226		104946		184354		216224		206476		231706		192347		259772		0	0	369041	150024
0.45_649.07		[M-H]-		649.068	ESI neg	0.452	9874709		7081564		11057598		3777187		9105223		8111794		10067636		8890883		8752192		12633614		13072233		11992231		0	2152	6648740	2652745
0.45_685.18		[M-H]-		685.183	ESI neg	0.45	166861		162768		178803		63226		198664		172826		181885		215359		201073		216621		211866		257446		0	0	211594	128793
0.45_783.57		[M-H]-		783.571	ESI neg	0.453	59499		162629		265187		78251		265203		195052		157212		240746		198738		315090		367330		308785		0	0	118027	39170
0.45_805.05		[M-H]-		805.051	ESI neg	0.454	98509		165403		212583		130965		238099		159373		236033		213962		164741		250586		238879		247842		0	0	154734	121362
0.45_915.11		[M-H]-		915.112	ESI neg	0.453	1769086		850893		1401223		565955		1484109		1238331		1368218		1699578		1224890		1615020		1759032		1633710		0	0	1010721	628526
0.45_969.09		[M-H]-		969.087	ESI neg	0.445	308670		203883		278085		107392		243958		243935		269309		316332		301779		408408		361092		497594		0	0	194823	93300
0.46_205.04		[M-H]-		205.035	ESI neg	0.458	643726		264070		793779		144748		657590		556379		961672		647069		412883		667531		602545		1042982		0	3552	493886	203511
0.46_329.09		[M-H]-		329.088	ESI neg	0.457	227571		167898		230122		124454		223340		193860		222193		236240		254076		290755		264778		289920		0	0	197898	87699
0.46_353.01		[M-H]-		353.015	ESI neg	0.459	246265		208664		284506		130856		321931		269234		341957		335992		343247		426191		410360		451061		0	0	118503	27293
0.46_391.03		[M-H]-		391.031	ESI neg	0.456	5227710		8004800		10561468		5881467		10137716		8765850		11804404		9268200		9018952		10478852		11080939		11952723		26222	46206	5843968	3454996
0.46_463.49		[M-H]-		463.492	ESI neg	0.458	107597		199338		187357		160269		196145		175690		175639		154047		178095		207164		193343		207194		0	0	188559	129290
0.46_633.07		[M-H]-		633.074	ESI neg	0.461	4688317		3632786		5835650		2346935		5274504		4529200		5542102		5563377		5940830		8574964		9212315		8535221		0	0	3837384	1478468
0.46_783.07		[M-H]-		783.07	ESI neg	0.463	3395699		4461344		6934820		2818873		6680722		5911124		7312593		6899117		5703770		7409229		7708832		8342532		4297	16706	4287070	2284865
0.46_867.07		[M-H]-		867.072	ESI neg	0.463	13055		66216		47709		18426		92663		69923		112014		98532		83711		204112		147881		230937		0	0	19990	5923
0.47_182.05		[M-H]-		182.046	ESI neg	0.473	347176		146431		385182		146131		321677		279386		299121		276219		213915		336841		275940		333916		0	0	211361	96441
0.47_232.01		[M-H]-		232.01	ESI neg	0.469	1000830		508981		528138		373321		699988		649208		564049		759541		432663		491842		454604		637647		0	0	1134461	791188
0.47_268.94		[M-H]-		268.939	ESI neg	0.469	936252		883673		665113		580089		610144		561748		642007		693818		746889		482753		465562		447367		15690	0	1254038	394485
0.47_285.93		[M-H]-		285.929	ESI neg	0.471	192646		174645		127757		129184		107770		87287		123642		143781		124890		75398		68972		65929		0	0	244154	123011
0.47_321.08		[M-H]-		321.083	ESI neg	0.472	1924533		922435		1737852		669664		1533019		1591198		478982		509065		1202405		499165		1915602		536544		0	0	1039289	508748
0.47_339.04		[M-H]-		339.036	ESI neg	0.467	520017		214056		314617		45658		441004		247266		263276		452874		196918		287454		230000		392728		0	0	464497	82337
0.47_493.12		[M-H]-		493.12	ESI neg	0.468	1269154		683826		1050707		453537		964424		908724		905233		1109106		857541		998133		874443		1139876		0	0	846051	596176
0.47_519.05		[M-H]-		519.055	ESI neg	0.467	606404		335070		570548		168656		724860		650465		525638		569599		444427		730088		657462		730657		0	0	346556	135518
0.47_541.05		[M-H]-		541.055	ESI neg	0.469	1093459		1749021		2524956		982514		2394082		3021678		2857599		3938217		2055021		2476058		2238217		3321563		0	0	610865	451519
0.47_546.07		[M-H]-		546.073	ESI neg	0.467	400514		172672		262546		107904		364946		312597		263759		299934		220551		373072		43634		384385		0	0	221190	98474
0.47_605.08		[M-H]-		605.078	ESI neg	0.475	724335		457503		709178		231779		550204		503745		626265		611888		548179		868592		856541		879417		0	0	283233	110842
0.47_951.07		[M-H]-		951.075	ESI neg	0.466	213690		269882		335452		126012		314630		307076		399037		416016		380940		646376		480497		692700		0	0	129142	72358
0.48_137.02		[M-H]-		137.024	ESI neg	0.481	689054		440970		601630		328321		426331		506010		507593		481808		664629		687671		708528		801489		127158	130460	97441	102268
0.48_198.99		[M-H]-		198.988	ESI neg	0.476	27895		45297		34979		13465		33226		21420		71651		57385		52290		62767		67046		106721		4714	0	45497	3462
0.48_213.00		[M-H]-		213.004	ESI neg	0.483	52737		40798		68034		5550		73727		23887		72743		58800		42725		68904		69365		93407		0	0	59352	2688
0.48_276.02		[M-H]-		276.018	ESI neg	0.481	596475		306338		457927		297725		256413		173334		335879		182598		341714		151494		210226		255308		31036	1802	386482	160996
0.48_297.12		[M-H]-		297.119	ESI neg	0.477	624959		132982		222104		147972		154370		195095		254515		216084		288191		190280		159435		258696		0	0	341900	150832
0.48_345.05		[M-H]-		345.046	ESI neg	0.476	8564		1485240		2032435		842031		2067980		2338968		2620000		3375509		1244318		1681107		1936220		3306274		0	0	177025	0
0.48_400.04		[M-H]-		400.036	ESI neg	0.482	1707529		1677051		2158656		1196362		2015034		1760116		2271716		1781816		2264933		2462434		2499761		2440070		0	0	1472324	662393
0.49_345.08		[M-H]-		345.083	ESI neg	0.488	2024388		1135320		1639004		747938		975482		1306561		1362756		1112576		1980414		1976297		1851421		1929055		0	0	2044628	1855
0.49_375.13		[M-H]-		375.13	ESI neg	0.487	584477		435277		455746		160336		308650		318735		427706		433614		620418		541214		704860		695901		0	0	76363	0
0.49_459.08		[M-H]-		459.078	ESI neg	0.488	789838		501714		867653		481370		739434		693566		857725		676322		734449		936215		1093798		982185		0	0	365102	177310
0.49_801.08		[M-H]-		801.08	ESI neg	0.487	816781		696190		1046678		479278		1075761		846087		1052597		964746		1062448		1251220		1292471		1328584		0	0	732717	304512
0.50_487.11		[M-H]-		487.11	ESI neg	0.497	57402		686206		1428946		820673		1508734		1520182		1707836		294845		823697		1253586		1275501		293989		0	0	14745	3523
0.50_551.04		[M-H]-		551.039	ESI neg	0.503	152093		169845		176027		104894		236078		199053		198798		215668		319932		327892		359390		307827		0	0	170088	76674
0.51_467.05		[M-H]-		467.047	ESI neg	0.506	1010116		737283		952033		429334		1001162		933849		1023184		968425		1023032		1284672		1295110		1300011		0	0	548363	176569
0.52_137.02		[M-H]-		137.024	ESI neg	0.524	689054		440970		601630		328321		426331		506010		507593		485686		664629		687671		708528		801489		109695	130460	743512	431069
0.52_299.08		[M-H]-		299.077	ESI neg	0.524	1661762		915459		1373587		640556		799881		1029002		1050882		951639		1601511		1591439		1495619		1786295		0	0	1701870	844972
0.52_301.09		[M-H]-		301.093	ESI neg	0.521	215089		112880		257098		188207		126176		152240		181629		142495		273031		277988		328004		407026		0	0	237213	133334
0.52_321.08		[M-H]-		321.083	ESI neg	0.524	1924533		922435		1737852		669664		1533019		1591198		1802967		1539666		1201634		1791138		1915602		1712124		0	0	20414	508748
0.52_335.05		[M-H]-		335.054	ESI neg	0.524	725618		289513		426016		203007		292346		383172		337315		320100		497099		497765		490859		624806		0	0	596347	331032
0.52_346.09		[M-H]-		346.086	ESI neg	0.52	332771		182445		245956		127043		156856		193433		197536		183572		303562		302549		293034		340584		0	0	304337	158465
0.52_347.10		[M-H]-		347.099	ESI neg	0.515	637302		316284		713065		559199		362154		454190		544165		408578		835447		774878		907916		1108198		0	0	692280	366676
0.52_362.07		[M-H]-		362.073	ESI neg	0.524	415796		250931		364414		176777		238761		340202		303388		313108		414172		473746		431660		582498		0	0	379526	264249
0.52_391.03		[M-H]-		391.031	ESI neg	0.522	15649601		7857294		8764858		4500146		7711564		9736851		11804404		8926404		9450640		11264725		11517581		11114132		15122	13922	11670162	5482247
0.52_394.06		[M-H]-		394.063	ESI neg	0.521	233056		152923		351722		138453		385041		153009		164530		112576		110584		159726		166034		92472		0	0	2664	8380
0.52_463.49		[M-H]-		463.492	ESI neg	0.515	412361		199338		212015		154424		201903		259260		251959		251317		220010		236321		246796		255729		0	0	308542	176987
0.52_484.54		[M-H]-		484.541	ESI neg	0.519	125227		298872		267555		149728		248706		250464		269026		235219		306702		416300		446877		411713		0	0	81214	60208
0.52_805.05		[M-H]-		805.051	ESI neg	0.516	418754		165403		212583		92496		238099		251998		231483		236887		169087		250586		245497		275268		0	0	325247	199014
0.53_159.03		[M-H]-		159.03	ESI neg	0.529	83925		124572		112933		25764		55322		62106		67781		62736		88852		107799		56110		77378		12450	11434	129399	60997
0.53_345.05		[M-H]-		345.046	ESI neg	0.534	4520630		1485240		2032435		842031		2067980		2338968		2620000		2116721		1244318		1681107		1936220		1928859		0	0	2931376	1028844
0.53_435.98		[M-H]-		435.979	ESI neg	0.531	306755		215369		208738		142638		119303		190137		214361		169740		226183		208897		212014		153154		0	0	293513	107988
0.53_441.49		[M-H]-		441.495	ESI neg	0.533	326569		212203		210460		129703		121871		172071		234537		169547		248888		203215		215568		177192		0	0	299467	85331
0.54_232.08		[M-H]-		232.083	ESI neg	0.535	196138		94462		193399		38233		145891		92367		83658		127049		148296		111865		135428		156829		0	0	139005	65175
0.54_297.12		[M-H]-		297.119	ESI neg	0.539	624959		269623		495086		363222		299071		389149		474230		309864		288191		397030		368711		368208		0	0	72615	54009
0.54_375.13		[M-H]-		375.13	ESI neg	0.54	584477		435277		455746		160336		221967		354409		427706		355581		620418		604039		704860		630330		0	0	754654	450886
0.54_439.99		[M-H]-		439.985	ESI neg	0.537	1052024		565334		574134		368614		333431		435189		552949		450231		669820		523028		557365		395291		0	0	956145	307771
0.54_605.08		[M-H]-		605.079	ESI neg	0.542	765270		477957		690267		202761		459069		520659		527585		490008		504410		828907		787913		609845		0	0	20589	18548
0.54_633.07		[M-H]-		633.073	ESI neg	0.542	2106864		1019856		1363643		532724		1252571		1288261		1488919		1599286		1649211		2512714		2621514		2553820		0	0	1466990	584567
0.56_331.07		[M-H]-		331.067	ESI neg	0.556	293857		1319944		2654988		911734		2473135		2172704		1555744		899929		1696310		1689129		2177192		959609		0	0	119751	121422
0.56_470.07		[M-H]-		470.073	ESI neg	0.561	247407		134262		171182		83082		192397		174757		221650		223299		144378		215658		181987		170630		0	0	1505	1407
0.57_400.04		[M-H]-		400.036	ESI neg	0.574	631226		659110		911931		477184		996561		824381		854290		908984		955416		1051664		1136471		1103737		0	0	537477	184247
0.57_431.08		[M-H]-		431.083	ESI neg	0.573	424		100370		117204		31614		90821		70522		90024		66571		86237		110704		142089		110096		0	0	0	0
0.58_453.04		[M-H]-		453.039	ESI neg	0.581	189365		202447		301128		102084		246556		123113		148917		120322		143384		211009		216032		130761		0	0	211523	39442
0.58_487.11		[M-H]-		487.11	ESI neg	0.581	24565		95513		171402		85974		194612		270211		353270		865767		128063		231339		193997		751372		0	0	38696	18447
0.59_332.07		[M-H]-		332.07	ESI neg	0.588	22144		183006		394269		115030		351132		320641		295881		260218		242201		344491		311617		180803		0	0	8375	9747
0.59_345.05		[M-H]-		345.046	ESI neg	0.586	5981008		1163224		1797448		682649		2035479		1627538		1640178		1343992		996899		1176592		1493256		1054345		0	0	2931376	1028844
0.59_394.06		[M-H]-		394.063	ESI neg	0.588	4780		154293		351722		102877		385041		336691		272735		254439		191287		308306		301856		294896		0	0	13274	2088
0.59_951.07		[M-H]-		951.075	ESI neg	0.589	349587		134817		214685		71363		219180		187564		222861		231686		193944		306130		350992		291687		0	0	258574	84380
0.60_391.03		[M-H]-		391.031	ESI neg	0.599	15649601		8758569		12843303		5568223		14384948		12082220		9710308		10959916		11154455		16736048		12101791		9937252		7862	25318	1272618	1050657
0.60_425.02		[M-H]-		425.025	ESI neg	0.603	223179		150819		213549		99610		274266		170736		152678		140379		143661		255470		161881		201922		0	0	28382	26106
0.60_435.98		[M-H]-		435.979	ESI neg	0.603	117616		265666		283653		188975		253482		211995		212293		150670		309939		274676		250655		202187		0	0	49379	21008
0.60_474.99		[M-H]-		474.987	ESI neg	0.603	190649		187890		162299		114844		154780		127997		196648		99168		158098		175714		154284		132606		0	0	13501	3918
0.60_649.07		[M-H]-		649.069	ESI neg	0.596	392694		1195650		1692572		545544		1396232		992289		915622		762197		1463903		2486804		2191715		1190882		0	0	67064	61372
0.60_846.07		[M-H]-		846.065	ESI neg	0.603	60945		109589		195315		73253		224413		201493		209587		187893		143714		252143		228929		169742		0	0	15190	6509
0.61_375.13		[M-H]-		375.13	ESI neg	0.609	714428		252716		333896		112361		223533		176100		227420		209581		419367		404708		389384		357001		0	0	48901	450886
0.61_463.49		[M-H]-		463.492	ESI neg	0.608	130720		261631		364218		233602		392494		306624		374113		286533		285427		308396		313665		291771		0	0	140977	44889
0.62_362.07		[M-H]-		362.073	ESI neg	0.624	473553		222250		412736		183455		257104		312288		272861		196355		395866		434623		386678		319935		0	0	1639	17126
0.62_439.99		[M-H]-		439.985	ESI neg	0.619	256233		1068031		1161368		822936		839326		774148		1062488		678509		1110949		1012522		906421		741148		0	1774	1321847	33725
0.62_527.07		[M-H]-		527.065	ESI neg	0.622	5158		291706		717323		330810		707554		200159		243927		48143		270196		334200		397506		65459		0	0	2442	0
0.62_541.05		[M-H]-		541.055	ESI neg	0.618	2113664		1127306		1458160		520842		1396377		1665134		1277736		1430876		1149694		1805708		1817244		1528771		0	0	1421791	297775
0.63_801.08		[M-H]-		801.08	ESI neg	0.634	369394		312078		507409		207294		527569		404070		501893		479348		469171		785265		700211		796254		0	0	267067	101655
0.63_805.05		[M-H]-		805.052	ESI neg	0.631	37374		213276		316524		145384		375611		365489		343430		350557		253807		393372		346560		429728		0	0	53600	6286
0.64_400.04		[M-H]-		400.036	ESI neg	0.637	869328		691320		876360		444185		926146		823629		914120		866433		885339		1204650		1070803		1284724		0	0	651537	268453
0.65_301.09		[M-H]-		301.093	ESI neg	0.653	2028		105838		278482		205876		141099		148432		163454		117039		298086		311228		309371		369406		0	0	1192	747
0.65_335.05		[M-H]-		335.054	ESI neg	0.647	35365		360586		634213		265031		379044		456714		395205		281522		616629		642140		586417		477114		0	0	1445	1781
0.65_453.04		[M-H]-		453.039	ESI neg	0.65	262670		204254		313368		102084		246556		223112		254915		143982		216629		432592		440095		237555		0	0	209955	103302
0.65_483.08		[M-H]-		483.078	ESI neg	0.647	863158		351348		576570		172561		668898		516601		447079		532416		415351		725528		605982		553711		0	0	577271	8253
0.65_633.07		[M-H]-		633.074	ESI neg	0.653	166518		1055636		1790494		567342		1597521		1395123		1582846		1559111		1728839		3040838		2946252		1575907		0	0	105900	61561
0.66_137.02		[M-H]-		137.024	ESI neg	0.663	107807		530814		850388		405245		479523		575939		597482		608052		807587		871764		850723		604832		116975	123356	110067	129266
0.66_331.07		[M-H]-		331.067	ESI neg	0.656	3517127		1214500		2006137		657298		1765905		2213374		2208549		1835774		1674100		2383574		1994779		2081796		0	0	1471812	108014
0.66_391.03		[M-H]-		391.031	ESI neg	0.658	5258620		11229437		17877436		9689200		14384948		12082220		13519491		10913680		11154455		16736048		18600602		14545039		11430	25318	12219059	652404
0.66_819.05		[M-H]-		819.046	ESI neg	0.659	91386		259928		324386		123994		374695		192037		187775		148620		181175		234970		238581		199900		0	0	255733	3069
0.67_299.08		[M-H]-		299.077	ESI neg	0.673	43557		1221662		2097154		811691		1073085		1329414		1323147		1296578		1972611		2045744		1986809		2052823		0	0	3684	10160
0.67_880.98		[M-H]-		880.977	ESI neg	0.674	261047		237881		238538		185512		134942		80106		96721		118878		174542		155946		180635		43880		0	0	272008	18884
0.68_474.99		[M-H]-		474.987	ESI neg	0.679	177187		184431		112576		208815		133735		166197		135973		131274		161421		175714		130029		112933		0	0	200677	46492
0.68_475.03		[M-H]-		475.034	ESI neg	0.681	1225077		1762028		2037758		759757		1891301		1486772		1899525		1786613		1614984		2677114		2671638		2194947		0	8572	1328052	1139878
0.68_497.95		[M-H]-		497.945	ESI neg	0.679	167975		254521		136030		218750		55907		84464		128600		58737		196508		70024		93523		49924		0	0	203108	16771
0.69_362.07		[M-H]-		362.073	ESI neg	0.692	0		94982		91744		183455		92687		312288		272861		279149		395866		434623		386678		420010		0	0	0	1353
0.69_439.99		[M-H]-		439.985	ESI neg	0.689	1493705		1619098		1378758		1237642		948285		1000246		1187092		788099		1692520		1042564		1167252		741148		0	1774	1404469	255511
0.69_441.99		[M-H]-		441.994	ESI neg	0.693	273234		253114		249991		230492		229515		229582		220382		216914		255345		209963		235296		169133		0	0	248665	136917
0.69_449.49		[M-H]-		449.488	ESI neg	0.689	202012		224916		145011		225688		158534		181772		173279		167852		205895		173745		152254		120167		0	0	215869	155954
0.69_792.07		[M-H]-		792.074	ESI neg	0.691	174454		144553		236731		56254		213570		171838		191889		108884		202053		274747		207917		265299		0	0	64865	6018
0.69_810.53		[M-H]-		810.53	ESI neg	0.687	711474		565784		667592		303436		484685		386153		274145		103226		718603		365530		571830		125905		0	0	692968	23193
0.69_867.07		[M-H]-		867.071	ESI neg	0.69	179101		578188		986780		108768		629371		257666		284596		221219		487477		659793		753249		276455		0	0	246535	52511
0.70_801.08		[M-H]-		801.079	ESI neg	0.705	442107		385546		599806		207309		572401		474834		529482		617976		537862		791000		693274		881329		0	0	208021	109319
0.70_805.05		[M-H]-		805.05	ESI neg	0.705	170158		121824		160738		97526		190212		170105		179427		230564		125754		166347		193792		429728		0	0	175322	114439
0.70_881.98		[M-H]-		881.982	ESI neg	0.703	227710		190658		179813		137618		156273		129925		149822		102554		211653		156981		178308		127650		0	0	225783	125129
0.71_1175.11		[M-H]-		1175.11	ESI neg	0.708	587196		303381		655241		93303		547228		338641		478237		151885		552664		791270		710509		181650		0	0	449555	67188
0.71_335.05		[M-H]-		335.054	ESI neg	0.711	0		71442		76920		74946		65789		456714		395205		417728		117369		642140		177171		654899		0	0	0	1781
0.71_375.13		[M-H]-		375.13	ESI neg	0.711	0		504640		688588		215166		416878		256835		282188		240309		643663		399486		713833		375032		0	0	0	1584
0.71_391.03		[M-H]-		391.031	ESI neg	0.715	17691970		14286421		17877436		9689200		17123752		15877057		16497304		18088114		17154806		19692626		18920336		17006002		4402	14921	16878152	10838599
0.71_392.54		[M-H]-		392.535	ESI neg	0.712	462776		354397		498972		244529		410367		351056		427410		327603		411888		406231		472046		425539		0	0	394731	256806
0.71_527.06		[M-H]-		527.065	ESI neg	0.707	146667		888463		2211652		667972		1753253		826108		979777		514012		856642		927903		1198012		482964		2533	0	758409	0
0.71_633.07		[M-H]-		633.073	ESI neg	0.707	164926		425400		669287		278664		627572		1395123		1582846		1559111		615329		3040838		1242955		2515045		0	0	79528	47878
0.71_794.06		[M-H]-		794.059	ESI neg	0.714	967214		566392		827034		325562		926757		827921		802066		490200		708642		992670		854529		571502		0	0	895375	427282
0.71_809.02		[M-H]-		809.021	ESI neg	0.711	496747		411227		496958		201034		362278		249571		394453		199244		608395		434391		474360		188951		0	0	492030	85659
0.71_832.02		[M-H]-		832.024	ESI neg	0.713	340977		270057		339072		134003		184133		160881		246922		129845		389120		265445		306994		115498		0	0	301355	70885
0.72_137.02		[M-H]-		137.024	ESI neg	0.716	86441		171578		204219		120390		188783		575939		597482		608052		237078		871764		289831		875028		116975	107780	107994	106750
0.72_321.07		[M-H]-		321.073	ESI neg	0.718	182189		115759		261264		63691		202666		147945		159606		52864		206559		140916		228086		141365		0	0	375254	162594
0.72_331.07		[M-H]-		331.067	ESI neg	0.723	3517127		1043641		1987873		575128		1661506		1844496		1803791		2143370		1233687		1859878		1444665		2012475		0	0	1796228	1003479
0.72_425.03		[M-H]-		425.025	ESI neg	0.723	351132		275828		265652		252082		371401		355493		286842		404699		296383		308818		344771		344663		0	0	337712	338409
0.72_463.49		[M-H]-		463.492	ESI neg	0.72	694084		490314		550232		435192		560327		520927		499813		417745		544106		478877		544182		455492		0	0	693767	521782
0.72_483.08		[M-H]-		483.078	ESI neg	0.717	863158		336098		559712		171702		668898		464090		454388		596741		414825		615804		460285		656671		0	0	721363	298549
0.72_851.06		[M-H]-		851.058	ESI neg	0.716	339114		263571		282570		206895		344831		338118		297841		362608		253571		297606		309342		294638		0	0	337543	318930
0.73_481.06		[M-H]-		481.062	ESI neg	0.733	880928		985616		1572189		539017		1496882		1247675		1417767		1341614		1086967		1788207		1673976		1856289		0	4282	627471	665282
0.73_841.53		[M-H]-		841.525	ESI neg	0.73	201882		154209		145495		104817		135647		146965		154340		151623		200307		132745		169504		121304		0	0	178535	68390
0.73_846.06		[M-H]-		846.064	ESI neg	0.732	267893		195900		252812		152478		284669		247740		254621		283718		207285		304694		265738		254775		0	0	252959	219594
0.73_933.09		[M-H]-		933.093	ESI neg	0.732	354102		130884		278253		34525		223810		160240		160047		214993		160913		268037		272990		209972		0	0	217468	48126
0.74_919.10		[M-H]-		919.104	ESI neg	0.742	118972		175867		382284		83506		310870		185797		200203		123456		212573		363676		294426		131714		0	0	156639	0
0.75_792.07		[M-H]-		792.074	ESI neg	0.748	133195		144553		211651		48681		207094		167949		199647		220768		202053		298141		205049		266092		0	0	25341	6018
0.76_400.04		[M-H]-		400.036	ESI neg	0.758	448103		696057		762481		512554		860873		700182		831946		841559		762681		858974		948356		996249		0	0	168060	135915
0.76_435.98		[M-H]-		435.979	ESI neg	0.76	286225		378133		271162		361325		239192		261169		277255		264952		328272		207865		262991		170814		0	0	333300	240036
0.76_439.98		[M-H]-		439.985	ESI neg	0.76	1224884		1702195		1330446		1266892		978108		1000246		1202897		1044755		1615333		1063351		1132044		831055		3285	1783	1404469	569211
0.76_497.94		[M-H]-		497.945	ESI neg	0.759	127250		261057		146545		240719		54451		67906		114636		71818		235595		87637		90748		35516		0	0	181984	62416
0.76_810.53		[M-H]-		810.53	ESI neg	0.758	682742		599810		601316		303436		452488		365718		523450		508073		686839		566316		584849		413312		0	0	692968	161125
0.76_867.07		[M-H]-		867.072	ESI neg	0.757	259000		578188		986780		188110		821013		590916		772958		671915		806602		1388271		1094672		784919		0	0	135625	52511
0.77_449.49		[M-H]-		449.488	ESI neg	0.769	155320		219131		144275		232461		125911		145425		184547		166585		207419		138154		184478		84871		0	0	181618	155954
0.77_463.49		[M-H]-		463.492	ESI neg	0.774	610631		525722		569858		440616		532251		517323		537724		534451		505599		501484		553358		542016		0	0	421245	521782
0.77_783.07		[M-H]-		783.069	ESI neg	0.767	43573836		25594072		38106060		14968342		36888124		31270474		36294000		40232888		35944388		47724676		43646628		51896884		8906	14219	16787690	16045186
0.77_805.05		[M-H]-		805.053	ESI neg	0.77	167581		129777		164123		79186		191231		170105		174758		198244		124415		172751		180362		222239		0	0	78640	114439
0.77_809.02		[M-H]-		809.021	ESI neg	0.769	495355		400205		634493		215480		300075		267129		394453		394067		548828		420918		459082		352382		0	0	223759	85659
0.77_851.05		[M-H]-		851.055	ESI neg	0.772	346985		269038		307701		206205		388891		338118		312909		362608		253571		328964		377014		374448		0	0	326791	318930
0.78_1175.11		[M-H]-		1175.11	ESI neg	0.782	778216		252440		716730		92995		508296		323108		478237		521885		466119		791270		662545		932434		0	0	49787	67188
0.78_527.06		[M-H]-		527.065	ESI neg	0.777	1728825		1369259		2211652		909701		1753253		1385773		1700266		1331588		1400993		1702327		1867610		1090102		2533	0	1528480	148999
0.78_794.06		[M-H]-		794.06	ESI neg	0.775	1007608		556411		786568		320068		945841		827921		802066		983555		674908		1022068		960809		1114013		0	0	278887	427282
0.78_832.02		[M-H]-		832.023	ESI neg	0.784	351957		286415		419980		138519		186127		175920		246922		217463		347888		254461		240536		223792		0	0	50403	70885
0.79_321.07		[M-H]-		321.073	ESI neg	0.788	267226		131041		423757		69550		202666		247820		259180		202736		248374		234878		276457		365493		0	0	159788	162594
0.79_809.52		[M-H]-		809.524	ESI neg	0.79	630788		447503		705590		267129		537010		364658		461545		446542		525747		508918		572883		493369		0	0	90328	158219
0.79_828.02		[M-H]-		828.018	ESI neg	0.791	214649		263992		247935		154149		175413		178397		208980		213073		276569		199252		198255		183062		0	0	65223	93993
0.80_191.02		[M-H]-		191.02	ESI neg	0.8	191993		113151		244674		150188		324229		166561		281581		193571		102224		142007		143495		251048		4681	9251	77322	53075
0.80_203.02		[M-H]-		203.02	ESI neg	0.797	126693		126583		157614		64764		164877		213269		225833		173605		179021		229665		255080		252652		0	0	78076	55902
0.80_391.03		[M-H]-		391.031	ESI neg	0.801	18028572		14388555		22157276		11416593		17073108		14811385		16497304		14518342		14957492		18409594		18287200		19834116		9888	44386	4890173	5182513
0.80_541.05		[M-H]-		541.055	ESI neg	0.796	1932426		1164664		1734806		759882		1449214		1480259		1143438		1307245		978832		1433167		1565778		1262242		0	0	1514828	970224
0.80_841.53		[M-H]-		841.527	ESI neg	0.798	168951		162685		171768		94444		145379		99694		135541		138376		179977		135781		159658		137455		0	0	31755	18471
0.81_440.99		[M-H]-		440.993	ESI neg	0.813	721776		1109259		841311		1002117		529448		724883		754057		735476		960995		664480		817196		548133		0	0	360426	176394
0.81_519.06		[M-H]-		519.057	ESI neg	0.806	233338		139501		221362		87558		204618		170400		118680		204502		117510		193633		197981		214266		0	0	152977	108768
0.81_801.08		[M-H]-		801.08	ESI neg	0.806	211657		403708		587142		269330		591168		557463		565211		555771		500684		840439		794390		917581		0	0	44399	36625
0.81_881.98		[M-H]-		881.985	ESI neg	0.812	177878		211800		200152		158750		168418		164500		153891		168979		200458		141206		168086		154543		0	0	52671	52443
0.81_919.10		[M-H]-		919.104	ESI neg	0.805	439930		197863		413252		105317		295969		317111		303189		279311		243103		400962		370531		286932		0	0	76234	7858
0.82_481.06		[M-H]-		481.062	ESI neg	0.819	811684		691522		1204140		441136		997813		1203810		1271387		1121001		834828		1521323		1538966		1589687		0	0	493710	493304
0.82_792.07		[M-H]-		792.074	ESI neg	0.817	96353		133185		228209		94893		223017		200136		191240		222540		187066		261031		276575		318411		0	0	0	6177
0.82_846.07		[M-H]-		846.065	ESI neg	0.82	275140		200278		302566		195533		296719		263216		233636		284762		224334		286953		308282		303601		0	0	56594	53426
0.82_867.07		[M-H]-		867.072	ESI neg	0.824	565401		368867		622287		178661		469784		615880		772958		634416		392442		1023863		1093361		1304208		0	0	59208	7097
0.83_400.04		[M-H]-		400.036	ESI neg	0.829	220080		449667		466703		429908		473500		776035		771036		787806		762681		918229		948356		1011032		0	0	114025	62325
0.83_475.03		[M-H]-		475.034	ESI neg	0.832	2883236		1637679		2041678		1065077		1656282		2650129		2758600		2620066		1543347		3906126		2433918		3890228		10759	2240	1870246	502613
0.83_933.09		[M-H]-		933.093	ESI neg	0.834	399755		155259		330366		109922		263346		175120		165292		193104		150352		259657		326163		225175		0	0	23220	13709
0.84_435.98		[M-H]-		435.98	ESI neg	0.844	281344		414294		200586		350175		110552		233434		233315		250606		269694		136876		277835		173077		0	0	105233	67632
0.84_951.08		[M-H]-		951.075	ESI neg	0.841	203798		230002		594175		138387		372116		290638		265181		310843		172261		319933		253847		515491		0	0	92887	22947
0.85_463.49		[M-H]-		463.492	ESI neg	0.852	382881		493961		418221		565360		452949		571971		566985		463117		495882		474388		509964		496688		0	1834	126708	110464
0.85_809.02		[M-H]-		809.021	ESI neg	0.855	179102		672612		634493		458292		409628		323800		545195		309364		859181		423332		559389		348162		0	0	2776	0
0.86_321.07		[M-H]-		321.073	ESI neg	0.863	136747		216852		423757		132883		355969		287182		444497		163928		473150		251416		379178		369064		0	0	32686	34204
0.86_331.07		[M-H]-		331.067	ESI neg	0.858	4807644		1540603		7091243		1007755		1902343		1938595		1665388		1561757		1396730		1631710		1463718		1773257		0	0	181950	243279
0.86_391.03		[M-H]-		391.031	ESI neg	0.861	9621668		17936232		22157276		14788414		20929418		17452364		20924232		14824226		22415058		18409594		21145640		19920608		5260	44386	2077137	1551141
0.86_394.06		[M-H]-		394.062	ESI neg	0.863	589912		156280		820939		82567		326232		267742		208209		194839		126683		209069		177548		233389		0	0	18433	28491
0.86_449.49		[M-H]-		449.488	ESI neg	0.858	176320		121712		89267		189561		71780		148457		156168		115621		94430		81477		89892		122089		0	0	61653	23223
0.86_527.06		[M-H]-		527.065	ESI neg	0.856	2746338		854596		1374501		655508		1088710		1910528		1986889		1551581		933131		1313368		1325960		1818718		0	0	2701224	1541712
0.86_819.05		[M-H]-		819.046	ESI neg	0.862	182600		323663		351024		285923		420319		370187		332915		400386		371457		413676		456268		416079		0	0	31929	38711
0.86_832.02		[M-H]-		832.023	ESI neg	0.864	94838		473607		419980		332619		243517		301385		371404		191834		607362		304307		339580		197522		0	0	288	0
0.86_880.98		[M-H]-		880.979	ESI neg	0.858	126572		293939		213765		265524		147794		169573		214144		140942		297321		162965		208374		128771		0	0	32227	4449
0.87_1175.11		[M-H]-		1175.11	ESI neg	0.866	59438		977307		1504265		420209		1327285		1255050		1327479		420054		1698313		2051495		1744051		800823		0	0	0	0
0.87_153.02		[M-H]-		153.019	ESI neg	0.873	486452		256121		577347		209754		404591		278533		332386		211828		269589		376155		273422		212088		75526	70389	372258	221173
0.87_191.02		[M-H]-		191.02	ESI neg	0.868	121891		83168		195527		114742		323453		168128		281581		143963		112054		149254		151006		202375		5090	7845	79285	53075
0.87_483.08		[M-H]-		483.078	ESI neg	0.868	1117951		503813		1633077		247738		1126329		498116		453608		457442		593036		602692		556204		601808		0	0	91828	67160
0.87_783.07		[M-H]-		783.069	ESI neg	0.866	14078234		46106072		60172140		31685112		61051852		59842156		57555688		33563940		61519408		75572904		65962660		49087008		6387	8949	1915316	1396704
0.87_794.06		[M-H]-		794.06	ESI neg	0.869	266109		871598		1027343		771657		1165816		1354919		1174086		836175		988038		1313776		1147469		1340608		0	0	8375	1501
0.87_801.08		[M-H]-		801.08	ESI neg	0.873	78072		218033		221343		164411		310311		556895		565211		557128		500684		611515		541641		917581		0	0	35835	7860
0.87_809.52		[M-H]-		809.524	ESI neg	0.872	119475		759902		705590		515524		537010		520559		643083		373106		903184		658060		602381		429590		0	0	1607	0
0.88_846.06		[M-H]-		846.064	ESI neg	0.881	119532		250611		215355		251062		348150		370669		328588		323840		265152		361752		324844		303601		0	0	26146	19701
0.88_851.06		[M-H]-		851.057	ESI neg	0.876	175194		270678		268013		328843		370861		377075		332669		357881		266095		296455		340128		377536		0	0	33752	20873
0.89_453.04		[M-H]-		453.038	ESI neg	0.885	527723		342629		618426		196816		454106		329652		333582		295482		300713		380242		543883		577484		0	0	539270	243039
0.89_475.03		[M-H]-		475.034	ESI neg	0.885	2883236		3138832		6524936		2263129		4503089		1478665		1823067		1674289		2477777		2064204		1927597		3890228		3595	8632	2348562	1028126
0.89_519.06		[M-H]-		519.056	ESI neg	0.887	482896		184713		432124		85635		364367		198266		154035		149206		144776		178925		210104		176703		0	0	92660	45723
0.89_536.07		[M-H]-		536.07	ESI neg	0.893	420710		175184		367642		144087		261398		257170		289743		198206		238902		213931		231973		285171		0	0	339327	180821
0.89_792.07		[M-H]-		792.073	ESI neg	0.89	12648		54090		72230		47132		125164		200136		238039		235292		120799		287031		239232		292197		0	0	1614	0
0.89_919.10		[M-H]-		919.105	ESI neg	0.89	169811		218674		361037		109704		333465		321082		398420		279311		293010		382277		358008		453879		0	0	16811	10546
0.89_933.10		[M-H]-		933.098	ESI neg	0.892	220442		236356		398094		109922		418230		270922		277624		220719		332017		323438		326163		231634		0	0	787	0
0.90_439.98		[M-H]-		439.985	ESI neg	0.904	443001		1194006		935871		1475971		763160		962881		931335		809237		1260841		765119		778234		836219		0	0	160392	59048
0.90_440.49		[M-H]-		440.487	ESI neg	0.9	209560		576121		402013		590077		305707		434372		482428		403832		562574		310851		316140		338317		0	0	62333	24672
0.90_867.07		[M-H]-		867.073	ESI neg	0.9	111582		576312		802261		299745		927574		600786		520144		415869		779065		733648		733357		806238		0	0	25732	7079
0.91_169.01		[M-H]-		169.014	ESI neg	0.914	515228		462352		587365		281428		738022		456663		492696		528843		472868		460783		393951		482289		186407	90709	324602	378490
0.91_463.49		[M-H]-		463.492	ESI neg	0.914	161322		493961		215651		519726		461682		571858		501927		461567		495882		383294		482940		511467		0	0	63736	43781
0.91_541.05		[M-H]-		541.055	ESI neg	0.912	5113504		2447659		7972059		1315104		3554464		1520687		1250409		1166318		1913298		1542371		1479082		1213344		0	0	504727	356615
0.91_880.98		[M-H]-		880.978	ESI neg	0.913	29209		163225		105682		265524		147794		180175		214144		160238		297321		166356		145467		142199		0	0	10445	1373
0.92_331.07		[M-H]-		331.067	ESI neg	0.921	1430276		4119367		7091243		2598795		6490346		2383989		1923617		1469218		4865138		2378546		2933957		1476702		0	0	96453	126723
0.92_368.10		[M-H]-		368.099	ESI neg	0.924	163837		205301		438267		279606		461893		172280		153378		15514		137992		92651		87942		15768		0	0	122486	54987
0.92_394.06		[M-H]-		394.063	ESI neg	0.924	177897		441905		820939		290450		935273		267742		232869		190776		520781		220987		354990		174053		0	0	1784	6817
0.92_527.06		[M-H]-		527.065	ESI neg	0.915	3523858		1545095		3587746		985089		2260176		1235347		1893484		1138265		1499413		1285735		1187233		1474576		0	0	1306535	1541712
0.93_153.02		[M-H]-		153.019	ESI neg	0.925	486452		532220		577347		343216		640652		366210		332386		314450		560889		376155		273422		403110		86512	70849	166617	221173
0.93_181.05		[M-H]-		181.051	ESI neg	0.928	118670		212513		208888		98709		142755		56218		62212		53303		198395		182651		197890		118334		0	1604	53687	88429
0.93_191.02		[M-H]-		191.02	ESI neg	0.931	102960		69597		129851		114742		188214		165210		266303		147142		91052		151351		146971		202375		6634	4375	57117	45841
0.94_1175.11		[M-H]-		1175.11	ESI neg	0.939	0		6173		781		4520		5629		1255050		1327479		1097165		117731		2051495		758081		1863492		0	0	0	0
0.94_321.07		[M-H]-		321.073	ESI neg	0.944	27729		43805		57523		8783		78163		472497		519495		331710		169850		394444		523274		586004		0	0	2202	4090
0.94_453.04		[M-H]-		453.039	ESI neg	0.938	878944		828783		1749755		401022		916166		329652		348525		295482		658933		534433		669419		339410		0	0	251915	243039
0.94_483.08		[M-H]-		483.078	ESI neg	0.935	431564		1092101		1633077		619754		2079069		718904		584972		543759		1317094		937368		1054432		527596		0	0	75704	25947
0.94_519.06		[M-H]-		519.059	ESI neg	0.943	485736		532069		903560		289774		875149		251958		210121		225369		564122		178925		407895		168839		0	0	65575	23080
0.94_525.00		[M-H]-		524.996	ESI neg	0.938	134900		468246		458154		287207		242760		11729		51645		0		682042		12026		144039		938		0	0	155305	16217
0.94_783.07		[M-H]-		783.069	ESI neg	0.941	3300289		7924138		7839004		5837818		10419742		59842156		57555688		57730312		16391774		75572904		65962660		69845096		3375	4136	1234588	700974
0.94_794.06		[M-H]-		794.06	ESI neg	0.945	21522		95351		30557		62733		144180		1354919		976450		1312263		196143		1313776		1094638		1305832		0	0	0	0
0.94_809.02		[M-H]-		809.021	ESI neg	0.939	4706		62878		10597		40515		33127		437582		545195		473132		201930		512326		471755		409257		0	0	0	0
0.95_425.03		[M-H]-		425.025	ESI neg	0.955	102684		107887		120508		106465		157531		271073		315168		368713		230820		297345		312447		397241		0	0	44379	32143
0.95_810.53		[M-H]-		810.529	ESI neg	0.951	6826		63910		11417		33750		25837		594793		565514		635846		160714		602130		584568		546864		0	0	0	0
0.95_846.06		[M-H]-		846.064	ESI neg	0.951	48501		56849		57021		56860		92734		370669		318139		384366		97534		342373		319296		364138		0	0	13284	6914
0.95_851.06		[M-H]-		851.057	ESI neg	0.951	66854		89189		94303		92584		140474		411339		336206		407201		111173		329411		301170		365133		0	0	31322	20873
0.95_919.10		[M-H]-		919.104	ESI neg	0.95	137012		107847		268729		49901		246350		281953		343060		281872		161916		339456		358008		359253		0	0	16811	4106
0.96_536.07		[M-H]-		536.07	ESI neg	0.963	548696		478119		731664		303276		627060		318763		338176		193832		593346		395158		663209		209797		0	0	81797	75736
0.96_933.10		[M-H]-		933.097	ESI neg	0.963	62383		137021		314625		45520		285088		313298		324736		356373		161872		447328		329600		346787		0	0	0	0
0.97_463.49		[M-H]-		463.492	ESI neg	0.974	102556		120785		96680		93342		123199		351352		501927		514994		147700		383294		200267		447072		0	0	62022	43781
0.97_541.05		[M-H]-		541.055	ESI neg	0.974	3271102		4929214		7972059		2780971		7879138		2764968		2682598		1178610		5358257		3227162		4499768		1134645		0	0	504727	256533
0.97_633.07		[M-H]-		633.073	ESI neg	0.969	687419		691494		1151902		509929		1571184		1159429		1161133		639172		1011242		1200850		1630544		597916		0	0	599150	167009
0.97_867.07		[M-H]-		867.072	ESI neg	0.973	110177		250402		378822		92250		417885		600786		735499		520277		437829		1103766		1155734		880812		0	0	6555	0
0.97_919.60		[M-H]-		919.605	ESI neg	0.971	118804		101001		235798		53372		225498		264952		294079		268561		137419		325408		292226		337079		0	0	3141	2123
0.98_439.99		[M-H]-		439.985	ESI neg	0.976	232120		423232		309455		341497		236026		846967		931335		927170		580452		676770		456096		647460		0	0	117352	41369
0.98_474.54		[M-H]-		474.542	ESI neg	0.978	133701		109160		155128		74662		257243		231389		148516		114547		132253		220438		302871		27366		0	0	118379	30798
0.98_475.03		[M-H]-		475.034	ESI neg	0.978	6445568		8654205		10744181		4698194		10399092		7554848		6467242		2029666		11146130		9608606		14161440		2327986		5253	16065	2463604	541243
0.99_153.02		[M-H]-		153.019	ESI neg	0.992	171946		247169		185841		188307		341651		558151		609769		426812		394710		657685		679868		536009		78282	78523	83898	116245
0.99_321.07		[M-H]-		321.073	ESI neg	0.991	13497		3390		30196		8783		30632		203991		519495		331710		48858		157777		134107		586004		0	0	2202	4090
0.99_435.98		[M-H]-		435.98	ESI neg	0.993	77112		136786		117141		115800		82525		189685		212156		212094		134431		165160		118950		166871		0	0	72555	12832
0.99_486.02		[M-H]-		486.024	ESI neg	0.992	452772		485888		581927		309664		608476		396170		409131		93156		603128		856669		753964		23549		0	0	201459	47332
0.99_519.06		[M-H]-		519.059	ESI neg	0.995	252908		532069		903560		289774		875149		486933		374624		225369		564122		937208		895290		226217		0	0	65575	23080
0.99_552.05		[M-H]-		552.046	ESI neg	0.991	208319		278006		451592		198822		471752		204472		172654		92054		251902		207642		411442		24233		0	0	52875	31835
1.00_169.01		[M-H]-		169.014	ESI neg	0.999	390712		270931		342947		183697		503938		659841		601980		539013		289245		605606		582718		464229		181461	86360	282393	345835
1.00_331.07		[M-H]-		331.067	ESI neg	0.998	448088		540277		562838		456016		883930		7295685		7165282		2551288		1121645		6735324		6223954		2429988		0	0	69386	65154
1.00_368.10		[M-H]-		368.099	ESI neg	1.004	321309		256278		407927		283460		461893		298408		251902		101394		204890		167413		277118		49164		0	0	91576	12211
1.00_394.06		[M-H]-		394.063	ESI neg	0.999	53573		57845		61966		42997		124267		1114482		940147		315802		107936		922608		812568		174850		0	0	1366	0
1.00_453.04		[M-H]-		453.039	ESI neg	1	878944		1341504		1749755		668809		1516912		687740		731310		292665		1529017		1285706		2313257		497031		0	0	133966	69142
1.00_487.11		[M-H]-		487.109	ESI neg	0.998	389535		103692		198653		109716		237566		268625		312793		104899		152046		232302		232801		116073		0	0	139076	0
1.00_523.99		[M-H]-		523.988	ESI neg	0.997	272404		474259		375150		215618		231545		152095		166386		41827		582142		225006		298407		32885		0	0	101976	8791
1.00_851.06		[M-H]-		851.058	ESI neg	1.004	66854		53155		73314		42916		89903		188489		188741		407201		66937		156687		120590		403070		0	0	26282	18814
1.01_181.05		[M-H]-		181.051	ESI neg	1.009	8911		26854		13440		4569		13913		128670		149391		145518		34089		270410		197890		353167		0	0	15392	11394
1.01_476.54		[M-H]-		476.538	ESI neg	1.011	254257		336169		407310		190540		390067		308033		352561		149450		448443		531496		569498		179800		0	0	120375	33817
1.01_483.08		[M-H]-		483.078	ESI neg	1.013	188220		239342		274291		166421		462263		1407180		1331878		734947		455600		2053024		1798684		839378		0	0	69647	27505
1.02_329.09		[M-H]-		329.088	ESI neg	1.019	0		777290		1415458		689677		1020832		134513		149167		5005		1330417		323322		541417		38392		0	0	0	0
1.03_525.00		[M-H]-		524.996	ESI neg	1.035	299985		498937		503340		283116		278230		261734		372269		178932		718504		524864		499564		172945		0	0	210809	60759
1.03_919.10		[M-H]-		919.104	ESI neg	1.027	137012		112347		157957		60749		246350		128131		181744		191462		189905		230926		358553		359253		0	0	1949	0
1.04_331.10		[M-H]-		331.104	ESI neg	1.045	0		339785		1098758		735585		394617		0		0		0		464085		23225		126167		32269		0	0	0	0
1.04_474.54		[M-H]-		474.542	ESI neg	1.038	204475		111270		155128		78690		220829		217290		138441		219574		110401		267155		234482		200236		0	0	117447	55050
1.05_475.03		[M-H]-		475.034	ESI neg	1.054	6445568		7620533		12921706		4713528		8976235		8664776		10201103		6106804		11095059		16066280		15177116		10078360		3583	22485	3141266	1531016
1.05_486.02		[M-H]-		486.024	ESI neg	1.047	452772		485888		614560		323710		618454		571298		587364		348547		603128		856669		773311		469355		0	0	248832	141101
1.05_536.07		[M-H]-		536.07	ESI neg	1.053	50178		48284		47826		8917		51572		545024		699360		503127		97075		782151		225041		768349		0	0	3310	10471
1.05_633.07		[M-H]-		633.073	ESI neg	1.055	1968613		1318888		2073907		672470		2896971		1145504		1122743		990072		1279348		1494933		1631388		1313831		0	2057	591899	283983
1.06_153.02		[M-H]-		153.019	ESI neg	1.065	101226		104237		113449		92832		162748		324565		351928		458568		136599		306213		222229		679439		77029	71203	61670	98448
1.06_331.07		[M-H]-		331.067	ESI neg	1.064	276265		169575		219367		115836		222085		2716688		7165282		5700054		242960		1929521		804653		7029154		0	0	53718	65154
1.06_466.03		[M-H]-		466.028	ESI neg	1.06	295484		291226		436396		204827		373561		209239		246903		190703		368037		372457		399214		353911		0	0	221559	51351
1.06_523.99		[M-H]-		523.988	ESI neg	1.061	212670		361515		311982		215618		203420		217739		291400		136370		586515		426706		355624		225730		0	0	119202	32525
1.07_329.09		[M-H]-		329.088	ESI neg	1.075	24476		777290		1355310		689677		936788		569146		531830		7790		1330417		1052460		1360289		40918		0	0	15447	0
1.07_377.11		[M-H]-		377.109	ESI neg	1.071	0		217125		692600		465419		251109		26509		118510		95705		642439		117383		353017		483514		0	0	0	0
1.07_453.04		[M-H]-		453.039	ESI neg	1.067	323709		792997		949012		426503		812115		1299321		1547399		750840		864263		2482178		2313257		1103817		0	0	133966	62810
1.08_541.05		[M-H]-		541.055	ESI neg	1.077	1619314		1451596		1777204		731181		1890888		6619507		5975417		3463782		1656906		7820462		7654994		3444926		0	0	199227	174547
1.09_519.06		[M-H]-		519.059	ESI neg	1.09	195985		294505		433950		141032		436041		733513		610235		541530		325218		928106		552585		546918		0	0	27423	15249
1.10_476.54		[M-H]-		476.538	ESI neg	1.098	277782		400230		506947		257805		509640		347542		401990		373402		590083		655684		558482		543004		0	0	88964	53165
1.10_484.04		[M-H]-		484.039	ESI neg	1.096	158922		184214		191249		115852		183366		213017		219034		201919		268735		412327		392536		355439		0	0	56334	29601
1.10_519.98		[M-H]-		519.982	ESI neg	1.101	164510		284306		255377		193352		179308		121355		159671		152688		363745		201787		208560		114443		0	0	67705	28905
1.11_398.02		[M-H]-		398.02	ESI neg	1.109	72928		100810		58747		51819		86705		64545		90584		58360		140685		70525		111376		83863		0	0	47140	20489
1.11_527.06		[M-H]-		527.065	ESI neg	1.109	466673		335711		332793		319522		419394		6760778		8023443		2405320		667109		7550445		7066868		2940171		0	0	63807	58329
1.11_633.07		[M-H]-		633.074	ESI neg	1.114	1968613		1318888		2073907		1131629		2896971		1145504		1122743		1047405		2311048		1494933		3976539		1313831		0	0	376739	283983
1.12_474.54		[M-H]-		474.541	ESI neg	1.121	415784		196566		311056		155865		467347		225610		117266		209628		240620		216573		604399		143475		0	0	80154	30649
1.12_486.02		[M-H]-		486.025	ESI neg	1.119	496725		612982		788131		452825		863266		496867		543539		619917		744719		875349		1023375		817710		0	0	148463	109642
1.12_951.08		[M-H]-		951.075	ESI neg	1.118	1370312		1920350		2630925		1116745		2802484		1273660		1493456		1411931		3649389		2952963		5584842		2724203		0	1947	268729	229488
1.13_453.04		[M-H]-		453.039	ESI neg	1.134	733038		705162		949012		410370		984408		839178		1547399		1388920		952855		1352952		1240516		2337798		0	0	117665	36197
1.14_377.11		[M-H]-		377.109	ESI neg	1.14	150453		206436		727563		500583		321601		141651		133063		127793		642439		926920		1127144		584609		0	0	26238	0
1.14_487.11		[M-H]-		487.109	ESI neg	1.139	476428		177113		416520		192665		479638		263406		314485		182939		235842		238402		264048		206226		0	0	189832	9243
1.16_331.10		[M-H]-		331.103	ESI neg	1.155	412273		374136		1014715		872340		557588		491756		362560		0		1036319		1288124		1592133		50588		0	0	100399	0
1.16_365.06		[M-H]-		365.064	ESI neg	1.163	339329		173545		891268		155721		253275		205893		218567		34334		230910		242740		202226		88260		0	0	80273	0
1.16_519.06		[M-H]-		519.059	ESI neg	1.159	430020		237890		365714		137951		418533		520291		470983		717190		288344		621864		549041		777674		0	0	27423	7309
1.16_519.98		[M-H]-		519.982	ESI neg	1.156	92022		284306		166038		193352		179308		121355		139361		152688		363745		238112		216237		170695		0	0	35477	3304
1.17_329.09		[M-H]-		329.088	ESI neg	1.173	4185766		3309515		6056642		1187534		4457982		1577480		1431404		442867		1840736		1828086		1515298		1014312		0	0	612979	0
1.17_373.11		[M-H]-		373.114	ESI neg	1.174	428464		118737		577821		81693		445531		96751		185657		47891		163231		151787		163481		96390		0	0	48137	0
1.17_375.09		[M-H]-		375.093	ESI neg	1.172	1061601		831771		1522172		280583		1123891		386146		362906		94800		450500		453082		338354		238126		0	0	145788	0
1.17_466.03		[M-H]-		466.028	ESI neg	1.168	649235		952104		1104779		735625		1277014		381166		407891		283310		1484813		677956		1947124		511613		0	0	226769	127152
1.17_474.54		[M-H]-		474.542	ESI neg	1.174	489777		196566		382329		146873		590749		392714		370684		217523		248924		434896		604399		143475		0	0	100431	26071
1.17_527.06		[M-H]-		527.065	ESI neg	1.17	137352		83504		103985		87608		131630		1870566		8023443		6764442		128890		1646061		343197		9135622		0	0	43245	26507
1.17_933.06		[M-H]-		933.064	ESI neg	1.173	151217		253937		345740		190410		425056		109680		108628		7513		433304		213790		749923		72084		0	0	43185	16510
1.19_398.02		[M-H]-		398.02	ESI neg	1.188	15336		22732		14468		10448		23565		97098		134979		102696		31244		114140		111111		132447		0	0	20419	4410
1.19_633.07		[M-H]-		633.073	ESI neg	1.194	421996		1861826		7216705		1287016		3773105		3496692		3726906		1615921		1219763		4270058		3976539		2087479		2568	0	135696	82865
1.20_475.03		[M-H]-		475.034	ESI neg	1.199	2452244		5173084		6882799		3052568		6777496		13967908		16603687		8206680		6724698		22762930		19983610		14750913		20763	54129	769878	384868
1.20_486.02		[M-H]-		486.024	ESI neg	1.197	170277		295841		363430		199095		425028		934087		907463		602476		301853		1134876		1023375		829038		3440	0	60351	31429
1.20_523.99		[M-H]-		523.988	ESI neg	1.2	53094		98526		71146		59673		45582		209406		313134		166214		149415		373511		149080		314974		0	0	17926	2417
1.21_299.08		[M-H]-		299.077	ESI neg	1.208	1465676		1071535		1411210		467408		965078		536757		430391		27813		1982965		688088		1319079		64085		0	0	7726	3086
1.21_377.11		[M-H]-		377.109	ESI neg	1.211	536792		679721		2131659		1475676		825961		314431		351695		116818		1869371		926920		2954778		530895		0	0	731962	0
1.21_550.11		[M-H]-		550.105	ESI neg	1.21	520071		217399		442680		300962		584223		51658		35087		74412		243909		39490		100281		53298		0	0	213716	4482
1.22_206.05		[M-H]-		206.046	ESI neg	1.216	693392		198755		943752		436653		919466		153144		169037		68565		791743		111879		440618		54004		0	0	2254	0
1.22_367.08		[M-H]-		367.08	ESI neg	1.216	122739		161408		489376		431292		191347		65992		80522		134058		437150		191438		638648		165184		0	0	191479	0
1.22_483.08		[M-H]-		483.078	ESI neg	1.215	626499		538883		871469		346212		936737		591251		542344		503534		700108		1416745		1150217		664089		0	0	83151	28360
1.22_527.07		[M-H]-		527.065	ESI neg	1.224	96968		76892		2278494		71099		150001		326082		571477		6764442		72518		276395		116556		9135622		0	0	43245	14705
1.22_611.07		[M-H]-		611.068	ESI neg	1.22	812786		525738		1204312		399833		898711		331107		370174		13073		309370		476155		538615		49377		0	0	12576	0
1.23_365.06		[M-H]-		365.064	ESI neg	1.232	663151		491296		891268		487944		647380		322230		250300		288904		738189		344321		772460		364862		0	0	373154	3607
1.23_375.09		[M-H]-		375.093	ESI neg	1.227	1061601		831771		1522172		705938		1123891		386146		456430		498740		1298043		453082		1338709		664800		0	0	605300	4192
1.23_392.03		[M-H]-		392.034	ESI neg	1.227	519464		539035		715231		439393		764670		760008		782987		723903		756080		736556		902950		924324		0	0	227895	67044
1.23_474.54		[M-H]-		474.542	ESI neg	1.231	489777		261580		382329		194823		590749		653941		370684		372315		319117		585621		633843		511964		0	0	176131	40182
1.24_169.01		[M-H]-		169.014	ESI neg	1.238	319244		241927		297902		175137		451187		369699		340845		497665		220931		367003		312023		458679		173872	117620	376799	228867
1.24_316.03		[M-H]-		316.033	ESI neg	1.235	119219		3127282		3850265		1783751		3214948		194507		334308		199996		3325191		484788		4818886		176990		0	1920	11527	3708
1.24_335.09		[M-H]-		335.089	ESI neg	1.24	216165		109254		205416		56599		155027		243215		279467		2454		200778		151318		166747		3478		0	0	67561	1191
1.24_373.11		[M-H]-		373.114	ESI neg	1.235	428464		340246		577821		234736		445531		167373		185657		198095		542940		189601		712827		226027		0	0	245024	287
1.24_487.11		[M-H]-		487.109	ESI neg	1.24	3237553		1919808		3796398		2246908		4465798		795393		814801		560253		2456904		653287		3787668		554366		0	0	1225889	123815
1.24_556.06		[M-H]-		556.06	ESI neg	1.24	658982		617396		909040		301647		852452		437410		405845		270778		354635		262341		392808		282298		0	0	140017	9331
1.24_671.10		[M-H]-		671.098	ESI neg	1.243	368944		200203		328291		153031		282401		267545		262753		162872		232119		214319		305756		277282		0	0	2351	0
1.25_398.02		[M-H]-		398.02	ESI neg	1.251	15336		33074		14742		25597		32760		35721		161991		167225		31244		35186		33257		221056		0	0	21455	1259
1.25_400.04		[M-H]-		400.036	ESI neg	1.253	500016		550144		692616		360373		670817		643291		616906		703851		671784		836077		798760		936288		0	0	329697	52138
1.25_477.03		[M-H]-		477.031	ESI neg	1.247	97412		120648		181633		135565		129138		51302		142068		159147		262320		197691		249246		241412		0	0	81450	1775
1.25_519.06		[M-H]-		519.06	ESI neg	1.254	1012591		553217		921951		305871		738043		845360		470983		717158		564322		998765		939466		596525		0	0	281202	21405
1.25_550.11		[M-H]-		550.105	ESI neg	1.251	520071		217399		442680		300962		584223		138308		117564		74412		243909		104441		458026		53298		2704	0	213716	26032
1.26_345.05		[M-H]-		345.046	ESI neg	1.265	399838		181453		259802		130922		296218		503127		479186		493947		170580		323357		239005		439017		0	0	146020	47930
1.26_368.10		[M-H]-		368.099	ESI neg	1.263	117553		73392		91516		64801		119761		758233		715609		477383		94441		347964		131696		414054		0	0	158871	77293
1.26_519.98		[M-H]-		519.982	ESI neg	1.261	283898		241599		221595		207601		122988		105610		214064		162121		151493		112062		135194		128173		0	0	14455	1971
1.26_951.07		[M-H]-		951.075	ESI neg	1.257	2760992		1675952		2952382		905955		2625331		1634226		4025248		4519118		2204962		2482751		1800635		8677957		0	0	169021	38391
1.27_299.08		[M-H]-		299.077	ESI neg	1.273	487695		321628		346919		202187		328879		1335805		1056431		768127		1982965		1563372		1319079		3508331		0	0	556057	257190
1.27_367.08		[M-H]-		367.08	ESI neg	1.266	122739		20431		22026		431292		13986		193850		187371		134058		437150		482497		638648		348985		0	0	191479	124999
1.27_453.04		[M-H]-		453.039	ESI neg	1.271	1750287		1205264		1878300		799769		1557779		1557537		1662571		1648595		1230359		1977554		1860345		2066855		3684	2957	305210	126224
1.27_466.03		[M-H]-		466.028	ESI neg	1.274	1155481		1086600		1349500		834706		1187588		1400728		1447558		1697160		1530622		2161958		1810979		2667468		0	0	247278	62318
1.27_475.03		[M-H]-		475.034	ESI neg	1.267	19880034		11715396		18233630		7946433		15822000		9607645		10067783		16997180		12623485		10817690		17982656		25494122		48937	84656	2196762	287536
1.27_481.06		[M-H]-		481.062	ESI neg	1.275	427616		349799		487184		234613		563883		507426		603209		703145		383022		775998		660576		715483		0	2477	343128	475593
1.27_486.02		[M-H]-		486.024	ESI neg	1.266	1137021		650495		746166		508254		839995		551488		558400		875538		541166		457878		669872		1080405		2872	2283	171539	33813
1.27_525.00		[M-H]-		524.996	ESI neg	1.274	834436		742386		694813		462496		419265		273743		355285		483308		767521		257768		464556		513702		5083	1427	201710	2979
1.28_361.11		[M-H]-		361.114	ESI neg	1.28	3965		0		1120		744		0		773254		920015		727227		0		840430		9095		1274881		0	0	8453	29842
1.28_439.98		[M-H]-		439.985	ESI neg	1.276	307370		437252		331355		333901		243081		309834		384935		300098		541658		291594		311983		273024		0	0	267024	33972
1.28_483.08		[M-H]-		483.078	ESI neg	1.28	1544806		941198		1391036		620873		1626317		1111923		1167409		898367		1223896		1416745		1664760		1940126		0	0	751789	50665
1.28_867.07		[M-H]-		867.072	ESI neg	1.277	928819		608811		1144113		320851		1104856		603458		661690		853117		799293		816029		1400028		1268930		0	0	86073	0
1.28_933.06		[M-H]-		933.064	ESI neg	1.282	537535		456829		660850		305505		680986		502406		530688		645188		726009		874676		587700		1169385		0	0	41570	11779
1.29_335.09		[M-H]-		335.089	ESI neg	1.29	216165		109254		205416		56599		155027		292390		351558		110140		200778		230631		189299		328845		0	0	200309	24195
1.29_474.54		[M-H]-		474.542	ESI neg	1.292	10118		32484		34643		12956		34278		678449		372793		751462		29552		717027		633843		561359		0	0	57909	98396
1.29_611.07		[M-H]-		611.068	ESI neg	1.29	812786		1778275		2950224		1260176		2438798		783198		808959		459265		1718320		2862254		2706119		587865		0	0	406164	3942
1.29_680.10		[M-H]-		680.102	ESI neg	1.292	328610		218806		390931		194200		328664		117837		172133		95993		277151		164956		370829		205115		0	0	163211	0
1.29_783.57		[M-H]-		783.571	ESI neg	1.291	483202		501890		779327		252593		903468		853676		1061255		1324568		822134		1528323		1356734		2341462		0	0	155163	12436
1.29_801.08		[M-H]-		801.081	ESI neg	1.294	334033		222025		405197		168642		383306		360490		435603		409734		293481		591387		447689		566782		0	0	138260	64331
1.30_460.03		[M-H]-		460.028	ESI neg	1.297	43826		97860		74026		101413		116000		72710		74732		55610		88832		110839		118445		79586		0	0	62981	28347
1.30_469.03		[M-H]-		469.032	ESI neg	1.3	9479		67633		19478		40493		79315		0		0		0		53726		23354		77863		25542		0	0	98999	30272
1.30_792.07		[M-H]-		792.075	ESI neg	1.3	380864		183655		381007		90712		359605		123259		137540		108274		188246		190940		416952		148369		0	0	109699	0
1.31_167.03		[M-H]-		167.035	ESI neg	1.315	6982		8469		16966		12520		17595		462183		462782		454940		16796		601045		22207		707859		1253	10250	29384	128169
1.31_316.03		[M-H]-		316.033	ESI neg	1.309	9839992		7270574		8636252		4927802		7376224		3994481		5029476		1297455		6874366		4749190		4818886		1655395		0	7408	6111704	6643
1.31_375.09		[M-H]-		375.093	ESI neg	1.314	28525		23847		46885		19165		31470		1368649		1409662		1380334		25839		1777784		76194		1994581		0	0	77950	314668
1.31_391.03		[M-H]-		391.031	ESI neg	1.307	4977802		5140592		6019482		3916360		7047142		7151692		7914079		8639209		6389358		9461548		8452689		12069185		37490	37425	3336275	1518726
1.31_400.04		[M-H]-		400.036	ESI neg	1.308	500016		698148		626046		381742		670557		638550		689514		703851		632028		878441		798760		936288		0	0	329697	189306
1.31_671.10		[M-H]-		671.096	ESI neg	1.307	368944		200203		328291		153031		282401		370053		405297		237813		232119		397828		305756		277282		0	0	150188	69390
1.32_246.10		[M-H]-		246.098	ESI neg	1.321	183247		251255		209739		66156		409473		54629		0		0		828548		114903		483439		0		0	0	309	0
1.32_321.07		[M-H]-		321.073	ESI neg	1.318	438186		383707		642252		334075		343042		181754		256953		181973		491453		189319		215037		363887		0	0	13323	29579
1.32_329.09		[M-H]-		329.088	ESI neg	1.317	110420		108714		195560		120561		126534		5398796		5698714		5446974		163414		7149260		292103		7787942		0	0	290047	1247669
1.32_331.10		[M-H]-		331.103	ESI neg	1.322	2272937		2165859		3670535		1480617		1837644		1442528		1509254		1977367		3207478		3636938		2653849		5574559		0	0	95063	593146
1.32_365.06		[M-H]-		365.064	ESI neg	1.316	8752		415		7553		7314		3006		836557		697083		724835		5439		1017276		11987		1096256		0	0	42956	249686
1.32_373.11		[M-H]-		373.114	ESI neg	1.321	24339		3134		15696		11385		8901		529557		685661		561981		34941		678551		75843		743737		0	0	26591	138065
1.32_453.04		[M-H]-		453.039	ESI neg	1.325	1750287		1205264		1075079		799769		1557779		1858873		1874498		1648595		1230359		1822916		1860345		2066855		2940	6195	929266	463165
1.32_486.02		[M-H]-		486.025	ESI neg	1.324	1137021		650495		348726		508254		839995		958351		749386		429907		541166		667812		669872		425697		2872	2994	756734	33813
1.32_501.99		[M-H]-		501.993	ESI neg	1.32	266306		234397		209692		169256		123473		176609		143013		97113		243417		138876		134513		65054		0	0	183558	804
1.32_519.06		[M-H]-		519.06	ESI neg	1.318	142444		67187		61706		47647		121099		845360		824997		903154		41463		998765		207128		823592		0	0	122596	130365
1.32_525.00		[M-H]-		524.996	ESI neg	1.32	834436		742386		694813		462496		419265		486077		547253		256934		767521		388122		464556		225832		5083	2708	584394	20442
1.32_556.06		[M-H]-		556.06	ESI neg	1.316	658982		617396		909040		514807		852452		1051880		1063361		449553		706089		894810		982369		534618		0	0	398095	216831
1.32_708.07		[M-H]-		708.072	ESI neg	1.322	442787		490921		757438		230660		713710		296998		380855		447122		585573		520523		922762		358927		0	0	176881	0
1.32_785.08		[M-H]-		785.075	ESI neg	1.323	699709		769763		1067568		532294		966269		1074744		1188178		1332110		1067659		1474893		1255111		1658044		0	0	352060	187774
1.33_169.01		[M-H]-		169.014	ESI neg	1.332	259435		192421		219525		145190		335097		313503		226377		375656		182384		242978		211696		310913		199533	102536	261105	444556
1.33_345.08		[M-H]-		345.083	ESI neg	1.333	300895		187551		342962		152411		249844		287365		143354		98493		320556		186502		315400		167912		0	0	14790	14266
1.33_466.03		[M-H]-		466.028	ESI neg	1.334	1155481		1086600		1349500		834706		1187588		1278745		1297208		1697160		1530622		1704586		1810979		2667468		0	0	913202	111553
1.33_475.03		[M-H]-		475.034	ESI neg	1.327	19880034		11715396		18233630		7946433		15822000		19060690		18544666		9860380		12623485		17955002		17982656		12292993		75622	90623	10462698	5557034
1.33_487.11		[M-H]-		487.109	ESI neg	1.328	79590		62049		94704		64989		123738		4879498		5889710		5274746		71172		4476106		180585		4500370		0	0	106725	780520
1.33_519.98		[M-H]-		519.981	ESI neg	1.334	283898		241599		221595		207601		122988		161159		139278		113864		98833		109223		135194		31886		0	0	232828	93007
1.33_523.09		[M-H]-		523.086	ESI neg	1.327	2522		0		0		0		3240		449546		518671		477400		0		411443		3910		405624		0	0	2548	90124
1.33_550.11		[M-H]-		550.105	ESI neg	1.329	0		0		0		1097		3661		631021		690156		643400		0		513705		1404		504641		2704	0	2195	123134
1.33_867.07		[M-H]-		867.072	ESI neg	1.332	928819		608811		1144113		320851		1104856		1299892		1344306		853117		799293		1561744		1400028		1268930		0	0	343628	98681
1.34_299.08		[M-H]-		299.077	ESI neg	1.341	73519		37410		54936		26080		40603		316228		376916		1376852		83152		310279		113424		3508331		0	0	181197	257190
1.34_305.09		[M-H]-		305.088	ESI neg	1.341	200326		3292		3390		6906		7992		243237		268596		200823		19256		279646		291238		353519		0	0	140942	83503
1.34_345.12		[M-H]-		345.119	ESI neg	1.34	548104		377353		524561		325646		501932		213491		185479		931		396575		218533		534381		4361		0	0	290358	0
1.34_933.06		[M-H]-		933.065	ESI neg	1.337	537535		456829		660850		305505		680986		714830		715679		593354		726009		1150458		1093276		1169385		0	0	316573	155028
1.35_1055.14		[M-H]-		1055.14	ESI neg	1.354	386408		210206		418813		125832		350705		202279		189260		24123		291935		229455		396109		47303		0	0	141171	0
1.35_335.09		[M-H]-		335.089	ESI neg	1.352	97594		57069		104447		51360		81635		292390		351558		227515		88825		230631		96275		334480		0	0	57221	81725
1.35_389.07		[M-H]-		389.073	ESI neg	1.35	533951		377990		628183		239741		670127		227370		255831		282993		510930		249820		734285		232843		0	0	234763	0
1.35_469.00		[M-H]-		469.005	ESI neg	1.353	919352		854783		1212216		508227		1290504		7949753		9440862		9254456		914374		10783967		1629768		10871257		0	3362	872286	663492
1.35_474.54		[M-H]-		474.542	ESI neg	1.347	103050		87146		102958		12956		127141		82500		54663		670614		98363		97432		187397		561359		0	0	4114	14912
1.35_527.06		[M-H]-		527.065	ESI neg	1.352	5385288		3254987		5079036		2198704		4286862		2232038		2262020		386770		3316853		2074272		4310494		641963		0	2315	2527975	46364
1.35_783.57		[M-H]-		783.571	ESI neg	1.348	483202		658789		960617		396730		1027593		948459		1160137		1509778		1094659		1766525		1268983		2123604		0	0	291375	52956
1.36_316.03		[M-H]-		316.033	ESI neg	1.356	9839992		7270574		8636252		4927802		7376224		7931295		9856654		8337638		6874366		9544896		10319151		9771517		0	4217	6111704	3112450
1.36_439.99		[M-H]-		439.985	ESI neg	1.359	222152		442937		249706		331764		229528		206201		223483		250698		450883		245804		211200		209552		3637	0	284929	87446
1.36_655.06		[M-H]-		655.055	ESI neg	1.364	112111		215520		31647		170649		258719		263755		267898		136687		171611		260909		252609		231528		0	0	201384	117066
1.36_696.07		[M-H]-		696.069	ESI neg	1.357	241764		172533		152082		113894		297687		276366		279193		120225		170266		271513		273936		280493		0	0	129391	63713
1.36_907.09		[M-H]-		907.086	ESI neg	1.358	388694		340393		461783		143637		446405		436100		212433		53774		433698		748125		676076		105335		0	0	4066	1650
1.37_1003.11		[M-H]-		1003.11	ESI neg	1.371	332179		221784		441375		135400		381025		199934		214629		201786		272761		231239		463549		293792		0	0	133697	1617
1.37_315.11		[M-H]-		315.109	ESI neg	1.37	1352835		827276		1264576		629684		1077696		1158667		210513		1158		846611		362562		1194680		1216		0	0	823746	0
1.37_343.10		[M-H]-		343.103	ESI neg	1.366	282189		351625		487091		232570		338002		136184		100293		6570		606594		178976		680189		29559		0	0	477	1529
1.37_349.07		[M-H]-		349.07	ESI neg	1.371	653026		246504		441732		391131		436857		228799		111299		0		397108		188273		511846		1003		0	0	349608	0
1.37_359.10		[M-H]-		359.099	ESI neg	1.372	2876216		1348213		2699844		1779711		2509565		1137427		788356		4309		2249278		1402541		3026936		28473		0	0	1465408	0
1.37_376.09		[M-H]-		376.088	ESI neg	1.372	344399		134265		257623		203901		266094		121623		68220		208982		204431		119049		287825		312656		0	0	2832	243
1.37_611.07		[M-H]-		611.068	ESI neg	1.366	10169103		5536360		9050946		4168924		8177846		3482353		3584333		2435524		5051073		2862254		7722266		2928299		0	1601	4851309	183688
1.37_867.57		[M-H]-		867.574	ESI neg	1.366	171560		240109		410624		145671		418833		1039620		1065155		1144671		338822		1290562		487463		1543869		0	0	293143	84011
1.38_345.05		[M-H]-		345.046	ESI neg	1.379	155806		116539		136182		78037		167561		222766		266029		438920		122274		181925		144072		247625		0	0	224638	188127
1.38_467.04		[M-H]-		467.036	ESI neg	1.383	1363339		894736		1180865		636652		1662398		1354926		610949		334987		1059884		1326502		1263364		442958		0	0	167823	90231
1.38_481.06		[M-H]-		481.062	ESI neg	1.375	418909		318824		469231		195576		451094		429169		505493		487603		386126		547285		563854		498826		0	5813	268696	286200
1.38_792.07		[M-H]-		792.075	ESI neg	1.378	44576		46886		106443		30096		119508		385155		462828		409285		73263		452123		140203		508375		0	0	109699	10835
1.38_867.07		[M-H]-		867.072	ESI neg	1.382	233080		365010		677923		247658		893558		1299892		1344306		1315694		496488		1561744		745861		1876998		0	0	114293	98681
1.38_928.11		[M-H]-		928.109	ESI neg	1.378	449289		156791		333030		72498		409541		249681		313105		122908		218821		413908		326759		136176		0	0	123760	0
1.39_169.01		[M-H]-		169.014	ESI neg	1.388	281467		185328		214511		146026		364968		260642		226377		317469		176390		240065		222476		307630		154352	96461	261105	392296
1.39_246.10		[M-H]-		246.098	ESI neg	1.394	2261		1696		0		0		7700		316259		26740		280686		38816		473870		32253		880702		0	0	214303	82083
1.39_347.10		[M-H]-		347.098	ESI neg	1.389	2157		533		9586		1780		0		732360		863657		766193		3650		568092		14042		777783		0	0	359644	166278
1.39_391.03		[M-H]-		391.031	ESI neg	1.391	4942358		6039590		6788311		4663103		7045020		7266228		7510110		8269286		7014244		9358897		8129036		9986129		43147	49937	4407574	2973273
1.39_460.03		[M-H]-		460.029	ESI neg	1.392	97426		123638		67858		92782		75448		86469		154725		142726		110840		138806		122294		191243		0	0	221151	93524
1.39_466.03		[M-H]-		466.028	ESI neg	1.391	59247		66451		65201		63470		83313		1278745		1297208		1450047		103277		1704586		131049		2335842		0	1779	189033	540934
1.39_536.07		[M-H]-		536.07	ESI neg	1.388	2131586		1309988		1988089		1039542		1719581		475942		41099		39810		1765379		1977770		1925304		96074		3068	0	39799	23221
1.39_933.06		[M-H]-		933.065	ESI neg	1.39	11401		11393		688		8314		10591		714830		715679		896473		11119		1150458		40941		1516156		0	0	316573	155028
1.39_935.08		[M-H]-		935.081	ESI neg	1.389	194992		111708		159648		61626		260800		151433		149970		138744		142620		203060		203344		229500		0	0	44180	13236
1.39_951.08		[M-H]-		951.075	ESI neg	1.387	1384663		1312098		3283333		1337515		4172064		3240688		3306473		3498775		1971073		4011878		3667224		5036238		0	1764	450221	424315
1.40_307.01		[M-H]-		307.01	ESI neg	1.395	222012		175014		297898		65406		415848		354275		133462		17388		274614		609279		488228		39226		0	0	83049	0
1.40_321.03		[M-H]-		321.025	ESI neg	1.4	240279		55378		124375		54880		432093		249479		160215		0		139228		160507		132681		0		0	0	6324	0
1.40_331.10		[M-H]-		331.103	ESI neg	1.398	92595		52577		108393		67768		48260		2561074		2875774		2495143		132744		2914890		2653849		4578087		0	0	1792911	851325
1.40_400.04		[M-H]-		400.036	ESI neg	1.395	750114		681885		822753		531686		802924		757696		804815		651714		846517		977001		936074		924876		0	0	393843	198627
1.40_475.03		[M-H]-		475.034	ESI neg	1.398	6128952		13042972		19435970		12623929		23598388		19060690		18544666		18238306		29608746		17955002		39530924		20653824		66282	125820	2848965	5557034
1.40_486.02		[M-H]-		486.025	ESI neg	1.399	991397		834536		875498		1093021		1164840		958351		749386		774053		689896		667812		848942		727604		0	5412	240698	533378
1.40_501.99		[M-H]-		501.993	ESI neg	1.399	183248		261851		176818		256357		153173		176609		55705		99431		234953		43801		118431		98795		0	0	38163	58264
1.40_525.00		[M-H]-		524.996	ESI neg	1.401	663656		948066		674377		1029896		551869		161047		547253		412992		857306		188760		500152		317757		1485	5860	141532	208009
1.40_532.05		[M-H]-		532.05	ESI neg	1.402	585451		279887		340653		218453		363184		399739		376202		446486		341404		451165		561170		467081		0	0	28115	103179
1.40_551.04		[M-H]-		551.039	ESI neg	1.404	2511126		1528423		1883443		1341439		2398096		2133450		1694836		322958		2562644		2633277		2987242		602328		0	0	1434201	12180
1.40_556.06		[M-H]-		556.06	ESI neg	1.395	1474148		1037910		1269304		767697		1131724		1051880		1081048		1036811		946698		1282870		1372270		1077398		0	0	378056	216831
1.41_345.12		[M-H]-		345.119	ESI neg	1.41	4693		479		2251		4078		1917		574253		626624		643523		3130		573421		15520		583918		0	0	290358	134547
1.41_389.07		[M-H]-		389.073	ESI neg	1.408	21359		10854		23568		5868		24322		722097		862076		752005		510930		866767		734285		812664		0	0	234763	98421
1.41_462.04		[M-H]-		462.043	ESI neg	1.407	456430		453697		502156		284755		465871		480180		495573		357817		517582		681529		676398		729373		0	0	172709	24311
1.41_469.00		[M-H]-		469.005	ESI neg	1.409	1073256		854783		1212216		508227		1290504		1387202		1532717		2364598		914374		1642234		1629768		1859232		0	6632	488632	238711
1.41_669.05		[M-H]-		669.05	ESI neg	1.409	38431		124988		115829		129078		127179		472125		469300		455670		67642		506213		81372		465656		0	0	42917	123279
1.41_696.07		[M-H]-		696.069	ESI neg	1.409	241764		12465		152082		22204		226439		215289		279193		332721		15749		271513		64287		280493		0	0	129463	63713
1.41_943.08		[M-H]-		943.079	ESI neg	1.412	155393		133020		197035		91529		312329		235433		32812		97692		245055		322201		331373		90606		0	0	66909	0
1.42_1055.14		[M-H]-		1055.14	ESI neg	1.417	18570		652		1726		3842		746		395081		455615		432281		2643		476142		396109		500505		0	0	141171	55602
1.42_137.02		[M-H]-		137.024	ESI neg	1.424	476880		543318		553705		335108		518770		495834		88706		113793		563204		631666		469141		126565		140982	138667	96087	115703
1.42_398.02		[M-H]-		398.02	ESI neg	1.423	77579		24261		7379		21889		83324		57008		115821		84125		84201		65203		7576		129436		0	0	88167	54874
1.42_439.98		[M-H]-		439.985	ESI neg	1.416	313370		374604		164293		425140		203898		206201		235692		184605		476750		245804		214642		148905		3637	9996	284929	110438
1.42_453.04		[M-H]-		453.039	ESI neg	1.417	4781516		2890418		3773695		2609118		3856009		874430		1050896		1789529		2978902		1557898		1397436		1991303		9711	3415	461203	249676
1.42_463.09		[M-H]-		463.089	ESI neg	1.417	24994		5384		17724		8819		1651		309942		303638		352034		28783		322285		325660		356816		0	0	151935	63392
1.42_470.01		[M-H]-		470.008	ESI neg	1.423	238103		201977		281903		106520		284019		328651		353188		448298		204005		367779		353336		446777		0	0	121056	44461
1.42_527.07		[M-H]-		527.065	ESI neg	1.415	476386		223282		220389		168428		207689		4562438		4940421		4573468		244081		5041809		4310494		4705380		0	0	2527975	1218184
1.42_541.05		[M-H]-		541.055	ESI neg	1.423	524051		303150		388245		280388		432176		396670		359671		238872		307438		394755		466985		405982		0	3585	142565	124078
1.42_589.07		[M-H]-		589.073	ESI neg	1.421	11418		145020		35770		88353		7657		256250		260657		212943		135365		216554		194072		197781		0	0	138945	72193
1.42_633.07		[M-H]-		633.074	ESI neg	1.422	20940074		8426855		8052302		6418080		8648114		19843214		16533557		30080740		6423114		17118018		8906855		30468722		7428	12151	9539604	3803357
1.42_801.08		[M-H]-		801.08	ESI neg	1.418	423818		360232		511890		240912		598240		546216		530823		639499		495425		750316		727076		806737		0	0	170067	85068
1.42_907.09		[M-H]-		907.086	ESI neg	1.423	383613		326002		325407		295426		343720		436100		477930		530271		313059		748125		396203		737608		0	0	122405	41713
1.43_1003.11		[M-H]-		1003.11	ESI neg	1.428	332179		22697		30522		135400		35642		413633		504886		429433		272761		574266		463549		519876		0	0	133697	40795
1.43_315.11		[M-H]-		315.109	ESI neg	1.434	57578		3381		5047		5711		11134		1158667		1327203		1277516		9277		1218279		44220		1389512		0	0	823746	392131
1.43_476.54		[M-H]-		476.538	ESI neg	1.428	636659		1127921		1315019		1102451		1555567		316625		289042		687251		1139494		454433		1560844		765035		0	466	103541	66414
1.43_481.06		[M-H]-		481.062	ESI neg	1.432	418909		191730		232604		177979		242709		429169		408823		445920		232818		547285		337573		494876		4794	5813	235620	286200
1.43_611.07		[M-H]-		611.068	ESI neg	1.43	10169103		5536360		336198		4168924		425637		8861767		9323979		8327391		5051073		8444466		7722266		8020154		0	1764	4851309	2563506
1.43_631.06		[M-H]-		631.059	ESI neg	1.429	393861		294584		300074		282462		392071		44553		50674		41899		255263		331447		313703		66063		0	0	21071	11707
1.43_928.11		[M-H]-		928.109	ESI neg	1.434	32624		17045		5864		2067		5918		433875		397640		490183		10443		413908		326759		449421		0	0	123760	22322
1.43_951.58		[M-H]-		951.577	ESI neg	1.432	804340		1430376		1798049		1282774		2284523		123586		33118		16486		1561055		117942		2329852		307232		0	0	877	2375
1.44_343.10		[M-H]-		343.103	ESI neg	1.436	23291		2832		6698		6904		2482		400733		428256		412297		7647		667367		14574		734672		0	0	234792	111508
1.44_349.07		[M-H]-		349.07	ESI neg	1.436	7692		955		0		820		0		536193		434274		504326		756		552963		754		533196		0	0	349608	207328
1.44_359.10		[M-H]-		359.098	ESI neg	1.435	403755		283062		435954		486614		484325		2929964		2696994		3131187		722760		3287920		3026936		3349630		0	0	1465408	731721
1.44_467.04		[M-H]-		467.036	ESI neg	1.442	1363339		210122		196342		150068		230568		1354926		1259700		1534583		240294		1326502		262205		1373318		0	0	728495	336047
1.44_536.07		[M-H]-		536.07	ESI neg	1.444	2131586		1309988		63858		121256		52855		1854302		2236494		1670555		7792		1977770		1925304		2323007		0	0	1056983	517454
1.44_548.08		[M-H]-		548.081	ESI neg	1.437	1798		0		0		0		0		353094		331197		399324		869		476488		1709		517271		0	0	100265	28295
1.45_169.01		[M-H]-		169.014	ESI neg	1.446	281467		104590		214511		151344		192640		312592		237878		330094		171067		261355		222476		294948		168609	105016	210418	268430
1.45_792.07		[M-H]-		792.073	ESI neg	1.452	200056		184739		241964		154658		204059		99314		243910		135718		161405		135533		223705		205899		0	0	24957	3634
1.45_878.06		[M-H]-		878.062	ESI neg	1.453	262619		242338		75150		367824		359498		310484		240914		266022		217505		259872		265644		207262		0	0	39452	5143
1.46_1175.11		[M-H]-		1175.11	ESI neg	1.456	463956		477413		354887		349919		453816		397283		440341		20389		600892		521436		458236		41697		0	0	0	0
1.46_307.01		[M-H]-		307.01	ESI neg	1.458	19395		65457		67466		9075		103675		354275		401920		493105		72369		609279		113786		738377		0	0	83049	8570
1.46_321.03		[M-H]-		321.025	ESI neg	1.459	240279		1604		41935		0		196207		249479		160215		314025		139228		160507		132681		255177		0	0	233507	73731
1.46_391.03		[M-H]-		391.031	ESI neg	1.459	17476846		18699608		16160409		16817926		19332012		17715782		7119768		8269286		19139076		19512422		20030484		9986129		147668	175582	20115130	2872415
1.46_400.04		[M-H]-		400.036	ESI neg	1.458	750114		198667		96041		166928		163744		757696		809503		817438		147995		977001		217795		1040498		0	1733	500327	235178
1.46_460.03		[M-H]-		460.029	ESI neg	1.464	97426		35638		11295		26242		16575		72787		101533		110031		9041		120986		12347		161794		0	0	189762	80651
1.46_462.04		[M-H]-		462.044	ESI neg	1.463	456430		118008		141105		132152		99863		480180		495573		564641		115253		681529		120346		729373		0	0	249154	96927
1.46_469.00		[M-H]-		469.005	ESI neg	1.461	1073256		326775		295867		225604		384873		1387202		1532717		1627670		304848		1642234		390561		1859232		0	7434	633210	253648
1.46_532.05		[M-H]-		532.05	ESI neg	1.462	585451		44150		32447		218453		41606		420386		305181		451699		6503		511076		561170		416045		0	0	229147	98125
1.46_551.04		[M-H]-		551.039	ESI neg	1.46	256490		126188		139491		188352		173345		2133450		1694836		2234660		217558		2633277		2987242		2777398		0	0	1434201	627590
1.46_556.06		[M-H]-		556.06	ESI neg	1.46	1474148		184630		214080		208940		161798		1261253		1401417		1377199		104387		1282870		143117		1445482		0	0	823361	444895
1.46_783.07		[M-H]-		783.069	ESI neg	1.457	36059600		35042592		30752462		31510910		40406784		36085460		37464248		13748102		34519724		14483863		37079276		16553780		94844	141157	4927315	2755204
1.47_317.04		[M-H]-		317.036	ESI neg	1.47	309267		266351		208612		204565		230626		224403		236987		96571		200440		243903		236634		98787		0	0	227810	44181
1.47_483.08		[M-H]-		483.078	ESI neg	1.473	932686		170389		170382		366976		227771		813161		665160		913140		303068		1007498		309645		1077319		0	0	733354	380221
1.47_484.04		[M-H]-		484.039	ESI neg	1.468	3382226		675688		663848		470659		584513		3600266		3800121		3879077		624780		4701107		688872		4732488		0	2911	1725179	749045
1.47_525.00		[M-H]-		524.996	ESI neg	1.474	663656		230458		110981		1095632		500663		528099		534306		429952		128292		364823		35374		305358		16355	16044	743521	71298
1.47_541.05		[M-H]-		541.055	ESI neg	1.474	130434		44400		105797		154459		73125		396670		359671		442737		27918		394755		94507		405982		0	0	314032	173564
1.47_801.08		[M-H]-		801.079	ESI neg	1.472	140572		70933		73938		25280		81880		546216		530823		639499		86459		750316		110975		829532		0	0	239021	99898
1.47_867.07		[M-H]-		867.072	ESI neg	1.465	14406289		15553176		15127655		14135025		16892266		15510529		15870692		2080854		16284042		16617299		16274380		2940950		0	0	632335	38147
1.47_943.08		[M-H]-		943.077	ESI neg	1.469	41742		6197		5345		41889		146607		235433		207312		258449		64055		322201		16976		375619		0	0	66909	14160
1.48_137.02		[M-H]-		137.024	ESI neg	1.478	138460		134667		147436		92738		152956		495834		522462		514680		563204		631666		135580		682529		141692	121180	447307	341703
1.48_474.54		[M-H]-		474.544	ESI neg	1.48	275298		170171		60584		139829		215672		230248		164868		179561		145496		269209		326988		207826		0	0	226022	49971
1.48_486.02		[M-H]-		486.024	ESI neg	1.481	991397		1169125		904635		1521605		1174011		1073032		813173		878520		117548		722353		781453		755175		11088	45144	1043532	295114
1.48_786.08		[M-H]-		786.077	ESI neg	1.476	627297		657665		542845		603750		764934		675056		689465		305922		623942		682104		680576		640371		0	0	639731	67371
1.49_329.09		[M-H]-		329.088	ESI neg	1.489	341584		413907		546520		441886		268433		325525		30398		82979		544708		523046		475080		281311		0	0	126871	108216
1.49_359.10		[M-H]-		359.099	ESI neg	1.488	403755		7544		54589		5307		26808		244391		342138		3131187		17668		854612		39493		3349630		0	0	464042	290494
1.49_474.84		[M-H]-		474.845	ESI neg	1.489	278757		228556		262501		213223		219574		321177		165963		143818		269682		150828		257964		149292		0	0	130174	15484
1.49_631.06		[M-H]-		631.057	ESI neg	1.489	393861		28121		45277		76750		63211		350196		319689		312571		13676		331447		33878		318463		0	0	336910	143263
1.49_962.06		[M-H]-		962.065	ESI neg	1.489	542821		509564		499749		640311		548490		185378		133748		172783		386693		160662		340355		157472		0	0	165153	22519
1.50_316.03		[M-H]-		316.033	ESI neg	1.498	3554140		871963		2979810		2494391		836641		3029880		3144358		2920459		2569228		2970710		831967		2891546		3643	10690	3162062	2070243
1.50_316.53		[M-H]-		316.535	ESI neg	1.503	1013342		256762		235149		287700		245120		908705		939569		852705		193375		871164		243277		844933		0	1457	980284	629809
1.50_439.99		[M-H]-		439.985	ESI neg	1.496	4342		139840		55977		138432		52455		159844		56939		138878		95518		1731		23093		148905		11240	9996	316735	362928
1.50_453.04		[M-H]-		453.039	ESI neg	1.501	10390536		11400341		10663059		10360652		10134688		10873904		5029268		4407482		9429677		11443553		10797757		4745440		26573	69215	8211948	1001605
1.50_475.22		[M-H]-		475.223	ESI neg	1.499	282247		265154		246528		310498		313850		184092		155820		195040		227901		190956		309584		164815		0	0	208856	162970
1.51_1175.11		[M-H]-		1175.11	ESI neg	1.509	463956		0		3715		0		0		397283		440341		373765		0		521436		6259		484770		0	0	490612	157503
1.51_391.03		[M-H]-		391.031	ESI neg	1.51	3451055		3920049		3891125		16817926		3984064		17715782		17224178		17038282		3178096		19512422		4085799		19466544		147668	175582	20115130	15788986
1.51_523.99		[M-H]-		523.987	ESI neg	1.508	747702		1006040		604067		923631		440502		8453		116749		96814		878564		5593		366708		44866		10030	6215	162987	74499
1.51_671.10		[M-H]-		671.097	ESI neg	1.514	298261		187528		269715		162103		209703		154237		239334		145549		162967		91366		150556		180882		0	0	204523	151272
1.51_792.07		[M-H]-		792.074	ESI neg	1.513	200056		51115		241964		154658		106937		173408		243910		156223		91841		161141		117475		205899		0	0	126218	50950
1.51_878.06		[M-H]-		878.063	ESI neg	1.507	142310		116740		72811		160384		149858		122700		240914		266022		90901		42186		74320		207262		0	0	350578	529587
1.52_398.02		[M-H]-		398.02	ESI neg	1.524	169882		155392		124549		133479		163370		0		0		1446		165017		4172		170423		0		0	1550	2059	18822
1.52_867.07		[M-H]-		867.072	ESI neg	1.518	14406289		3588446		3271009		2375842		3377932		15510529		15870692		16064766		16284042		16617299		16274380		15268909		0	0	12333948	6861140
1.53_469.00		[M-H]-		469.005	ESI neg	1.527	408421		366552		448564		227317		506690		437830		282643		348945		332123		231014		457975		308094		0	4353	318265	379597
1.53_476.54		[M-H]-		476.538	ESI neg	1.535	2334414		2583128		2587132		2297393		2444799		2635540		2322274		2466568		2217371		2637590		2406141		2431379		0	3132	2012690	1459789
1.54_403.12		[M-H]-		403.125	ESI neg	1.544	156415		139320		269699		242410		207818		187971		195110		32677		279671		475753		503997		18292		0	0	25833	4610
1.54_576.13		[M-H]-		576.128	ESI neg	1.544	769964		701101		822856		465033		778740		782603		794095		6886		810601		820422		733637		1408		0	0	444226	4718
1.55_329.09		[M-H]-		329.088	ESI neg	1.546	341584		90745		78225		74280		70073		325525		289192		415358		108345		523046		97524		1033291		0	0	406926	272765
1.55_453.04		[M-H]-		453.039	ESI neg	1.555	9413860		10092549		11140648		6897792		10072918		10873904		9842827		10037866		10267139		11443553		12982390		10064848		24330	47218	8211948	5124444
1.55_462.04		[M-H]-		462.044	ESI neg	1.546	283215		281407		288473		157010		252268		232495		275020		275737		266973		343795		303400		63826		0	0	134662	60953
1.55_474.84		[M-H]-		474.844	ESI neg	1.55	267042		296557		261427		61206		180295		321177		135489		142236		269682		295893		289811		280449		0	0	195475	169376
1.55_475.03		[M-H]-		475.034	ESI neg	1.549	59903364		64931108		12334138		60483640		62759152		66108012		59677960		60504476		56913660		67291272		64192128		61115592		226711	294750	50702864	36968592
1.55_475.22		[M-H]-		475.223	ESI neg	1.549	261686		251682		42247		310498		310449		238093		324574		341504		232197		320260		73212		242583		0	0	178701	174005
1.55_486.02		[M-H]-		486.024	ESI neg	1.555	1483464		1169125		904635		428526		1174011		1212368		911163		1070679		832208		867471		781453		717721		0	22237	1656026	1989469
1.55_519.98		[M-H]-		519.982	ESI neg	1.554	216910		301016		120104		332823		113446		105263		98016		78507		205167		78941		66599		31397		4381	6777	347480	272529
1.55_962.07		[M-H]-		962.066	ESI neg	1.553	542821		509564		499749		11599		16891		583517		405062		470524		386693		457523		340355		409202		0	0	607777	580515
1.55_977.03		[M-H]-		977.028	ESI neg	1.549	276340		467599		265363		443028		174371		230992		217635		169740		394789		212828		184863		115490		0	0	322858	117705
1.56_391.03		[M-H]-		391.031	ESI neg	1.562	3451055		2140311		1915617		1931718		2070537		3864469		3917840		17038282		3178096		3648830		2208960		19466544		106496	106013	4212346	15788986
1.56_451.22		[M-H]-		451.219	ESI neg	1.559	144789		129417		167523		88946		143152		173142		173121		215119		186036		184274		218954		1526		0	0	87741	12747
1.56_483.08		[M-H]-		483.078	ESI neg	1.561	1004099		797858		1104403		652457		1475375		1179471		267898		314628		1443127		1871492		1864163		191097		0	1891	687912	166296
1.56_519.06		[M-H]-		519.055	ESI neg	1.559	144714		102297		171805		92729		227303		193818		184106		197756		167822		242278		242602		0		0	0	122074	53969
1.56_523.99		[M-H]-		523.988	ESI neg	1.558	747702		1006040		604067		923631		440502		429404		433772		379176		878564		360070		366708		234798		11170	2169	870844	480207
1.56_589.07		[M-H]-		589.073	ESI neg	1.56	2809898		2169969		2958390		1413346		2283762		2616724		427533		2298543		1938258		2688074		2700685		93425		0	0	26804	0
1.56_631.06		[M-H]-		631.058	ESI neg	1.561	842170		1166013		1179993		810209		1378807		1121183		1214534		1342401		1541587		2098632		1927615		103460		0	0	605398	143263
1.56_640.13		[M-H]-		640.131	ESI neg	1.563	976784		609214		1014002		688363		933281		1038111		18840		5140		654555		722619		683788		0		0	0	0	0
1.56_764.11		[M-H]-		764.106	ESI neg	1.563	981798		847389		1393075		557257		1132359		1230590		1310114		1214840		1072616		1469029		1412056		63085		3277	0	9657	49190
1.56_773.08		[M-H]-		773.084	ESI neg	1.558	459271		335566		387623		259626		495226		457030		391285		609608		335712		503208		447796		6495		0	0	3247	0
1.56_845.08		[M-H]-		845.077	ESI neg	1.56	351489		324627		385116		186632		415723		388014		12983		433795		392965		19082		511829		9412		0	0	0	42464
1.56_907.09		[M-H]-		907.085	ESI neg	1.562	4313187		4110762		5519508		2344310		4839625		4610256		277179		295433		4337924		6796280		6306850		267750		0	0	118085	129058
1.57_398.02		[M-H]-		398.021	ESI neg	1.575	169882		155392		124549		133479		163370		138884		209577		186972		165017		139173		170423		217364		0	0	242416	90339
1.57_446.03		[M-H]-		446.031	ESI neg	1.573	111104		165217		114330		146521		135552		125380		116281		187610		149792		169266		148945		175486		0	1951	117358	49121
1.57_461.04		[M-H]-		461.036	ESI neg	1.575	70872		102819		76093		66573		117262		65053		93022		99001		84534		103984		126003		113749		0	0	101974	49929
1.57_532.05		[M-H]-		532.05	ESI neg	1.568	908181		728518		954568		859824		1255301		883496		871249		989878		709074		859742		726838		23277		0	0	577518	2813
1.57_611.07		[M-H]-		611.068	ESI neg	1.574	16053780		14819834		18801412		9287882		15182944		15827818		853904		14847537		12359577		17311542		18484270		411574		3849	15970	10023	21652
1.58_525.04		[M-H]-		525.041	ESI neg	1.583	91111		161564		97209		78744		136498		130105		127167		118871		176016		198394		158740		202131		0	0	104300	53850
1.59_341.09		[M-H]-		341.088	ESI neg	1.586	267336		383546		330210		398962		659826		421608		604427		92093		318106		185262		760873		258517		0	0	64825	32925
1.59_403.12		[M-H]-		403.124	ESI neg	1.594	156415		139320		0		2101		838		187971		195110		234892		779		475753		503997		578562		0	0	127396	61520
1.59_576.13		[M-H]-		576.128	ESI neg	1.592	769964		701101		43666		17212		35262		782603		794095		753892		17121		820422		733637		881522		0	0	444226	189988
1.59_632.57		[M-H]-		632.568	ESI neg	1.594	550358		689235		621112		484881		597903		581464		693118		612936		490310		671018		818660		609194		0	0	479975	9645
1.59_755.60		[M-H]-		755.601	ESI neg	1.587	210478		280797		351194		170401		318528		216129		179477		191614		244077		147413		380303		175401		0	0	87483	43900
1.60_1004.62		[M-H]-		1004.62	ESI neg	1.604	198580		205324		290448		86147		382965		270298		314610		255053		191526		286725		324409		320463		0	0	68843	6383
1.60_327.05		[M-H]-		327.045	ESI neg	1.605	1903810		1378184		2066462		1623907		1735631		0		0		0		1931716		0		1698216		0		0	0	0	3635
1.60_475.03		[M-H]-		475.033	ESI neg	1.602	9794528		12302542		12334138		8283475		10759728		16336570		18800552		60504476		11850130		19770524		11389790		61115592		226711	262396	13676676	36968592
1.60_671.10		[M-H]-		671.097	ESI neg	1.599	499939		386250		521269		340645		483523		203805		271103		228120		393923		243450		535625		222075		3188	0	163255	93818
1.60_707.06		[M-H]-		707.064	ESI neg	1.604	504186		611159		618086		425357		688823		553349		706978		628847		610681		792563		841263		737907		0	1706	599292	303458
1.60_786.09		[M-H]-		786.088	ESI neg	1.598	3990616		2755117		4096858		1885597		6618901		4789814		54778		88446		4130606		117833		4677400		26670		0	1522	56721	481004
1.60_795.13		[M-H]-		795.126	ESI neg	1.598	153529		206602		205151		90044		202497		212437		236912		208799		162604		254400		284346		287560		0	0	103332	0
1.61_322.03		[M-H]-		322.028	ESI neg	1.606	182636		31145		86432		17292		346781		53245		16739		73138		105095		13506		88735		40517		0	0	55133	6848
1.61_359.10		[M-H]-		359.098	ESI neg	1.613	594842		650128		1318440		1049357		902266		537477		6287		871290		1179696		1294464		1439522		54155		0	0	25576	35434
1.61_390.05		[M-H]-		390.052	ESI neg	1.61	223189		223812		195884		94052		213636		177934		162086		227125		143472		209027		200960		173214		0	0	6911	1812
1.61_443.03		[M-H]-		443.026	ESI neg	1.607	263356		190764		395610		97914		368460		380759		434464		428618		219252		526444		484713		499183		0	0	54298	0
1.61_453.04		[M-H]-		453.038	ESI neg	1.614	9413860		10092549		11140648		6897792		3277720		9656298		10527181		10217772		10267139		12659570		12982390		12813285		17888	51114	4749632	2872974
1.61_523.04		[M-H]-		523.044	ESI neg	1.615	411386		309995		489578		200154		59864		398645		410835		436313		256856		407442		439786		342516		0	0	153738	82745
1.61_589.07		[M-H]-		589.073	ESI neg	1.613	2809898		458940		672852		339675		450731		2616724		2915229		2298543		1938258		2688074		558110		2592912		0	0	1059638	508233
1.61_603.06		[M-H]-		603.063	ESI neg	1.615	116550		82147		94832		55422		150254		66596		40683		59260		69736		60571		88505		37675		0	1713	71761	6677
1.61_640.13		[M-H]-		640.131	ESI neg	1.614	976784		609214		1014002		688363		933281		1038111		986486		831008		654555		722619		683788		820472		0	0	512584	327978
1.61_660.02		[M-H]-		660.023	ESI neg	1.614	234266		285004		190228		208652		116124		130364		182246		111940		192055		109859		125007		65262		0	0	188250	72161
1.61_742.11		[M-H]-		742.111	ESI neg	1.614	865140		615547		1309460		343890		7581		965372		1156324		864550		807165		1113434		1039777		1226747		0	0	156265	18508
1.61_755.10		[M-H]-		755.101	ESI neg	1.609	481295		359399		466418		215369		342478		247136		239855		264467		283226		165195		468299		221420		0	0	132089	61294
1.61_764.11		[M-H]-		764.106	ESI neg	1.613	981798		172602		285985		129804		122061		1230590		1310114		1214840		169090		1469029		212252		1590801		0	0	330348	121968
1.61_845.08		[M-H]-		845.077	ESI neg	1.613	351489		324627		42563		11967		25179		388014		406906		433795		392965		502123		44211		497310		0	0	168322	94506
1.61_868.08		[M-H]-		868.08	ESI neg	1.61	606387		628088		853773		330915		971695		718441		779016		960895		940316		1299650		1190723		589936		0	0	258359	131329
1.61_907.09		[M-H]-		907.086	ESI neg	1.614	4313187		4110762		615513		325508		4839625		4610256		5277456		4795586		615968		6796280		6306850		6343092		0	0	1418066	620561
1.62_1065.11		[M-H]-		1065.11	ESI neg	1.617	421539		388972		605549		196472		403993		456911		542909		451773		357677		612670		581584		529171		0	0	91691	32167
1.62_391.03		[M-H]-		391.031	ESI neg	1.619	1261908		1329099		1322133		1057469		1307020		1620860		1856772		2095096		1425978		1707028		1295692		2276439		105909	105485	2648617	3065114
1.62_451.22		[M-H]-		451.219	ESI neg	1.616	170116		208414		288515		175935		163161		173142		173121		215119		331312		184274		192271		146228		0	0	87741	46640
1.62_462.03		[M-H]-		462.026	ESI neg	1.625	217567		332819		234033		158396		263707		203057		313752		304031		290704		371083		387465		414761		0	1822	187510	24892
1.62_475.54		[M-H]-		475.536	ESI neg	1.623	4248568		4954010		5630808		3126396		4608322		4959363		5810406		5810470		5357402		6517358		5113918		8087464		83454	89659	4221362	3765699
1.62_482.04		[M-H]-		482.041	ESI neg	1.622	185046		232745		193457		108412		184977		160656		194554		264792		170317		223335		310612		220385		0	0	134136	53878
1.62_486.02		[M-H]-		486.025	ESI neg	1.623	330519		362354		273308		428526		50089		324203		274566		315506		176439		299702		333444		717721		3554	11889	514380	672786
1.62_505.19		[M-H]-		505.193	ESI neg	1.621	188150		180012		224156		124412		288611		236057		237855		292793		183547		188893		192788		230427		0	0	104991	0
1.62_519.06		[M-H]-		519.056	ESI neg	1.622	183199		158345		157997		155996		252177		193818		184106		197756		163255		242278		231433		229830		0	0	122074	74729
1.62_525.00		[M-H]-		524.996	ESI neg	1.623	162696		74242		24318		79284		121604		113026		493406		84877		148752		115734		151427		305123		3167	3835	256443	205978
1.62_542.07		[M-H]-		542.068	ESI neg	1.619	215764		190871		192974		141957		219131		211555		236432		230953		161083		168381		43221		166640		0	0	166232	83085
1.62_546.08		[M-H]-		546.078	ESI neg	1.621	690291		431316		365359		381190		806753		70835		69089		713199		313342		107254		427876		69684		0	0	73252	43730
1.62_620.07		[M-H]-		620.073	ESI neg	1.622	1773342		1643675		2463504		1201162		1780590		601236		585491		492530		2551586		711087		2454699		157987		0	1707	145289	19051
1.62_622.06		[M-H]-		622.059	ESI neg	1.622	420858		377672		392828		339812		351350		370874		397407		305680		9758		296965		309949		246607		0	0	334627	239016
1.62_631.06		[M-H]-		631.058	ESI neg	1.618	604676		869862		865231		597518		935140		1121183		1214534		1342401		1282298		2098632		1436760		2233640		0	0	605398	270429
1.62_900.14		[M-H]-		900.14	ESI neg	1.62	1117631		613551		1405275		342508		44943		1141479		1454632		987836		17811		1109638		1077760		1140889		0	0	225171	48344
1.62_921.06		[M-H]-		921.065	ESI neg	1.621	66764		140406		79742		46863		88121		95688		107532		120792		71768		160922		181973		146241		0	0	80378	15363
1.62_951.08		[M-H]-		951.075	ESI neg	1.623	2410728		2775614		3064782		1798033		2525783		3569108		4712024		4694010		3493301		4856447		3958330		7242850		9205	28432	2167642	1653081
1.63_316.03		[M-H]-		316.033	ESI neg	1.627	326573		272987		237192		148807		258610		397789		462609		502574		219251		416621		195033		774779		16603	47948	859020	762621
1.63_337.09		[M-H]-		337.093	ESI neg	1.632	1933234		1778776		2269438		1520039		2874473		2189472		2548542		2166260		1796120		2016845		2106062		65327		0	0	66703	10871
1.63_343.10		[M-H]-		343.103	ESI neg	1.634	152088		112130		162791		105851		138170		177054		206898		188558		153236		221552		158948		259728		0	0	103392	49255
1.63_357.06		[M-H]-		357.059	ESI neg	1.631	1080934		731353		899263		964582		853792		986989		724936		520973		725394		702052		654349		0		0	0	0	1760
1.63_433.13		[M-H]-		433.135	ESI neg	1.634	189338		141781		225176		2618		2594		227348		239756		279204		137004		179048		279374		268653		0	0	106605	62056
1.63_465.03		[M-H]-		465.031	ESI neg	1.629	568584		768178		869393		336926		1033999		728831		925885		1140211		584175		1121353		1166789		1147408		0	0	218109	66074
1.63_611.07		[M-H]-		611.068	ESI neg	1.629	3346093		2952887		3622927		1987214		3078957		15827818		19899754		14847537		2862590		17311542		3644518		16291047		3849	15970	8324020	3893209
1.63_632.57		[M-H]-		632.568	ESI neg	1.627	550358		689235		621112		484881		597903		581464		693118		612936		67524		671018		78582		609194		0	0	479975	226589
1.63_639.12		[M-H]-		639.12	ESI neg	1.631	153123		123455		196079		137434		253528		224970		236095		215585		151526		211786		185153		217107		0	0	67539	0
1.63_783.07		[M-H]-		783.07	ESI neg	1.626	1367419		2071869		887638		797604		1259953		2130576		2634782		2552625		901508		2374966		1065766		3133598		32113	71827	2560383	2920093
1.63_787.09		[M-H]-		787.091	ESI neg	1.634	1195784		816872		1243519		564938		1975283		1403967		1348089		1748134		1169351		1699202		1311172		1751506		0	0	590580	1949
1.63_858.07		[M-H]-		858.067	ESI neg	1.634	158183		140078		169455		57892		202156		206691		228378		243311		269597		319310		307829		278037		0	0	7489	4029
1.64_289.07		[M-H]-		289.072	ESI neg	1.635	76894592		56458536		92830320		55597540		70992536		93919432		78042432		6106		84422360		88242784		81998160		3946		10699	50137	3426	3485
1.64_289.16		[M-H]-		289.163	ESI neg	1.635	527212		381062		635113		337152		483807		656237		552014		487518		597149		632939		571264		0		0	0	0	0
1.64_318.11		[M-H]-		318.11	ESI neg	1.642	1754990		570897		1551454		935669		1977789		2446049		2258840		1974668		2489214		2378948		3809468		4545		0	0	2334	0
1.64_397.06		[M-H]-		397.059	ESI neg	1.638	212322		293922		265511		119708		1426		236958		236389		224620		247434		277540		309802		279945		0	0	186822	75781
1.64_466.03		[M-H]-		466.028	ESI neg	1.639	1169849		1469605		1401360		1288162		1689767		1268742		1447510		1352180		1151195		1504617		1359988		1331009		7356	5497	1358226	560386
1.64_536.07		[M-H]-		536.07	ESI neg	1.637	470027		345575		512636		370018		461635		437718		414577		366394		557577		480704		422197		3341		3993	0	211042	5114
1.64_608.19		[M-H]-		608.189	ESI neg	1.638	350784		49731		367432		110704		331311		539633		425546		333814		554030		523553		738339		0		0	0	50984	0
1.64_612.57		[M-H]-		612.574	ESI neg	1.641	299114		243875		290427		206184		321139		1134726		1535246		1117057		306478		1400076		265722		1195904		0	0	639169	320465
1.64_865.20		[M-H]-		865.2	ESI neg	1.635	432154		281405		548164		167267		318878		364250		382250		4686		294782		355192		275376		0		0	0	0	0
1.65_147.05		[M-H]-		147.045	ESI neg	1.653	184885		181060		224852		181782		214395		184535		228176		223083		268742		306198		371091		264517		0	0	2062	0
1.65_216.09		[M-H]-		216.088	ESI neg	1.646	384133		0		824		0		0		131295		171702		150778		921		98729		0		232103		0	0	85660	33723
1.65_341.09		[M-H]-		341.088	ESI neg	1.649	1932720		1851894		2662440		1634094		2306716		421608		604427		492129		1992587		308102		2488472		536696		0	0	334675	120865
1.65_467.04		[M-H]-		467.035	ESI neg	1.647	1358122		1025878		1273855		831112		1440743		1455209		1407757		1627322		1254794		1374457		883306		1303246		16803	10440	885756	368374
1.65_532.84		[M-H]-		532.838	ESI neg	1.654	156611		172271		67334		140170		257054		254080		5344		184538		158996		200182		95104		242478		0	0	134577	65773
1.65_551.04		[M-H]-		551.039	ESI neg	1.649	2123619		1546202		1849447		1381348		2511420		2452700		2069424		2380356		1927242		2159702		2071144		1378632		0	4041	1207824	313305
1.65_551.54		[M-H]-		551.541	ESI neg	1.653	1132506		787735		884787		731284		1331818		1261222		1056979		1268202		1057286		1192139		1038136		1138868		0	0	631227	367789
1.65_671.10		[M-H]-		671.097	ESI neg	1.649	499939		386250		521269		340645		483523		524410		642752		482776		393923		536389		535625		508928		3188	0	243840	96379
1.65_697.12		[M-H]-		697.116	ESI neg	1.654	379666		326301		561323		352791		523323		413856		462203		491826		517369		652276		766875		644508		0	0	160896	53438
1.65_843.10		[M-H]-		843.097	ESI neg	1.65	282536		270300		316014		258480		350830		401992		420444		380144		338529		503621		312639		416261		0	0	185574	124213
1.65_885.07		[M-H]-		885.065	ESI neg	1.648	0		3963		4265		0		0		4259		0		0		0		0		0		0		3268	0	36816	1911
1.65_933.07		[M-H]-		933.066	ESI neg	1.65	163253		180812		55379		43180		75120		179552		211872		187526		164783		249242		88126		243911		0	0	133183	45690
1.65_935.08		[M-H]-		935.079	ESI neg	1.654	180924		153853		248579		71941		256308		266675		232400		278033		191987		230281		183094		227293		0	3140	103642	48142
1.66_1009.10		[M-H]-		1009.1	ESI neg	1.66	504656		564042		681184		412855		582743		633979		612046		651177		684672		909292		758322		853360		0	0	4119	102747
1.66_1070.13		[M-H]-		1070.13	ESI neg	1.661	312681		283926		345572		229707		397379		387666		337424		413980		276274		383868		342588		328804		0	0	157422	74535
1.66_165.06		[M-H]-		165.056	ESI neg	1.657	499671		941576		743489		441644		648418		568296		4167		575257		978711		1137133		1006891		0		2893	4167	3777	1780
1.66_193.05		[M-H]-		193.05	ESI neg	1.658	215883		197579		238799		152130		248249		154427		264678		185493		268980		102611		257485		157896		0	0	113227	77078
1.66_321.03		[M-H]-		321.025	ESI neg	1.662	1169901		342419		696577		276804		2252547		1374250		844425		1730270		855684		953648		713180		1295092		0	0	1122632	449209
1.66_359.10		[M-H]-		359.098	ESI neg	1.664	6484		650128		1318440		1049357		902266		537477		711836		871290		1179696		1294464		30478		1569497		0	0	512866	223203
1.66_446.03		[M-H]-		446.031	ESI neg	1.655	140997		136748		48472		146521		204578		160044		187820		199176		207737		234315		229904		206375		0	0	173570	51098
1.66_533.06		[M-H]-		533.057	ESI neg	1.657	58905964		51447944		58656532		46062488		66451736		62167156		60597076		59527948		48401188		58348460		53197336		109765		57840	80579	41350924	26320886
1.66_544.05		[M-H]-		544.048	ESI neg	1.656	785874		636991		515172		891121		716641		655707		515279		427260		441160		468383		405103		325369		0	0	12346	1005415
1.66_564.56		[M-H]-		564.555	ESI neg	1.658	363181		368451		338367		371683		432255		384981		291354		285434		261836		289725		256284		263573		0	0	505838	461808
1.66_582.01		[M-H]-		582.012	ESI neg	1.661	573764		819174		430333		975720		349544		276152		343491		239177		574570		200456		266602		128214		0	0	829171	1635
1.66_679.60		[M-H]-		679.602	ESI neg	1.657	629716		396059		782803		386940		676056		835244		808038		839059		708396		831093		723898		932775		0	0	166490	40872
1.66_849.09		[M-H]-		849.091	ESI neg	1.658	221894		207051		255848		221865		177687		258278		228254		231373		252709		246887		230120		234889		0	0	115619	54380
1.66_868.08		[M-H]-		868.08	ESI neg	1.661	606387		58100		32326		26040		56237		718441		779016		960895		77093		1299650		96524		1237978		0	0	258359	79203
1.67_418.10		[M-H]-		418.099	ESI neg	1.665	204528		153279		164193		127221		200767		182325		162117		151254		196457		194767		155790		0		0	0	193540	0
1.67_451.22		[M-H]-		451.219	ESI neg	1.671	170116		208414		6409		175935		163161		231209		240233		406915		29984		200534		28887		126690		0	0	109642	60955
1.67_543.04		[M-H]-		543.041	ESI neg	1.671	252077		287194		357038		139662		387122		11798		288468		267138		256970		349916		250584		315546		0	0	2807	5930
1.67_546.08		[M-H]-		546.078	ESI neg	1.671	34151		13886		365359		381190		27179		586506		601072		713199		313342		431947		427876		420675		0	0	378212	229500
1.67_756.61		[M-H]-		756.608	ESI neg	1.666	294327		158193		341073		142389		217385		292570		329505		232835		300894		366359		347947		362018		3207	0	49293	4997
1.68_193.01		[M-H]-		193.014	ESI neg	1.679	132034		124403		154553		59382		172633		115482		122327		175993		119705		196843		163151		0		0	0	0	0
1.68_357.06		[M-H]-		357.059	ESI neg	1.681	1080934		4734		100142		104646		42451		986989		724936		520973		725394		702052		6777		599131		0	0	699345	419751
1.68_400.04		[M-H]-		400.036	ESI neg	1.679	401293		434112		424638		268207		443864		400261		480319		370067		344899		500254		396212		374348		0	0	196963	135941
1.68_519.06		[M-H]-		519.056	ESI neg	1.68	183199		158345		16913		7125		11212		224414		194403		155248		163255		261457		17337		289069		0	0	151641	92262
1.68_579.15		[M-H]-		579.151	ESI neg	1.682	4827568		2523260		7085876		2490461		3777508		7058277		5041304		3910970		5985182		6410650		8287		6499335		0	0	795611	101156
1.68_620.07		[M-H]-		620.073	ESI neg	1.682	1773342		1643675		2463504		1201162		177262		2364806		2042642		1470654		2551586		2807410		2454699		2769475		0	0	684428	318678
1.68_631.06		[M-H]-		631.058	ESI neg	1.683	604676		869862		865231		597518		253409		876996		874863		910462		1282298		1696006		264390		1879662		0	0	488556	266862
1.68_679.07		[M-H]-		679.073	ESI neg	1.679	375168		197306		264929		134119		381588		253825		242434		223004		76149		11951		106635		85612		0	0	249029	139598
1.68_993.09		[M-H]-		993.087	ESI neg	1.675	81814		55908		56052		23721		75820		54033		65924		43151		7201		40748		23555		6078		0	0	73370	12645
1.69_1137.13		[M-H]-		1137.13	ESI neg	1.691	375073		379504		490212		297632		500656		540590		552828		579523		241176		406599		405745		396033		0	0	150408	83501
1.69_272.08		[M-H]-		272.078	ESI neg	1.693	296777		399778		841655		172193		1161477		689461		449699		520295		1067496		2252506		1993385		0		0	0	0	0
1.69_289.07		[M-H]-		289.072	ESI neg	1.685	76894592		56458536		92830320		9376445		7542048		93919432		78042432		69465656		84422360		88242784		81998160		90912200		10699	8747	32060032	14638851
1.69_289.16		[M-H]-		289.164	ESI neg	1.685	540134		381062		635113		359541		15444		440117		483925		487518		597149		531210		571264		653566		0	0	213842	93056
1.69_318.11		[M-H]-		318.109	ESI neg	1.693	1754990		570897		1551454		162080		35932		2446049		2258840		1974668		478577		2378948		3809468		2104233		0	0	1072632	551514
1.69_453.07		[M-H]-		453.067	ESI neg	1.685	2396870		2230449		2596935		1674657		2826983		2294625		2734705		2810104		2019060		3567839		2925488		3647182		0	0	1286320	557677
1.69_577.14		[M-H]-		577.135	ESI neg	1.687	317084		217848		407141		237173		244506		723650		883527		606334		265124		676915		317699		1070091		0	1772	529251	527065
1.69_603.07		[M-H]-		603.071	ESI neg	1.692	29195042		25764152		29916820		23819718		30399730		26650568		111132		25095700		20421064		23515454		23924912		86072		24033	55697	71761	25296
1.69_611.07		[M-H]-		611.068	ESI neg	1.69	3346093		2952887		3622927		128347		3078957		3270554		3341900		2356700		2862590		4139964		3644518		3923194		0	5582	1696839	936566
1.69_678.10		[M-H]-		678.097	ESI neg	1.688	7114788		4606629		8014648		4141710		7113650		9509038		8527031		8906810		6917526		8499250		7204745		9616699		0	0	2270664	659266
1.69_689.09		[M-H]-		689.087	ESI neg	1.689	324586		180502		230927		298718		271421		332865		259603		232590		246403		219419		222713		210832		0	0	213693	95748
1.69_704.05		[M-H]-		704.049	ESI neg	1.691	330857		335443		245450		377923		200963		245416		210643		195218		455579		162854		174723		122234		0	0	222670	61819
1.69_801.08		[M-H]-		801.08	ESI neg	1.687	447077		430906		544053		170063		593916		577234		606750		553975		405092		685957		562672		691448		0	0	128881	53226
1.69_852.10		[M-H]-		852.103	ESI neg	1.692	181587		169061		297218		19444		283252		379694		352592		475756		368759		405610		100652		712103		0	0	77976	23318
1.70_1067.12		[M-H]-		1067.12	ESI neg	1.699	7409484		5886132		8337330		4993543		9180591		8535320		8581716		9322995		6451215		8602731		7612036		8368101		0	2476	3875322	1666975
1.70_303.06		[M-H]-		303.062	ESI neg	1.698	196737		183837		10261		139636		428850		364809		360906		320033		391749		583013		453478		657890		0	0	147918	35012
1.70_305.08		[M-H]-		305.078	ESI neg	1.704	5256748		1923375		5041160		3369119		5654642		7466328		259425		215022		6465778		7858498		11729102		180376		0	0	86821	25942
1.70_316.03		[M-H]-		316.033	ESI neg	1.702	18385466		14359517		16366995		10185670		19023664		17860886		16064120		17393530		15610025		15768099		14094501		14465190		73685	90725	12658988	7224534
1.70_328.11		[M-H]-		328.112	ESI neg	1.699	338056		331730		479576		3306		3801		374186		434386		388293		573168		596973		720656		687234		0	0	295396	139701
1.70_363.09		[M-H]-		363.085	ESI neg	1.696	125076		182185		227055		1634		236101		184659		161625		164890		252279		222465		332928		241270		0	0	142960	105539
1.70_390.10		[M-H]-		390.104	ESI neg	1.697	182626		156269		237241		249993		232429		179844		165518		184072		274498		224753		341758		282383		0	0	221727	186906
1.70_463.09		[M-H]-		463.088	ESI neg	1.701	1081727		620112		12776		522120		773608		874124		893933		1001188		1095637		1169618		30687		1261070		0	0	441504	200739
1.70_479.17		[M-H]-		479.169	ESI neg	1.701	1096884		848580		898632		1140341		1033603		985838		988457		1101568		1137501		802153		949005		1025351		0	0	946612	0
1.70_481.17		[M-H]-		481.166	ESI neg	1.701	294023		236824		291170		394994		310734		289013		280716		318102		312810		237719		265135		278800		0	0	288671	0
1.70_532.83		[M-H]-		532.832	ESI neg	1.7	220596		192040		238409		205381		268049		286484		283645		185429		115840		235036		195289		235006		0	0	134577	82623
1.70_533.06		[M-H]-		533.057	ESI neg	1.7	58905964		51447944		58656532		46062488		66451736		62167156		60597076		59527948		48401188		58348460		53197336		55292116		57840	80579	41350924	26320886
1.70_612.57		[M-H]-		612.574	ESI neg	1.696	299114		105924		290427		101921		1621		316483		294686		224798		10716		372137		136254		325927		0	0	154364	56411
1.70_614.06		[M-H]-		614.061	ESI neg	1.699	343547		263687		201143		481927		258975		240161		214680		202312		163457		175551		171207		127542		0	0	461785	603776
1.70_652.03		[M-H]-		652.025	ESI neg	1.698	268288		356401		225729		448175		131270		131724		143511		60679		243596		81019		90296		15023		0	0	378419	258696
1.70_669.05		[M-H]-		669.051	ESI neg	1.702	1258283		930876		1005144		748548		1241550		1173953		998943		1061991		931896		1059926		808994		1023627		0	0	965649	644543
1.70_671.05		[M-H]-		671.045	ESI neg	1.698	355666		283026		307881		216726		382780		332768		298121		322597		283635		319199		233850		308031		0	0	280773	1609
1.71_1068.12		[M-H]-		1068.12	ESI neg	1.71	4038195		3104370		4490064		191966		328286		4556306		4506565		5008168		3513651		4614600		325461		4553905		0	0	2057922	887223
1.71_165.06		[M-H]-		165.056	ESI neg	1.707	10070		6797		12972		17913		648418		568296		675878		575257		978711		1137133		22963		1464975		4183	0	486209	268270
1.71_193.05		[M-H]-		193.05	ESI neg	1.709	215883		197579		6503		152130		248249		213776		197480		251217		268980		328898		257485		323022		0	0	160335	90105
1.71_341.09		[M-H]-		341.088	ESI neg	1.713	1932720		1851894		2662440		1634094		2306716		2783094		2557506		2133938		1992587		2763846		2488472		2787534		0	0	1179791	570445
1.71_401.11		[M-H]-		401.109	ESI neg	1.709	2160737		2109900		2525015		6955		2602829		2182540		1871502		2548542		2830012		3311661		2592308		3227086		0	0	1675230	855037
1.71_551.04		[M-H]-		551.039	ESI neg	1.714	3839461		3085497		3894262		3201950		4362940		3833410		2069424		3811300		3892046		2189961		4556592		2223272		4980	7000	1223381	728784
1.71_707.06		[M-H]-		707.064	ESI neg	1.709	8284703		9351419		10975680		10607201		10219126		9446970		10056578		9163429		12182863		13866293		12864242		12189409		12440	35104	8551623	6024635
1.71_711.11		[M-H]-		711.113	ESI neg	1.708	535767		520963		650183		216475		668916		521706		517806		634703		628904		716948		554521		679336		0	0	264057	48260
1.72_343.10		[M-H]-		343.103	ESI neg	1.719	2598182		2112809		3206710		1805157		2655596		132652		180212		101493		2346236		205300		2940676		187124		0	0	76521	46623
1.72_357.12		[M-H]-		357.119	ESI neg	1.719	578562		217400		413343		457776		597957		416576		730240		334869		234418		314754		288412		291210		6614	0	274890	140560
1.72_385.11		[M-H]-		385.114	ESI neg	1.719	4200050		1436214		2453372		2500840		3254609		143947		195648		100345		698068		119953		1311501		95082		0	0	66846	24701
1.72_446.03		[M-H]-		446.031	ESI neg	1.724	141063		198656		125899		130759		130061		93392		64032		35743		160039		168018		137557		141791		0	0	173570	98252
1.72_452.03		[M-H]-		452.031	ESI neg	1.716	1801836		2039613		2410768		1424228		1975689		2018222		2213086		2273060		2612694		3313053		3435733		3198240		4183	2771	1834533	67011
1.72_529.04		[M-H]-		529.044	ESI neg	1.722	265991		195712		250215		187177		168276		13394		257617		173777		220645		55418		264485		38222		0	0	17481	79279
1.72_632.78		[M-H]-		632.783	ESI neg	1.716	208275		54820		278438		97445		225043		169828		182406		132654		89039		149590		195516		11846		0	0	50117	35642
1.72_679.57		[M-H]-		679.573	ESI neg	1.717	303989		144473		210301		104416		281816		233122		257358		158804		61349		123546		123912		81163		0	0	189357	106930
1.72_748.11		[M-H]-		748.11	ESI neg	1.717	388113		253970		414722		234034		267449		445213		434931		565846		269919		349973		415548		417660		0	0	143954	100894
1.73_1049.11		[M-H]-		1049.11	ESI neg	1.729	369826		356665		399070		321850		517748		448499		467345		556213		400390		478151		474584		442237		0	0	148297	61943
1.73_193.01		[M-H]-		193.014	ESI neg	1.729	132034		12326		154553		1624		11584		115482		122327		175993		8547		196843		163151		168700		0	0	132973	63069
1.73_291.01		[M-H]-		291.015	ESI neg	1.726	17810540		14886459		23084480		6841180		26415140		23722346		24226946		28119510		16351225		28948522		24775884		28910760		3215	17610	7262330	51737
1.73_375.09		[M-H]-		375.085	ESI neg	1.729	592557		182193		299808		372497		393398		256970		6015		270201		83065		85320		89652		123343		0	0	225595	3004
1.73_523.20		[M-H]-		523.198	ESI neg	1.731	358797		181295		282773		371721		369817		254377		427406		131004		63122		77247		93353		58234		0	0	48262	0
1.73_524.05		[M-H]-		524.052	ESI neg	1.73	3548416		3724390		4056136		3375444		4268013		3865412		3485959		4093354		3473850		3626596		3724241		3587961		0	0	2140127	1153139
1.73_696.07		[M-H]-		696.069	ESI neg	1.734	283522		210762		164455		81885		97746		250514		183740		250616		174967		238536		180496		231999		0	0	231617	231065
1.74_1079.11		[M-H]-		1079.11	ESI neg	1.739	296612		170306		462409		133982		178240		325630		399855		301729		146585		441568		165597		376096		0	0	129659	81901
1.74_316.03		[M-H]-		316.033	ESI neg	1.744	18385466		14359517		1354879		939863		19023664		17860886		16064120		17393530		1236586		15768099		1059564		14465190		22497	28201	12658988	7224534
1.74_484.09		[M-H]-		484.087	ESI neg	1.736	45332		65794		31149		38209		118335		178234		210907		186115		75654		258692		91252		1356899		195629	185915	536647	255242
1.74_525.06		[M-H]-		525.055	ESI neg	1.736	1928339		1747278		2042946		1411956		2203795		1928038		1874029		1870086		1317065		1709147		1609032		1552078		37121	33863	1224615	708181
1.74_603.07		[M-H]-		603.071	ESI neg	1.737	29195042		25764152		29916820		23819718		30399730		26650568		29740912		25095700		652267		23515454		23924912		20915842		20437	4649	19412006	14007615
1.74_614.06		[M-H]-		614.061	ESI neg	1.736	343547		263687		201143		481927		258975		240161		214680		202312		163457		175551		171207		127542		0	0	461785	603776
1.74_755.16		[M-H]-		755.157	ESI neg	1.735	485092		513610		763440		504475		585672		488140		483407		377712		636701		461611		518951		368944		0	0	217320	59178
1.74_825.17		[M-H]-		825.171	ESI neg	1.741	1260611		982668		1459036		944148		1452350		1227962		1402343		957035		1044682		890536		1095370		1026001		0	0	539908	205979
1.74_963.07		[M-H]-		963.074	ESI neg	1.735	321901		200663		332844		117063		265273		264309		296060		286552		140088		225031		248759		206643		0	0	123047	52506
1.75_272.08		[M-H]-		272.078	ESI neg	1.747	3296		13316		56042		0		11014		689461		449699		520295		1067496		2252506		143438		2115450		0	0	436188	188547
1.75_451.22		[M-H]-		451.219	ESI neg	1.754	446942		436812		625536		334219		499077		681110		10059		665874		756373		712203		780683		462980		0	0	341059	4173
1.75_481.03		[M-H]-		481.034	ESI neg	1.754	1344422		908664		1411820		800190		1263336		1212679		1267887		1174686		11474		864781		925392		779516		0	0	861454	442796
1.75_485.05		[M-H]-		485.046	ESI neg	1.754	1034234		1155046		1361790		1118878		1261360		1165892		55823		1130841		1551026		1590015		1517523		1327716		0	3154	820146	15622
1.75_697.13		[M-H]-		697.133	ESI neg	1.747	437483		461371		614768		13998		11891		452208		490948		609044		747352		761405		765403		831310		0	0	234800	85796
1.75_929.16		[M-H]-		929.163	ESI neg	1.746	222838		216185		222967		279574		292213		255546		258488		272864		362358		325057		431877		421251		0	0	138748	58491
1.76_289.07		[M-H]-		289.072	ESI neg	1.76	2258476		1369661		2617024		1582632		1576819		5178094		4487690		4219142		2036695		4243068		1789179		5489890		0	3685	3291772	3815165
1.76_529.04		[M-H]-		529.044	ESI neg	1.758	265991		162220		250215		128810		224523		258339		257617		173777		162999		264056		193524		256364		0	0	139716	79279
1.76_620.07		[M-H]-		620.073	ESI neg	1.76	1033803		1026394		1441760		966113		932451		1206137		1274107		1026681		1309783		1402030		1230541		1254197		0	0	618279	321400
1.76_755.60		[M-H]-		755.601	ESI neg	1.761	247977		162492		227702		159282		173801		200979		241144		189727		168111		231522		216599		812964		0	0	325574	200866
1.76_944.08		[M-H]-		944.08	ESI neg	1.757	162827		218728		184150		97522		212903		216879		180583		221686		235435		261572		212636		274492		0	0	83577	11810
1.77_251.02		[M-H]-		251.02	ESI neg	1.775	16766		33014		32956		0		45482		15098		8085		24623		25288		69516		4335		30610		0	0	51527	24385
1.77_402.10		[M-H]-		402.104	ESI neg	1.771	441153		117184		194488		341089		306725		219421		400170		201748		42211		22068		85498		36165		0	0	226501	175407
1.77_518.05		[M-H]-		518.052	ESI neg	1.773	19475		12715		22634		26699		15628		20653		15868		25771		30999		0		18852		24115		0	0	154907	74290
1.77_551.04		[M-H]-		551.039	ESI neg	1.77	2617784		1774408		2376335		1905389		2899954		3833410		3296653		3811300		2378777		4458515		2437920		4187153		0	7854	2483686	1368845
1.77_708.57		[M-H]-		708.573	ESI neg	1.771	195198		236482		246836		194351		277992		1006054		1073358		309173		366105		334156		239023		1321554		0	0	853332	652632
1.78_291.01		[M-H]-		291.015	ESI neg	1.784	12167975		7409532		11109369		6046750		14253532		23722346		24226946		28119510		5916776		28948522		8024552		28910760		9829	60637	7262330	2446946
1.78_397.13		[M-H]-		397.135	ESI neg	1.781	232295		224717		293069		163711		315491		289316		398127		213189		155048		223799		256499		230060		0	0	131315	66196
1.78_398.11		[M-H]-		398.109	ESI neg	1.783	284894		110815		199437		151673		259285		301553		384628		207640		87567		112133		124696		120593		0	0	109030	49109
1.78_446.03		[M-H]-		446.031	ESI neg	1.779	141063		165001		118804		122192		143648		93392		152935		126459		183472		168018		193411		168793		0	0	195890	95815
1.78_466.03		[M-H]-		466.028	ESI neg	1.783	2054308		2998629		2765194		2573636		2976065		2422542		2598974		2652735		3982216		4174760		4175330		3809560		7510	52590	2455582	246044
1.78_478.03		[M-H]-		478.027	ESI neg	1.785	461106		441356		420811		623669		446098		403986		330959		301699		314499		209074		250331		195724		0	0	793767	786638
1.78_484.04		[M-H]-		484.039	ESI neg	1.781	790357		980962		1111265		731148		952131		610865		602952		992852		1177079		1335701		1285451		896235		0	4632	519624	271874
1.78_562.04		[M-H]-		562.042	ESI neg	1.777	222853		200650		262944		297974		281076		250164		220905		214238		204113		284646		238800		228112		0	0	141235	56511
1.78_613.14		[M-H]-		613.141	ESI neg	1.78	304493		323804		415219		234991		286593		345038		334807		264562		309432		391330		242488		291190		0	0	198229	111911
1.78_755.10		[M-H]-		755.101	ESI neg	1.779	313897		228715		353660		197134		180294		259000		312466		209726		242299		242173		238695		220316		0	0	147049	59292
1.78_971.10		[M-H]-		971.1	ESI neg	1.78	210919		253721		318180		248888		290247		259027		313730		283166		350096		361474		384440		332980		0	0	141649	39534
1.79_441.01		[M-H]-		441.01	ESI neg	1.789	288367		223181		453860		143339		378790		367630		419875		397578		257567		404306		364515		386453		0	0	120533	27542
1.79_461.04		[M-H]-		461.035	ESI neg	1.789	60342		74222		52885		49693		55791		30016		41786		72087		82717		78808		74016		82409		0	0	98145	73355
1.79_467.04		[M-H]-		467.036	ESI neg	1.788	33131164		34463836		36515748		28317282		40272848		35703664		33049038		33693052		31343322		31405436		29099976		27865444		97379	197435	25663110	14401459
1.79_469.53		[M-H]-		469.535	ESI neg	1.794	77788		99716		88049		84972		65811		40218		95090		80957		112769		128598		98600		120916		0	0	104345	39849
1.79_515.99		[M-H]-		515.991	ESI neg	1.788	513235		741477		448084		763843		300062		250107		253486		225915		647389		221381		232071		103382		0	0	778357	381893
1.79_576.08		[M-H]-		576.084	ESI neg	1.793	0		0		0		0		0		0		0		0		0		0		0		0		0	0	262030	156197
1.79_620.07		[M-H]-		620.073	ESI neg	1.795	1033803		1026394		1441760		966113		932451		1206137		1274107		1026681		1309783		1402030		1230541		1254197		0	0	618279	321400
1.79_802.08		[M-H]-		802.084	ESI neg	1.794	1113225		577946		1026873		497958		1127980		1095477		1263286		1229231		563374		823886		793116		826952		0	0	392839	135899
1.79_953.08		[M-H]-		953.084	ESI neg	1.794	2951082		3483536		985505		3106375		3534824		1046733		1056702		3912067		3870308		1567408		4404656		1465642		0	8720	498035	206642
1.80_161.08		[M-H]-		161.082	ESI neg	1.796	126234		145345		169489		57627		164577		96204		130205		74968		170258		140593		111149		94330		5327	2710	92274	38717
1.80_278.07		[M-H]-		278.067	ESI neg	1.804	18291		10385		77776		13812		4889		35518		109616		67203		183151		221007		6491		365742		0	0	89832	27332
1.80_293.12		[M-H]-		293.124	ESI neg	1.798	142415		86061		134866		141382		148884		88013		140261		54751		207067		340432		664022		151308		0	0	122126	46552
1.80_447.02		[M-H]-		447.02	ESI neg	1.797	105160		100755		125266		53052		142366		116818		154425		133745		124774		184870		70075		156340		0	0	76165	30394
1.80_633.07		[M-H]-		633.074	ESI neg	1.802	7831382		6753408		8595806		5202268		7834920		8546025		8233937		8216900		6894572		8457681		7692729		7821052		8555	25769	4703815	3345486
1.81_344.99		[M-H]-		344.989	ESI neg	1.809	303894		285263		434687		162068		536136		439620		594602		571972		417880		771751		619103		802733		0	0	165258	24476
1.81_474.54		[M-H]-		474.543	ESI neg	1.812	372321		324355		305370		281032		355785		475052		229811		408207		281760		444441		470330		278131		0	0	25811	35042
1.81_475.03		[M-H]-		475.033	ESI neg	1.809	49508540		51936228		55823304		50165012		51830808		56127620		55307620		56175996		53752628		59941684		59812028		56890688		538295	810993	9086477	25459166
1.81_482.04		[M-H]-		482.041	ESI neg	1.807	214764		261615		290274		299453		281441		201598		203597		213920		220578		167748		160543		174825		0	0	211952	120296
1.81_485.05		[M-H]-		485.046	ESI neg	1.806	1034234		1155046		1361790		1118878		1261360		1165892		1315309		1130841		1551026		1590015		21383		1327716		0	3154	820146	331482
1.81_524.99		[M-H]-		524.995	ESI neg	1.813	222272		315122		165591		448062		70750		130548		139490		121063		169066		132476		151239		64392		38784	29049	456827	107233
1.81_612.08		[M-H]-		612.076	ESI neg	1.807	398420		426508		344957		382134		580713		391421		278109		338850		251267		266978		402995		236877		0	0	157863	98972
1.81_618.06		[M-H]-		618.058	ESI neg	1.811	36926		30627		44300		17582		7457		29262		74957		56724		27493		19366		34737		30611		0	0	121910	44475
1.81_783.57		[M-H]-		783.571	ESI neg	1.808	3134803		3728316		3817205		2572208		1927028		3558488		3776829		3575654		3871506		4577732		1940949		4319326		0	7730	2282259	1402334
1.81_801.08		[M-H]-		801.08	ESI neg	1.815	875956		737213		2798852		433886		1043320		2965072		3225353		3120411		542901		2175226		980514		2191118		0	0	1054775	461945
1.81_924.09		[M-H]-		924.088	ESI neg	1.814	145365		135814		147702		238392		206556		204634		161988		250432		167490		194906		182003		6064		0	0	158196	95382
1.81_951.08		[M-H]-		951.075	ESI neg	1.812	24540062		27575282		31257098		25053298		27814388		30906206		31216780		31809950		30522714		37662176		35853356		35561108		60207	93548	2482158	1227221
1.81_952.58		[M-H]-		952.581	ESI neg	1.81	1827754		2394112		2628610		2135179		2139760		2483161		2485980		2627915		2799806		3083868		2963282		2928916		0	0	41699	329922
1.81_962.07		[M-H]-		962.065	ESI neg	1.814	248024		207642		176370		342000		227838		241336		213078		155640		137885		115268		193065		125279		0	0	333331	252784
1.82_352.10		[M-H]-		352.104	ESI neg	1.823	814913		373520		603636		443280		747216		865573		1218805		612192		235712		387293		430324		327738		0	0	299665	144410
1.82_363.18		[M-H]-		363.182	ESI neg	1.821	493028		227449		626613		150230		344162		345101		437338		351490		258955		384865		253707		356415		0	0	253937	113941
1.82_373.11		[M-H]-		373.114	ESI neg	1.816	461991		395943		671501		492199		548303		514490		474237		336284		454602		529850		456212		367672		0	0	308150	121213
1.82_483.08		[M-H]-		483.078	ESI neg	1.817	475098		318508		429498		281722		506626		426282		428981		439377		333269		417593		480840		396083		0	1782	273273	183223
1.82_625.07		[M-H]-		625.066	ESI neg	1.817	287030		284224		291646		145196		313943		276364		296885		321295		167100		238590		177374		205553		0	0	172123	75621
1.83_1031.10		[M-H]-		1031.1	ESI neg	1.826	438298		268981		376708		302658		431686		467965		444418		455836		209389		281475		303964		215263		0	0	178692	98113
1.83_333.19		[M-H]-		333.192	ESI neg	1.829	365353		460763		507057		243857		641299		370240		514531		286391		762391		912821		566983		806059		0	0	384191	193742
1.83_397.13		[M-H]-		397.135	ESI neg	1.831	678350		733082		807857		577633		1087294		289316		398127		213189		762667		223799		1084402		230060		0	0	131315	66196
1.83_431.12		[M-H]-		431.119	ESI neg	1.831	197966		141512		285793		181143		228514		175634		180992		177111		4706		237930		173001		190750		0	0	105625	55362
1.83_548.06		[M-H]-		548.063	ESI neg	1.833	1928363		2437639		33327		1490932		1930520		30972		94456		26715		2253265		15031		1977899		15238		0	0	65807	23002
1.83_551.04		[M-H]-		551.039	ESI neg	1.829	2221767		1885916		2376335		1818532		2928668		2678235		2302914		2701241		2550016		2486939		2584246		2233208		8427	9552	1504080	760348
1.83_589.07		[M-H]-		589.073	ESI neg	1.827	107013		72307		101532		11480		95520		84851		100335		60532		66701		49670		70194		44454		0	0	123948	76315
1.83_636.09		[M-H]-		636.094	ESI neg	1.83	443512		304023		455868		313851		558819		461934		455720		512118		404467		492365		523717		458089		0	0	268037	115850
1.83_868.08		[M-H]-		868.08	ESI neg	1.834	1527645		1306765		1665699		1129978		2413427		2000453		1641802		2288176		1894150		2185485		1984294		2279279		0	0	1061850	385145
1.83_933.06		[M-H]-		933.065	ESI neg	1.826	1856266		2110667		2104163		3015946		2643014		2587040		2193158		2725652		1849714		2249257		2077386		2299394		0	2379	2099682	1138791
1.84_319.09		[M-H]-		319.094	ESI neg	1.843	1138324		656002		919506		845135		1286195		520934		54155		8162		1853776		41333		1874090		205443		0	0	18990	348600
1.84_323.13		[M-H]-		323.135	ESI neg	1.844	678946		740623		959984		554826		795883		6800		10163		810136		1043739		24347		1142777		0		0	0	5046	216124
1.84_453.04		[M-H]-		453.039	ESI neg	1.84	11387477		11741780		12475979		11400298		11474776		12644939		12261390		12453137		12143177		13032379		14099726		12610190		89801	164803	9298172	5528722
1.84_466.03		[M-H]-		466.028	ESI neg	1.841	4784619		5424460		5077364		6574556		5739846		2422542		2598974		5608130		4284701		4174760		4340305		3809560		54375	74764	2455582	3322357
1.84_474.84		[M-H]-		474.845	ESI neg	1.844	215440		152354		218165		73554		209294		235268		263617		211082		247375		228267		225619		250196		0	0	59344	123470
1.84_627.08		[M-H]-		627.081	ESI neg	1.843	853969		242204		534187		988801		659731		471291		842818		601339		193788		211659		200945		267659		0	2431	396751	302381
1.84_654.10		[M-H]-		654.097	ESI neg	1.845	226965		229737		298461		166621		218423		310020		297862		225630		331407		294650		284445		268612		0	0	156999	28364
1.84_784.07		[M-H]-		784.072	ESI neg	1.836	1052280		1209629		1256921		1372746		1121742		1156691		2175702		2086067		1016221		2523340		1219782		2488306		3741	8333	1328606	938465
1.84_867.07		[M-H]-		867.072	ESI neg	1.841	175855		275090		200622		186574		225349		195127		207278		263345		280900		248206		253325		252040		0	0	201355	161109
1.84_893.07		[M-H]-		893.07	ESI neg	1.84	4944		44801		41287		21243		17111		26662		26638		11125		38184		52162		40368		44918		0	0	69628	13079
1.85_247.02		[M-H]-		247.025	ESI neg	1.848	246890		204182		287085		37429		353551		290358		372157		360409		185697		276507		123135		278550		0	0	114293	56306
1.85_286.09		[M-H]-		286.093	ESI neg	1.847	259338		469886		749153		206670		850567		569615		469059		489614		823903		1678073		1256424		1548822		0	0	448232	197890
1.85_291.01		[M-H]-		291.015	ESI neg	1.849	12167975		7409532		11109369		6046750		14253532		12085543		14650398		13769739		5916776		8227342		8024552		9204758		14172	60637	5302515	2444558
1.85_451.09		[M-H]-		451.089	ESI neg	1.853	253817		189855		251540		219056		257382		264742		254126		248863		197290		229660		280931		239986		0	0	230219	132798
1.85_515.05		[M-H]-		515.047	ESI neg	1.847	2484860		1470274		1998690		1659504		2129704		2528585		2235593		2349584		1234960		1303811		1295838		1134427		0	3327	1245857	920888
1.85_596.06		[M-H]-		596.063	ESI neg	1.853	42440		36451		9607		25041		46437		25034		17931		6339		19394		0		22191		0		0	0	12716	70025
1.85_627.04		[M-H]-		627.044	ESI neg	1.852	259467		221678		272918		211561		335027		324628		8187		295792		242025		16055		248617		24575		0	2574	22710	92485
1.85_748.61		[M-H]-		748.608	ESI neg	1.851	243082		218701		288787		202306		280454		317779		303251		246920		113136		165729		206324		156722		0	0	152090	92494
1.85_786.09		[M-H]-		786.088	ESI neg	1.852	3217770		2498214		3005210		2296323		5209820		4384404		3226822		4852028		3250154		4165022		3593425		4205864		4535	3926	2912712	1301055
1.85_867.57		[M-H]-		867.574	ESI neg	1.849	128376		176273		165791		162733		174129		197696		179818		199843		239714		202668		237614		237739		0	0	177655	163009
1.85_929.08		[M-H]-		929.079	ESI neg	1.848	273941		290066		316794		228807		286904		350110		304052		365183		255076		421013		385297		439312		0	0	151323	36397
1.85_942.07		[M-H]-		942.07	ESI neg	1.846	920466		1128356		1188580		1513538		1308073		1314946		1237104		1308464		1196592		1214190		2581183		1180271		0	0	910293	462922
1.85_954.08		[M-H]-		954.085	ESI neg	1.855	637470		719908		849078		636889		765291		848145		811137		845194		804322		906179		975269		957087		0	0	459332	230859
1.86_392.04		[M-H]-		392.039	ESI neg	1.863	7912384		5978860		7151760		6262658		10551149		9450372		7394205		9561354		8628604		9015398		8249674		8913118		49934	62985	7885385	4060764
1.86_517.04		[M-H]-		517.044	ESI neg	1.856	279171		216650		175446		199014		279629		252847		268951		287447		135196		133403		211021		152879		0	0	196950	113609
1.86_520.11		[M-H]-		520.11	ESI neg	1.862	169017		132833		147951		21100		197609		264270		177512		181281		62376		150180		101516		68755		0	0	121652	46489
1.86_563.05		[M-H]-		563.05	ESI neg	1.86	472071		578980		771469		523829		581777		554489		507231		542405		590899		722588		769354		620553		0	0	417575	173448
1.86_612.08		[M-H]-		612.076	ESI neg	1.861	1025858		1084776		344957		943390		1473365		391421		416093		338850		642050		266978		1061580		236877		3376	2407	347399	174799
1.86_783.07		[M-H]-		783.069	ESI neg	1.864	1476984		2996901		3267328		3756218		2853391		3051090		5683796		1996566		2682953		2836968		3076830		6549355		24385	42913	3096159	2535652
1.86_934.07		[M-H]-		934.069	ESI neg	1.862	867795		1051956		964132		1435458		1229928		1254020		1095263		1342987		908008		1112939		1012760		1107870		0	0	1011381	569826
1.86_939.02		[M-H]-		939.018	ESI neg	1.863	504461		569928		863185		152874		600764		678493		773067		692884		607698		1233056		1031020		1003541		0	0	64678	2393
1.87_189.08		[M-H]-		189.077	ESI neg	1.872	113845		129001		118302		107262		212816		223468		210246		200240		129318		189005		178950		172266		8712	7481	114549	62749
1.87_378.04		[M-H]-		378.041	ESI neg	1.872	355969		284914		346337		216255		374907		403773		433864		377674		192377		228734		309275		224052		0	1838	193718	98535
1.87_449.04		[M-H]-		449.036	ESI neg	1.868	128262		169457		234448		99869		205957		280263		212936		273252		333639		427750		348653		488938		0	0	31104	8450
1.87_687.07		[M-H]-		687.074	ESI neg	1.866	285221		221178		330918		203361		267923		308478		300541		245186		136347		266477		244377		162183		0	0	137820	78224
1.87_747.10		[M-H]-		747.103	ESI neg	1.868	1364849		1252344		1540473		1124683		1573885		1622317		1513585		1339017		815188		982078		1091261		798002		0	0	835498	529668
1.87_859.07		[M-H]-		859.074	ESI neg	1.874	738479		830876		510704		6529537		6445052		687935		395586		999050		7111771		696059		6648174		618287		4548	0	459013	277216
1.88_1103.08		[M-H]-		1103.08	ESI neg	1.876	172524		181037		255885		127234		281321		292093		221544		285708		292548		341005		306012		271350		0	0	90276	37996
1.88_309.10		[M-H]-		309.098	ESI neg	1.877	254310		178849		225430		143590		260732		237962		326526		296543		135489		221157		214730		231513		0	0	140611	74344
1.88_352.10		[M-H]-		352.104	ESI neg	1.88	814913		373520		505999		443280		747216		1005311		1295753		899831		235712		457811		430324		451432		0	0	371540	198684
1.88_409.17		[M-H]-		409.172	ESI neg	1.883	633880		884173		1251584		663760		1027151		954277		1151222		1069184		1580662		1886527		1777061		1704044		0	0	516762	269070
1.88_421.17		[M-H]-		421.172	ESI neg	1.883	284007		526503		970296		665268		455528		659618		660382		576943		773317		610808		510773		594573		3022	0	220834	115646
1.88_440.99		[M-H]-		440.993	ESI neg	1.879	166825		188345		89704		253961		84022		96062		65499		99530		171795		50176		52163		37429		13164	2291	305780	170157
1.88_468.21		[M-H]-		468.209	ESI neg	1.88	442911		468288		629451		462060		451129		563295		558898		662198		634096		575683		652457		402786		0	0	501040	359843
1.88_482.04		[M-H]-		482.041	ESI neg	1.878	185119		234269		202453		299453		198273		191069		166556		162699		171334		174875		113748		145491		0	0	205627	119170
1.88_631.06		[M-H]-		631.058	ESI neg	1.879	315810		529447		438095		353238		455994		446691		482580		503484		574052		812020		747056		857479		0	0	256511	121899
1.88_632.57		[M-H]-		632.568	ESI neg	1.883	236235		195794		122278		178822		256906		82808		228949		178055		170954		182520		210971		197644		0	0	38586	52447
1.88_647.09		[M-H]-		647.089	ESI neg	1.879	103185		103468		136639		72409		179928		149255		111540		210013		113302		158922		103425		178623		0	0	67219	19862
1.88_678.14		[M-H]-		678.144	ESI neg	1.875	204375		354095		487069		186288		218011		299570		358971		276219		471795		537669		485971		315482		0	0	129195	16568
1.88_785.09		[M-H]-		785.085	ESI neg	1.876	3830176		2974317		8168504		2009114		14006628		11783325		8664720		12949251		3818529		11166994		3911336		11449661		3915	25380	7695549	3410576
1.88_859.58		[M-H]-		859.576	ESI neg	1.883	392484		443044		324916		3431771		3483854		418025		371299		603847		807002		478493		3479263		535804		0	0	315918	147944
1.88_891.14		[M-H]-		891.135	ESI neg	1.881	228045		250076		326913		155122		286011		313899		283708		280865		189120		196266		201370		219089		0	0	140486	100716
1.88_952.08		[M-H]-		952.079	ESI neg	1.878	571742		685798		15029125		429270		514605		14697877		14652190		15083731		708465		17813590		657270		16830414		3549	2938	7317046	3195008
1.89_397.14		[M-H]-		397.135	ESI neg	1.885	678350		733082		807857		577633		1087294		1103966		1227412		1140581		762667		1066055		1084402		1016278		0	0	579063	242586
1.89_446.03		[M-H]-		446.031	ESI neg	1.889	206930		309531		241048		185750		216963		175896		240394		228551		296456		338521		264005		341134		0	0	193332	102142
1.89_468.02		[M-H]-		468.021	ESI neg	1.886	146803		71278		118175		43390		122152		138382		129968		141286		85683		150838		158366		97871		0	0	90353	28918
1.89_473.06		[M-H]-		473.065	ESI neg	1.889	532004		578003		587565		272135		417721		495978		525863		528082		469769		568188		408296		428564		0	0	310100	126437
1.89_474.03		[M-H]-		474.026	ESI neg	1.886	126159		102356		98286		146510		127762		99951		135650		124408		129060		125806		132085		121730		4386	3976	157259	124028
1.89_548.06		[M-H]-		548.063	ESI neg	1.889	1928363		2437639		2666198		1490932		1930520		2229824		2161633		1923497		2253265		2547770		1977899		2061071		0	0	1330279	678641
1.89_609.06		[M-H]-		609.062	ESI neg	1.893	255379		118514		205599		109514		270240		242619		199034		200761		116255		164439		114665		95939		0	0	130624	59818
1.89_756.11		[M-H]-		756.108	ESI neg	1.894	346738		306863		346249		296458		423419		308699		436731		328748		226671		222186		323349		269775		0	0	189422	105256
1.89_864.19		[M-H]-		864.191	ESI neg	1.892	362999		386380		490802		333755		405510		491241		499692		427444		487752		517616		409912		463850		0	0	201095	119032
1.90_323.13		[M-H]-		323.135	ESI neg	1.896	678946		740623		959984		554826		795883		776788		933117		810136		1043739		1193601		1142777		1358248		0	0	497116	216124
1.90_401.09		[M-H]-		401.088	ESI neg	1.9	176502		51935		517582		276330		245482		533905		286161		404572		759993		670018		796966		610427		0	0	138708	59000
1.90_452.03		[M-H]-		452.031	ESI neg	1.902	2467456		2987224		3111570		1908134		2806100		2514646		2844670		2750332		3419636		4065738		4326938		3923138		3234	13499	2341591	1055493
1.90_603.07		[M-H]-		603.071	ESI neg	1.899	14302643		13284078		14952681		10585477		14859036		13493361		17000858		14868902		9014763		10658378		10585960		10030160		4458	27681	6675004	3224324
1.91_259.12		[M-H]-		259.119	ESI neg	1.906	351900		933084		1392648		1432513		835522		566086		455820		324116		502674		310622		447323		322635		10218	8128	271140	150627
1.91_453.04		[M-H]-		453.039	ESI neg	1.912	11330266		11518652		12784422		7952348		10351546		10497795		11125831		11082337		10799259		14784693		14099726		12805155		47500	52263	4989793	2758928
1.91_481.10		[M-H]-		481.099	ESI neg	1.913	229493		205369		260061		173298		341553		315105		291961		274269		155763		224267		232539		219396		0	0	156119	69444
1.91_550.06		[M-H]-		550.06	ESI neg	1.911	414859		297662		360942		196838		388848		391816		350879		415484		289294		269557		209097		379219		0	0	224228	94428
1.91_559.04		[M-H]-		559.037	ESI neg	1.912	558654		565061		733764		420008		626817		578054		648007		590801		521553		673260		197236		601187		0	0	263322	106118
1.91_596.10		[M-H]-		596.098	ESI neg	1.909	508944		537211		496592		230380		245259		473534		511288		501636		574685		607474		261612		514102		0	0	449678	275409
1.91_612.08		[M-H]-		612.076	ESI neg	1.914	1025858		1084776		1009056		943390		1473365		1057549		1247074		1159478		642050		808237		1061580		827792		3376	2407	622688	314490
1.91_858.07		[M-H]-		858.067	ESI neg	1.907	6235682		9531212		10398871		11950234		9767867		9080669		10003520		9168421		11487162		11278866		11097225		14254424		11753	20440	6169373	3713305
1.91_907.09		[M-H]-		907.086	ESI neg	1.914	4533900		4562990		5259557		2984104		4570516		4843222		4764426		4770767		4330338		7451179		6195011		6012211		0	0	1576056	704396
1.91_994.10		[M-H]-		994.1	ESI neg	1.914	305570		338879		417838		407864		417383		384842		467232		415194		492497		490010		115292		520087		0	0	203925	110379
1.92_595.09		[M-H]-		595.095	ESI neg	1.921	1195805		1037095		1721040		851199		976066		1712127		1896118		1051021		864189		2188331		881125		1944630		0	1936	1700250	967204
1.92_708.07		[M-H]-		708.071	ESI neg	1.923	506259		422943		509006		436278		521749		436946		493479		471115		369087		414901		433544		420037		0	0	311970	169473
1.92_906.07		[M-H]-		906.074	ESI neg	1.921	271128		354796		397026		211170		373987		321154		351814		320444		424102		612004		549370		507264		0	0	184378	73691
1.92_942.57		[M-H]-		942.572	ESI neg	1.916	1273282		1613635		879727		1736814		1680504		1711163		1670260		1642049		1756428		2309736		2377024		2487285		0	0	974102	557649
1.93_241.14		[M-H]-		241.145	ESI neg	1.931	120682		283394		175021		98861		188037		169923		104828		202493		140712		164607		148348		75180		0	1531	88268	49060
1.93_289.07		[M-H]-		289.072	ESI neg	1.934	857736		481962		1081185		695512		556471		920574		878575		776502		711102		679004		711849		687959		0	1602	369168	371068
1.93_327.10		[M-H]-		327.099	ESI neg	1.933	227333		93571		104502		154071		271424		173762		119404		152441		73842		77245		113091		89453		0	0	156865	77829
1.93_339.11		[M-H]-		339.108	ESI neg	1.926	21593178		10102505		15220015		15314505		21158828		14758188		28743572		15032159		5532426		6503718		8892794		7524112		0	0	8868840	4314532
1.93_410.18		[M-H]-		410.182	ESI neg	1.929	254533		195950		404247		124163		248256		469875		466651		313736		283315		267589		170180		396127		0	0	184457	75722
1.93_486.05		[M-H]-		486.055	ESI neg	1.933	437681		594682		591397		245180		595484		610626		465331		615051		546415		676493		683213		643625		0	0	320935	99072
1.93_618.08		[M-H]-		618.076	ESI neg	1.928	373531		372814		338958		312941		17233		340330		426864		311265		190432		197196		170796		188237		0	0	329324	162464
1.93_636.09		[M-H]-		636.092	ESI neg	1.93	716544		611012		693488		487127		915024		784706		892641		879555		580058		683956		747357		813092		0	2476	414010	153112
1.93_679.22		[M-H]-		679.225	ESI neg	1.926	409219		72480		208600		220383		376823		182141		788520		231018		24936		24955		59981		31700		0	0	60170	3990
1.94_1062.11		[M-H]-		1062.11	ESI neg	1.941	384813		401274		528578		147846		385346		440618		357961		439306		199804		246742		198684		206696		0	0	167485	83013
1.94_1070.61		[M-H]-		1070.61	ESI neg	1.935	149921		290395		286645		84476		145633		312444		335634		354264		101500		315773		88859		241373		0	0	126731	22390
1.94_447.02		[M-H]-		447.021	ESI neg	1.942	226593		287839		344825		169399		378889		353884		362246		412800		303645		496498		418616		489546		0	0	143927	53265
1.94_447.15		[M-H]-		447.151	ESI neg	1.941	646555		456242		750816		438922		814300		728246		825335		511281		351985		707661		716690		514657		0	0	291143	148000
1.94_451.02		[M-H]-		451.023	ESI neg	1.944	235255		53331		215943		261887		268621		199966		228772		204536		200801		189696		233442		209273		0	0	274420	240321
1.94_467.53		[M-H]-		467.532	ESI neg	1.941	1211405		1894266		1534501		1632148		1418792		1619599		1478107		1709890		1979891		2136301		2046453		2047760		7850	14045	1229684	700779
1.94_541.05		[M-H]-		541.055	ESI neg	1.936	912763		1034944		993845		695801		498237		910567		892668		1037132		882727		994748		543213		985220		0	0	690157	344743
1.94_577.14		[M-H]-		577.135	ESI neg	1.94	896448		520807		1143580		215078		279813		750425		839556		675196		244430		554192		579904		682220		0	2043	305430	155637
1.94_602.06		[M-H]-		602.063	ESI neg	1.936	1488612		1695166		2045704		1676996		1604086		1628808		1834414		1422240		1627591		1854044		2061466		1967020		0	3896	1036458	539473
1.94_610.06		[M-H]-		610.06	ESI neg	1.94	358248		350007		332545		374757		718017		353904		570682		349196		253392		193863		381865		258566		0	0	241129	125702
1.94_671.07		[M-H]-		671.066	ESI neg	1.944	166187		130720		141955		88935		218228		153097		156923		170399		89211		117714		143963		145100		0	0	96013	70827
1.95_1145.09		[M-H]-		1145.09	ESI neg	1.952	91640		136040		138349		276965		211457		109341		106294		131573		523308		249016		332858		384560		0	2606	54414	28693
1.95_315.11		[M-H]-		315.109	ESI neg	1.952	262743		382760		431929		187616		270282		297218		368956		313701		366928		428289		342956		452409		0	0	307693	152670
1.95_341.11		[M-H]-		341.114	ESI neg	1.954	565302		3131		67530		19512		3640		366939		770693		412670		7247		174799		14402		201014		0	0	233564	108373
1.95_387.13		[M-H]-		387.13	ESI neg	1.949	183266		166638		255835		139535		196054		172830		182918		226113		209074		305087		210006		238822		0	0	140497	69605
1.95_632.07		[M-H]-		632.066	ESI neg	1.953	986596		784034		957116		672288		781759		983152		888767		829486		601792		742141		804330		634120		0	0	549322	333488
1.95_785.09		[M-H]-		785.085	ESI neg	1.946	8728123		2974317		3716398		4783618		10301120		4427458		4064323		4628424		6889155		5289324		9245787		5038609		3915	8068	2279670	1016859
1.95_933.07		[M-H]-		933.065	ESI neg	1.945	7622682		11924877		11232125		9768481		11267864		11445222		10971766		12559404		14637603		18679860		16918064		17786936		3416	15758	6163196	2618216
1.96_193.05		[M-H]-		193.05	ESI neg	1.957	1296402		360274		704008		918778		1034128		901109		1411942		1048307		350910		420405		532091		544974		0	3776	439171	251071
1.96_309.03		[M-H]-		309.025	ESI neg	1.957	40796		63935		38105		38254		71457		51766		84392		82949		39111		41795		19026		72377		0	0	61319	10408
1.96_391.08		[M-H]-		391.08	ESI neg	1.96	1434588		391896		585153		1125592		1077929		875907		1320340		957466		269849		357563		51380		424084		0	0	610522	448234
1.96_399.04		[M-H]-		399.036	ESI neg	1.957	279140		176775		350618		46483		284557		361340		429181		341179		183992		471241		363785		325129		0	0	22644	4510
1.96_401.11		[M-H]-		401.109	ESI neg	1.957	11380230		3682623		6277388		8287697		9616728		8466263		13109407		9291889		2925448		3752491		4582159		4985246		0	0	4044214	2185505
1.96_418.10		[M-H]-		418.099	ESI neg	1.957	1267890		309421		440877		929239		867626		731269		1107136		805432		201665		256801		301130		331651		0	0	568152	553497
1.96_463.05		[M-H]-		463.052	ESI neg	1.962	9420573		7443288		8401290		5214180		8605027		10642360		9568287		9833622		7101434		9386881		8173712		8300865		80316	108690	6647277	3487672
1.96_465.85		[M-H]-		465.848	ESI neg	1.957	144952		170459		146846		208150		119585		128356		113887		204013		217020		148980		239635		268821		0	0	158683	40153
1.96_466.21		[M-H]-		466.212	ESI neg	1.96	140241		230705		178949		160022		179880		166469		174632		189680		245701		297627		232141		216438		0	0	110605	76568
1.96_477.02		[M-H]-		477.019	ESI neg	1.96	481565		552069		395009		704837		368962		456844		326816		405124		335781		407661		464937		326919		0	4196	732013	614351
1.96_588.07		[M-H]-		588.066	ESI neg	1.964	261830		310404		167656		170633		255223		216756		315166		306153		124863		136199		152737		154953		0	0	1333019	694006
1.96_605.08		[M-H]-		605.08	ESI neg	1.958	115761		97965		119985		46919		142505		134069		135389		181249		95551		176036		122244		131243		0	0	148506	23595
1.96_644.08		[M-H]-		644.084	ESI neg	1.958	457401		242858		387917		504951		544310		427955		713477		554312		194160		310030		366722		385044		0	0	163776	41722
1.96_891.13		[M-H]-		891.134	ESI neg	1.958	274154		233413		270300		155122		201842		310376		262641		299616		174680		224744		187478		178239		0	0	138106	79815
1.96_891.63		[M-H]-		891.631	ESI neg	1.963	258466		226762		275176		38916		222014		259643		269577		259543		122901		187321		75085		172148		0	0	123714	78315
1.97_250.07		[M-H]-		250.072	ESI neg	1.971	969885		1411129		1688780		650468		1783394		1425178		3590		1017306		869243		1092885		1087306		1371716		0	0	924155	333408
1.97_516.49		[M-H]-		516.491	ESI neg	1.967	187010		329225		127176		334762		76597		127576		96700		130506		265754		47168		140850		51584		830	1892	300699	129567
1.97_621.02		[M-H]-		621.016	ESI neg	1.968	935332		655142		901397		442244		1002355		955974		831197		930230		743935		978374		998856		828832		0	5370	453553	135948
1.97_729.15		[M-H]-		729.147	ESI neg	1.972	312548		188378		318522		142330		404419		369245		389697		359214		122793		218610		256195		252219		0	0	132565	58874
1.97_747.60		[M-H]-		747.605	ESI neg	1.973	486892		274852		411425		180707		313096		360324		406434		402554		172967		240494		267537		238326		0	0	189942	109363
1.98_307.01		[M-H]-		307.01	ESI neg	1.983	125389		114575		178637		86602		194253		185399		238203		231910		169857		278597		220078		257668		0	0	51263	15950
1.98_321.10		[M-H]-		321.098	ESI neg	1.982	813661		323287		610815		560707		632463		607872		972535		578528		295155		368914		348657		357326		0	0	176530	84222
1.98_367.10		[M-H]-		367.103	ESI neg	1.984	482234		174421		352201		342113		353023		339162		537597		351651		176388		183592		196515		206229		0	0	99724	43949
1.98_474.03		[M-H]-		474.026	ESI neg	1.976	154257		112666		95108		74740		131355		122884		138487		142747		97540		79431		41530		87280		3754	2056	146740	92634
1.98_576.13		[M-H]-		576.128	ESI neg	1.984	897268		785743		1143644		618475		763390		1006798		1058123		885078		774927		908921		786252		841335		0	0	407138	239612
1.98_687.07		[M-H]-		687.074	ESI neg	1.978	291612		187183		290629		182756		228638		318708		296762		282739		137661		245838		269940		201598		0	0	117775	67318
1.98_701.03		[M-H]-		701.034	ESI neg	1.979	218693		213043		240428		153166		203747		253101		96539		207925		158064		200676		251342		179159		0	2173	155675	77633
1.98_747.10		[M-H]-		747.102	ESI neg	1.976	643376		393225		545149		248353		434775		534981		573459		547772		220139		339077		304463		286570		0	0	228405	146112
1.98_865.20		[M-H]-		865.199	ESI neg	1.975	860816		545159		929669		461735		724239		923372		930167		815763		626326		776075		715169		754436		0	0	320654	187659
1.98_869.06		[M-H]-		869.058	ESI neg	1.984	175856		247119		135398		354522		172635		175214		155655		174716		167786		132246		181436		145325		0	0	260058	310786
1.99_259.12		[M-H]-		259.119	ESI neg	1.992	320943		597476		746186		983656		800757		450837		263286		171776		408375		333980		368609		292169		12603	10452	186793	99603
1.99_385.11		[M-H]-		385.114	ESI neg	1.986	772759		479951		805552		366899		581995		679202		590877		1006137		772451		827115		828671		747792		0	0	418537	205585
1.99_446.03		[M-H]-		446.031	ESI neg	1.992	97312		192808		107727		124178		132400		122594		157730		159679		138470		168318		172503		153158		2871	0	154565	84344
1.99_452.03		[M-H]-		452.031	ESI neg	1.993	355438		493795		411753		357412		382295		364358		521502		422874		514787		544345		711382		585782		0	7014	942284	516196
1.99_708.07		[M-H]-		708.072	ESI neg	1.99	235505		262254		233225		219150		267231		254512		292993		289693		230754		274946		315305		245807		0	0	221413	111468
1.99_720.16		[M-H]-		720.16	ESI neg	1.989	482962		470080		523745		429738		443054		207057		647142		489515		426324		408865		557886		598201		0	0	266930	156209
1.99_823.11		[M-H]-		823.108	ESI neg	1.99	234967		158404		237596		163254		251690		265177		298036		248455		92939		127818		151111		127589		0	0	129007	58687
2.00_1144.76		[M-H]-		1144.76	ESI neg	2.003	50222		221507		226952		311760		228654		181220		228184		250853		448424		324173		296172		427035		0	0	98081	32630
2.00_359.09		[M-H]-		359.09	ESI neg	2	376721		174284		272839		227862		232226		208694		336032		204159		70420		53836		76650		65312		0	0	174317	133161
2.00_369.12		[M-H]-		369.119	ESI neg	2.001	4530738		2409858		3960561		2949341		3721752		3510568		6153995		3417775		1307852		1398094		1566159		1579444		0	0	1904838	957786
2.00_618.04		[M-H]-		618.04	ESI neg	1.995	305801		269228		314678		213150		359301		331201		352902		361601		218505		275939		284226		216552		0	0	210156	110256
2.00_708.57		[M-H]-		708.573	ESI neg	1.999	135929		168486		123060		161989		155741		182889		211268		190497		138824		166372		177758		141785		0	0	120637	69518
2.00_861.09		[M-H]-		861.086	ESI neg	1.999	529041		400230		213210		269648		541251		262180		234287		637977		461140		291167		547789		281924		0	0	146751	113186
2.00_905.07		[M-H]-		905.071	ESI neg	2.002	84757		93596		58840		79992		116052		85169		145040		106094		95602		140756		183654		157595		0	0	135391	63728
2.01_1145.09		[M-H]-		1145.09	ESI neg	2.006	91640		230723		267297		276965		211457		198429		222703		242879		523308		423069		332858		409613		0	2606	93506	34781
2.01_297.13		[M-H]-		297.134	ESI neg	2.009	57028		109915		64076		20962		75762		30992		46030		60410		81560		60031		31606		67910		0	0	97419	41437
2.01_337.09		[M-H]-		337.093	ESI neg	2.013	170556		138115		201036		120673		203281		131465		230180		172586		80446		85546		22564832		144557		0	0	115659	52289
2.01_393.54		[M-H]-		393.543	ESI neg	2.006	557394		458288		406374		240630		424462		457900		407990		467974		316638		334461		363471		306488		0	1602	303112	131616
2.01_403.03		[M-H]-		403.029	ESI neg	2.01	348585		268770		160972		207323		224478		214614		211717		209736		95150		134495		140007		90035		0	4267	386855	269712
2.01_410.03		[M-H]-		410.027	ESI neg	2.011	893899		689290		560132		481052		692198		715220		634711		703112		432687		437588		502075		484230		0	7684	636434	461881
2.01_437.11		[M-H]-		437.108	ESI neg	2.013	230229		144696		231047		154833		195316		207002		281751		185862		174297		72936		232493		279139		0	0	153681	85185
2.01_440.99		[M-H]-		440.993	ESI neg	2.01	262060		275084		134899		205760		97863		124361		95013		109016		172064		57671		91784		16553		4516	1599	308227	114976
2.01_541.05		[M-H]-		541.055	ESI neg	2.007	461885		600665		571033		393983		498237		513281		592712		593417		464912		471265		543213		476858		0	0	377900	226993
2.01_679.08		[M-H]-		679.076	ESI neg	2.008	2694492		2152159		2750030		2258231		2689007		3020158		3552824		2954302		1428145		1820184		1795851		1590195		0	0	1543266	832744
2.01_821.06		[M-H]-		821.062	ESI neg	2.011	245749		155342		133700		114414		183956		226167		164515		238780		110019		147048		142817		134075		0	0	166987	97357
2.01_858.07		[M-H]-		858.067	ESI neg	2.008	6754691		11732882		10306499		12270595		10834696		10573250		11983931		11986860		13313079		12798929		12854122		14610653		10429	27754	7691186	4045032
2.02_1085.07		[M-H]-		1085.07	ESI neg	2.02	218432		238621		237400		184726		274152		20194		223298		190197		188810		236094		234219		227317		0	0	149212	67660
2.02_275.02		[M-H]-		275.02	ESI neg	2.025	84178		67647		85790		45429		105730		75995		95558		96357		47353		103787		105454		107801		0	1629	70516	30430
2.02_392.04		[M-H]-		392.039	ESI neg	2.016	20766328		18086836		16871688		9630847		3017553		19419650		18396132		19660224		12556826		14714890		2487805		14124641		129489	145936	12106586	5444280
2.02_542.03		[M-H]-		542.034	ESI neg	2.018	890850		962422		867542		1106497		722906		828344		956626		970463		630382		736913		911196		657727		4800	6386	802335	534492
2.02_549.07		[M-H]-		549.071	ESI neg	2.018	462794		388452		343360		194624		408224		415971		306107		446280		336659		362191		279492		405891		0	0	287996	157202
2.02_602.06		[M-H]-		602.063	ESI neg	2.017	263409		288640		264356		318874		270415		289995		326878		267420		277335		351156		376455		333207		0	0	201654	109032
2.02_631.06		[M-H]-		631.057	ESI neg	2.02	250658		351460		356363		222073		332826		339444		388036		389747		412259		568133		22995		582913		0	0	176267	85807
2.02_785.08		[M-H]-		785.085	ESI neg	2.025	1970391		7193042		7942872		1468015		10301120		9805304		9247727		10212222		2433172		9442436		9245787		9689822		12441	28667	5143576	2195951
2.02_786.09		[M-H]-		786.088	ESI neg	2.017	3251670		2689945		3009401		639609		3733588		3665716		3558302		3854330		2577094		3447700		3512505		3633091		0	4525	1960504	799939
2.02_787.09		[M-H]-		787.092	ESI neg	2.02	1029348		773286		927013		542823		1265321		1186151		1095585		1220561		868957		1142984		1131151		1171454		0	0	615072	260374
2.02_860.08		[M-H]-		860.082	ESI neg	2.021	1152737		1605212		1388698		505270		716014		1354939		1629761		1535929		830449		2652887		1379119		1461500		2745	0	1178306	338546
2.02_934.57		[M-H]-		934.575	ESI neg	2.018	429902		752818		624773		483965		602627		427001		570826		552614		683589		742191		912552		869532		0	0	342105	210919
2.03_407.06		[M-H]-		407.062	ESI neg	2.032	249241		312141		408778		187424		396010		344905		434342		394644		293356		463663		486916		471717		0	0	144811	62361
2.03_468.54		[M-H]-		468.54	ESI neg	2.026	2745736		2422922		2206713		1529743		2641921		2373222		2128236		2243960		1847980		1860821		1651385		1883202		4944	16491	1899393	1365345
2.03_478.03		[M-H]-		478.027	ESI neg	2.034	790736		691024		407103		785052		450126		417273		434952		402523		303694		286909		311288		292069		14545	42687	1102211	1794674
2.03_720.66		[M-H]-		720.66	ESI neg	2.028	400382		389893		438274		331561		132351		413204		543710		367049		199371		390336		219580		466474		0	0	225586	118985
2.03_943.57		[M-H]-		943.575	ESI neg	2.027	286538		561318		531449		519907		540923		601386		640428		285686		390217		774633		466662		725485		0	0	387983	197012
2.04_466.85		[M-H]-		466.852	ESI neg	2.037	362635		303286		241079		173096		270201		302190		222650		256242		167173		217404		196009		257445		0	0	204394	80058
2.04_467.04		[M-H]-		467.036	ESI neg	2.035	68301280		61216616		56803824		38546316		68164200		61544772		53565352		58690240		46300320		49201832		41651376		50182388		453502	491108	47661260	34724928
2.04_467.22		[M-H]-		467.22	ESI neg	2.038	271080		212253		230524		179682		342085		240661		224241		298527		224586		216295		161626		184321		0	0	219418	179942
2.04_485.02		[M-H]-		485.024	ESI neg	2.036	354430		324899		260840		262494		335716		255798		252944		256532		237671		202557		184947		179068		3368	0	366072	381020
2.04_498.53		[M-H]-		498.534	ESI neg	2.038	497456		476324		361615		414310		420629		406618		344113		405893		332479		260907		270717		286038		0	9221	536544	822203
2.04_527.06		[M-H]-		527.065	ESI neg	2.039	365062		368956		424402		429691		259406		332359		460882		293843		371048		400692		507738		445549		0	0	290329	219841
2.04_869.09		[M-H]-		869.088	ESI neg	2.043	232628		183467		236120		239068		325248		196785		256804		248875		321271		325405		486363		338343		0	0	133216	59494
2.04_935.08		[M-H]-		935.08	ESI neg	2.035	18341442		15609356		15796769		7710628		21353396		17984340		14521984		17150550		10697974		13628558		10219049		13792146		12204	42721	10668463	6114616
2.05_1019.08		[M-H]-		1019.08	ESI neg	2.052	3301123		2061897		2134539		1629955		3807534		3507725		3168178		3764297		2188560		2623054		2616654		3068418		0	0	1980891	1030193
2.05_470.01		[M-H]-		470.008	ESI neg	2.05	822588		618950		1043380		420859		785933		850689		762713		864249		535362		794447		867942		710275		0	17990	456829	276306
2.05_529.04		[M-H]-		529.043	ESI neg	2.053	972672		671472		332110		772231		871744		825570		712228		846745		651911		727506		852470		683968		3571	10592	637469	485847
2.05_617.03		[M-H]-		617.032	ESI neg	2.051	1409274		1821873		1195959		1773275		1203503		1231836		1302921		1092768		1295483		1476284		1731520		1199153		6608	26298	1569208	1320788
2.05_637.09		[M-H]-		637.095	ESI neg	2.054	728729		319697		559123		398385		740669		432053		572959		483042		414803		432916		423387		386160		0	0	241115	103595
2.05_671.07		[M-H]-		671.066	ESI neg	2.054	187353		211012		197412		263699		260080		184059		194994		201183		266019		268169		313496		280964		0	0	192797	183007
[truncated: 3,282 more rows]

## Sheet: iSTDs
					Label	T1_N_L		T1_E_L		T1_S_L		T1_W_L		T2_N_L		T2_E_L		T2_S_L		T2_W_L		T3_N_L		T3_E_L		T3_S_L		T3_W_L		MtdBlank001	MtdBlank002	MtdBlank003	PoolQC002	PoolQC003
					Sample #	1		3		5		7		9		11		13		15		17		19		21		23		Blank	Blank	Blank	QC	QC
					Species	English Walnut		English Walnut		English Walnut		English Walnut		English Walnut		English Walnut		English Walnut		English Walnut		English Walnut		English Walnut		English Walnut		English Walnut					English Walnut	English Walnut
					Organ	Seed Coat/Pellicle		Seed Coat/Pellicle		Seed Coat/Pellicle		Seed Coat/Pellicle		Seed Coat/Pellicle		Seed Coat/Pellicle		Seed Coat/Pellicle		Seed Coat/Pellicle		Seed Coat/Pellicle		Seed Coat/Pellicle		Seed Coat/Pellicle		Seed Coat/Pellicle					Seed Coat/Pellicle	Seed Coat/Pellicle
					Treatment	Light Colored Seed Coat		Light Colored Seed Coat		Light Colored Seed Coat		Light Colored Seed Coat		Light Colored Seed Coat		Light Colored Seed Coat		Light Colored Seed Coat		Light Colored Seed Coat		Light Colored Seed Coat		Light Colored Seed Coat		Light Colored Seed Coat		Light Colored Seed Coat
					File ID	Dandekar013_MX686404_posPP_T1-N-L-001.raw		Dandekar007_MX686404_posPP_T1-E-L-003.raw		Dandekar012_MX686404_posPP_T1-S-L-005.raw		Dandekar010_MX686404_posPP_T1-W-L-007.raw		Dandekar022_MX686404_posPP_T2-N-L-009.raw		Dandekar021_MX686404_posPP_T2-E-L-011.raw		Dandekar015_MX686404_posPP_T2-S-L-013.raw		Dandekar020_MX686404_posPP_T2-W-L-015.raw		Dandekar005_MX686404_posPP_T3-N-L-017.raw		Dandekar018_MX686404_posPP_T3-E-L-019.raw		Dandekar016_MX686404_posPP_T3-S-L-021.raw		Dandekar023_MX686404_posPP_T3-W-L-023.raw		MtdBlank001_MX686404_posPP_preDandekar001.raw	MtdBlank002_MX686404_posPP_postDandekar012.raw	MtdBlank003_MX686404_posPP_postDandekar024.raw	PoolQC002_MX686404_posPP_postDandekar012.raw	PoolQC003_MX686404_posPP_postDandekar024.raw
Identifier	Annotation	Species	InChI Key	m/z	RT	Peak Height		Peak Height		Peak Height		Peak Height		Peak Height		Peak Height		Peak Height		Peak Height		Peak Height		Peak Height		Peak Height		Peak Height		Peak Height	Peak Height	Peak Height	Peak Height	Peak Height
4.70_341.28	1_CUDA iSTD	[M+H]+	HPTJABJPZMULFH-UHFFFAOYSA-N	341.28	4.698	113501352		141977024		135656816		136775088		150378544		142597920		136362176		147823328		133193672		139311168		159397856		138867792		219458688	185119104	314094208	93722000	54485124
0.25_165.13	1_D3-L-Carnitine iSTD	[M+H]+		165.131	0.246	13445045		13792964		14241704		17290696		14438953		14654897		15685398		14752977		13041547		12143246		12334207		12242982		30535358	33352970	40965564	4827284	5037485
2.88_259.01	1_D4-Daidzein iSTD	[M+H]+	PTDBGXVJPZIESI-UHFFFAOYSA-N	259.01	2.884	176606		218418		183311		200358		195923		194228		180662		191355		212716		194115		182190		196358		239625	222948	256790	52647	42926
1.77_185.10	1_D5-Hippuric acid-d5 iSTD	[M+H]+		185.097	1.77	18945186		20743104		21509230		24653478		20959064		23741476		23810704		22159642		21632078		23285450		23831010		20686614		18728994	23853716	33637656	5355486	5287590
3.78_618.34	1_D9-Reserpine iSTD	[M+H]+		618.337	3.784	59177012		72070648		82323496		69566960		73245800		82947016		78257544		81570024		75516656		74804208		82032840		82800072		38538892	38961248	56977300	18177410	17522406
2.00_380.22	1_Val-Tyr-Val iSTD	[M+H]+		380.218	1.995	18650034		24455798		21768392		27125074		20970698		23362020		25930532		20501228		21378056		22993692		21984470		18379030		20162120	20291546	34049620	5917639	5765933
					Label	T1_N_L		T1_E_L		T1_S_L		T1_W_L		T2_N_L		T2_E_L		T2_S_L		T2_W_L		T3_N_L		T3_E_L		T3_S_L		T3_W_L		MtdBlank001	MtdBlank002	PoolQC002	PoolQC003
					Sample #	1		3		5		7		9		11		13		15		17		19		21		23		Blank	Blank	QC	QC
					Species	English Walnut		English Walnut		English Walnut		English Walnut		English Walnut		English Walnut		English Walnut		English Walnut		English Walnut		English Walnut		English Walnut		English Walnut				English Walnut	English Walnut
					Organ	Seed Coat/Pellicle		Seed Coat/Pellicle		Seed Coat/Pellicle		Seed Coat/Pellicle		Seed Coat/Pellicle		Seed Coat/Pellicle		Seed Coat/Pellicle		Seed Coat/Pellicle		Seed Coat/Pellicle		Seed Coat/Pellicle		Seed Coat/Pellicle		Seed Coat/Pellicle				Seed Coat/Pellicle	Seed Coat/Pellicle
					Treatment	Light Colored Seed Coat		Light Colored Seed Coat		Light Colored Seed Coat		Light Colored Seed Coat		Light Colored Seed Coat		Light Colored Seed Coat		Light Colored Seed Coat		Light Colored Seed Coat		Light Colored Seed Coat		Light Colored Seed Coat		Light Colored Seed Coat		Light Colored Seed Coat
					File ID	Dandekar013_MX686404_negPP_T1-N-L-001.raw		Dandekar007_MX686404_negPP_T1-E-L-003.raw		Dandekar012_MX686404_negPP_T1-S-L-005.raw		Dandekar010_MX686404_negPP_T1-W-L-007.raw		Dandekar022_MX686404_negPP_T2-N-L-009.raw		Dandekar021_MX686404_negPP_T2-E-L-011.raw		Dandekar015_MX686404_negPP_T2-S-L-013.raw		Dandekar020_MX686404_negPP_T2-W-L-015.raw		Dandekar005_MX686404_negPP_T3-N-L-017.raw		Dandekar018_MX686404_negPP_T3-E-L-019.raw		Dandekar016_MX686404_negPP_T3-S-L-021.raw		Dandekar023_MX686404_negPP_T3-W-L-023.raw		MtdBlank001_MX686404_negPP_preDandekar001.raw	MtdBlank002_MX686404_negPP_postDandekar012.raw	PoolQC002_MX686404_negPP_postDandekar012.raw	PoolQC003_MX686404_negPP_postDandekar024.raw
Identifier	Annotation	Species	InChI Key	m/z	RT	Peak Height		Peak Height		Peak Height		Peak Height		Peak Height		Peak Height		Peak Height		Peak Height		Peak Height		Peak Height		Peak Height		Peak Height		Peak Height	Peak Height	Peak Height	Peak Height
4.70_339.27	1_CUDA iSTD	[M-H]-		339.265	4.695	45991452		56760948		57291056		56289708		62514072		62538440		62745404		62702576		53433016		60721148		71915032		65647640		162150160	126567752	53744412	46347740
2.88_257.08	1_D4-Daidzein iSTD	[M-H]-		257.076	2.879	40191404		49511280		49089664		55855744		49270316		53091988		46206248		49531144		45817900		50521744		48066604		48541164		99239136	81533664	22737582	8771558
1.76_183.08	1_D5-Hippuric acid-d5 iSTD	[M-H]-		183.082	1.762	33286006		38977108		36934012		53210708		40584620		38834864		32675936		35107392		31555098		31410610		32642798		27987606		98828800	113372352	21201568	10141057
1.99_378.20	1_Val-Tyr-Val iSTD	[M-H]-		378.203	1.991	3325129		3910764		3447692		4731918		3550127		4150856		3572125		3639104		2639470		2608691		2798427		2253971		11266264	12820903	1912030	1060484
