# Supplementary material for: Unveiling the “hidden quality” of the walnut pellicle: a precious source of bioactive lipids
Source: Front Plant Sci. 2024 Jun 18;15:1395543. doi: 10.3389/fpls.2024.1395543 (PMC11217525; doi:10.3389/fpls.2024.1395543)
Supplement: Supplementary Table 3 — Raw data of the untargeted metabolomic profile from the analytical Platform 3. [file Table_3.xlsx]

## Sheet: Data Platform 3
							file id			220926cEGsa03_1	220926cEGsa04_1	220926cEGsa06_1	220926cEGsa08_1	220926cEGsa12_1	220926cEGsa14_1	220926cEGsa15_1	220926cEGsa18_1	220926cEGsa21_1	220926cEGsa22_1	220926cEGsa23_1	220926cEGsa24_1	220926cEGsa25_1	220926cEGsa26_1	220926cEGsa27_1
							mx class			686352	686352	686352	686352	686352	686352	686352	686352	686352	686352	686352	686352	692564	692564	692564
							mx sample			220926cEGsa03_1	220926cEGsa04_1	220926cEGsa06_1	220926cEGsa08_1	220926cEGsa12_1	220926cEGsa14_1	220926cEGsa15_1	220926cEGsa18_1	220926cEGsa21_1	220926cEGsa22_1	220926cEGsa23_1	220926cEGsa24_1	220926cEGsa25_1	220926cEGsa26_1	220926cEGsa27_1
							label			T2_N_L_009	T2_W_L_015	T2_E_L_011	T3_S_L_021	T1_N_L_001	T1_E_L_003	T1_S_L_005	T2_S_L_013	T3_E_L_019	T3_N_L_017	T1_W_L_007	T3_W_L_023	pool_001	pool_002	pool_003
							comment			T2_N_L	T2_W_L	T2_E_L	T3_S_L	T1_N_L	T1_E_L	T1_S_L	T2_S_L	T3_E_L	T3_N_L	T1_W_L	T3_W_L	pool_001	pool_002	pool_003
							species			Juglans regia	Juglans regia	Juglans regia	Juglans regia	Juglans regia	Juglans regia	Juglans regia	Juglans regia	Juglans regia	Juglans regia	Juglans regia	Juglans regia	English walnut	English walnut	English walnut
							organ			Pellicle	Pellicle	Pellicle	Pellicle	Pellicle	Pellicle	Pellicle	Pellicle	Pellicle	Pellicle	Pellicle	Pellicle	seed coat	seed coat	seed coat
							treatment			Light Colored Seed Coat - Light Colored Seed Coat	Light Colored Seed Coat - Light Colored Seed Coat	Light Colored Seed Coat - Light Colored Seed Coat	Light Colored Seed Coat - Light Colored Seed Coat	Light Colored Seed Coat - Light Colored Seed Coat	Light Colored Seed Coat - Light Colored Seed Coat	Light Colored Seed Coat - Light Colored Seed Coat	Light Colored Seed Coat - Light Colored Seed Coat	Light Colored Seed Coat - Light Colored Seed Coat	Light Colored Seed Coat - Light Colored Seed Coat	Light Colored Seed Coat - Light Colored Seed Coat	Light Colored Seed Coat - Light Colored Seed Coat	pool - pool	pool - pool	pool - pool
BinBase name	ret.index	quant mz	BB id	mass spec	PubChem	KEGG	InChI Key
xylulose	553450	173	31632	85:1861.0 86:702.0 87:1148.0 88:324.0 89:10095.0 90:1041.0 91:452.0 94:60.0 95:96.0 96:155.0 97:114.0 98:195.0 99:528.0 100:1225.0 101:2618.0 102:774.0 103:9082.0 104:930.0 106:381.0 108:16.0 109:127.0 110:14.0 111:327.0 112:10.0 113:567.0 114:3170.0 115:1092.0 116:1102.0 117:15978.0 118:1867.0 119:1700.0 120:3.0 125:55.0 126:826.0 128:264.0 129:1798.0 130:91.0 131:1527.0 132:491.0 133:5046.0 134…	439205	C00312	LQXVFWRQNMEDEE-PYHARJCCSA-N			3559	5305	3781	7037	2720	5291	4198	2164	4163	4896	3140	6431	5521	6222	7012
xylose	543267	103	169	86:77.0 87:118.0 89:838.0 90:80.0 91:46.0 94:19.0 96:63.0 98:48.0 99:37.0 100:186.0 101:192.0 102:469.0 103:7719.0 104:659.0 105:379.0 106:26.0 112:23.0 114:254.0 115:75.0 117:652.0 118:60.0 119:80.0 120:23.0 121:17.0 124:30.0 127:70.0 128:49.0 129:515.0 130:102.0 131:344.0 133:894.0 134:104.0 135:66.0 137:49.0 142:48.0 143:43.0 144:51.0 145:65.0 147:2699.0 148:283.0 149:250.0 151:31.0 155:21.0 1…	135191	C00181	SRBFZHDQGSBBOR-IOVATXLUSA-N			962250	1685635	1279148	1746596	1160961	1361605	763270	1341059	1408365	1321172	550643	1701222	2152089	2154850	2238286
xylitol	567437	217	5857	85:22.0 87:53.0 88:95.0 89:312.0 94:15.0 99:38.0 101:376.0 103:3875.0 104:345.0 105:78.0 107:25.0 108:24.0 110:68.0 113:18.0 115:63.0 116:117.0 117:1418.0 118:103.0 119:73.0 129:1604.0 130:163.0 131:367.0 132:26.0 133:712.0 135:29.0 142:33.0 143:88.0 147:3295.0 148:560.0 149:319.0 155:12.0 157:214.0 159:20.0 163:58.0 169:22.0 171:40.0 175:99.0 182:58.0 189:476.0 190:74.0 191:333.0 192:19.0 193:15…	6912	C00379	HEBKCHPVOIAQTA-NGQZWQHPSA-N			6326	7972	1632	15406	9306	10077	6377	6243	13899	12196	576	17183	17966	25283	25397
xanthine	701688	353	1669	85:2517.0 86:3710.0 87:2079.0 88:382.0 89:398.0 90:80.0 91:121.0 92:294.0 93:389.0 94:217.0 95:887.0 96:502.0 97:447.0 98:2556.0 99:3280.0 100:20394.0 101:2912.0 102:1806.0 103:2337.0 104:350.0 105:1446.0 106:113.0 107:15.0 108:151.0 109:225.0 110:796.0 111:2460.0 112:928.0 113:1375.0 114:1007.0 115:2460.0 116:1524.0 117:4430.0 118:716.0 119:955.0 120:203.0 121:149.0 122:214.0 123:385.0 124:753.0…	1188	C00385	LRFVTYWOQMYALW-UHFFFAOYSA-N			1644	1178	1101	1046	1158	736	426	675	492	568	334	846	957	547	487
vanillic acid	597845	297	16595	85:131.0 89:849.0 90:76.0 91:619.0 92:175.0 93:132.0 95:115.0 98:479.0 99:51.0 102:88.0 103:1501.0 104:166.0 105:538.0 106:42.0 107:324.0 109:223.0 110:100.0 111:1.0 112:7.0 113:5.0 117:953.0 119:173.0 120:75.0 121:296.0 122:117.0 123:121.0 125:7.0 126:1381.0 127:5.0 129:256.0 131:24.0 133:502.0 135:374.0 137:601.0 138:84.0 139:31.0 141:299.0 143:39.0 147:1397.0 148:616.0 149:333.0 150:109.0 151:…	8468	C06672	WKOLLVMJNQIZCI-UHFFFAOYSA-N			9525	14958	12616	17640	11235	16638	11055	14586	19894	15248	8838	29987	9437	9630	9451
valine	239426	156	585	85:1256.0 86:1369.0 87:2965.0 88:512.0 89:370.0 91:1184.0 100:568.0 101:201.0 102:1338.0 103:4662.0 104:197.0 105:274.0 109:39.0 112:180.0 113:675.0 115:160.0 117:295.0 118:385.0 126:74.0 128:2220.0 129:580.0 130:4523.0 131:1353.0 132:462.0 138:59.0 142:37.0 144:75.0 146:5600.0 147:1520.0 148:729.0 149:446.0 151:192.0 152:157.0 153:40.0 156:3536.0 157:617.0 158:341.0 170:15.0 174:1874.0 175:308.0…	6287	C00183	KZSNJWFQEVHDMF-BYPYZUCNSA-N			8806	9231	19102	17492	37026	17068	6037	8607	18591	7469	12705	10404	9871	8469	19866
uric acid	725308	456	34037	85:6664.0 86:11996.0 87:5994.0 88:1848.0 89:1752.0 90:98.0 91:184.0 92:413.0 93:530.0 94:323.0 95:735.0 96:783.0 97:1154.0 98:7037.0 99:8519.0 100:75144.0 101:9631.0 102:5689.0 103:4396.0 104:815.0 105:2695.0 106:649.0 107:430.0 108:286.0 109:497.0 110:1719.0 111:4576.0 112:1645.0 113:4054.0 114:4768.0 115:7190.0 116:4061.0 117:12072.0 118:2045.0 119:2654.0 120:543.0 121:341.0 122:312.0 123:504.0…	1175	C00366	LEHOTFFKMJEONL-UHFFFAOYSA-N			435	769	867	1272	898	1256	879	1487	602	1590	751	1670	909	990	1083
urea	326574	189	3256	85:859.0 86:1343.0 87:2349.0 88:432.0 90:43.0 91:99.0 92:36.0 98:133.0 99:5452.0 100:6216.0 101:1289.0 102:803.0 103:149.0 107:195.0 110:309.0 111:554.0 113:326.0 114:765.0 115:629.0 116:182.0 117:375.0 118:388.0 126:44.0 127:542.0 129:155.0 130:2178.0 131:1631.0 132:1249.0 133:328.0 134:319.0 136:55.0 137:40.0 138:7.0 139:106.0 140:86.0 141:220.0 143:208.0 144:172.0 146:1945.0 147:24448.0 148:42…	1176	C00086	XSQUKJJJFZCRTK-UHFFFAOYSA-N			11552	15384	13324	17087	13187	20484	8491	14824	15516	13454	10620	17056	12513	13270	12326
UDP-N-acetylglucosamine	623789	226	2546	85:264.0 88:32.0 89:406.0 92:59.0 99:105.0 100:164.0 101:582.0 102:92.0 103:1202.0 106:18.0 108:44.0 110:219.0 111:74.0 112:32.0 113:250.0 114:282.0 115:146.0 116:5547.0 117:2430.0 118:296.0 120:15.0 124:26.0 125:13.0 127:94.0 128:278.0 129:910.0 130:196.0 131:407.0 132:326.0 133:847.0 136:3.0 137:68.0 139:19.0 140:90.0 141:128.0 143:321.0 144:6.0 146:74.0 147:2388.0 148:173.0 149:445.0 150:61.0 …	445675	C00043	LFTYTUAZOPRMMI-CFRASDGPSA-N			897	1134	918	1207	899	883	593	1106	948	1137	710	1373	733	661	875
UDP-glucuronic acid	585473	217	21705	85:836.0 86:140.0 89:1123.0 90:104.0 91:79.0 93:59.0 95:150.0 97:257.0 98:49.0 99:769.0 100:56.0 101:10488.0 102:871.0 103:3819.0 104:238.0 105:458.0 107:72.0 108:6.0 109:366.0 111:1096.0 112:28.0 113:631.0 114:58.0 115:828.0 116:9417.0 117:6717.0 118:797.0 119:682.0 120:43.0 121:42.0 122:1.0 123:812.0 124:139.0 125:97.0 126:23.0 127:433.0 129:8544.0 130:854.0 131:1568.0 132:223.0 133:3913.0 134:…	17473	C00167	HDYANYHVCAPMJV-LXQIFKJMSA-N			58320	80798	70039	71656	66627	63777	80968	65444	53449	58858	59828	70347	30968	23920	27319
tyrosol	510842	179	100888	85:805.0 86:240.0 87:781.0 88:1255.0 89:4759.0 92:585.0 94:111.0 100:69.0 102:2214.0 103:25928.0 104:3146.0 105:2603.0 106:474.0 107:744.0 108:34.0 109:532.0 111:360.0 116:1577.0 120:338.0 121:1138.0 122:218.0 123:179.0 125:94.0 126:2814.0 127:854.0 128:293.0 129:502.0 132:34.0 133:1181.0 135:2996.0 138:71.0 139:53.0 140:51.0 142:66.0 149:3188.0 150:697.0 151:2875.0 152:338.0 153:209.0 155:10.0 1…	10393	C06044	YCCILVSKPBXVIP-UHFFFAOYSA-N			9226	18760	14454	16994	15223	14496	8288	16063	14644	6313	6438	16401	6930	5999	6549
tyrosine	671252	218	16	85:101.0 86:1059.0 87:458.0 89:659.0 90:823.0 91:1849.0 92:215.0 93:210.0 94:46.0 95:258.0 97:226.0 100:19804.0 101:2641.0 102:1366.0 103:1633.0 104:401.0 105:1066.0 107:424.0 113:79.0 115:546.0 116:116.0 117:900.0 118:715.0 119:703.0 120:181.0 121:365.0 123:63.0 124:32.0 125:60.0 128:317.0 129:136.0 130:2787.0 131:1381.0 132:2378.0 133:2406.0 135:1073.0 136:172.0 137:139.0 138:33.0 143:94.0 144:…	6057	C00082	OUYCCCASQSFEME-QMMMGPOBSA-N			13317	6292	4320	4555	4103	6211	5517	2924	2591	15401	1758	4204	4187	3144	3301
trisaccharide	1027144	361	3234	85:137.0 87:25.0 89:192.0 96:127.0 99:152.0 101:323.0 102:32.0 103:3443.0 104:258.0 105:198.0 109:157.0 111:87.0 113:135.0 115:43.0 116:28.0 117:1421.0 118:135.0 119:230.0 122:45.0 123:1.0 129:3068.0 130:273.0 131:650.0 132:96.0 133:834.0 134:61.0 135:154.0 136:39.0 139:56.0 141:4.0 142:19.0 143:444.0 145:66.0 147:3860.0 148:556.0 149:571.0 150:62.0 151:42.0 153:79.0 155:384.0 156:64.0 157:601.0 …	871	C00420	FYGDTMLNYKFZSV-UHFFFAOYSA-N			7800	13051	8734	6419	7527	5542	9428	11279	7379	7991	5009	9570	4517	3812	4248
trehalose	948197	191	111823	85:94.0 98:34.0 99:34.0 103:3530.0 104:205.0 109:159.0 111:125.0 113:165.0 116:172.0 117:768.0 118:42.0 119:60.0 120:25.0 129:2648.0 130:212.0 131:480.0 132:80.0 133:615.0 135:78.0 139:73.0 140:35.0 147:3851.0 148:529.0 149:300.0 150:65.0 151:32.0 154:24.0 155:298.0 157:181.0 169:1745.0 170:122.0 171:166.0 173:76.0 174:14.0 177:56.0 181:35.0 189:344.0 190:84.0 191:3330.0 192:394.0 193:183.0 199:3…	7427	C01083	HDTRYLNUVZCQOY-LIZSDCNHSA-N			9841	11434	12494	12627	11265	8688	7380	13093	11247	11201	6185	11564	1108	8106	8186
tocopherol gamma-	1026121	223	4545	85:7.0 86:92.0 88:26.0 91:52.0 94:33.0 95:97.0 97:79.0 99:8.0 104:48.0 105:82.0 107:5.0 109:87.0 111:9.0 112:41.0 119:199.0 120:6.0 121:33.0 123:9.0 124:39.0 125:5.0 128:3.0 134:117.0 135:2.0 137:39.0 139:30.0 140:62.0 142:25.0 145:87.0 147:25.0 148:47.0 149:122.0 151:89.0 152:36.0 156:203.0 157:48.0 161:33.0 163:63.0 164:25.0 165:36.0 166:24.0 167:21.0 171:4.0 172:8.0 173:43.0 174:147.0 175:27.0…	92729	C02483	QUEDXNHFTDJVIY-DQCZWYHMSA-N			156103	55420	86729	79876	77956	100713	55824	65410	74822	65188	80821	52515	65005	61697	57046
tocopherol delta-	997765	208	105385	85:45.0 87:79.0 90:67.0 91:816.0 93:148.0 95:320.0 97:560.0 98:80.0 102:47.0 105:364.0 107:175.0 108:92.0 109:305.0 111:200.0 115:140.0 116:110.0 117:258.0 118:63.0 119:135.0 120:77.0 121:212.0 123:148.0 128:77.0 131:335.0 132:57.0 134:84.0 135:258.0 136:43.0 137:226.0 140:24.0 141:83.0 144:82.0 145:135.0 146:54.0 147:394.0 149:309.0 151:240.0 152:62.0 159:67.0 161:169.0 163:177.0 164:44.0 165:55…	92094	C14151	GZIFEOYASATJEH-VHFRWLAGSA-N			17715	20812	20574	27836	17487	23064	10699	9787	23393	22850	15745	19571	18090	16174	2466
tocopherol beta	1022815	223	42194	85:68.0 93:9.0 95:72.0 97:57.0 101:38.0 107:36.0 111:19.0 123:55.0 127:63.0 129:202.0 130:38.0 136:55.0 142:24.0 143:39.0 145:98.0 152:6.0 153:2.0 155:35.0 159:62.0 164:8.0 165:77.0 166:38.0 167:38.0 175:69.0 176:70.0 177:140.0 179:134.0 180:79.0 181:32.0 183:18.0 186:9.0 188:18.0 189:66.0 192:33.0 193:427.0 194:381.0 195:216.0 196:45.0 198:15.0 203:20.0 204:10.0 205:59.0 206:20.0 207:797.0 208:3…	8989	C14152	WGVKWNUPNGFDFJ-CBIUGAAKSA-N			5303	7457	6247	2958	6777	6387	4152	6318	2510	6145	2304	1323	6047	5200	5558
tocopherol alpha-	1067809	237	100	85:207.0 87:84.0 88:72.0 91:780.0 92:83.0 93:140.0 94:40.0 95:435.0 97:218.0 99:100.0 103:358.0 105:440.0 106:76.0 107:223.0 108:54.0 109:243.0 110:64.0 111:199.0 112:52.0 113:56.0 115:104.0 116:123.0 117:293.0 119:705.0 120:82.0 121:197.0 129:158.0 131:400.0 134:108.0 135:351.0 136:189.0 141:89.0 145:154.0 147:430.0 149:213.0 159:143.0 161:190.0 162:65.0 163:233.0 164:77.0 174:64.0 175:152.0 177…	14985	C02477	NCYCYZXNIZJOKI-OVSJKPMPSA-N			30953	13448	33514	16226	11436	21323	20100	27412	33349	41569	6187	28984	10902	12238	9198
thymidine	349402	170	87703	85:2128.0 86:315.0 87:993.0 88:296.0 89:761.0 90:170.0 91:199.0 93:88.0 94:143.0 95:637.0 96:198.0 97:555.0 98:401.0 99:2720.0 100:964.0 101:6820.0 102:681.0 103:10367.0 104:790.0 105:668.0 109:307.0 111:3809.0 112:435.0 113:4473.0 114:564.0 115:1105.0 116:667.0 117:787.0 118:65.0 119:288.0 124:34.0 125:1815.0 126:288.0 127:3843.0 128:439.0 129:3217.0 130:471.0 131:1443.0 132:211.0 133:2376.0 134…	5789	C00214	IQFYYKKMVGJFEH-XLPZGREQSA-N			1511	2097	1499	2037	2266	2433	919	1328	1503	1312	1103	1871	2386	2426	2242
threonic acid	497572	292	172	86:78.0 87:500.0 88:136.0 89:1131.0 90:139.0 91:82.0 95:22.0 98:80.0 99:146.0 101:890.0 102:4177.0 103:5003.0 104:619.0 105:374.0 111:46.0 112:15.0 113:201.0 115:359.0 116:115.0 117:5872.0 118:496.0 119:430.0 121:39.0 128:64.0 129:1372.0 130:3055.0 131:1659.0 132:232.0 133:2893.0 134:460.0 135:237.0 136:30.0 141:29.0 143:619.0 144:80.0 145:104.0 147:16627.0 148:2848.0 149:2024.0 152:34.0 157:244.…	5460407	C01620	JPIJQSOTBSSVTP-STHAYSLISA-N			2959	5727	5275	4002	3837	4127	4438	3803	4039	3344	3242	5185	5861	5973	4944
threitol	467595	217	770	85:123.0 86:39.0 87:235.0 88:92.0 89:794.0 91:41.0 92:65.0 93:48.0 94:22.0 97:38.0 101:1040.0 102:87.0 103:5119.0 104:409.0 105:302.0 106:38.0 112:26.0 113:47.0 114:17.0 115:225.0 116:875.0 117:3651.0 118:353.0 119:290.0 129:736.0 131:620.0 132:62.0 133:1389.0 134:137.0 135:41.0 143:141.0 145:31.0 147:6122.0 148:886.0 149:553.0 151:42.0 165:22.0 175:40.0 189:971.0 190:191.0 191:521.0 192:94.0 193…	169019	C16884	UNXHWFMMPAWVPI-QWWZWVQMSA-N			18254	23295	17757	21989	20638	15043	18882	16379	16917	14449	8359	20366	16276	14430	1808
terephthalic acid	611213	295	344959	85:662.0 89:3774.0 90:439.0 91:747.0 92:285.0 96:222.0 99:709.0 102:177.0 103:12753.0 104:6766.0 105:1475.0 107:346.0 110:216.0 116:1514.0 117:3103.0 118:416.0 119:996.0 120:207.0 121:437.0 126:704.0 131:855.0 133:2545.0 134:1357.0 135:3325.0 136:364.0 140:2220.0 147:6433.0 148:1467.0 149:1155.0 150:325.0 151:319.0 157:291.0 158:646.0 160:1385.0 161:104.0 163:462.0 164:102.0 173:110.0 176:85.0 17…	22416364	C06337	KKEYFWRCBNTPAC-UHFFFAOYSA-N			10850	9690	7684	7613	3153	4232	2204	2596	4039	3592	2365	4570	4534	3154	211
tartaric acid	534291	292	33985	85:786.0 86:260.0 87:1086.0 88:349.0 89:901.0 92:63.0 93:424.0 94:1.0 95:68.0 99:1482.0 100:1220.0 101:976.0 102:12165.0 103:4411.0 104:950.0 105:569.0 106:327.0 108:144.0 109:72.0 110:289.0 111:252.0 112:49.0 113:1630.0 114:165.0 115:50.0 116:707.0 117:1725.0 118:257.0 119:1109.0 120:248.0 121:94.0 122:2.0 123:2.0 124:107.0 125:18.0 126:158.0 127:408.0 129:76.0 130:6556.0 131:6451.0 132:1626.0 1…	444305	C00898	FEWJPZIEWOKRBE-JCYAYHJZSA-N			2072	2525	1876	1394	2051	2202	1605	2414	713	1545	988	1735	1799	2381	2357
tagatose	631459	307	4833	85:334.0 87:230.0 88:1.0 89:7139.0 90:557.0 91:209.0 93:158.0 94:346.0 95:551.0 97:266.0 98:203.0 101:1898.0 103:15541.0 104:727.0 105:95.0 107:220.0 109:94.0 110:214.0 111:84.0 112:53.0 113:178.0 117:2074.0 118:87.0 120:300.0 121:119.0 123:192.0 124:85.0 125:12.0 126:15.0 128:153.0 129:1803.0 131:160.0 137:1.0 138:19.0 140:1895.0 141:1398.0 142:289.0 143:129.0 144:1676.0 145:382.0 147:616.0 150:…	439312	C00795	LKDRXBCSQODPBY-OEXCPVAWSA-N			1211	786	787	1623	855	892	565	1156	1068	1089	788	1164	575	1006	1105
syringic acid	653381	179	17339	85:32.0 86:79.0 89:154.0 91:278.0 95:11.0 98:41.0 108:54.0 109:56.0 110:4.0 113:77.0 115:20.0 119:204.0 120:15.0 121:51.0 130:59.0 132:532.0 133:133.0 137:141.0 139:4.0 141:430.0 142:149.0 147:590.0 150:97.0 151:96.0 153:2.0 154:18.0 156:101.0 158:4.0 163:68.0 165:44.0 167:77.0 168:3.0 169:2.0 174:2.0 179:3949.0 180:499.0 181:142.0 182:24.0 184:38.0 191:2.0 193:187.0 195:169.0 197:15.0 204:126.0 …	10742	C10833	JMSVCTWVEWCHDZ-UHFFFAOYSA-N			7392	3101	6555	7390	7158	7198	4849	4332	2250	1714	2432	6316	5157	2878	3212
sucrose	915139	271	173	85:319.0 87:314.0 88:197.0 89:406.0 91:85.0 92:24.0 94:41.0 97:89.0 99:203.0 100:65.0 101:688.0 102:331.0 103:8357.0 104:731.0 105:421.0 108:21.0 109:428.0 110:53.0 111:276.0 112:52.0 113:277.0 114:83.0 115:331.0 116:305.0 117:1934.0 118:199.0 119:119.0 122:42.0 124:17.0 125:110.0 127:383.0 128:152.0 129:5742.0 130:735.0 131:1008.0 132:97.0 133:1861.0 134:253.0 135:207.0 136:48.0 138:21.0 139:138…	5988	C00089	CZMRCDWAGMRECN-UGDNZRGBSA-N			1011944	38274	498946	133926	576377	528679	477065	320487	74473	183937	1125420	104013	286829	263066	252613
succinic acid	370737	247	34190	89:357.0 111:225.0 121:116.0 126:317.0 127:100.0 129:11706.0 143:252.0 145:593.0 155:173.0 162:117.0 172:3269.0 174:384.0 186:1952.0 187:295.0 203:150.0 217:265.0 218:1285.0 219:340.0 220:69.0 230:1.0 231:143.0 232:2.0 234:1.0 245:177.0 247:14970.0 248:3823.0 249:1618.0 250:344.0 251:59.0 252:17.0 253:4.0 254:5.0 255:1.0 256:9.0 257:55.0 258:4.0 259:43.0 260:78.0 262:556.0 263:137.0 264:27.0 265:…	1110	C00042	KDYFGRWQOYBRFD-UHFFFAOYSA-N			1643	1566	1589	1424	1784	1501	1397	2005	1628	752	1004	1609	1727	1923	1731
sorbitol	667922	217	162	85:588.0 86:704.0 88:1768.0 89:8743.0 90:652.0 91:1094.0 92:168.0 93:127.0 94:89.0 97:2807.0 98:1048.0 99:1610.0 100:506.0 101:5089.0 102:848.0 103:48732.0 104:4923.0 105:2703.0 106:215.0 109:509.0 110:185.0 111:1108.0 112:146.0 113:1262.0 114:181.0 115:2342.0 116:957.0 117:28648.0 118:2694.0 119:2266.0 120:260.0 121:427.0 123:238.0 124:184.0 125:365.0 126:341.0 127:1107.0 129:20376.0 130:3176.0 …	5780	C00794	FBPFZTCFMRRESA-JGWLITMVSA-N			12691	36613	34149	12855	34921	33338	108955	45881	34425	24139	5794	22297	26934	23281	24773
sinigrin	805633	361	117193	85:34.0 86:107.0 87:381.0 88:246.0 89:844.0 90:22.0 91:26.0 93:35.0 94:27.0 96:61.0 97:58.0 98:131.0 99:254.0 100:3249.0 101:1126.0 102:435.0 103:3829.0 104:395.0 105:278.0 106:51.0 109:250.0 110:37.0 111:144.0 113:215.0 114:978.0 115:1404.0 116:1409.0 117:1962.0 119:103.0 121:63.0 122:12.0 124:38.0 125:25.0 129:3475.0 130:759.0 131:1445.0 132:647.0 133:1418.0 134:100.0 135:212.0 136:63.0 139:91.…	23682211		QKFAFSGJTMHRRY-OCFLFPRFSA-M			1464	1111	1660	963	1303	960	750	966	1576	1353	698	1918	616	630	664
sinapinic acid	788416	338	3181	85:149.0 86:82.0 88:11.0 89:1714.0 90:180.0 91:795.0 92:279.0 95:109.0 96:25.0 97:76.0 98:125.0 99:254.0 100:79.0 102:188.0 103:397.0 104:203.0 105:264.0 106:126.0 108:57.0 109:148.0 111:161.0 113:90.0 114:48.0 115:608.0 116:321.0 117:1024.0 118:36.0 119:866.0 120:415.0 121:184.0 122:33.0 124:61.0 128:148.0 130:314.0 131:511.0 132:760.0 133:614.0 134:157.0 135:828.0 136:157.0 137:119.0 138:20.0 1…	637775	C00482	PCMORTLOPMLEFB-ONEGZZNKSA-N			2121	3149	2391	3349	2770	2415	1808	2672	2785	2425	1299	2988	2044	1690	1912
shikimic acid	611100	204	286	85:149.0 87:51.0 89:152.0 90:30.0 91:290.0 92:189.0 93:498.0 94:99.0 95:323.0 96:150.0 97:191.0 98:58.0 99:248.0 100:45.0 101:676.0 103:796.0 104:122.0 105:435.0 107:157.0 108:97.0 109:114.0 111:293.0 112:57.0 113:62.0 114:60.0 115:150.0 116:435.0 117:504.0 118:76.0 119:240.0 121:261.0 122:62.0 123:242.0 125:205.0 126:81.0 128:58.0 131:777.0 132:71.0 133:2652.0 134:351.0 135:280.0 137:3.0 138:27.…	8742	C00493	JXOHGGNKMLTUBP-HSUXUTPPSA-N			3069	22239	19546	23597	19417	20718	17201	21910	41289	25507	14092	26356	18991	17299	18507
serotonin	877364	174	289	86:1575.0 87:129.0 100:692.0 101:93.0 102:165.0 104:20.0 114:24.0 115:88.0 116:53.0 117:164.0 128:56.0 130:151.0 131:121.0 146:256.0 148:98.0 158:30.0 170:19.0 172:56.0 174:3831.0 175:650.0 176:229.0 188:109.0 189:33.0 202:53.0 204:36.0 218:139.0 232:32.0 265:15.0 289:30.0 314:17.0 362:15.0 377:63.0 399:13.0 427:14.0 469:13.0 471:19.0	5202	C00780	QZAYGJVTTNCVMB-UHFFFAOYSA-N			111517	123660	145095	207110	140478	195301	97933	148099	160689	87511	42890	112446	219691	233525	236929
saccharic acid	699211	333	11214	85:376.0 86:223.0 87:56.0 89:377.0 90:30.0 91:59.0 93:137.0 94:112.0 95:140.0 99:663.0 100:177.0 101:426.0 102:1251.0 103:1710.0 104:173.0 105:104.0 106:11.0 108:89.0 110:106.0 111:181.0 112:63.0 113:312.0 114:10.0 115:253.0 116:35.0 117:1458.0 118:146.0 119:195.0 121:344.0 123:7.0 124:91.0 127:309.0 129:1394.0 130:600.0 131:1538.0 132:485.0 133:2043.0 134:499.0 135:122.0 138:17.0 139:23.0 140:81…	33037	C00818	DSLZVSRJTYRBFB-LLEIAEIESA-N			19409	2930	22846	18926	15785	13753	13070	33137	22290	22632	4798	28402	26674	28681	28430
ribulose	551054	173	210249	85:2824.0 86:1483.0 87:1921.0 88:764.0 89:20531.0 90:1270.0 91:812.0 92:107.0 94:187.0 97:222.0 98:252.0 99:356.0 100:1572.0 101:4878.0 102:1754.0 103:21017.0 104:2229.0 105:2491.0 106:94.0 112:25.0 113:407.0 114:11170.0 115:2870.0 116:2216.0 117:26698.0 118:3080.0 119:2826.0 120:123.0 121:144.0 126:1300.0 127:376.0 128:448.0 129:2716.0 130:1520.0 131:2687.0 132:857.0 133:8529.0 134:1562.0 135:10…	151261		ZAQJHHRNXZUBTE-NQXXGFSBSA-N			3634	5305	4013	4645	3434	5291	5093	2351	4691	5027	516	6431	1878	6339	7012
ribose	553135	217	1662	85:8071.0 86:9472.0 87:11706.0 88:7002.0 89:91105.0 90:8121.0 91:4369.0 92:716.0 93:150.0 94:1908.0 95:1008.0 96:977.0 97:1171.0 98:3992.0 99:8420.0 100:38767.0 101:35431.0 102:21246.0 103:1062555.0 104:101843.0 105:73545.0 106:4592.0 107:540.0 108:433.0 109:560.0 110:342.0 111:3649.0 112:4750.0 113:10117.0 114:23592.0 115:17668.0 116:13805.0 117:109230.0 118:11975.0 119:17425.0 120:1771.0 121:10…	5779	C00121	HMFHBZSHGGEWLO-SOOFDHNKSA-N			7848	23874	19631	14061	19232	20911	22693	21017	20140	20430	11621	24691	11158	11078	20817
ribonic acid	597646	292	84543	86:34.0 87:189.0 88:350.0 89:1206.0 93:89.0 97:163.0 99:271.0 101:1055.0 102:1149.0 103:14449.0 104:1343.0 105:510.0 111:142.0 113:391.0 114:65.0 115:244.0 116:292.0 117:4183.0 118:357.0 119:78.0 125:85.0 129:1808.0 130:1437.0 131:1358.0 132:316.0 133:4108.0 134:646.0 135:379.0 141:281.0 142:49.0 143:1809.0 144:219.0 145:92.0 147:15767.0 148:2552.0 149:1820.0 150:145.0 151:61.0 157:484.0 159:32.0…	5460677	C01685	QXKAIJAYHKCRRA-BXXZVTAOSA-N			2166	2692	2526	4318	2226	3113	1115	2989	4091	4055	1485	4078	3687	4129	3226
raffinose	1120886	361	3190	85:33.0 86:57.0 89:118.0 97:9.0 99:119.0 101:141.0 103:2918.0 104:200.0 109:167.0 113:29.0 115:39.0 116:161.0 117:590.0 119:118.0 127:20.0 129:3784.0 130:442.0 131:389.0 132:40.0 133:755.0 139:34.0 141:95.0 142:74.0 143:448.0 144:16.0 145:42.0 147:2732.0 148:202.0 149:232.0 150:2.0 153:60.0 155:407.0 156:35.0 157:463.0 158:48.0 159:18.0 161:17.0 162:10.0 163:129.0 169:2550.0 170:335.0 171:169.0 1…	439242	C00492	MUPFEKGTMRGPLJ-ZQSKZDJDSA-N			180080	22581	76466	30022	68788	112563	79601	36594	14536	26997	160829	30760	45334	36356	35718
quinic acid	634900	345	4523	87:107.0 91:114.0 92:3.0 93:26.0 99:91.0 100:4.0 106:51.0 108:3.0 112:77.0 115:536.0 119:77.0 120:17.0 121:29.0 123:21.0 124:12.0 125:18.0 126:140.0 127:330.0 130:94.0 131:533.0 132:2.0 133:745.0 134:431.0 136:13.0 137:5.0 138:6.0 139:136.0 141:559.0 143:468.0 147:4537.0 148:790.0 149:692.0 150:49.0 151:189.0 154:24.0 157:65.0 158:6.0 161:36.0 165:9.0 167:239.0 168:114.0 169:34.0 176:73.0 181:98.…	6508	C00296	AAWZDTNXLSGCEK-LNVDRNJUSA-N			2907	2507	2516	2329	3581	4111	2632	3612	2050	2451	1682	3052	5995	5683	5757
pyrogallol	494429	239	388180	89:301.0 90:56.0 91:629.0 92:145.0 93:1216.0 95:273.0 103:457.0 104:103.0 105:251.0 106:114.0 107:137.0 108:122.0 109:282.0 111:300.0 119:870.0 122:29.0 123:164.0 125:69.0 131:268.0 133:3221.0 134:471.0 135:319.0 136:34.0 137:308.0 145:46.0 147:496.0 149:216.0 151:98.0 152:31.0 153:149.0 157:212.0 158:70.0 162:8.0 163:61.0 164:42.0 165:57.0 167:117.0 169:81.0 170:36.0 177:29.0 178:15.0 179:376.0 …	1057	C01108	WQGWDDDVZFFDIG-UHFFFAOYSA-N			77133	97163	71414	74036	100002	91504	44199	74787	62766	51637	35311	59051	88903	71759	70254
pyridoxine	653546	280	171823	86:77.0 87:84.0 88:63.0 93:204.0 94:85.0 97:33.0 103:49.0 106:174.0 107:110.0 109:59.0 113:48.0 116:19.0 118:127.0 119:128.0 120:21.0 122:63.0 123:13.0 130:183.0 132:174.0 133:302.0 134:209.0 135:202.0 137:85.0 138:20.0 147:1263.0 148:644.0 149:592.0 150:102.0 154:7.0 162:73.0 163:93.0 164:122.0 166:101.0 171:18.0 176:89.0 178:106.0 180:207.0 181:99.0 190:7.0 193:66.0 194:33.0 196:8.0 197:27.0 20…	1054	C00314	LXNHXLLTXMVWPM-UHFFFAOYSA-N			8708	8025	11737	11348	6002	11939	7622	11739	10232	11841	4665	12286	7868	7005	6644
putrescine	588119	174	21703	85:624.0 86:17614.0 87:1954.0 88:701.0 95:37.0 96:1.0 97:93.0 98:646.0 99:2310.0 100:8640.0 101:1171.0 102:973.0 103:9.0 110:382.0 111:26.0 112:811.0 113:463.0 114:1772.0 115:664.0 116:1599.0 117:894.0 118:197.0 124:16.0 125:39.0 126:2092.0 127:226.0 128:1088.0 129:243.0 130:4521.0 131:1582.0 132:862.0 140:655.0 141:77.0 142:1872.0 143:265.0 144:500.0 145:66.0 146:2422.0 153:32.0 156:175.0 158:65…	1045	C00138	KIDHWZJUCRJVML-UHFFFAOYSA-N			53794	32404	109883	29066	48939	42406	33507	57070	92301	12543	40877	28180	44646	42564	43329
prunin	985201	332	418765	85:2429.0 87:911.0 88:931.0 90:436.0 96:307.0 97:480.0 98:511.0 99:1328.0 100:635.0 102:978.0 103:19815.0 104:2583.0 105:1533.0 109:1602.0 110:227.0 111:1681.0 113:1927.0 114:331.0 115:791.0 116:3475.0 117:15269.0 118:1822.0 119:1825.0 123:352.0 125:519.0 126:384.0 127:1394.0 128:689.0 129:19450.0 130:1080.0 131:3381.0 132:634.0 133:6809.0 135:1008.0 141:1890.0 142:1366.0 143:4538.0 146:345.0 147…	92794	C09099	DLIKSSGEMUFQOK-SFTVRKLSSA-N			11374	11996	11915	13544	10436	10011	7451	12384	11449	11096	5719	12512	7959	6683	7447
propyleneglycol	177885	117	360579	87:604.0 91:193.0 92:305.0 94:153.0 97:748.0 101:759.0 103:1633.0 110:1040.0 115:939.0 116:454.0 117:39274.0 118:3575.0 119:1931.0 127:624.0 131:1857.0 133:3826.0 137:250.0 140:4249.0 142:339.0 147:24010.0 148:3080.0 149:2216.0 150:108.0 155:254.0 163:151.0 167:121.0 205:1181.0 206:148.0 212:38.0 236:65.0 249:357.0 252:55.0 262:31.0 274:28.0 277:53.0 279:51.0 292:25.0 297:29.0 304:30.0 310:19.0 3…	259994		DNIAPMSPPWPWGF-GSVOUGTGSA-N			135959	62130	61488	67612	56115	43517	30140	81062	57619	62661	34482	71519	45908	49236	53589
pinitol	622466	260	16544	85:9395.0 86:1247.0 87:3795.0 88:1582.0 89:101591.0 90:8600.0 91:6349.0 92:451.0 93:526.0 94:227.0 95:1533.0 96:175.0 97:1364.0 98:1082.0 99:8159.0 100:1129.0 101:11924.0 102:3254.0 103:78294.0 104:7604.0 105:5939.0 106:408.0 107:576.0 108:301.0 109:3162.0 110:453.0 111:5748.0 112:942.0 113:3906.0 114:782.0 115:5105.0 116:17470.0 117:11099.0 118:1686.0 119:8789.0 120:980.0 121:694.0 122:26.0 123:…	164619	C03844	DSCFFEYYQKSRSV-FEPQRWDDSA-N			2355	549	2276	1128	1051	2569	861	2149	920	1087	1002	1007	1406	1052	851
phosphate	345365	314	4	85:2157.0 86:4845.0 87:5305.0 88:1544.0 89:6178.0 90:913.0 91:5486.0 92:639.0 93:1090.0 94:256.0 95:178.0 96:901.0 97:221.0 98:1216.0 99:626.0 100:3524.0 103:17906.0 104:4250.0 105:12326.0 106:1911.0 107:7514.0 108:751.0 109:2429.0 110:239.0 112:225.0 113:1044.0 114:607.0 115:23611.0 116:3246.0 117:2166.0 118:1082.0 119:15220.0 120:2183.0 121:11456.0 122:1330.0 123:5152.0 124:478.0 125:397.0 126:…	1004	C00009	NBIIXXVUZAFLBC-UHFFFAOYSA-N			25753	29117	22931	18765	29625	13448	23754	21436	22919	10393	21081	17346	18909	37017	33212
phenylethylamine	513300	174	16890	86:5896.0 87:600.0 88:548.0 90:188.0 91:2636.0 92:206.0 93:1.0 97:1.0 98:48.0 99:129.0 100:2765.0 101:192.0 102:109.0 103:2633.0 104:279.0 107:378.0 108:74.0 110:55.0 113:65.0 114:106.0 116:481.0 121:196.0 122:31.0 124:2.0 127:165.0 128:135.0 129:158.0 130:745.0 134:29.0 135:9.0 139:10.0 143:120.0 144:297.0 146:47.0 155:163.0 158:53.0 160:164.0 161:9.0 162:213.0 172:80.0 174:6708.0 175:987.0 176:…	1001	C05332	BHHGXPLMPWCGHP-UHFFFAOYSA-N			1394	1770	1349	2387	1667	1689	841	1845	2126	1896	814	2163	2485	2622	2667
perseitol	783164	319	18241	85:5668.0 86:1904.0 87:9707.0 88:7157.0 89:34791.0 90:3457.0 91:1718.0 92:299.0 93:315.0 94:492.0 95:1175.0 96:380.0 97:28084.0 98:2216.0 99:4987.0 100:727.0 101:25745.0 102:5444.0 103:332730.0 104:30844.0 105:14528.0 106:1002.0 107:500.0 108:271.0 109:820.0 110:204.0 111:3101.0 112:678.0 113:6376.0 114:1169.0 115:6588.0 116:7758.0 117:136975.0 118:14436.0 119:10736.0 120:1084.0 121:608.0 122:136…	441436	C08255	OXQKEKGBFMQTML-RYRJNEICSA-N			1646	1680	1827	1942	1806	2569	1437	1533	731	1507	961	1250	600	1060	1407
pentono-gamma-lactone	547150	244	131146	85:1147.0 86:340.0 87:1245.0 88:396.0 89:4353.0 90:410.0 91:124.0 94:124.0 95:283.0 96:111.0 97:332.0 98:221.0 101:4319.0 102:6707.0 103:9280.0 104:1094.0 105:665.0 106:104.0 107:70.0 108:89.0 109:60.0 111:695.0 112:166.0 113:1130.0 114:195.0 115:1361.0 116:577.0 117:16924.0 118:1664.0 119:1743.0 120:233.0 121:151.0 122:37.0 123:29.0 126:112.0 127:560.0 128:102.0 129:4192.0 130:4583.0 131:3811.0 …	219575		CUOKHACJLGPRHD-UHFFFAOYSA-N			1307	1652	1669	2366	976	1609	1270	1681	1672	1610	986	2026	5604	5106	5260
pentitol	563801	307	3469	88:123.0 89:928.0 90:108.0 98:69.0 99:137.0 100:7.0 101:8.0 102:154.0 103:5399.0 104:501.0 105:177.0 111:32.0 113:1.0 115:213.0 116:137.0 117:1282.0 118:98.0 119:45.0 120:2.0 123:3.0 127:233.0 130:1217.0 131:731.0 132:207.0 133:669.0 134:177.0 135:78.0 136:8.0 141:13.0 142:18.0 143:369.0 146:76.0 147:4380.0 148:590.0 149:104.0 150:28.0 151:35.0 157:1254.0 158:93.0 159:28.0 161:15.0 163:15.0 168:3…	827	D00061	HEBKCHPVOIAQTA-UHFFFAOYSA-N			1745	3003	2051	2367	2353	1573	1968	2060	1449	787	509	2755	1900	1820	1448
oxoproline	488374	156	397705	85:1084092.0 86:1149096.0 87:243823.0 88:162409.0 89:172142.0 90:64711.0 91:62490.0 92:72039.0 93:91691.0 94:189441.0 95:107399.0 96:165487.0 97:177393.0 98:405156.0 99:540352.0 100:1102669.0 101:282187.0 102:229366.0 103:414995.0 104:118290.0 105:255794.0 106:58418.0 107:51976.0 108:134812.0 109:56163.0 110:248672.0 111:139218.0 112:1189162.0 113:434526.0 114:582317.0 115:496509.0 116:209764.0 1…	7405		ODHCTXKNWHHXJC-VKHMYHEASA-N			100801	39430	65416	34067	82295	47335	48840	48124	33370	14710	78023	49107	57622	56541	53142
ornithine	619196	142	171971	85:723.0 86:2210.0 89:192.0 90:259.0 92:74.0 94:128.0 98:578.0 99:450.0 100:4187.0 101:103.0 102:1982.0 109:83.0 110:315.0 112:594.0 113:282.0 114:353.0 115:942.0 116:608.0 117:820.0 124:182.0 128:1141.0 130:499.0 131:1201.0 132:341.0 139:77.0 140:373.0 142:24823.0 143:2656.0 144:1067.0 147:2495.0 148:904.0 153:99.0 155:113.0 158:106.0 160:217.0 169:314.0 170:137.0 172:1044.0 173:40.0 174:7343.0 …	88747248	C00077	AHLPHDHHMVZTML-BYPYZUCNSA-N			8975	6014	4442	2067	10029	6056	4413	4773	1817	1663	2936	3081	2855	3298	3559
oleic acid	778746	339	209167	85:3872.0 86:566.0 87:1241.0 88:607.0 89:2769.0 90:148.0 91:2232.0 92:922.0 93:6077.0 94:371.0 95:7828.0 96:11170.0 97:5823.0 98:12313.0 99:1884.0 102:485.0 104:128.0 105:3581.0 107:1313.0 108:664.0 109:2748.0 110:4966.0 111:5154.0 112:1729.0 113:601.0 114:168.0 116:3461.0 117:45835.0 118:5820.0 119:3652.0 120:852.0 121:815.0 122:664.0 123:4223.0 124:1676.0 125:925.0 127:589.0 128:263.0 129:41102…	445639	C00712	ZQPPMHVWECSIRJ-KTKRTIGZSA-N			2017	16607	19690	14148	16416	20959	13455	20258	15566	15754	19126	15916	33042	33694	41568
oleamide	849710	144	20961	85:426.0 86:402.0 87:144.0 89:353.0 90:711.0 91:1369.0 92:194.0 93:400.0 94:235.0 95:556.0 96:526.0 97:627.0 98:214.0 99:199.0 100:1197.0 101:249.0 102:259.0 104:85.0 105:184.0 106:90.0 107:124.0 108:222.0 109:239.0 110:336.0 111:154.0 113:111.0 114:132.0 115:2827.0 116:11090.0 117:1116.0 118:448.0 119:161.0 120:59.0 121:55.0 122:381.0 123:147.0 124:172.0 125:88.0 126:316.0 127:230.0 128:10813.0 …	5283387	C19670	FATBGEAMYMYZAF-KTKRTIGZSA-N			2694	2106	1673	874	505	287	192	309	284	532	302	291	713	265	286
nicotinic acid	366992	180	285	85:402.0 86:47.0 87:81.0 90:191.0 91:76.0 94:43.0 99:36.0 100:31.0 103:50.0 105:288.0 106:4046.0 107:327.0 109:67.0 110:145.0 118:33.0 122:66.0 123:45.0 126:72.0 129:143.0 134:280.0 135:48.0 136:4959.0 137:603.0 138:162.0 139:22.0 153:17.0 156:104.0 158:16.0 160:19.0 165:17.0 166:29.0 167:25.0 171:18.0 175:13.0 179:34.0 180:4823.0 181:551.0 182:132.0 184:156.0 195:164.0 196:32.0 198:40.0 200:20.0…	938	C00253	PVNIIMVLHYAWGP-UHFFFAOYSA-N			3729	3889	486	5765	2950	3593	3276	3053	7748	4015	2830	4976	3283	2347	2765
N-acetylmannosamine	723255	202	110343	85:627.0 86:261.0 87:21356.0 88:1373.0 89:5326.0 90:130.0 91:161.0 95:237.0 96:68.0 97:1088.0 98:343.0 99:1634.0 100:2143.0 101:1471.0 102:1075.0 103:9375.0 104:938.0 105:1028.0 107:87.0 108:134.0 109:278.0 111:454.0 112:509.0 113:954.0 114:629.0 115:703.0 116:3570.0 117:10573.0 118:1265.0 119:647.0 120:158.0 122:136.0 123:291.0 124:123.0 125:136.0 126:277.0 127:331.0 128:962.0 129:16447.0 130:32…	11096158		OVRNDRQMDRJTHS-OZRXBMAMSA-N			13045	11774	10112	13124	9254	12115	7450	10532	11094	10137	4012	12251	9819	9606	8617
myo-inositol	730022	305	1741	85:113.0 86:491.0 87:31.0 88:19.0 89:298.0 90:43.0 95:6.0 99:170.0 100:411.0 101:320.0 102:164.0 103:3399.0 104:366.0 105:2.0 107:22.0 108:49.0 109:262.0 111:243.0 112:149.0 113:176.0 114:90.0 115:187.0 116:296.0 117:1042.0 118:228.0 119:212.0 121:1.0 123:6.0 124:38.0 125:22.0 126:73.0 127:67.0 128:163.0 129:4240.0 130:611.0 131:1566.0 132:262.0 133:3203.0 134:572.0 135:421.0 136:43.0 138:92.0 13…	892	C00137	CDAISMWEOUEBRE-UHFFFAOYSA-N			754934	824914	599799	679605	919289	604689	620538	682660	566023	571926	365406	733415	454630	423897	441129
mucic acid	709842	333	6426	85:27.0 88:2.0 89:28.0 90:101.0 93:21.0 95:66.0 99:171.0 101:153.0 102:448.0 103:1679.0 104:125.0 105:13.0 106:2.0 107:23.0 110:36.0 111:100.0 115:17.0 117:651.0 118:112.0 121:8.0 124:1.0 128:77.0 129:1082.0 130:312.0 131:424.0 133:1205.0 134:12.0 135:82.0 136:4.0 137:3.0 139:2.0 140:41.0 141:17.0 142:106.0 143:1480.0 144:111.0 145:32.0 146:17.0 147:6387.0 148:679.0 149:640.0 150:1.0 152:3.0 153:…	3037582	C00879	DSLZVSRJTYRBFB-DUHBMQHGSA-N			22928	25462	34985	17810	23151	27709	16334	42978	24337	19407	5447	27500	28793	28822	29876
monoheptadecanoyl glyceride	930489	385	100060	85:1382.0 86:63.0 89:307.0 90:107.0 93:252.0 95:1766.0 96:742.0 97:1153.0 98:389.0 99:681.0 101:3825.0 102:186.0 103:2040.0 104:137.0 105:60.0 109:834.0 111:385.0 112:65.0 113:119.0 114:12.0 115:332.0 116:1577.0 117:2570.0 118:337.0 120:6.0 121:307.0 123:542.0 124:76.0 125:84.0 128:25.0 129:3697.0 130:430.0 131:1852.0 132:611.0 133:644.0 134:357.0 137:228.0 138:12.0 139:31.0 141:4.0 142:25.0 143:…	107036		SVUQHVRAGMNPLW-UHFFFAOYSA-N			988	840	720	1484	632	829	480	813	611	1243	560	975	565	656	523
melibiose	988497	361	4730	87:30.0 88:14.0 89:775.0 90:43.0 96:163.0 99:91.0 100:296.0 101:841.0 102:257.0 103:3880.0 104:223.0 105:205.0 109:146.0 113:136.0 114:48.0 116:215.0 117:1162.0 118:29.0 125:3.0 129:2842.0 130:613.0 131:483.0 133:1258.0 134:133.0 135:18.0 137:14.0 138:29.0 139:3.0 140:57.0 141:70.0 142:53.0 143:226.0 145:162.0 147:3683.0 148:373.0 149:291.0 150:67.0 153:61.0 154:4.0 155:526.0 156:117.0 157:540.0 …	440658	C05402	DLRVVLDZNNYCBX-ABXHMFFYSA-N			44050	58485	56250	41683	37239	37254	37042	40016	30302	22797	25363	33008	25619	23865	20974
melezitose	1141909	361	370903	85:1290.0 86:318.0 87:718.0 88:677.0 89:2512.0 90:51.0 93:284.0 95:194.0 96:292.0 97:375.0 99:1039.0 100:456.0 101:2633.0 102:612.0 103:17174.0 104:1098.0 105:1459.0 108:236.0 109:953.0 110:272.0 111:974.0 112:317.0 113:626.0 114:375.0 115:1139.0 116:133.0 117:6979.0 119:842.0 122:37.0 124:206.0 125:237.0 127:160.0 128:416.0 129:12641.0 130:2228.0 131:1990.0 133:2767.0 134:773.0 135:602.0 137:27.…	92817	C08243	QWIZNVHXZXRPDR-WSCXOGSTSA-N			10852	10236	7429	13299	7799	6242	3160	9802	9220	10316	5011	15497	7232	6020	4925
mannose	645856	205	70	85:142.0 89:1499.0 90:197.0 97:127.0 100:159.0 101:419.0 103:3780.0 104:287.0 105:648.0 112:23.0 113:305.0 114:520.0 115:388.0 116:86.0 117:2228.0 118:207.0 119:568.0 124:18.0 125:22.0 129:3108.0 131:511.0 133:1928.0 134:567.0 135:210.0 141:65.0 143:275.0 144:234.0 147:7354.0 150:205.0 152:14.0 157:1447.0 158:309.0 159:104.0 160:3213.0 161:172.0 162:117.0 163:130.0 164:22.0 167:7.0 169:89.0 170:1…	18950	C00159	WQZGKKKJIJFFOK-QTVWNMPRSA-N			28236	43950	29360	24707	22502	23054	368975	22753	30867	28606	2345762	26616	27976	25271	27472
mannoheptulose	735323	319	3244	85:1141.0 86:451.0 87:885.0 88:794.0 89:7966.0 90:778.0 91:624.0 93:87.0 94:49.0 95:261.0 96:255.0 97:763.0 98:285.0 99:645.0 100:1414.0 101:2282.0 102:588.0 103:22851.0 104:2059.0 105:1722.0 106:141.0 108:12.0 109:340.0 110:235.0 111:311.0 113:842.0 114:5548.0 115:953.0 116:1164.0 117:12085.0 118:1540.0 119:1530.0 120:118.0 123:92.0 125:29.0 126:101.0 127:736.0 128:479.0 129:16363.0 130:2769.0 1…			HSNZZMHEPUFJNZ-QMTIVRBISA-N			28471	20262	42288	16446	28017	32686	15668	52601	16554	17015	12619	19806	23535	17907	19162
maltose	946601	361	1979	85:18.0 86:40.0 87:38.0 89:640.0 90:50.0 94:3.0 95:51.0 96:226.0 97:52.0 98:60.0 99:10.0 100:262.0 101:31.0 102:157.0 103:2571.0 104:171.0 105:231.0 108:7.0 109:86.0 111:17.0 112:13.0 113:130.0 114:62.0 116:82.0 117:1560.0 118:98.0 119:98.0 125:5.0 127:10.0 128:39.0 129:1849.0 130:331.0 131:223.0 132:24.0 133:813.0 134:81.0 140:25.0 141:77.0 142:107.0 143:428.0 145:58.0 147:3256.0 148:427.0 149:3…	439186	C00208	GUBGYTABKSRVRQ-PICCSMPSSA-N			9333	10895	10614	2467	4386	8795	24893	12092	9794	4691	6771	11643	1821	6571	6996
malic acid	463180	233	1391	85:66.0 87:316.0 88:106.0 89:148.0 90:42.0 95:37.0 99:129.0 101:4462.0 102:488.0 103:641.0 104:93.0 105:294.0 115:533.0 116:432.0 117:2305.0 118:259.0 119:501.0 120:70.0 121:62.0 124:21.0 129:385.0 131:1945.0 132:129.0 133:6850.0 134:1075.0 135:667.0 136:51.0 137:33.0 139:20.0 142:41.0 143:745.0 144:107.0 145:145.0 147:21089.0 148:2969.0 149:2528.0 150:99.0 151:286.0 153:24.0 158:12.0 159:29.0 16…	525	C00711	BJEPYKJPYRNKOW-UHFFFAOYSA-N			74585	103875	114177	42063	126731	35901	244892	133218	24621	27673	80836	60707	77954	62503	55447
maleimide	245118	154	1743	85:294.0 86:375.0 87:61.0 88:60.0 92:7.0 93:188.0 94:171.0 96:191.0 97:130.0 99:129.0 100:1406.0 101:44.0 102:144.0 103:750.0 105:72.0 107:179.0 110:1243.0 111:89.0 114:287.0 115:459.0 116:31.0 117:256.0 126:37.0 127:659.0 128:781.0 130:926.0 131:244.0 133:167.0 134:886.0 135:5.0 141:1.0 144:9.0 146:57.0 147:1899.0 149:79.0 150:32.0 154:6151.0 155:630.0 156:263.0 157:17.0 160:56.0 167:18.0 168:5.…	10935	C07272	PEEHTFAAVSWFBL-UHFFFAOYSA-N			18018	6298	6274	9125	4819	15928	5337	6309	5845	7259	5791	6395	6801	8047	11847
maleic acid	365746	245	486561	85:72282.0 86:13877.0 87:30961.0 88:6161.0 89:18207.0 90:2221.0 91:2306.0 92:1524.0 94:998.0 95:2713.0 96:1461.0 97:7811.0 98:77584.0 99:39201.0 100:10438.0 101:20152.0 102:12743.0 103:49866.0 104:7841.0 105:21408.0 106:2695.0 107:2509.0 109:508.0 111:11912.0 112:2428.0 113:50456.0 114:5861.0 115:159938.0 116:20395.0 117:59055.0 118:9676.0 119:20411.0 120:2580.0 121:1798.0 122:243.0 124:258.0 125…	444266		VZCYOOQTPOCHFL-UPHRSURJSA-L			340	254	198	239	340	125	1613	348	306	223	215	347	150	217	374
lyxose	540818	217	360841	86:84.0 87:151.0 88:150.0 89:2738.0 90:255.0 91:147.0 100:725.0 101:866.0 102:397.0 103:16183.0 104:1583.0 105:958.0 112:39.0 113:133.0 114:181.0 115:222.0 116:195.0 117:2331.0 118:244.0 119:285.0 120:38.0 127:111.0 128:36.0 129:1766.0 130:290.0 131:842.0 132:128.0 133:1834.0 134:293.0 135:187.0 138:20.0 142:84.0 143:261.0 144:52.0 145:129.0 146:52.0 147:5147.0 148:807.0 149:544.0 157:106.0 158:8…	439240	C00476	SRBFZHDQGSBBOR-AGQMPKSLSA-N			79655	146489	85402	134428	95465	112470	64274	104530	114293	121241	51970	122519	147883	136643	145859
lyxitol	573587	217	233	85:649.0 86:59.0 87:142.0 88:75.0 89:607.0 95:25.0 97:25.0 99:247.0 100:57.0 101:550.0 102:92.0 103:6136.0 104:480.0 105:198.0 106:44.0 111:98.0 112:73.0 113:193.0 114:48.0 115:140.0 116:225.0 117:3144.0 118:289.0 119:258.0 120:15.0 127:102.0 129:2235.0 130:260.0 131:777.0 133:1341.0 134:87.0 135:42.0 141:89.0 143:195.0 144:16.0 145:61.0 147:6082.0 148:964.0 149:538.0 150:39.0 151:43.0 157:231.0 …	439255	C00532	HEBKCHPVOIAQTA-IMJSIDKUSA-N			13971	16775	14650	22979	20566	23043	22716	29269	26875	31175	28129	4131	22334	28586	31095
lysine	663483	317	12	85:2755.0 86:29130.0 87:3786.0 88:12077.0 89:1291.0 90:709.0 92:136.0 93:103.0 94:668.0 95:313.0 96:506.0 97:609.0 98:2819.0 99:1955.0 100:31497.0 101:4429.0 102:7671.0 103:3645.0 104:565.0 105:379.0 106:83.0 107:97.0 108:128.0 109:134.0 110:753.0 111:416.0 112:6522.0 113:2018.0 114:7116.0 115:10574.0 116:3465.0 117:4929.0 118:1028.0 119:900.0 120:191.0 121:127.0 123:145.0 124:606.0 125:212.0 126…	5962	C00047	KDXKERNSBIXSRK-YFKPBYRVSA-N			25757	11148	13142	13097	2192	13901	6965	8941	7817	7781	3969	16670	6844	6154	6959
loganin	995897	361	6406	85:570.0 86:106.0 87:378.0 88:293.0 89:309.0 91:421.0 94:30.0 96:321.0 97:260.0 98:77.0 99:204.0 100:35.0 101:329.0 103:5537.0 104:486.0 105:147.0 109:212.0 112:134.0 113:235.0 114:238.0 115:40.0 116:185.0 117:1079.0 118:14.0 119:502.0 120:116.0 125:94.0 127:74.0 128:182.0 129:2071.0 130:211.0 131:542.0 132:41.0 133:314.0 134:36.0 139:49.0 140:119.0 141:120.0 142:6.0 143:354.0 144:91.0 145:262.0 …	87691	C01433	AMBQHHVBBHTQBF-UOUCRYGSSA-N			2590	11629	10385	7184	15646	9395	6031	14881	4895	4078	367	6088	10362	8172	5270
linolenic acid	780376	335	4704	85:8263.0 86:3076.0 87:2638.0 88:1997.0 89:7764.0 90:1581.0 91:88210.0 92:18165.0 93:106470.0 94:49681.0 95:90232.0 96:13310.0 97:12053.0 98:4717.0 99:6412.0 100:1262.0 101:3274.0 102:1160.0 103:5418.0 104:2581.0 105:34033.0 106:9798.0 107:47500.0 108:55116.0 109:22200.0 110:3750.0 111:4531.0 112:1209.0 113:1357.0 114:277.0 115:3868.0 116:10630.0 117:51242.0 118:6917.0 119:21073.0 120:8375.0 121:…	5280934	C06427	DTOSIQBPPRVQHS-PDBXOOCHSA-N			3503	1281	3660	4236	627	3775	3122	5009	2718	3357	4009	1887	6045	8822	7759
linoleic acid	777414	337	165	85:1534.0 86:470.0 87:386.0 88:244.0 89:1256.0 90:176.0 91:6885.0 92:1525.0 93:8654.0 94:6153.0 95:14372.0 96:7918.0 97:3896.0 98:518.0 99:829.0 100:115.0 101:441.0 102:166.0 103:421.0 104:436.0 105:2615.0 106:995.0 107:4482.0 108:3591.0 109:5935.0 110:3865.0 111:1556.0 112:178.0 113:194.0 115:385.0 116:1903.0 117:9875.0 118:1041.0 119:1844.0 120:836.0 121:4850.0 122:2280.0 123:2389.0 124:1664.0 …	5280450	C01595	OYHQOLUKZRVURQ-HZJYTTRNSA-N			34055	22877	40397	54170	35544	46656	32987	40092	34955	46897	48013	22858	63139	84975	81370
levoinositol	651238	432	341732	93:362.0 95:318.0 109:1737.0 111:1893.0 123:290.0 125:748.0 137:223.0 139:541.0 143:9247.0 151:615.0 153:925.0 155:841.0 156:2635.0 167:211.0 175:539.0 177:2060.0 178:328.0 179:2128.0 180:408.0 181:767.0 183:212.0 185:274.0 190:2629.0 191:58652.0 192:11393.0 193:5540.0 194:756.0 195:232.0 197:192.0 203:1082.0 204:5811.0 213:197.0 215:867.0 217:56642.0 218:10293.0 219:4391.0 220:445.0 221:13081.0 …	892		CDAISMWEOUEBRE-UHFFFAOYSA-N			6046	5939	5625	6746	6833	5301	4927	5082	5280	5229	3436	6255	3956	3576	2848
levoglucosan	569637	204	3169	85:775.0 87:165.0 88:163.0 89:177.0 90:42.0 91:21.0 92:2.0 95:13.0 97:132.0 98:53.0 99:731.0 100:180.0 101:2830.0 102:212.0 103:5456.0 104:270.0 105:366.0 109:317.0 111:424.0 112:33.0 113:818.0 114:131.0 115:724.0 116:1575.0 117:3643.0 118:337.0 119:568.0 120:38.0 125:69.0 126:44.0 127:263.0 129:5991.0 130:703.0 131:1830.0 132:221.0 133:3867.0 134:297.0 135:293.0 136:48.0 139:2.0 140:20.0 141:67.…	2724705	C22350	TWNIBLMWSKIRAT-VFUOTHLCSA-N			166925	235602	193430	206003	205291	173876	164336	221291	178111	168278	137067	217528	125386	116494	116978
leucine	280176	86	453	85:2866.0 86:48433.0 87:4176.0 89:655.0 91:1047.0 92:155.0 95:67.0 96:510.0 97:153.0 98:109.0 99:175.0 101:162.0 102:486.0 103:1914.0 104:760.0 105:393.0 106:217.0 114:153.0 116:224.0 118:384.0 121:58.0 126:283.0 128:481.0 129:854.0 130:913.0 131:625.0 132:367.0 142:316.0 144:105.0 146:2081.0 151:48.0 152:30.0 153:64.0 158:64.0 159:53.0 160:86.0 161:68.0 165:900.0 166:125.0 170:1061.0 171:585.0 1…	7045798	C00123	ROHFNLRQFUQHCH-YFKPBYRVSA-N			26616	13873	15690	12542	33778	15322	20656	15255	12550	15356	8112	23434	14686	10473	11638
lauric acid	548241	257	376628	87:1217.0 88:1520.0 90:483.0 95:5033.0 96:1257.0 97:2691.0 98:2109.0 101:2208.0 105:2906.0 107:1097.0 111:1730.0 112:1094.0 114:368.0 115:461.0 116:6131.0 117:62681.0 118:10226.0 119:1492.0 125:721.0 126:908.0 127:505.0 129:34769.0 131:11197.0 132:19932.0 133:650.0 134:1673.0 135:502.0 136:204.0 143:2197.0 145:9369.0 146:1108.0 147:1722.0 154:113.0 155:267.0 157:934.0 158:309.0 159:315.0 185:882.…	3893	C02679	POULHZVOKOAJMA-UHFFFAOYSA-N			2350	2380	2153	2960	1664	2207	1176	976	2984	2715	1344	3012	12341	13052	13431
lactose	935458	191	385022	85:2135.0 87:1088.0 88:549.0 89:2857.0 93:337.0 94:477.0 95:477.0 97:1174.0 98:178.0 99:1393.0 101:6309.0 102:1324.0 103:35754.0 104:4036.0 105:1688.0 108:217.0 109:1718.0 111:1870.0 113:1960.0 114:837.0 115:2658.0 116:5603.0 117:13901.0 118:1918.0 119:1449.0 121:201.0 123:158.0 124:137.0 125:377.0 126:212.0 127:1520.0 128:1517.0 129:28891.0 130:4431.0 131:7806.0 132:1476.0 133:8166.0 134:1242.0 …	84571		GUBGYTABKSRVRQ-XLOQQCSPSA-N			24057	29677	25084	52564	24926	38383	37336	31669	47438	45220	23562	48456	40155	42683	37404
lactic acid	219848	191	46123	86:16619.0 87:146789.0 88:203478.0 89:44021.0 90:4589.0 91:5399.0 92:2326.0 93:2115.0 94:10118.0 95:3417.0 96:954.0 97:589.0 99:12540.0 100:2928.0 101:119286.0 102:104206.0 103:90957.0 104:16144.0 105:36142.0 106:5020.0 107:5840.0 108:885.0 109:791.0 110:2194.0 113:11122.0 114:2567.0 115:74843.0 116:33695.0 117:2428105.0 118:268597.0 119:128879.0 120:10300.0 121:3135.0 122:950.0 123:1352.0 124:11…	612	C01432	JVTAAEKCZFNVCJ-UHFFFAOYSA-N			9290	9380	5924	11350	6906	9793	2886	9166	12135	9485	5835	10957	7287	11194	12353
isothreonic acid	486203	147	390562	89:17732.0 90:1375.0 95:1532.0 99:2312.0 101:10175.0 102:57711.0 103:68546.0 104:9175.0 105:5024.0 106:887.0 112:660.0 113:3350.0 115:7934.0 116:2815.0 117:86823.0 118:7229.0 119:7234.0 120:1417.0 129:20285.0 130:42684.0 131:24295.0 132:4133.0 133:41186.0 134:6446.0 135:4814.0 138:517.0 142:854.0 143:16344.0 144:1056.0 145:779.0 146:252.0 147:236171.0 148:36771.0 149:23603.0 150:2372.0 151:766.0 …	151152		JPIJQSOTBSSVTP-GBXIJSLDSA-N			24010	13663	14488	11246	14020	13824	10723	10740	11671	9425	9008	11676	21000	5750	13579
isomaltose	993307	361	102808	85:354.0 86:159.0 87:300.0 88:107.0 89:2566.0 90:219.0 91:69.0 94:27.0 95:98.0 96:86.0 97:217.0 98:61.0 99:317.0 100:1011.0 101:2135.0 102:674.0 103:10925.0 104:1013.0 105:1192.0 107:56.0 109:262.0 111:279.0 112:54.0 113:431.0 114:162.0 115:365.0 116:1120.0 117:4251.0 118:421.0 119:535.0 125:40.0 126:98.0 127:266.0 128:138.0 129:6215.0 130:891.0 131:1759.0 132:367.0 133:4135.0 134:423.0 135:395.0…	439193	C00252	DLRVVLDZNNYCBX-RTPHMHGBSA-N			1619	2350	1729	3214	1762	1518	1519	1386	1567	2924	1877	3155	1148	1183	1468
isoleucine	358551	158	470901	85:32924.0 86:108370.0 87:52977.0 88:64258.0 89:54886.0 90:26355.0 91:23936.0 92:3983.0 93:341.0 96:10873.0 97:7512.0 98:18305.0 99:10233.0 100:237335.0 101:66147.0 102:132203.0 103:97791.0 104:31071.0 105:36805.0 106:6771.0 107:8049.0 108:2309.0 109:1958.0 112:10381.0 113:9544.0 114:52049.0 115:24264.0 116:19977.0 117:109451.0 118:36484.0 119:46836.0 120:875.0 121:527356.0 122:69018.0 123:22076.…	6306	C00407	AGPKZVBTJJNPAG-WHFBIAKZSA-N			11299	8664	7258	7165	22416	11125	10332	13462	6493	10140	6097	18119	7275	6650	9650
isochlorogenic acid	1072927	307	125867	85:4528.0 86:961.0 87:3931.0 88:6789.0 89:11168.0 90:1368.0 91:11280.0 92:2506.0 93:9420.0 94:1657.0 95:3738.0 96:874.0 97:2653.0 98:1204.0 99:4973.0 100:871.0 101:10281.0 102:5515.0 103:34250.0 104:4588.0 105:9297.0 106:1334.0 107:1974.0 108:551.0 109:3362.0 110:612.0 111:3554.0 112:1895.0 113:3830.0 114:911.0 115:17155.0 116:5444.0 117:21759.0 118:2793.0 119:8219.0 120:1152.0 121:3803.0 122:659…	5315832		CWVRJTMFETXNAD-DUXPYHPUSA-N			5528	2382	1801	5679	1701	4275	893	4242	3590	3179	2048	3840	2805	3381	3468
inositol-4-monophosphate	845976	315	4759	100:40.0 104:35.0 107:57.0 113:34.0 117:5.0 128:7.0 129:318.0 133:192.0 137:66.0 142:185.0 143:288.0 144:3.0 147:3716.0 148:705.0 150:3.0 151:84.0 153:82.0 155:66.0 156:40.0 158:31.0 159:5.0 163:11.0 164:91.0 166:55.0 167:35.0 168:65.0 169:49.0 173:33.0 177:50.0 178:26.0 180:12.0 181:79.0 182:9.0 183:29.0 189:11.0 190:133.0 191:543.0 192:52.0 194:70.0 195:10.0 196:25.0 201:25.0 207:133.0 209:68.0…	440043	C03546	INAPMGSXUVUWAF-GFWFORPUSA-N			1780	1118	1233	1515	916	774	907	1093	915	333	1803	1019	1920	2031	2263
hydroxylamine	250536	146	170785	85:1551.0 86:18668.0 87:6866.0 88:4146.0 89:1152.0 90:248.0 91:195.0 94:37.0 95:185.0 96:87.0 99:1031.0 100:11932.0 101:2035.0 102:2824.0 103:1946.0 104:427.0 105:507.0 106:193.0 112:77.0 113:2679.0 114:2485.0 115:1986.0 116:2598.0 117:3531.0 118:933.0 119:28777.0 120:3663.0 121:2005.0 122:90.0 123:36.0 128:129.0 129:321.0 130:13937.0 131:6231.0 132:4075.0 133:35994.0 134:5994.0 135:2633.0 136:23…	787	C00192	AVXURJPOCDRRFD-UHFFFAOYSA-N			1624	2181	2200	1809	1659	1901	1262	3488	611	2886	1621	4607	2908	4786	4930
hydroquinone	422583	239	16709	85:15.0 86:19.0 88:14.0 91:275.0 94:176.0 95:72.0 96:114.0 97:3.0 98:65.0 110:71.0 112:755.0 113:60.0 120:6.0 123:15.0 124:34.0 130:1.0 134:225.0 135:23.0 138:35.0 140:20.0 144:12.0 147:267.0 167:13.0 174:41.0 182:51.0 196:25.0 211:51.0 212:37.0 223:305.0 224:15.0 225:20.0 237:5.0 239:2779.0 240:576.0 241:199.0 254:1651.0 255:346.0 256:81.0 258:5.0 261:4.0 299:12.0 301:9.0 316:15.0 327:20.0 333:7…	785	C00530	QIGBRXMKCJKVMJ-UHFFFAOYSA-N			10419	10432	16073	19192	13003	17364	10514	15295	16043	18444	9698	27809	11861	13228	13517
heneicosanoic acid	888752	117	534671	85:729.0 86:169.0 89:792.0 90:95.0 91:290.0 93:728.0 95:722.0 97:1530.0 98:1210.0 99:359.0 102:219.0 105:325.0 107:109.0 109:515.0 110:267.0 111:476.0 112:390.0 113:244.0 114:121.0 116:489.0 117:22680.0 118:2105.0 119:798.0 121:303.0 123:178.0 124:122.0 125:302.0 126:128.0 127:227.0 129:9522.0 130:888.0 131:2535.0 132:9021.0 133:2009.0 134:576.0 136:65.0 145:6505.0 146:815.0 147:416.0 151:111.0 1…	16898		CKDDRHZIAZRDBW-UHFFFAOYSA-N			6859	10333	2781	7953	3840	3248	2208	6011	6086	6147	2042	5111	7804	6442	7204
glycyl tyrosine	922071	174	62472	86:1091.0 95:27.0 100:203.0 114:27.0 118:36.0 130:89.0 146:117.0 158:36.0 160:9.0 161:13.0 164:41.0 172:46.0 173:8.0 174:4074.0 175:790.0 176:566.0 177:154.0 178:80.0 179:390.0 180:59.0 187:56.0 201:14.0 213:11.0 214:2.0 215:4.0 220:8.0 229:36.0 232:2.0 233:8.0 234:5.0 250:22.0 256:4.0 262:13.0 274:1.0 275:6.0 284:3.0 291:12.0 293:47.0 294:16.0 307:5.0 308:299.0 309:83.0 310:55.0 311:34.0 312:4.0…	92829		XBGGUPMXALFZOT-VIFPVBQESA-N			9504	38306	15380	36561	17494	27383	7302	5310	15982	9160	12217	4477	26540	19912	19439
glycolic acid	227636	177	1971	86:321.0 87:877.0 88:2215.0 89:1177.0 90:166.0 92:46.0 95:690.0 98:47.0 99:43.0 100:1.0 101:491.0 102:395.0 103:3236.0 104:445.0 105:759.0 106:5.0 107:431.0 110:197.0 113:123.0 114:1.0 115:778.0 116:235.0 117:2708.0 118:351.0 119:694.0 120:123.0 121:18.0 124:3.0 131:2476.0 132:305.0 133:6921.0 134:1259.0 135:297.0 144:1.0 146:382.0 147:57199.0 148:9255.0 149:5731.0 150:464.0 151:221.0 161:3331.0 …	757	C00160	AEMRFAOFKBGASW-UHFFFAOYSA-N			1310	13451	10308	15257	8366	12783	5741	10195	11464	11656	8582	16214	9884	10559	11251
glycine	368707	248	6	85:2882.0 86:87494.0 87:10917.0 88:4018.0 89:822.0 92:65.0 93:42.0 94:27.0 95:426.0 96:50.0 97:67.0 99:1489.0 100:53029.0 101:10140.0 102:5892.0 103:928.0 105:1276.0 110:146.0 113:1787.0 114:44.0 115:2820.0 116:1864.0 117:12472.0 118:47.0 119:3422.0 122:40.0 123:85.0 125:63.0 129:156.0 130:9640.0 131:7466.0 132:862.0 133:31722.0 134:5661.0 135:2633.0 144:2949.0 145:349.0 146:1208.0 147:26782.0 14…	750	C00037	DHMQDGOQFOQNFH-UHFFFAOYSA-N			2251	2566	2545	816	1063	3669	1998	3276	5434	1917	2527	2380	1026	2253	2261
glycerol-alpha-phosphate	590747	357	1687	85:750.0 87:846.0 88:468.0 89:1193.0 90:82.0 91:168.0 92:114.0 93:127.0 94:26.0 95:116.0 97:212.0 98:232.0 99:483.0 101:13348.0 102:1461.0 103:9463.0 104:991.0 105:689.0 106:35.0 107:239.0 108:36.0 109:51.0 111:385.0 113:2220.0 114:284.0 115:2195.0 116:2414.0 117:2066.0 118:407.0 119:755.0 120:59.0 121:349.0 122:90.0 123:101.0 125:30.0 127:73.0 129:6764.0 130:1365.0 131:6671.0 132:512.0 133:8224.…	754	C03189	AWUCVROLDVIAJX-UHFFFAOYSA-N			2794	881	778	1099	884	1092	1096	904	154	225	1565	146	936	845	1203
glycerol-3-galactoside	805227	204	1693	89:176.0 90:53.0 99:49.0 101:827.0 102:83.0 103:3126.0 104:331.0 105:191.0 109:15.0 113:33.0 115:65.0 116:293.0 117:746.0 118:35.0 119:28.0 122:1.0 123:8.0 128:61.0 129:2561.0 130:485.0 131:662.0 132:17.0 133:977.0 135:25.0 141:39.0 142:42.0 143:281.0 147:3311.0 148:255.0 149:318.0 151:50.0 155:78.0 156:127.0 157:175.0 159:38.0 160:42.0 161:110.0 163:57.0 169:415.0 170:55.0 171:14.0 175:57.0 177:…	16048618	C05401	NHJUPBDCSOGIKX-NTXXKDEISA-N			63400	60935	70849	94896	62347	50193	35365	71409	74166	67215	27272	86573	32249	28495	31263
glycerol	344466	205	30	85:1069.0 86:1979.0 87:2157.0 88:1086.0 89:5466.0 90:494.0 91:283.0 94:134.0 97:170.0 99:483.0 100:547.0 101:7688.0 102:1229.0 103:30772.0 104:2994.0 105:1697.0 106:143.0 108:135.0 109:140.0 111:130.0 112:89.0 113:993.0 114:232.0 115:2539.0 116:2329.0 117:35562.0 118:3659.0 119:3831.0 120:444.0 121:441.0 122:107.0 123:185.0 124:113.0 128:225.0 129:5116.0 130:612.0 131:6207.0 132:1094.0 133:25238.…	753	C00116	PEDCQBHIVMGVHV-UHFFFAOYSA-N			169830	157657	137283	81692	79071	495606	135557	163649	271092	261737	137350	119591	121201	122060	130349
glyceric acid	375052	189	203807	85:202.0 86:59.0 87:356.0 88:204.0 89:1230.0 90:86.0 91:41.0 93:6.0 97:1.0 98:13.0 99:126.0 100:5.0 101:2275.0 102:6907.0 103:7358.0 104:875.0 105:494.0 106:28.0 107:28.0 108:2.0 109:5.0 112:7.0 113:54.0 114:6.0 115:568.0 116:699.0 117:4268.0 118:408.0 119:699.0 120:59.0 121:35.0 122:3.0 124:1.0 127:59.0 129:148.0 130:2091.0 131:1677.0 132:285.0 133:7528.0 134:1102.0 135:741.0 136:55.0 137:7.0 13…	752		RBNPOMFGQQGHHO-UHFFFAOYSA-N			6337	10314	6521	9490	5842	15923	8240	3856	12219	8978	6544	11747	15112	15079	15309
glutaric acid	421260	261	1727	88:191.0 91:36.0 97:767.0 98:37.0 99:40.0 100:340.0 101:236.0 102:261.0 103:344.0 104:57.0 114:112.0 115:81.0 116:704.0 117:526.0 118:162.0 120:11.0 128:639.0 129:1748.0 130:358.0 131:182.0 132:119.0 133:497.0 135:53.0 142:34.0 143:21.0 144:1230.0 145:204.0 147:5413.0 148:702.0 149:827.0 151:43.0 158:934.0 159:179.0 160:47.0 186:172.0 187:30.0 189:439.0 199:13.0 203:445.0 204:296.0 205:234.0 217:…	743	C00489	JFCQEDHGNNZCLN-UHFFFAOYSA-N			607	518	497	616	548	634	44	423	591	479	304	612	434	360	229
glutamic acid	529100	246	28	85:1143.0 86:983.0 87:725.0 88:453.0 89:313.0 90:36.0 91:51.0 95:189.0 96:269.0 97:224.0 98:467.0 99:626.0 100:5243.0 101:1252.0 102:493.0 103:1043.0 104:79.0 105:259.0 108:335.0 109:58.0 110:448.0 111:44.0 112:737.0 113:669.0 114:1398.0 115:911.0 116:669.0 117:712.0 118:217.0 119:303.0 120:26.0 122:179.0 123:41.0 125:90.0 126:202.0 127:190.0 128:17149.0 129:3445.0 130:1476.0 131:1330.0 132:969.0…	33032	C00025	WHUUTDBJXJRKMK-VKHMYHEASA-N			1559	229	1002	329	2470	930	1424	813	527	505	3247	586	381	959	473
glucuronic acid	665901	333	344793	96:183.0 101:343.0 104:391.0 105:404.0 114:173.0 116:299.0 118:199.0 129:212.0 131:935.0 133:2270.0 140:93.0 142:73.0 143:1502.0 145:268.0 147:12395.0 148:991.0 149:975.0 157:922.0 158:137.0 160:9222.0 161:1178.0 163:298.0 169:69.0 184:291.0 189:2493.0 191:243.0 192:148.0 200:124.0 201:100.0 203:144.0 204:559.0 205:544.0 206:869.0 215:56.0 216:211.0 217:2377.0 218:761.0 219:1170.0 220:242.0 224:4…	94715	C00191	AEMOLEFTQBMNLQ-AQKNRBDQSA-N			9148	11355	9363	6757	10408	12766	11029	8205	5571	6037	2898	8253	9605	9182	9100
glucose-1-phosphate	594647	217	3167	85:385.0 86:98.0 87:248.0 88:286.0 89:468.0 90:224.0 92:20.0 95:218.0 99:284.0 101:1180.0 103:1916.0 104:47.0 107:220.0 109:96.0 110:193.0 111:260.0 112:20.0 113:386.0 114:41.0 115:209.0 116:863.0 117:2309.0 118:189.0 119:243.0 125:12.0 126:151.0 128:127.0 129:1571.0 130:306.0 131:508.0 132:123.0 133:2331.0 134:352.0 135:130.0 136:1.0 139:40.0 140:858.0 141:105.0 142:138.0 143:915.0 144:125.0 145…	65533	C00103	HXXFSFRBOHSIMQ-VFUOTHLCSA-N			294966	294394	315601	381702	475485	512802	313092	518238	508988	511635	296892	571923	348730	390422	389097
glucose	659798	319	22	85:955.0 86:739.0 87:1963.0 88:1249.0 89:23654.0 90:1741.0 91:1135.0 94:110.0 95:64.0 96:681.0 97:924.0 98:177.0 99:1302.0 100:4269.0 101:5985.0 102:2628.0 103:55876.0 104:5298.0 105:6003.0 106:471.0 107:134.0 108:44.0 109:106.0 110:151.0 111:715.0 112:295.0 113:1157.0 114:1065.0 115:1902.0 116:1693.0 117:24869.0 118:2407.0 119:3013.0 120:325.0 121:179.0 122:26.0 125:71.0 126:224.0 127:784.0 128:…	64689	C00221	WQZGKKKJIJFFOK-VFUOTHLCSA-N			350246	428605	351289	241304	260408	295211	695855	341461	167723	314147	353133	262935	236678	202223	198303
gluconic acid lactone	645815	220	3502	87:376.0 89:418.0 91:200.0 93:213.0 94:7.0 95:277.0 97:419.0 98:28.0 99:247.0 100:286.0 101:1266.0 102:1454.0 103:3165.0 104:660.0 105:405.0 106:2.0 107:9.0 109:98.0 111:303.0 112:10.0 113:395.0 115:310.0 117:3173.0 118:208.0 119:432.0 120:76.0 121:161.0 122:35.0 123:45.0 125:72.0 127:87.0 128:55.0 129:13415.0 130:2506.0 131:1543.0 132:118.0 133:3838.0 134:325.0 135:258.0 136:14.0 137:2.0 138:26.…	7027	C00198	PHOQVHQSTUBQQK-SQOUGZDYSA-N			27374	27247	36132	30375	33359	32395	27755	45119	28843	30161	14655	31518	22965	20399	20938
gluconic acid	693148	333	7501	87:39.0 89:155.0 99:15.0 100:306.0 101:268.0 102:393.0 103:2729.0 104:264.0 105:196.0 109:2.0 111:2.0 113:144.0 116:8.0 117:1117.0 118:12.0 127:30.0 129:1186.0 130:285.0 131:546.0 132:183.0 133:997.0 134:13.0 137:1.0 139:7.0 140:38.0 141:4.0 142:28.0 143:746.0 144:263.0 145:25.0 147:6161.0 148:1144.0 149:642.0 150:39.0 151:46.0 153:74.0 154:66.0 155:3.0 157:599.0 159:89.0 160:27.0 161:88.0 164:14…	6857417	C00800	RGHNJXZEOKUKBD-QTBDOELSSA-N			2884	6784	2403	2099	7046	5267	1029	3505	1044	2748	1020	2391	5422	4867	5257
glucoheptulose	828606	217	3191	85:139.0 86:13.0 89:1593.0 91:2.0 94:55.0 97:1692.0 98:126.0 99:121.0 100:313.0 101:365.0 103:5867.0 104:480.0 105:349.0 109:19.0 111:2.0 114:1800.0 115:154.0 116:242.0 117:2040.0 118:246.0 119:195.0 120:35.0 122:30.0 128:61.0 129:1591.0 130:174.0 131:183.0 133:1318.0 134:156.0 136:15.0 141:68.0 142:187.0 143:391.0 144:75.0 147:6372.0 148:889.0 149:623.0 152:13.0 154:11.0 156:61.0 157:517.0 158:1…	5459879	C02076	HSNZZMHEPUFJNZ-SHUUEZRQSA-N			10779	4469	8915	17731	963	12404	11174	16167	10236	8979	11616	14207	61975	63913	9398
galacturonic acid	669400	333	131445	85:1361.0 86:2529.0 88:750.0 89:21261.0 90:1552.0 91:867.0 92:119.0 93:210.0 94:209.0 95:161.0 98:431.0 99:2655.0 100:2868.0 101:4337.0 102:5377.0 103:12489.0 104:1477.0 105:12704.0 106:1273.0 107:408.0 109:208.0 110:156.0 111:792.0 112:799.0 113:1649.0 114:4067.0 115:3182.0 116:3013.0 117:3204.0 118:790.0 119:2407.0 120:446.0 121:317.0 122:92.0 125:201.0 126:859.0 127:1358.0 128:1637.0 129:8961.…	441476	C08348	AEMOLEFTQBMNLQ-DTEWXJGMSA-N			3772	5393	3296	3609	2069	3989	3848	2511	3508	3167	1281	3144	6840	1325	8472
galactose	647344	319	18170	86:108.0 88:33.0 98:14.0 103:1972.0 104:148.0 105:366.0 106:62.0 111:15.0 114:33.0 115:4.0 117:1013.0 118:89.0 124:2.0 129:1498.0 130:194.0 131:323.0 133:272.0 143:92.0 145:5.0 147:2937.0 148:388.0 149:260.0 150:41.0 157:927.0 158:88.0 160:1205.0 161:85.0 162:28.0 163:43.0 174:29.0 175:8.0 176:2.0 182:4.0 184:5.0 186:19.0 189:367.0 190:11.0 191:326.0 192:88.0 193:25.0 201:22.0 202:12.0 205:2672.0…	439357	C00984	WQZGKKKJIJFFOK-PHYPRBDBSA-N			284176	272279	255632	313572	177147	208246	228166	199049	1170084	1425203	105359	273660	224050	214857	224552
galactonic acid	690882	292	4706	85:918.0 86:238.0 87:865.0 88:630.0 89:3376.0 90:737.0 91:316.0 95:57.0 96:68.0 97:1011.0 98:413.0 99:1406.0 100:448.0 101:4514.0 102:3806.0 103:26292.0 104:2417.0 105:1403.0 106:36.0 107:255.0 108:13.0 109:160.0 110:149.0 111:353.0 112:80.0 113:956.0 114:440.0 115:1587.0 116:1106.0 117:12863.0 118:1333.0 119:1189.0 124:209.0 125:121.0 126:8.0 127:610.0 128:752.0 129:11296.0 130:3317.0 131:4665.0…	128869	C00880	RGHNJXZEOKUKBD-MGCNEYSASA-N			1386	5833	1115	718	1696	1113	1007	1735	842	821	580	849	1581	998	4721
galactinol	1017580	204	1975	85:17.0 86:36.0 87:46.0 88:20.0 97:9.0 99:36.0 101:68.0 102:47.0 103:1462.0 104:144.0 105:69.0 111:44.0 116:13.0 117:137.0 118:2.0 122:4.0 124:26.0 125:24.0 129:1340.0 130:121.0 131:155.0 133:138.0 136:13.0 139:5.0 140:38.0 142:58.0 143:185.0 144:24.0 147:1783.0 148:114.0 149:219.0 153:11.0 154:30.0 155:123.0 156:92.0 157:109.0 158:4.0 159:4.0 161:42.0 163:14.0 164:29.0 165:10.0 168:5.0 169:376.0…	11727586	C01235	VCWMRQDBPZKXKG-ZNVDUFQESA-N			350596	313083	350416	465113	530127	186942	239970	333577	316778	294219	262067	523936	262580	224114	225022
fumaric acid	390016	245	14755	85:387.0 86:38.0 87:9.0 88:13.0 89:36.0 91:8.0 92:19.0 93:21.0 94:2.0 95:36.0 96:23.0 97:35.0 98:167.0 99:149.0 100:30.0 101:19.0 102:3.0 103:106.0 104:6.0 105:54.0 106:32.0 108:1.0 109:14.0 111:16.0 113:179.0 114:8.0 115:714.0 116:73.0 117:197.0 118:25.0 119:46.0 120:15.0 121:3.0 122:5.0 123:4.0 125:11.0 126:132.0 127:348.0 128:131.0 129:57.0 130:40.0 131:175.0 132:35.0 133:1168.0 134:224.0 135:…	444972	C00122	VZCYOOQTPOCHFL-OWOJBTEDSA-N			9380	8862	8196	6667	8905	2243	14620	10433	3604	6009	3994	4565	7933	6590	7685
fucose	578299	160	3009	85:191.0 89:328.0 91:5.0 98:6.0 100:250.0 101:182.0 103:132.0 105:64.0 107:33.0 117:5349.0 118:423.0 119:197.0 127:28.0 129:429.0 130:344.0 131:248.0 133:363.0 134:138.0 143:112.0 147:658.0 148:60.0 159:12.0 160:926.0 161:309.0 162:4.0 171:31.0 174:36.0 189:39.0 191:27.0 204:79.0 205:9.0 206:19.0 217:28.0 219:124.0 223:10.0 231:37.0 233:151.0 235:13.0 277:238.0 278:54.0 293:13.0 299:12.0 321:80.0…	439650	C02095	SHZGCJCMOBCMKK-FPRJBGLDSA-N			49666	70770	47438	71796	62058	65824	41664	48654	39721	25324	18982	86023	327086	376293	377479
fructose	641863	307	50366	86:65.0 87:79.0 88:18.0 89:2281.0 90:143.0 99:37.0 100:388.0 101:537.0 102:77.0 103:13851.0 104:1258.0 105:563.0 113:20.0 114:164.0 115:201.0 117:1833.0 118:120.0 119:138.0 122:14.0 125:109.0 128:143.0 129:782.0 130:84.0 131:499.0 133:1810.0 134:211.0 135:10.0 136:17.0 142:22.0 143:105.0 145:56.0 147:4583.0 148:705.0 149:481.0 150:25.0 151:26.0 156:27.0 157:146.0 159:19.0 163:118.0 167:3.0 171:41…	439709	C02336	RFSUNEUAIZKAJO-ARQDHWQXSA-N			515160	699451	755977	326240	457583	335294	1256182	476427	271841	402627	504142	343721	333032	300525	227232
flavin adenine	585245	246	196279	85:2357.0 87:2475.0 88:1301.0 89:12303.0 90:1026.0 92:118.0 94:229.0 95:307.0 99:3520.0 101:10235.0 102:21542.0 103:17765.0 104:2304.0 105:1878.0 109:328.0 111:1131.0 112:653.0 113:2747.0 114:289.0 115:3436.0 116:2246.0 117:43134.0 118:4024.0 119:4314.0 120:345.0 125:639.0 127:1422.0 128:38.0 129:11906.0 130:17160.0 131:9945.0 132:1660.0 133:25320.0 134:2887.0 135:1361.0 141:641.0 142:123.0 143:4…	444188		IMGVNJNCCGXBHD-UYBVJOGSSA-O			1165	1334	1474	2088	1056	1310	1172	1145	1366	1603	672	1350	958	1676	1519
ferulic acid	732779	338	14814	85:35.0 86:52.0 87:36.0 88:252.0 89:926.0 90:120.0 91:235.0 92:43.0 93:27.0 94:29.0 95:40.0 97:6.0 98:21.0 99:29.0 101:30.0 102:222.0 103:196.0 104:38.0 105:67.0 106:8.0 107:131.0 109:38.0 110:53.0 111:14.0 112:24.0 114:2.0 115:318.0 116:103.0 117:412.0 118:150.0 119:161.0 120:2.0 121:50.0 122:3.0 123:12.0 125:13.0 126:30.0 127:39.0 128:15.0 129:111.0 130:123.0 131:114.0 132:24.0 133:221.0 134:13…	445858	C01494	KSEBMYQBYZTDHS-HWKANZROSA-N			3948	4444	1444	2311	3457	4379	1663	3837	4421	3278	1410	5227	3163	2618	1017
ethanolamine	342561	174	342038	86:508411.0 88:28566.0 99:6693.0 100:512289.0 101:62585.0 102:63174.0 110:870.0 113:11281.0 114:59828.0 118:5475.0 128:1778.0 130:73986.0 142:1333.0 144:13300.0 146:5880.0 147:215323.0 148:39797.0 149:20456.0 158:12932.0 159:917.0 160:1195.0 172:24497.0 173:5612.0 174:1235261.0 175:240879.0 176:105609.0 188:14968.0 259:382.0 262:21492.0 263:7058.0 264:2941.0 293:2963.0 294:459.0 320:70.0 321:48.0…	700	C00189	HZAXFHJVJLSVMW-UHFFFAOYSA-N			323804	363548	381410	365624	418681	318855	246225	423281	366232	323231	156945	415070	211147	194810	210844
erythronic acid lactone isomer	407495	247	3187	85:740.0 87:3579.0 88:246.0 89:932.0 90:92.0 94:99.0 95:54.0 96:32.0 97:5.0 99:977.0 101:9109.0 102:4849.0 103:6518.0 104:607.0 105:399.0 106:72.0 110:101.0 111:218.0 112:66.0 113:544.0 114:12.0 115:863.0 116:4791.0 117:12.0 118:116.0 119:763.0 120:15.0 121:13.0 122:10.0 123:4.0 124:2.0 125:6.0 126:181.0 129:2421.0 130:1157.0 131:4670.0 132:1087.0 133:3217.0 134:1524.0 135:43.0 136:53.0 137:10.0 …	5325915	C02341	SGMJBNSHAZVGMC-PWNYCUMCSA-N			2472	2860	2551	4361	2638	2362	1737	2404	969	2596	1571	2620	2015	1855	1597
erythritol	471922	217	92	86:57.0 87:443.0 89:682.0 90:92.0 99:480.0 100:41.0 101:1823.0 103:7046.0 104:676.0 105:300.0 106:59.0 109:27.0 111:45.0 113:474.0 115:473.0 116:1861.0 117:6123.0 118:476.0 119:295.0 127:453.0 129:1559.0 130:129.0 131:448.0 133:1902.0 134:216.0 144:53.0 147:9776.0 148:785.0 149:656.0 158:25.0 159:8.0 163:98.0 169:60.0 174:40.0 175:153.0 176:58.0 177:60.0 183:21.0 189:1255.0 190:194.0 191:893.0 19…	222285	C00503	UNXHWFMMPAWVPI-ZXZARUISSA-N			21345	31447	20710	25015	3764	15745	35370	28811	22831	18350	12934	29350	19127	17327	17057
dodecanol	507619	243	12092	85:402.0 86:5.0 87:55.0 88:22.0 89:1221.0 90:28.0 91:164.0 97:1064.0 98:48.0 99:290.0 101:655.0 102:50.0 103:1071.0 104:12.0 105:2.0 107:23.0 110:75.0 111:463.0 113:15.0 115:147.0 116:5.0 117:2.0 119:2.0 124:1.0 125:24.0 127:111.0 129:13.0 130:11.0 132:11.0 133:6.0 143:5.0 147:15.0 166:1.0 171:74.0 175:5.0 185:1.0 188:2.0 189:11.0 190:4.0 191:1.0 220:259.0 221:14.0 223:3.0 243:1615.0 244:323.0 24…	8193	C02277	LQZZUXJYWNFBMV-UHFFFAOYSA-N			51333	10895	35050	34203	13605	41357	38514	14452	18704	27565	19679	15568	23990	19217	18704
D-erythro-sphingosine	859500	204	126903	100:421.0 114:218.0 116:303.0 128:133.0 129:310.0 130:24.0 147:380.0 155:21.0 188:166.0 202:115.0 204:5513.0 205:732.0 206:427.0 223:20.0 345:29.0	5280335	C00319	WWUZIQQURGPMPG-KRWOKUGFSA-N			8026	7180	11925	13046	9175	13755	8483	13412	13285	12290	4287	14146	11932	11782	11782
deoxypentitol	528774	231	33037	87:25.0 89:344.0 90:21.0 101:747.0 102:136.0 103:1141.0 104:17.0 105:123.0 111:54.0 113:68.0 114:9.0 115:1403.0 117:1187.0 118:109.0 119:126.0 128:82.0 129:1844.0 130:246.0 131:413.0 132:69.0 133:945.0 134:35.0 135:18.0 140:208.0 141:182.0 142:167.0 144:282.0 145:197.0 147:3278.0 148:300.0 149:544.0 151:15.0 155:310.0 156:93.0 157:179.0 158:52.0 159:66.0 163:39.0 164:96.0 165:2.0 171:3.0 172:76.0…	270738		FJGNTEKSQVNVTJ-UHFFFAOYSA-N			5701	2918	4636	4900	3475	4204	8414	4339	4336	3853	4314	4289	719	4088	4737
dehydroascorbic acid	633423	173	3163	85:4938.0 86:2632.0 87:3842.0 88:1599.0 89:36445.0 90:4196.0 91:3962.0 92:500.0 94:671.0 95:633.0 96:448.0 97:1730.0 98:1823.0 99:5999.0 100:7321.0 101:16741.0 102:6187.0 103:11081.0 104:1207.0 105:674.0 106:1178.0 108:899.0 109:458.0 110:290.0 111:2948.0 112:1836.0 113:6752.0 114:2900.0 115:4370.0 116:6371.0 117:18187.0 118:3044.0 119:4528.0 120:1247.0 121:273.0 124:120.0 126:1913.0 127:3252.0 1…	440667	C05422	SBJKKFFYIZUCET-JLAZNSOCSA-N			2510	2710	5415	6647	3453	3138	3250	5047	4602	7250	2711	5635	2048	1719	2313
conduritol-beta-epoxide	675635	318	2670	85:36.0 86:264.0 87:119.0 89:71.0 90:3.0 96:4.0 97:45.0 100:25.0 101:25.0 102:89.0 103:1499.0 104:98.0 106:19.0 108:25.0 110:52.0 111:13.0 113:96.0 114:7.0 115:120.0 116:89.0 117:65.0 120:22.0 121:16.0 122:20.0 125:21.0 126:64.0 127:5.0 128:52.0 129:2124.0 130:118.0 131:398.0 132:68.0 133:1415.0 139:13.0 140:24.0 141:13.0 142:4.0 143:397.0 144:106.0 146:101.0 147:5675.0 148:698.0 149:369.0 150:2.…	9989541		ZHMWOVGZCINIHW-SPHYCDKFSA-N			8905	8394	6909	14954	8389	10101	5801	6033	11467	12082	3690	11374	6868	6006	6572
citric acid	617342	273	288	85:108.0 87:167.0 88:92.0 89:136.0 92:58.0 93:86.0 95:193.0 96:108.0 97:78.0 99:605.0 100:143.0 101:223.0 102:92.0 103:336.0 104:70.0 105:58.0 109:24.0 110:55.0 111:256.0 112:15.0 114:87.0 115:639.0 116:312.0 117:522.0 118:105.0 119:62.0 120:32.0 124:17.0 125:53.0 126:49.0 127:177.0 128:22.0 129:915.0 131:952.0 132:92.0 133:1929.0 134:60.0 135:258.0 136:35.0 137:44.0 139:90.0 140:83.0 141:331.0 1…	311	C00158	KRKNYBCHXYNGOX-UHFFFAOYSA-N			118286	63883	87148	33109	110796	78182	88111	189799	45806	38086	103503	88186	109658	108875	108735
cerotinic acid	1033286	145	17982	85:1295.0 86:158.0 88:1.0 89:242.0 91:67.0 93:95.0 95:1309.0 96:191.0 97:1943.0 98:1236.0 99:444.0 101:240.0 102:74.0 104:114.0 105:273.0 106:1.0 108:119.0 109:514.0 111:676.0 112:371.0 113:1.0 114:1.0 115:99.0 116:520.0 117:19706.0 118:1850.0 119:625.0 120:16.0 121:455.0 122:38.0 123:291.0 124:92.0 125:288.0 129:8151.0 130:948.0 131:2365.0 132:8532.0 133:1938.0 134:337.0 135:577.0 136:86.0 137:2…	10469		XMHIUKTWLZUKEX-UHFFFAOYSA-N			6033	1870	1791	2320	2694	4757	1212	3012	4071	4036	1720	4160	6485	4083	4993
catechin	985007	368	102846	85:227.0 86:64.0 88:161.0 89:349.0 91:385.0 92:102.0 93:83.0 94:49.0 95:179.0 97:175.0 99:216.0 100:167.0 102:133.0 103:1110.0 105:498.0 106:55.0 107:105.0 109:168.0 110:59.0 112:63.0 115:405.0 116:50.0 118:83.0 119:388.0 120:73.0 121:178.0 122:8.0 123:54.0 124:48.0 125:119.0 127:36.0 128:67.0 129:576.0 130:62.0 131:731.0 132:41.0 133:1697.0 134:207.0 135:351.0 136:92.0 137:92.0 139:62.0 141:101.…	9064	C06562	PFTAWBLQPZVEMU-DZGCQCFKSA-N			441699	454146	511715	637330	523789	464146	357202	530226	540983	393971	159735	384752	402390	460006	417701
caproic acid	224373	173	126391	87:22.0 88:53.0 99:32.0 103:2.0 105:13.0 108:4.0 109:2.0 110:10.0 111:25.0 112:6.0 115:2.0 116:183.0 117:1267.0 118:96.0 119:10.0 125:2.0 129:242.0 130:3.0 131:565.0 132:309.0 133:26.0 137:1.0 138:26.0 143:37.0 145:103.0 147:368.0 148:20.0 149:2.0 150:3.0 151:7.0 155:5.0 159:13.0 161:33.0 162:1.0 167:4.0 173:1234.0 174:148.0 175:49.0 177:53.0 178:11.0 179:10.0 180:2.0 185:1.0 187:1.0 188:1.0 190:…	8892	C01585	FUZZWVXGSFPDMH-UHFFFAOYSA-N			7632	11438	12515	11636	8434	10920	5706	10855	24584	13411	6662	14388	10099	13294	15329
capric acid	452386	229	50422	86:58.0 95:73.0 100:128.0 115:203.0 116:59.0 117:1692.0 118:22.0 129:683.0 130:12.0 131:212.0 132:438.0 143:65.0 145:173.0 154:11.0 168:16.0 183:18.0 185:23.0 201:16.0 229:495.0 230:98.0 243:21.0 244:16.0 338:5.0 388:4.0 421:13.0 452:4.0 478:6.0 497:4.0	2969	C01571	GHVNFZFCNZKVNT-UHFFFAOYSA-N			1581	1872	1361	3456	1546	1834	1139	2526	2698	497	1393	2337	2522	1858	1882
butyrolactam	277199	142	2047	85:20.0 86:58.0 88:236.0 89:101.0 99:89.0 100:965.0 101:112.0 102:36.0 107:15.0 108:64.0 110:113.0 112:60.0 113:20.0 114:80.0 115:83.0 116:36.0 134:97.0 140:21.0 142:4184.0 143:458.0 144:89.0 155:31.0 156:217.0 157:779.0 158:23.0 173:153.0 184:27.0 185:7.0 199:33.0 213:132.0 302:10.0 306:2.0 314:3.0	12025		HNJBEVLQSNELDL-UHFFFAOYSA-N			10154	10997	10310	11958	9972	10485	8984	10136	8944	9902	5642	11616	7753	5989	6952
beta-sitosterol	1128225	129	3174	85:2766.0 86:101.0 87:57.0 89:458.0 91:5648.0 92:1009.0 93:4837.0 94:854.0 95:7005.0 96:398.0 97:1583.0 98:69.0 99:841.0 101:529.0 102:39.0 103:648.0 104:289.0 105:5798.0 106:1007.0 107:5082.0 108:945.0 109:3381.0 110:296.0 111:1228.0 112:109.0 113:310.0 114:25.0 115:1041.0 116:430.0 117:2402.0 118:725.0 119:4929.0 120:2342.0 121:4665.0 122:692.0 123:1370.0 124:121.0 125:512.0 127:195.0 128:627.0…	222284	C01753	KZJWDPNRJALLNS-VJSFXXLFSA-N			209174	196790	163629	270942	170706	238144	92643	162263	230165	205483	101896	199864	261764	223768	200859
beta-gentiobiose	965404	160	4831	85:106.0 87:19.0 89:512.0 94:69.0 95:27.0 99:17.0 100:282.0 101:406.0 102:90.0 103:1363.0 105:108.0 107:68.0 108:17.0 111:2.0 112:45.0 113:84.0 114:145.0 115:162.0 116:330.0 117:877.0 118:149.0 119:29.0 126:7.0 128:94.0 129:1369.0 130:311.0 131:848.0 132:5.0 133:63.0 134:76.0 138:35.0 139:27.0 142:229.0 143:213.0 144:56.0 145:29.0 147:1562.0 148:104.0 149:89.0 152:16.0 153:289.0 154:96.0 155:257.…	441422	C08240	DLRVVLDZNNYCBX-LIZSDCNHSA-N			106376	119729	112054	112994	106929	120328	75478	128622	101816	76230	58627	109771	91478	82194	89970
beta-alanine	435564	248	148	85:228.0 86:3117.0 87:240.0 90:32.0 93:32.0 95:19.0 99:386.0 100:1891.0 101:337.0 102:313.0 103:237.0 104:118.0 107:63.0 113:116.0 114:91.0 117:236.0 119:17.0 120:39.0 129:105.0 130:635.0 133:1533.0 134:301.0 135:92.0 137:24.0 142:51.0 146:224.0 147:2196.0 148:431.0 160:346.0 161:56.0 162:41.0 164:29.0 168:16.0 170:19.0 172:67.0 173:3.0 174:3380.0 175:583.0 176:292.0 181:27.0 187:19.0 188:94.0 18…	239	C00099	UCMIRNVEIXFBKS-UHFFFAOYSA-N			6672	5332	5588	5189	10341	5401	5697	8219	6228	6738	2385	11725	3990	4384	4380
behenic acid	919293	117	382585	85:11890.0 86:2544.0 87:2201.0 88:1513.0 89:7696.0 90:1046.0 91:2233.0 92:441.0 93:5573.0 94:900.0 95:14418.0 96:3012.0 97:16137.0 98:12358.0 99:6110.0 100:991.0 101:4097.0 102:1076.0 103:5732.0 104:438.0 105:4818.0 106:563.0 107:2851.0 108:452.0 109:4899.0 110:854.0 111:8062.0 112:2863.0 113:1469.0 114:413.0 115:2419.0 116:11506.0 117:208933.0 118:19530.0 119:8601.0 120:435.0 121:2720.0 122:370.…	8215	C08281	UKMSUNONTOPOIO-UHFFFAOYSA-N			10423	11209	10309	8028	8030	8591	3346	13848	13691	8968	13370	12490	15364	14730	9380
azelaic acid	610551	317	329430	85:4024.0 86:2227.0 87:401.0 88:1079.0 91:2867.0 92:570.0 93:4066.0 95:1934.0 96:1467.0 97:5855.0 98:622.0 99:2736.0 100:1110.0 101:2248.0 102:958.0 103:2192.0 107:1747.0 109:3699.0 110:597.0 111:502.0 115:1692.0 116:8089.0 117:17525.0 118:1600.0 119:528.0 121:182.0 123:1047.0 124:1220.0 125:894.0 127:1231.0 129:16201.0 130:2038.0 131:3372.0 133:6408.0 135:1140.0 136:356.0 142:187.0 143:2329.0 14…	19347555	C08261	BDJRBEYXGGNYIS-UHFFFAOYSA-N			810	867	757	1289	794	1998	585	1010	1040	1053	703	1267	806	639	1102
ascorbic acid	672898	332	238	85:135.0 86:135.0 87:248.0 88:196.0 89:2251.0 90:375.0 93:178.0 94:27.0 95:496.0 97:119.0 98:172.0 99:591.0 101:524.0 103:2328.0 104:337.0 105:143.0 109:261.0 111:411.0 113:46.0 114:178.0 115:672.0 116:132.0 117:10603.0 118:841.0 119:893.0 121:54.0 122:44.0 123:190.0 125:19.0 126:59.0 127:410.0 128:196.0 131:1308.0 132:231.0 133:3873.0 134:556.0 135:442.0 136:83.0 137:62.0 139:81.0 140:1.0 141:15…	54670067	C00072	CIWBSHSKHKDKBQ-JLAZNSOCSA-N			12323	12194	10622	14513	11863	11967	7883	11148	11494	11437	3417	10833	9027	8850	9192
arbutin	895725	254	124414	85:489.0 87:305.0 89:760.0 91:970.0 92:139.0 93:106.0 95:284.0 97:182.0 99:340.0 100:187.0 101:1089.0 103:5465.0 104:552.0 105:468.0 107:83.0 109:551.0 110:264.0 111:281.0 112:272.0 113:334.0 115:334.0 117:2573.0 118:214.0 119:352.0 120:46.0 121:112.0 122:48.0 123:206.0 125:58.0 129:5394.0 130:664.0 131:1358.0 133:2352.0 134:226.0 135:436.0 136:69.0 137:95.0 138:191.0 139:244.0 141:216.0 145:202.…			BJRNKVDFDLYUGJ-RMPHRYRLSA-N			32354	36593	50923	87113	35716	57489	27155	43267	62448	69186	18128	80210	32897	31873	29105
arabitol	572730	103	372446	85:2758.0 86:4683.0 87:26719.0 88:20528.0 89:94804.0 90:8837.0 91:4319.0 92:198.0 93:1522.0 94:1182.0 95:1716.0 96:1028.0 97:4394.0 98:1729.0 99:13063.0 101:82300.0 102:12277.0 103:768966.0 104:72837.0 105:37260.0 106:1894.0 107:887.0 108:631.0 109:712.0 110:1444.0 111:10142.0 112:1314.0 113:15331.0 114:2643.0 115:20427.0 116:31686.0 117:283728.0 118:29774.0 119:27052.0 120:1795.0 121:1501.0 122:…	94154	C01904	HEBKCHPVOIAQTA-QWWZWVQMSA-N			15956	20031	15590	24220	20979	23341	5206	32892	29103	33956	26420	34435	29965	37527	38253
alpha-ketoglutarate	507392	198	294	85:208.0 87:154.0 89:4657.0 90:84.0 91:201.0 94:49.0 98:155.0 99:133.0 101:112.0 102:113.0 103:234.0 110:90.0 112:1654.0 113:180.0 114:75.0 115:296.0 118:19.0 125:56.0 126:615.0 128:246.0 129:323.0 131:331.0 133:422.0 135:87.0 142:51.0 143:95.0 144:23.0 145:67.0 147:7768.0 148:1161.0 149:693.0 152:14.0 154:243.0 155:35.0 156:3139.0 157:398.0 158:205.0 159:36.0 160:14.0 161:16.0 163:100.0 170:1125…	51	C00026	KPGXRSRHYNQIFN-UHFFFAOYSA-N			893	812	804	849	1157	1226	771	845	1520	804	629	1010	1507	1327	1251
alanine	243971	116	34178	85:333.0 86:2106.0 87:467.0 88:280.0 89:5.0 90:53.0 91:138.0 92:168.0 93:215.0 94:1333.0 95:43.0 96:6.0 98:74.0 99:48.0 100:4652.0 101:1063.0 102:1419.0 103:3674.0 104:501.0 105:328.0 106:3.0 108:75.0 109:236.0 110:175.0 112:94.0 114:926.0 115:860.0 116:84295.0 117:10442.0 118:3671.0 119:545.0 120:126.0 121:65.0 122:38.0 123:90.0 124:32.0 125:42.0 126:107.0 127:278.0 128:1618.0 129:278.0 130:1195…	5950	C00041	QNAYBMKLOCPYGJ-REOHCLBHSA-N			21740	17584	14969	10704	23377	8604	39498	8243	9910	7368	16012	8513	6191	6297	7436
adipic acid	474435	111	125	85:2037.0 86:2852.0 87:703.0 88:641.0 89:904.0 90:27.0 91:64.0 92:167.0 93:122.0 94:58.0 95:60.0 96:79.0 97:441.0 99:4029.0 100:405.0 101:502.0 102:524.0 105:259.0 107:59.0 108:26.0 109:187.0 110:362.0 111:58622.0 112:3744.0 113:1086.0 114:171.0 115:1351.0 116:2824.0 117:11244.0 118:1055.0 119:703.0 120:50.0 123:10.0 124:19.0 125:208.0 126:57.0 128:229.0 129:9390.0 130:2687.0 131:1989.0 132:910.0…	196	C06104	WNLRTRBMVRJNCN-UHFFFAOYSA-N			3653	3133	1951	3406	1913	2636	1345	2252	2988	2242	1702	2152	2371	1344	1987
adenosine	918039	236	290	85:353.0 86:112.0 89:208.0 95:41.0 98:54.0 99:460.0 100:35.0 101:439.0 102:88.0 103:2553.0 104:236.0 105:110.0 109:159.0 111:217.0 113:236.0 115:473.0 116:284.0 117:469.0 119:106.0 120:28.0 126:71.0 129:719.0 130:43.0 131:300.0 132:124.0 133:869.0 134:103.0 135:182.0 136:60.0 137:23.0 138:121.0 139:38.0 142:46.0 143:329.0 144:32.0 145:58.0 147:1456.0 148:317.0 149:320.0 151:23.0 153:75.0 155:49.0…	60961	C00212	OIRDTQYFTABQOQ-KQYNXXCUSA-N			2680	1430	1672	2446	1286	1455	1675	1193	2915	1582	1454	1154	1323	1017	1212
aconitic acid	586815	229	29	85:823.0 86:194.0 87:662.0 88:337.0 89:711.0 90:119.0 91:200.0 93:1018.0 94:224.0 95:1683.0 96:1733.0 97:6038.0 98:1174.0 99:1242.0 100:178.0 101:600.0 102:310.0 103:1548.0 104:242.0 105:655.0 107:259.0 108:172.0 109:241.0 110:546.0 111:911.0 112:674.0 113:694.0 115:1207.0 116:392.0 117:2280.0 118:273.0 119:1093.0 120:174.0 121:326.0 122:39.0 123:487.0 124:76.0 125:294.0 126:191.0 127:456.0 128:2…	643757	C00417	GTZCVFVGUGFEME-IWQZZHSRSA-N			1272	1082	1236	1144	1004	1355	1517	1125	929	1090	1430	1385	1127	1360	1254
6-deoxyglucose	573663	117	85102	85:1382.0 86:894.0 87:839.0 88:367.0 89:5317.0 90:407.0 91:305.0 95:82.0 96:126.0 97:153.0 98:192.0 99:868.0 100:2605.0 101:2321.0 102:1181.0 103:5551.0 104:561.0 105:2504.0 106:242.0 107:146.0 108:149.0 109:70.0 110:120.0 111:250.0 112:338.0 113:533.0 114:1548.0 115:2124.0 116:1054.0 117:90320.0 118:9236.0 119:3823.0 120:191.0 121:50.0 122:58.0 124:133.0 125:98.0 126:205.0 127:703.0 128:771.0 12…	441480	C08352	PNNNRSAQSRJVSB-JGWLITMVSA-N			37279	61649	46874	74121	40792	54763	30484	56026	56113	3036	31897	70892	322724	376121	379066
6-deoxyglucitol	599776	117	92567	94:11.0 100:304.0 101:76.0 103:2237.0 104:125.0 105:2.0 107:17.0 108:3.0 111:91.0 115:237.0 117:14612.0 118:1585.0 119:511.0 124:19.0 127:18.0 129:2609.0 130:154.0 131:1029.0 135:11.0 137:25.0 143:739.0 144:63.0 147:5826.0 148:730.0 149:493.0 155:60.0 157:862.0 158:33.0 159:42.0 163:53.0 167:1.0 170:9.0 171:189.0 177:6.0 179:2.0 185:7.0 189:507.0 190:95.0 191:62.0 193:8.0 195:3.0 196:1.0 201:696.…	151266		SKCKOFZKJLZSFA-JGWLITMVSA-N			17788	7739	19678	22741	3280	22346	10693	20205	17262	14180	10267	23183	16641	10635	7006
5-methoxytryptamine	864466	174	284	86:1203.0 87:181.0 88:92.0 90:42.0 92:34.0 95:29.0 100:628.0 101:65.0 102:70.0 105:49.0 110:34.0 112:50.0 115:39.0 117:67.0 118:56.0 121:41.0 124:29.0 130:92.0 131:54.0 132:79.0 135:54.0 150:31.0 155:19.0 158:46.0 159:57.0 172:30.0 174:4979.0 175:869.0 176:366.0 202:87.0 204:33.0 205:32.0 206:13.0 211:21.0 212:12.0 217:34.0 218:39.0 222:50.0 223:29.0 225:17.0 228:24.0 231:36.0 233:36.0 235:29.0 2…	1833	C05659	JTEJPPKMYBDEMY-UHFFFAOYSA-N			46997	48753	63510	93479	88253	129504	58707	96035	118455	68662	36498	93395	110924	157517	178588
5-Hydroxymethyl-2-furancarboxaldehyde	423375	138	102740	86:48.0 89:999.0 90:102.0 92:70.0 93:54.0 94:121.0 95:171.0 97:108.0 98:57.0 99:15.0 101:101.0 106:647.0 107:342.0 108:97.0 109:57.0 110:74.0 111:509.0 112:95.0 113:28.0 116:59.0 121:35.0 122:264.0 123:296.0 124:55.0 125:74.0 129:56.0 136:63.0 138:2813.0 139:252.0 141:56.0 151:37.0 152:536.0 153:162.0 154:119.0 155:16.0 156:50.0 167:47.0 168:734.0 169:367.0 170:83.0 172:66.0 180:163.0 181:37.0 18…	237332	C11101	NOEGNKMFWQHSLB-UHFFFAOYSA-N			152844	178221	184646	100264	125433	99738	426176	104826	78610	139024	271931	92729	87168	82365	77528
4-hydroxybenzoic acid	537290	267	370159	85:7245.0 86:1061.0 87:2212.0 88:845.0 89:17207.0 90:7260.0 91:31159.0 92:14537.0 93:6616.0 94:931.0 95:4812.0 96:2700.0 97:2166.0 98:584.0 99:1678.0 100:1577.0 101:611.0 103:9171.0 104:11271.0 105:12053.0 106:1893.0 107:4059.0 108:796.0 109:2160.0 111:2900.0 112:719.0 113:519.0 114:171.0 115:2782.0 116:551.0 117:3740.0 118:3300.0 119:6558.0 120:3899.0 121:7180.0 122:5034.0 123:2732.0 124:447.0 1…	135	C00156	FJKROLUGYXJWQN-UHFFFAOYSA-N			16929	26353	19822	26678	19182	33278	18155	27180	26691	32132	12281	40378	16339	16222	13366
4-aminobutyric acid	488730	304	1842	85:2931.0 86:36127.0 88:1868.0 89:824.0 90:367.0 91:21.0 92:27.0 93:383.0 94:61.0 95:474.0 96:289.0 97:896.0 98:1926.0 99:2673.0 100:23284.0 101:4921.0 102:4701.0 103:1487.0 104:675.0 105:715.0 106:24.0 107:184.0 108:203.0 109:406.0 110:716.0 111:335.0 112:2089.0 113:1884.0 114:3527.0 115:3212.0 116:3300.0 117:5040.0 118:1020.0 119:1376.0 120:195.0 121:54.0 122:39.0 123:55.0 124:233.0 125:201.0 1…	119	C00334	BTCSSZJGUNDROE-UHFFFAOYSA-N			24204	30244	23784	21055	31942	20143	40868	29836	19247	22480	9820	31451	15070	2860	11310
3-hydroxybutyric acid	278632	191	145501	85:131.0 87:1473.0 88:6305.0 89:1090.0 90:120.0 91:68.0 95:57.0 96:101.0 98:187.0 99:1246.0 100:1071.0 101:2671.0 102:480.0 105:239.0 112:38.0 113:234.0 115:3134.0 116:423.0 117:29724.0 118:3054.0 119:1586.0 121:72.0 125:44.0 128:13.0 129:229.0 130:4368.0 131:1815.0 132:261.0 133:5879.0 134:969.0 135:540.0 139:28.0 141:46.0 144:210.0 146:140.0 147:40360.0 148:7485.0 149:5505.0 150:460.0 151:191.0…	92135	C01089	WHBMMWSBFZVSSR-GSVOUGTGSA-N			1676	2401	1510	5301	1423	1780	1014	2056	2012	2292	1239	2262	1357	1495	2060
3,6-anhydro-D-glucose	587617	231	16782	85:2651.0 86:1379.0 87:3019.0 88:1300.0 89:25434.0 90:2285.0 91:1263.0 92:115.0 93:1209.0 94:1132.0 95:14971.0 96:2959.0 97:1423.0 98:4240.0 99:2750.0 100:4219.0 101:13829.0 102:3622.0 103:44711.0 104:3976.0 105:12724.0 106:1217.0 107:496.0 108:481.0 109:489.0 110:986.0 111:2472.0 112:1444.0 113:1770.0 114:861.0 115:3085.0 116:3634.0 117:19400.0 118:2401.0 119:3534.0 120:636.0 121:1755.0 122:419.…	16069993	C06478	WZYRMLAWNVOIEX-SLPGGIOYSA-N			5481	4056	5822	4448	2600	2869	2681	3159	2910	3321	2074	3230	5369	6267	6507
3,6-anhydro-D-galactose	588886	231	102714	85:192.0 86:135.0 87:64.0 88:217.0 89:4369.0 90:296.0 91:328.0 92:63.0 93:171.0 94:173.0 95:2021.0 96:291.0 97:94.0 98:608.0 99:333.0 100:613.0 101:2506.0 102:326.0 103:4816.0 104:494.0 105:1735.0 106:197.0 107:96.0 108:60.0 109:30.0 110:66.0 111:435.0 112:245.0 113:287.0 114:68.0 115:458.0 116:580.0 117:2812.0 118:407.0 119:583.0 121:215.0 122:64.0 123:123.0 124:59.0 125:104.0 126:952.0 127:256.…	16069996	C06474	WZYRMLAWNVOIEX-BGPJRJDNSA-N			3300	6437	6285	3309	3763	4514	11344	4651	3577	4446	2172	3825	4077	2818	4363
3,4-dihydroxyphenylacetic acid	625046	179	32204	85:28.0 86:102.0 87:5.0 89:63.0 90:1.0 91:12.0 92:18.0 93:81.0 94:23.0 95:280.0 96:478.0 97:77.0 98:92.0 99:17.0 104:301.0 107:13.0 109:25.0 110:87.0 117:55.0 118:1.0 119:43.0 128:53.0 131:119.0 133:167.0 134:73.0 135:15.0 136:3.0 137:13.0 139:14.0 141:26.0 147:242.0 149:231.0 151:8.0 161:17.0 163:69.0 164:8.0 166:5.0 169:14.0 170:12.0 171:29.0 176:18.0 177:22.0 178:57.0 179:2366.0 180:295.0 181:…	547	C01161	CFFZDZCDUFSOFZ-UHFFFAOYSA-N			12255	26527	17873	20422	3342	26005	6880	26266	22454	23714	12970	32918	2972	10254	11151
3,4-dihydroxycinnamic acid	748847	219	16546	85:1780.0 86:20.0 87:24.0 88:1684.0 89:4807.0 90:388.0 91:739.0 92:85.0 93:33.0 94:49.0 95:700.0 97:1259.0 98:647.0 99:413.0 101:816.0 102:963.0 103:1469.0 104:421.0 105:1160.0 106:113.0 107:601.0 108:95.0 109:940.0 110:199.0 111:64.0 112:116.0 113:303.0 115:3976.0 116:1253.0 117:4062.0 118:601.0 119:1232.0 120:1.0 121:523.0 122:115.0 123:7.0 124:63.0 125:51.0 127:648.0 128:467.0 129:1690.0 130:4…	689043	C01197	QAIPRVGONGVQAS-DUXPYHPUSA-N			11126	12075	11202	14833	10337	13629	6064	14590	14057	11358	5980	13220	8336	8977	9446
3,4-dihydroxybenzoic acid	620200	193	16806	89:294.0 91:134.0 93:177.0 95:84.0 99:23.0 101:1.0 105:717.0 106:34.0 107:597.0 108:35.0 109:434.0 110:81.0 114:14.0 116:27.0 119:71.0 121:58.0 122:15.0 123:183.0 127:81.0 130:7.0 133:258.0 134:189.0 135:133.0 136:54.0 137:2319.0 138:203.0 139:29.0 141:73.0 142:124.0 143:107.0 144:53.0 149:8.0 151:103.0 152:33.0 157:315.0 160:202.0 161:42.0 162:19.0 163:433.0 164:141.0 165:2034.0 166:273.0 167:72…	72	C00230	YQUVCSBJEUQKSH-UHFFFAOYSA-N			69691	89441	96150	136729	144993	182815	85613	143205	154496	161560	122338	194053	164851	201253	221525
2-monoolein	941794	129	84531	85:232.0 87:211.0 88:58.0 89:445.0 91:823.0 92:128.0 93:916.0 94:354.0 95:1224.0 96:388.0 97:243.0 98:63.0 99:217.0 101:1656.0 102:154.0 103:14217.0 104:1223.0 105:902.0 107:335.0 108:145.0 109:395.0 110:153.0 111:102.0 112:25.0 113:248.0 114:23.0 115:284.0 116:221.0 117:652.0 119:259.0 120:34.0 121:300.0 122:28.0 123:125.0 124:65.0 125:21.0 128:32.0 129:8919.0 130:1155.0 131:1582.0 132:109.0 133…	5319879		UPWGQKDVAURUGE-KTKRTIGZSA-N			34066	28820	42240	36925	4232	39165	5589	30295	27608	6147	18800	22279	32854	29223	26860
2-ketoadipic acid	331841	100	106429	86:100.0 89:3200.0 90:80.0 91:164.0 96:632.0 97:157.0 98:88.0 99:519.0 100:3977.0 101:130.0 102:35.0 103:128.0 113:15.0 119:659.0 126:23.0 127:1733.0 128:221.0 130:144.0 131:88.0 135:18.0 142:11.0 145:19.0 147:308.0 148:58.0 152:11.0 156:9.0 163:14.0 164:20.0 168:16.0 169:15.0 183:18.0 185:15.0 202:9.0 208:17.0 214:22.0 217:65.0 218:28.0 230:12.0 231:37.0 233:26.0 244:18.0 251:16.0 252:18.0 254:7…	71	C00322	FGSBNBBHOZHUBO-UHFFFAOYSA-N			3694	4412	4885	5297	4289	4488	3061	4327	4886	4764	3759	5474	4550	5704	6148
2-deoxyuridine	348950	155	379168	92:458.0 94:232.0 98:357.0 99:910.0 104:788.0 108:96.0 111:198.0 113:785.0 124:194.0 126:131.0 130:1074.0 138:164.0 139:232.0 143:145.0 146:436.0 150:158.0 154:75.0 155:3016.0 156:449.0 157:599.0 168:110.0 169:3071.0 170:2864.0 183:306.0 186:181.0 271:72.0 272:46.0 296:29.0 304:45.0 317:79.0 327:54.0 331:24.0 362:34.0 372:43.0 379:28.0 385:36.0 394:30.0 399:30.0 416:32.0 425:23.0 452:32.0 483:25.0	13712	C00526	MXHRCPNRJAMMIM-SHYZEUOFSA-N			1322	1484	1073	1510	1364	2052	924	1293	1300	1058	800	1466	2827	1904	1537
2,3-dihydroxypyridine	372944	240	351308	85:661.0 90:182.0 91:342.0 92:647.0 97:134.0 100:225.0 101:209.0 102:67.0 105:95.0 108:236.0 111:215.0 112:225.0 114:170.0 116:105.0 118:36.0 122:211.0 124:85.0 125:159.0 131:256.0 134:294.0 136:77.0 137:281.0 138:29.0 140:111.0 141:150.0 142:79.0 148:161.0 150:636.0 151:129.0 152:657.0 153:64.0 154:52.0 165:110.0 166:780.0 167:242.0 168:514.0 169:32.0 174:44.0 176:21.0 181:117.0 183:52.0 185:99.…	28115		GGOZGYRTNQBSSA-UHFFFAOYSA-N			1795	2183	1985	2099	1439	3960	2254	3186	3617	2570	1963	3198	4094	4530	5421
1-monopalmitin	900644	371	391871	85:3051.0 86:1.0 87:217.0 88:553.0 89:1186.0 90:64.0 94:336.0 95:2990.0 96:87.0 97:1809.0 98:645.0 99:1106.0 101:5698.0 102:617.0 103:4448.0 104:447.0 105:471.0 109:1280.0 111:804.0 113:313.0 115:292.0 116:2917.0 117:3820.0 118:377.0 121:148.0 122:78.0 123:492.0 124:109.0 125:482.0 128:132.0 129:4579.0 130:808.0 131:2381.0 132:1264.0 133:2875.0 134:541.0 135:93.0 137:479.0 138:41.0 139:102.0 140:…	14900		QHZLMUACJMDIAE-UHFFFAOYSA-N			6787	5851	7236	8159	4959	6371	5023	4180	8361	5262	4335	4602	4688	4613	4273
1-monoolein	952623	129	7508	85:574.0 86:56.0 87:709.0 88:73.0 89:747.0 90:78.0 91:856.0 92:154.0 93:1294.0 94:580.0 95:2736.0 96:562.0 97:1409.0 98:812.0 99:402.0 100:65.0 101:4011.0 102:484.0 103:7050.0 104:595.0 105:742.0 106:156.0 107:791.0 108:155.0 109:1114.0 110:270.0 111:672.0 112:115.0 113:214.0 114:24.0 115:456.0 116:1288.0 117:2529.0 118:273.0 119:379.0 120:122.0 121:917.0 122:237.0 123:624.0 124:165.0 125:190.0 1…	5283468		RZRNAYUHWVFMIP-KTKRTIGZSA-N			40155	36941	50224	21228	43491	43633	40943	20755	18570	11623	31753	24076	29026	32717	23148
1,2-anhydro-myo-inositol	651472	318	16557	85:790.0 86:151.0 87:1307.0 88:8.0 90:93.0 91:58.0 95:305.0 97:198.0 98:63.0 99:708.0 101:2297.0 102:106.0 103:7446.0 104:505.0 109:190.0 110:51.0 111:679.0 112:156.0 113:813.0 116:1127.0 119:592.0 124:1.0 125:76.0 126:241.0 127:578.0 129:10841.0 131:3376.0 132:122.0 133:9161.0 134:1359.0 135:672.0 137:79.0 138:32.0 139:109.0 140:12.0 141:333.0 142:319.0 143:2694.0 144:231.0 146:121.0 147:30131.0…	119054		ZHMWOVGZCINIHW-FTYOSCRSSA-N			35167	44463	41639	35662	42273	39576	30723	49604	33202	56395	37536	36925	30568	33665	38921
530733	387722	212	530733	88:4994.0 89:102652.0 90:9222.0 91:6110.0 93:4404.0 94:1747.0 95:4505.0 100:3866.0 103:10371.0 104:1355.0 106:1203.0 107:1804.0 108:985.0 109:1635.0 110:14708.0 111:2301.0 115:1566.0 116:656.0 119:9986.0 120:960.0 121:543.0 122:578.0 124:141.0 125:1255.0 128:536.0 129:888.0 131:7958.0 132:923.0 136:4160.0 137:401.0 138:3528.0 139:898.0 144:623.0 145:472.0 151:2126.0 152:1101.0 154:4216.0 156:880.…						1730	470	797	1502	360	1194	4031	774	1216	1609	3692	691	871	548	833
530130	973299	375	530130	85:3122.0 86:938.0 87:163.0 88:1009.0 89:5451.0 90:1495.0 91:3651.0 93:1726.0 94:699.0 95:3972.0 96:552.0 97:901.0 99:2766.0 101:7458.0 102:862.0 103:20871.0 104:1970.0 105:2803.0 106:636.0 107:210.0 108:662.0 110:292.0 111:1389.0 113:2539.0 114:454.0 115:5977.0 116:4657.0 117:9430.0 119:6118.0 121:211.0 123:1827.0 126:128.0 127:1288.0 128:1342.0 129:19772.0 130:1404.0 131:8693.0 132:2270.0 133:1…						69497	68136	78842	65160	74998	57093	28381	69371	40780	34183	19965	48703	49315	42606	41395
530129	1108194	487	530129	85:17594.0 86:13362.0 87:22972.0 88:6462.0 89:15256.0 90:4028.0 91:9227.0 92:3956.0 93:8783.0 94:1078.0 95:2521.0 97:6981.0 98:13872.0 99:17357.0 100:3717.0 101:14264.0 102:6019.0 103:43539.0 104:8436.0 105:24334.0 106:4196.0 107:12741.0 108:1940.0 109:6400.0 110:7631.0 111:6562.0 112:3289.0 113:12878.0 114:6424.0 115:40024.0 116:6423.0 117:22357.0 118:5721.0 119:25421.0 120:6388.0 121:10291.0 12…						168988	231567	184221	272198	187254	205503	103040	209991	225918	201897	88939	231922	195084	163390	157582
530107	450106	165	530107	92:844.0 93:17667.0 94:1702.0 95:8428.0 101:7686.0 102:1420.0 103:3917.0 104:286.0 105:243.0 115:6243.0 116:21885.0 117:4213.0 119:747.0 121:189.0 130:834.0 138:140.0 139:345.0 147:10812.0 148:2375.0 149:1699.0 153:490.0 159:517.0 163:3174.0 164:753.0 165:30263.0 166:3341.0 167:11049.0 168:1492.0 169:1593.0 171:1523.0 177:1078.0 178:109.0 181:150.0 185:269.0 187:114.0 228:361.0 230:199.0 241:114.…						23084	20964	21128	25491	14120	25669	11268	22271	26403	24443	6997	27493	20896	20141	17396
530106	654829	182	530106	85:1299.0 86:2307.0 87:5877.0 88:739.0 89:18808.0 90:3353.0 91:14584.0 92:3326.0 93:4866.0 94:15105.0 95:7810.0 96:2667.0 97:1757.0 98:1726.0 99:2345.0 101:8590.0 102:8432.0 103:17665.0 104:1466.0 105:6014.0 106:3723.0 107:8770.0 108:24698.0 109:8666.0 110:12147.0 111:3196.0 112:1212.0 113:3882.0 114:293.0 115:4712.0 116:4553.0 117:27191.0 118:6974.0 119:7078.0 120:4603.0 121:2977.0 122:9316.0 12…						9908	12989	11939	11338	6766	19552	5273	8103	15578	13375	5237	6634	6632	6116	6499
530105	1168055	160	530105	85:5899.0 86:4195.0 87:3987.0 88:2357.0 89:51231.0 90:5382.0 95:1003.0 97:4260.0 98:1700.0 99:3946.0 100:18002.0 101:20582.0 102:11811.0 103:25933.0 104:2310.0 105:36118.0 106:4587.0 107:2206.0 108:822.0 110:1852.0 111:1868.0 112:2538.0 113:1702.0 114:5811.0 115:4976.0 116:6124.0 117:23929.0 118:3266.0 119:2753.0 124:897.0 125:278.0 126:1220.0 127:4048.0 128:3248.0 129:39590.0 130:12534.0 131:137…						38414	55249	49328	88517	42026	48097	26775	54284	72766	62859	2086	76156	44509	34216	37174
530104	695437	456	530104	85:487.0 88:526.0 89:4515.0 97:363.0 101:680.0 102:652.0 103:3282.0 105:3045.0 106:381.0 107:228.0 115:2108.0 117:289.0 119:1496.0 120:289.0 121:232.0 131:4547.0 132:209.0 133:9423.0 134:1403.0 135:1275.0 139:110.0 141:154.0 145:416.0 146:392.0 147:35385.0 148:5633.0 149:2627.0 150:516.0 151:301.0 160:406.0 162:88.0 163:3252.0 164:207.0 165:848.0 170:143.0 175:195.0 176:471.0 177:173.0 178:351.0 …						12767	15130	16237	11230	6080	21973	10652	18260	15153	15613	8426	14185	12318	10486	11091
530103	181402	93	530103	85:8874.0 88:994.0 91:1006.0 92:2248.0 93:262264.0 94:9939.0 95:85325.0 96:1605.0 105:305.0 106:874.0 107:96460.0 108:2011.0 109:22713.0 112:2920.0 120:341.0 121:227.0 123:141.0 124:983.0 140:4030.0 141:6730.0 160:3186.0 168:5427.0 169:361.0 186:1305.0 187:201.0 193:263.0 197:267.0 199:275.0 201:1570.0 202:278.0 220:177.0 312:54.0 323:64.0 327:122.0 405:55.0						170299	127353	240075	161473	123350	160161	79639	164182	58044	95604	7421	174601	147612	55276	50893
530102	977360	395	530102	85:770.0 86:1309.0 87:2761.0 88:673.0 89:7966.0 91:8221.0 92:4587.0 93:11872.0 94:8003.0 95:6471.0 97:3032.0 98:1529.0 99:3067.0 100:516.0 101:8243.0 102:487.0 103:15780.0 104:846.0 105:5464.0 106:5243.0 107:16274.0 108:3621.0 109:9610.0 110:2022.0 111:1772.0 112:830.0 113:2124.0 115:3358.0 116:4175.0 117:18771.0 118:5065.0 119:7599.0 120:5278.0 121:2303.0 122:2643.0 123:1676.0 124:2193.0 125:191…						8802	11613	10188	11416	11290	15075	8735	13196	10343	3012	5300	11248	8761	9541	8575
530099	621368	297	530099	85:2244.0 86:2762.0 87:1326.0 89:5500.0 90:805.0 91:4073.0 92:850.0 95:1626.0 96:484.0 97:550.0 98:301.0 99:1137.0 100:4106.0 101:1843.0 104:152.0 105:1978.0 107:3205.0 108:415.0 109:1197.0 110:815.0 111:510.0 112:815.0 113:641.0 114:467.0 116:1333.0 119:3521.0 120:1018.0 121:1243.0 123:612.0 125:185.0 126:843.0 127:500.0 128:1492.0 130:2269.0 131:3394.0 132:387.0 133:2074.0 136:668.0 140:1129.0 …						11600	5796	7467	362	2810	3313	4784	7655	8041	9505	3909	5968	5737	5831	1300
530098	980307	222	530098	85:3608.0 86:5549.0 87:6576.0 89:16571.0 90:1324.0 91:21639.0 92:7399.0 93:15176.0 94:11960.0 95:4344.0 96:2822.0 98:2897.0 99:1911.0 100:2470.0 101:15101.0 102:5241.0 103:62223.0 104:4896.0 105:18526.0 106:12522.0 107:28858.0 108:8374.0 109:25737.0 110:2849.0 111:1839.0 112:2456.0 113:2307.0 114:1594.0 115:8256.0 116:11773.0 117:30332.0 118:6453.0 119:13970.0 120:7730.0 121:7759.0 122:3187.0 123…						24858	30644	30495	13414	29384	39997	18576	33115	18468	17637	10787	16797	26000	20976	20944
530096	1012360	369	530096	86:5704.0 87:5902.0 88:4556.0 89:6531.0 90:2837.0 91:14059.0 92:5453.0 94:3242.0 97:7622.0 99:2626.0 100:6949.0 103:53348.0 105:16600.0 108:1916.0 110:3453.0 111:9839.0 112:1982.0 115:5879.0 116:2620.0 117:11391.0 118:6383.0 119:12309.0 121:2025.0 122:1352.0 123:3136.0 125:4084.0 126:3989.0 129:70790.0 130:24169.0 131:8533.0 133:28356.0 134:1164.0 135:11016.0 136:3293.0 137:3867.0 138:2998.0 139:…						22401	30209	21968	24284	22458	22674	9838	26944	16195	14546	9846	18585	19042	16381	12681
530095	1188100	103	530095	85:5668.0 86:3967.0 88:5494.0 89:67256.0 90:4371.0 91:4504.0 92:853.0 93:878.0 94:1703.0 95:489.0 97:4267.0 98:1102.0 100:5628.0 101:16199.0 102:4487.0 103:268090.0 104:20838.0 105:29366.0 106:6213.0 107:2368.0 110:4621.0 112:16135.0 113:6256.0 114:2777.0 115:7443.0 116:5167.0 117:198736.0 118:15124.0 119:14204.0 121:443.0 124:1483.0 126:1394.0 127:3081.0 128:1743.0 129:22356.0 130:6161.0 131:240…						220936	238458	240784	198678	170896	219030	107520	227934	284327	192636	36324	285243	210446	154210	152204
530094	640331	382	530094	86:1195.0 88:1293.0 89:9687.0 90:2541.0 91:2497.0 95:709.0 99:368.0 100:15851.0 101:3545.0 102:787.0 103:29580.0 104:5047.0 105:5117.0 106:601.0 107:619.0 109:610.0 115:2350.0 117:3008.0 118:972.0 119:964.0 120:786.0 121:993.0 123:350.0 130:439.0 131:1150.0 132:5607.0 134:467.0 135:3425.0 136:992.0 137:1358.0 138:429.0 139:378.0 142:384.0 143:916.0 144:339.0 146:780.0 147:6995.0 148:2857.0 149:14…						18797	10689	22965	8080	3025	17714	12123	19063	15599	26743	9177	1171	8344	8903	1206
530093	295010	165	530093	85:49696.0 88:1156.0 89:4370.0 92:5895.0 93:119507.0 95:73712.0 96:3279.0 97:13571.0 99:12291.0 102:87.0 103:9379.0 105:2615.0 107:2467.0 112:604.0 114:1291.0 118:152.0 123:5288.0 125:3034.0 126:730.0 129:961.0 131:450.0 133:1129.0 135:504.0 137:2064.0 138:630.0 140:740.0 141:1193.0 143:2276.0 144:1163.0 145:826.0 149:1476.0 152:446.0 157:960.0 162:73.0 163:2910.0 164:729.0 165:74756.0 166:4157.0…						61607	44485	65532	69366	75404	95995	29621	125759	88306	129926	27954	1927	92731	59382	67705
530092	288808	90	530092	85:39122.0 87:4277.0 88:4941.0 89:6771.0 90:121239.0 91:8465.0 92:42909.0 93:167521.0 94:13962.0 95:69482.0 96:3465.0 97:6454.0 99:4481.0 101:4657.0 103:66796.0 104:6522.0 105:6418.0 107:3956.0 109:2007.0 112:1193.0 113:3655.0 115:6029.0 117:91791.0 118:8302.0 123:62703.0 124:5585.0 125:26652.0 127:1465.0 129:5461.0 131:1944.0 132:176.0 133:975.0 134:316.0 135:1656.0 136:521.0 137:5802.0 138:679.…						99915	73355	118794	89926	75226	126597	59677	101489	87266	107564	46103	138065	120695	76238	79938
530091	588816	179	530091	85:282.0 89:5012.0 90:961.0 91:5163.0 92:1127.0 93:2275.0 94:420.0 95:1486.0 97:942.0 99:3135.0 103:2082.0 104:3797.0 105:3611.0 106:253.0 108:138.0 110:808.0 112:989.0 113:1031.0 115:3439.0 117:3058.0 118:1037.0 119:2843.0 120:830.0 121:639.0 123:879.0 125:884.0 126:645.0 127:1447.0 128:1159.0 130:4736.0 131:3300.0 132:3214.0 133:5451.0 134:1233.0 135:3410.0 136:790.0 137:349.0 139:160.0 140:329…						123582	36723	125884	51220	14112	59172	31518	70689	63161	110813	24227	64557	46245	52509	39601
530090	301973	165	530090	85:83430.0 86:5103.0 87:351.0 88:1077.0 89:2219.0 90:405.0 91:1592.0 92:5057.0 93:193616.0 94:19414.0 95:107307.0 96:7235.0 97:20988.0 98:780.0 99:6156.0 101:2317.0 103:614.0 105:2888.0 106:625.0 107:3983.0 111:640.0 113:3653.0 114:1971.0 115:6458.0 116:709.0 117:1217.0 119:1155.0 121:1024.0 122:184.0 123:864.0 125:1512.0 128:1067.0 129:1690.0 135:2550.0 136:927.0 137:3451.0 139:764.0 141:2288.0 …						98211	68678	133829	110725	107534	184127	88091	199546	135073	207535	61903	258463	153569	93306	119835
530088	338273	179	530088	85:15659.0 86:2297.0 87:5296.0 88:5335.0 89:3389.0 91:838.0 93:68268.0 94:7094.0 95:31559.0 96:1237.0 97:2361.0 99:4004.0 101:7070.0 102:726.0 103:37815.0 104:4447.0 105:5262.0 109:672.0 111:1406.0 113:2161.0 114:505.0 115:26801.0 116:2586.0 117:27818.0 118:3220.0 119:2216.0 123:2434.0 124:582.0 125:2510.0 127:2452.0 129:33880.0 130:6132.0 131:37928.0 132:3241.0 133:13694.0 134:1433.0 137:2742.0 …						145331	156970	164605	167764	119864	175196	88809	157372	178854	189422	129982	196604	140387	126587	138903
530087	335650	166	530087	85:1645.0 87:786.0 91:3161.0 92:112610.0 93:9268.0 94:1442.0 95:2357.0 96:1248.0 99:1458.0 100:3445.0 102:719.0 104:949.0 105:381.0 106:6483.0 107:2385.0 108:5654.0 109:1043.0 110:1693.0 111:2114.0 113:1300.0 120:1268.0 121:390.0 122:1810.0 123:1341.0 125:3650.0 135:1530.0 136:85530.0 137:11290.0 138:3982.0 139:2762.0 146:861.0 148:14370.0 149:5152.0 150:6199.0 151:2109.0 152:1817.0 155:302.0 164…						106376	145395	121423	167273	144582	91543	79550	97471	195302	168290	57959	158359	91028	71942	66477
530086	436901	178	530086	85:28732.0 86:2352.0 87:14342.0 88:11317.0 89:12358.0 91:1780.0 92:13178.0 93:248449.0 94:50390.0 95:270250.0 96:4123.0 97:20718.0 98:4345.0 99:6480.0 101:32930.0 102:1105.0 103:91331.0 104:22253.0 105:51713.0 106:949.0 107:5061.0 108:2460.0 109:8533.0 111:13892.0 113:12845.0 115:23503.0 116:9966.0 117:52883.0 118:7665.0 119:9872.0 120:673.0 121:8759.0 123:58991.0 125:14367.0 127:133525.0 128:131…						176418	196478	34521	191007	140790	206789	115153	160761	173887	179059	157072	207865	171282	152838	141452
530085	432198	178	530085	85:34148.0 86:630.0 87:10694.0 88:8485.0 92:13488.0 93:455550.0 94:34245.0 95:188136.0 96:7466.0 97:22273.0 98:2925.0 99:4905.0 100:317.0 101:60182.0 102:8150.0 103:224973.0 104:18015.0 105:32808.0 106:1637.0 107:10342.0 108:2739.0 109:5664.0 110:1176.0 111:13461.0 113:7114.0 114:2183.0 115:32628.0 116:10439.0 117:26186.0 118:1779.0 119:15761.0 121:2169.0 122:1706.0 123:55345.0 124:3624.0 126:270…						172076	81514	195546	177437	143769	216411	118365	178614	204235	207556	126397	200484	171071	128317	152373
530084	990975	262	530084	85:295.0 86:692.0 87:4771.0 88:1432.0 89:11330.0 90:1495.0 91:5284.0 97:4721.0 99:1101.0 100:1527.0 101:2634.0 102:1985.0 103:100041.0 104:9711.0 105:3463.0 113:561.0 114:2306.0 115:8800.0 116:6359.0 117:16978.0 118:3644.0 123:971.0 125:914.0 126:121.0 127:1492.0 128:2873.0 129:26667.0 130:10633.0 131:16169.0 132:4556.0 133:16877.0 134:3718.0 137:1408.0 139:823.0 140:2078.0 141:3195.0 142:2538.0 …						117016	65886	73168	46362	93935	74375	41726	133129	32637	21928	43694	36346	78377	68708	64247
530082	280341	90	530082	85:165530.0 87:15105.0 88:30603.0 89:31455.0 90:798695.0 91:52209.0 92:275027.0 93:869848.0 94:72507.0 95:372799.0 96:25629.0 97:39775.0 98:2897.0 99:35391.0 100:1464.0 101:16380.0 102:2307.0 103:435421.0 104:43923.0 105:28703.0 106:2329.0 107:5155.0 108:2300.0 109:9817.0 111:8895.0 112:2261.0 113:13285.0 114:5617.0 115:27513.0 116:4614.0 117:3406.0 118:590.0 119:1920.0 120:622.0 121:3887.0 122:1…						658215	407717	766844	601228	554131	824904	428785	782260	535731	730981	277827	14004	772170	438379	486923
530081	1012647	320	530081	85:46426.0 86:3741.0 87:15634.0 88:3200.0 89:48121.0 90:2375.0 91:17320.0 93:5150.0 94:1347.0 95:21293.0 96:4121.0 97:43976.0 98:8760.0 99:30313.0 100:627.0 101:68819.0 102:17707.0 103:383764.0 104:39533.0 105:11752.0 106:2632.0 107:2764.0 109:38235.0 110:2812.0 111:29372.0 112:4579.0 113:29778.0 114:10759.0 115:28165.0 116:22685.0 117:118909.0 118:10368.0 119:11490.0 120:3668.0 121:6380.0 122:34…						367313	80488	177627	69483	139994	51934	107058	381897	43997	54179	111059	51044	85113	79565	80244
530071	1203776	85	530071	85:99024.0 86:6959.0 95:2332.0 96:7588.0 97:34204.0 98:8672.0 99:41496.0 100:2783.0 109:995.0 110:3634.0 111:15742.0 112:5073.0 113:23720.0 114:1675.0 122:145.0 123:563.0 124:2740.0 125:7354.0 126:3726.0 127:14191.0 128:1120.0 129:273.0 137:366.0 138:1545.0 139:3881.0 140:2827.0 141:8828.0 142:1242.0 152:869.0 153:1582.0 154:2347.0 155:6976.0 156:469.0 157:110.0 162:105.0 165:181.0 166:681.0 167:…						10639	19455	5370	14351	4699	3858	1730	2092	17215	6539	2548	2440	5437	4130	5116
530070	1165319	85	530070	85:116878.0 86:8505.0 95:2752.0 96:9253.0 97:31018.0 98:10319.0 99:46884.0 100:3544.0 110:4439.0 111:16149.0 112:6392.0 113:28954.0 114:2653.0 123:148.0 124:3185.0 125:9186.0 126:4098.0 127:19899.0 128:1829.0 130:136.0 136:213.0 138:2191.0 139:4766.0 140:2374.0 141:11943.0 142:1809.0 152:1378.0 153:2871.0 154:2742.0 155:9893.0 156:1232.0 157:240.0 162:347.0 166:902.0 167:1172.0 168:2091.0 169:703…						11137	23723	7168	14016	4710	4693	1792	2304	19709	7603	3001	2826	5263	4686	5389
530002	1132188	85	530002	85:36509.0 86:2437.0 94:106.0 95:898.0 97:8918.0 98:2935.0 99:13135.0 100:615.0 110:873.0 111:4354.0 112:1155.0 113:8112.0 114:765.0 123:294.0 124:825.0 125:2292.0 126:1094.0 127:5064.0 128:450.0 138:405.0 139:1354.0 140:1049.0 141:3902.0 142:498.0 153:443.0 154:671.0 155:2689.0 158:75.0 166:268.0 167:296.0 168:446.0 169:2327.0 170:129.0 179:94.0 182:470.0 183:1571.0 184:281.0 196:448.0 197:921.0…						21262	33949	12344	22247	5458	6816	3110	3548	32046	5074	3201	5799	7644	10329	11052
529604	553301	158	529604	85:2115.0 87:985.0 88:610.0 89:6714.0 90:645.0 91:3994.0 92:688.0 93:450.0 94:769.0 95:1294.0 96:1239.0 97:1765.0 98:873.0 99:3525.0 100:6967.0 101:5390.0 103:49490.0 104:4398.0 105:4107.0 106:352.0 107:400.0 108:213.0 111:306.0 112:611.0 113:3802.0 115:3529.0 116:4641.0 117:11251.0 118:1274.0 119:2639.0 120:386.0 121:333.0 122:2296.0 123:184.0 124:251.0 125:583.0 126:456.0 127:1331.0 128:1495.0 …						917	1327	970	1104	136	891	1083	1104	1661	1079	575	1420	1167	1170	2143
525988	459217	237	525988	86:688.0 92:182.0 93:132.0 100:729.0 102:75.0 105:110.0 106:306.0 110:120.0 111:253.0 120:117.0 130:342.0 132:166.0 134:173.0 135:103.0 137:87.0 141:56.0 149:91.0 150:39.0 157:32.0 163:888.0 164:720.0 165:438.0 166:47.0 174:235.0 212:21.0 221:46.0 222:28.0 228:30.0 229:42.0 236:247.0 237:4469.0 238:740.0 239:368.0 240:72.0 241:50.0 255:134.0 284:64.0 300:56.0 360:35.0 362:31.0 396:18.0 459:22.0						599	959	754	873	1479	1878	626	962	1105	502	1255	935	2244	2812	2712
523965	637927	344	523965	85:7116.0 86:3816.0 87:8440.0 88:951.0 91:9607.0 92:1111.0 93:3807.0 94:1789.0 95:3600.0 96:145.0 97:5082.0 98:2757.0 99:13520.0 101:39283.0 102:14157.0 106:3752.0 107:1394.0 110:894.0 111:20417.0 112:3978.0 113:24181.0 115:35408.0 116:27263.0 118:4653.0 119:27201.0 120:2561.0 121:4637.0 123:939.0 124:216.0 125:5541.0 127:13991.0 128:3539.0 129:181748.0 130:23649.0 131:107948.0 132:12536.0 133:20…						2516	3575	3608	3347	2266	1502	5699	2425	2131	2867	2537	2392	1208	1383	1556
523950	956144	331	523950	85:2070.0 86:141.0 87:1267.0 88:369.0 89:2359.0 90:449.0 91:6343.0 92:1111.0 93:2969.0 94:788.0 95:870.0 96:477.0 97:213.0 99:2619.0 101:728.0 103:15041.0 104:2317.0 105:3803.0 106:354.0 107:6206.0 108:893.0 110:226.0 111:784.0 112:250.0 113:1044.0 114:880.0 115:2028.0 116:2088.0 117:6351.0 118:3677.0 119:2899.0 120:963.0 121:1606.0 122:400.0 123:623.0 124:386.0 125:107.0 126:251.0 127:478.0 128:…						3409	4184	4635	6202	3757	4820	3572	4068	5884	5832	2514	6128	4134	3478	3483
523785	566359	231	523785	85:16543.0 86:7725.0 87:15098.0 88:6364.0 89:112038.0 90:9226.0 91:9742.0 92:869.0 93:931.0 94:624.0 95:1256.0 96:2059.0 97:3872.0 98:3965.0 99:13955.0 100:43406.0 101:56555.0 102:21208.0 103:357177.0 104:34293.0 105:31623.0 106:2404.0 107:1139.0 108:5170.0 109:1198.0 110:1172.0 111:9677.0 112:4136.0 113:12788.0 114:8102.0 115:45380.0 116:15928.0 117:120339.0 118:15148.0 119:21247.0 120:2286.0 12…						1994	1149	856	915	937	944	584	1727	801	907	856	912	1098	6746	8589
520569	902459	215	520569	87:252.0 91:1411.0 93:2861.0 94:492.0 95:2375.0 96:699.0 97:690.0 98:231.0 99:330.0 101:112.0 103:3865.0 104:335.0 105:555.0 106:152.0 107:511.0 108:184.0 109:552.0 110:115.0 111:139.0 116:802.0 117:1187.0 118:248.0 120:196.0 121:537.0 122:50.0 123:484.0 124:30.0 125:425.0 129:2943.0 130:591.0 131:581.0 132:57.0 133:392.0 134:109.0 136:145.0 137:193.0 140:82.0 141:277.0 143:283.0 144:21.0 145:88.…						1639	1379	1706	1911	1456	1708	1409	1742	1927	1503	1109	1864	1313	1455	1261
517911	966572	361	517911	88:810.0 89:1467.0 97:1233.0 99:2566.0 101:1753.0 103:24479.0 104:1559.0 109:1754.0 111:723.0 117:3607.0 118:195.0 119:1734.0 129:25078.0 130:407.0 131:1443.0 133:3348.0 139:292.0 143:1829.0 144:52.0 145:822.0 147:34396.0 148:5156.0 149:2062.0 150:46.0 153:842.0 155:3739.0 157:1876.0 159:369.0 168:215.0 169:17720.0 170:2833.0 171:1651.0 172:336.0 173:705.0 177:1068.0 178:108.0 181:235.0 182:47.0 …						95921	100420	103494	117225	97621	97128	56350	93638	99001	89468	33135	95540	67908	56784	63106
517211	646198	368	517211	85:92.0 87:748.0 88:1490.0 89:3426.0 90:1342.0 91:1774.0 95:525.0 97:779.0 98:155.0 101:1589.0 102:1471.0 103:3036.0 105:3379.0 106:529.0 107:224.0 109:95.0 110:279.0 111:562.0 113:554.0 115:5200.0 116:526.0 117:4602.0 118:958.0 119:3735.0 120:613.0 121:1310.0 122:245.0 123:310.0 125:951.0 126:381.0 127:920.0 128:2286.0 129:1437.0 131:6233.0 132:525.0 133:16383.0 134:2185.0 135:5439.0 136:1193.0 …						132854	131035	173281	122953	97048	190651	133129	217455	155116	173908	121647	174450	106057	102391	109699
517210	628973	368	517210	85:614.0 86:412.0 87:1054.0 88:620.0 89:9185.0 91:2186.0 93:838.0 101:573.0 102:454.0 103:6179.0 104:868.0 105:2683.0 106:303.0 107:674.0 108:157.0 109:216.0 111:451.0 112:457.0 113:282.0 114:586.0 115:3304.0 116:1391.0 117:2984.0 118:438.0 119:1571.0 121:600.0 122:128.0 127:694.0 128:1152.0 129:1732.0 131:4728.0 132:555.0 133:6325.0 134:1192.0 135:2563.0 137:334.0 138:118.0 139:149.0 142:196.0 1…						145704	146619	179237	132975	90431	201448	123144	215102	159408	211717	127769	180227	108634	119396	112931
516964	346585	300	516964	86:1580.0 88:922.0 89:501.0 90:883.0 91:405.0 95:153.0 96:891.0 100:7301.0 101:962.0 102:799.0 104:813.0 105:205.0 107:870.0 108:977.0 109:115.0 110:7165.0 111:817.0 112:449.0 113:1317.0 115:1948.0 116:2250.0 119:330.0 120:578.0 122:311.0 123:409.0 124:580.0 127:1143.0 128:9232.0 129:12756.0 130:4962.0 132:624.0 133:1073.0 134:480.0 138:966.0 140:425.0 141:230.0 143:8131.0 144:444.0 146:143.0 147…						3307	1326	1110	2748	66472	5167	1118	470	1834	6397	1901	2682	2016	1236	1090
513551	840376	319	513551	85:14688.0 86:8548.0 87:15167.0 88:11249.0 89:55283.0 90:6830.0 91:1654.0 92:1873.0 94:4952.0 95:1082.0 96:4355.0 97:5532.0 98:4871.0 99:14349.0 100:27435.0 101:46567.0 102:13705.0 103:413563.0 104:39356.0 105:20378.0 106:4560.0 107:1656.0 108:3385.0 109:1602.0 110:2090.0 111:5931.0 112:5624.0 113:16404.0 114:10809.0 115:18736.0 116:18722.0 117:245176.0 118:26324.0 119:19901.0 120:2922.0 121:1641…						1586	1537	1496	1613	1727	1366	864	1421	524	1149	713	1460	1038	1330	1277
509528	703963	318	509528	87:1334.0 89:268.0 99:1997.0 100:1448.0 101:1056.0 103:9343.0 105:301.0 113:830.0 114:419.0 115:364.0 119:1027.0 121:65.0 126:532.0 127:1059.0 129:4512.0 130:611.0 131:1548.0 133:8080.0 134:374.0 135:1011.0 136:259.0 141:349.0 142:445.0 143:1410.0 144:552.0 147:30126.0 148:5580.0 149:2655.0 150:532.0 152:256.0 156:164.0 157:1318.0 167:124.0 170:328.0 175:455.0 177:251.0 179:34.0 181:77.0 183:159.…						50963	40960	28426	85916	49411	60418	29553	31838	60456	57654	26081	68461	38267	33206	35611
505754	1017221	361	505754	85:8962.0 86:1296.0 87:8846.0 88:3946.0 89:21610.0 90:2650.0 95:879.0 97:6568.0 98:994.0 99:11247.0 100:905.0 101:69702.0 102:38448.0 103:241299.0 104:19554.0 105:9491.0 106:588.0 107:2981.0 109:7703.0 110:1146.0 111:3360.0 112:1225.0 113:14566.0 114:1671.0 115:17653.0 116:50771.0 117:149393.0 118:14484.0 119:12338.0 121:1547.0 124:502.0 125:3688.0 127:8191.0 128:1872.0 129:264553.0 130:56883.0 1…						8478	10086	8536	10087	16133	4320	5714	6447	8365	8746	6339	15905	6643	6661	6814
486463	1241286	361	486463	85:3506.0 86:107.0 87:1888.0 88:436.0 89:3930.0 90:339.0 95:1070.0 97:2060.0 99:3123.0 100:631.0 101:4730.0 103:61165.0 104:5667.0 105:2926.0 107:509.0 108:308.0 109:5943.0 111:2753.0 113:2696.0 115:2622.0 117:14645.0 118:1488.0 120:280.0 123:201.0 125:787.0 126:221.0 127:2517.0 129:52912.0 130:6138.0 131:7474.0 132:946.0 133:9226.0 134:1264.0 136:211.0 137:208.0 138:49.0 139:1271.0 140:1102.0 14…						316	1345	720	4501	1314	840	724	815	1730	1846	1289	2371	911	964	1029
480022	961899	361	480022	85:16033.0 86:4388.0 87:20331.0 88:4516.0 89:63143.0 90:19835.0 91:18129.0 94:1440.0 95:2672.0 97:8657.0 98:3096.0 99:18648.0 100:701.0 101:47482.0 102:14403.0 103:400199.0 104:46421.0 105:19989.0 106:8314.0 107:39241.0 108:3433.0 109:32213.0 110:2763.0 111:17735.0 112:2743.0 113:18728.0 114:5614.0 115:23220.0 116:27659.0 117:204840.0 118:16727.0 119:31105.0 120:3771.0 121:1193.0 122:738.0 123:25…						89780	86628	15971	9730	7129	91078	66764	106803	93979	79454	9409	103430	62512	11884	14039
474821	1010170	204	474821	85:1400.0 86:359.0 88:1162.0 94:345.0 95:514.0 97:1167.0 98:86.0 99:1444.0 100:562.0 101:4607.0 102:394.0 103:58067.0 104:5764.0 105:1333.0 106:155.0 109:1982.0 111:1008.0 112:432.0 113:2999.0 114:120.0 115:2106.0 116:1845.0 117:9975.0 118:153.0 119:1195.0 120:217.0 122:146.0 123:77.0 124:85.0 125:706.0 126:479.0 127:2360.0 128:428.0 129:71962.0 130:8350.0 131:9856.0 132:1312.0 133:20579.0 134:17…						73016	54906	56149	55467	45225	44691	34294	18599	39589	32548	27033	48866	43027	17901	18705
474299	222792	186	474299	85:1367.0 87:1956.0 88:1160.0 89:220.0 90:1983.0 91:494.0 92:257.0 93:515.0 94:588.0 95:328.0 97:1193.0 98:2903.0 100:3031.0 101:1061.0 104:1864.0 106:1868.0 107:500.0 108:2222.0 110:6521.0 111:374.0 114:37.0 115:4491.0 120:1665.0 122:197.0 123:174.0 124:284.0 125:799.0 126:9505.0 127:670.0 128:325.0 130:2467.0 131:7858.0 132:2555.0 133:1980.0 134:6043.0 135:1031.0 136:148.0 137:832.0 138:578.0 1…						2832	2267	2863	2162	3338	2727	2690	3175	2290	2295	2291	3244	2008	2379	1793
471773	237456	120	471773	87:16779.0 88:56457.0 89:43727.0 90:15723.0 91:13551.0 95:3619.0 96:919.0 97:3150.0 101:6602.0 102:4303.0 103:36176.0 104:62749.0 105:29465.0 107:3564.0 109:882.0 110:3460.0 115:2714.0 117:79344.0 118:35400.0 120:882122.0 121:122091.0 122:43860.0 127:2786.0 131:112795.0 132:37986.0 133:31782.0 134:37510.0 136:35800.0 137:5634.0 140:515.0 143:250.0 147:355569.0 148:41795.0 155:4248.0 159:795.0 162…						6063	5421	5834	7079	7620	6383	3101	8661	5247	8000	3016	10680	7761	6742	6622
458557	1041967	259	458557	85:2996.0 87:964.0 88:966.0 89:7439.0 90:883.0 95:800.0 97:2957.0 98:637.0 99:2592.0 100:279.0 101:4586.0 102:2046.0 103:56132.0 104:5225.0 105:70730.0 109:986.0 114:355.0 115:5143.0 117:2446.0 118:453.0 119:3999.0 121:1362.0 123:75.0 124:67.0 125:502.0 127:1340.0 128:237.0 129:19726.0 130:4042.0 131:2185.0 132:1638.0 133:11500.0 134:2186.0 135:4153.0 136:837.0 137:442.0 138:302.0 140:284.0 141:8…						9118	6781	9422	6963	9948	9935	6007	11234	9185	6679	4246	6781	9506	6419	6782
444795	174816	117	444795	90:4676.0 101:694.0 110:2301.0 113:472.0 116:383.0 117:30511.0 118:2282.0 127:529.0 128:794.0 131:1199.0 132:859.0 133:1027.0 138:103.0 140:29666.0 141:1342.0 142:250.0 147:17873.0 148:2632.0 149:1053.0 156:228.0 157:421.0 177:131.0 183:67.0 187:4482.0 200:106.0 205:661.0 206:64.0 230:101.0 231:55.0 247:50.0 248:40.0 263:43.0 270:83.0 272:87.0 283:40.0 284:48.0 288:42.0 291:53.0 306:35.0 307:37.0…						137842	62130	61488	67612	56115	59082	31359	80025	55665	62661	48729	71519	44353	45369	53589
425117	736157	204	425117	87:923.0 88:1128.0 89:2585.0 90:217.0 97:1666.0 99:1732.0 100:4460.0 101:3512.0 102:518.0 103:10288.0 104:559.0 105:630.0 106:148.0 110:140.0 114:766.0 115:1302.0 117:17786.0 118:2572.0 120:236.0 124:92.0 127:460.0 129:11985.0 130:3625.0 131:13919.0 132:3253.0 133:6716.0 134:480.0 135:796.0 137:174.0 139:266.0 143:2204.0 144:622.0 147:25173.0 148:4766.0 149:3813.0 150:612.0 151:67.0 152:235.0 154…						8523	7140	9715	5070	9785	9381	1868	14582	6556	5897	4625	10358	7536	6073	6631
422770	326198	169	422770	95:400.0 97:4015.0 100:527.0 108:350.0 111:774.0 113:700.0 125:2693.0 126:276.0 127:772.0 139:1280.0 144:446.0 146:405.0 147:3301.0 169:20563.0 170:2087.0 172:370.0 174:117.0 184:1037.0 185:259.0 189:867.0 229:695.0 230:320.0 262:69.0						10419	8010	6835	11145	6026	10775	6992	8708	5996	5044	19945	11268	7400	6734	7370
422769	1033053	219	422769	87:370.0 88:540.0 90:552.0 91:1140.0 92:250.0 94:206.0 95:624.0 102:655.0 109:165.0 113:764.0 116:118.0 119:257.0 122:48.0 124:153.0 133:1585.0 136:184.0 139:397.0 141:225.0 146:159.0 147:5591.0 148:392.0 149:729.0 150:272.0 151:202.0 153:213.0 173:89.0 176:264.0 178:174.0 179:119.0 189:386.0 190:107.0 191:1124.0 193:168.0 199:81.0 201:309.0 203:471.0 210:90.0 219:32701.0 220:6348.0 221:2097.0 22…						2077	1934	1604	1594	1816	1798	1268	2492	1519	1000	1155	1922	1718	1911	1493
422501	385381	243	422501	85:30774.0 86:104955.0 87:57167.0 88:10085.0 89:8701.0 90:1536.0 91:1132.0 92:5369.0 93:2651.0 94:2910.0 95:2784.0 96:6289.0 97:13390.0 98:49381.0 99:110509.0 100:1218503.0 101:134317.0 102:58391.0 103:61493.0 104:5819.0 105:12800.0 106:20102.0 107:6585.0 108:1161.0 109:973.0 110:5421.0 111:54261.0 112:17235.0 113:18947.0 114:223298.0 115:39082.0 116:11826.0 117:36218.0 118:7266.0 119:5887.0 120:…						577	568	481	653	597	1635	618	1070	1189	1467	1001	2178	693	726	1154
417686	658997	203	417686	86:1178.0 88:1290.0 89:15965.0 90:1042.0 91:946.0 99:2074.0 100:4263.0 101:3379.0 102:2941.0 103:53024.0 104:7800.0 105:12240.0 106:1958.0 109:713.0 110:490.0 113:2429.0 114:776.0 116:1941.0 117:28646.0 118:2936.0 119:3004.0 120:991.0 121:906.0 123:388.0 124:258.0 125:519.0 126:182.0 127:2812.0 128:1787.0 129:40364.0 130:8597.0 131:10810.0 132:3243.0 133:13761.0 134:4426.0 135:4318.0 136:677.0 13…						19148	22460	18993	14819	18788	16642	32049	18500	15011	17733	16518	15559	13545	11818	12556
413972	670093	131	413972	86:91.0 89:300.0 90:66.0 91:428.0 93:161.0 99:227.0 102:215.0 106:94.0 107:159.0 109:151.0 111:218.0 112:150.0 115:528.0 119:160.0 124:50.0 126:119.0 127:241.0 128:126.0 131:14569.0 132:1741.0 133:773.0 134:130.0 136:90.0 141:178.0 142:75.0 145:64.0 148:80.0 153:72.0 155:77.0 158:99.0 159:130.0 160:49.0 162:47.0 163:113.0 165:112.0 181:85.0 182:9.0 183:50.0 187:51.0 191:106.0 201:59.0 203:45.0 21…						7528	9907	9495	11395	8456	10414	22695	11100	11683	12015	9570	12298	7927	8102	8395
413756	350714	131	413756	93:350.0 116:7.0 131:2608.0 147:1094.0						115757	125145	123724	126248	90337	132854	71174	112820	134717	146376	92950	144665	103023	56867	88516
412740	465893	131	412740	85:239.0 86:66.0 87:1046.0 89:72.0 90:944.0 91:3095.0 92:483.0 93:875.0 99:349.0 101:509.0 103:259.0 104:178.0 105:497.0 106:485.0 107:275.0 108:133.0 109:93.0 110:165.0 114:974.0 115:333.0 116:253.0 117:458.0 118:93.0 119:392.0 120:228.0 121:308.0 122:658.0 124:37.0 125:88.0 129:184.0 130:174.0 131:15656.0 132:1940.0 133:1128.0 134:177.0 135:134.0 136:84.0 137:121.0 138:115.0 143:65.0 144:221.0 …						7490	8307	7804	7690	8023	8357	8199	8951	6164	7354	6277	7575	7501	7954	6916
411488	424208	140	411488	86:10068.0 87:1068.0 88:1190.0 89:1101.0 90:262.0 95:676.0 98:1768.0 99:1890.0 100:9611.0 101:6763.0 102:6242.0 106:118.0 110:367.0 111:213.0 113:1337.0 115:2815.0 116:4463.0 117:3031.0 118:1164.0 119:78.0 122:131.0 124:348.0 125:763.0 129:555.0 130:3963.0 131:2816.0 132:1031.0 134:96.0 136:90.0 137:86.0 138:383.0 139:661.0 140:25334.0 141:6741.0 142:2369.0 144:433.0 146:446.0 152:85.0 155:286.0 …						8116	6739	5365	6104	4173	6464	12803	7272	7250	8594	8603	8073	4937	5199	1535
408454	236361	120	408454	85:2437.0 87:1607.0 88:989.0 90:2065.0 92:944.0 96:892.0 101:1497.0 103:9366.0 104:2629.0 106:1071.0 120:37731.0 121:4665.0 122:1636.0 128:1080.0 129:253.0 131:3796.0 132:2321.0 135:266.0 136:842.0 148:1806.0 149:1149.0 154:136.0 165:329.0 166:159.0 167:167.0 177:169.0 179:136.0 183:384.0 194:1682.0 196:139.0 214:37.0 216:68.0 222:406.0 283:106.0 298:43.0 300:16.0 321:21.0 323:29.0 337:30.0 338:1…						5083	5085	5938	6610	7110	5492	2789	7801	4322	7702	2716	10680	7761	6405	6375
407559	1003648	236	407559	85:3010.0 86:313.0 87:376.0 88:104.0 89:894.0 91:1822.0 92:631.0 93:2958.0 94:2135.0 95:2682.0 96:751.0 97:810.0 99:491.0 101:2039.0 103:14001.0 104:837.0 105:2104.0 106:2071.0 107:1716.0 108:1763.0 109:1439.0 110:543.0 111:720.0 112:203.0 113:345.0 115:890.0 116:1062.0 117:5030.0 118:945.0 119:2174.0 120:3208.0 121:2541.0 122:1358.0 123:814.0 124:425.0 125:313.0 126:234.0 127:201.0 128:188.0 129…						6053	9232	8262	8395	5277	8571	4086	7087	4998	4891	2800	3952	6813	5496	4930
407558	461142	206	407558	88:252.0 89:1405.0 91:1120.0 94:371.0 95:1834.0 102:366.0 103:1278.0 104:306.0 105:189.0 110:97.0 115:827.0 129:340.0 131:2003.0 132:283.0 135:209.0 137:171.0 143:699.0 146:96.0 147:4456.0 148:659.0 149:2060.0 151:277.0 153:122.0 157:271.0 159:178.0 161:101.0 167:68.0 171:7332.0 172:1388.0 173:855.0 174:258.0 175:369.0 176:70.0 177:158.0 178:73.0 179:2072.0 180:387.0 181:220.0 186:461.0 188:90.0 …						3773	3864	4971	5688	3784	4242	2738	4276	6152	2993	1995	5866	3835	3917	3521
407259	851484	117	407259	85:801.0 86:580.0 87:1639.0 89:10042.0 91:2001.0 92:584.0 93:675.0 95:1199.0 96:971.0 99:4683.0 101:8278.0 102:4700.0 103:60913.0 104:6594.0 113:6519.0 114:879.0 115:5945.0 116:2706.0 117:151556.0 118:14020.0 119:6761.0 120:1149.0 122:229.0 124:1485.0 127:1291.0 128:4392.0 129:43317.0 130:974.0 131:12913.0 132:3070.0 133:21888.0 134:3288.0 135:2840.0 138:458.0 140:3315.0 141:2925.0 142:20161.0 14…						3931	2511	2357	3361	2349	4753	2180	2352	1827	2400	8481	4056	2283	2869	2824
406851	560420	191	406851	85:450.0 87:643.0 89:2705.0 90:121.0 92:316.0 94:1352.0 97:2945.0 98:4445.0 99:1417.0 100:2274.0 101:1392.0 103:17896.0 104:992.0 111:250.0 113:387.0 116:902.0 118:581.0 119:678.0 128:622.0 129:3493.0 131:6029.0 132:913.0 133:3067.0 135:122.0 137:151.0 138:233.0 140:1614.0 141:1503.0 142:2630.0 143:860.0 144:381.0 145:223.0 146:518.0 147:34296.0 148:5875.0 149:3482.0 150:261.0 152:502.0 156:767.0…						2767	1002	853	2246	3958	1089	2458	1205	1134	1166	621	1276	483	660	884
403585	502458	125	403585	89:2203.0 90:161.0 94:187.0 95:649.0 96:344.0 98:255.0 100:149.0 101:751.0 103:7990.0 104:790.0 105:540.0 108:49.0 109:29.0 111:352.0 112:53.0 122:39.0 124:295.0 125:9938.0 126:736.0 127:127.0 133:477.0 134:111.0 138:341.0 139:617.0 140:325.0 142:97.0 144:84.0 147:1128.0 148:237.0 152:325.0 154:556.0 155:491.0 167:50.0 168:1430.0 169:144.0 170:80.0 180:106.0 181:78.0 182:172.0 183:357.0 191:418.0…						2158	2201	1333	1971	1831	2323	3016	2304	2286	2388	2285	1606	1703	1504	1393
401914	451525	112	401914	86:285.0 87:162.0 88:172.0 89:192.0 90:62.0 95:317.0 96:218.0 97:106.0 98:3342.0 99:388.0 101:283.0 102:65.0 103:2184.0 104:877.0 105:326.0 108:54.0 109:45.0 110:880.0 111:99.0 112:18060.0 113:1381.0 114:241.0 115:36.0 116:532.0 117:1917.0 118:205.0 119:116.0 122:77.0 123:35.0 128:88.0 129:1012.0 130:336.0 131:461.0 132:1111.0 133:215.0 140:39.0 143:125.0 145:312.0 146:83.0 157:74.0 158:8.0 159:2…						1309	2283	1954	2636	1346	1912	841	1595	1990	1796	607	2025	2046	1883	1748
401130	785618	407	401130	85:44.0 88:105.0 89:280.0 91:192.0 94:77.0 95:486.0 97:121.0 98:124.0 100:45.0 102:43.0 103:379.0 105:95.0 106:47.0 113:64.0 114:136.0 115:721.0 116:314.0 122:372.0 123:117.0 126:111.0 127:280.0 128:215.0 129:1268.0 130:284.0 131:2285.0 132:551.0 134:84.0 136:48.0 137:547.0 138:72.0 139:90.0 140:158.0 141:379.0 144:501.0 145:432.0 147:362.0 150:16.0 151:54.0 152:134.0 153:140.0 154:119.0 155:145.…						1298	329	1489	1041	1118	1423	909	3612	1536	1151	998	1414	1310	1441	1545
401109	832673	347	401109	85:448.0 86:643.0 87:337.0 88:291.0 89:3508.0 90:562.0 91:624.0 93:199.0 94:126.0 95:262.0 98:640.0 99:526.0 100:644.0 101:498.0 102:377.0 103:217.0 104:221.0 105:482.0 106:196.0 107:306.0 108:48.0 110:78.0 112:136.0 113:406.0 114:1048.0 115:1052.0 116:462.0 117:116.0 118:235.0 119:446.0 121:1603.0 122:285.0 123:122.0 124:54.0 125:45.0 126:253.0 127:508.0 128:3898.0 129:1323.0 130:638.0 131:371.0…						343	1541	1913	1280	1564	1565	821	2497	892	675	1152	1386	1582	642	940
401106	685281	260	401106	85:434.0 86:395.0 87:697.0 88:541.0 89:2965.0 90:692.0 91:985.0 92:440.0 93:1013.0 94:959.0 95:454.0 96:231.0 98:329.0 99:619.0 100:1250.0 101:2206.0 102:1589.0 103:1008.0 104:543.0 105:746.0 106:86.0 107:393.0 108:248.0 109:386.0 111:81.0 112:178.0 113:1578.0 114:1292.0 115:2370.0 116:1495.0 117:892.0 118:673.0 119:353.0 120:275.0 122:51.0 123:318.0 125:143.0 126:848.0 127:2126.0 128:1275.0 129:…						3383	2746	2908	1469	3149	1942	1019	3894	1210	918	1689	1402	2260	1869	1604
401102	805626	479	401102	85:6313.0 86:8097.0 87:9212.0 88:4641.0 89:7871.0 90:2612.0 91:5402.0 92:2634.0 93:3797.0 94:2063.0 95:879.0 96:1109.0 97:998.0 98:3273.0 99:5743.0 100:11472.0 101:6710.0 102:6415.0 103:13149.0 104:2799.0 105:10122.0 106:2118.0 107:3661.0 108:2245.0 109:1336.0 110:902.0 111:793.0 112:1562.0 113:7294.0 114:9245.0 115:30101.0 116:7954.0 117:9659.0 118:2829.0 119:11487.0 120:3285.0 121:5704.0 122:68…						5217	2375	676	2929	4050	2721	1570	5290	3298	2194	4295	1465	2005	2752	3587
401101	649599	400	401101	85:51695.0 86:8903.0 87:49568.0 88:14850.0 89:427641.0 90:119273.0 91:329503.0 92:40263.0 93:161655.0 94:18995.0 95:49718.0 96:115878.0 97:65995.0 98:20715.0 99:60447.0 100:6562.0 101:22581.0 102:26119.0 103:202305.0 104:70768.0 105:287904.0 106:40784.0 107:85218.0 108:31947.0 109:57386.0 110:14374.0 111:35948.0 112:21900.0 113:27160.0 114:4787.0 115:126674.0 116:25793.0 117:124056.0 118:57795.0 …						1581	2632	1520	1736	2006	2684	1339	2342	2517	2014	1374	2440	2035	2072	2039
399831	1072495	375	399831	85:215.0 86:87.0 87:510.0 88:105.0 89:1987.0 90:144.0 95:317.0 99:360.0 100:534.0 101:1689.0 102:136.0 103:4978.0 104:247.0 113:275.0 114:168.0 115:572.0 116:1063.0 117:1860.0 119:241.0 120:169.0 124:38.0 125:234.0 126:117.0 127:272.0 129:3976.0 130:547.0 131:894.0 132:169.0 133:656.0 134:188.0 140:111.0 141:69.0 142:220.0 143:2198.0 144:275.0 145:428.0 147:7717.0 148:452.0 149:260.0 150:147.0 15…						2817	2685	3048	2640	2056	2015	1240	2746	2704	2260	828	2021	2105	1990	1778
399830	563118	220	399830	85:781.0 98:267.0 99:473.0 101:9720.0 102:9884.0 107:81.0 110:625.0 111:673.0 113:464.0 115:1389.0 117:4672.0 118:1672.0 119:1697.0 121:112.0 123:48.0 126:135.0 127:218.0 128:360.0 129:16901.0 130:7675.0 131:3209.0 132:1198.0 133:10047.0 134:1214.0 135:911.0 136:128.0 137:51.0 141:241.0 143:2936.0 144:356.0 147:22408.0 148:4113.0 149:3732.0 150:561.0 151:512.0 152:105.0 153:52.0 157:836.0 159:317…						826	807	839	1047	1112	1229	679	1103	904	913	689	1015	1196	1237	1086
395912	271775	234	395912	88:1554.0 89:10092.0 90:1470.0 91:785.0 95:220.0 97:113.0 99:1839.0 103:14028.0 104:8604.0 107:103.0 108:492.0 110:4540.0 113:253.0 116:1200.0 117:2334.0 118:939.0 119:12198.0 120:1399.0 121:545.0 123:206.0 124:48.0 127:407.0 128:397.0 129:163.0 132:1277.0 134:3562.0 136:951.0 137:28.0 139:104.0 141:40.0 143:355.0 145:327.0 156:1298.0 157:409.0 159:1073.0 161:5161.0 162:630.0 163:533.0 165:154.0 …						413	826	610	932	878	981	345	813	1071	1028	513	1184	777	764	726
391855	323204	174	391855	86:27981.0 87:57608.0 88:3199.0 91:694.0 94:536.0 95:354.0 100:14489.0 101:7467.0 102:3041.0 103:1060.0 108:57.0 109:132.0 117:1453.0 119:1887.0 123:306.0 125:90.0 129:5421.0 130:6143.0 131:2567.0 133:6479.0 134:758.0 136:71.0 141:2944.0 143:3288.0 144:364.0 145:1257.0 158:180.0 174:38517.0 175:6573.0 176:2822.0 177:94.0 178:14.0 221:64.0 223:31.0 239:106.0 245:78.0 247:41.0 248:83.0 250:24.0 256…						273268	331451	355665	350460	97080	127404	88582	222549	240189	224672	107588	295848	95505	63304	41554
390140	652561	273	390140	85:2030.0 86:3702.0 87:3093.0 88:1974.0 89:24416.0 90:2306.0 91:1859.0 92:287.0 94:52.0 95:648.0 96:807.0 97:863.0 98:1345.0 99:1718.0 100:5802.0 101:12721.0 102:2278.0 103:24750.0 104:2608.0 105:7229.0 106:1111.0 107:93.0 110:293.0 111:1278.0 112:1618.0 113:1988.0 114:5274.0 115:3854.0 116:4894.0 117:42514.0 118:3762.0 119:4906.0 120:292.0 121:222.0 122:48.0 124:479.0 125:177.0 126:1784.0 127:32…						3102	3383	3099	1714	1914	1690	3351	1795	1376	2529	4535	1228	1178	1015	953
390135	628121	214	390135	87:188.0 89:2734.0 91:6304.0 92:815.0 93:6789.0 94:3810.0 97:93.0 99:143.0 100:645.0 101:395.0 103:8639.0 104:713.0 105:871.0 106:57.0 107:1544.0 112:221.0 113:217.0 114:109.0 115:411.0 116:208.0 117:3285.0 118:420.0 119:810.0 120:9008.0 121:7743.0 122:645.0 126:72.0 128:142.0 129:2689.0 130:1094.0 131:730.0 132:117.0 133:1634.0 134:206.0 135:281.0 137:88.0 142:30.0 143:279.0 144:66.0 145:91.0 14…						17096	9107	12870	25203	15586	12703	7583	18619	24839	22806	15381	22450	19018	27391	26360
390121	185157	140	390121	90:10777.0 91:478.0 92:77.0 96:77.0 97:7134.0 98:42.0 105:1060.0 107:101.0 108:389.0 110:6229.0 112:5610.0 118:186.0 128:823.0 139:141.0 140:68711.0 141:3345.0 143:118.0 153:40.0 172:122.0 187:12577.0 188:765.0 189:443.0 217:46.0 238:257.0 239:135.0 248:58.0 249:48.0 253:17.0 283:30.0 284:89.0 353:43.0 402:50.0 417:10.0 418:14.0 419:8.0 436:18.0 457:12.0 477:21.0 500:35.0						7504	6983	7342	11838	7612	7556	3893	8895	18421	11621	6183	11288	8210	14556	15425
389192	465507	305	389192	86:768.0 87:390.0 102:383.0 103:764.0 113:384.0 115:610.0 119:586.0 127:556.0 128:248.0 129:3036.0 130:605.0 131:1356.0 133:3134.0 141:322.0 143:319.0 147:13448.0 148:827.0 149:684.0 152:155.0 157:771.0 159:279.0 169:244.0 187:124.0 196:83.0 199:313.0 203:228.0 213:85.0 217:5189.0 218:822.0 221:831.0 227:150.0 231:469.0 244:101.0 264:115.0 271:2790.0 272:401.0 277:81.0 286:64.0 288:72.0 292:261.0…						2645	4172	4155	856	1402	1549	8697	1930	1327	1586	1485	1464	1084	1198	1580
386360	1080457	307	386360	85:9822.0 86:8995.0 87:11844.0 88:19330.0 89:89414.0 90:9722.0 91:13854.0 92:3297.0 94:1802.0 95:2622.0 97:4790.0 98:2344.0 99:9032.0 100:16699.0 101:25076.0 102:22703.0 103:62632.0 104:4759.0 105:49382.0 106:7137.0 107:6466.0 108:1657.0 110:1713.0 111:6765.0 112:2835.0 113:7128.0 114:14081.0 115:27712.0 116:20401.0 117:55964.0 118:5550.0 119:7934.0 121:2906.0 124:1023.0 125:1527.0 126:4032.0 127…						6967	5867	3216	6815	3432	1909	1971	5124	3314	2534	1392	2600	1794	3189	2686
385002	344713	135	385002	85:22533.0 87:55125.0 88:34392.0 89:49867.0 90:12968.0 91:14930.0 94:1234.0 95:2245.0 96:2544.0 97:2811.0 101:158938.0 102:16540.0 103:169651.0 104:70168.0 105:70776.0 106:7068.0 107:14090.0 109:3277.0 112:1147.0 115:95201.0 116:40343.0 117:439006.0 118:77041.0 119:108697.0 120:12166.0 121:23784.0 125:398.0 126:921.0 129:89613.0 130:5259.0 131:146688.0 132:20056.0 133:241899.0 134:90568.0 135:970…	753	C00116	PEDCQBHIVMGVHV-UHFFFAOYSA-N			37304	36920	34675	18732	33070	49558	26814	31571	32776	31426	22323	17451	37962	37019	33224
384999	1096337	361	384999	85:1311.0 86:550.0 87:1039.0 88:487.0 89:4531.0 90:540.0 91:499.0 92:133.0 93:143.0 94:265.0 95:258.0 96:110.0 97:1452.0 98:460.0 99:1155.0 100:2692.0 101:3761.0 102:1545.0 103:29369.0 104:3043.0 105:3107.0 106:295.0 108:207.0 109:1416.0 110:327.0 111:907.0 113:1257.0 114:740.0 115:1257.0 116:2251.0 117:8287.0 118:928.0 119:622.0 120:117.0 121:299.0 122:78.0 123:97.0 125:122.0 126:279.0 127:676.0…						816	768	678	1574	935	763	527	863	824	826	401	1046	1116	678	649
384979	368057	180	384979	85:1153.0 88:475.0 89:8152.0 90:9854.0 91:23215.0 92:2129.0 95:419.0 98:247.0 102:425.0 103:1480.0 104:51.0 105:1618.0 106:14069.0 108:336.0 110:5166.0 111:1227.0 112:158.0 117:1971.0 118:1902.0 121:909.0 122:148.0 123:239.0 125:285.0 134:5659.0 135:230.0 136:16723.0 137:6279.0 138:1216.0 139:182.0 146:307.0 154:32.0 162:91.0 164:9195.0 165:3675.0 166:1021.0 179:73.0 180:15828.0 181:1981.0 182:66…						4656	4679	4054	2011	3795	3941	3437	3053	7998	4148	2904	5255	3562	2822	3157
384837	816094	417	384837	85:6131.0 86:1849.0 87:3035.0 88:1806.0 89:20124.0 90:1369.0 91:1552.0 92:613.0 93:600.0 94:153.0 95:64.0 96:4098.0 97:1323.0 98:2245.0 99:4161.0 100:13881.0 101:7184.0 102:2814.0 103:60215.0 104:6118.0 105:4485.0 106:307.0 108:1001.0 109:778.0 110:1319.0 111:980.0 112:1404.0 113:2804.0 114:2012.0 115:2579.0 116:2261.0 117:39677.0 118:4326.0 119:3782.0 120:734.0 121:202.0 122:921.0 123:402.0 124:…						1368	677	1326	846	1096	1171	1344	771	422	496	3948	415	1371	1218	1129
382905	844730	259	382905	85:4802.0 87:1295.0 88:767.0 89:9132.0 90:896.0 97:7433.0 98:2380.0 99:2560.0 100:2644.0 101:8416.0 102:1912.0 103:33021.0 104:3309.0 105:3511.0 107:500.0 108:342.0 111:977.0 112:419.0 113:2200.0 114:1128.0 115:3548.0 116:6210.0 117:12483.0 118:1300.0 119:2215.0 123:174.0 125:445.0 126:585.0 127:2505.0 128:604.0 129:21329.0 130:3881.0 131:4076.0 132:2582.0 133:8718.0 134:1261.0 141:1263.0 142:126…						1451	1390	1808	2665	1756	764	459	2184	1984	1616	1146	2233	7320	4313	5401
382626	600716	231	382626	85:381.0 88:686.0 89:6174.0 90:221.0 92:338.0 93:899.0 94:235.0 95:498.0 97:196.0 98:373.0 99:934.0 100:770.0 101:3167.0 103:3334.0 105:2055.0 106:294.0 107:287.0 108:70.0 109:409.0 111:405.0 112:257.0 114:880.0 115:1576.0 117:8074.0 118:1066.0 119:1127.0 120:283.0 121:186.0 124:124.0 127:357.0 129:2920.0 131:2441.0 133:9637.0 134:892.0 135:578.0 136:155.0 137:210.0 140:857.0 141:597.0 142:1202.0…						1541	1777	1636	1505	1914	2064	1740	2398	1521	1629	1096	1966	1768	1731	1711
382605	769413	299	382605	85:3550.0 86:347.0 87:419.0 89:674.0 90:60.0 91:2698.0 92:327.0 93:613.0 95:3217.0 96:680.0 97:12149.0 98:777.0 99:1115.0 101:1880.0 102:573.0 103:16087.0 104:1301.0 105:1030.0 109:1174.0 110:128.0 111:4880.0 112:428.0 113:159.0 115:1979.0 116:328.0 118:198.0 119:646.0 120:58.0 121:201.0 123:389.0 125:1386.0 126:119.0 127:119.0 128:115.0 129:6015.0 130:1130.0 131:1422.0 133:4180.0 134:827.0 135:5…						1199	1191	1275	2568	1075	1320	668	2179	2498	2025	560	1927	1172	1136	1368
382214	527298	231	382214	85:12514.0 86:87343.0 87:11270.0 88:46760.0 89:10462.0 90:16058.0 91:9113.0 92:2542.0 95:907.0 96:3242.0 97:4772.0 98:25184.0 99:34275.0 100:115990.0 101:29430.0 102:57645.0 103:11594.0 104:6882.0 105:8515.0 106:2119.0 108:43792.0 109:6399.0 111:10705.0 112:3056.0 113:4359.0 114:6475.0 115:14797.0 116:187514.0 117:17947.0 118:12328.0 119:2156.0 120:632.0 124:167.0 125:13987.0 126:1012.0 127:7799.…						5997	3456	5367	5531	4550	4440	8414	3579	4041	4069	4314	4657	4681	4793	4933
381725	1069943	157	381725	85:7122.0 86:896.0 87:921.0 89:3001.0 91:8552.0 92:2664.0 93:6257.0 94:5747.0 95:17524.0 96:4670.0 97:368.0 98:5427.0 99:6688.0 100:1280.0 101:11104.0 102:2253.0 103:29503.0 104:422.0 105:4393.0 106:1716.0 107:3238.0 108:2489.0 109:6041.0 110:2131.0 111:1829.0 112:881.0 113:5553.0 114:831.0 115:7978.0 116:668.0 117:17236.0 118:2641.0 121:4732.0 122:3133.0 123:1825.0 124:1618.0 125:1411.0 128:1435…						2841	2238	2639	3177	1698	2484	1043	2317	3036	2654	885	3214	2060	1043	1937
380761	417931	204	380761	88:185.0 89:384.0 95:206.0 96:228.0 100:208.0 102:96.0 103:737.0 105:119.0 108:115.0 115:242.0 116:191.0 117:1251.0 129:299.0 131:254.0 133:713.0 142:230.0 147:1837.0 148:217.0 149:256.0 153:83.0 157:78.0 190:77.0 191:195.0 203:176.0 204:955.0 205:475.0 206:134.0 217:121.0 218:112.0 301:24.0 317:26.0 323:32.0 327:44.0 334:32.0 359:30.0 387:56.0 388:35.0 389:36.0 413:25.0 452:21.0 468:27.0 474:24.…						673	1451	1044	1986	485	1361	1074	1268	1234	1794	1018	1030	1937	2235	2243
380184	433407	201	380184	95:386.0 129:1717.0 145:1493.0 147:5013.0 165:101.0 186:327.0 189:1377.0 201:1288.0 202:1486.0 205:641.0 209:132.0 230:129.0 231:199.0 233:523.0 258:63.0 283:149.0 288:54.0 305:57.0 317:37.0 318:46.0 319:71.0 321:88.0 329:74.0 331:37.0 360:48.0 370:35.0 371:38.0 386:36.0 389:54.0 393:45.0 398:45.0 401:37.0 409:32.0 460:28.0 498:27.0 500:22.0						3236	2874	2907	2583	4499	6014	3849	3205	2791	2099	9286	2894	4014	3484	3366
379873	981123	147	379873	87:254.0 89:339.0 97:139.0 101:443.0 102:211.0 103:475.0 104:140.0 115:217.0 116:317.0 126:170.0 127:180.0 131:1577.0 132:307.0 135:176.0 145:88.0 147:11150.0 148:1523.0 149:740.0 150:128.0 152:104.0 169:102.0 172:61.0 206:87.0 210:56.0 232:39.0 237:84.0 242:50.0 247:63.0 249:87.0 252:51.0 258:63.0 267:79.0 283:86.0 284:47.0 295:87.0 300:74.0 301:51.0 306:37.0 307:36.0 308:52.0 309:25.0 315:48.0 …						457060	593545	526726	800844	800392	899714	483660	902516	807400	894154	489138	935630	833916	844264	801243
379739	567017	307	379739	87:150.0 88:102.0 91:288.0 97:177.0 101:615.0 103:2110.0 104:38.0 109:166.0 117:48.0 119:783.0 129:2256.0 141:65.0 147:3156.0 148:698.0 149:105.0 153:23.0 154:108.0 157:136.0 161:57.0 164:43.0 165:241.0 166:26.0 167:92.0 169:149.0 175:196.0 176:86.0 179:118.0 184:86.0 191:469.0 194:56.0 198:32.0 204:571.0 205:1042.0 206:369.0 211:95.0 216:49.0 218:306.0 220:138.0 222:109.0 229:42.0 233:58.0 253:4…						1233	1455	1412	1042	1397	1775	1429	1416	1841	1073	1082	1784	1174	1342	1257
379577	624659	179	379577	103:1526.0 105:451.0 126:208.0 172:1402.0 177:148.0 179:5385.0 180:813.0 194:180.0 209:74.0 221:91.0 224:936.0 237:863.0 239:405.0 249:36.0 267:1222.0 283:238.0 304:39.0 305:141.0 332:133.0 339:587.0 354:749.0 369:208.0 383:42.0 386:65.0 387:39.0 423:24.0 477:25.0 484:26.0						13298	26721	19175	20985	10581	26495	11880	21560	25858	23801	13350	33941	10976	10385	11151
379486	945997	147	379486	86:171.0 87:237.0 90:102.0 93:359.0 102:271.0 103:879.0 105:387.0 106:164.0 112:112.0 124:68.0 127:302.0 131:1186.0 133:1064.0 139:59.0 141:157.0 143:389.0 147:9365.0 148:1484.0 149:520.0 150:141.0 151:244.0 153:121.0 161:94.0 167:72.0 168:83.0 170:160.0 179:70.0 190:154.0 191:170.0 192:138.0 195:60.0 199:122.0 218:252.0 230:158.0 231:316.0 237:55.0 239:51.0 250:40.0 253:71.0 262:69.0 272:113.0 2…						15614	18727	17173	22587	23085	30401	54182	16759	31343	33773	22350	35096	22250	13445	5579
378872	476163	179	378872	87:127.0 96:245.0 106:140.0 108:128.0 119:64.0 134:174.0 151:50.0 153:85.0 163:172.0 165:113.0 179:1637.0 180:276.0 184:114.0 192:101.0 205:112.0 206:55.0 207:175.0 222:92.0 223:56.0 253:332.0 254:123.0 262:27.0 267:204.0 268:49.0 274:41.0 276:22.0 301:31.0 323:35.0 328:45.0 400:27.0 408:25.0 410:21.0 447:19.0						2717	2103	2741	3021	2258	3607	1688	2149	2258	2843	2000	4517	3806	3675	2570
378529	345454	158	378529	113:1806.0 119:11611.0 158:35724.0 160:686.0 198:1034.0 202:643.0 260:96.0 267:1693.0 284:3641.0 295:453.0 312:131.0 367:73.0 494:59.0						14037	11945	9983	10794	21528	14773	12727	16400	12113	13926	6980	23704	8125	8319	9401
378365	838321	217	378365	85:2927.0 86:164.0 89:1994.0 101:3081.0 103:8513.0 105:131.0 114:308.0 118:151.0 123:857.0 129:2415.0 138:60.0 139:89.0 147:12092.0 157:322.0 161:184.0 169:128.0 172:509.0 173:186.0 189:487.0 190:182.0 191:470.0 192:154.0 203:2360.0 205:1683.0 207:1030.0 211:1093.0 213:48.0 214:50.0 217:2316.0 218:619.0 223:319.0 229:73.0 230:104.0 235:110.0 236:49.0 248:19.0 259:265.0 282:100.0 284:46.0 305:163.…						10589	9612	9884	9945	10633	6208	5742	10512	4318	6830	3684	9415	10098	10995	10341
377904	321723	174	377904	85:1781.0 86:3379.0 90:494.0 94:1540.0 100:6224.0 104:98.0 111:833.0 112:898.0 113:1168.0 114:683.0 119:224.0 125:908.0 130:2240.0 132:354.0 133:554.0 136:116.0 141:6966.0 142:1415.0 144:462.0 146:332.0 157:140.0 158:133.0 159:232.0 160:151.0 163:82.0 166:75.0 171:163.0 172:1621.0 174:7357.0 175:1432.0 176:740.0 177:90.0 183:63.0 185:121.0 206:55.0 212:674.0 213:100.0 214:45.0 259:37.0 284:91.0 3…						273268	331451	355665	350460	97080	125329	89486	235302	240189	224672	107588	295848	95505	63304	41554
377879	285859	201	377879	86:461.0 87:335.0 88:291.0 89:2045.0 91:540.0 100:1364.0 103:1982.0 109:125.0 110:143.0 112:127.0 117:10390.0 118:730.0 119:317.0 124:75.0 127:240.0 133:289.0 143:64.0 147:1304.0 155:92.0 169:114.0 186:435.0 187:631.0 189:311.0 195:187.0 201:1224.0 205:127.0 211:88.0 216:311.0 217:59.0 218:122.0 252:93.0 298:29.0 330:26.0 380:24.0 394:27.0 395:23.0 435:22.0						1052	1821	1383	1443	1430	1535	830	1588	1670	1288	803	1662	1060	884	1144
372445	781154	218	372445	86:1755.0 87:3093.0 88:1461.0 89:18036.0 90:1815.0 97:3742.0 99:4151.0 100:6417.0 101:13556.0 102:6368.0 103:71584.0 104:6824.0 105:10267.0 106:251.0 109:2785.0 112:661.0 113:2713.0 114:1300.0 115:3989.0 116:3007.0 117:42749.0 119:1819.0 127:4211.0 128:2266.0 129:65196.0 130:11982.0 131:10134.0 133:19136.0 134:2120.0 135:855.0 139:483.0 140:700.0 142:1958.0 143:10401.0 144:1350.0 146:777.0 147:10…						1389	1163	1444	1703	1235	1836	945	1356	1247	1497	1299	1179	895	1281	1161
371557	574934	305	371557	86:4640.0 89:9357.0 90:3786.0 91:2562.0 94:614.0 95:292.0 96:525.0 97:3875.0 100:7552.0 101:2857.0 102:3072.0 103:45271.0 104:4959.0 105:1691.0 106:439.0 107:295.0 108:175.0 113:3419.0 114:2434.0 118:3337.0 120:907.0 122:96.0 123:33.0 124:1161.0 125:265.0 127:2065.0 128:1370.0 130:3195.0 131:3175.0 132:448.0 134:1812.0 137:529.0 143:784.0 144:424.0 145:1324.0 146:948.0 148:11449.0 149:2722.0 152:…						1130	1088	1090	2187	3209	4291	5417	6041	5201	6054	7043	5597	2007	4353	3840
371546	680823	361	371546	85:28932.0 86:14914.0 87:27482.0 88:21174.0 89:221486.0 90:18670.0 91:26306.0 92:1070.0 93:1723.0 94:2098.0 95:4197.0 96:7059.0 97:12750.0 98:7425.0 99:30846.0 100:42226.0 101:102730.0 102:47834.0 103:421414.0 104:48795.0 105:48308.0 106:6153.0 107:3215.0 108:936.0 109:12471.0 110:9524.0 111:24593.0 112:9014.0 113:22704.0 114:18076.0 115:42070.0 116:44754.0 117:201831.0 118:29570.0 119:35485.0 12…						1132	953	795	1022	573	512	821	480	373	389	501	490	457	366	437
371262	773095	195	371262	85:3346.0 86:2172.0 87:2767.0 88:1248.0 89:7232.0 90:802.0 91:2250.0 92:606.0 93:3278.0 94:3150.0 95:3757.0 96:852.0 97:764.0 98:3943.0 99:3102.0 100:8658.0 101:2912.0 102:1637.0 103:9006.0 104:1205.0 105:1328.0 106:1066.0 107:1502.0 108:1185.0 109:16302.0 110:1915.0 111:2624.0 112:873.0 113:3092.0 114:1702.0 115:3165.0 116:2733.0 117:2529.0 118:596.0 119:1649.0 120:555.0 121:1478.0 122:470.0 123…						750	383	528	550	417	285	363	449	298	500	806	327	199	287	263
370223	773174	227	370223	85:2111.0 86:1654.0 87:1789.0 88:1245.0 89:2565.0 90:476.0 91:1360.0 92:383.0 93:1514.0 94:800.0 95:1372.0 96:438.0 97:912.0 98:1854.0 99:2007.0 100:4892.0 101:3095.0 102:1048.0 103:5417.0 104:559.0 105:1396.0 106:803.0 107:1281.0 108:663.0 109:8044.0 110:929.0 111:2940.0 112:889.0 113:3439.0 114:1312.0 115:2603.0 116:2148.0 117:2323.0 118:354.0 119:2058.0 120:315.0 121:1052.0 122:272.0 123:773.0…						8883	1784	5225	2471	4897	3886	3759	2243	1357	2177	7639	1870	3284	2139	1291
370158	625182	287	370158	85:1603.0 86:2348.0 87:2360.0 88:984.0 95:1050.0 96:1275.0 97:1681.0 98:1851.0 99:3668.0 101:2098.0 102:807.0 103:8787.0 104:993.0 105:2968.0 106:222.0 108:209.0 109:1574.0 110:148.0 111:1637.0 113:2717.0 115:8168.0 116:2073.0 117:7031.0 118:998.0 119:1860.0 123:196.0 124:359.0 125:2372.0 127:1049.0 129:9833.0 130:3354.0 131:9744.0 132:1801.0 133:15643.0 134:2399.0 135:1324.0 136:234.0 137:340.0 …						1540	1429	1897	1053	1572	1229	1432	3799	1513	971	673	2083	1891	1987	2029
362065	869053	204	362065	89:1964.0 91:1418.0 101:2727.0 102:356.0 103:22226.0 104:5976.0 105:98613.0 106:8436.0 113:485.0 115:833.0 116:1246.0 117:9230.0 129:13735.0 130:1275.0 131:2908.0 133:7265.0 143:4871.0 145:464.0 147:29688.0 148:3693.0 149:2662.0 157:922.0 159:400.0 161:769.0 169:1902.0 175:363.0 179:1539.0 189:8071.0 190:1996.0 191:6151.0 192:424.0 201:887.0 203:2213.0 204:169295.0 205:33437.0 206:13918.0 215:388…						64274	80955	79487	78122	76987	84446	51025	123220	73502	61711	42405	74395	69150	61391	63387
361168	907573	236	361168	85:3801.0 87:1339.0 88:865.0 89:14432.0 90:1348.0 95:2846.0 97:3090.0 99:2242.0 101:5707.0 103:126122.0 104:9754.0 107:6266.0 109:9731.0 110:644.0 112:508.0 113:3428.0 115:9164.0 116:5681.0 117:30177.0 118:3582.0 119:5589.0 129:103403.0 130:12001.0 131:3842.0 133:26831.0 135:6286.0 137:1711.0 140:334.0 142:171.0 143:15201.0 144:1412.0 145:6609.0 146:1022.0 147:112901.0 148:13468.0 149:20795.0 150…						1120	2421	3148	4292	1709	1015	1461	2504	3659	4229	1227	3727	3192	2378	2736
361146	1037685	345	361146	85:2383.0 87:2848.0 88:3536.0 89:7028.0 90:1139.0 91:6607.0 93:3124.0 94:1313.0 95:2204.0 99:1277.0 100:576.0 101:2679.0 102:7774.0 103:25572.0 104:1064.0 110:928.0 111:1072.0 112:568.0 113:2681.0 114:1062.0 115:6558.0 116:2124.0 118:1582.0 119:4001.0 120:1976.0 121:1133.0 123:1903.0 124:645.0 125:1403.0 126:538.0 127:2736.0 128:1977.0 129:7982.0 130:3003.0 131:8617.0 132:2149.0 133:17503.0 134:2…						7592	5688	6335	7441	3924	6311	3706	7245	4058	4731	1882	6986	3655	4945	4583
357450	459547	165	357450	91:200.0 92:330.0 93:11472.0 94:1023.0 95:4888.0 96:452.0 97:397.0 98:227.0 101:784.0 102:114.0 103:8315.0 104:817.0 107:321.0 109:133.0 111:100.0 112:53.0 113:190.0 115:424.0 121:235.0 123:1638.0 124:56.0 125:633.0 126:115.0 127:624.0 131:931.0 132:173.0 133:681.0 139:207.0 141:186.0 143:3163.0 144:301.0 147:2012.0 149:817.0 150:119.0 155:393.0 160:266.0 163:1810.0 164:279.0 165:9274.0 166:1077.…						8695	8673	9356	11771	5484	14325	7926	14066	18899	18734	10715	15435	12868	11586	11656
357404	441552	164	357404	85:1070.0 87:1098.0 88:558.0 89:294.0 91:552.0 92:638.0 93:21250.0 94:1905.0 95:19270.0 96:1309.0 97:4415.0 99:591.0 100:349.0 101:2829.0 102:750.0 103:11080.0 104:1091.0 105:1108.0 107:403.0 109:272.0 111:252.0 112:129.0 113:2134.0 114:277.0 115:2645.0 117:39081.0 118:4522.0 119:2950.0 120:349.0 121:361.0 122:44.0 123:723.0 124:140.0 125:382.0 127:498.0 128:173.0 129:1312.0 130:1545.0 131:1945.0…						96951	96372	106058	105588	74432	114935	61310	96575	104390	109102	78075	114985	92225	84612	82665
357024	910014	317	357024	85:2241.0 86:678.0 87:697.0 88:117.0 89:1024.0 90:177.0 91:3743.0 92:425.0 93:3809.0 94:898.0 95:4262.0 96:1025.0 97:844.0 98:201.0 99:921.0 101:2678.0 102:637.0 103:4334.0 104:452.0 105:1089.0 106:277.0 107:1375.0 108:381.0 109:14442.0 110:1299.0 111:1353.0 113:976.0 114:215.0 115:1213.0 116:1820.0 117:3839.0 118:640.0 119:4011.0 120:497.0 123:366.0 124:185.0 125:533.0 127:710.0 129:16706.0 130:…						4023	2586	4777	6061	1580	2800	3044	3905	4672	3273	1279	3515	2968	1155	2335
356941	343519	174	356941	85:2148.0 86:14705.0 87:983.0 88:1082.0 90:270.0 91:276.0 97:246.0 98:717.0 100:15183.0 101:3073.0 105:1231.0 109:934.0 113:214.0 114:1772.0 116:3005.0 117:23514.0 118:1247.0 119:2059.0 120:507.0 124:60.0 129:8268.0 130:2736.0 131:8240.0 132:6601.0 133:10428.0 135:1205.0 143:1044.0 144:516.0 145:2213.0 146:712.0 154:101.0 157:521.0 173:839.0 174:33984.0 175:6780.0 176:2036.0 180:145.0 181:514.0 1…						323804	363548	381410	365624	406240	320375	246225	429579	368936	328237	165989	415070	214234	199208	216437
356925	610264	145	356925	85:291.0 86:1097.0 87:1641.0 88:553.0 89:5534.0 90:316.0 91:160.0 97:156.0 100:510.0 101:2115.0 102:247.0 103:6871.0 104:755.0 105:576.0 106:61.0 108:99.0 111:250.0 113:179.0 114:3760.0 115:1803.0 116:2021.0 117:6637.0 118:756.0 119:1094.0 123:69.0 124:134.0 125:120.0 126:166.0 128:145.0 129:3594.0 130:673.0 131:1780.0 132:298.0 133:6570.0 134:835.0 135:998.0 137:146.0 138:38.0 139:71.0 140:108.0…						1232	2734	2128	1861	2699	2839	330	2375	2075	2379	1664	2447	2441	1897	1804
354265	471073	101	354265	85:4629.0 86:1684.0 87:720.0 88:1281.0 89:786.0 90:1956.0 91:1620.0 92:415.0 94:495.0 95:479.0 96:6420.0 97:1051.0 98:520.0 99:3348.0 101:26818.0 102:3233.0 104:1744.0 105:908.0 106:341.0 107:200.0 108:439.0 109:769.0 110:7797.0 111:1472.0 113:900.0 114:1518.0 115:1269.0 116:29945.0 117:5851.0 118:3134.0 119:593.0 120:265.0 121:357.0 123:158.0 124:107.0 126:807.0 127:1577.0 128:3832.0 129:6782.0 …						12151	16751	14583	14186	13029	12021	14309	17396	3984	14127	11128	17803	12247	11264	11717
353646	300145	117	353646	85:377.0 86:917.0 87:433.0 88:1019.0 89:390.0 90:331.0 91:341.0 92:243.0 93:214.0 95:218.0 96:1260.0 97:794.0 98:109.0 99:5471.0 100:5348.0 101:1410.0 102:508.0 103:773.0 105:299.0 108:52.0 109:539.0 110:4315.0 111:227.0 112:415.0 114:317.0 115:386.0 116:2339.0 117:16167.0 118:1776.0 119:791.0 120:197.0 121:128.0 122:96.0 123:190.0 124:2009.0 125:85.0 126:2644.0 127:913.0 129:371.0 130:1129.0 131…						8638	7233	11164	10887	5199	10623	5728	9016	10037	12127	6965	13367	8813	7507	9130
351727	1058177	293	351727	85:1409.0 89:501.0 90:291.0 91:1927.0 92:466.0 93:591.0 95:814.0 96:660.0 97:2538.0 98:372.0 99:334.0 100:185.0 103:3384.0 105:1068.0 107:966.0 108:453.0 109:742.0 110:340.0 111:2258.0 115:2451.0 116:257.0 117:412.0 119:466.0 120:423.0 121:895.0 123:188.0 124:87.0 125:867.0 127:382.0 128:240.0 130:809.0 131:478.0 133:925.0 135:1143.0 137:304.0 138:284.0 139:203.0 141:129.0 142:284.0 143:2451.0 14…						936	2718	1036	3889	1659	1478	408	864	2214	1333	272	1184	2928	1755	1518
351222	250484	245	351222	85:8116.0 92:1253.0 94:509.0 96:318.0 97:548.0 98:1550.0 99:11644.0 103:2632.0 105:1536.0 106:345.0 107:7115.0 108:1443.0 109:249.0 110:564.0 111:2036.0 112:394.0 113:3835.0 115:43380.0 116:17673.0 117:4269.0 124:105.0 125:695.0 126:917.0 127:7145.0 128:2134.0 129:1818.0 132:3958.0 138:126.0 139:3480.0 140:821.0 141:3018.0 142:1238.0 143:2019.0 144:1875.0 145:786.0 151:395.0 152:254.0 153:172.0 1…						1170	973	795	838	1530	1858	807	1062	1561	1703	1879	1971	1220	1652	2256
350340	485806	332	350340	87:2755.0 88:1642.0 89:4304.0 90:736.0 93:285.0 97:392.0 99:2157.0 101:8529.0 111:968.0 113:2437.0 117:49255.0 118:4891.0 119:2640.0 120:483.0 122:809.0 123:416.0 125:1025.0 126:476.0 127:1276.0 129:38185.0 130:2796.0 131:6987.0 132:255.0 133:18838.0 134:2802.0 135:2067.0 138:127.0 139:152.0 140:585.0 141:303.0 142:4468.0 143:2818.0 147:97130.0 148:16871.0 149:11830.0 150:2292.0 151:553.0 152:108…						529	651	545	440	1026	1109	675	836	840	579	631	502	1285	897	558
350273	1203488	361	350273	85:11925.0 86:4046.0 87:3463.0 88:3010.0 89:49508.0 90:3340.0 91:467.0 93:175.0 95:466.0 96:3034.0 97:6269.0 98:3879.0 99:11204.0 100:14929.0 101:32882.0 102:9023.0 103:285635.0 104:28238.0 105:14636.0 106:1788.0 107:1511.0 108:535.0 109:14977.0 110:6018.0 111:10887.0 112:4538.0 113:16965.0 114:4985.0 115:17998.0 116:18985.0 117:141865.0 118:14654.0 119:8688.0 120:2134.0 122:1004.0 123:1070.0 124…						3154	2564	1647	8041	2425	1463	1047	983	1358	1505	595	868	1381	1192	1217
349041	916402	284	349041	85:676.0 87:274.0 89:1238.0 90:135.0 91:293.0 93:98.0 94:96.0 96:154.0 97:231.0 98:130.0 99:391.0 100:187.0 101:932.0 102:97.0 103:4249.0 104:445.0 105:266.0 109:634.0 110:150.0 111:352.0 112:264.0 113:382.0 114:84.0 115:308.0 116:200.0 117:1830.0 118:316.0 119:377.0 121:227.0 123:105.0 125:136.0 126:135.0 127:295.0 129:4958.0 130:828.0 131:1110.0 132:142.0 133:2022.0 134:214.0 135:334.0 137:298.…						2532	1565	2327	2500	4692	4198	4842	5027	5679	6564	8969	6902	5695	5461	5228
348913	908097	204	348913	87:75.0 89:363.0 91:128.0 95:191.0 100:254.0 101:329.0 102:226.0 103:767.0 105:129.0 109:50.0 112:60.0 114:43.0 115:185.0 116:365.0 117:379.0 119:93.0 128:78.0 129:591.0 131:366.0 132:118.0 133:332.0 139:34.0 143:209.0 145:61.0 146:240.0 147:1035.0 148:162.0 149:144.0 157:189.0 159:470.0 160:82.0 161:50.0 163:70.0 166:48.0 169:178.0 172:31.0 185:70.0 187:33.0 188:148.0 189:160.0 197:218.0 198:124…						42365	31257	24577	27518	10526	10775	4584	11994	8068	10182	6324	7877	20919	12747	12477
347748	952169	395	347748	91:27139.0 92:6717.0 93:30097.0 94:14007.0 95:24994.0 96:5257.0 99:1249.0 103:34037.0 104:3531.0 105:12372.0 106:5356.0 107:11818.0 108:4703.0 109:7994.0 110:4595.0 117:3986.0 119:7799.0 120:3263.0 121:4906.0 122:3034.0 123:7278.0 124:2578.0 129:69561.0 130:3469.0 131:11172.0 133:8198.0 134:1355.0 135:3203.0 136:3423.0 137:3562.0 138:646.0 140:127.0 144:505.0 147:13678.0 148:3007.0 149:5988.0 150…						2111	1262	2264	2118	1528	2217	1604	1465	1495	1426	2312	726	1490	745	1295
346428	847001	259	346428	86:324.0 87:876.0 88:511.0 89:3117.0 90:272.0 94:113.0 97:2569.0 99:1272.0 101:8504.0 102:1345.0 103:27355.0 104:2540.0 105:1332.0 106:190.0 108:127.0 113:1054.0 114:171.0 115:2428.0 116:3308.0 117:12284.0 118:1438.0 119:1210.0 121:192.0 127:1074.0 129:37773.0 130:4628.0 131:3991.0 141:714.0 142:486.0 145:886.0 146:222.0 147:38683.0 148:5816.0 149:4606.0 150:652.0 154:199.0 155:925.0 157:2704.0 1…						554	324	767	1518	590	488	413	638	991	979	1146	1136	11841	12932	13198
346248	295999	132	346248	85:1647.0 86:4931.0 87:2070.0 89:35509.0 90:2224.0 91:1835.0 99:617.0 101:2888.0 102:5983.0 104:2949.0 105:234.0 106:363.0 111:46.0 115:2004.0 116:1029.0 118:304.0 119:2252.0 124:34.0 130:4557.0 131:842.0 132:100986.0 133:2260.0 135:374.0 138:66.0 142:1226.0 145:231.0 146:8.0 150:50.0 152:140.0 158:314.0 162:111.0 171:904.0 176:557.0 191:789.0 192:150.0 212:36.0 218:84.0 240:45.0 241:131.0 243:49…						5148	8388	7343	6629	8306	9620	4545	8057	9913	6428	5578	11584	8407	7596	8368
346241	326170	228	346241	86:1383.0 88:5484.0 89:15031.0 90:1776.0 91:1817.0 92:1183.0 93:254.0 94:688.0 96:113.0 100:3444.0 101:2956.0 102:397.0 103:7731.0 104:550.0 105:445.0 106:563.0 107:871.0 108:1656.0 110:49396.0 111:1516.0 113:487.0 114:716.0 115:1144.0 116:1785.0 117:8723.0 118:2092.0 119:1401.0 120:1147.0 121:877.0 123:554.0 127:1643.0 130:3146.0 131:3716.0 133:4170.0 134:11650.0 135:1320.0 136:8749.0 137:1349.0…						60146	81549	69625	82356	70819	111778	46739	70123	75635	72443	49691	90274	64750	61632	60726
346225	233552	131	346225	87:605.0 88:1704.0 91:234.0 95:161.0 99:165.0 101:1334.0 106:122.0 107:235.0 110:409.0 113:104.0 115:1769.0 116:643.0 117:1340.0 118:393.0 119:148.0 126:196.0 127:496.0 130:723.0 131:51039.0 132:5733.0 133:4802.0 134:853.0 135:334.0 143:1091.0 144:244.0 145:406.0 147:14278.0 148:2431.0 149:1565.0 150:156.0 189:168.0 201:65.0 233:539.0 234:162.0						51483	49297	57530	59317	34780	56660	29572	49720	72820	80194	47363	75371	45295	41898	45489
342949	557920	191	342949	86:287.0 87:206.0 94:165.0 98:523.0 100:1497.0 101:202.0 103:1557.0 112:183.0 115:859.0 116:190.0 117:341.0 118:296.0 119:363.0 120:807.0 126:192.0 128:578.0 129:1175.0 130:237.0 131:731.0 133:1343.0 134:65.0 139:117.0 141:93.0 142:505.0 143:148.0 144:332.0 147:7596.0 148:1155.0 149:720.0 150:98.0 151:144.0 154:49.0 157:256.0 158:313.0 159:104.0 163:75.0 167:83.0 168:33.0 172:317.0 182:63.0 184:3…						2767	2694	1734	2246	3958	3143	2271	2901	2541	2604	1487	4308	2930	2432	2165
342714	919829	284	342714	85:5465.0 86:763.0 87:3526.0 88:1333.0 89:25332.0 90:2819.0 91:3687.0 92:867.0 93:1540.0 94:742.0 95:2483.0 96:924.0 97:2171.0 98:846.0 99:5345.0 100:1068.0 101:11902.0 102:2588.0 103:75997.0 104:5933.0 105:5670.0 107:1072.0 108:53.0 109:6042.0 110:913.0 111:4071.0 112:2605.0 113:4855.0 114:1035.0 115:4946.0 116:4371.0 117:27761.0 118:3451.0 119:4985.0 120:977.0 121:2237.0 122:428.0 123:1128.0 12…						5265	5676	5563	10653	5189	6390	2637	3407	8576	9591	5619	12021	6976	6608	5837
341633	603817	319	341633	86:1925.0 87:3155.0 88:977.0 89:46380.0 90:1908.0 100:4288.0 101:12318.0 102:2089.0 103:19699.0 104:2346.0 105:599.0 106:568.0 114:2793.0 115:2847.0 116:3415.0 117:42168.0 118:3805.0 119:3888.0 121:218.0 128:9153.0 129:3694.0 130:938.0 131:4209.0 132:2358.0 133:31614.0 134:3298.0 135:2906.0 140:1961.0 141:380.0 143:1634.0 145:2510.0 147:65335.0 148:8010.0 149:6129.0 156:1049.0 158:909.0 159:1776.…						34588	35943	20597	50824	33310	49707	30726	28528	41249	22758	20417	8501	29917	27004	27933
341252	868182	173	341252	85:960.0 86:531.0 87:1115.0 88:845.0 89:13441.0 90:1226.0 91:678.0 92:223.0 93:136.0 94:348.0 95:150.0 96:382.0 97:294.0 98:729.0 99:1215.0 100:2539.0 101:9166.0 102:1742.0 103:50820.0 104:5027.0 105:3331.0 106:345.0 109:94.0 110:481.0 111:296.0 112:283.0 113:1671.0 114:1592.0 115:1455.0 116:1711.0 117:13414.0 118:1560.0 119:1766.0 120:195.0 121:128.0 122:107.0 124:323.0 125:139.0 126:675.0 127:3…						1609	1991	2026	1756	1317	1725	1240	1454	1825	1455	633	2167	1564	1383	1614
334654	833937	204	334654	89:254.0 90:194.0 91:13772.0 92:1093.0 101:430.0 103:1930.0 105:570.0 107:231.0 115:190.0 116:305.0 117:1133.0 129:1171.0 130:304.0 131:558.0 133:637.0 141:104.0 143:467.0 147:1743.0 148:455.0 149:397.0 150:106.0 157:156.0 159:90.0 160:68.0 161:156.0 167:67.0 169:318.0 173:312.0 174:64.0 179:118.0 187:52.0 189:991.0 190:215.0 191:364.0 192:120.0 193:432.0 195:133.0 203:211.0 204:11325.0 205:2048.…						30871	39423	36992	38698	34941	47138	25023	40140	50975	37891	13038	47205	38444	34145	36594
330432	751978	100	330432	85:671.0 87:385.0 88:549.0 89:2523.0 90:227.0 91:510.0 95:98.0 98:370.0 99:456.0 100:21706.0 101:7665.0 102:948.0 103:9362.0 104:537.0 105:759.0 109:54.0 111:238.0 112:162.0 113:501.0 114:408.0 115:110.0 116:1241.0 117:4394.0 118:351.0 125:166.0 128:105.0 129:4805.0 131:1739.0 132:1130.0 133:3364.0 134:274.0 135:736.0 136:106.0 141:330.0 142:343.0 143:727.0 144:232.0 145:792.0 147:7407.0 148:1919…						2312	2647	3294	3199	3121	2738	1768	1921	2356	2096	1638	2967	2352	2353	2194
330287	921525	259	330287	85:380.0 86:322.0 87:875.0 88:341.0 89:3840.0 90:671.0 91:182.0 94:222.0 95:314.0 97:2602.0 98:637.0 99:1325.0 100:730.0 101:8332.0 102:1547.0 103:17832.0 104:2148.0 105:2369.0 106:306.0 111:418.0 112:90.0 113:1000.0 114:1098.0 115:2825.0 116:5241.0 117:10245.0 118:896.0 119:981.0 122:97.0 123:90.0 127:389.0 128:355.0 129:13228.0 130:3179.0 131:4495.0 132:743.0 133:8148.0 134:1531.0 135:1025.0 13…						5812	6518	5835	7568	5970	5704	1777	6078	5769	6192	4273	5603	5767	4887	2689
329363	911707	173	329363	86:272.0 91:686.0 93:804.0 94:144.0 95:1161.0 96:467.0 99:320.0 101:693.0 103:4128.0 107:600.0 110:255.0 111:171.0 116:469.0 117:613.0 118:299.0 120:114.0 121:210.0 123:68.0 129:1806.0 132:398.0 135:446.0 142:126.0 143:355.0 147:6979.0 148:762.0 149:445.0 150:186.0 151:169.0 152:200.0 155:684.0 157:317.0 159:167.0 162:71.0 166:83.0 167:99.0 169:106.0 173:10748.0 174:1508.0 175:327.0 179:112.0 185…						14609	12278	15292	16692	12095	8290	9321	14056	5389	9907	5152	10928	12868	8334	9377
325493	599872	312	325493	85:8167.0 86:794.0 87:3834.0 88:2409.0 91:25869.0 92:4607.0 93:5162.0 94:434.0 95:13370.0 96:2937.0 97:12501.0 98:3376.0 101:8505.0 105:14250.0 106:3849.0 107:4848.0 108:343.0 109:1716.0 110:4731.0 111:1539.0 112:33266.0 113:3649.0 116:18082.0 117:7880.0 119:7675.0 120:3437.0 121:5570.0 122:1054.0 123:8981.0 135:20618.0 136:3035.0 137:5483.0 138:4414.0 140:5977.0 141:6055.0 147:49842.0 148:7848.0…						4321	6929	6085	8201	5264	7951	4759	6975	8835	9296	4694	13800	4405	4284	4474
324891	572451	158	324891	86:221.0 87:232.0 88:189.0 89:1745.0 90:158.0 91:118.0 93:7.0 94:67.0 95:72.0 96:27.0 97:96.0 98:135.0 99:285.0 100:1217.0 101:1152.0 102:274.0 103:2964.0 104:339.0 105:342.0 106:3.0 109:23.0 110:247.0 111:194.0 112:104.0 113:79.0 114:488.0 115:607.0 116:481.0 117:1197.0 118:167.0 119:281.0 125:142.0 126:88.0 127:257.0 128:576.0 129:2655.0 130:920.0 131:810.0 132:135.0 133:1302.0 134:85.0 135:141…						977	2644	2991	2092	1597	1582	4868	2413	1787	2429	2620	2070	2506	3432	3922
324863	586387	204	324863	85:890.0 86:596.0 87:788.0 88:346.0 89:3121.0 90:227.0 91:139.0 92:92.0 93:19.0 94:113.0 95:220.0 96:469.0 97:752.0 98:353.0 99:728.0 100:653.0 101:8644.0 102:1256.0 103:3303.0 104:403.0 105:668.0 106:162.0 107:30.0 108:18.0 109:150.0 110:420.0 111:320.0 112:621.0 113:443.0 114:689.0 115:775.0 116:11497.0 117:2237.0 118:651.0 119:640.0 120:28.0 121:67.0 122:25.0 123:32.0 124:471.0 125:173.0 126:3…						4063	4950	1517	3759	1257	1456	10463	3996	3131	4843	4378	3582	3920	6016	1923
324860	885827	138	324860	86:68.0 89:775.0 91:1.0 94:29.0 97:181.0 98:1.0 101:390.0 102:57.0 103:4630.0 104:434.0 105:187.0 106:895.0 107:1206.0 108:320.0 109:38.0 110:10.0 111:1704.0 112:94.0 113:43.0 116:218.0 117:1001.0 119:194.0 120:1.0 121:14.0 122:64.0 123:812.0 124:182.0 127:4.0 129:1225.0 130:77.0 131:97.0 133:603.0 135:43.0 138:13211.0 139:1298.0 140:39.0 141:13.0 142:305.0 143:200.0 145:212.0 147:3158.0 148:441.…						1915	1043	1812	1474	1094	1010	1746	1119	998	1012	3122	967	659	771	689
324858	882627	138	324858	85:31.0 86:299.0 87:151.0 88:29.0 89:878.0 90:84.0 92:53.0 93:53.0 94:146.0 96:148.0 97:362.0 98:79.0 99:63.0 100:24.0 101:814.0 102:44.0 103:7285.0 104:653.0 105:337.0 106:1275.0 107:1625.0 108:547.0 109:106.0 111:1605.0 112:132.0 113:56.0 114:13.0 115:189.0 116:338.0 117:1432.0 118:221.0 119:227.0 120:127.0 122:171.0 123:1244.0 124:425.0 125:62.0 126:46.0 128:174.0 129:2144.0 130:284.0 131:488.…						3484	1886	2390	1635	1759	1600	5367	1390	659	1171	3768	1138	925	825	820
324219	282912	151	324219	86:138.0 87:528.0 88:692.0 89:349.0 90:95.0 91:257.0 92:302.0 93:7132.0 94:640.0 95:2221.0 97:164.0 99:66.0 102:70.0 103:717.0 105:182.0 106:68.0 107:30.0 109:445.0 110:1055.0 113:83.0 115:2328.0 116:280.0 117:1284.0 119:595.0 121:21.0 122:29.0 123:2954.0 125:1278.0 127:152.0 129:43.0 131:632.0 132:132.0 133:8924.0 135:1145.0 137:306.0 138:56.0 141:25.0 145:109.0 147:1785.0 148:188.0 149:104.0 15…						4237	3486	5069	4472	3791	5338	3057	5715	3436	4386	2473	6043	4779	2653	2843
323703	1231109	204	323703	85:408.0 88:302.0 89:3505.0 99:643.0 100:800.0 101:3027.0 102:890.0 103:12459.0 104:589.0 105:2078.0 109:180.0 113:395.0 115:500.0 116:1151.0 117:5704.0 118:516.0 119:388.0 121:164.0 123:150.0 128:252.0 129:16338.0 130:1361.0 131:1377.0 132:392.0 133:2588.0 136:237.0 141:274.0 142:759.0 143:2610.0 144:454.0 145:958.0 147:15449.0 148:1535.0 149:1292.0 154:192.0 155:2570.0 156:233.0 157:2296.0 158:…						34840	43341	36306	48532	22863	14242	14759	19157	28545	28132	26231	42874	19750	9366	15225
321458	422612	217	321458	85:197.0 86:106.0 87:181.0 89:93.0 98:43.0 99:169.0 101:675.0 102:130.0 103:744.0 104:85.0 105:77.0 111:102.0 112:33.0 113:159.0 114:26.0 115:364.0 116:187.0 117:361.0 118:72.0 119:174.0 127:1672.0 128:139.0 129:949.0 130:318.0 131:731.0 132:87.0 133:1167.0 134:172.0 135:160.0 141:29.0 142:1349.0 143:892.0 144:204.0 145:165.0 146:60.0 147:3695.0 148:647.0 149:381.0 150:42.0 151:58.0 155:50.0 159:…						5342	5311	4853	6140	6407	8347	4016	7264	7975	8279	2419	6667	7061	7923	8349
317264	509524	217	317264	85:296.0 89:889.0 95:467.0 98:1340.0 99:2017.0 103:8156.0 113:1072.0 114:140.0 115:1849.0 117:1178.0 119:407.0 120:133.0 123:199.0 125:230.0 127:830.0 129:6168.0 130:1012.0 132:331.0 133:2621.0 134:459.0 139:168.0 142:600.0 143:512.0 144:771.0 147:4289.0 148:2115.0 155:623.0 157:646.0 158:508.0 171:194.0 173:143.0 175:2006.0 177:463.0 185:408.0 187:354.0 189:604.0 199:58.0 210:78.0 213:497.0 215:…						1329	2407	1613	2973	3524	4395	1719	2812	4512	3484	2563	4007	9589	11157	11344
317190	860251	435	317190	85:1357.0 86:720.0 87:682.0 89:9097.0 90:899.0 97:377.0 100:3438.0 101:2181.0 102:2391.0 103:18136.0 104:778.0 105:1849.0 106:244.0 113:241.0 114:6997.0 115:1093.0 117:2781.0 118:756.0 119:1801.0 122:267.0 123:243.0 129:5260.0 130:2547.0 133:12866.0 134:1683.0 135:202.0 140:393.0 142:1292.0 143:7508.0 147:42820.0 148:8946.0 149:5070.0 157:693.0 160:236.0 161:471.0 163:886.0 169:745.0 170:1109.0 1…						813	706	639	852	361	833	459	498	705	688	278	596	771	615	811
250811	642967	204	250811	85:4806.0 86:1602.0 87:6937.0 88:1922.0 89:62768.0 90:4961.0 91:3297.0 94:670.0 95:669.0 97:1409.0 98:718.0 99:5459.0 101:22611.0 102:3589.0 103:43025.0 104:4046.0 105:3983.0 106:588.0 107:159.0 109:1858.0 110:319.0 111:4046.0 112:107.0 113:4116.0 115:6038.0 116:24589.0 117:50345.0 118:6022.0 119:7551.0 120:752.0 121:244.0 123:100.0 125:515.0 127:2169.0 128:783.0 129:63270.0 130:7879.0 131:39584.…						93579	121943	133350	59745	84262	58250	256348	81597	66102	95126	91224	58057	58502	52395	55465
228372	900924	409	228372	101:207.0 117:298.0 118:104.0 122:22.0 123:20.0 131:157.0 132:62.0 133:101.0 137:28.0 144:96.0 147:1124.0 149:115.0 153:35.0 160:26.0 171:101.0 178:40.0 205:61.0 218:40.0 219:58.0 231:48.0 232:21.0 236:26.0 237:25.0 239:70.0 269:59.0 271:10.0 282:66.0 291:23.0 293:26.0 298:28.0 303:26.0 311:22.0 319:80.0 320:16.0 325:39.0 332:12.0 352:26.0 379:39.0 396:18.0 408:275.0 409:543.0 410:264.0 412:25.0						2070	1919	1734	1482	1659	1311	841	1205	838	795	371	982	1234	979	980
224147	938658	174	224147	86:1118.0 103:3583.0 113:33.0 142:81.0 143:24.0 153:71.0 168:66.0 174:3694.0 175:605.0 176:245.0 177:86.0 202:40.0 204:127.0 210:36.0 220:31.0 240:46.0 244:67.0 262:37.0 280:31.0 287:31.0 288:21.0 294:29.0 306:23.0 308:43.0 314:19.0 319:20.0 328:62.0 329:20.0 333:30.0 334:20.0 338:47.0 339:57.0 341:31.0 359:27.0 385:22.0 440:30.0 442:14.0 450:22.0 453:46.0 454:19.0 477:21.0 484:29.0 485:62.0 486:…						3071	4545	5618	1765	1261	2037	1084	1461	1164	1429	527	1214	7055	6046	5464
219397	953913	174	219397	86:1375.0 87:82.0 95:45.0 99:55.0 100:639.0 101:99.0 102:65.0 103:148.0 112:92.0 114:63.0 140:21.0 141:23.0 142:56.0 143:45.0 153:39.0 154:54.0 158:113.0 168:48.0 170:67.0 171:83.0 172:113.0 173:39.0 174:3764.0 175:597.0 176:208.0 179:24.0 183:34.0 196:22.0 198:7.0 200:85.0 202:9.0 211:17.0 221:53.0 226:20.0 314:20.0 326:13.0 339:17.0 385:127.0 386:50.0 387:7.0 398:9.0 428:9.0 456:233.0 457:116.0…						1115	1658	1351	1214	1007	1051	932	942	708	889	732	846	4020	2578	1985
213020	926817	204	213020	85:243.0 87:100.0 91:147.0 92:57.0 94:46.0 97:19.0 98:81.0 99:179.0 100:281.0 101:1043.0 102:219.0 105:107.0 106:73.0 107:33.0 110:17.0 111:244.0 113:34.0 115:641.0 116:642.0 117:598.0 118:57.0 119:87.0 120:104.0 123:20.0 124:80.0 126:18.0 127:18.0 129:435.0 130:811.0 131:551.0 132:136.0 133:358.0 134:36.0 136:64.0 139:43.0 140:332.0 141:146.0 142:180.0 143:1255.0 144:261.0 145:70.0 146:106.0 147…						6897	6762	5897	9875	5379	4468	3980	7319	7366	5854	4232	7647	5130	6788	7238
211045	854932	217	211045	89:229.0 91:504.0 93:51.0 99:45.0 101:166.0 102:50.0 103:584.0 104:89.0 105:327.0 111:107.0 113:151.0 115:172.0 117:505.0 118:103.0 119:1030.0 120:275.0 121:57.0 125:27.0 127:164.0 129:710.0 131:295.0 133:641.0 134:103.0 143:368.0 147:2594.0 148:209.0 149:409.0 150:92.0 151:28.0 157:71.0 159:39.0 163:141.0 175:40.0 177:74.0 189:124.0 191:357.0 192:45.0 193:977.0 194:148.0 195:36.0 197:22.0 203:15…						3928	5010	3562	5022	4063	4553	3765	2804	2578	2788	6672	3106	12874	13601	10452
210682	415455	305	210682	85:251.0 86:138.0 87:1019.0 88:80.0 89:347.0 91:130.0 96:69.0 97:50.0 98:47.0 99:727.0 100:35.0 101:288.0 102:129.0 103:1141.0 104:120.0 105:362.0 106:76.0 108:55.0 110:40.0 112:35.0 113:272.0 115:668.0 116:203.0 117:626.0 118:105.0 119:539.0 120:64.0 121:76.0 124:20.0 126:136.0 127:217.0 128:39.0 129:538.0 130:292.0 132:181.0 133:4887.0 134:789.0 135:531.0 136:33.0 137:30.0 141:33.0 142:40.0 143…						730	1004	808	1121	842	1822	748	1255	1052	1288	708	1248	1194	1135	1512
210350	559153	204	210350	85:398.0 88:83.0 97:68.0 99:71.0 101:211.0 105:53.0 116:50.0 129:149.0 133:223.0 189:11.0 204:477.0 281:1.0						3566	8203	5609	10128	10515	7253	3169	4764	11553	5498	1552	9762	7208	9953	10279
210313	565988	217	210313	88:83.0 89:337.0 95:106.0 99:68.0 100:88.0 103:2325.0 104:193.0 116:75.0 117:950.0 129:803.0 130:183.0 133:510.0 134:58.0 139:25.0 141:26.0 142:7.0 146:56.0 157:80.0 170:16.0 183:59.0 189:98.0 191:97.0 204:81.0 205:456.0 217:1739.0 218:249.0 219:24.0 221:37.0 243:100.0 307:24.0 319:23.0						9316	13090	9670	15442	9306	11851	10739	10326	11884	11544	6092	16976	17631	26599	25608
210305	957101	217	210305	85:140.0 86:361.0 87:667.0 88:649.0 89:6259.0 90:455.0 91:429.0 94:110.0 97:855.0 99:827.0 100:1795.0 101:3774.0 102:1099.0 103:24618.0 104:2410.0 105:2122.0 107:158.0 109:572.0 110:59.0 111:773.0 112:25.0 113:558.0 114:428.0 115:1133.0 116:1576.0 117:5297.0 118:619.0 119:1076.0 120:43.0 123:65.0 126:228.0 127:391.0 128:262.0 129:10437.0 130:1825.0 131:2971.0 132:315.0 133:7531.0 134:847.0 135:41…						44423	23961	45025	74463	40883	52923	42969	51490	73238	75404	25972	66417	46439	38594	40042
210297	931518	217	210297	85:265.0 87:206.0 88:190.0 89:2271.0 90:198.0 91:122.0 93:56.0 95:65.0 96:137.0 99:253.0 100:339.0 101:896.0 102:192.0 103:11470.0 104:1100.0 105:698.0 108:51.0 111:255.0 113:386.0 114:444.0 115:115.0 116:237.0 117:3166.0 118:411.0 119:419.0 120:71.0 121:55.0 123:46.0 124:55.0 125:82.0 126:153.0 127:181.0 128:260.0 129:3381.0 130:472.0 131:1121.0 132:175.0 133:2484.0 134:227.0 135:142.0 136:55.0 …						32191	31917	28136	29713	27699	28842	36203	15329	18597	14458	22046	27968	29013	7964	27726
210289	892001	217	210289	85:546.0 87:73.0 88:26.0 89:518.0 90:136.0 91:67.0 92:20.0 93:18.0 95:278.0 96:32.0 99:531.0 100:77.0 101:803.0 102:263.0 103:5016.0 104:333.0 105:175.0 107:56.0 109:951.0 110:203.0 111:455.0 112:111.0 113:476.0 115:370.0 116:63.0 117:911.0 119:226.0 123:59.0 127:399.0 128:43.0 129:5964.0 130:596.0 131:1188.0 133:1832.0 134:265.0 135:99.0 139:170.0 140:132.0 141:129.0 142:359.0 143:1381.0 144:255…						3856	7937	4377	6006	2946	6128	4693	4948	6087	1421	1653	8331	31398	36681	38834
210281	923632	360	210281	213:1266.0 216:3345.0 217:652739.0 218:152778.0 219:74867.0 220:11456.0 221:23643.0 222:4628.0 223:2915.0 224:1382.0 225:1274.0 227:13490.0 228:5121.0 229:55614.0 230:80616.0 231:32826.0 232:12289.0 233:7058.0 237:1061.0 239:1616.0 240:843.0 241:19477.0 242:6779.0 243:210718.0 245:66599.0 246:8731.0 253:1266.0 254:1451.0 255:10167.0 256:5695.0 257:54510.0 258:13736.0 259:27809.0 260:6486.0 261:41…						972	465	703	968	480	944	631	331	809	1128	655	1158	399	475	420
210272	700671	220	210272	86:9319.0 89:171596.0 90:14667.0 91:17916.0 94:766.0 95:1161.0 97:8463.0 98:3475.0 99:12666.0 100:145403.0 101:75879.0 102:57843.0 104:17992.0 105:27190.0 106:4447.0 107:1338.0 108:758.0 109:1485.0 110:1347.0 111:10858.0 112:3583.0 113:19610.0 115:29860.0 116:43047.0 117:86611.0 118:13704.0 119:22647.0 120:3167.0 121:2178.0 122:659.0 123:598.0 124:1151.0 125:3035.0 126:5764.0 127:13452.0 128:1317…						1252	2976	4331	3116	3933	3440	4759	5613	3419	3518	2491	4156	2511	3070	2996
210267	905978	231	210267	85:1849.0 87:727.0 88:1941.0 89:1515.0 92:101.0 93:146.0 95:499.0 97:709.0 99:2371.0 100:268.0 101:2604.0 102:685.0 103:39971.0 104:3658.0 109:1761.0 111:2037.0 112:184.0 113:1848.0 114:646.0 115:550.0 116:1020.0 117:11024.0 118:1208.0 119:671.0 120:133.0 123:118.0 125:611.0 127:775.0 128:261.0 129:23022.0 130:3986.0 131:5208.0 132:937.0 133:7654.0 134:289.0 135:1134.0 136:101.0 138:40.0 139:516.…						1219	1552	1893	1713	829	705	956	1369	2066	999	464	1091	1267	623	914
208244	1003869	204	208244	85:930.0 89:1261.0 95:363.0 99:896.0 100:199.0 101:3294.0 102:1216.0 103:19491.0 104:1647.0 105:2782.0 109:194.0 111:705.0 113:875.0 115:1255.0 116:981.0 117:2805.0 118:440.0 119:381.0 121:191.0 127:989.0 129:21897.0 130:2798.0 131:2580.0 133:7188.0 134:912.0 135:967.0 136:41.0 139:329.0 141:220.0 142:363.0 143:5740.0 144:618.0 145:363.0 146:365.0 147:31679.0 148:6284.0 149:3963.0 150:481.0 151:2…						22014	38321	2675	32423	23533	34952	22504	28058	53358	46611	34003	61334	33775	30287	32185
206559	1192216	217	206559	85:3171.0 86:603.0 87:2021.0 88:1900.0 89:3819.0 90:371.0 91:742.0 92:184.0 93:333.0 94:271.0 95:985.0 96:450.0 97:1825.0 98:492.0 99:3087.0 100:606.0 101:5265.0 102:2060.0 103:69875.0 104:6670.0 105:3511.0 106:315.0 107:362.0 108:161.0 109:6446.0 110:540.0 111:3956.0 112:665.0 113:2810.0 114:637.0 115:3305.0 116:2028.0 117:13947.0 118:1312.0 119:1938.0 120:227.0 121:296.0 122:76.0 123:246.0 124:…						8020	7127	7312	13488	4913	8139	5571	9408	11142	11571	4286	14611	7528	3960	5500
191804	344820	158	191804	86:340.0 94:81.0 96:484.0 97:39.0 98:9504.0 99:557.0 100:769.0 102:1237.0 112:6.0 114:3.0 116:147.0 125:2.0 126:15.0 127:11.0 128:60.0 130:234.0 132:98.0 140:8.0 142:63.0 144:35.0 155:9.0 156:15.0 158:5330.0 159:680.0 160:175.0 170:15.0 171:4.0 172:27.0 179:94.0 184:39.0 188:6.0 200:66.0 201:6.0 215:2.0 232:140.0 233:16.0 236:1.0 237:2.0 258:1.0 260:20.0 261:3.0 262:26.0 265:1.0 266:2.0 269:2.0 2…						14642	11945	9983	10794	22220	15083	12632	15802	12113	13926	6980	23704	8125	8319	9401
190197	1237271	204	190197	99:38.0 109:6.0 123:2.0 125:26.0 129:459.0 143:91.0 151:9.0 157:14.0 159:39.0 162:8.0 169:65.0 170:14.0 171:40.0 173:36.0 189:97.0 191:182.0 192:41.0 193:245.0 194:145.0 204:1738.0 205:333.0 206:128.0 207:199.0 208:102.0 209:50.0 213:8.0 217:512.0 219:12.0 220:6.0 221:125.0 222:36.0 243:21.0 247:2.0 251:86.0 253:14.0 257:17.0 265:38.0 267:39.0 271:62.0 273:28.0 278:7.0 280:20.0 281:174.0 282:49.0…						4618	7108	6292	10043	10379	7841	6548	8813	16055	15856	12082	21355	7042	8023	8663
190001	1066955	361	190001	85:46.0 87:95.0 89:330.0 90:9.0 99:105.0 101:388.0 103:3818.0 104:370.0 109:325.0 113:129.0 114:37.0 115:49.0 116:117.0 117:1070.0 118:55.0 119:401.0 127:95.0 129:4930.0 130:407.0 131:1700.0 132:79.0 133:960.0 135:157.0 139:75.0 141:31.0 142:4.0 143:567.0 144:1164.0 145:171.0 147:5897.0 148:792.0 149:800.0 150:70.0 151:17.0 153:58.0 155:860.0 156:101.0 157:570.0 158:25.0 159:29.0 161:112.0 163:28…						6249	1873	3031	2872	3628	4054	1575	1806	2684	2718	811	2560	3542	3092	2846
189290	683276	102	189290	85:490.0 86:121.0 87:296.0 89:532.0 90:19.0 91:16.0 94:5.0 95:498.0 96:101.0 98:23.0 99:533.0 101:1112.0 102:6053.0 104:42.0 105:237.0 106:12.0 109:17.0 110:21.0 111:679.0 112:239.0 113:663.0 114:151.0 115:671.0 116:495.0 117:1009.0 118:45.0 119:933.0 120:129.0 121:42.0 123:42.0 125:87.0 126:311.0 127:1189.0 128:207.0 129:3641.0 130:4534.0 131:3316.0 132:692.0 133:7743.0 134:719.0 135:737.0 136:3…						1371	1919	1660	657	1412	1293	1296	1240	1164	1714	1346	1668	1274	1483	1464
189241	1054576	317	189241	85:553.0 86:63.0 89:1413.0 90:100.0 91:16.0 95:10.0 97:213.0 98:11.0 99:214.0 100:294.0 101:617.0 102:40.0 103:1574.0 104:131.0 105:204.0 111:2300.0 112:102.0 113:245.0 114:76.0 115:172.0 116:554.0 117:428.0 121:90.0 127:113.0 129:1273.0 130:310.0 131:600.0 133:753.0 135:46.0 141:44.0 142:39.0 143:1504.0 144:5.0 146:135.0 147:1599.0 148:20.0 149:213.0 156:70.0 157:276.0 158:63.0 159:667.0 160:451…						6296	3871	5873	5155	3924	3182	1170	5999	5577	4052	922	5931	4611	2653	3760
188968	708915	292	188968	100:110.0 101:210.0 102:1310.0 103:516.0 106:196.0 114:1.0 117:29.0 129:2186.0 130:1286.0 133:7.0 143:15.0 147:1810.0 148:160.0 149:367.0 153:82.0 155:3.0 157:1030.0 158:77.0 161:50.0 169:68.0 171:6.0 172:44.0 174:33.0 177:39.0 186:35.0 189:252.0 191:484.0 193:1.0 197:42.0 199:3.0 202:36.0 204:16.0 205:77.0 216:25.0 217:460.0 218:221.0 219:139.0 220:516.0 221:171.0 222:28.0 223:237.0 226:25.0 227…						35613	34086	45904	30918	41471	22821	29144	63985	26665	29802	9194	41306	23672	29365	27641
187859	958314	383	187859	85:9943.0 86:1219.0 89:1514.0 90:42.0 91:12326.0 92:1051.0 94:429.0 95:11507.0 96:1610.0 97:22372.0 98:1703.0 99:2293.0 100:411.0 101:5866.0 103:27661.0 104:2015.0 109:3436.0 110:138.0 111:11587.0 112:1419.0 113:15.0 114:416.0 115:1662.0 116:490.0 117:2899.0 121:502.0 122:319.0 123:1734.0 124:491.0 125:1826.0 126:104.0 129:11797.0 130:405.0 133:8939.0 134:2314.0 137:625.0 138:174.0 139:1291.0 143…						7264	8480	6659	16537	6531	10838	3174	5432	8510	8633	2391	8259	12747	13789	13073
171564	664278	319	171564	85:2761.0 86:3346.0 87:4228.0 88:2103.0 89:31879.0 90:2123.0 91:1214.0 92:322.0 94:363.0 97:1045.0 98:901.0 99:2436.0 100:6060.0 101:8894.0 102:4115.0 103:50203.0 104:4606.0 105:11919.0 106:1065.0 107:316.0 108:116.0 110:513.0 111:514.0 112:1021.0 113:2200.0 114:4299.0 115:3545.0 116:2488.0 117:38102.0 118:4525.0 119:4119.0 120:510.0 123:43.0 124:103.0 126:858.0 127:1005.0 128:1579.0 129:38424.0 …						60163	64226	51267	76333	65841	68824	44888	79330	71602	60935	31358	79944	51084	43716	47107
170275	834701	217	170275	87:124.0 88:77.0 89:1244.0 90:205.0 93:153.0 94:141.0 97:1375.0 99:198.0 100:421.0 103:5820.0 104:453.0 105:795.0 106:312.0 107:415.0 108:163.0 110:115.0 111:167.0 113:441.0 114:733.0 115:466.0 116:357.0 117:2430.0 118:342.0 119:529.0 121:130.0 125:78.0 128:56.0 129:1248.0 130:524.0 131:492.0 132:502.0 133:1205.0 134:34.0 135:161.0 142:115.0 143:267.0 144:183.0 145:284.0 146:90.0 147:4839.0 148:8…						6642	7774	7963	7926	7145	9644	2157	8884	11638	7455	2721	10767	7514	8252	1370
163575	801371	91	163575	85:84.0 89:36.0 90:306.0 91:17172.0 92:3581.0 93:5934.0 94:4621.0 95:2697.0 96:383.0 97:504.0 98:133.0 100:62.0 102:233.0 103:1004.0 104:1497.0 105:4792.0 106:2256.0 107:2315.0 108:4189.0 109:1381.0 110:162.0 111:247.0 112:167.0 113:38.0 114:131.0 115:1513.0 116:867.0 117:2810.0 118:1429.0 119:3157.0 120:1190.0 121:1092.0 122:520.0 123:263.0 124:84.0 125:146.0 127:401.0 128:1056.0 129:476.0 130:5…						8447	12627	12043	13070	13726	15590	7740	13669	9736	12635	6379	10970	13442	12843	11525
161389	947560	243	161389	85:67727.0 86:9314.0 87:31621.0 88:11708.0 89:89918.0 90:11972.0 91:12611.0 92:1664.0 93:4722.0 94:4190.0 95:12626.0 96:2185.0 97:31559.0 98:6615.0 99:55399.0 100:10494.0 101:160120.0 102:31925.0 103:2061982.0 104:205177.0 105:102633.0 106:6034.0 107:4416.0 108:2400.0 109:121830.0 110:10877.0 111:43135.0 112:6263.0 113:99495.0 114:32098.0 115:72894.0 116:88457.0 117:438097.0 118:42515.0 119:56337…						2004	2705	1857	6544	2295	1124	7353	4108	4401	5729	777	5969	2340	887	3163
161365	520732	204	161365	85:466.0 86:548.0 87:439.0 88:194.0 89:677.0 90:79.0 97:508.0 99:471.0 101:5743.0 102:619.0 103:4749.0 104:560.0 105:570.0 111:161.0 112:178.0 113:320.0 115:783.0 116:2583.0 117:2300.0 118:292.0 119:758.0 120:41.0 127:505.0 128:136.0 129:4803.0 130:583.0 131:2818.0 132:329.0 133:5948.0 134:704.0 135:583.0 141:249.0 142:374.0 143:1681.0 144:238.0 145:203.0 146:71.0 147:16524.0 148:2028.0 149:2318.…						1116	1178	749	1313	1736	2404	2057	2726	2822	3081	3588	3433	1618	2232	2885
160962	1052547	85	160962	85:5859.0 86:382.0 95:138.0 96:279.0 97:1595.0 98:376.0 99:2073.0 100:186.0 107:41.0 110:175.0 111:736.0 112:302.0 113:1303.0 114:61.0 122:26.0 124:122.0 125:392.0 126:188.0 127:705.0 128:91.0 138:29.0 139:160.0 140:153.0 141:517.0 142:58.0 154:79.0 155:404.0 168:47.0 169:301.0 170:30.0 182:61.0 183:140.0 184:45.0 193:50.0 197:105.0 198:31.0 210:45.0 211:88.0 225:64.0 227:13.0 239:40.0 241:22.0 2…						27182	55163	22781	39027	9385	12931	4236	6274	37050	21158	3119	9602	16778	15623	16749
146868	1049260	305	146868	85:306.0 86:60.0 89:159.0 91:54.0 95:122.0 97:117.0 99:285.0 101:584.0 102:187.0 103:4031.0 104:391.0 105:210.0 109:126.0 111:209.0 112:40.0 113:269.0 115:137.0 116:436.0 117:809.0 118:64.0 119:246.0 123:58.0 125:103.0 127:209.0 128:49.0 129:4633.0 130:547.0 131:922.0 132:167.0 133:2357.0 134:326.0 135:224.0 136:37.0 137:14.0 139:77.0 141:194.0 142:168.0 143:2554.0 144:300.0 145:337.0 146:73.0 14…						885	1074	1067	1275	1249	966	806	1243	995	1138	801	1897	916	226	992
146580	1078050	249	146580	86:174.0 88:749.0 89:1109.0 90:209.0 91:296.0 92:84.0 99:467.0 101:872.0 102:2072.0 103:1187.0 104:367.0 108:177.0 112:375.0 113:355.0 115:720.0 117:2903.0 118:394.0 119:599.0 125:212.0 126:116.0 130:665.0 131:1844.0 132:61.0 133:2348.0 134:290.0 137:81.0 139:63.0 141:288.0 142:88.0 143:6056.0 144:880.0 145:3795.0 146:830.0 147:15278.0 148:2518.0 149:1701.0 150:275.0 152:64.0 159:206.0 160:184.0 …						34954	28413	23422	27960	14771	22404	9458	22571	15305	14115	6663	14999	18248	15220	13840
146289	855690	462	146289	85:1646.0 86:2098.0 87:1214.0 88:1228.0 89:23685.0 90:1653.0 91:1971.0 92:672.0 94:579.0 95:1472.0 97:121.0 98:278.0 100:10891.0 101:5733.0 102:595.0 103:28022.0 104:3270.0 105:1246.0 107:500.0 109:680.0 111:1620.0 112:813.0 113:2565.0 114:8666.0 115:1851.0 117:5817.0 119:1732.0 120:889.0 125:315.0 126:463.0 128:712.0 129:11523.0 131:10443.0 132:2141.0 133:14646.0 134:2834.0 137:446.0 138:531.0 1…						1172	1304	901	1227	1167	1276	969	962	1180	698	1430	1708	1151	1023	1221
136146	654455	327	136146	85:821.0 86:190.0 88:506.0 89:13588.0 90:1694.0 91:4775.0 92:913.0 93:4951.0 94:1036.0 95:2618.0 96:6702.0 97:1810.0 98:4416.0 99:2609.0 103:2061.0 104:3866.0 105:4709.0 106:2340.0 107:2439.0 108:1074.0 109:4539.0 110:897.0 111:2011.0 112:1431.0 113:2299.0 114:85.0 116:108.0 119:5287.0 120:1132.0 121:2731.0 122:2413.0 123:1933.0 124:1185.0 125:644.0 126:968.0 127:1440.0 128:98.0 133:7066.0 134:37…						3842	4639	2791	10375	1646	4364	4131	3695	9852	676	1279	11189	461	3573	3248
136141	533292	103	136141	85:1018.0 86:1291.0 87:1756.0 88:979.0 89:12509.0 90:926.0 91:546.0 94:256.0 95:148.0 97:213.0 98:248.0 99:963.0 100:1880.0 101:2571.0 102:981.0 103:101327.0 104:9313.0 105:8536.0 106:634.0 111:237.0 112:456.0 113:1366.0 114:1163.0 115:1440.0 116:502.0 117:2943.0 118:303.0 119:1407.0 120:204.0 121:30.0 126:385.0 127:294.0 128:744.0 129:14186.0 130:2949.0 131:5491.0 132:852.0 133:12350.0 134:1490.…						51060	97107	79574	78052	67749	75534	43991	81386	99595	102869	37660	111379	58792	64687	67963
135871	705865	324	135871	85:203.0 87:66.0 88:89.0 89:4293.0 90:617.0 91:2808.0 92:103.0 93:212.0 94:88.0 95:199.0 99:40.0 102:52.0 103:282.0 105:892.0 106:171.0 107:888.0 110:103.0 115:202.0 116:87.0 117:252.0 119:610.0 122:72.0 123:108.0 130:124.0 131:264.0 133:365.0 134:701.0 135:525.0 136:13.0 137:768.0 139:86.0 147:676.0 149:221.0 151:159.0 154:46.0 161:188.0 163:16.0 165:1318.0 176:300.0 178:114.0 179:587.0 181:127.…						8361	5190	9730	3111	1841	6941	4871	8139	4860	658	3249	5477	3758	3171	3340
135867	575238	165	135867	85:339.0 87:89.0 89:761.0 90:157.0 91:457.0 95:199.0 96:103.0 97:123.0 99:115.0 103:332.0 104:81.0 105:842.0 106:122.0 107:428.0 109:522.0 110:66.0 112:52.0 113:68.0 116:44.0 117:116.0 118:68.0 119:205.0 120:67.0 121:204.0 123:209.0 124:61.0 129:86.0 132:93.0 133:297.0 135:551.0 136:130.0 137:2531.0 138:360.0 139:127.0 140:39.0 141:34.0 146:49.0 147:1045.0 148:159.0 149:320.0 150:258.0 151:240.0 …						49302	25321	55738	19085	11881	38504	26083	60277	35911	65281	22238	49173	9694	18753	17993
135773	859352	259	135773	85:126.0 86:44.0 87:134.0 88:137.0 89:286.0 90:27.0 91:160.0 93:67.0 97:169.0 101:243.0 102:90.0 103:1968.0 104:358.0 105:45.0 107:41.0 108:42.0 110:62.0 111:174.0 112:40.0 113:122.0 114:59.0 115:408.0 116:185.0 117:659.0 118:86.0 119:86.0 123:37.0 127:167.0 128:46.0 129:1412.0 130:305.0 131:329.0 133:519.0 134:107.0 136:33.0 138:16.0 139:74.0 140:34.0 141:166.0 142:107.0 143:353.0 144:39.0 145:1…						1310	2024	1051	1806	334	1154	1079	1397	1225	1396	1084	1507	3217	3903	4124
135230	953499	369	135230	85:223.0 86:287.0 89:2514.0 90:187.0 91:449.0 92:97.0 95:316.0 97:1273.0 99:262.0 100:486.0 101:1315.0 102:638.0 103:5197.0 105:1401.0 106:178.0 110:118.0 112:176.0 114:402.0 115:1194.0 116:184.0 117:4624.0 118:67.0 119:664.0 120:108.0 121:163.0 122:76.0 123:203.0 124:116.0 126:117.0 127:503.0 129:5177.0 130:782.0 131:3256.0 132:312.0 133:3646.0 134:717.0 136:191.0 139:212.0 141:294.0 142:516.0 1…						2256	10065	12139	15971	12985	13996	6623	12591	13427	12679	6433	14853	11785	3835	10023
135193	1085857	204	135193	87:98.0 89:1066.0 90:155.0 91:281.0 95:145.0 99:293.0 100:135.0 101:543.0 102:167.0 103:3058.0 107:296.0 108:98.0 116:258.0 118:190.0 119:122.0 120:95.0 128:19.0 129:2320.0 131:894.0 133:900.0 134:70.0 136:96.0 138:41.0 140:44.0 141:183.0 142:83.0 146:131.0 147:3738.0 149:533.0 155:187.0 156:121.0 157:432.0 159:94.0 160:97.0 161:186.0 162:52.0 164:409.0 165:120.0 166:65.0 169:327.0 170:95.0 171:1…						16504	6654	16731	13066	16697	15585	7617	10811	11225	10736	4189	11226	14257	11850	13387
135163	1012897	411	135163	85:1415.0 86:160.0 87:154.0 89:90.0 90:137.0 91:1462.0 92:141.0 93:163.0 95:1042.0 96:214.0 97:2586.0 98:209.0 99:542.0 101:495.0 102:158.0 103:3403.0 104:285.0 105:186.0 109:453.0 110:96.0 111:1107.0 112:138.0 113:223.0 115:401.0 116:144.0 117:228.0 118:56.0 120:36.0 123:161.0 125:400.0 129:2775.0 130:379.0 131:263.0 133:1166.0 134:118.0 137:56.0 139:158.0 141:107.0 143:442.0 145:81.0 146:68.0 1…						27046	26168	20510	30767	21867	29826	12260	17429	20069	16445	6227	19206	41985	35844	28086
135103	917686	179	135103	85:348.0 87:191.0 89:1083.0 90:538.0 91:694.0 92:23.0 95:239.0 97:239.0 99:118.0 103:7675.0 104:711.0 105:751.0 106:89.0 107:273.0 109:72.0 111:59.0 113:163.0 114:70.0 115:397.0 117:1445.0 119:543.0 121:85.0 122:74.0 123:27.0 124:28.0 125:71.0 127:289.0 129:1375.0 131:797.0 133:1291.0 134:230.0 135:504.0 138:43.0 139:65.0 141:61.0 143:293.0 144:25.0 145:677.0 147:4220.0 148:1431.0 149:1573.0 150:…						50187	25094	44644	55688	47942	68615	40863	43470	59528	51123	29834	68669	54402	50014	48814
134887	938551	370	134887	85:649.0 86:171.0 87:1002.0 88:418.0 89:2529.0 90:314.0 91:753.0 92:78.0 95:118.0 97:206.0 99:1049.0 100:105.0 101:2420.0 103:24263.0 104:2997.0 105:1219.0 106:56.0 107:223.0 109:1109.0 110:91.0 111:619.0 112:41.0 113:785.0 114:226.0 115:1414.0 116:799.0 117:6693.0 118:719.0 119:1152.0 120:92.0 121:74.0 123:82.0 125:130.0 127:531.0 128:162.0 129:16034.0 130:1923.0 131:4475.0 132:707.0 133:5676.0 …						2735	2842	2981	2054	3204	2629	1926	1175	2711	2424	1320	2690	2753	1758	2069
134866	889450	179	134866	89:206.0 90:67.0 91:349.0 97:192.0 101:202.0 103:2805.0 104:358.0 105:588.0 106:135.0 107:64.0 108:45.0 116:214.0 117:574.0 118:48.0 119:129.0 123:46.0 125:68.0 129:766.0 130:66.0 131:311.0 133:591.0 134:104.0 135:783.0 136:58.0 137:116.0 141:68.0 145:136.0 147:2431.0 148:310.0 149:1128.0 150:157.0 151:408.0 152:73.0 154:30.0 158:35.0 161:348.0 162:50.0 163:2594.0 164:494.0 165:358.0 168:37.0 169…						2297	1486	2155	3893	1076	1916	1224	2296	4101	4836	1095	5088	2307	1941	2051
134665	966226	369	134665	89:621.0 96:67.0 100:104.0 103:1071.0 104:71.0 105:578.0 108:21.0 117:1470.0 118:167.0 119:154.0 130:160.0 131:293.0 133:782.0 135:173.0 140:23.0 143:202.0 147:2397.0 149:366.0 150:18.0 152:39.0 160:1096.0 161:90.0 162:58.0 173:25.0 174:40.0 178:25.0 179:517.0 180:108.0 186:86.0 191:200.0 196:47.0 202:42.0 203:36.0 205:715.0 214:29.0 219:131.0 220:10.0 227:32.0 228:50.0 230:48.0 233:57.0 238:8.0 …						9697	11024	8922	12485	10595	12028	5117	9310	10835	9542	5321	12900	10962	8648	10199
134661	928100	242	134661	85:301.0 88:91.0 89:1354.0 90:130.0 91:232.0 92:79.0 93:204.0 95:126.0 96:73.0 99:334.0 100:70.0 101:424.0 102:69.0 103:3681.0 104:322.0 105:302.0 107:217.0 109:414.0 111:236.0 112:75.0 113:351.0 114:81.0 115:219.0 116:145.0 117:1301.0 118:164.0 119:255.0 121:88.0 122:25.0 123:102.0 125:65.0 129:3849.0 130:370.0 131:879.0 132:113.0 133:1327.0 134:195.0 135:379.0 137:142.0 138:53.0 139:157.0 140:3…						15273	12866	10707	45415	7486	14989	19554	12289	29072	27183	25632	34492	20034	19891	19347
133209	283735	151	133209	86:67.0 87:299.0 88:2076.0 89:370.0 90:25.0 92:133.0 99:96.0 100:63.0 102:258.0 103:786.0 105:338.0 106:134.0 107:610.0 110:8740.0 111:588.0 117:1717.0 118:339.0 121:944.0 122:63.0 127:245.0 131:705.0 133:651.0 135:3115.0 136:583.0 137:1307.0 138:676.0 141:72.0 146:49.0 147:2159.0 148:272.0 149:316.0 150:203.0 151:27343.0 152:4337.0 153:2178.0 155:574.0 158:59.0 159:89.0 162:1699.0 163:217.0 169:…						4388	3486	5293	4472	4316	4415	3221	5715	3436	3611	2473	6043	4779	2653	2843
133018	793280	217	133018	86:50.0 87:130.0 97:59.0 98:97.0 99:88.0 101:357.0 102:141.0 105:73.0 111:86.0 113:49.0 115:210.0 116:178.0 117:458.0 118:54.0 119:56.0 121:36.0 124:41.0 125:25.0 128:110.0 129:916.0 131:174.0 133:766.0 139:44.0 140:94.0 142:49.0 143:309.0 147:800.0 148:184.0 149:132.0 152:44.0 153:44.0 156:20.0 157:29.0 159:52.0 161:68.0 166:43.0 169:37.0 170:37.0 175:50.0 176:33.0 178:56.0 179:30.0 181:36.0 183…						9976	8007	15364	10361	18029	11653	6699	18177	8162	6302	2469	8002	4990	1953	4562
133001	875608	361	133001	85:1225.0 86:251.0 87:1129.0 88:623.0 89:2893.0 90:445.0 91:352.0 92:90.0 93:81.0 95:306.0 97:996.0 98:144.0 99:1173.0 100:149.0 101:4135.0 102:1341.0 103:36742.0 104:3956.0 105:1969.0 106:136.0 109:2195.0 110:93.0 111:1105.0 112:164.0 113:1224.0 114:206.0 115:1381.0 116:2445.0 117:10909.0 118:1126.0 119:1264.0 120:193.0 121:101.0 123:58.0 124:67.0 125:275.0 127:1233.0 128:289.0 129:28125.0 130:3…						1129	1235	1434	1402	571	1493	760	1428	1813	1344	686	1893	1308	1575	1222
131202	957189	195	131202	85:302.0 86:82.0 87:159.0 89:529.0 90:97.0 91:61.0 92:538.0 93:130.0 95:147.0 96:104.0 99:261.0 101:482.0 102:88.0 103:3090.0 104:407.0 105:260.0 106:57.0 109:292.0 110:47.0 111:181.0 113:207.0 115:213.0 116:249.0 117:947.0 118:137.0 119:211.0 120:173.0 121:1011.0 122:409.0 123:43.0 124:7.0 129:2660.0 130:284.0 131:910.0 133:1206.0 134:178.0 135:65.0 136:71.0 137:64.0 138:18.0 139:145.0 141:37.0 …						26145	34496	37344	49144	30708	42319	27027	31450	47733	49466	18803	50596	31150	25335	25016
131151	617441	123	131151	85:326.0 87:1264.0 88:421.0 89:1587.0 90:290.0 91:349.0 92:446.0 93:441.0 94:1025.0 95:1700.0 96:541.0 97:902.0 98:428.0 99:2232.0 100:576.0 101:1483.0 102:492.0 103:1910.0 104:90.0 105:698.0 106:196.0 107:363.0 108:191.0 109:605.0 111:1119.0 112:133.0 113:348.0 114:80.0 115:2081.0 116:1655.0 117:2051.0 118:488.0 119:1127.0 121:207.0 122:90.0 123:10331.0 124:851.0 125:889.0 129:1911.0 130:699.0 1…						2852	2651	1289	2429	3852	2372	2286	4521	1790	1503	916	2175	2510	2203	2106
130533	535448	232	130533	98:79.0 100:3054.0 101:212.0 102:103.0 117:404.0 118:121.0 127:64.0 129:70.0 130:118.0 133:121.0 142:39.0 143:26.0 144:131.0 147:527.0 148:33.0 163:52.0 176:36.0 189:52.0 201:60.0 207:20.0 217:190.0 221:121.0 232:3222.0 233:603.0 234:235.0 235:17.0 244:40.0 281:9.0 327:17.0 333:21.0						827	1420	1147	447	987	755	3101	916	589	733	2249	748	510	520	446
127629	975202	169	127629	85:2803.0 86:1129.0 87:1996.0 88:625.0 89:8123.0 90:1653.0 91:3342.0 92:2109.0 93:1874.0 94:330.0 95:868.0 96:676.0 97:1452.0 98:895.0 99:3636.0 100:608.0 101:7675.0 102:991.0 103:41935.0 104:6269.0 105:3996.0 106:204.0 107:1703.0 108:1015.0 109:2973.0 110:352.0 111:2683.0 112:229.0 113:2465.0 114:571.0 115:3543.0 116:3863.0 117:14776.0 118:1574.0 119:4943.0 120:1981.0 121:2987.0 122:3215.0 123:1…						36816	39998	20140	101776	100473	25853	14188	13195	45280	4710	36938	28757	26481	62550	4018
127388	898945	217	127388	85:2207.0 86:132.0 87:70.0 89:87.0 90:44.0 93:40.0 97:52.0 98:29.0 99:115.0 101:796.0 102:127.0 103:624.0 104:77.0 111:38.0 115:202.0 116:299.0 117:486.0 118:30.0 119:73.0 121:32.0 122:29.0 123:21.0 125:27.0 129:2286.0 130:361.0 131:743.0 132:144.0 133:606.0 134:102.0 135:80.0 136:30.0 138:30.0 139:20.0 142:64.0 143:731.0 144:70.0 145:87.0 146:62.0 147:2909.0 148:292.0 149:373.0 150:40.0 151:38.0…						2300	4815	4163	13510	3960	4100	1977	43629	938	7354	2738	3180	2264	2907	3487
127358	906942	191	127358	86:82.0 87:111.0 88:28.0 89:736.0 90:87.0 95:12.0 97:209.0 98:53.0 99:52.0 100:163.0 101:588.0 102:176.0 103:4788.0 104:357.0 105:419.0 106:44.0 110:30.0 111:63.0 112:23.0 113:89.0 114:92.0 115:135.0 116:177.0 117:776.0 118:78.0 119:110.0 124:19.0 125:35.0 127:126.0 128:57.0 129:1386.0 130:139.0 131:363.0 132:47.0 133:797.0 134:95.0 135:40.0 136:23.0 138:18.0 141:53.0 142:78.0 143:229.0 144:48.0 …						7988	7572	7411	8400	5583	5283	4869	6844	7875	11516	3531	9882	5040	5285	7436
127344	1055779	204	127344	85:110.0 86:32.0 87:52.0 89:205.0 90:33.0 91:100.0 92:29.0 96:144.0 97:69.0 99:74.0 101:603.0 102:103.0 103:3389.0 104:200.0 105:135.0 109:31.0 113:52.0 115:221.0 116:289.0 117:726.0 118:93.0 119:60.0 127:102.0 129:2739.0 130:296.0 131:899.0 132:103.0 133:496.0 141:34.0 142:26.0 143:563.0 144:57.0 145:131.0 147:2279.0 148:336.0 149:369.0 155:146.0 156:21.0 157:199.0 159:40.0 161:76.0 163:76.0 168…						14901	10730	14729	10390	14534	10561	8476	26168	9782	6955	5843	8210	10893	8955	8824
126585	895897	259	126585	85:127.0 88:74.0 89:1730.0 90:112.0 95:148.0 99:335.0 103:5438.0 104:684.0 105:931.0 107:44.0 110:79.0 111:322.0 112:159.0 114:119.0 115:1573.0 116:756.0 117:1270.0 118:271.0 119:144.0 120:47.0 122:29.0 123:55.0 125:43.0 128:104.0 129:2450.0 130:287.0 131:473.0 132:46.0 133:1025.0 134:295.0 138:44.0 141:345.0 143:783.0 145:288.0 147:4748.0 148:337.0 149:625.0 150:30.0 151:58.0 152:47.0 153:125.0 …						5232	8043	7495	7566	4041	7691	3379	8306	3577	7795	2313	7650	6323	6264	6239
125960	938149	217	125960	85:70.0 89:692.0 100:126.0 101:190.0 102:40.0 103:2714.0 104:190.0 105:108.0 114:392.0 115:61.0 116:63.0 117:431.0 129:1157.0 130:186.0 131:254.0 133:822.0 134:54.0 141:38.0 142:72.0 143:151.0 144:35.0 145:55.0 147:2822.0 148:261.0 149:275.0 154:16.0 157:169.0 158:25.0 159:30.0 163:60.0 169:544.0 170:16.0 171:49.0 172:115.0 173:38.0 174:21.0 179:20.0 183:21.0 189:95.0 191:228.0 193:23.0 203:34.0 …						8605	13534	8618	10695	13870	8843	20177	17397	11508	15555	7653	14624	11213	11962	10898
125898	1138330	361	125898	85:701.0 86:75.0 87:296.0 88:295.0 89:670.0 90:40.0 91:66.0 93:26.0 95:122.0 97:375.0 98:29.0 99:440.0 100:66.0 101:2402.0 102:515.0 103:17178.0 104:1420.0 105:668.0 106:56.0 108:26.0 109:1105.0 111:355.0 113:626.0 115:743.0 116:942.0 117:4571.0 118:368.0 119:354.0 121:72.0 124:27.0 125:108.0 127:273.0 128:120.0 129:17235.0 130:1804.0 131:2423.0 132:274.0 133:3796.0 134:398.0 135:398.0 137:44.0 1…						4574	4542	4229	3879	1818	2009	2278	3838	3315	2800	1646	3042	3560	2754	2878
125897	933563	217	125897	85:2918.0 86:533.0 87:2444.0 88:1950.0 89:24231.0 90:2082.0 91:531.0 94:528.0 95:95.0 96:265.0 97:794.0 98:9.0 99:2686.0 100:3754.0 101:10246.0 102:4056.0 103:152366.0 104:14542.0 105:9294.0 106:530.0 107:237.0 108:205.0 109:2192.0 110:549.0 111:1598.0 112:280.0 113:4712.0 114:7235.0 115:3710.0 116:5264.0 117:28753.0 118:3146.0 119:3616.0 120:68.0 123:40.0 124:423.0 125:350.0 126:967.0 127:2030.0…						5268	30745	17504	15487	6421	28842	17118	29140	25273	11735	17216	27968	29013	27894	27726
125870	997617	236	125870	85:1426.0 86:151.0 87:166.0 89:1003.0 91:591.0 92:95.0 93:962.0 94:901.0 95:668.0 96:300.0 98:132.0 99:117.0 101:759.0 102:72.0 103:6206.0 104:534.0 106:323.0 107:714.0 108:380.0 109:147.0 110:125.0 112:63.0 113:56.0 114:74.0 116:212.0 117:1885.0 118:277.0 119:611.0 120:1401.0 121:487.0 122:511.0 123:294.0 124:181.0 125:8.0 126:97.0 129:4048.0 130:425.0 131:833.0 132:468.0 133:1328.0 134:1434.0 1…						1339	1657	1541	1024	1156	1887	795	1332	722	1329	642	732	1247	914	909
125868	1006176	204	125868	89:1611.0 91:4950.0 92:156.0 93:1745.0 94:297.0 95:19170.0 96:463.0 99:3051.0 100:457.0 101:2231.0 103:16452.0 104:1225.0 105:1080.0 106:120.0 107:818.0 109:7956.0 110:941.0 113:283.0 115:1762.0 116:2788.0 117:25633.0 118:2562.0 119:1905.0 120:134.0 121:458.0 123:1601.0 128:142.0 129:13924.0 130:1166.0 131:3649.0 132:902.0 133:4251.0 134:562.0 135:140.0 138:149.0 139:231.0 142:449.0 144:622.0 145…						49697	16496	51267	51100	37846	36201	22524	52278	32422	36245	11824	10006	36721	28235	27609
125830	765128	217	125830	85:152.0 86:36.0 87:84.0 88:94.0 89:1148.0 90:122.0 93:43.0 97:129.0 98:220.0 99:233.0 100:56.0 101:565.0 102:159.0 103:1588.0 104:171.0 105:141.0 110:47.0 111:148.0 112:58.0 113:52.0 114:73.0 115:73.0 116:119.0 117:892.0 118:85.0 119:128.0 120:69.0 122:36.0 125:42.0 126:261.0 127:140.0 128:116.0 129:849.0 130:143.0 131:493.0 132:48.0 133:2117.0 134:216.0 135:85.0 138:34.0 139:18.0 140:116.0 141:…						3857	3001	6304	3118	6217	4450	2069	7345	3564	1994	1822	4234	1071	1435	1285
125829	942899	282	125829	85:203.0 88:221.0 89:1618.0 91:882.0 93:248.0 95:332.0 98:150.0 103:6438.0 104:900.0 106:207.0 108:218.0 109:163.0 112:87.0 113:296.0 116:281.0 120:448.0 121:575.0 122:193.0 123:52.0 126:154.0 127:551.0 129:4198.0 130:446.0 131:597.0 133:1850.0 134:165.0 136:61.0 137:83.0 138:183.0 141:377.0 142:124.0 147:5685.0 148:525.0 149:1329.0 151:564.0 152:120.0 153:428.0 155:613.0 157:1624.0 158:220.0 159…						2284	2494	2100	2740	1600	2318	1403	3149	2854	2486	1270	2470	1733	1691	1618
125802	891034	204	125802	85:128.0 86:55.0 87:241.0 88:172.0 89:1092.0 90:81.0 91:84.0 94:58.0 99:68.0 101:1298.0 102:235.0 103:10107.0 104:763.0 105:383.0 111:90.0 113:255.0 114:101.0 115:413.0 116:605.0 117:4206.0 118:405.0 119:364.0 120:62.0 121:61.0 126:54.0 127:256.0 128:61.0 129:11444.0 130:1321.0 131:1687.0 132:167.0 133:2588.0 134:303.0 135:151.0 137:29.0 139:75.0 140:44.0 141:160.0 142:89.0 143:1116.0 144:58.0 14…						1218	803	1502	1355	940	1489	817	2037	670	1130	1419	1983	28078	33034	33651
125786	950589	204	125786	85:621.0 86:100.0 88:758.0 89:5147.0 90:394.0 91:2601.0 92:345.0 95:555.0 99:829.0 100:181.0 101:4419.0 102:843.0 103:14234.0 104:1654.0 105:939.0 107:188.0 109:398.0 111:489.0 112:26.0 113:775.0 114:100.0 115:1183.0 116:2672.0 117:9949.0 118:991.0 119:1371.0 120:334.0 121:990.0 122:173.0 123:121.0 125:134.0 128:56.0 129:10900.0 130:1011.0 131:3775.0 132:495.0 133:6878.0 134:810.0 135:2148.0 136:…						132063	159138	184424	182084	155758	120210	73170	26852	174311	112645	67453	138419	122644	10445	42791
125070	847682	204	125070	86:56.0 89:121.0 91:62.0 94:27.0 95:102.0 96:42.0 97:49.0 99:51.0 101:158.0 103:1603.0 104:188.0 109:53.0 111:102.0 116:98.0 117:296.0 123:35.0 129:579.0 130:108.0 131:226.0 133:352.0 137:25.0 139:342.0 140:31.0 143:148.0 144:24.0 147:1362.0 148:129.0 149:154.0 155:25.0 157:290.0 158:53.0 169:99.0 170:70.0 171:268.0 173:108.0 176:23.0 177:44.0 178:32.0 189:172.0 190:43.0 191:207.0 204:3437.0 205:…						2670	4845	3046	4583	3322	3747	2550	4850	4918	3300	1317	3987	4448	4926	4910
124996	505556	166	124996	98:24.0 105:35.0 110:69.0 117:122.0 119:16.0 126:27.0 133:136.0 134:66.0 140:2595.0 141:97.0 147:67.0 165:60.0 166:2605.0 167:69.0 176:20.0 184:342.0 200:80.0 209:1286.0 210:37.0 223:202.0 268:72.0 313:178.0						2089	1587	1542	1302	1250	2179	1151	1472	1879	1084	809	1184	1185	1132	1156
124615	407752	101	124615	85:512.0 86:257.0 87:2254.0 88:312.0 89:518.0 95:47.0 97:112.0 99:576.0 100:192.0 101:6380.0 102:2553.0 103:3777.0 104:396.0 105:200.0 110:248.0 111:98.0 113:391.0 115:472.0 116:2892.0 117:806.0 118:158.0 120:43.0 129:1007.0 130:1010.0 131:2723.0 132:683.0 133:1516.0 134:305.0 135:156.0 143:119.0 144:61.0 146:21.0 147:19696.0 148:3122.0 149:1255.0 150:37.0 157:218.0 159:34.0 163:60.0 172:40.0 175…						6125	9043	7887	1229	5497	7703	4415	3786	7449	5431	3398	8155	5604	2829	5587
124602	1096375	204	124602	85:135.0 88:80.0 89:389.0 91:879.0 92:185.0 93:71.0 96:120.0 97:512.0 99:286.0 100:70.0 101:2197.0 102:395.0 103:4540.0 104:1018.0 105:18559.0 106:1444.0 108:64.0 109:83.0 110:19.0 111:164.0 113:284.0 115:680.0 116:1088.0 117:2168.0 118:247.0 119:244.0 120:58.0 121:36.0 122:25.0 123:26.0 125:72.0 126:28.0 127:282.0 128:72.0 129:6708.0 130:696.0 131:1046.0 132:193.0 133:1825.0 134:143.0 135:106.0 …						11282	10602	9982	12373	8627	9357	5056	6710	8599	7743	2982	7933	10164	7316	7090
124334	947858	242	124334	85:240.0 86:24.0 88:46.0 89:1240.0 90:210.0 91:296.0 92:110.0 93:175.0 94:18.0 96:139.0 98:50.0 99:405.0 101:604.0 102:21.0 103:3020.0 104:253.0 105:288.0 106:193.0 109:276.0 111:211.0 112:50.0 113:145.0 115:30.0 117:1129.0 118:81.0 119:135.0 120:66.0 121:51.0 122:29.0 123:121.0 124:8.0 125:44.0 126:127.0 127:132.0 129:2817.0 130:334.0 131:764.0 133:1065.0 134:102.0 135:295.0 136:38.0 137:159.0 1…						3269	1971	2817	9019	1441	2339	5391	3639	5125	9035	3630	10275	3492	2994	3439
124044	514809	271	124044	85:437.0 93:66.0 95:119.0 97:123.0 99:364.0 107:143.0 108:70.0 109:41.0 111:391.0 112:85.0 119:56.0 121:73.0 123:61.0 125:69.0 128:380.0 131:137.0 133:118.0 136:32.0 139:26.0 140:46.0 141:30.0 143:182.0 144:24.0 145:62.0 147:371.0 148:58.0 149:85.0 153:557.0 154:140.0 155:45.0 157:61.0 167:31.0 168:9.0 169:300.0 170:42.0 173:45.0 181:90.0 182:65.0 183:84.0 197:149.0 198:40.0 207:72.0 215:43.0 227…						988	1188	1223	865	950	1030	486	987	786	544	406	862	914	658	705
123970	851703	273	123970	85:248.0 86:48.0 87:236.0 88:60.0 89:820.0 90:58.0 91:88.0 95:74.0 97:116.0 99:538.0 100:76.0 101:3410.0 102:355.0 103:1839.0 104:68.0 105:169.0 107:41.0 109:53.0 111:205.0 112:45.0 113:132.0 115:989.0 116:2644.0 117:5067.0 118:534.0 119:388.0 122:28.0 123:20.0 127:67.0 128:95.0 129:1997.0 130:253.0 131:1114.0 132:158.0 133:1804.0 134:262.0 135:163.0 137:21.0 139:56.0 141:208.0 142:97.0 143:745.0…						925	1126	704	1194	611	981	392	872	741	1090	390	913	728	748	814
122848	1016903	179	122848	86:81.0 90:55.0 92:70.0 94:37.0 105:123.0 116:86.0 120:57.0 128:68.0 129:88.0 131:202.0 134:111.0 145:65.0 147:527.0 149:238.0 161:56.0 164:47.0 165:32.0 169:37.0 174:100.0 176:80.0 177:172.0 178:113.0 179:7236.0 180:1173.0 181:274.0 182:62.0 187:40.0 189:87.0 190:41.0 192:59.0 194:77.0 195:58.0 196:24.0 198:19.0 201:63.0 203:53.0 208:68.0 210:44.0 212:46.0 220:40.0 223:35.0 231:42.0 232:37.0 233…						9093	7549	9209	11539	6270	7278	3447	7211	8177	8619	3024	8698	8403	6108	6277
119023	873486	103	119023	85:1196.0 86:984.0 87:1252.0 88:897.0 89:11086.0 90:889.0 91:655.0 94:448.0 95:879.0 96:13146.0 97:3627.0 98:6149.0 99:1476.0 100:1406.0 101:3508.0 102:1399.0 103:54929.0 104:5536.0 105:2860.0 106:592.0 107:1813.0 108:507.0 109:259.0 110:240.0 111:499.0 112:780.0 113:1463.0 114:1084.0 115:955.0 116:1138.0 117:11584.0 118:1226.0 119:1397.0 120:276.0 121:171.0 122:266.0 123:2227.0 124:287.0 125:248…						9407	16048	14958	14547	11543	16650	10120	15204	18596	14667	6840	19502	15266	12086	11865
118997	654635	209	118997	85:187.0 88:515.0 89:3062.0 90:376.0 91:1828.0 92:272.0 93:398.0 94:190.0 95:326.0 96:431.0 98:108.0 99:355.0 101:430.0 102:119.0 104:540.0 105:1412.0 106:311.0 107:353.0 108:122.0 109:213.0 111:71.0 112:102.0 115:526.0 116:1971.0 117:558.0 118:264.0 119:339.0 121:422.0 122:152.0 123:187.0 124:110.0 125:35.0 126:67.0 128:73.0 132:93.0 133:583.0 134:155.0 135:1234.0 136:736.0 137:672.0 138:187.0 1…						1457	6731	5574	7653	5320	6101	4447	5226	7192	1807	3129	8812	3132	3614	3423
117034	923480	284	117034	85:194.0 86:85.0 87:286.0 88:120.0 89:1748.0 90:200.0 91:397.0 92:86.0 93:110.0 94:41.0 95:173.0 97:207.0 98:66.0 99:392.0 101:822.0 102:148.0 103:4853.0 104:498.0 105:408.0 107:86.0 108:54.0 109:325.0 110:60.0 111:243.0 112:153.0 113:295.0 114:66.0 115:246.0 116:268.0 117:1821.0 118:143.0 119:284.0 120:96.0 121:184.0 122:41.0 123:88.0 124:21.0 125:67.0 126:88.0 127:179.0 128:54.0 129:4437.0 130:…						5265	5676	5729	10653	5189	6665	2439	5218	8576	9771	5619	12021	6976	6608	6113
110889	423283	140	110889	86:56.0 87:520.0 90:4760.0 91:556.0 93:109.0 95:101.0 96:141.0 97:2680.0 101:5.0 103:504.0 104:56.0 106:74.0 107:91.0 108:285.0 110:6264.0 111:233.0 112:2455.0 114:101.0 115:558.0 116:121.0 117:169.0 119:102.0 123:24.0 128:559.0 129:133.0 134:281.0 135:168.0 136:46.0 140:37991.0 141:8440.0 142:1809.0 144:112.0 146:24.0 156:48.0 164:18.0 165:24.0 171:460.0 172:549.0 174:23.0 178:30.0 184:242.0 186…						7587	6739	9176	6104	4559	7296	12803	7272	8210	8594	8603	6698	5095	5199	5176
110635	694885	244	110635	85:2217.0 86:1233.0 87:1380.0 88:884.0 89:11845.0 90:1017.0 91:562.0 92:106.0 94:363.0 95:216.0 96:572.0 97:489.0 98:837.0 99:1593.0 100:2627.0 101:4295.0 103:14792.0 104:1517.0 105:1931.0 106:646.0 107:185.0 110:1022.0 111:1014.0 112:2661.0 113:885.0 114:535.0 115:1912.0 116:1128.0 117:14944.0 118:1456.0 119:1830.0 120:198.0 122:50.0 124:324.0 126:1838.0 127:1252.0 128:1472.0 129:4739.0 130:894.…						902	1445	958	1662	1421	886	722	1070	734	832	366	786	1013	982	1049
110393	727540	173	110393	87:195.0 88:133.0 89:550.0 90:120.0 94:51.0 96:94.0 97:101.0 98:137.0 99:147.0 100:467.0 101:211.0 102:148.0 103:1335.0 104:166.0 105:128.0 106:39.0 108:114.0 109:77.0 110:53.0 111:120.0 112:94.0 113:169.0 114:116.0 115:310.0 116:1257.0 117:1044.0 118:198.0 119:119.0 120:52.0 122:183.0 124:66.0 125:35.0 128:255.0 130:293.0 131:2715.0 132:526.0 133:675.0 134:114.0 135:133.0 136:99.0 137:33.0 140:2…						2485	2853	1557	7178	10859	7531	8205	8497	7987	8148	4788	10080	6191	5585	6044
110368	685643	292	110368	87:138.0 88:79.0 89:388.0 90:258.0 92:82.0 94:41.0 99:52.0 101:242.0 102:113.0 104:68.0 105:351.0 106:111.0 107:152.0 115:421.0 116:327.0 118:107.0 119:56.0 121:175.0 122:12.0 130:359.0 131:642.0 133:831.0 134:217.0 135:66.0 138:22.0 142:346.0 143:63.0 144:177.0 145:131.0 146:178.0 147:8705.0 148:1391.0 149:1359.0 154:121.0 155:67.0 160:87.0 162:131.0 163:81.0 169:19.0 172:299.0 174:288.0 175:134…						3751	617	4218	3307	656	2467	3273	7323	2053	2577	2163	3124	2990	2313	3126
109386	542775	204	109386	85:154.0 86:147.0 89:833.0 91:127.0 94:33.0 95:40.0 98:183.0 99:112.0 100:268.0 101:919.0 102:125.0 103:4123.0 104:411.0 105:159.0 110:296.0 113:77.0 114:97.0 115:131.0 116:352.0 117:3335.0 118:304.0 119:258.0 129:917.0 130:319.0 131:918.0 132:80.0 133:1729.0 134:292.0 144:52.0 147:5348.0 148:1055.0 149:274.0 151:36.0 157:297.0 158:223.0 159:40.0 163:57.0 168:35.0 172:786.0 173:181.0 175:93.0 177…						36413	65222	49684	65535	45265	57091	33583	56997	7108	61420	28884	45849	67069	79338	84540
106940	1179963	204	106940	85:2119.0 86:980.0 87:2148.0 88:809.0 89:3388.0 90:258.0 91:1557.0 92:403.0 93:2235.0 94:919.0 95:5965.0 96:2329.0 97:4731.0 98:3851.0 99:2570.0 100:413.0 101:15945.0 102:1877.0 103:24723.0 104:2560.0 105:2297.0 106:242.0 107:1361.0 108:606.0 109:3155.0 110:1035.0 111:2079.0 112:1100.0 113:1416.0 114:259.0 115:3110.0 116:6371.0 117:10245.0 118:1241.0 119:1818.0 121:2197.0 122:292.0 123:1198.0 124…						6436	4715	3046	8438	2350	3401	2738	3198	10355	6898	3055	11024	2977	2132	3074
106387	825293	204	106387	85:705.0 86:213.0 87:574.0 88:422.0 89:1150.0 90:82.0 92:81.0 93:55.0 95:229.0 97:128.0 98:63.0 99:623.0 101:5694.0 102:870.0 103:22310.0 104:2039.0 105:1028.0 111:409.0 113:352.0 114:43.0 115:924.0 116:2252.0 117:3830.0 118:472.0 119:589.0 120:91.0 123:135.0 125:99.0 127:136.0 128:124.0 129:8186.0 130:1090.0 131:4619.0 132:765.0 133:6261.0 134:861.0 135:639.0 136:35.0 141:298.0 142:251.0 143:421…						156496	169649	184340	152644	177033	169145	100035	155336	145936	134524	63745	167464	148895	137519	132482
106385	867686	217	106385	85:581.0 86:97.0 87:328.0 88:92.0 89:1259.0 90:119.0 91:122.0 97:322.0 98:44.0 99:415.0 100:95.0 101:169.0 102:173.0 103:6858.0 104:651.0 105:525.0 106:85.0 109:89.0 111:185.0 113:405.0 114:555.0 115:650.0 117:3482.0 118:393.0 119:297.0 120:61.0 129:4315.0 130:658.0 133:2170.0 134:281.0 135:137.0 137:36.0 138:21.0 139:51.0 141:146.0 142:262.0 143:1368.0 144:241.0 145:421.0 146:102.0 147:8799.0 14…						7714	10458	5600	2759	3577	6990	4641	8802	14059	11602	4340	7477	16555	7665	4834
106368	1100567	361	106368	85:1415.0 86:340.0 87:636.0 88:842.0 89:1900.0 90:175.0 91:344.0 92:120.0 95:412.0 96:147.0 97:2955.0 98:340.0 99:1429.0 100:259.0 101:5320.0 102:1391.0 103:27551.0 104:2691.0 105:1011.0 106:137.0 107:276.0 109:1122.0 110:171.0 111:796.0 112:173.0 113:1035.0 114:378.0 115:2276.0 116:4675.0 117:7679.0 118:660.0 119:847.0 122:49.0 125:242.0 127:1068.0 128:378.0 129:17962.0 130:2404.0 131:3271.0 132…						4013	3747	3590	5309	3353	3602	1408	3112	4743	4207	2144	4239	2088	1536	1689
106331	1149892	169	106331	88:121.0 89:336.0 90:81.0 97:184.0 99:289.0 101:551.0 102:231.0 103:5307.0 104:314.0 105:229.0 109:526.0 110:78.0 111:85.0 112:56.0 113:160.0 115:253.0 116:270.0 117:1778.0 118:212.0 127:56.0 129:4089.0 130:648.0 131:693.0 132:129.0 133:1504.0 135:60.0 139:59.0 141:92.0 142:227.0 143:968.0 144:68.0 145:408.0 147:3424.0 148:351.0 149:829.0 150:62.0 152:25.0 155:379.0 156:129.0 157:675.0 158:235.0 …						1950	4211	1276	5705	2823	2850	2725	3770	5346	5095	2188	5039	2053	2441	2869
105625	556262	100	105625	85:218.0 97:114.0 100:4672.0 101:227.0 102:127.0 109:63.0 117:275.0 118:32.0 119:46.0 126:34.0 129:271.0 131:222.0 132:58.0 133:384.0 135:31.0 138:56.0 147:865.0 152:11.0 153:41.0 154:496.0 156:396.0 157:29.0 168:14.0 171:40.0 172:295.0 174:133.0 175:126.0 177:32.0 190:426.0 191:36.0 199:31.0 207:40.0 217:44.0 225:17.0 228:107.0 230:48.0 243:25.0 244:986.0 245:1083.0 246:283.0 258:149.0 259:34.0 …						5162	6741	6005	4034	5526	4533	3603	3496	3475	3578	2931	3635	3782	2923	3165
105615	700135	197	105615	85:385.0 87:227.0 89:280.0 92:47.0 93:67.0 94:44.0 97:388.0 98:36.0 99:457.0 100:154.0 101:724.0 102:1103.0 103:993.0 104:113.0 107:55.0 109:130.0 111:329.0 113:109.0 115:267.0 116:232.0 119:250.0 120:34.0 122:22.0 125:228.0 126:70.0 127:385.0 129:4475.0 130:1016.0 131:1657.0 132:187.0 133:2494.0 134:311.0 135:326.0 139:42.0 141:120.0 142:66.0 143:573.0 145:433.0 146:81.0 147:9170.0 148:1312.0 14…						17507	15903	23391	17189	20961	13015	15237	31029	13823	14827	2339	20151	14796	14312	14815
105536	854839	360	105536	85:4296.0 86:1961.0 87:2292.0 88:1599.0 89:26133.0 90:1363.0 91:344.0 92:405.0 93:305.0 94:749.0 96:1210.0 98:1325.0 99:3234.0 100:9162.0 101:7954.0 102:2759.0 103:74804.0 104:8253.0 105:5327.0 106:918.0 107:367.0 108:267.0 109:309.0 110:793.0 111:823.0 112:1056.0 113:2831.0 114:1478.0 115:3191.0 116:1968.0 117:62333.0 118:7465.0 119:4538.0 120:812.0 121:421.0 122:704.0 123:176.0 124:255.0 125:74…						870	836	2692	550	2635	4205	3744	1712	1253	707	9947	1635	1848	2285	2017
105402	828778	433	105402	85:1819.0 87:276.0 88:177.0 89:826.0 90:79.0 95:86.0 96:88.0 98:619.0 99:383.0 100:702.0 101:424.0 103:9654.0 104:745.0 105:348.0 111:108.0 112:192.0 113:196.0 117:3701.0 118:406.0 119:255.0 122:61.0 124:68.0 125:62.0 126:192.0 127:219.0 129:993.0 131:947.0 133:2426.0 134:205.0 135:191.0 137:37.0 138:73.0 141:370.0 143:491.0 145:162.0 147:11883.0 148:2194.0 149:1538.0 150:166.0 151:118.0 152:135.…						2745	829	1008	2658	1173	1786	1777	457	447	775	2654	339	1069	1141	1231
105250	983412	373	105250	85:317.0 87:317.0 88:198.0 89:1069.0 90:132.0 91:71.0 94:40.0 95:186.0 96:69.0 97:373.0 99:308.0 100:79.0 101:697.0 102:151.0 103:10615.0 104:919.0 105:376.0 106:81.0 109:205.0 111:233.0 112:25.0 113:212.0 114:44.0 115:425.0 116:336.0 117:3316.0 118:296.0 119:365.0 120:63.0 121:56.0 122:48.0 125:114.0 127:223.0 128:127.0 129:5634.0 130:655.0 131:1344.0 132:90.0 133:2587.0 134:350.0 135:222.0 139:…						3418	5870	2953	6499	4085	4691	3214	4269	4883	5143	2332	6612	4114	4194	3709
105214	766491	290	105214	93:48.0 102:71.0 119:55.0 130:67.0 131:152.0 142:42.0 144:60.0 145:151.0 148:295.0 156:215.0 158:57.0 159:42.0 160:38.0 170:32.0 172:69.0 173:25.0 174:53.0 182:21.0 184:60.0 186:60.0 188:45.0 200:76.0 202:1109.0 203:240.0 205:101.0 214:31.0 216:233.0 217:59.0 246:15.0 251:22.0 256:14.0 260:16.0 262:21.0 265:19.0 274:89.0 275:48.0 276:87.0 288:87.0 289:108.0 290:2926.0 291:1008.0 292:286.0 293:67.…						2776	2540	3550	3087	2040	1467	1822	3142	2755	3441	1225	2365	1264	1580	1413
105209	1159252	361	105209	87:160.0 88:140.0 89:394.0 99:227.0 101:656.0 102:79.0 103:5654.0 104:297.0 112:31.0 113:256.0 115:261.0 116:332.0 117:1702.0 124:23.0 128:99.0 129:6576.0 130:450.0 131:665.0 132:119.0 133:492.0 139:132.0 141:87.0 142:217.0 143:842.0 144:131.0 145:259.0 147:4462.0 149:608.0 150:115.0 153:124.0 155:392.0 156:136.0 157:917.0 159:42.0 164:13.0 165:32.0 167:86.0 169:3566.0 170:547.0 171:304.0 173:142…						3661	4937	2690	4109	2087	3222	2069	2121	4452	1304	1285	3331	3846	1441	2377
105081	1027932	204	105081	85:231.0 86:114.0 87:216.0 89:601.0 90:95.0 91:157.0 93:44.0 97:247.0 99:441.0 100:87.0 101:1874.0 102:370.0 103:5876.0 104:587.0 105:258.0 109:186.0 111:228.0 113:397.0 114:51.0 115:473.0 116:922.0 117:7779.0 118:718.0 119:293.0 129:8800.0 130:1187.0 131:1216.0 132:272.0 133:1807.0 134:295.0 135:172.0 136:55.0 139:35.0 141:149.0 142:281.0 143:1168.0 144:422.0 145:7496.0 146:883.0 147:10078.0 148…						101603	238299	135494	79782	121264	70124	167015	176161	117142	127738	75904	144139	65283	56097	60369
104535	799686	143	104535	85:719.0 88:190.0 89:129.0 91:290.0 92:84.0 93:904.0 94:384.0 95:3305.0 96:410.0 97:2344.0 98:178.0 99:256.0 100:23.0 101:292.0 102:50.0 103:2607.0 104:212.0 105:139.0 107:428.0 108:177.0 109:2437.0 110:254.0 111:1297.0 112:126.0 113:338.0 114:61.0 115:162.0 116:85.0 117:3156.0 118:299.0 119:213.0 120:46.0 121:532.0 122:129.0 123:1273.0 124:186.0 125:435.0 126:65.0 127:771.0 128:58.0 129:426.0 13…						7795	8610	7530	8490	8892	11045	5228	9083	7094	9651	4546	8329	9886	9750	10909
104377	809370	131	104377	85:385.0 86:195.0 87:874.0 88:306.0 89:1832.0 90:157.0 91:119.0 92:128.0 94:23.0 96:67.0 97:134.0 98:18.0 99:240.0 100:214.0 101:4147.0 102:501.0 103:1794.0 104:314.0 105:269.0 108:42.0 109:132.0 110:38.0 111:97.0 112:250.0 113:175.0 114:139.0 115:762.0 116:973.0 117:11523.0 118:1267.0 119:649.0 120:97.0 121:77.0 122:64.0 123:46.0 124:87.0 125:20.0 126:228.0 127:420.0 128:210.0 129:1475.0 130:518…						14272	16719	14454	17164	13530	16646	8648	12365	11881	10232	7040	12045	13943	14269	13863
102913	969704	259	102913	86:102.0 87:46.0 88:111.0 89:884.0 90:54.0 94:32.0 96:77.0 97:389.0 98:66.0 101:1714.0 102:288.0 103:5693.0 105:401.0 107:42.0 108:17.0 110:31.0 111:138.0 114:71.0 115:633.0 116:997.0 117:3283.0 118:329.0 120:33.0 127:259.0 128:36.0 129:2861.0 131:720.0 132:159.0 133:1418.0 143:535.0 144:27.0 145:104.0 146:44.0 147:9057.0 148:577.0 150:138.0 151:26.0 155:138.0 157:1185.0 158:138.0 159:154.0 161:4…						2766	2673	2706	4232	1833	2611	1406	2366	1712	1669	696	1894	1772	1213	1353
102715	956981	271	102715	85:192.0 86:217.0 87:161.0 89:2168.0 90:70.0 96:41.0 97:266.0 99:362.0 100:565.0 101:1463.0 102:342.0 103:4068.0 104:343.0 105:1107.0 106:36.0 109:174.0 111:398.0 113:486.0 114:204.0 115:329.0 116:948.0 117:4894.0 118:404.0 119:15.0 120:102.0 125:45.0 127:353.0 128:187.0 129:4021.0 130:653.0 131:1480.0 132:266.0 133:2533.0 134:259.0 135:212.0 139:101.0 141:182.0 142:244.0 143:974.0 144:211.0 145:…						15779	17340	20201	28825	15831	21891	15374	16597	25141	28428	10689	26660	16753	13752	13215
100947	962330	307	100947	86:242.0 88:61.0 89:4923.0 91:364.0 95:81.0 97:466.0 100:475.0 101:1678.0 102:364.0 103:17372.0 104:2571.0 105:585.0 107:174.0 109:221.0 116:1185.0 117:3159.0 118:265.0 119:365.0 121:163.0 123:23.0 127:382.0 129:2461.0 130:998.0 131:2067.0 133:1182.0 134:406.0 135:721.0 140:69.0 141:274.0 142:769.0 143:2011.0 146:104.0 147:8087.0 148:990.0 149:2844.0 150:128.0 151:84.0 152:108.0 153:27.0 158:205.…						3046	3865	3504	3118	2773	2337	4647	3472	2610	3302	978	3667	2219	1774	1962
100897	740728	103	100897	85:390.0 87:338.0 88:85.0 89:2865.0 90:214.0 91:229.0 95:50.0 97:119.0 99:100.0 100:406.0 101:997.0 102:164.0 103:10935.0 104:972.0 105:599.0 110:25.0 111:84.0 113:179.0 114:531.0 115:70.0 116:335.0 117:4097.0 118:433.0 127:149.0 128:55.0 129:3373.0 130:402.0 131:86.0 132:262.0 133:2977.0 134:249.0 135:156.0 139:24.0 141:64.0 142:114.0 145:148.0 147:10569.0 148:1449.0 149:1109.0 154:58.0 157:2018…						26821	14094	37357	14503	37268	30003	11562	56105	18503	10267	12500	25826	25606	20542	18958
100896	1044260	219	100896	87:115.0 88:113.0 89:785.0 90:74.0 100:117.0 101:140.0 102:296.0 105:296.0 114:79.0 115:186.0 116:13.0 117:251.0 128:53.0 129:569.0 132:39.0 133:386.0 135:78.0 144:37.0 146:58.0 147:776.0 148:306.0 149:120.0 157:309.0 158:64.0 159:26.0 160:1458.0 161:189.0 162:50.0 174:40.0 175:78.0 186:19.0 189:143.0 202:40.0 203:188.0 207:192.0 216:28.0 217:418.0 218:112.0 219:5918.0 220:988.0 235:27.0 274:37.0…						39904	36333	19529	34217	16944	24532	9958	33124	7869	10185	5147	12053	18870	13224	14003
100877	937684	307	100877	85:1115.0 86:481.0 87:1257.0 88:877.0 89:10462.0 90:870.0 91:686.0 92:180.0 93:70.0 94:254.0 96:323.0 97:1116.0 98:397.0 99:1057.0 100:792.0 101:5528.0 102:1008.0 103:50174.0 104:4582.0 105:2640.0 106:265.0 107:127.0 108:159.0 109:321.0 110:269.0 111:471.0 112:198.0 113:1420.0 114:1231.0 115:1705.0 116:2027.0 117:13369.0 118:1271.0 119:1315.0 120:210.0 121:92.0 122:40.0 123:27.0 124:156.0 125:92.…						2332	2467	2759	1809	2058	2614	3036	2457	1985	1666	1242	2326	2287	1936	1583
100841	837840	103	100841	85:2666.0 86:616.0 87:301.0 88:224.0 89:2897.0 90:236.0 91:124.0 92:24.0 93:28.0 94:89.0 96:137.0 97:90.0 98:149.0 99:253.0 100:667.0 101:610.0 102:368.0 103:9164.0 104:718.0 105:434.0 106:45.0 110:82.0 111:78.0 112:81.0 113:305.0 114:214.0 115:206.0 116:198.0 117:3358.0 118:298.0 119:235.0 123:111.0 125:28.0 126:74.0 128:337.0 129:1276.0 130:242.0 131:819.0 132:139.0 133:1834.0 134:168.0 135:103…						17417	11641	17746	16219	16817	16091	9143	2788	12575	9924	5584	14672	16369	17968	15409
100491	804268	259	100491	85:97.0 86:91.0 89:1405.0 90:8.0 92:81.0 97:175.0 98:6.0 99:281.0 100:532.0 101:496.0 102:2.0 103:4476.0 104:333.0 109:3.0 110:233.0 113:160.0 114:1160.0 115:175.0 116:625.0 117:3342.0 118:393.0 119:70.0 128:126.0 129:636.0 131:16.0 133:1840.0 139:17.0 141:103.0 143:592.0 144:187.0 145:297.0 146:47.0 147:2728.0 149:487.0 154:26.0 155:126.0 157:430.0 158:103.0 159:87.0 161:32.0 163:107.0 168:35.0 …						973	2849	1357	2397	348	1057	287	860	364	365	190	480	50829	55964	53018
100343	837681	262	100343	85:893.0 86:592.0 87:95.0 88:229.0 89:3926.0 90:295.0 95:114.0 97:2555.0 98:118.0 99:224.0 100:936.0 101:930.0 102:402.0 103:13922.0 104:1306.0 105:1542.0 107:28.0 109:151.0 110:1055.0 111:45.0 113:396.0 114:4626.0 115:506.0 116:639.0 117:4786.0 118:149.0 119:351.0 122:189.0 123:2.0 124:20.0 127:120.0 128:202.0 129:4525.0 130:594.0 131:1127.0 132:18.0 133:2681.0 134:520.0 135:161.0 140:124.0 141:…						3532	940	3488	1783	3427	3164	1497	2577	1822	2069	1428	2624	2130	2297	1701
100017	844931	217	100017	85:110.0 88:31.0 89:513.0 96:77.0 97:335.0 100:50.0 103:3037.0 104:169.0 110:43.0 114:626.0 116:107.0 117:505.0 118:7.0 126:52.0 127:111.0 129:590.0 130:87.0 133:928.0 143:37.0 146:64.0 147:2266.0 148:562.0 152:6.0 157:158.0 158:64.0 165:1.0 169:182.0 170:86.0 172:264.0 173:31.0 175:19.0 188:42.0 189:198.0 190:75.0 191:1251.0 192:226.0 194:4.0 201:30.0 202:14.0 204:455.0 205:770.0 206:84.0 207:58…						10002	11432	2650	3596	4467	3816	4540	3387	8270	8528	3155	3228	18089	74104	23234
97828	176050	184	97828	86:189.0 88:849.0 89:163.0 90:3573.0 91:1820.0 92:250.0 94:48.0 95:14.0 97:1319.0 100:2408.0 101:101.0 102:2.0 103:6646.0 104:1173.0 106:194.0 107:1005.0 108:376.0 109:50.0 110:1862.0 111:120.0 112:689.0 116:771.0 117:596.0 118:1907.0 119:82.0 120:3582.0 121:300.0 122:34.0 123:42.0 127:361.0 130:2046.0 134:29519.0 135:2842.0 136:1586.0 137:161.0 138:183.0 140:5245.0 141:174.0 143:5160.0 144:357.0…						380723	596293	560950	618436	719764	953309	418454	824086	1022813	742255	633478	1046912	791745	912340	248989
97450	923503	361	97450	85:1530.0 86:498.0 87:371.0 88:306.0 89:10042.0 90:578.0 94:234.0 95:225.0 97:937.0 98:252.0 99:1446.0 100:2820.0 101:3250.0 102:1278.0 103:33893.0 104:3546.0 105:3263.0 106:246.0 109:1049.0 110:255.0 111:1511.0 112:308.0 113:1267.0 114:1102.0 115:1507.0 116:2183.0 117:14184.0 118:1433.0 119:980.0 120:59.0 122:53.0 123:110.0 124:132.0 125:255.0 126:130.0 128:620.0 129:28712.0 130:6150.0 131:4846.…						3551	1975	3516	6257	4494	6204	2855	4187	5131	3466	9641	7841	4609	2353	4089
92740	601736	257	92740	89:50.0 95:38.0 97:3.0 99:24.0 100:17.0 103:9.0 108:7.0 109:51.0 110:75.0 119:2.0 122:22.0 127:183.0 129:392.0 131:56.0 139:11.0 141:55.0 143:337.0 144:136.0 147:916.0 153:140.0 155:78.0 156:13.0 158:48.0 169:407.0 171:57.0 172:10.0 173:37.0 175:1.0 181:36.0 183:68.0 184:102.0 185:49.0 200:57.0 201:318.0 202:65.0 204:71.0 206:53.0 213:26.0 214:62.0 215:21.0 217:37.0 218:7.0 220:6.0 221:6.0 224:4.…						1965	2021	980	1374	1050	11084	1224	1551	1496	1513	845	3504	3968	1921	2947
92727	415139	213	92727	85:449.0 86:664.0 88:244.0 89:4541.0 90:311.0 91:198.0 92:354.0 93:450.0 94:471.0 95:80.0 96:324.0 97:648.0 98:599.0 99:458.0 100:357.0 101:76.0 102:270.0 103:138.0 105:265.0 107:15.0 108:1029.0 109:1290.0 110:570.0 111:346.0 112:3341.0 113:413.0 114:634.0 116:15.0 118:6.0 123:809.0 124:669.0 125:88.0 126:209.0 127:155.0 128:94.0 129:18.0 130:336.0 131:741.0 132:192.0 134:56.0 137:82.0 138:353.0 …						1014	1310	1181	1069	1510	2132	698	1298	1214	1221	826	1222	1963	2815	1892
89252	907596	173	89252	85:92.0 86:107.0 87:115.0 90:56.0 91:1301.0 92:114.0 93:768.0 94:184.0 95:577.0 96:63.0 97:209.0 98:41.0 99:448.0 101:800.0 102:121.0 103:7998.0 104:590.0 105:683.0 107:486.0 108:82.0 109:457.0 111:244.0 112:33.0 113:198.0 114:90.0 115:366.0 116:569.0 117:931.0 119:563.0 121:230.0 122:85.0 123:157.0 125:56.0 127:190.0 128:100.0 129:2459.0 130:319.0 131:946.0 132:157.0 133:1230.0 134:247.0 135:279…						52953	54931	67562	70908	27203	19232	36970	58343	62521	33703	14863	35899	30561	22184	23045
89209	911006	171	89209	85:384.0 87:201.0 88:105.0 90:55.0 91:1196.0 92:272.0 93:866.0 94:175.0 95:680.0 97:452.0 98:110.0 99:576.0 100:70.0 101:764.0 102:85.0 103:5729.0 104:554.0 105:982.0 106:165.0 107:730.0 108:155.0 109:852.0 110:125.0 111:404.0 112:55.0 113:309.0 114:82.0 115:392.0 116:613.0 117:1448.0 118:109.0 119:792.0 120:151.0 121:224.0 123:182.0 125:182.0 127:366.0 128:63.0 129:9547.0 130:1187.0 131:1573.0 1…						5333	3904	5091	9774	2032	2080	2673	6227	5752	3402	1854	4216	3181	2446	2394
87951	568800	244	87951	85:9.0 86:269.0 89:3483.0 90:209.0 96:30.0 98:172.0 99:219.0 100:448.0 101:912.0 102:117.0 103:3150.0 104:247.0 105:346.0 110:136.0 111:26.0 112:70.0 113:380.0 114:488.0 115:334.0 116:370.0 117:626.0 119:166.0 124:119.0 125:23.0 126:111.0 128:362.0 129:2239.0 130:449.0 131:519.0 132:194.0 133:1740.0 134:151.0 135:15.0 138:2.0 140:48.0 141:127.0 142:2444.0 143:631.0 144:167.0 145:63.0 146:26.0 147…						884	2976	2376	2686	2759	1749	2881	2943	2091	1537	2007	2725	1430	1652	1385
85113	601175	393	85113	85:307.0 86:399.0 87:537.0 88:409.0 89:3172.0 90:154.0 96:62.0 97:186.0 98:203.0 99:330.0 100:843.0 101:1954.0 102:181.0 103:6519.0 104:427.0 105:308.0 111:47.0 112:197.0 113:310.0 115:731.0 117:14629.0 118:1616.0 119:1192.0 120:199.0 121:76.0 126:440.0 127:836.0 129:817.0 131:3685.0 132:874.0 133:8382.0 134:658.0 135:367.0 136:137.0 143:2891.0 145:117.0 147:49431.0 148:7414.0 149:5771.0 150:651.…						956	842	1307	348	987	690	1001	1794	582	497	145	722	970	1311	1451
84925	933256	361	84925	85:81.0 86:216.0 87:268.0 89:522.0 90:170.0 91:145.0 95:101.0 97:85.0 98:102.0 99:216.0 100:273.0 102:229.0 103:2873.0 104:114.0 105:509.0 106:95.0 108:37.0 109:169.0 110:82.0 111:116.0 112:89.0 113:245.0 115:326.0 116:120.0 117:1629.0 118:288.0 119:200.0 120:60.0 124:17.0 128:66.0 129:2391.0 130:367.0 131:222.0 132:240.0 133:431.0 135:190.0 136:29.0 137:20.0 138:89.0 139:55.0 140:51.0 141:140.0 …						21335	23628	15229	27441	15070	18684	20227	18528	22260	19646	12397	22301	20293	16570	18399
84605	411046	233	84605	85:2294.0 87:769.0 88:421.0 89:28527.0 90:1860.0 91:1467.0 94:17.0 99:1127.0 101:23620.0 102:2146.0 103:2199.0 104:254.0 105:486.0 107:465.0 109:49.0 111:87.0 113:9672.0 114:408.0 115:937.0 116:325.0 118:306.0 119:384.0 121:45.0 124:27.0 125:23.0 126:421.0 127:206.0 128:51.0 129:413.0 130:1140.0 131:3270.0 132:573.0 133:6280.0 134:2247.0 135:439.0 136:26.0 137:44.0 139:34.0 141:35.0 142:24.0 143:…						1014	1958	1698	1090	1273	828	3549	2084	813	985	1146	978	1145	1161	1257
84388	1134000	204	84388	87:144.0 88:32.0 89:794.0 90:46.0 91:585.0 92:32.0 94:34.0 97:65.0 100:87.0 101:286.0 102:109.0 103:3929.0 104:253.0 105:735.0 106:105.0 107:147.0 109:313.0 110:55.0 111:113.0 112:55.0 113:106.0 114:56.0 115:392.0 116:380.0 117:2114.0 118:281.0 119:464.0 121:57.0 125:32.0 128:29.0 129:1968.0 130:174.0 131:837.0 132:294.0 133:558.0 137:18.0 139:36.0 141:62.0 142:153.0 143:522.0 144:106.0 145:105.0…						4176	4670	3058	4528	3695	3463	2561	3734	4823	3479	1411	4780	3239	2397	2848
84289	351855	115	84289	85:1310.0 86:1335.0 87:1141.0 88:549.0 89:207.0 90:31.0 91:296.0 92:365.0 93:4833.0 94:405.0 95:2903.0 96:354.0 97:1006.0 98:68.0 99:662.0 101:528.0 102:405.0 103:4264.0 104:631.0 105:264.0 106:260.0 107:982.0 108:786.0 109:189.0 110:5033.0 111:249.0 113:290.0 114:11.0 115:19042.0 116:1073.0 117:8348.0 118:267.0 119:547.0 120:34.0 121:170.0 122:34.0 123:33.0 127:1497.0 128:132.0 129:580.0 130:358…						43094	47040	48367	46501	19304	39685	22761	42359	45875	41897	34299	32225	33305	20334	36372
84288	334222	117	84288	85:1767.0 87:462.0 88:278.0 89:356.0 90:208.0 91:156.0 92:310.0 93:8253.0 94:568.0 95:3706.0 96:182.0 97:379.0 99:688.0 100:328.0 101:1065.0 103:5552.0 104:508.0 105:188.0 106:197.0 107:586.0 108:139.0 109:170.0 110:598.0 111:49.0 113:106.0 115:2634.0 116:229.0 117:36361.0 118:3811.0 119:1447.0 121:45.0 123:614.0 125:306.0 126:3.0 127:301.0 129:804.0 130:3182.0 131:994.0 132:232.0 133:883.0 134:5…						92863	108771	93731	111761	78722	107565	58855	99039	10716	119392	85564	123808	86336	79928	84798
84286	348850	115	84286	85:1773.0 86:494.0 87:1731.0 88:820.0 89:1210.0 90:152.0 91:1113.0 92:483.0 93:9793.0 94:998.0 95:6288.0 96:367.0 97:1304.0 98:376.0 99:941.0 100:165.0 101:1701.0 102:783.0 103:10682.0 104:1070.0 105:1370.0 106:191.0 107:952.0 108:126.0 109:234.0 110:5211.0 111:215.0 112:40.0 113:377.0 114:578.0 115:35495.0 116:3729.0 117:15407.0 118:1570.0 119:1338.0 120:107.0 121:434.0 122:40.0 123:274.0 124:31…						112925	120126	131280	119753	96090	142630	72172	27741	142237	146677	91712	150246	105667	89554	29227
84209	864360	174	84209	86:1406.0 87:85.0 89:34.0 99:112.0 100:480.0 101:309.0 102:100.0 103:1312.0 109:91.0 111:9.0 113:29.0 115:136.0 116:158.0 117:744.0 119:41.0 129:1245.0 130:308.0 131:294.0 133:280.0 141:10.0 143:193.0 144:283.0 145:89.0 146:109.0 147:2985.0 148:256.0 149:373.0 150:23.0 154:33.0 155:99.0 157:498.0 158:117.0 159:40.0 160:12.0 163:39.0 169:736.0 170:79.0 171:548.0 172:156.0 173:118.0 174:7061.0 175:…						47870	45479	64758	94693	89657	129504	67893	97595	119540	67759	36498	93395	113484	159812	178588
84208	1132143	215	84208	85:558.0 89:156.0 90:6.0 91:1319.0 92:243.0 93:1728.0 94:364.0 95:2057.0 96:49.0 97:550.0 99:98.0 100:14.0 101:61.0 103:39.0 104:98.0 105:1172.0 106:1300.0 107:1993.0 108:651.0 109:939.0 110:285.0 111:295.0 115:56.0 116:27.0 117:253.0 118:29.0 119:773.0 120:403.0 121:1088.0 122:319.0 123:356.0 124:18.0 125:73.0 129:644.0 130:160.0 131:587.0 132:17.0 133:670.0 134:215.0 135:684.0 136:165.0 137:115…						3444	2470	1930	4783	2447	2771	1542	2730	3988	3699	1635	3546	3046	2432	3215
84181	589628	217	84181	85:592.0 86:78.0 87:91.0 88:97.0 91:130.0 93:21.0 95:93.0 96:123.0 98:37.0 99:476.0 100:278.0 101:1189.0 102:139.0 103:1346.0 104:73.0 105:111.0 108:24.0 109:318.0 111:111.0 113:265.0 115:316.0 116:429.0 117:491.0 118:94.0 119:144.0 121:121.0 122:43.0 123:34.0 124:29.0 127:232.0 128:245.0 129:2914.0 130:203.0 131:461.0 132:112.0 133:3050.0 134:254.0 135:238.0 137:16.0 138:15.0 139:94.0 141:404.0 …						12694	5242	5710	6182	2396	9044	14478	11645	6915	8993	17304	9294	6560	7834	6721
84116	517387	103	84116	85:144.0 86:64.0 87:351.0 89:236.0 93:11.0 97:5.0 99:77.0 101:796.0 102:91.0 103:8660.0 104:784.0 105:338.0 110:8.0 111:22.0 113:27.0 115:630.0 116:599.0 117:913.0 118:37.0 119:108.0 127:1.0 129:1136.0 130:182.0 131:709.0 132:98.0 133:904.0 134:104.0 135:49.0 141:30.0 143:83.0 147:2600.0 148:912.0 149:453.0 150:27.0 151:20.0 155:403.0 156:155.0 157:106.0 158:107.0 159:71.0 163:6.0 170:4.0 175:16.…						10120	7907	3995	9623	7311	8480	4702	7520	10575	6861	4375	9904	9149	9518	5422
64546	699999	204	64546	85:30135.0 86:56701.0 87:49167.0 88:40901.0 89:43135.0 90:6707.0 95:6207.0 98:14205.0 100:199835.0 101:150460.0 102:81856.0 103:93551.0 104:13994.0 105:12093.0 110:7206.0 112:7694.0 113:9922.0 114:83245.0 115:58818.0 116:253460.0 117:508882.0 118:68764.0 119:36638.0 120:6159.0 125:1837.0 127:7870.0 128:75967.0 129:69709.0 130:92027.0 131:76212.0 132:106173.0 133:141045.0 134:26438.0 135:15392.0 1…						11964	11686	12900	8015	15624	13810	21797	19239	11903	14338	11480	13796	11507	11508	11577
46351	669200	334	46351	160:828.0 226:260.0 274:13.0 277:89.0 291:49.0 332:53.0 333:669.0 334:237.0 335:95.0 336:23.0 364:24.0 365:21.0 371:7.0 393:11.0 394:8.0 401:2.0 402:1.0 423:26.0 462:7.0						1331	2630	1144	713	1140	1924	1542	1195	1396	1250	445	1347	2661	2077	3770
46210	333580	144	46210	125:468.0 140:286.0 144:1409.0 154:48.0 188:1183.0 216:288.0 217:31.0 220:10.0 315:8.0						10240	12323	12100	14203	8580	4463	6565	11498	13332	13428	9992	14571	1212	9215	9790
42049	199668	100	42049	86:650.0 88:42.0 89:3271.0 90:392.0 91:406.0 92:299.0 93:634.0 94:431.0 95:135.0 96:174.0 97:77.0 98:175.0 99:179.0 100:16211.0 101:1225.0 102:3530.0 104:73.0 106:114.0 107:4532.0 108:681.0 110:1484.0 111:281.0 112:455.0 113:1342.0 114:1337.0 115:3296.0 116:333.0 118:963.0 121:163.0 122:247.0 123:238.0 124:82.0 125:38.0 126:663.0 127:48.0 128:474.0 130:3320.0 134:6565.0 135:755.0 136:23.0 137:17.…						6415	7962	8304	9736	6091	6885	4356	8197	8951	8832	35388	10148	4901	5705	6277
34444	953527	259	34444	86:20.0 87:190.0 89:717.0 90:32.0 96:99.0 97:588.0 98:69.0 99:247.0 100:236.0 101:1194.0 102:112.0 103:2430.0 104:139.0 105:313.0 106:83.0 113:168.0 114:76.0 115:719.0 116:428.0 117:779.0 118:62.0 119:126.0 124:50.0 126:70.0 127:145.0 129:1845.0 130:270.0 131:472.0 132:82.0 133:779.0 134:224.0 135:195.0 137:60.0 139:48.0 140:21.0 141:115.0 143:367.0 144:115.0 145:159.0 147:3406.0 148:754.0 149:33…						12686	16050	15175	14799	15065	10731	12322	14229	12513	12326	7806	14587	11371	10033	10567
34113	528242	215	34113	85:556.0 86:274.0 87:455.0 88:669.0 89:556.0 92:2.0 93:65.0 97:252.0 98:92.0 99:693.0 100:1398.0 101:1917.0 102:280.0 103:5474.0 104:739.0 105:464.0 106:279.0 108:2.0 109:211.0 110:290.0 111:466.0 113:1451.0 115:3899.0 117:1173.0 119:218.0 120:40.0 121:145.0 125:657.0 127:174.0 128:976.0 129:5820.0 130:1474.0 131:68.0 132:95.0 133:2641.0 134:397.0 135:182.0 137:178.0 139:155.0 140:1808.0 141:1251…						15573	3279	14242	6518	11043	7358	25666	8502	6707	9327	7547	5784	7961	6985	6326
34104	932355	319	34104	85:434.0 86:122.0 87:193.0 88:124.0 89:1377.0 90:138.0 91:13.0 97:77.0 99:315.0 100:371.0 101:909.0 102:299.0 103:8319.0 104:827.0 105:378.0 106:4.0 107:43.0 108:53.0 109:58.0 110:64.0 111:166.0 112:100.0 113:248.0 114:167.0 115:1279.0 116:499.0 117:5641.0 118:538.0 119:408.0 120:67.0 123:1.0 125:15.0 126:168.0 127:312.0 128:69.0 129:4049.0 130:1659.0 131:2648.0 132:250.0 133:2170.0 134:260.0 135…						4088	2323	3401	2578	2834	3010	3480	2853	1819	2458	532	2213	10437	5762	12697
34089	604262	117	34089	85:518.0 86:806.0 87:265.0 88:275.0 89:577.0 94:12.0 95:394.0 96:322.0 98:151.0 99:379.0 100:3141.0 101:731.0 102:205.0 103:2824.0 104:129.0 105:148.0 106:8.0 107:107.0 109:402.0 110:64.0 111:88.0 112:109.0 113:199.0 114:1518.0 115:1271.0 116:1037.0 117:6779.0 118:751.0 119:343.0 120:6.0 122:32.0 123:38.0 124:174.0 125:48.0 126:948.0 127:81.0 128:318.0 129:1672.0 130:843.0 131:1012.0 132:318.0 13…						323015	340537	193006	456055	309533	449459	270058	262588	354721	209478	187427	587284	267787	242813	250736
34082	494328	254	34082	85:1210.0 86:117.0 87:384.0 89:368.0 93:218.0 97:214.0 98:408.0 99:1766.0 100:1054.0 101:147.0 102:143.0 103:217.0 104:103.0 105:265.0 107:25.0 109:87.0 110:258.0 111:276.0 112:1461.0 114:345.0 120:63.0 121:124.0 122:23.0 125:183.0 126:101.0 127:274.0 128:464.0 132:71.0 135:172.0 137:223.0 138:116.0 139:911.0 140:79.0 141:309.0 142:621.0 143:449.0 146:143.0 149:72.0 151:2.0 153:195.0 154:125.0 15…						3326	3160	3741	3111	3396	3745	2335	4549	3665	3312	1931	5231	3684	2753	2940
34041	319693	174	34041	86:16430.0 88:291.0 89:833.0 91:17.0 100:4163.0 101:344.0 102:1054.0 103:320.0 105:192.0 107:11.0 109:5.0 113:26.0 114:92.0 116:119.0 117:1945.0 118:213.0 119:1028.0 120:107.0 123:32.0 127:330.0 129:243.0 130:1708.0 131:477.0 132:104.0 133:3758.0 134:662.0 135:119.0 137:29.0 144:29.0 146:107.0 148:11.0 149:465.0 154:1.0 157:31.0 160:222.0 161:5.0 162:3.0 163:282.0 166:22.0 172:140.0 173:93.0 174:…						273268	331451	355665	350460	97080	127404	89486	235302	239347	222209	103827	295848	89556	62950	36815
33386	496938	219	33386	87:61.0 88:92.0 89:124.0 91:16.0 94:19.0 95:427.0 98:4.0 99:116.0 100:18.0 101:237.0 102:49.0 103:690.0 105:34.0 106:56.0 107:2.0 109:114.0 111:18.0 113:42.0 114:7.0 115:415.0 116:78.0 117:3205.0 118:247.0 119:141.0 123:15.0 126:2.0 127:5.0 128:10.0 129:1949.0 130:140.0 131:1220.0 132:124.0 133:505.0 134:82.0 139:110.0 141:2.0 143:294.0 147:1473.0 148:319.0 149:650.0 150:13.0 151:41.0 153:36.0 15…						2872	3042	2189	1872	2508	3510	1871	2880	2852	2924	1754	3748	3275	3122	2768
32158	626052	287	32158	86:152.0 87:30.0 90:41.0 92:4.0 93:229.0 94:60.0 95:186.0 96:220.0 97:56.0 98:6.0 99:356.0 100:80.0 109:84.0 110:99.0 111:15.0 113:59.0 114:34.0 115:223.0 121:2.0 125:71.0 131:163.0 141:5.0 143:311.0 144:1.0 145:2.0 147:1836.0 148:256.0 149:212.0 151:26.0 152:44.0 153:76.0 155:60.0 157:104.0 171:51.0 173:27.0 176:1.0 183:58.0 184:77.0 194:3.0 195:1.0 197:394.0 199:186.0 202:6.0 211:99.0 213:57.0 …						1696	1429	1897	1053	1646	1229	1537	3799	1513	971	673	2083	1819	1987	2029
32148	533104	117	32148	85:495.0 86:429.0 87:91.0 88:113.0 89:150.0 91:17.0 94:19.0 97:51.0 98:1107.0 99:691.0 100:5428.0 101:2546.0 102:1622.0 103:546.0 104:16.0 105:98.0 107:31.0 108:33.0 112:123.0 113:147.0 114:248.0 115:5750.0 116:3000.0 117:10225.0 118:1296.0 119:682.0 124:14.0 125:5.0 126:178.0 127:147.0 128:420.0 129:1818.0 130:441.0 131:1311.0 132:401.0 133:3510.0 134:332.0 135:242.0 140:17.0 142:402.0 143:2918.…						3755	1638	4722	4011	3515	3886	6624	3695	3084	3932	5364	3394	2648	2556	1824
26751	1007900	204	26751	87:58.0 101:12.0 103:1652.0 113:96.0 114:54.0 115:237.0 117:145.0 118:13.0 129:4526.0 130:367.0 131:1872.0 132:53.0 133:721.0 143:236.0 145:90.0 147:3342.0 148:199.0 149:49.0 153:80.0 155:178.0 159:123.0 163:11.0 166:43.0 169:291.0 175:490.0 176:103.0 181:17.0 183:159.0 186:1.0 187:22.0 188:34.0 189:366.0 191:1333.0 192:26.0 193:21.0 196:85.0 197:140.0 201:245.0 202:24.0 203:42.0 204:9542.0 205:2…						49697	59762	51267	51100	37846	36201	22524	52278	30692	37152	19388	15243	36721	28235	27609
21709	986764	204	21709	85:21.0 87:38.0 89:470.0 90:32.0 91:8.0 97:100.0 99:68.0 101:826.0 102:68.0 103:4041.0 104:260.0 105:131.0 111:80.0 113:93.0 115:15.0 116:388.0 117:2770.0 118:164.0 119:107.0 127:56.0 129:2683.0 130:217.0 131:373.0 133:754.0 134:56.0 135:141.0 142:30.0 143:453.0 145:31.0 147:5462.0 148:645.0 149:567.0 151:47.0 155:177.0 157:723.0 159:53.0 161:256.0 163:18.0 169:884.0 170:45.0 171:30.0 175:125.0 1…						82542	90769	79038	77953	90549	57985	13389	96816	61553	47212	35954	62784	64248	20160	23566
21622	873334	217	21622	85:99.0 87:489.0 88:330.0 89:2387.0 90:335.0 91:1884.0 92:81.0 94:15.0 95:5.0 97:149.0 98:114.0 99:666.0 100:213.0 101:1598.0 102:354.0 103:9757.0 104:849.0 105:3166.0 106:287.0 107:752.0 111:677.0 112:93.0 113:720.0 114:189.0 115:912.0 116:900.0 117:5365.0 118:530.0 119:3446.0 120:417.0 121:27.0 125:47.0 128:324.0 129:5619.0 130:426.0 131:2292.0 132:693.0 133:9143.0 134:1698.0 135:1070.0 136:12.…						5560	4479	6551	3954	5311	7312	3926	7057	9241	7038	3688	4973	7445	1469	6114
18388	758632	86	18388	85:1035.0 86:6598.0 87:2036.0 88:790.0 89:4234.0 90:194.0 91:196.0 93:160.0 94:170.0 95:281.0 96:74.0 97:194.0 98:113.0 99:759.0 100:283.0 101:4297.0 102:898.0 103:11777.0 104:866.0 105:523.0 109:418.0 110:5.0 111:480.0 112:38.0 113:838.0 114:387.0 115:1188.0 116:1641.0 117:8967.0 118:706.0 119:977.0 120:31.0 121:60.0 123:42.0 124:101.0 125:81.0 127:347.0 128:245.0 129:7687.0 130:1162.0 131:3111.…						8421	8253	8961	8704	6623	8543	4061	8891	6269	4707	1824	7740	5667	4937	4734
18382	935183	259	18382	85:72.0 86:166.0 87:526.0 88:3.0 89:848.0 90:36.0 91:21.0 92:45.0 94:56.0 95:17.0 97:867.0 98:9.0 99:279.0 100:276.0 101:1680.0 102:330.0 103:4191.0 104:242.0 105:615.0 110:14.0 111:69.0 113:167.0 114:233.0 115:545.0 116:886.0 117:1742.0 118:72.0 119:78.0 121:43.0 124:15.0 125:52.0 126:22.0 127:56.0 128:11.0 129:2776.0 130:305.0 131:489.0 132:53.0 133:1082.0 134:210.0 135:50.0 138:2.0 141:85.0 14…						3448	4363	3630	4269	3246	3541	1575	3952	2348	4339	1662	3759	2569	1519	560
18372	711749	204	18372	89:24.0 92:1.0 93:3.0 96:3.0 97:7.0 98:2.0 101:48.0 103:257.0 109:5.0 110:2.0 111:5.0 112:4.0 113:2.0 119:1.0 120:1.0 123:1.0 124:74.0 125:2.0 126:1.0 127:2.0 128:1.0 129:352.0 131:72.0 133:239.0 135:1.0 139:1.0 140:1.0 141:1.0 142:1.0 147:1399.0 148:17.0 149:142.0 154:1.0 155:1.0 157:1.0 159:1.0 160:1.0 168:2.0 171:3.0 173:1.0 185:3.0 186:1.0 187:1.0 189:152.0 191:71.0 195:1.0 199:2.0 201:2.0 20…						5202	3515	3971	6527	5010	3176	2595	4108	1753	3694	919	1898	1969	1822	1922
18361	950622	361	18361	85:557.0 86:226.0 88:82.0 89:3038.0 90:162.0 91:104.0 92:13.0 93:46.0 94:31.0 95:28.0 97:166.0 98:112.0 99:302.0 100:785.0 101:2284.0 102:697.0 103:7672.0 104:696.0 105:1492.0 106:56.0 107:53.0 108:7.0 109:272.0 111:257.0 113:435.0 114:464.0 115:451.0 116:1087.0 117:4820.0 118:454.0 119:427.0 122:1.0 126:38.0 127:126.0 128:173.0 129:7322.0 130:1261.0 131:1922.0 132:177.0 133:3101.0 134:535.0 135:…						11421	16143	17039	12623	11824	9335	20596	3984	11239	9547	8769	14734	7183	5534	6430
18321	972784	361	18321	85:379.0 86:72.0 87:240.0 88:65.0 89:1083.0 90:159.0 91:280.0 92:147.0 93:105.0 94:124.0 96:29.0 97:112.0 98:87.0 99:251.0 100:164.0 101:934.0 102:193.0 103:6705.0 104:860.0 105:467.0 106:84.0 107:182.0 108:106.0 109:544.0 110:63.0 111:224.0 112:47.0 113:385.0 114:47.0 115:361.0 116:372.0 117:2497.0 118:232.0 119:632.0 120:329.0 121:467.0 122:394.0 123:271.0 125:35.0 126:302.0 127:210.0 129:6147.…						37654	35310	39681	39347	34127	38315	27198	18682	39400	32833	9898	17833	35129	15531	22282
18318	894472	204	18318	85:143.0 86:110.0 87:76.0 88:35.0 89:462.0 92:17.0 95:61.0 97:4.0 99:135.0 100:55.0 101:3107.0 102:256.0 103:16406.0 104:1615.0 105:573.0 113:66.0 115:543.0 116:1785.0 118:15.0 119:77.0 121:7.0 123:49.0 127:244.0 129:3356.0 130:372.0 131:897.0 132:118.0 133:1108.0 134:67.0 135:95.0 142:52.0 143:397.0 144:24.0 145:10.0 147:5838.0 148:809.0 149:768.0 150:32.0 151:2.0 153:12.0 155:1562.0 156:181.0 1…						4725	5108	7496	12348	5801	8034	4601	6945	8498	8835	3043	10282	14311	14984	14591
18270	1100025	204	18270	86:5.0 89:17.0 95:42.0 101:110.0 103:998.0 105:6.0 111:24.0 115:95.0 116:50.0 117:1113.0 118:52.0 119:24.0 129:1416.0 130:251.0 131:193.0 133:40.0 141:11.0 143:277.0 144:47.0 145:27.0 147:1320.0 148:133.0 149:125.0 154:9.0 155:173.0 157:207.0 159:23.0 163:28.0 169:146.0 171:21.0 173:10.0 182:2.0 183:67.0 187:19.0 189:117.0 191:318.0 192:3.0 197:41.0 204:1943.0 205:575.0 206:131.0 207:90.0 208:67.…						15174	18007	11985	18187	10607	15806	6774	11970	13870	12277	4974	14756	11132	8915	5692
18255	336556	184	18255	85:218.0 86:60.0 87:58.0 89:299.0 98:3135.0 99:1041.0 107:33.0 110:962.0 111:16.0 112:124.0 114:86.0 128:31.0 129:531.0 130:52.0 140:2863.0 141:261.0 142:51.0 157:705.0 158:22.0 184:5073.0 185:533.0 186:184.0 199:126.0 201:28.0						3637	5097	5114	7180	4333	5474	1705	5138	6862	6000	2547	7967	5174	5715	5986
18192	1035050	204	18192	85:20.0 86:41.0 87:23.0 89:45.0 90:17.0 96:70.0 99:75.0 101:253.0 102:334.0 103:1223.0 104:99.0 105:162.0 109:27.0 111:48.0 113:39.0 114:11.0 115:91.0 116:60.0 117:332.0 118:75.0 121:61.0 122:19.0 124:21.0 127:186.0 128:26.0 129:970.0 130:118.0 131:447.0 133:708.0 134:16.0 135:194.0 141:98.0 142:5.0 143:635.0 144:74.0 145:142.0 147:4006.0 148:613.0 149:487.0 150:27.0 151:68.0 153:3.0 155:85.0 157…						45309	59187	35177	81722	47522	39088	33991	35195	67506	68323	32736	80773	37431	36298	28663
18176	421354	148	18176	85:114.0 87:119.0 88:148.0 89:3659.0 90:441.0 91:1532.0 92:138.0 93:19.0 97:172.0 98:58.0 99:93.0 100:504.0 101:2549.0 102:979.0 104:145.0 105:502.0 106:158.0 107:27.0 110:41.0 111:27.0 112:24.0 114:60.0 115:86.0 116:2674.0 117:1318.0 118:447.0 119:357.0 120:70.0 121:6.0 122:10.0 123:81.0 124:46.0 128:203.0 131:331.0 132:1879.0 133:1270.0 134:290.0 135:94.0 136:3.0 137:10.0 138:13.0 139:18.0 140:…						2917	3323	3344	3123	2016	3015	1532	2659	2729	2068	1395	2836	1898	1983	1838
18163	921595	268	18163	85:2360.0 86:685.0 87:2301.0 88:1753.0 89:9227.0 90:1616.0 91:1890.0 92:287.0 93:185.0 94:242.0 95:512.0 96:220.0 97:1973.0 98:345.0 99:2336.0 100:695.0 101:7577.0 102:1948.0 103:32367.0 104:3281.0 105:3126.0 106:1193.0 107:2786.0 108:336.0 109:1625.0 110:158.0 111:1440.0 112:233.0 113:1760.0 114:688.0 115:3078.0 116:3477.0 117:12774.0 118:1386.0 119:2640.0 120:331.0 121:291.0 122:48.0 123:82.0 1…						903	1647	2121	817	646	3169	1696	2079	2378	3586	949	537	999	2032	1954
18157	467115	228	18157	85:235.0 86:215.0 87:258.0 88:295.0 89:529.0 90:130.0 91:260.0 92:92.0 93:160.0 95:132.0 96:40.0 97:74.0 98:60.0 99:108.0 100:34.0 101:1326.0 102:210.0 103:2274.0 104:325.0 105:193.0 106:55.0 107:112.0 108:197.0 110:7544.0 111:302.0 112:39.0 113:111.0 114:58.0 115:246.0 116:841.0 117:1092.0 118:330.0 119:174.0 120:129.0 121:67.0 122:1.0 123:19.0 124:28.0 126:224.0 127:75.0 128:46.0 129:2101.0 130…						50244	49134	50926	40313	64262	54429	51894	44065	31841	27372	20293	43124	27510	19131	16933
18046	865426	92	18046	85:1781.0 86:66.0 89:721.0 92:15850.0 93:1913.0 94:177.0 95:129.0 99:406.0 100:18.0 101:1090.0 102:191.0 103:7157.0 104:219.0 105:118.0 106:80.0 107:116.0 108:132.0 111:265.0 113:303.0 114:92.0 115:2897.0 116:943.0 117:5629.0 118:492.0 123:12.0 127:40.0 129:7748.0 130:1714.0 131:2102.0 132:19.0 133:2335.0 134:638.0 135:6.0 138:734.0 141:213.0 142:100.0 143:1770.0 144:265.0 145:98.0 147:9522.0 148…						7763	8932	8234	7756	8618	3690	3897	8025	7722	6105	3830	5426	7407	6069	5377
18044	502148	174	18044	85:257.0 86:2357.0 87:1.0 88:121.0 95:6.0 100:911.0 102:113.0 108:11.0 109:299.0 110:426.0 111:2883.0 112:57.0 113:280.0 114:414.0 115:119.0 116:132.0 123:22.0 126:112.0 128:955.0 130:805.0 134:192.0 138:3095.0 139:75.0 140:154.0 141:143.0 142:555.0 143:765.0 144:134.0 147:279.0 149:300.0 153:54.0 168:7.0 169:243.0 171:511.0 172:286.0 174:7043.0 175:1077.0 176:392.0 181:11.0 184:511.0 185:289.0 1…						1074	1160	1156	1185	2001	1679	404	2348	1777	1691	1739	1974	977	1439	1495
18023	1100817	309	18023	85:1307.0 86:191.0 87:162.0 91:748.0 92:25.0 93:92.0 94:5.0 95:811.0 96:109.0 97:2356.0 98:203.0 99:590.0 100:86.0 101:264.0 103:2266.0 104:124.0 109:421.0 111:1638.0 112:103.0 113:268.0 114:72.0 115:847.0 116:262.0 117:4342.0 118:604.0 119:293.0 120:66.0 121:15.0 123:95.0 124:62.0 125:508.0 126:71.0 128:173.0 129:3781.0 130:1003.0 131:826.0 132:52.0 133:762.0 135:144.0 136:92.0 139:182.0 140:8.0…						2019	2669	2160	1217	987	4662	1801	3542	8165	5723	1668	5350	3961	5834	5882
17942	873859	243	17942	85:601.0 86:161.0 87:347.0 88:54.0 89:1284.0 90:443.0 93:236.0 94:41.0 97:578.0 98:425.0 99:1580.0 101:1640.0 102:203.0 103:20283.0 104:2557.0 105:2553.0 106:533.0 107:492.0 108:898.0 109:3452.0 110:222.0 111:645.0 112:206.0 113:1132.0 114:681.0 116:1006.0 117:3290.0 118:553.0 119:617.0 120:378.0 121:804.0 122:563.0 123:837.0 124:404.0 125:408.0 127:497.0 129:13014.0 130:1364.0 131:909.0 132:456.…						855	715	140	511	598	1013	485	796	1123	895	326	1481	1100	665	850
17872	875820	204	17872	101:112.0 103:283.0 104:9.0 129:148.0 163:9.0 165:11.0 169:309.0 173:424.0 177:8.0 179:63.0 189:163.0 191:237.0 203:17.0 204:3835.0 205:861.0 206:327.0 207:31.0 208:10.0 209:238.0 210:51.0 217:740.0 218:144.0 219:86.0 231:67.0 232:15.0 241:7.0 243:52.0 244:12.0 245:19.0 247:5.0 248:8.0 249:3.0 265:30.0 267:133.0 268:123.0 271:12.0 273:6.0 281:206.0 282:29.0 287:5.0 291:150.0 292:53.0 295:1.0 305:…						4494	4865	4753	6431	3259	5841	3263	4623	6272	5337	2433	7502	5718	4811	5319
17828	1065032	259	17828	85:30.0 90:1.0 93:7.0 97:361.0 98:163.0 99:243.0 101:248.0 102:96.0 103:5934.0 104:328.0 105:316.0 111:229.0 112:103.0 113:251.0 115:1165.0 116:146.0 117:973.0 119:211.0 122:23.0 127:15.0 129:3320.0 130:33.0 131:245.0 133:736.0 135:433.0 137:50.0 138:12.0 139:50.0 141:211.0 142:13.0 143:741.0 144:127.0 145:455.0 147:3399.0 148:63.0 149:245.0 151:107.0 153:386.0 154:37.0 155:348.0 156:61.0 157:975…						14854	7656	11942	14011	6937	9536	5206	7937	11099	13536	3360	9565	11088	9776	9755
17775	556489	231	17775	85:592.0 86:19.0 98:67.0 99:297.0 101:365.0 102:2528.0 103:19.0 106:123.0 110:44.0 111:158.0 113:180.0 115:1394.0 116:244.0 117:638.0 128:189.0 129:155.0 130:3554.0 131:2391.0 132:129.0 133:2416.0 134:658.0 139:61.0 140:3.0 141:1.0 143:7623.0 144:706.0 145:62.0 147:8963.0 148:1188.0 149:1518.0 150:116.0 155:700.0 157:130.0 158:24.0 159:32.0 163:1.0 171:272.0 172:6.0 173:49.0 179:26.0 180:1.0 181:…						1045	565	661	803	1029	1361	609	393	839	671	327	789	1496	1567	1068
17770	741792	245	17770	85:1157.0 86:69.0 87:74.0 89:4888.0 90:249.0 94:18.0 97:373.0 99:355.0 100:939.0 101:782.0 102:213.0 103:26218.0 104:2185.0 105:798.0 107:98.0 110:64.0 113:369.0 114:1012.0 116:23.0 117:8063.0 118:821.0 119:429.0 127:528.0 128:194.0 129:11030.0 130:1361.0 131:1997.0 132:87.0 133:6905.0 134:743.0 141:77.0 142:263.0 143:1016.0 144:106.0 145:221.0 147:21452.0 148:2962.0 149:1595.0 150:80.0 151:70.0 …						1184	795	1377	806	1313	729	718	2765	1018	702	345	1110	1255	1681	1916
17686	1035242	219	17686	85:254.0 87:634.0 88:726.0 89:360.0 90:71.0 91:340.0 93:90.0 95:36.0 97:137.0 98:57.0 99:320.0 101:769.0 102:966.0 103:4149.0 104:490.0 105:387.0 107:54.0 108:24.0 109:164.0 110:116.0 111:353.0 112:53.0 113:239.0 114:15.0 115:642.0 116:451.0 117:361.0 118:312.0 119:546.0 120:36.0 121:111.0 122:62.0 124:14.0 125:106.0 127:161.0 129:3666.0 130:420.0 131:1765.0 132:60.0 133:3775.0 134:482.0 135:972.…						4159	5685	2876	6815	3404	3920	2350	6131	3177	4160	2539	4140	2826	3576	3200
17483	1074933	259	17483	89:53.0 90:7.0 93:185.0 95:130.0 96:5.0 97:245.0 101:77.0 103:4098.0 104:302.0 117:82.0 120:9.0 121:40.0 122:99.0 129:1656.0 130:156.0 132:46.0 135:175.0 136:66.0 137:119.0 141:97.0 145:64.0 146:88.0 147:698.0 150:119.0 151:6.0 155:25.0 156:33.0 157:308.0 161:218.0 162:14.0 163:158.0 164:56.0 165:36.0 167:177.0 169:1025.0 170:188.0 171:135.0 173:224.0 174:8.0 175:122.0 177:168.0 178:26.0 179:254.…						3271	2649	2701	4657	2636	3974	1729	2326	3793	3931	1082	3504	3343	3033	2758
17480	1056271	217	17480	86:50.0 89:88.0 90:1.0 92:30.0 95:1.0 96:52.0 97:9.0 98:1.0 101:163.0 103:1725.0 104:428.0 105:6122.0 106:422.0 111:143.0 112:25.0 113:46.0 115:278.0 116:84.0 117:197.0 118:96.0 119:269.0 120:21.0 121:78.0 123:33.0 129:1979.0 130:190.0 131:37.0 133:131.0 134:49.0 135:312.0 136:20.0 138:8.0 141:73.0 142:85.0 143:420.0 144:5.0 145:139.0 147:94.0 150:60.0 153:91.0 155:89.0 157:161.0 159:166.0 161:12…						15630	12247	11961	5850	13723	9856	4204	16946	9818	5687	4516	2808	5460	7801	6125
17471	843475	204	17471	85:110.0 89:6.0 95:82.0 100:51.0 103:895.0 110:42.0 111:39.0 116:44.0 117:231.0 118:11.0 129:699.0 131:82.0 133:61.0 143:183.0 145:47.0 147:936.0 153:53.0 155:34.0 159:707.0 160:71.0 163:27.0 169:218.0 170:51.0 171:218.0 177:36.0 189:249.0 191:385.0 192:54.0 193:172.0 195:11.0 202:7.0 203:79.0 204:4862.0 205:912.0 206:316.0 207:252.0 209:18.0 212:6.0 217:841.0 218:133.0 219:85.0 221:12.0 222:31.0…						2985	3484	2759	2802	2273	2544	1230	2226	2626	1405	602	2023	4448	4926	4106
17463	694324	204	17463	85:159.0 86:155.0 87:114.0 89:698.0 100:135.0 101:640.0 103:1657.0 106:79.0 109:25.0 116:390.0 117:1104.0 119:689.0 120:89.0 126:10.0 129:1550.0 130:221.0 131:167.0 132:71.0 133:925.0 135:135.0 137:16.0 140:3.0 142:15.0 143:313.0 144:15.0 145:81.0 147:2480.0 149:339.0 153:32.0 155:173.0 156:16.0 157:189.0 159:58.0 160:24.0 161:16.0 163:60.0 169:280.0 170:6.0 171:64.0 173:51.0 175:1118.0 176:123.0…						6604	6141	4507	5745	10487	5731	3927	5013	6814	12715	2772	8360	5676	5520	5806
17453	944689	204	17453	85:63.0 87:16.0 90:13.0 91:97.0 95:53.0 99:28.0 101:353.0 103:1510.0 104:193.0 105:59.0 113:13.0 114:2.0 115:83.0 116:215.0 117:222.0 118:14.0 119:12.0 121:55.0 122:18.0 124:12.0 125:15.0 129:2019.0 130:57.0 131:348.0 133:891.0 135:67.0 141:46.0 142:36.0 143:652.0 144:46.0 145:22.0 147:4369.0 148:425.0 149:558.0 151:136.0 155:179.0 156:18.0 157:299.0 158:16.0 159:13.0 161:16.0 162:28.0 163:126.0 …						4574	6129	3312	29393	3949	6446	2256	3185	16478	17312	9625	17219	12547	13431	11816
17449	934634	259	17449	85:77.0 86:118.0 89:142.0 95:18.0 97:437.0 99:141.0 101:741.0 103:6814.0 104:638.0 109:25.0 112:10.0 115:93.0 116:871.0 117:973.0 118:20.0 119:1216.0 120:104.0 123:7.0 129:4841.0 130:563.0 131:220.0 132:510.0 133:699.0 139:63.0 141:141.0 142:76.0 143:170.0 144:6.0 145:614.0 146:2.0 147:49.0 150:7.0 151:130.0 156:48.0 157:547.0 158:66.0 159:77.0 161:164.0 163:62.0 165:126.0 169:1027.0 170:130.0 17…						6796	7409	5930	9293	7090	7625	6400	7357	8473	7394	3213	7856	7757	4226	3996
17435	850897	245	17435	85:247.0 86:50.0 87:4.0 89:2725.0 90:193.0 91:14.0 92:73.0 94:61.0 99:179.0 100:742.0 101:691.0 102:120.0 103:4699.0 104:331.0 105:194.0 110:28.0 112:37.0 113:208.0 114:75.0 115:125.0 116:450.0 117:5372.0 118:355.0 119:534.0 120:100.0 121:91.0 122:26.0 123:2.0 124:17.0 125:20.0 126:187.0 128:200.0 129:1077.0 130:85.0 131:934.0 132:87.0 133:3022.0 134:249.0 135:404.0 136:94.0 138:41.0 140:127.0 14…						1561	919	1823	1163	1819	2911	2178	1511	1251	836	6034	1643	1176	1563	1355
17433	816037	245	17433	85:755.0 86:306.0 87:33.0 88:153.0 89:3584.0 90:249.0 91:56.0 93:12.0 94:68.0 96:601.0 98:243.0 99:638.0 100:2388.0 101:1041.0 102:175.0 103:9576.0 104:912.0 105:693.0 106:72.0 109:91.0 110:192.0 111:90.0 112:98.0 113:367.0 114:252.0 115:97.0 116:287.0 117:6439.0 118:637.0 119:382.0 120:84.0 121:35.0 122:134.0 123:6.0 124:96.0 125:99.0 126:747.0 127:31.0 128:667.0 129:3274.0 130:357.0 131:1545.0 …						2339	1095	575	1146	1329	2633	1832	1286	616	719	5809	764	2150	1243	751
17425	933003	204	17425	85:85.0 86:263.0 87:38.0 89:602.0 91:4.0 93:247.0 94:88.0 95:127.0 98:14.0 99:271.0 100:21.0 101:1863.0 102:255.0 103:8880.0 104:729.0 105:307.0 109:124.0 111:409.0 113:766.0 114:72.0 115:143.0 116:1020.0 117:2736.0 118:249.0 119:407.0 120:36.0 121:181.0 123:25.0 124:13.0 125:99.0 126:76.0 127:137.0 128:89.0 129:10627.0 130:1278.0 131:1740.0 132:333.0 133:3793.0 134:521.0 135:893.0 136:19.0 137:7…						21652	21515	24802	24193	22262	19328	29557	11826	8746	21804	13050	4358	8784	25518	24067
17421	606091	265	17421	85:29289.0 86:4687.0 87:33617.0 88:9326.0 89:21399.0 90:2351.0 91:9968.0 92:2019.0 93:8190.0 94:3790.0 95:6416.0 96:1811.0 97:8779.0 98:6675.0 99:49836.0 100:7435.0 101:133927.0 102:33176.0 103:531383.0 104:51076.0 105:44485.0 106:4167.0 107:2794.0 108:2829.0 109:13452.0 110:1998.0 111:54930.0 112:8970.0 113:65097.0 114:12858.0 115:82390.0 116:63084.0 117:120781.0 118:17606.0 119:70797.0 120:9282…						866	942	946	1223	166	460	623	654	1123	1034	523	1319	733	711	660
17389	1023373	369	17389	86:2.0 88:79.0 90:3.0 95:463.0 96:20.0 101:128.0 103:452.0 105:212.0 107:100.0 113:560.0 119:134.0 125:15.0 129:436.0 132:14.0 140:12.0 141:40.0 145:44.0 146:44.0 151:7.0 154:65.0 156:14.0 157:211.0 159:18.0 161:42.0 162:69.0 164:9.0 165:165.0 166:92.0 169:59.0 171:18.0 173:53.0 176:38.0 177:103.0 178:121.0 179:657.0 180:36.0 181:80.0 185:44.0 189:170.0 190:19.0 191:1299.0 192:166.0 193:218.0 194…						38416	37001	35210	32851	23662	23611	4079	35210	21054	26810	12793	29824	36854	32176	30620
17349	585683	359	17349	85:190.0 87:3273.0 90:26.0 92:11.0 95:337.0 96:285.0 97:225.0 98:732.0 99:248.0 101:86.0 104:144.0 107:16.0 108:2.0 109:58.0 110:11.0 111:289.0 112:18.0 113:295.0 114:12.0 115:198.0 116:150.0 118:60.0 119:59.0 120:64.0 121:39.0 123:81.0 124:106.0 125:101.0 127:72.0 128:16.0 130:224.0 132:60.0 133:988.0 134:425.0 135:200.0 137:4.0 139:17.0 140:192.0 141:183.0 142:181.0 143:529.0 145:40.0 146:176.0…						2060	2787	2885	3237	3885	4657	2474	4982	4453	4694	1642	4838	2740	2734	2945
17327	1031478	219	17327	85:96.0 87:149.0 99:8.0 100:104.0 101:341.0 102:79.0 103:225.0 105:297.0 106:146.0 110:48.0 111:11.0 112:14.0 113:1.0 114:30.0 115:983.0 117:53.0 119:221.0 120:151.0 121:5.0 124:51.0 129:85.0 131:77.0 133:1294.0 134:77.0 135:944.0 137:35.0 141:294.0 143:526.0 144:38.0 145:11.0 147:2774.0 148:486.0 149:468.0 151:376.0 152:19.0 153:5.0 155:113.0 156:128.0 157:73.0 159:63.0 161:95.0 163:27.0 164:95.…						2077	1934	1604	1594	1816	1798	1268	2492	1519	1000	1155	1922	1718	1911	1493
17302	1136131	361	17302	103:966.0 104:6.0 119:49.0 125:41.0 129:576.0 130:9.0 143:11.0 146:29.0 147:101.0 155:118.0 157:209.0 161:65.0 164:25.0 165:27.0 166:6.0 167:48.0 169:1359.0 170:173.0 171:44.0 173:57.0 175:18.0 179:212.0 189:174.0 191:57.0 192:7.0 193:635.0 194:53.0 196:64.0 203:62.0 204:1602.0 205:413.0 206:103.0 207:81.0 208:205.0 210:20.0 217:841.0 218:141.0 219:72.0 220:26.0 221:185.0 222:331.0 223:44.0 224:8…						2675	4154	2760	4023	2185	2830	2250	2913	4184	3977	1691	4784	2932	2592	2444
17297	840974	217	17297	85:125.0 86:18.0 88:16.0 89:1566.0 90:105.0 96:147.0 97:898.0 98:609.0 99:123.0 100:544.0 101:348.0 103:11605.0 104:984.0 105:456.0 110:11.0 114:404.0 116:64.0 117:2694.0 118:346.0 119:88.0 121:45.0 123:3.0 126:113.0 127:49.0 128:16.0 129:1198.0 130:260.0 131:344.0 133:3068.0 134:259.0 135:113.0 140:14.0 141:35.0 142:167.0 143:211.0 144:51.0 145:123.0 146:11.0 147:6812.0 148:793.0 149:95.0 154:54…						4272	4366	2715	7426	8059	4090	4657	5519	6355	6002	1745	6772	10033	934	11323
17240	1006990	236	17240	85:968.0 86:63.0 89:548.0 91:317.0 92:173.0 93:793.0 94:901.0 95:304.0 96:13.0 102:33.0 103:2039.0 104:140.0 105:596.0 106:493.0 107:880.0 108:322.0 109:422.0 112:78.0 115:78.0 116:295.0 117:373.0 118:228.0 119:529.0 120:1029.0 121:598.0 122:325.0 123:93.0 124:92.0 127:222.0 128:32.0 129:479.0 130:55.0 131:1.0 132:16.0 133:1048.0 134:1019.0 135:231.0 137:81.0 138:70.0 142:13.0 144:84.0 145:398.0 …						8735	10413	9978	8817	5362	6692	3250	7285	4142	5392	2464	4167	7006	4920	4573
17198	1038680	219	17198	89:40.0 92:11.0 93:76.0 95:19.0 103:158.0 106:57.0 109:299.0 115:4.0 116:11.0 117:333.0 119:180.0 120:84.0 122:46.0 123:190.0 124:217.0 125:17.0 129:301.0 130:2.0 131:18.0 133:122.0 135:110.0 136:55.0 137:2.0 139:11.0 141:22.0 142:33.0 143:329.0 144:45.0 145:39.0 146:74.0 147:833.0 149:75.0 151:190.0 155:114.0 156:406.0 157:181.0 158:4.0 159:4.0 161:55.0 162:6.0 163:68.0 166:18.0 167:442.0 168:71…						19529	16674	15601	18322	15197	17358	9261	20000	11160	11720	7259	16310	15960	13048	12489
17186	1029230	217	17186	85:171.0 86:98.0 89:391.0 90:221.0 91:17904.0 92:1163.0 97:234.0 99:2.0 101:734.0 103:4501.0 104:410.0 105:210.0 109:71.0 111:53.0 113:149.0 114:92.0 115:929.0 116:301.0 117:1083.0 119:197.0 120:22.0 121:97.0 125:184.0 129:3836.0 130:353.0 131:328.0 133:912.0 135:157.0 136:66.0 141:147.0 142:10.0 143:772.0 144:84.0 145:435.0 146:46.0 147:3829.0 148:522.0 149:369.0 150:49.0 151:7.0 153:59.0 155:15…						6736	10092	8014	8383	7959	6586	3995	5275	4629	4050	2450	5923	8409	6964	3209
17082	898960	204	17082	85:151.0 86:149.0 87:5.0 88:71.0 89:1463.0 90:229.0 91:526.0 92:48.0 93:212.0 94:166.0 95:477.0 96:310.0 98:74.0 99:707.0 101:2200.0 102:423.0 103:6595.0 104:703.0 105:772.0 106:1.0 107:356.0 109:557.0 110:269.0 111:385.0 112:236.0 113:444.0 114:137.0 115:561.0 116:957.0 117:2873.0 118:173.0 119:557.0 120:55.0 121:222.0 122:82.0 123:208.0 125:8.0 127:146.0 128:113.0 129:5396.0 130:798.0 131:1568.…						6951	6611	3345	18153	4792	3953	3962	4050	5344	11520	1876	3867	3933	4988	5870
17050	963668	458	17050	85:1294.0 86:212.0 87:606.0 88:165.0 89:2037.0 90:680.0 91:1177.0 93:561.0 94:75.0 95:196.0 96:548.0 97:978.0 98:318.0 99:908.0 101:2260.0 102:642.0 103:26127.0 104:2385.0 105:1699.0 106:1.0 107:599.0 108:133.0 109:2245.0 110:344.0 111:1018.0 112:70.0 113:1397.0 114:228.0 115:1510.0 116:1193.0 117:7592.0 118:919.0 119:1344.0 120:29.0 121:350.0 122:60.0 125:113.0 126:20.0 127:224.0 128:142.0 129:2…						17912	17033	20578	17915	20240	15415	10813	19565	16928	14663	5224	18576	11034	9175	9247
17045	1041467	204	17045	85:141.0 86:1.0 89:219.0 90:133.0 91:23875.0 92:1755.0 93:162.0 96:68.0 98:29.0 99:162.0 101:1217.0 102:144.0 103:1719.0 104:138.0 105:305.0 106:54.0 108:35.0 111:246.0 112:9.0 113:124.0 115:1503.0 116:487.0 117:2529.0 118:162.0 119:24.0 121:83.0 129:4393.0 130:1935.0 131:1371.0 132:229.0 133:1181.0 135:242.0 136:99.0 137:5.0 141:122.0 142:132.0 143:1171.0 144:156.0 145:431.0 146:6.0 147:4156.0 1…						12093	8026	8688	4752	6795	14672	1372	11539	3571	17058	1839	11165	12649	10786	5095
16872	861938	204	16872	86:41.0 88:187.0 89:514.0 90:99.0 101:2760.0 102:228.0 103:3428.0 104:217.0 113:93.0 115:297.0 116:1747.0 117:5043.0 118:452.0 121:118.0 129:3532.0 130:323.0 131:489.0 132:32.0 133:1329.0 135:86.0 141:53.0 142:22.0 143:768.0 144:45.0 145:8.0 147:7839.0 148:1100.0 149:726.0 150:5.0 153:24.0 155:226.0 157:411.0 161:180.0 162:14.0 163:63.0 169:540.0 170:17.0 174:13.0 175:50.0 179:22.0 181:2.0 183:22…						9776	10896	11925	13046	9175	12466	8824	15092	13285	13924	4640	16435	11932	11782	9007
16835	801945	143	16835	85:136.0 88:1.0 91:1094.0 92:120.0 93:1945.0 94:170.0 95:706.0 96:94.0 98:43.0 99:95.0 100:25.0 103:1423.0 105:1139.0 106:332.0 107:1368.0 108:357.0 109:293.0 111:3.0 115:364.0 117:3289.0 118:115.0 119:739.0 120:141.0 121:1027.0 122:329.0 123:351.0 124:14.0 125:85.0 127:343.0 128:19.0 130:873.0 131:508.0 137:102.0 138:14.0 139:133.0 141:929.0 142:357.0 143:9624.0 144:1318.0 145:884.0 146:76.0 147…						7795	8610	6429	8490	8892	11045	5228	9083	7094	8283	4145	8329	9886	9750	10909
16810	962975	160	16810	85:1050.0 86:259.0 87:474.0 88:6.0 89:3944.0 90:272.0 91:591.0 94:76.0 95:318.0 96:198.0 97:452.0 98:83.0 99:600.0 100:1352.0 101:4264.0 102:1428.0 103:13280.0 104:1408.0 105:2811.0 106:137.0 107:218.0 108:1.0 109:358.0 110:63.0 111:232.0 113:842.0 114:543.0 115:839.0 116:1953.0 117:7841.0 118:598.0 119:757.0 120:270.0 121:134.0 122:59.0 123:61.0 125:81.0 128:240.0 129:11808.0 130:1760.0 131:3719…						1869	2557	1996	2124	1541	1667	1533	2310	1935	1721	1001	2023	1141	1317	839
16793	878731	219	16793	85:1346.0 86:365.0 87:618.0 88:418.0 89:2707.0 90:339.0 91:47.0 92:2.0 93:380.0 94:226.0 95:171.0 96:350.0 97:791.0 98:2.0 99:631.0 100:703.0 101:7801.0 102:1083.0 103:18214.0 104:1818.0 105:3764.0 106:271.0 107:478.0 109:467.0 110:73.0 111:265.0 112:214.0 113:858.0 114:339.0 115:2504.0 116:4401.0 117:10838.0 118:1332.0 119:1246.0 120:189.0 121:287.0 122:220.0 123:4.0 124:123.0 125:360.0 126:36.0…						11426	10147	11212	14656	929	1401	313	956	739	199	326	16513	2102	1528	1442
16641	431940	205	16641	85:518.0 86:489.0 87:366.0 88:254.0 89:1290.0 90:221.0 96:164.0 98:185.0 99:169.0 100:159.0 101:1428.0 102:27.0 103:4891.0 104:448.0 105:30.0 106:72.0 107:881.0 108:21.0 109:17.0 110:856.0 114:352.0 115:406.0 116:259.0 117:8104.0 118:856.0 119:190.0 126:1.0 128:208.0 129:1250.0 130:1331.0 131:2488.0 132:282.0 133:3288.0 134:2442.0 135:75.0 143:30.0 144:128.0 145:902.0 146:218.0 147:11228.0 148:17…						1818	2001	1968	1777	1632	1466	2237	998	1569	1288	3542	2048	2205	2353	2388
16588	626234	275	16588	85:662.0 86:131.0 87:624.0 89:2291.0 90:61.0 91:1.0 100:120.0 101:204.0 102:161.0 104:1.0 105:532.0 106:65.0 107:29.0 110:13.0 112:343.0 113:948.0 114:245.0 116:593.0 119:24.0 120:3.0 127:2.0 130:5.0 131:917.0 132:47.0 133:569.0 134:2.0 135:5.0 141:3.0 142:16.0 143:327.0 145:4.0 146:38.0 147:222.0 148:5.0 150:4.0 153:2.0 159:560.0 160:2957.0 161:361.0 162:23.0 163:233.0 168:9.0 171:294.0 173:18.0…						1466	1226	1271	1432	995	1764	943	1267	1479	1081	483	1474	1838	2374	2579
14806	732132	245	14806	86:4.0 87:17.0 92:23.0 93:11.0 99:2.0 100:11.0 101:75.0 102:82.0 103:86.0 108:4.0 113:2.0 117:43.0 129:109.0 130:57.0 131:137.0 132:10.0 133:283.0 134:137.0 136:3.0 145:6.0 147:990.0 148:92.0 149:137.0 157:1.0 160:2.0 167:6.0 169:6.0 180:5.0 181:8.0 184:1.0 189:34.0 190:5.0 191:14.0 192:8.0 196:2.0 199:1.0 203:9.0 207:24.0 208:2.0 211:1.0 218:13.0 219:19.0 221:3.0 226:6.0 239:1.0 241:1.0 242:2.0 …						38782	26913	50757	28285	37690	28676	26992	75392	31679	22651	6134	34443	47622	46767	53245
14738	555533	103	14738	85:40.0 87:18.0 88:15.0 89:850.0 90:32.0 91:29.0 92:9.0 95:1.0 98:2.0 99:2.0 100:44.0 101:177.0 102:108.0 103:2445.0 104:181.0 105:100.0 106:4.0 107:50.0 108:21.0 109:4.0 110:4.0 111:10.0 112:4.0 113:22.0 115:50.0 116:52.0 117:533.0 118:6.0 119:84.0 121:3.0 122:8.0 123:6.0 124:7.0 126:1.0 127:60.0 129:222.0 130:252.0 131:341.0 132:37.0 133:627.0 134:90.0 135:38.0 136:25.0 137:5.0 139:2.0 140:3.0 …						3665	11147	5889	14444	8668	9869	2358	9759	4451	9685	3559	9437	8882	8733	608
14717	856253	204	14717	87:14.0 89:19.0 92:6.0 96:6.0 98:9.0 100:12.0 101:57.0 102:6.0 103:173.0 108:9.0 110:19.0 112:4.0 113:30.0 115:32.0 116:26.0 117:954.0 118:77.0 119:15.0 122:1.0 126:10.0 129:242.0 130:32.0 131:62.0 132:33.0 133:74.0 141:3.0 145:10.0 147:375.0 148:64.0 149:86.0 154:3.0 155:106.0 157:33.0 161:13.0 169:58.0 171:8.0 173:13.0 176:5.0 177:3.0 183:2.0 189:97.0 191:62.0 192:8.0 193:23.0 195:5.0 198:6.0 1…						3924	10896	3544	2437	1254	5095	2920	2825	3498	3830	10775	2923	3038	3412	2905
14715	1095421	204	14715	85:75.0 86:1.0 87:58.0 88:18.0 89:165.0 90:14.0 91:13.0 92:4.0 94:10.0 95:12.0 96:12.0 97:56.0 98:29.0 99:50.0 100:4.0 101:146.0 102:23.0 103:1945.0 104:174.0 105:72.0 109:145.0 110:8.0 111:81.0 112:11.0 113:48.0 114:10.0 115:45.0 116:166.0 117:532.0 118:54.0 119:89.0 121:26.0 122:12.0 123:14.0 124:14.0 125:19.0 127:24.0 128:3.0 129:1362.0 130:170.0 131:242.0 132:88.0 133:312.0 134:40.0 135:43.0 …						11282	10602	9982	15581	7825	9357	4429	8545	8834	6120	2982	8180	10617	7316	7090
14687	663858	275	14687	85:2162.0 86:79.0 87:127.0 88:18.0 89:3434.0 90:269.0 91:135.0 93:32.0 95:111.0 96:4.0 97:38.0 98:20.0 99:156.0 101:479.0 102:929.0 103:970.0 104:90.0 105:77.0 106:12.0 109:14.0 110:56.0 111:34.0 113:1522.0 114:105.0 115:188.0 116:1555.0 117:701.0 118:102.0 119:223.0 120:39.0 121:5.0 122:7.0 123:9.0 125:9.0 126:10.0 127:234.0 129:1034.0 130:675.0 131:2392.0 132:316.0 133:2726.0 134:322.0 135:187.…						1328	4395	4257	1470	8905	5480	5197	6122	1663	2124	1009	1983	6468	4877	1467
9489	688397	156	9489	85:196.0 86:171.0 89:166.0 94:15.0 96:127.0 97:116.0 99:143.0 100:117.0 110:27.0 112:72.0 113:59.0 114:9.0 116:168.0 117:116.0 124:22.0 125:21.0 126:15.0 130:25.0 139:28.0 140:281.0 142:31.0 149:35.0 150:14.0 152:52.0 154:15.0 156:5114.0 157:778.0 158:778.0 159:48.0 160:40.0 164:1.0 169:59.0 173:9.0 178:9.0 191:49.0 197:13.0 205:83.0 216:54.0 217:458.0 218:61.0 219:49.0 222:39.0 230:33.0 231:60.0…						7238	546	883	1011	416	3527	661	338	284	449	524	435	777	789	1290
8598	801613	204	8598	86:101.0 88:8.0 89:1252.0 90:27.0 91:4.0 94:3.0 95:679.0 96:1.0 97:96.0 98:113.0 101:638.0 103:3239.0 104:260.0 105:28.0 106:34.0 107:4.0 108:1.0 109:159.0 110:83.0 111:615.0 112:30.0 113:286.0 114:90.0 115:17.0 116:686.0 117:913.0 118:13.0 119:15.0 120:1.0 121:1.0 123:46.0 124:3.0 125:2.0 126:11.0 127:7.0 129:1288.0 130:109.0 131:874.0 132:132.0 133:1127.0 134:117.0 135:21.0 136:3.0 138:86.0 139…						12892	9383	3507	11850	10274	10252	5876	410	7698	8264	3849	8701	10147	8803	9435
7543	612226	231	7543	85:4.0 86:51.0 87:79.0 88:97.0 89:876.0 94:34.0 98:44.0 99:40.0 100:124.0 101:340.0 102:72.0 103:588.0 104:50.0 105:206.0 110:12.0 113:35.0 114:86.0 115:106.0 116:441.0 117:1097.0 118:110.0 119:72.0 121:15.0 128:65.0 129:250.0 130:90.0 131:125.0 133:785.0 134:178.0 135:92.0 141:73.0 142:108.0 143:47.0 147:2679.0 148:438.0 149:362.0 150:26.0 157:81.0 158:237.0 159:10.0 160:675.0 161:100.0 163:189.…						1859	2259	2656	2411	3015	2776	4649	3416	2839	2964	3099	3176	1856	1969	2026
7128	478565	217	7128	85:84.0 87:68.0 88:155.0 95:89.0 97:18.0 99:28.0 101:298.0 103:81.0 104:73.0 107:259.0 108:8.0 110:289.0 111:26.0 112:13.0 115:9.0 116:60.0 117:13.0 118:73.0 126:54.0 129:94.0 132:30.0 133:58.0 134:633.0 135:100.0 136:51.0 141:197.0 142:37.0 143:169.0 144:19.0 146:40.0 147:469.0 148:51.0 149:163.0 153:46.0 155:56.0 158:122.0 169:42.0 172:10.0 184:357.0 185:78.0 186:14.0 189:24.0 191:278.0 196:29.…						766237	732653	746894	909246	956684	976042	627571	909841	965111	728392	363810	899183	758772	652570	619584
6435	736475	290	6435	85:189.0 86:20.0 88:97.0 89:1442.0 90:28.0 93:5.0 95:43.0 98:111.0 99:22.0 100:415.0 101:533.0 102:206.0 103:982.0 104:2.0 108:19.0 109:42.0 110:108.0 112:224.0 113:43.0 114:126.0 116:50.0 117:303.0 122:2.0 124:8.0 126:344.0 128:76.0 130:217.0 131:400.0 132:91.0 133:2515.0 134:52.0 135:250.0 138:6.0 139:9.0 141:30.0 142:682.0 143:554.0 144:54.0 145:17.0 147:3175.0 148:978.0 149:454.0 151:33.0 154…						13426	9000	16957	3746	11645	13299	9550	17695	10331	7272	4588	13503	19442	15876	16009
6404	757916	204	6404	85:25.0 86:212.0 89:67.0 99:126.0 100:107.0 101:899.0 103:1783.0 104:17.0 113:141.0 115:28.0 116:177.0 117:1041.0 129:1267.0 130:50.0 131:461.0 132:34.0 133:296.0 141:88.0 143:127.0 144:4.0 145:1074.0 146:96.0 147:2484.0 148:315.0 149:66.0 155:40.0 157:32.0 160:89.0 163:1.0 169:264.0 174:8.0 176:28.0 189:390.0 190:100.0 191:632.0 192:53.0 193:27.0 195:58.0 202:13.0 203:241.0 204:6953.0 205:1256.0…						51104	49453	59733	55276	51043	56852	32271	63045	44821	34204	15523	49316	37915	30283	30882
5523	1079443	85	5523	85:1779.0 86:83.0 89:9.0 93:39.0 95:13.0 96:154.0 97:428.0 98:183.0 99:662.0 100:59.0 103:16.0 105:6.0 110:45.0 111:190.0 112:99.0 113:366.0 114:42.0 115:6.0 118:3.0 122:21.0 124:48.0 125:69.0 127:212.0 128:4.0 130:7.0 137:15.0 138:23.0 139:17.0 140:42.0 141:131.0 144:22.0 145:55.0 153:21.0 155:95.0 156:2.0 157:8.0 158:12.0 159:11.0 161:3.0 163:37.0 164:22.0 165:53.0 166:22.0 167:11.0 168:4.0 169…						30036	60908	23917	39545	11621	11793	5279	3503	40303	22808	7902	12116	20507	18707	18194
5245	178253	184	5245	85:209.0 86:1104.0 88:2110.0 89:683.0 90:5581.0 91:2799.0 92:903.0 93:156.0 94:2.0 96:49.0 97:2479.0 100:3599.0 101:525.0 102:318.0 103:13427.0 104:2123.0 105:850.0 106:106.0 107:1570.0 108:321.0 109:346.0 110:3208.0 111:384.0 112:1394.0 114:34.0 116:1492.0 117:634.0 118:3651.0 119:912.0 120:5847.0 121:748.0 122:245.0 128:3.0 130:1645.0 131:229.0 132:280.0 133:210.0 134:48231.0 135:4701.0 136:221…						389831	600107	564500	621812	792512	949922	420522	829778	1019005	697327	631610	1046912	789105	908850	919037
4766	618681	204	4766	86:89.0 87:265.0 88:82.0 89:180.0 90:24.0 99:138.0 101:1141.0 102:184.0 103:2236.0 104:190.0 105:196.0 106:46.0 110:125.0 111:11.0 113:10.0 114:278.0 115:48.0 116:1300.0 117:622.0 118:121.0 119:45.0 120:38.0 122:5.0 123:60.0 129:1356.0 130:376.0 131:909.0 132:152.0 133:1343.0 134:137.0 135:177.0 140:21.0 141:163.0 142:6.0 143:664.0 144:232.0 145:182.0 146:238.0 147:4591.0 148:988.0 149:570.0 150:…						2654	3545	2263	5459	3361	2847	5568	4391	3823	3162	4035	4392	2790	4659	4846
4729	1071663	204	4729	85:11.0 86:24.0 87:247.0 89:464.0 90:3.0 97:142.0 98:56.0 99:80.0 101:277.0 102:6.0 103:1707.0 109:47.0 111:807.0 112:112.0 113:47.0 115:116.0 116:286.0 117:1034.0 119:131.0 127:59.0 129:2773.0 130:379.0 131:538.0 133:211.0 135:186.0 137:40.0 142:34.0 143:290.0 144:12.0 145:113.0 147:1979.0 148:185.0 149:228.0 151:8.0 154:57.0 155:214.0 157:424.0 158:19.0 159:303.0 160:34.0 162:58.0 163:132.0 164…						14050	11061	7853	13539	4309	8910	5765	9856	9795	2183	3435	12820	7189	5817	6975
4728	982938	332	4728	86:87.0 87:121.0 89:382.0 99:128.0 101:352.0 102:38.0 103:2871.0 104:117.0 109:168.0 113:238.0 114:76.0 115:46.0 117:2140.0 118:110.0 121:135.0 125:55.0 127:56.0 129:2432.0 130:323.0 131:148.0 133:408.0 135:9.0 139:90.0 141:155.0 142:144.0 143:662.0 144:78.0 145:91.0 147:6411.0 148:878.0 149:329.0 151:2.0 153:46.0 155:266.0 156:185.0 157:470.0 158:54.0 159:109.0 161:22.0 162:7.0 163:250.0 164:9.0…						10873	11369	11915	13168	11650	8603	7451	10172	12428	10509	5263	11283	7157	6683	7447
4723	455671	173	4723	85:618.0 86:843.0 87:547.0 88:603.0 89:8940.0 90:892.0 91:117.0 97:1.0 98:110.0 99:128.0 100:2383.0 101:1572.0 102:890.0 103:15425.0 104:1643.0 105:2833.0 106:145.0 110:184.0 112:87.0 113:255.0 114:2358.0 115:898.0 116:746.0 117:4842.0 118:672.0 119:802.0 126:95.0 127:72.0 128:1714.0 129:238.0 130:1131.0 131:1510.0 132:273.0 133:4482.0 134:765.0 135:175.0 140:473.0 142:1622.0 143:339.0 144:1766.0…						1191	1950	1974	3083	1141	509	1490	694	454	1581	496	1676	1038	697	857
4721	450619	173	4721	85:460.0 86:7.0 87:212.0 88:348.0 89:6445.0 90:526.0 91:101.0 98:87.0 99:213.0 100:1321.0 101:1379.0 102:404.0 103:14088.0 104:1313.0 105:1257.0 106:195.0 113:171.0 114:1098.0 115:467.0 116:619.0 117:4261.0 118:576.0 119:324.0 128:2360.0 129:568.0 130:1235.0 131:1978.0 132:165.0 133:4529.0 134:593.0 135:112.0 140:66.0 142:1833.0 143:278.0 144:1918.0 145:211.0 146:96.0 147:7446.0 148:744.0 149:697…						2207	3148	3971	3906	1357	1731	678	3382	3437	2335	1508	3036	2098	1844	1877
4716	815363	204	4716	85:77.0 86:140.0 89:384.0 96:17.0 98:73.0 99:66.0 101:781.0 103:4022.0 104:306.0 105:187.0 107:21.0 110:6.0 113:135.0 116:107.0 117:1203.0 122:64.0 123:16.0 124:2.0 125:11.0 127:4.0 128:52.0 129:1442.0 131:555.0 133:504.0 140:58.0 141:26.0 142:251.0 143:284.0 145:34.0 146:22.0 147:4740.0 148:464.0 149:308.0 152:6.0 153:27.0 154:57.0 155:99.0 156:439.0 157:121.0 158:103.0 159:618.0 160:204.0 161:2…	440053	C03584	FACUYWPMDKTVFU-BYPYZUCNSA-N			12096	6535	8307	10748	9267	32211	7717	6701	7583	8199	8458	4858	5240	6000	6628
4546	782748	217	4546	85:516.0 86:210.0 87:308.0 88:44.0 89:1357.0 90:38.0 91:106.0 93:119.0 94:129.0 95:198.0 96:257.0 97:215.0 98:257.0 99:309.0 100:249.0 101:440.0 102:198.0 103:5226.0 104:520.0 105:217.0 106:26.0 108:192.0 109:173.0 110:205.0 111:646.0 112:122.0 113:320.0 114:219.0 115:46.0 116:409.0 117:3287.0 118:315.0 119:98.0 121:32.0 122:11.0 123:162.0 124:44.0 125:81.0 128:170.0 129:2126.0 130:307.0 131:469.…						2032	2184	1396	2764	1677	2378	1211	1723	2235	725	788	2810	1628	1838	1180
4265	1024431	85	4265	85:2285.0 86:129.0 95:5.0 96:69.0 97:419.0 98:213.0 99:768.0 100:63.0 102:24.0 107:11.0 110:64.0 111:209.0 112:104.0 113:430.0 114:45.0 124:69.0 125:111.0 127:123.0 128:28.0 130:28.0 133:111.0 135:42.0 138:21.0 139:10.0 140:40.0 141:221.0 145:21.0 153:34.0 154:11.0 155:114.0 159:24.0 161:11.0 163:7.0 165:24.0 167:12.0 169:92.0 170:26.0 171:1.0 177:22.0 182:51.0 183:90.0 186:6.0 187:19.0 189:4.0 1…						17684	53520	24440	39680	7927	13889	4312	5730	30748	19456	7121	8132	30890	15196	16290
3781	948550	191	3781	85:356.0 86:409.0 88:341.0 89:959.0 90:10.0 91:31.0 96:405.0 97:374.0 99:81.0 100:623.0 101:580.0 102:248.0 103:4375.0 104:371.0 105:876.0 107:308.0 109:273.0 110:265.0 111:226.0 113:198.0 114:142.0 115:84.0 116:282.0 117:1524.0 118:156.0 119:86.0 120:64.0 125:47.0 126:222.0 127:532.0 128:116.0 129:4207.0 130:718.0 131:878.0 132:61.0 133:1384.0 134:281.0 135:335.0 136:124.0 139:95.0 140:38.0 141:…						9841	11434	5681	12627	11265	3385	8167	5775	11247	5951	6185	9781	8820	3692	2907
3465	564741	129	3465	85:191.0 86:277.0 87:66.0 89:3069.0 90:210.0 91:208.0 95:151.0 97:32.0 98:102.0 99:150.0 100:1462.0 101:1363.0 102:883.0 103:999.0 104:50.0 106:14.0 109:94.0 110:98.0 112:151.0 113:451.0 114:547.0 115:457.0 116:591.0 117:498.0 118:74.0 119:98.0 124:3.0 127:418.0 128:1219.0 129:8112.0 130:891.0 131:802.0 132:122.0 133:1064.0 134:80.0 139:161.0 140:61.0 141:26.0 142:715.0 143:293.0 144:710.0 145:98…						33166	8405	32901	26446	28422	12917	18742	26533	17795	14457	13134	22831	23586	18595	18607
3294	922565	259	3294	85:216.0 86:13.0 87:303.0 88:185.0 89:608.0 90:142.0 91:467.0 92:10.0 93:282.0 94:32.0 95:61.0 96:170.0 97:3376.0 98:142.0 99:335.0 100:51.0 101:2026.0 102:492.0 103:10206.0 104:917.0 105:888.0 106:155.0 107:748.0 108:149.0 109:183.0 110:41.0 111:188.0 112:48.0 113:280.0 114:129.0 115:2249.0 116:1031.0 117:1693.0 118:105.0 119:492.0 120:70.0 121:101.0 123:35.0 124:1.0 126:85.0 127:1164.0 128:192.…						5812	6518	3146	6759	5970	5704	4651	6140	5488	6192	4273	5603	5767	4887	4976
3247	979460	160	3247	89:475.0 99:30.0 100:75.0 101:176.0 102:3.0 103:1711.0 104:76.0 105:97.0 107:70.0 113:96.0 114:40.0 116:178.0 117:836.0 128:28.0 129:2250.0 130:245.0 131:294.0 132:3.0 133:486.0 141:10.0 142:63.0 143:227.0 145:40.0 147:2058.0 148:360.0 149:245.0 151:16.0 155:252.0 156:8.0 157:255.0 158:44.0 160:1119.0 161:382.0 162:81.0 163:110.0 165:51.0 169:1309.0 170:95.0 171:105.0 172:16.0 173:14.0 177:77.0 1…						110315	159549	158820	113492	74356	50832	105249	89544	84960	91874	91135	112116	51377	44255	47136
3206	1000105	129	3206	85:91.0 95:17.0 97:22.0 99:73.0 101:325.0 103:2605.0 104:170.0 105:28.0 109:197.0 111:58.0 112:12.0 113:82.0 114:15.0 115:17.0 116:261.0 117:503.0 119:37.0 129:3763.0 130:280.0 131:453.0 132:205.0 133:793.0 134:160.0 135:115.0 140:7.0 141:15.0 142:150.0 143:690.0 144:82.0 145:182.0 147:3286.0 148:315.0 149:435.0 151:44.0 153:7.0 154:132.0 155:217.0 156:54.0 157:298.0 158:37.0 161:52.0 163:119.0 1…						12476	14219	15423	22317	10740	14967	4641	14027	16203	18312	7658	19025	11883	9874	11321
3182	864701	204	3182	85:60.0 88:2.0 89:101.0 90:26.0 91:76.0 92:14.0 99:38.0 101:601.0 103:1037.0 104:1.0 108:28.0 109:44.0 110:154.0 111:36.0 113:21.0 115:98.0 116:308.0 117:1222.0 118:58.0 122:5.0 126:26.0 127:8.0 129:1248.0 131:179.0 133:352.0 134:265.0 139:2.0 141:3.0 142:41.0 143:353.0 144:29.0 147:2041.0 148:334.0 149:300.0 152:18.0 155:86.0 157:221.0 158:59.0 167:7.0 168:5.0 169:341.0 170:70.0 171:53.0 172:45.…						15685	13180	15423	14485	16440	13714	8401	5668	9994	10830	9335	12561	16496	951	2960
3178	880639	204	3178	85:127.0 89:42.0 92:78.0 94:11.0 95:12.0 98:18.0 99:101.0 101:1368.0 103:2198.0 104:116.0 109:14.0 110:113.0 111:20.0 112:13.0 113:105.0 115:257.0 116:846.0 117:1718.0 118:158.0 119:77.0 121:11.0 126:8.0 129:3639.0 130:428.0 131:1598.0 132:153.0 133:834.0 134:105.0 139:58.0 141:25.0 142:20.0 143:1284.0 144:162.0 145:159.0 147:3476.0 148:391.0 149:559.0 150:4.0 151:31.0 152:38.0 153:23.0 154:8.0 1…						14095	13598	13855	19353	12601	14621	5812	16082	11199	15463	11291	22500	9474	6517	9610
3175	911595	204	3175	85:82.0 86:46.0 87:92.0 89:163.0 95:31.0 96:47.0 99:56.0 101:1737.0 102:33.0 103:9231.0 104:719.0 105:137.0 106:64.0 107:20.0 109:58.0 113:318.0 114:5.0 115:265.0 116:1240.0 117:2291.0 118:224.0 119:183.0 121:14.0 125:9.0 129:3854.0 130:109.0 131:654.0 132:92.0 133:1259.0 139:7.0 141:43.0 142:38.0 143:824.0 144:34.0 145:168.0 147:4731.0 148:846.0 149:693.0 150:3.0 153:60.0 155:351.0 156:1.0 157:5…						20047	20743	10864	18083	9552	6264	4931	18684	8948	10515	7758	17166	19467	8351	4832
3173	517075	217	3173	85:84.0 86:33.0 88:82.0 89:182.0 97:32.0 98:150.0 99:653.0 100:70.0 101:227.0 102:112.0 103:1042.0 107:169.0 109:3.0 110:25.0 111:132.0 112:215.0 113:129.0 115:122.0 116:262.0 117:541.0 118:119.0 127:152.0 128:22.0 129:2292.0 130:601.0 131:298.0 133:684.0 134:4.0 135:31.0 143:886.0 144:57.0 147:1664.0 149:278.0 155:65.0 184:60.0 189:74.0 190:46.0 191:22.0 199:18.0 203:26.0 204:63.0 205:5.0 217:98…						3691	4309	3015	4457	4571	6019	3374	5365	5186	4841	3875	3017	7103	9234	9173
3166	751740	204	3166	85:497.0 86:100.0 87:498.0 88:44.0 89:413.0 97:4.0 99:264.0 100:100.0 101:1188.0 102:125.0 103:4779.0 104:332.0 105:84.0 109:93.0 111:191.0 113:217.0 115:843.0 116:698.0 117:3439.0 118:270.0 119:132.0 127:12.0 129:4175.0 130:1042.0 131:6631.0 132:1100.0 133:2506.0 134:640.0 135:171.0 139:8.0 141:49.0 142:80.0 143:1009.0 144:26.0 145:322.0 147:8106.0 148:1542.0 149:961.0 150:54.0 151:52.0 152:5.0 …						3788	4029	5535	4918	4417	3875	2404	5356	3690	2748	2017	4835	3024	3301	2242
3161	756161	204	3161	85:7877.0 86:1956.0 87:12708.0 88:4005.0 89:22913.0 90:2366.0 91:1622.0 92:351.0 93:277.0 94:699.0 95:1464.0 96:351.0 97:3427.0 98:1243.0 99:9190.0 100:1529.0 101:39623.0 102:6960.0 103:113537.0 104:11023.0 105:7035.0 106:377.0 107:68.0 108:234.0 109:4309.0 110:217.0 111:6158.0 112:875.0 113:10413.0 114:2040.0 115:22221.0 116:18861.0 117:131355.0 118:14132.0 119:12625.0 120:1067.0 121:793.0 122:2…						15958	4948	5535	19467	19081	17623	10810	5697	4557	13327	11404	19983	38775	10638	32773
3083	209514	85	3083	85:45584.0 86:3595.0 89:177.0 91:651.0 95:2372.0 96:1070.0 107:483.0 111:1958.0 120:87.0 133:712.0 140:45.0 150:39.0 154:239.0 159:155.0 161:75.0 163:143.0 164:36.0 165:101.0 174:99.0 176:39.0 177:202.0 179:12.0 185:31.0 189:191.0 191:775.0 192:318.0 193:291.0 203:31.0 207:6273.0 208:1199.0 209:728.0 210:117.0 211:10.0 215:26.0 222:49.0 223:16.0 229:46.0 231:41.0 240:33.0 241:13.0 243:16.0 247:99…						5042	7340	6679	8933	24979	28162	15864	7176	38086	4981	26009	115672	21031	23134	3351
2705	501579	217	2705	86:37.0 94:13.0 95:5.0 101:91.0 102:44.0 104:12.0 110:195.0 114:31.0 115:381.0 116:385.0 117:95.0 130:761.0 133:199.0 143:54.0 144:22.0 147:968.0 149:137.0 152:104.0 158:4.0 167:1.0 180:41.0 186:17.0 194:62.0 212:41.0 216:17.0 217:2942.0 218:559.0 219:137.0 228:14.0 232:98.0 235:9.0 246:2.0 253:57.0 257:58.0 268:73.0 269:1.0 271:8.0 283:7.0 300:33.0 305:3.0 313:5.0 314:9.0 324:11.0 351:1.0 362:10…						2912	3048	2942	3886	2331	3300	2428	3730	3320	3610	1651	3666	4685	4893	4471
2438	492298	245	2438	86:503.0 88:17.0 89:116.0 90:4.0 93:88.0 95:113.0 96:66.0 97:168.0 98:89.0 99:8.0 100:314.0 101:247.0 102:27.0 103:1128.0 104:51.0 107:91.0 110:29.0 111:25.0 112:33.0 113:187.0 114:59.0 115:108.0 116:201.0 125:16.0 127:112.0 128:62.0 129:1199.0 130:50.0 131:268.0 132:1.0 133:674.0 136:3.0 140:734.0 141:200.0 142:241.0 143:310.0 144:116.0 146:71.0 147:4685.0 148:901.0 149:165.0 153:27.0 154:7.0 15…						1136	986	1048	1469	1425	550	881	748	1198	1106	918	1368	1727	1502	1618
2403	424868	174	2403	85:166.0 86:217.0 89:1992.0 90:139.0 91:108.0 93:15.0 98:276.0 99:150.0 100:826.0 101:87.0 102:253.0 103:48.0 104:3.0 107:170.0 109:47.0 110:34.0 111:1.0 112:11.0 114:46.0 115:22.0 126:69.0 127:287.0 128:100.0 129:42.0 130:267.0 133:3.0 134:139.0 137:6.0 142:74.0 143:20.0 144:269.0 147:632.0 149:155.0 151:16.0 154:174.0 156:27.0 157:66.0 158:105.0 160:1.0 163:48.0 170:15.0 172:106.0 173:46.0 174:…						15902	12038	17919	12641	7815	12738	8889	14369	17915	17640	8631	17095	10102	10071	10577
2382	456585	174	2382	85:242.0 86:3169.0 87:240.0 88:246.0 89:41.0 93:197.0 95:77.0 98:13.0 99:40.0 100:1391.0 101:164.0 102:268.0 109:62.0 110:209.0 111:20.0 113:85.0 114:39.0 115:160.0 117:47.0 118:70.0 120:282.0 122:59.0 128:49.0 130:248.0 131:34.0 134:275.0 140:34.0 141:38.0 142:663.0 143:42.0 144:47.0 146:4.0 147:482.0 148:125.0 151:31.0 158:76.0 165:5.0 171:92.0 172:42.0 173:29.0 174:3878.0 175:660.0 176:305.0 1…						1916	2281	2458	2736	1522	1391	1511	2529	1766	2182	885	2929	1735	1724	1455
2193	594117	292	2193	86:163.0 87:325.0 88:467.0 89:590.0 90:91.0 91:66.0 92:32.0 94:47.0 97:15.0 99:117.0 101:1733.0 102:1159.0 103:10610.0 104:1025.0 105:396.0 107:19.0 108:1.0 113:94.0 114:145.0 115:70.0 116:1948.0 117:4605.0 118:638.0 119:478.0 120:66.0 122:13.0 126:81.0 129:1036.0 130:1051.0 131:1101.0 132:82.0 133:1631.0 134:272.0 135:101.0 137:14.0 139:22.0 141:162.0 142:194.0 143:1146.0 144:188.0 145:203.0 146…						5455	7450	6726	7548	5875	6642	4682	7511	6554	7092	3358	7042	12055	11861	12211
2042	833664	174	2042	85:73.0 86:920.0 87:24.0 95:195.0 98:32.0 100:490.0 101:74.0 102:199.0 108:10.0 109:32.0 110:10.0 111:33.0 112:3.0 114:35.0 116:8.0 117:72.0 123:3.0 124:9.0 129:13.0 130:116.0 146:49.0 148:234.0 154:6.0 156:355.0 158:217.0 159:11.0 160:20.0 173:10.0 174:4502.0 175:677.0 176:303.0 188:8.0 202:53.0 203:26.0 204:78.0 217:15.0 222:62.0 238:91.0 239:22.0 240:78.0 259:1.0 274:9.0 308:9.0 327:13.0 351:4…						1639	3162	3087	10525	2598	4135	1637	2565	7632	6280	1108	6897	4730	3142	2847
2023	774838	160	2023	85:119.0 86:399.0 88:33.0 96:21.0 98:95.0 99:67.0 100:381.0 101:286.0 102:60.0 112:107.0 115:14.0 116:282.0 117:478.0 124:8.0 126:68.0 128:159.0 129:9.0 130:842.0 131:31.0 132:56.0 134:2.0 140:18.0 142:104.0 144:291.0 146:240.0 152:15.0 153:21.0 154:43.0 158:52.0 160:2161.0 161:203.0 162:20.0 168:46.0 172:252.0 174:556.0 175:30.0 176:21.0 184:21.0 188:17.0 190:6.0 191:11.0 194:7.0 200:327.0 201:3…						1005	1097	1252	1036	818	986	646	1086	1234	1248	3579	2061	959	6427	6262
1753	795138	290	1753	85:57.0 87:36.0 88:28.0 89:1090.0 90:99.0 98:114.0 99:108.0 101:508.0 103:2355.0 104:196.0 105:13.0 111:12.0 112:25.0 113:58.0 114:60.0 115:68.0 116:88.0 117:1377.0 118:71.0 119:5.0 125:1.0 126:244.0 128:69.0 129:1132.0 130:88.0 131:83.0 132:14.0 133:3844.0 134:419.0 135:90.0 139:2.0 140:34.0 141:11.0 142:98.0 143:170.0 144:67.0 145:62.0 146:63.0 147:5341.0 148:971.0 149:526.0 151:34.0 154:11.0 1…						29197	23947	35169	24154	33248	23732	13879	26841	10070	11818	5538	12524	26352	20348	21361
1704	505341	223	1704	85:698.0 86:242.0 89:124.0 91:1848.0 92:177.0 93:1276.0 94:67.0 95:381.0 97:527.0 98:76.0 99:130.0 100:77.0 101:280.0 103:1026.0 104:52.0 105:1859.0 106:69.0 107:989.0 109:695.0 110:242.0 111:90.0 112:36.0 113:121.0 114:24.0 115:803.0 116:104.0 117:8561.0 118:921.0 119:1118.0 121:401.0 122:41.0 123:1164.0 124:161.0 125:789.0 127:97.0 128:110.0 130:619.0 131:1895.0 132:82.0 133:3913.0 134:621.0 13…						1028	389	1335	1893	2544	1299	908	1998	909	575	864	1503	648	917	864
1690	525027	204	1690	85:267.0 86:1.0 87:177.0 88:58.0 89:186.0 97:253.0 98:20.0 99:116.0 100:88.0 101:1989.0 102:67.0 103:1777.0 104:23.0 105:156.0 107:168.0 111:25.0 112:33.0 113:166.0 115:229.0 116:1289.0 117:1250.0 118:151.0 119:87.0 127:27.0 128:12.0 129:2427.0 130:123.0 131:1303.0 132:131.0 133:2316.0 134:16.0 140:71.0 141:150.0 142:54.0 143:1014.0 144:55.0 145:12.0 147:9915.0 148:1531.0 149:1494.0 151:26.0 156:…						555	933	522	1119	930	1393	1310	598	608	2408	1808	2369	1538	2297	2544
1684	743774	262	1684	85:4327.0 86:2186.0 87:3461.0 88:2118.0 89:32761.0 90:2625.0 91:1533.0 92:170.0 93:407.0 94:368.0 95:624.0 96:729.0 97:2507.0 98:1747.0 99:1982.0 100:6529.0 101:7703.0 102:2830.0 103:88682.0 104:8750.0 105:10214.0 106:883.0 107:193.0 108:349.0 109:388.0 110:1104.0 111:1111.0 112:417.0 113:2639.0 114:28715.0 115:5538.0 116:5143.0 117:46121.0 118:4935.0 119:5857.0 120:563.0 121:271.0 122:71.0 123:1…						705	1213	1270	720	1010	472	1246	1192	886	1052	474	1233	628	710	483
1675	782253	357	1675	85:388.0 87:49.0 88:217.0 89:596.0 90:306.0 91:2392.0 92:277.0 94:182.0 95:516.0 99:391.0 101:82.0 102:288.0 103:1101.0 104:290.0 105:1055.0 106:30.0 107:19.0 109:251.0 111:68.0 112:29.0 113:80.0 114:1.0 115:1906.0 117:77.0 119:742.0 120:251.0 121:502.0 122:33.0 123:214.0 126:167.0 127:119.0 128:239.0 129:6.0 131:389.0 133:972.0 134:908.0 135:2187.0 136:367.0 137:280.0 139:219.0 140:84.0 141:136.…						413	798	352	637	1781	1528	787	1435	8028	2259	1515	2141	6039	751	1538
137	246162	204	137	85:280.0 86:863.0 87:415.0 88:205.0 90:120.0 100:239.0 101:103.0 102:415.0 103:1190.0 105:99.0 106:155.0 107:58.0 111:67.0 115:161.0 117:977.0 118:268.0 131:1230.0 132:256.0 133:749.0 136:65.0 143:24.0 147:26816.0 148:4288.0 149:1504.0 150:101.0 155:33.0 160:86.0 175:26.0 180:26.0 184:362.0 188:78.0 190:187.0 191:61.0 194:26.0 195:32.0 200:35.0 202:28.0 204:4031.0 205:466.0 206:177.0 219:180.0 22…						7986	23049	16458	24733	11394	28525	12633	36605	75936	59700	42654	52358	18477	24228	27167

## Sheet: Run information
Analysis
MiniX:	686338
Client Name:	Noah Feinberg/Abhaya Dandekar
Matrix:	English walnut seed coat
Sample Number:	24
Method:	Primary Metabolism
Exraction Notes:
Parameters:
Instrument:	GCTOF - C
Resuspension Volume:	100 uL
Injection Volume:	0.5 uL
Start Date:	2022-09-26
Comments:
Data Processing:
Data Technician:	ZT
Comments:	Study normalized by the averaqge mTIC of the samples
Data Processing mx:	692613
