# Supplementary material for: Unveiling the “hidden quality” of the walnut pellicle: a precious source of bioactive lipids
Source: Front Plant Sci. 2024 Jun 18;15:1395543. doi: 10.3389/fpls.2024.1395543 (PMC11217525; doi:10.3389/fpls.2024.1395543)
Supplement: Supplementary Table 4 — Annotation of all metabolites detected and identified by the three analytical platforms. [file Table_4.xlsx]

## Sheet: Metabolites Annotations
Dataset	Global Position	Annotation	Secondary Name	InChI Key	PubChem	KEGG	SUPERPATHWAY(s)	SUBPATHWAY(s)	Biochemical Classification	Biochemical Subclassification	Group Label
Platform 2 (Polyphenols and fatty acids)	133	3-Methylbutyl 6-O-.alpha.-L-arabinopyranosyl-.beta.-D-glucopyranoside	NA	IJPILWLAYQFNOD-UQSUZELCSA-N	53494100	NA	Carbohydrates	Sugar Metabolism, Sugar (Mono- and di-saccharide) Metabolism, Primary Alcohol Metabolism, Alkane Metabolism, Alkanol Metabolism	Disaccharide, O-Glycoside	Alkyl Glycoside
Platform 2 (Polyphenols and fatty acids)	150	2-Methylbutyl 6-O-pentofuranosylhexopyranoside	NA	QGZWEFZSPCYRKL-UHFFFAOYSA-N	129008895	NA	Carbohydrates	Sugar Metabolism, Sugar (Mono- and di-saccharide) Metabolism, Primary Alcohol Metabolism, Alkane Metabolism, Alkanol Metabolism	Monosaccharide, O-Glycoside	Alkyl Glycoside
Platform 2 (Polyphenols and fatty acids)	127	3,4'-Dihydroxypropiophenone	3,4'-Dihydroxypropiophenone	LTEPZFZSPZASKJ-UHFFFAOYSA-N	638759	NA	Phenolics	Alkane Metabolism, Alkanol Metabolism	Alkylphenol	Alkyl-phenylketone
Platform 2 (Polyphenols and fatty acids)	140	3-(4-Hydroxyphenyl)-3-oxopropyl .beta.-D-glucopyranoside	NA	NPAQHLFPEOMKAL-UXXRCYHCSA-N	10471692	NA	Phenolics	Alkane Metabolism, Alkanol Metabolism, Sugar Metabolism, Sugar (Mono- and Di-saccharide) Metabolism	Alkylphenol, Simple Phenol, O-Glycoside	Alkyl-phenylketone, Phenolic Glycoside, Alkylphenol Glycoside
Platform 2 (Polyphenols and fatty acids)	190	1-(4-Hydroxyphenyl)propane-1,2-diol	p-hydroxyphenylpropylene glycol	PIYCCGIPUXJHIW-UHFFFAOYSA-N	75411975	NA	Phenolics	Phenol Metabolism	Simple Phenol	Alkylbenzene
Platform 3 (Primary Metabolites)	332	ethanolamine	Aminoethanol	HZAXFHJVJLSVMW-UHFFFAOYSA-N	700	C00189	Carbohydrates	Phospholipid Metabolism, Cell Membrane Metabolism, Bioactive Lipid (NAE & NAPE ) Metabolism	Biogenic Amine, Amine	Amino Alcohol, Ethanolamine
Platform 3 (Primary Metabolites)	276	N-acetylmannosamine	beta-ManNAc	OVRNDRQMDRJTHS-OZRXBMAMSA-N	11096158	C00645	Carbohydrates	Sugar Metabolism, Sugar (Mono- and di-saccharide) Metabolism, Amino and Nucleotide Sugar Metabolism	Monosaccharide	Amino Sugar
Platform 2 (Polyphenols and fatty acids)	41	N-(4-Ethylbenzyl)-N-methylamine	NA	JCSDSVXBTRWEJS-UHFFFAOYSA-N	2060575	NA	Phenolics	Aromatic (Non-phenolic) Compound Metabolism	Amine. Biogenic Amine, Aromatic Compound	Aromatic Amine, Monoamine
Platform 2 (Polyphenols and fatty acids)	38	N-Acetyltryptophan	N-Acetyl-DL-tryptophan	DZTHIGRZJZPRDV-UHFFFAOYSA-N	2002	C03137	Peptides & Amino Acids	Amino Acid Metabolism, Aromatic Amino Acid Metabolism, Tryptophan Metabolism	Simple Phenol, Amino Acid, Amine, Carboxylic Acid	Aromatic Amino Acid, Non-proteinogenic Amino Acid, Indolamine, Monocarboxylic Acid
Platform 2 (Polyphenols and fatty acids)	50	L-Tryptophan	Tryptophan	QIVBCDIJIAJPQS-SECBINFHSA-N	6305	C00078	Peptides & Amino Acids	Amino Acid Metabolism, Aromatic Amino Acid Metabolism, Non-Aromatic Amino Acid Metabolism, Tryptophan Metabolism, Alkaloid Metabolism, Phenylpropanoid Metabolism, Plant Hormone Metabolism, Cofactor Metabolism	Simple Phenol, Amino Acid, Amine, Carboxylic Acid	Aromatic Amino Acid, Proteinogenic Amino Acid, Indolamine, Monocarboxylic Acid
Platform 2 (Polyphenols and fatty acids)	49	L-Tyrosine	Tyrosine	OUYCCCASQSFEME-UHFFFAOYSA-N	1153	C00082	Peptides & Amino Acids	Tyrosine Metabolism, Aromatic Amino Acid Metabolism, Amino Acid Metabolism, Phenylpropanoid Metabolism, Alkaloid Metabolism, Glucosinolate Metabolism, Cofactor/Coenzyme Metabolism	Simple Phenol, Amino Acid, Amine, Carboxylic Acid	Aromatic Amino Acid, Proteinogenic Amino Acid, Monoamine, Monocarboxylic Acid
Platform 3 (Primary Metabolites)	233	tyrosine	L-tyrosine	OUYCCCASQSFEME-QMMMGPOBSA-N	6057	C00082	Peptides & Amino Acids	Tyrosine Metabolism, Aromatic Amino Acid Metabolism, Amino Acid Metabolism, Phenylpropanoid Metabolism, Alkaloid Metabolism, Glucosinolate Metabolism, Cofactor/Coenzyme Metabolism	Simple Phenol, Amino Acid, Amine, Carboxylic Acid	Aromatic Amino Acid, Proteinogenic Amino Acid, Monoamine, Monocarboxylic Acid
Platform 3 (Primary Metabolites)	306	hydroquinone	Benzene-1,4-diol	QIGBRXMKCJKVMJ-UHFFFAOYSA-N	785	C00530	Phenolics	Tyrosine Metabolism, Benzoate Metabolism, Aminobenzoate Metabolism	Simple Phenol	Benzendiol
Platform 3 (Primary Metabolites)	260	pyrogallol	Pyrogallic acid	WQGWDDDVZFFDIG-UHFFFAOYSA-N	1057	C01108	Phenolics	Aminobenzoate Metabolism, Gallic Acid Metabolism, Tannin Metabolism	Simple Phenol	Benzenetriol
Platform 2 (Polyphenols and fatty acids)	68	Epigallocatechin gallate	EGCG	WMBWREPUVVBILR-WIYYLYMNSA-N	65064	C09731	Phenolics	Flavonoid Metabolism, Gallic Acid Metabolism, Theaflavin Metabolism	Flavanol, Polyphenol, Phenolic Ester, Tannin	Catechin, Gallated Catechin, Phenolic Ester, Flavan-3-ol Ester
Platform 2 (Polyphenols and fatty acids)	69	Epicatechin gallate	ECG	LSHVYAFMTMFKBA-TZIWHRDSSA-N	107905	C22594	Phenolics	Flavonoid Metabolism, Gallic Acid Metabolism, Theaflavin Metabolism	Flavanol, Polyphenol, Phenolic Ester, Tannin	Catechin, Gallated Catechin, Phenolic Ester, Flavan-3-ol Ester
Platform 2 (Polyphenols and fatty acids)	108	7-Galloylcatechin	NA	WKIHBIBUCQPPBY-NQIIRXRSSA-N	26194291	NA	Phenolics	Flavonoid Metabolism, Gallic Acid Metabolism, Tannin Metabolism, Theaflavin Metabolism	Flavanol, Polyphenol, Phenolic Ester, Tannin	Catechin, Gallated Catechin, Phenolic Ester, Flavan-3-ol Ester
Platform 3 (Primary Metabolites)	368	3,4-dihydroxyphenylacetic acid	Homoprotocatechuate	CFFZDZCDUFSOFZ-UHFFFAOYSA-N	547	C01161	Phenolics	Amino Acid Metabolism, Aromatic Amino Acid Metabolism, Tyrosine Metabolism, Flavonoid Metabolism	Simple Phenol, Carboxylic Acid, Phenolic Acid	Catechol, Monocarboxylic Acid
Platform 2 (Polyphenols and fatty acids)	129	3,4,2',4',6'-Pentahydroxychalcone	Eriodictyol chalcone	CRBYNQCDRNZCNX-DUXPYHPUSA-N	5461154	C15525	Phenolics	Flavonoid Metabolism	Chalcone/Dihydrochalcone, Polyphenol	Chalcone
Platform 2 (Polyphenols and fatty acids)	25	Phlorizin	Dihydronaringenin	IOUVKUPGCMBWBT-QNDFHXLGSA-N	6072	C01604	Phenolics	Flavonoid Metabolism, Sugar Metabolism, Sugar (Mono- and Di-saccharide Metabolism)	Chalcone/Dihydrochalcone, Polyphenol, O-Glycoside	Chalcone Glycoside, Phenolic Glycoside
Platform 2 (Polyphenols and fatty acids)	32	Naringin dihydrochalcone	NA	CWBZAESOUBENAP-QVNVHUMTSA-N	9894584	NA	Phenolics	Flavonoid Metabolism, Sugar Metabolism, Sugar (Mono- and Di-saccharide Metabolism)	Chalcone/Dihydrochalcone, Polyphenol, O-Glycoside	Chalcone Glycoside, Phenolic Glycoside
Platform 2 (Polyphenols and fatty acids)	12	Soyacerebroside II	2-hydroxy-N-[(4E,8Z)-3-hydroxy-1-[(2R,3R,4S,5S,6R)-3,4,5-trihydroxy-6-(hydroxymethyl)oxan-2-yl]oxyoctadeca-4,8-dien-2-yl]hexadecanamide	HOMYIYLRRDTKAA-DNZXWUPJSA-N	15599558	NA	Lipids	Sphingolipid Metabolism	Sphingolipid	Complex Sphingolipid (Sphingomyelins & Glycosphingolipids) (L1), Cerebroside (L2)	Sphingolipids
Platform 1 (Lipids)	428	GlcCer d38:1	beta-D-glucosyl-N-eicosanoylsphingosine	DFELABABMXOKTD-IYFIADHGSA-N	20057356	NA	Lipids	Sphingolipid Metabolism	Sphingolipid	Complex Sphingolipid (Sphingomyelins & Glycosphingolipids) (L1), Glycosphingolipid (L2), Cerebroside (L3)	Sphingolipids
Platform 1 (Lipids)	429	GlcCer d40:1	N-(docosanoyl)-1-beta-glucosyl-sphing-4-enine	YIGARKIIFOHVPF-YAEABVQUSA-N	6321359	NA	Lipids	Sphingolipid Metabolism	Sphingolipid	Complex Sphingolipid (Sphingomyelins & Glycosphingolipids) (L1), Glycosphingolipid (L2), Cerebroside (L3)	Sphingolipids
Platform 1 (Lipids)	430	GlcCer d41:1	N-(tricosanoyl)-1-beta-glucosyl-sphing-4-enine	SJGWLQDELUWRDA-MUYAOIFFSA-N	52931253	NA	Lipids	Sphingolipid Metabolism	Sphingolipid	Complex Sphingolipid (Sphingomyelins & Glycosphingolipids) (L1), Glycosphingolipid (L2), Cerebroside (L3)	Sphingolipids
Platform 1 (Lipids)	431	GlcCer d42:1	N-(tetracosanoyl)-1-beta-glucosyl-sphing-4-enine	POQRWMRXUOPCLD-AAAFHMTMSA-N	6321361	NA	Lipids	Sphingolipid Metabolism	Sphingolipid	Complex Sphingolipid (Sphingomyelins & Glycosphingolipids) (L1), Glycosphingolipid (L2), Cerebroside (L3)	Sphingolipids
Platform 1 (Lipids)	432	HexCer 34:2;3O|HexCer 18:2;2O/16:0;O	Glucosylceramide	HOMYIYLRRDTKAA-UHFFFAOYSA-N	73156994	C01190	Lipids	Sphingolipid Metabolism	Sphingolipid	Complex Sphingolipid (Sphingomyelins & Glycosphingolipids) (L1), Glycosphingolipid (L2), Cerebroside (L3)	Sphingolipids
Platform 1 (Lipids)	433	HexCer 41:1;4O|HexCer 18:1;3O/23:0;(2OH)	NA	GXXYAXHZBGPQTG-UHFFFAOYSA-N	72764918	NA	Lipids	Sphingolipid Metabolism	Sphingolipid	Complex Sphingolipid (Sphingomyelins & Glycosphingolipids) (L1), Glycosphingolipid (L2), Cerebroside (L3)	Sphingolipids
Platform 1 (Lipids)	434	HexCer 42:1;4O|HexCer 18:1;3O/24:0;(2OH)	Momor-cerebroside I	QZNIVVAKPLIDJX-UHFFFAOYSA-N	75014953	NA	Lipids	Sphingolipid Metabolism	Sphingolipid	Complex Sphingolipid (Sphingomyelins & Glycosphingolipids) (L1), Glycosphingolipid (L2), Cerebroside (L3)	Sphingolipids
Platform 1 (Lipids)	435	HexCer 43:1;4O|HexCer 18:1;3O/25:0;(2OH)	NA	JPDBHJZMCPAOTJ-UHFFFAOYSA-N	72795542	NA	Lipids	Sphingolipid Metabolism	Sphingolipid	Complex Sphingolipid (Sphingomyelins & Glycosphingolipids) (L1), Glycosphingolipid (L2), Cerebroside (L3)	Sphingolipids
Platform 1 (Lipids)	482	SM d30:1	N-lauroyl-D-erythro-sphingosylphosphorylcholine	HZCLJRFPXMKWHR-FEBLJDHQSA-N	44260123	NA	Lipids	Sphingolipid Metabolism, Cell Membrane Metabolism	Sphingolipid	Complex Sphingolipid (Sphingomyelins & Glycosphingolipids) (L1), Sphingomyelin (L2)	Sphingolipids
Platform 2 (Polyphenols and fatty acids)	112	5-[(1E,3E)-Hepta-1,3-dienyl]-2,3-dihydroxycyclopentane-1-carboxylic acid	NA	QNHUKXZHEMSPPA-YTXTXJHMSA-N	23986026	NA	Lipids	Free Fatty Acid Metabolism, Unsaturated Fatty Acid (UFA) Metabolism	Fatty Acids & Acyls	Cyclic Fatty Acid (L1)	Free Fatty Acids (FFAs)
Platform 3 (Primary Metabolites)	259	quinic acid	Quinate	AAWZDTNXLSGCEK-LNVDRNJUSA-N	6508	C00296	Phenolics	Shikimate Metabolism, Amino Acid Metabolism, Aromatic Amino Acid Metabolism	Carboxylic Acid	Cyclohexanecarboxylic Acid, Monocarboxylic Acid, Cyclitol
Platform 2 (Polyphenols and fatty acids)	80	D-Saccharic acid 1,4-lactone	D-Glucaro-1,4-lactone	XECPAIJNBXCOBO-MMPJQOAZSA-N	122306	C21095	Carbohydrates	Sugar Metabolism, Sugar (Mono- and di-saccharide) Metabolism, Sugar Acid Metabolism	Lactone	Delta-Lactone
Platform 3 (Primary Metabolites)	240	thymidine	Deoxythymidine	IQFYYKKMVGJFEH-XLPZGREQSA-N	5789	C00214	Nucleic Acids	Nucleotide and Nucleoside Metabolism, Pyrimidine Metabolism	Pyrimidine, Nucleoside, Glycosamine	Deoxyribonucleoside, Pyrimidine Deoxyribonucleoside
Platform 3 (Primary Metabolites)	373	2-deoxyuridine	Deoxyuridine	MXHRCPNRJAMMIM-SHYZEUOFSA-N	13712	C00526	Nucleic Acids	Nucleotide and Nucleoside Metabolism, Pyrimidine Metabolism	Pyrimidine, Nucleoside, Glycosamine	Deoxyribonucleoside, Pyrimidine Deoxyribonucleoside
Platform 1 (Lipids)	410	DGGA 34:2|DGGA 16:0_18:2	NA	BUAACCTZRHRKAS-UHFFFAOYSA-N	NA	NA	Lipids	Glyceride Metabolism	Glycerolipid	Diacylglycerol (DG) (L1), Diacylglycerol glucuronide (DGGA) (L2)	Glycerolipids
Platform 1 (Lipids)	411	DGGA 36:3|DGGA 18:1_18:2	NA	VBTJCNBNATWYNG-UHFFFAOYSA-N	NA	NA	Lipids	Glyceride Metabolism	Glycerolipid	Diacylglycerol (DG) (L1), Diacylglycerol glucuronide (DGGA) (L2)	Glycerolipids
Platform 1 (Lipids)	408	DGDG 34:2|DGDG 16:0_18:2	[1-Hexadecanoyloxy-3-[3,4,5-trihydroxy-6-[[3,4,5-trihydroxy-6-(hydroxymethyl)oxan-2-yl]oxymethyl]oxan-2-yl]oxypropan-2-yl] octadeca-9,12-dienoate	QZXMUPATKGLZAP-UHFFFAOYSA-N	25203017	NA	Lipids	Glyceride Metabolism, Plastid Membrane Metabolism	Glycerolipid	Diacylglycerol (DG) (L1), Digalactosyldiacylglycerol (DGDG) (L2)	Glycerolipids
Platform 1 (Lipids)	409	DGDG 36:3|DGDG 18:1_18:2	NA	KCWRXTZCUNBOLH-UHFFFAOYSA-N	NA	NA	Lipids	Glyceride Metabolism, Plastid Membrane Metabolism	Glycerolipid	Diacylglycerol (DG) (L1), Digalactosyldiacylglycerol (DGDG) (L2)	Glycerolipids
Platform 1 (Lipids)	400	DG 34:1	1-Palmitoyl-2-oleoyl-sn-glycerol	YEJYLHKQOBOSCP-OZKTZCCCSA-N	5282283	NA	Lipids	Glyceride Metabolism	Glycerolipid	Diacylglycerol (DG) (L1), Unsaturated Diacylglycerol (U-DG) (L2)	Glycerolipids
Platform 1 (Lipids)	401	DG 34:2	1-palmitoyl-2-linoleoyl-sn-glycerol	SVXWJFFKLMLOHO-YAIZGCQRSA-N	9543695	NA	Lipids	Glyceride Metabolism	Glycerolipid	Diacylglycerol (DG) (L1), Unsaturated Diacylglycerol (U-DG) (L2)	Glycerolipids
Platform 1 (Lipids)	402	DG 34:3	1-palmitoleoyl-2-linoleoyl-sn-glycerol	BHGPPCIWDXQOMA-IXDOJJAKSA-N	9543699	NA	Lipids	Glyceride Metabolism	Glycerolipid	Diacylglycerol (DG) (L1), Unsaturated Diacylglycerol (U-DG) (L2)	Glycerolipids
Platform 1 (Lipids)	403	DG 36:2	1,2-Dioleoyl-sn-glycerol	AFSHUZFNMVJNKX-LLWMBOQKSA-N	9543716	NA	Lipids	Glyceride Metabolism	Glycerolipid	Diacylglycerol (DG) (L1), Unsaturated Diacylglycerol (U-DG) (L2)	Glycerolipids
Platform 1 (Lipids)	404	DG 36:3	1-oleoyl-2-linoleoyl-sn-glycerol	BLZVZPYMHLXLHG-JOBMVARSSA-N	9543722	NA	Lipids	Glyceride Metabolism	Glycerolipid	Diacylglycerol (DG) (L1), Unsaturated Diacylglycerol (U-DG) (L2)	Glycerolipids
Platform 1 (Lipids)	405	DG 36:4 Isomer A	1,2-Dilinoleoyl-sn-glycerol	MQGBAQLIFKSMEM-ZHARMHCNSA-N	9543729	NA	Lipids	Glyceride Metabolism	Glycerolipid	Diacylglycerol (DG) (L1), Unsaturated Diacylglycerol (U-DG) (L2)	Glycerolipids
Platform 1 (Lipids)	406	DG 36:5	NA	ITGCIESKDJEEHN-UHFFFAOYSA-N	53477995	NA	Lipids	Glyceride Metabolism	Glycerolipid	Diacylglycerol (DG) (L1), Unsaturated Diacylglycerol (U-DG) (L2)	Glycerolipids
Platform 1 (Lipids)	407	DG 36:5|DG 18:2_18:3	(3-Hydroxy-2-octadeca-9,12,15-trienoyloxypropyl) octadeca-9,12-dienoate	PGXBELQFNRPKBC-UHFFFAOYSA-N	85034078	NA	Lipids	Glyceride Metabolism	Glycerolipid	Diacylglycerol (DG) (L1), Unsaturated Diacylglycerol (U-DG) (L2)	Glycerolipids
Platform 2 (Polyphenols and fatty acids)	179	1,2-Dilinoleoylglycerol	Glyceryl dilinoleate	MQGBAQLIFKSMEM-MAZCIEHSSA-N	6438297	NA	Lipids	Glyceride Metabolism	Glycerolipid	Diacylglycerol (DG) (L1), Unsaturated Diacylglycerol (U-DG) (L2)	Glycerolipids
Platform 3 (Primary Metabolites)	229	urea	Carbamide	XSQUKJJJFZCRTK-UHFFFAOYSA-N	1176	C00086	Nucleic Acids	Nitrogen Metabolism, Urea Cycle, Purine Metabolism, Pyrimidine Metabolism, Amino Acid Metabolism, Non-Aromatic Amino Acid Metabolism	Amide	Diamide
Platform 2 (Polyphenols and fatty acids)	39	N-Acetyl-L-glutamine	Aceglutamide	KSMRODHGGIIXDV-YFKPBYRVSA-N	182230	NA	Peptides & Amino Acids	Amino Acid Metabolism, Non-Aromatic Amino Acid Metabolism, Nitrogen Metabolism	Amide, Carboxylic Acid	Diamide, Monocarboxylic Acid
Platform 2 (Polyphenols and fatty acids)	169	1,5-Pentanediamine	Cadaverine	VHRGRCVQAFMJIZ-UHFFFAOYSA-N	273	C01672	Alkaloids	Amino Acid Metabolism, Non-Aromatic Amino Acid Metabolism, Glutathione Metabolism, Alkaloid Metabolism	Amine, Biogenic Amine, Alkaloid, Polyamine Alkaloid	Diamine Alkaloid, Diamine
Platform 3 (Primary Metabolites)	243	terephthalic acid	Terephthalate	KKEYFWRCBNTPAC-UHFFFAOYSA-N	22416364	C06337	Phenolics	Aminobenzoate Metabolism, Polycyclic Aromatic Hydrocarbon Metabolism	Simple Phenol, Phenolic Acid, Carboxylic Acid	Dicarboxylic Acid
Platform 3 (Primary Metabolites)	372	2-ketoadipic acid	Oxoadipic acid	FGSBNBBHOZHUBO-UHFFFAOYSA-N	71	C00322	Peptides & Amino Acids	Amino Acid Metabolism, Non-Aromatic Amino Acid Metabolism, Aromatic Amino Acid Metabolism	Organic Acid, Fatty Acid, Carboxylic Acid	Dicarboxylic Acid, Medium-chain Fatty Acid (MCFA), Dicarboxylic Fatty Acid (DC-FA), Dicarboxylic Medium-chain Fatty Acid (MC-SCFA), Saturated Fatty Acid (SFA)
Platform 3 (Primary Metabolites)	254	saccharic acid	Glucaric acid	DSLZVSRJTYRBFB-LLEIAEIESA-N	33037	C00818	Carbohydrates	Sugar Metabolism, Sugar (Mono- and di-saccharide) Metabolism, Sugar Acid Metabolism, Ascorbate and Aldarate Metabolism, Amino and Nucleotide Sugar Metabolism	Sugar Acid, Organic Acid, Carboxylic Acid, Fatty Acid	Dicarboxylic Acid, Medium-chain Fatty Acid (MCFA), Dicarboxylic Fatty Acid (DC-FA), Dicarboxylic Medium-chain Fatty Acid (MC-SCFA), Sugar Acid, C6 Sugar Acid
Platform 3 (Primary Metabolites)	248	succinic acid	Succinate	KDYFGRWQOYBRFD-UHFFFAOYSA-N	1110	C00042	Carbohydrates	Sugar Metabolism, TCA Cycle, Ascorbate and Aldarate Metabolism, Amino Acid Metabolism, Non-aromatic Amino Acid Metabolism, Aromatic Amino Acid Metabolism, Pyruvate Metabolism, Glyoxylate Metabolism, Butanoate Metabolism, Phenylpropanoid Metabolism, Alkaloid Metabolism, Hormone Metabolism, Cofactor/Coenzyme Metabolism, Propanoate Metabolism, Nicotinate and Nicotinamide Metabolism	Organic Acid, Carboxylic Acid, Fatty Acid	Dicarboxylic Acid, Short-chain Fatty Acid (SCFA), Dicarboxylic Fatty Acid (DC-FA), Dicarboxylic Short-chain Fatty Acid (DC-SCFA)
Platform 3 (Primary Metabolites)	315	glutaric acid	Glutarate	JFCQEDHGNNZCLN-UHFFFAOYSA-N	743	C00489	Peptides & Amino Acids	Amino Acid Metabolism, Non-Aromatic Amino Acid Metabolism, Aromatic Amino Acid Metabolism, Dicarboxylic Acid Metabolism	Organic Acid, Carboxylic Acid, Fatty Acid	Dicarboxylic Acid, Short-chain Fatty Acid (SCFA), Dicarboxylic Fatty Acid (DC-FA), Dicarboxylic Short-chain Fatty Acid (DC-SCFA)
Platform 3 (Primary Metabolites)	327	fumaric acid	Fumarate	VZCYOOQTPOCHFL-OWOJBTEDSA-N	444972	C00122	Carbohydrates	Sugar Metabolism, TCA Cycle, Amino Acid Metabolism, Non-aromatic Amino Acid Metabolism, Aromatic Amino Acid Metabolism, Pyruvate Metabolism, Butanoate Metabolism, Phenylpropanoid Metabolism, Alkaloid Metabolism, Hormone Metabolism, Nicotinate and Nicotinamide Metabolism, Polyketide Metabolism	Organic Acid, Carboxylic Acid, Fatty Acid	Dicarboxylic Acid, Short-chain Fatty Acid (SCFA), Dicarboxylic Fatty Acid (DC-FA), Dicarboxylic Short-chain Fatty Acid (DC-SCFA)
Platform 3 (Primary Metabolites)	354	alpha-ketoglutarate	Oxoglutaric acid	KPGXRSRHYNQIFN-UHFFFAOYSA-N	51	C00026	Carbohydrates	TCA Cycle, Ascorbate and Aldarate Metabolism, Amino Acid Metabolism, Non-aromatic Amino Acid Metabolism, Glyoxylate Metabolism, Butanoate Metabolism, Phenylpropanoid Metabolism, Alkaloid Metabolism, Hormone Metabolism, Cofactor/Coenzyme Metabolism	Organic Acid, Carboxylic Acid, Fatty Acid	Dicarboxylic Acid, Short-chain Fatty Acid (SCFA), Dicarboxylic Fatty Acid (DC-FA), Dicarboxylic Short-chain Fatty Acid (DC-SCFA), Keto Acid
Platform 3 (Primary Metabolites)	285	malic acid	Malate	BJEPYKJPYRNKOW-UHFFFAOYSA-N	525	C00711	Carbohydrates	Sugar Metabolism, TCA Cycle, Pyruvate Metabolism, Glyoxylate Metabolism, Butanoate Metabolism, Phenylpropanoid Metabolism, Alkaloid Metabolism, Hormone Metabolism, Nicotinate and Nicotinamide Metabolism, Polyketide Metabolism, Carbon Fixation	Organic Acid, Carboxylic Acid, Fatty Acid	Dicarboxylic Acid, Short-chain Fatty Acid (SCFA), Hydroxy Fatty Acid (HFA), Hydroxy Short-chain Fatty Acid (H-SCFA), Dicarboxylic Fatty Acid (DC-FA)
Platform 3 (Primary Metabolites)	244	tartaric acid	Tartrate	FEWJPZIEWOKRBE-JCYAYHJZSA-N	444305	C00898	Carbohydrates	Glyoxylate Metabolism	Organic Acid, Carboxylic Acid, Fatty Acid	Dicarboxylic Acid, Short-chain Fatty Acid (SCFA), Hydroxy Fatty Acid (HFA), Hydroxy Short-chain Fatty Acid (H-SCFA), Dicarboxylic Fatty Acid (DC-FA), Dicarboxylic Short-chain Fatty Acid (DC-SCFA)
Platform 3 (Primary Metabolites)	287	maleic acid	cis-butenedioic acid	VZCYOOQTPOCHFL-UPHRSURJSA-L	444266	C01384	Carbohydrates	Tyrosine Metabolis, Butanoate Metabolism, Nicotinate and Nicotinamide Metabolism	Organic Acid, Carboxylic Acid, Fatty Acid	Dicarboxylic Acid, Short-chain Fatty Acid (SCFA), Unsaturated Short-chain Fatty Acid (U-SCFA), Unsaturated Fatty Acid (UFA), Monounsaturated Fatty Acid (MUFA), Dicarboxylic Fatty Acid (DC-FA), Dicarboxylic Short-chain Fatty Acid (DC-SCFA)
Platform 2 (Polyphenols and fatty acids)	152	2-Cyclopentene-1-octanoic acid, 5-(2-carboxyethyl)-.epsilon.,4-dioxo-, (1S,5R)-	tetranor-PGAM	HYPIFMOQVFWSBF-WCQYABFASA-N	58560006	NA	Lipids	Free Fatty Acid Metabolism, Dicarboxylic Fatty Acid Metabolism, Unsaturated Fatty Acid (UFA) Metabolism, Oxylipin Metabolism	Fatty Acids & Acyls	Dicarboxylic Fatty Acid (dcFA) (L1), Eicosanoid (Prostaglandin E2-like) (L2)	Dicarboxylic Fatty Acids (dcFAs)
Platform 2 (Polyphenols and fatty acids)	6	Tetradecanedioic acid	Tetradecanedioate	HQHCYKULIHKCEB-UHFFFAOYSA-N	13185	NA	Lipids	Free Fatty Acid Metabolism, Dicarboxylic Fatty Acid Metabolism, Saturated Fatty Acid (SFA) Metabolism	Fatty Acids & Acyls	Dicarboxylic Fatty Acid (dcFA) (L1), Long-chain Saturated Dicarboxylic Fatty Acid (LC-SdcFA) (L2)	Dicarboxylic Fatty Acids (dcFAs)
Platform 2 (Polyphenols and fatty acids)	194	(E)-3,10-Dihydroxy-4,9-dimethyldodec-6-enedioic acid	NA	FIDISSFBBFUTOK-ONEGZZNKSA-N	129008872	NA	Lipids	Free Fatty Acid Metabolism, Dicarboxylic Fatty Acid Metabolism, Unsaturated Fatty Acid (UFA) Metabolism, Oxylipin Metabolism	Fatty Acids & Acyls	Dicarboxylic Fatty Acid (dcFA) (L1), Medium-chain Monohydroxy Monounsaturated Dicarboxylic Fatty Acid (MC-MH-MUdcFA) (L2)	Dicarboxylic Fatty Acids (dcFAs)
Platform 2 (Polyphenols and fatty acids)	185	1-O-((2E,4E)-9-Carboxy-8-hydroxy-2,7-dimethylnona-2,4-dienoyl)-.beta.-D-glucopyranose	NA	JWAGJGCOOSEMAU-CGSVZCSKSA-N	16095194	NA	Lipids	Free Fatty Acid Metabolism, Dicarboxylic Fatty Acid Metabolism, Unsaturated Fatty Acid (UFA) Metabolism, Oxylipin Metabolism	Fatty Acids & Acyls	Dicarboxylic Fatty Acid (dcFA) (L1), Medium-chain Monohydroxy Polyunsaturated Dicarboxylic Fatty Acid (MC-MH-PUdcFA) (L2), Fatty Acid Glycoside (L3)	Dicarboxylic Fatty Acids (dcFAs)
Platform 2 (Polyphenols and fatty acids)	201	(4E)-8-(.beta.-D-Glucopyranosyloxy)-2,7-dimethyldec-4-enedioic acid	NA	QPCDZZMPXNUVCK-CJXBJLFHSA-N	129008949	NA	Lipids	Free Fatty Acid Metabolism, Dicarboxylic Fatty Acid Metabolism, Unsaturated Fatty Acid (UFA) Metabolism	Fatty Acids & Acyls	Dicarboxylic Fatty Acid (dcFA) (L1), Medium-chain Monohydroxy Polyunsaturated Dicarboxylic Fatty Acid (MC-MH-PUdcFA) (L2), Fatty Acid Glycoside (L3)	Dicarboxylic Fatty Acids (dcFAs)
Platform 2 (Polyphenols and fatty acids)	208	(2E,5E)-3,5,7-Trimethylocta-2,5-dienedioic acid	NA	WLVNOJMYBIEIPJ-KQQUZDAGSA-N	102571597	NA	Lipids	Free Fatty Acid Metabolism, Dicarboxylic Fatty Acid Metabolism, Unsaturated Fatty Acid (UFA) Metabolism	Fatty Acids & Acyls	Dicarboxylic Fatty Acid (dcFA) (L1), Medium-chain Polyunsaturated Dicarboxylic Fatty Acid (MC-PUdcFA) (L2)	Dicarboxylic Fatty Acids (dcFAs)
Platform 2 (Polyphenols and fatty acids)	72	Dodecanedioic acid	Dodecanedioate	TVIDDXQYHWJXFK-UHFFFAOYSA-N	12736	C02678	Lipids	Free Fatty Acid Metabolism, Dicarboxylic Fatty Acid Metabolism, Saturated Fatty Acid (SFA) Metabolism	Fatty Acids & Acyls	Dicarboxylic Fatty Acid (dcFA) (L1), Medium-chain Saturated Dicarboxylic Fatty Acid (MC-SdcFA) (L2)	Dicarboxylic Fatty Acids (dcFAs)
Platform 3 (Primary Metabolites)	350	azelaic acid	Nonanedioic acid	BDJRBEYXGGNYIS-UHFFFAOYSA-N	19347555	C08261	Lipids	Free Fatty Acid Metabolism, Dicarboxylic Fatty Acid Metabolism, Saturated Fatty Acid (SFA) Metabolism	Fatty Acids & Acyls	Dicarboxylic Fatty Acid (dcFA) (L1), Medium-chain Saturated Dicarboxylic Fatty Acid (MC-SdcFA) (L2)	Dicarboxylic Fatty Acids (dcFAs)
Platform 3 (Primary Metabolites)	356	adipic acid	Hexanedioate	WNLRTRBMVRJNCN-UHFFFAOYSA-N	196	C06104	Lipids	Free Fatty Acid Metabolism, Dicarboxylic Fatty Acid Metabolism, Saturated Fatty Acid (SFA) Metabolism	Fatty Acids & Acyls	Dicarboxylic Fatty Acid (dcFA) (L1), Medium-chain Saturated Dicarboxylic Fatty Acid (MC-SdcFA) (L2)	Dicarboxylic Fatty Acids (dcFAs)
Platform 3 (Primary Metabolites)	330	flavin adenine	flavin adenine dinucleotide (FAD)	IMGVNJNCCGXBHD-UYBVJOGSSA-O	444188	C00016	Nucleic Acids	Riboflavin Metabolism, Nucleotide and Nucleoside Metabolism, Purine Metabolism, Cofactor/Coenzyme Metabolism	Flavin, Nucleotide, Coenzyme	Dinucleotide, Purine-containing Dinucleotide, Flavin Nucleotide
Platform 2 (Polyphenols and fatty acids)	2	Valylphenylalanine	N-Valylphenylalanine	GJNDXQBALKCYSZ-UHFFFAOYSA-N	144746	NA	Peptides & Amino Acids	Amino Acid Metabolism, Non-Aromatic Amino Acid Metabolism, Aromatic Amino Acid Metabolism, Oligopeptide (<20 Residues) Metabolism	Oligopeptide	Dipeptide
Platform 2 (Polyphenols and fatty acids)	15	Ser-Tyr	Seryltyrosine	MALNXHYEPCSPPU-VHSXEESVSA-N	4575735	NA	Peptides & Amino Acids	Amino Acid Metabolism, Non-Aromatic Amino Acid Metabolism, Aromatic Amino Acid Metabolism, Oligopeptide (<20 Residues) Metabolism	Oligopeptide	Dipeptide
Platform 3 (Primary Metabolites)	308	glycyl tyrosine	Gly-Tyr	XBGGUPMXALFZOT-VIFPVBQESA-N	92829	NA	Peptides & Amino Acids	Oligopeptide (<20 Residues) Metabolism	Oligopeptide	Dipeptide
Platform 2 (Polyphenols and fatty acids)	78	D-Turanose	3-O-alpha-D-Glucopyranosyl-D-fructose	RULSWEULPANCDV-PIXUTMIVSA-N	5460935	C19636	Carbohydrates	Sugar Metabolism, Sugar (Mono- and di-saccharide) Metabolism	Disaccharide	Disaccharide, Hexose Disaccharide
Platform 2 (Polyphenols and fatty acids)	218	.alpha.,.beta.-Trehalose	Neotrehalose	HDTRYLNUVZCQOY-BTLHAWITSA-N	10871590	NA	Carbohydrates	Sugar Metabolism, Sugar (Mono- and di-saccharide) Metabolism	Disaccharide	Disaccharide, Hexose Disaccharide
Platform 3 (Primary Metabolites)	235	trehalose	glucopyranoside, D-(+)-Trehalose	HDTRYLNUVZCQOY-LIZSDCNHSA-N	7427	C01083	Carbohydrates	Sugar Metabolism, Sugar (Mono- and di-saccharide) Metabolism	Disaccharide	Disaccharide, Hexose Disaccharide
Platform 3 (Primary Metabolites)	280	melibiose	alpha-D-galactopyranosyl-1-6-D-glucopyranose	DLRVVLDZNNYCBX-ABXHMFFYSA-N	440658	C05402	Carbohydrates	Sugar Metabolism, Sugar (Mono- and di-saccharide) Metabolism	Disaccharide	Disaccharide, Hexose Disaccharide
Platform 3 (Primary Metabolites)	284	maltose	Maltobiose	GUBGYTABKSRVRQ-PICCSMPSSA-N	439186	C00208	Carbohydrates	Sugar Metabolism, Sugar (Mono- and di-saccharide) Metabolism, Starch Metabolism	Disaccharide	Disaccharide, Hexose Disaccharide
Platform 3 (Primary Metabolites)	298	lactose	4-O-beta-D-Galactopyranosyl-beta-D-glucopyranose	GUBGYTABKSRVRQ-XLOQQCSPSA-N	84571	C00243	Carbohydrates	Sugar Metabolism, Sugar (Mono- and di-saccharide) Metabolism	Disaccharide	Disaccharide, Hexose Disaccharide
Platform 3 (Primary Metabolites)	301	isomaltose	Brachiose	DLRVVLDZNNYCBX-RTPHMHGBSA-N	439193	C00252	Carbohydrates	Sugar Metabolism, Sugar (Mono- and di-saccharide) Metabolism, Starch Metabolism	Disaccharide	Disaccharide, Hexose Disaccharide
Platform 3 (Primary Metabolites)	347	beta-gentiobiose	6-O-beta-D-glucopyranosyl-D-glucopyranose	DLRVVLDZNNYCBX-LIZSDCNHSA-N	441422	C08240	Carbohydrates	Sugar Metabolism, Sugar (Mono- and di-saccharide) Metabolism	Disaccharide	Disaccharide, Hexose Disaccharide
Platform 2 (Polyphenols and fatty acids)	56	Hexyl 6-O-pentopyranosylhexopyranoside	NA	PSYNCYUUTFEJHA-UHFFFAOYSA-N	45359546	NA	Carbohydrates	Sugar Metabolism, Sugar (Mono- and di-saccharide) Metabolism, Acyl Sugar Metabolism	Acyl Sugar, Disaccharide	Disaccharide, Hexose Disaccharide, Acyl Disaccharide
Platform 3 (Primary Metabolites)	326	galactinol	1-alpha-D-Galactosyl-myo-inositol	VCWMRQDBPZKXKG-ZNVDUFQESA-N	11727586	C01235	Carbohydrates	Sugar Metabolism, Sugar (Mono- and di-saccharide) Metabolism, Sugar Alcohol Metabolism	Disaccharide, Sugar Alcohol	Disaccharide, Hexose Disaccharide, Disaccharide Sugar Alcohol
Platform 3 (Primary Metabolites)	247	sucrose	Saccharose	CZMRCDWAGMRECN-UGDNZRGBSA-N	5988	C00089	Carbohydrates	Sugar Metabolism, Sugar (Mono- and di-saccharide) Metabolism	Disaccharide	Disaccharide, Hexose/Pentose Disaccharide
Platform 2 (Polyphenols and fatty acids)	139	3-[2-(6,7-Dihydroxy-1,2,4a-trimethylspiro[3,4,6,7,8,8a-hexahydro-2H-naphthalene-5,2'-oxirane]-1-yl)ethyl]-2-hydroxy-2H-furan-5-one	NA	QMWJARHMJRTJMQ-UHFFFAOYSA-N	23986038	NA	Lipids	Terpenoid Metabolism, Tetraterpenoid (Carotenoid & Apocarotenoid) Metabolism, Plant Hormone Metabolism, Abscisic Acid Metabolism	Terpenoid/Isoprenoid	Diterpenoid (L1), Polycyclic Diterpenoid (L2)	Terpenoids
Platform 3 (Primary Metabolites)	236	tocopherol gamma-	NA	QUEDXNHFTDJVIY-DQCZWYHMSA-N	92729	C02483	Lipids	Terpenoid Metabolism, Tetraterpenoid (Carotenoid & Apocarotenoid) Metabolism, Plant Hormone Metabolism, Abscisic Acid Metabolism	Terpenoid/Isoprenoid	Diterpenoid (L1), Polycyclic Diterpenoid (L2), Tocopherol (L3), Fat-Soluble Vitamin (L4)	Terpenoids
Platform 3 (Primary Metabolites)	237	tocopherol delta-	NA	GZIFEOYASATJEH-VHFRWLAGSA-N	92094	C14151	Lipids	Terpenoid Metabolism, Tetraterpenoid (Carotenoid & Apocarotenoid) Metabolism, Plant Hormone Metabolism, Abscisic Acid Metabolism	Terpenoid/Isoprenoid	Diterpenoid (L1), Polycyclic Diterpenoid (L2), Tocopherol (L3), Fat-Soluble Vitamin (L4)	Terpenoids
Platform 3 (Primary Metabolites)	238	tocopherol beta	NA	WGVKWNUPNGFDFJ-CBIUGAAKSA-N	8989	C14152	Lipids	Terpenoid Metabolism, Tetraterpenoid (Carotenoid & Apocarotenoid) Metabolism, Plant Hormone Metabolism, Abscisic Acid Metabolism	Terpenoid/Isoprenoid	Diterpenoid (L1), Polycyclic Diterpenoid (L2), Tocopherol (L3), Fat-Soluble Vitamin (L4)	Terpenoids
Platform 3 (Primary Metabolites)	239	tocopherol alpha-	Vitamin E	NCYCYZXNIZJOKI-OVSJKPMPSA-N	14985	C02477	Lipids	Terpenoid Metabolism, Tetraterpenoid (Carotenoid & Apocarotenoid) Metabolism, Plant Hormone Metabolism, Abscisic Acid Metabolism	Terpenoid/Isoprenoid	Diterpenoid (L1), Polycyclic Diterpenoid (L2), Tocopherol (L3), Fat-Soluble Vitamin (L4)	Terpenoids
Platform 2 (Polyphenols and fatty acids)	10	Stearamide	Octadecanamide	LYRFLYHAGKPMFH-UHFFFAOYSA-N	31292	C13846	Lipids	Free Fatty Acid Metabolism, Saturated Fatty Acid (SFA) Metabolism, Fatty Acid Amide (FAA) Metabolism	Fatty Acids & Acyls	Fatty Acid Amide (FAA) (L1), Fatty Acid Primary Amide (FAPA) (L2)	Fatty Acid Amides (FAAs)
Platform 2 (Polyphenols and fatty acids)	27	Palmitamide	Palmitic Acid Amide	HSEMFIZWXHQJAE-UHFFFAOYSA-N	69421	NA	Lipids	Free Fatty Acid Metabolism, Saturated Fatty Acid (SFA) Metabolism, Fatty Acid Amide (FAA) Metabolism	Fatty Acids & Acyls	Fatty Acid Amide (FAA) (L1), Fatty Acid Primary Amide (FAPA) (L2)	Fatty Acid Amides (FAAs)
Platform 2 (Polyphenols and fatty acids)	66	Erucamide	Erucic Acid Amide	UAUDZVJPLUQNMU-KTKRTIGZSA-N	5365371	NA	Lipids	Free Fatty Acid Metabolism, Unsaturated Fatty Acid (UFA) Metabolism, Fatty Acid Amide (FAA) Metabolism	Fatty Acids & Acyls	Fatty Acid Amide (FAA) (L1), Fatty Acid Primary Amide (FAPA) (L2)	Fatty Acid Amides (FAAs)
Platform 3 (Primary Metabolites)	274	oleamide	Oleyl amide, Oleamide, Oleic Acid Amide	FATBGEAMYMYZAF-KTKRTIGZSA-N	5283387	C19670	Lipids	Free Fatty Acid Metabolism, Unsaturated Fatty Acid (UFA) Metabolism, Fatty Acid Amide (FAA) Metabolism	Fatty Acids & Acyls	Fatty Acid Amide (FAA) (L1), Fatty Acid Primary Amide (FAPA) (L2)	Fatty Acid Amides (FAAs)
Platform 2 (Polyphenols and fatty acids)	28	Oleoyl ethylamide	N-Ethyl-9Z-octadecenamide	JZJYYCFYGXPUMF-QXMHVHEDSA-N	44270319	NA	Lipids	Free Fatty Acid Metabolism, Unsaturated Fatty Acid (UFA) Metabolism, Fatty Acid Amide (FAA) Metabolism	Fatty Acids & Acyls	Fatty Acid Amide (FAA) (L1), Fatty Acid Secondary Amide (FASA) (L2), Fatty Acid Ethylamide (FA-EtA) (L3)	Fatty Acid Amides (FAAs)
Platform 2 (Polyphenols and fatty acids)	26	Palmitoleoyl ethanolamide	NA	WFRLANWAASSSFV-FPLPWBNLSA-N	9835868	NA	Lipids	Free Fatty Acid Metabolism, Unsaturated Fatty Acid (UFA) Metabolism, Fatty Acid Amide (FAA) Metabolism	Fatty Acids & Acyls	Fatty Acid Amide (FAA) (L1), Fatty Acid Secondary Amide (FASA) (L2), N-acylethanolamine (NAE) (L3)	Fatty Acid Amides (FAAs)
Platform 2 (Polyphenols and fatty acids)	35	N-Oleoylethanolamine	Oleoylethanolamide	BOWVQLFMWHZBEF-KTKRTIGZSA-N	5283454	C20792	Lipids	Free Fatty Acid Metabolism, Unsaturated Fatty Acid (UFA) Metabolism, Fatty Acid Amide (FAA) Metabolism	Fatty Acids & Acyls	Fatty Acid Amide (FAA) (L1), Fatty Acid Secondary Amide (FASA) (L2), N-acylethanolamine (NAE) (L3)	Fatty Acid Amides (FAAs)
Platform 2 (Polyphenols and fatty acids)	48	Linoleoyl ethanolamide	NA	KQXDGUVSAAQARU-HZJYTTRNSA-N	5283446	NA	Lipids	Free Fatty Acid Metabolism, Unsaturated Fatty Acid (UFA) Metabolism, Fatty Acid Amide (FAA) Metabolism	Fatty Acids & Acyls	Fatty Acid Amide (FAA) (L1), Fatty Acid Secondary Amide (FASA) (L2), N-acylethanolamine (NAE) (L3)	Fatty Acid Amides (FAAs)
Platform 2 (Polyphenols and fatty acids)	75	Dimethyl sebacate	Sebacic acid dimethyl ester	ALOUNLDAKADEEB-UHFFFAOYSA-N	7829	NA	Lipids	Free Fatty Acid Metabolism, Fatty Acid Ester (FAE) Metabolism	Fatty Acids & Acyls	Fatty Acid Ester (FAE) (L1), Fatty Acid Methyl Ester (FAME) (L2)	Fatty Acid Esters (FAEs)
Platform 2 (Polyphenols and fatty acids)	135	3-Hydroxy-5-methoxy-3-methyl-5-oxopentanoic acid	NA	UNHGPASVFNKZNR-UHFFFAOYSA-N	13180752	NA	Lipids	Free Fatty Acid Metabolism, Fatty Acid Ester (FAE) Metabolism	Fatty Acids & Acyls	Fatty Acid Ester (FAE) (L1), Fatty Acid Methyl Ester (FAME) (L2)	Fatty Acid Esters (FAEs)
Platform 3 (Primary Metabolites)	335	dodecanol	Lauryl alcohol	LQZZUXJYWNFBMV-UHFFFAOYSA-N	8193	C02277	Lipids	Free Fatty Acid Metabolism, Saturated Fatty Acid (SFA) Metabolism	Fatty Acids & Acyls	Fatty Acyl (L1), Fatty Alcohol (L2)	Fatty Alcohols
Platform 2 (Polyphenols and fatty acids)	70	Epicatechin	NA	PFTAWBLQPZVEMU-UKRRQHHQSA-N	72276	C09727	Phenolics	Flavonoid Metabolism	Flavanol, Polyphenol	Flavan-3-ol, Catechin
Platform 2 (Polyphenols and fatty acids)	212	(+)-Catechin	Catechuic acid, catechin, Cyanidanol	PFTAWBLQPZVEMU-DZGCQCFKSA-N	9064	C06562	Phenolics	Flavonoid Metabolism	Flavanol, Polyphenol	Flavan-3-ol, Catechin
Platform 2 (Polyphenols and fatty acids)	217	(-)-Catechin	NA	PFTAWBLQPZVEMU-HIFRSBDPSA-N	73160	C14079	Phenolics	Flavonoid Metabolism	Flavanol, Polyphenol,	Flavan-3-ol, Catechin
Platform 2 (Polyphenols and fatty acids)	21	Procyanidin C1	Proanthocyanidin C1	MOJZMWJRUKIQGL-CGFIDGTHSA-N	10234623	C17624	Phenolics	Flavonoid Metabolism, Tannin Metabolism, Condensed Tannin Metabolism	Flavanol, Polyphenol, Oligomeric Polyphenol	Flavan-3-ol, Flavan-3-ol Oligomer, Condensed Tannin (CT)
Platform 2 (Polyphenols and fatty acids)	22	Procyanidin B2	Proanthocyanidin B2	XFZJEEAOWLFHDH-ATEOAPGCSA-N	5320711	C17639	Phenolics	Flavonoid Metabolism, Tannin Metabolism, Condensed Tannin Metabolism	Flavanol, Polyphenol, Oligomeric Polyphenol	Flavan-3-ol, Flavan-3-ol Oligomer, Condensed Tannin (CT)
Platform 2 (Polyphenols and fatty acids)	34	Naringenin	4',5,7-Trihydroxyflavanone	FTVWIRXFELQLPI-ZDUSSCGKSA-N	439246	C00509	Phenolics	Flavonoid Metabolism, Isoflavonoid Metabolism	Flavanone, Polyphenol	Flavanone
Platform 2 (Polyphenols and fatty acids)	157	2-(4-Methylphenyl)-2,3-dihydro-4H-chromen-4-one	(2S)-2-(4-methylphenyl)-2,3-dihydrochromen-4-one	HITISLKGAFZTFZ-INIZCTEOSA-N	6542093	NA	Phenolics	Flavonoid Metabolism	Flavanone	Flavanone
Platform 2 (Polyphenols and fatty acids)	31	Narirutin	Naringenin 7-O-rutinoside	HXTFHSYLYXVTHC-TUURGLJWSA-N	477826	C09793	Phenolics	Flavonoid Metabolism, Sugar Metabolism, Sugar (Mono- and Di-saccharide Metabolism)	Flavanone, Polyphenol, O-Glycoside	Flavanone Glycoside, Phenolic Glycoside
Platform 2 (Polyphenols and fatty acids)	33	Naringenin-7-O-glucoside	Prunin	DLIKSSGEMUFQOK-RGHIGTIISA-N	9910767	C09099	Phenolics	Flavonoid Metabolism, Sugar Metabolism, Sugar (Mono- and Di-saccharide Metabolism)	Flavanone, Polyphenol, O-Glycoside	Flavanone Glycoside, Phenolic Glycoside
Platform 2 (Polyphenols and fatty acids)	67	Eriodictyol-7-O-glucoside	NA	RAFHNDRXYHOLSH-SFTVRKLSSA-N	13254473	NA	Phenolics	Flavonoid Metabolism, Sugar Metabolism, Sugar (Mono- and Di-saccharide Metabolism)	Flavanone, Polyphenol, O-Glycoside	Flavanone Glycoside, Phenolic Glycoside
Platform 2 (Polyphenols and fatty acids)	65	Flavanomarein	NA	DGGOLFCPSUVVHX-RTHJTPBESA-N	101781	NA	Phenolics	Flavonoid Metabolism	Flavone, Polyphenol, O-Glycoside	Flavone Glycoside, Phenolic Glycoside
Platform 2 (Polyphenols and fatty acids)	125	3,5,7,3',4'-Pentahydroxyflavanone	(+/-)-Taxifolin	CXQWRCVTCMQVQX-UHFFFAOYSA-N	471	C01617	Phenolics	Flavonoid Metabolism	Flavonol, Polyphenol	Flavonol
Platform 2 (Polyphenols and fatty acids)	19	Quercitrin	Quercetin 3-L-rhamnoside	OXGUCUVFOIWWQJ-HQBVPOQASA-N	5280459	C01750	Phenolics	Flavonoid Metabolism	Flavonol, Polyphenol, O-Glycoside	Flavonol Glycoside, Phenolic Glycoside
Platform 2 (Polyphenols and fatty acids)	54	Isoquercitin	Quercetin 3-O-glucoside	OVSQVDMCBVZWGM-LQSBFMDOSA-N	10813969	C05623	Phenolics	Flavonoid Metabolism	Flavonol, Polyphenol, O-Glycoside	Flavonol Glycoside, Phenolic Glycoside
Platform 2 (Polyphenols and fatty acids)	55	Hyperin	Quercetin 3-O-galactoside	OVSQVDMCBVZWGM-DTGCRPNFSA-N	5281643	C10073	Phenolics	Flavonoid Metabolism	Flavonol, Polyphenol, O-Glycoside	Flavonol Glycoside, Phenolic Glycoside
Platform 3 (Primary Metabolites)	362	5-Hydroxymethyl-2-furancarboxaldehyde	5-Hydroxymethylfurfural	NOEGNKMFWQHSLB-UHFFFAOYSA-N	237332	C11101	Carbohydrates	Sugar Metabolism, Sugar (Mono- and di-saccharide) Metabolism, Furfural Metabolism, Dehydration Metabolism	Furan	Furan, Dehydrated Hexose
Platform 2 (Polyphenols and fatty acids)	45	Methylgallate	Gallic Acid Methyl Ester	FBSFWRHWHYMIOG-UHFFFAOYSA-N	7428	NA	Phenolics	Aminobenzoate Metabolism, Gallic Acid Metabolism	Simple Phenol, Phenolic Ester	Gallate Ester
Platform 2 (Polyphenols and fatty acids)	71	Ellagic acid	Ellagate	AFSDNFLWKVMVRB-UHFFFAOYSA-N	5281855	C10788	Phenolics	Gallic Acid Metabolism, Tannin Metabolism, Ellagitannin Metabolism	Polyphenol, Phenolic Ester, Lactone	Gallate Ester, Dilactone
Platform 2 (Polyphenols and fatty acids)	88	Corilagin	NA	TUSDEZXZIZRFGC-UHFFFAOYSA-N	5089683	C10219	Phenolics	Gallic Acid Metabolism, Tannin Metabolism, Ellagitannin Metabolism	Polyphenol, Phenolic Ester, Lactone, Tannin	Gallate Ester, Ellagitannin (ET)
Platform 2 (Polyphenols and fatty acids)	58	Hamamelitannin	NA	FEPAFOYQTIEEIS-UHFFFAOYSA-N	253775	NA	Phenolics	Gallic Acid Metabolism, Tannin Metabolism, Hydrolyzable Tannin Metabolism	Polyphenol, Phenolic Ester, Tannin	Gallate Ester, Hydrolyzable Tannin (HT)
Platform 2 (Polyphenols and fatty acids)	111	6-O-((2E)-3-(4-Hydroxyphenyl)prop-2-enoyl)-1-O-(3,4,5-trihydroxybenzoyl)hexopyranose	NA	LWOXGQKLDYQLMZ-ZZXKWVIFSA-N	45359700	NA	Phenolics	Gallic Acid Metabolism, Tannin Metabolism, Hydrolyzable Tannin Metabolism	Polyphenol, Phenolic Ester, Tannin	Gallate Ester, Hydrolyzable Tannin (HT)
Platform 2 (Polyphenols and fatty acids)	167	1,6-Bis-O-(3,4,5-trihydroxybenzoyl)hexopyranose	Digalloylglucose	LYGRISUQIZNHGM-IVABAYMNSA-N	440221	NA	Phenolics	Gallic Acid Metabolism, Tannin Metabolism, Hydrolyzable Tannin Metabolism	Polyphenol, Phenolic Ester, Tannin	Gallate Ester, Hydrolyzable Tannin (HT)
Platform 2 (Polyphenols and fatty acids)	171	1,3,6-Tri-O-galloyl-.beta.-D-glucose	Trigalloylglucose	RNKMOGIPOMVCHO-SJMVAQJGSA-N	452707	NA	Phenolics	Gallic Acid Metabolism, Tannin Metabolism, Hydrolyzable Tannin Metabolism	Polyphenol, Phenolic Ester, Tannin	Gallate Ester, Hydrolyzable Tannin (HT)
Platform 2 (Polyphenols and fatty acids)	172	1,2,6-Trigalloylglucose	Trigalloylglucose	LLENXGNWVNSBQG-VFTFQOQOSA-N	440308	C04360	Phenolics	Gallic Acid Metabolism, Tannin Metabolism, Hydrolyzable Tannin Metabolism	Polyphenol, Phenolic Ester, Tannin	Gallate Ester, Hydrolyzable Tannin (HT)
Platform 2 (Polyphenols and fatty acids)	173	1,2,4,6-Tetragalloylglucose	Tetragalloylglucose	YXZYFHXWEOAXLF-UGAZNADUSA-N	11297287	NA	Phenolics	Gallic Acid Metabolism, Tannin Metabolism, Hydrolyzable Tannin Metabolism	Polyphenol, Phenolic Ester, Tannin	Gallate Ester, Hydrolyzable Tannin (HT)
Platform 2 (Polyphenols and fatty acids)	174	1,2,3,4,6-Pentagalloyl .beta.-D-glucose	Pentagalloylglucose	QJYNZEYHSMRWBK-NIKIMHBISA-N	65238	C04576	Phenolics	Gallic Acid Metabolism, Tannin Metabolism, Hydrolyzable Tannin Metabolism	Polyphenol, Phenolic Ester, Tannin	Gallate Ester, Hydrolyzable Tannin (HT)
Platform 2 (Polyphenols and fatty acids)	176	1,2,3,4-Tetragalloylglucose	Tetragalloylglucose	XFLTYUCKJRFDOU-XPMKZLBQSA-N	5321843	NA	Phenolics	Gallic Acid Metabolism, Tannin Metabolism, Hydrolyzable Tannin Metabolism	Polyphenol, Phenolic Ester, Tannin	Gallate Ester, Hydrolyzable Tannin (HT)
Platform 2 (Polyphenols and fatty acids)	178	1,2,3-Tris-O-(3,4,5-trihydroxybenzoyl)-.beta.-D-glucopyranose	Trigalloylglucose	MACFXELYCBWKGT-VFTFQOQOSA-N	5322038	NA	Phenolics	Gallic Acid Metabolism, Tannin Metabolism, Hydrolyzable Tannin Metabolism	Polyphenol, Phenolic Ester, Tannin	Gallate Ester, Hydrolyzable Tannin (HT)
Platform 3 (Primary Metabolites)	283	mannoheptulose	alpha-D-Mannoheptulopyranose	HSNZZMHEPUFJNZ-QMTIVRBISA-N	12600	C08236	Carbohydrates	Sugar Metabolism, Sugar (Mono- and di-saccharide) Metabolism	Monosaccharide	Heptose, Ketoheptose, Ketose
Platform 3 (Primary Metabolites)	322	glucoheptulose	Sedoheptulose	HSNZZMHEPUFJNZ-SHUUEZRQSA-N	5459879	C02076	Carbohydrates	Sugar Metabolism, Sugar (Mono- and di-saccharide) Metabolism, Pentose Phosphate Pathway	Monosaccharide	Heptose, Ketose, Ketoheptose
Platform 2 (Polyphenols and fatty acids)	61	Glucose	D-Glucose	GZCGUPFRVQAUEE-SLPGGIOYSA-N	107526	C00031	Carbohydrates	Sugar Metabolism, Sugar (Mono- and di-saccharide) Metabolism, Amino and Nucleotide Sugar Metabolism, Glycolysis/Gluconeogenesis, Starch Metabolism, Glycerolipid Metabolism, Pentose Phosphate Pathway, Alkaloid Metabolism	Monosaccharide	Hexose, Aldohexose, Aldose
Platform 3 (Primary Metabolites)	282	mannose	Mannopyranose	WQZGKKKJIJFFOK-QTVWNMPRSA-N	18950	C00159	Carbohydrates	Sugar Metabolism, Sugar (Mono- and di-saccharide) Metabolism, Amino and Nucleotide Sugar Metabolism	Monosaccharide	Hexose, Aldohexose, Aldose
Platform 3 (Primary Metabolites)	319	glucose	Dextrose	WQZGKKKJIJFFOK-VFUOTHLCSA-N	64689	C00221	Carbohydrates	Sugar Metabolism, Sugar (Mono- and di-saccharide) Metabolism, Amino and Nucleotide Sugar Metabolism, Glycolysis/Gluconeogenesis, Starch Metabolism, Glycerolipid Metabolism, Pentose Phosphate Pathway, Alkaloid Metabolism	Monosaccharide	Hexose, Aldohexose, Aldose
Platform 3 (Primary Metabolites)	324	galactose	alpha-D-galactose	WQZGKKKJIJFFOK-PHYPRBDBSA-N	439357	C00984	Carbohydrates	Sugar Metabolism, Sugar (Mono- and di-saccharide) Metabolism, Amino and Nucleotide Sugar Metabolism, Hemicellulose Metabolism, Cell Wall Metabolism	Monosaccharide	Hexose, Aldohexose, Aldose
Platform 3 (Primary Metabolites)	366	3,6-anhydro-D-glucose	3,6-Anhydroglucose	WZYRMLAWNVOIEX-SLPGGIOYSA-N	16069993	C06478	Carbohydrates	Sugar Metabolism, Sugar (Mono- and di-saccharide) Metabolism	Monosaccharide	Hexose, Aldohexose, Aldose, Anhydrohexose
Platform 3 (Primary Metabolites)	367	3,6-anhydro-D-galactose	3,6-Anhydrogalactose	WZYRMLAWNVOIEX-BGPJRJDNSA-N	16069996	C06474	Carbohydrates	Sugar Metabolism, Sugar (Mono- and di-saccharide) Metabolism	Monosaccharide	Hexose, Aldohexose, Aldose, Anhydrohexose
Platform 2 (Polyphenols and fatty acids)	40	N-Acetyl-D-glucosamine	GlcNAc	OVRNDRQMDRJTHS-PVFLNQBWSA-N	82313	C00140	Carbohydrates	Sugar Metabolism, Sugar (Mono- and di-saccharide) Metabolism, Amino and Nucleotide Sugar Metabolism	Monosaccharide, Amide	Hexose, Amino Sugar, Amino Hexose
Platform 3 (Primary Metabolites)	295	levoglucosan	1,6-Anhydro-beta-D-glucopyranose	TWNIBLMWSKIRAT-VFUOTHLCSA-N	2724705	C22350	Carbohydrates	Sugar Metabolism, Sugar (Mono- and di-saccharide) Metabolism, Sugar (Polysaccharide) Metabolism	Monosaccharide	Hexose, Anhydrohexose
Platform 3 (Primary Metabolites)	320	gluconic acid lactone	Gluconolactone	PHOQVHQSTUBQQK-SQOUGZDYSA-N	7027	C00198	Carbohydrates	Sugar Metabolism, Sugar (Mono- and di-saccharide) Metabolism, Lactone Metabolism, Ascorbate and Aldarate Metabolism	Monosaccharide, Lactone	Hexose, Delta-Lactone
Platform 3 (Primary Metabolites)	328	fucose	Fuc	SHZGCJCMOBCMKK-FPRJBGLDSA-N	439650	C02095	Carbohydrates	Sugar Metabolism, Sugar (Mono- and di-saccharide) Metabolism, N-Glycan Metabolism	Monosaccharide	Hexose, Deoxyhexose
Platform 3 (Primary Metabolites)	359	6-deoxyglucose	D-quinovose	PNNNRSAQSRJVSB-JGWLITMVSA-N	441480	C08352	Carbohydrates	Sugar Metabolism, Sugar (Mono- and di-saccharide) Metabolism	Monosaccharide	Hexose, Deoxyhexose
Platform 2 (Polyphenols and fatty acids)	81	D-Psicose	Pseudofructose	BJHIKXHVCXFQLS-PUFIMZNGSA-N	90008	C06468	Carbohydrates	Sugar Metabolism, Sugar (Mono- and di-saccharide) Metabolism	Monosaccharide	Hexose, Ketohexose, Ketose
Platform 2 (Polyphenols and fatty acids)	84	D-Fructose	Levulose	BJHIKXHVCXFQLS-UYFOZJQFSA-N	5984	C00095	Carbohydrates	Sugar Metabolism, Sugar (Mono- and di-saccharide) Metabolism, Amino and Nucleotide Sugar Metabolism	Monosaccharide	Hexose, Ketohexose, Ketose
Platform 3 (Primary Metabolites)	245	tagatose	lyxo-Hexulose	LKDRXBCSQODPBY-OEXCPVAWSA-N	439312	C00795	Carbohydrates	Sugar Metabolism, Sugar (Mono- and di-saccharide) Metabolism	Monosaccharide	Hexose, Ketohexose, Ketose
Platform 3 (Primary Metabolites)	329	fructose	beta-Levulose	RFSUNEUAIZKAJO-ARQDHWQXSA-N	439709	C02336	Carbohydrates	Sugar Metabolism, Sugar (Mono- and di-saccharide) Metabolism, Amino and Nucleotide Sugar Metabolism	Monosaccharide	Hexose, Ketohexose, Ketose
Platform 2 (Polyphenols and fatty acids)	121	4-(Acetyloxy)-3-methoxybenzoic acid	o-Acetylvanillic acid	WTPDKEAYVAXNRO-UHFFFAOYSA-N	66346	NA	Phenolics	Phenylpropanoid Metabolism	Simple Phenol, Phenolic Ester, Carboxylic Acid	Hydroxybenzoic Acid, Benzoate Ester, Monocarboxylic Acid
Platform 2 (Polyphenols and fatty acids)	120	4-(Hexopyranosyloxy)-3-methoxybenzoic acid	Vanillic acid 4-β-D-glucoside	JYFOSWJYZIVJPO-UHFFFAOYSA-N	14132336	NA	Phenolics	Phenylpropanoid Metabolism, Sugar Metabolism, Sugar (Mono- and Di-saccharide Metabolism)	Simple Phenol, Phenolic Ester, Carboxylic Acid, O-Glycoside	Hydroxybenzoic Acid, Benzoate Ester, Monocarboxylic Acid, Phenolic Glycoside, Benzoate Glycoside
Platform 2 (Polyphenols and fatty acids)	1	Vanillic acid	Vanillate	WKOLLVMJNQIZCI-UHFFFAOYSA-N	8468	C06672	Phenolics	Phenylpropanoid Metabolism, Aminobenzoate Metabolism	Simple Phenol, Phenolic Acid, Carboxylic Acid	Hydroxybenzoic Acid, Monocarboxylic Acid
Platform 2 (Polyphenols and fatty acids)	7	Syringic acid	Syringate	JMSVCTWVEWCHDZ-UHFFFAOYSA-N	10742	C10833	Phenolics	Phenylpropanoid Metabolism, Aminobenzoate Metabolism	Simple Phenol, Phenolic Acid, Carboxylic Acid	Hydroxybenzoic Acid, Monocarboxylic Acid
Platform 3 (Primary Metabolites)	363	4-hydroxybenzoic acid	Hydroxybenzoic acid	FJKROLUGYXJWQN-UHFFFAOYSA-N	135	C00156	Phenolics	Phenylpropanoid Metabolism, Benzoate Metabolism, Ubiquinone/Terpene-quinone Metabolism, Bisphenol Metabolism	Simple Phenol, Phenolic Acid, Carboxylic Acid	Hydroxybenzoic Acid, Monocarboxylic Acid
Platform 3 (Primary Metabolites)	370	3,4-dihydroxybenzoic acid	Protocatechuic acid	YQUVCSBJEUQKSH-UHFFFAOYSA-N	72	C00230	Phenolics	Phenylpropanoid Metabolism, Benzoate Metabolism, Amino Acid Metabolism, Aromatic Amino Acid Metabolism	Simple Phenol, Phenolic Acid, Carboxylic Acid	Hydroxybenzoic Acid, Monocarboxylic Acid
Platform 2 (Polyphenols and fatty acids)	13	Simmondsin 2'-ferulate	[(2R,3R,4S,5S,6R)-2-[(1R,2Z,3S,4R,5S)-2-(cyanomethylidene)-3-hydroxy-4,5-dimethoxycyclohexyl]oxy-4,5-dihydroxy-6-(hydroxymethyl)oxan-3-yl] (Z)-3-(4-hydroxy-3-methoxyphenyl)prop-2-enoate	GWXJMPVVJCHQIB-PDZFWYMXSA-N	6442644	NA	Phenolics	Phenylpropanoid Metabolism, Sugar Metabolism, Sugar (Mono- and Di-saccharide Metabolism)	Simple Phenol, O-Glycoside	Hydroxycinnamate Glycoside, Phenolic Glycoside
Platform 2 (Polyphenols and fatty acids)	110	6-O-((2Z)-3-(4-Hydroxy-3-methoxyphenyl)prop-2-enoyl)-.beta.-D-fructofuranosyl 6-O-acetyl-.alpha.-D-glucopyranoside	NA	ZIUKDKVKRXUKAP-GOJYQDROSA-N	125416603	NA	Phenolics	Phenylpropanoid Metabolism, Sugar Metabolism, Sugar (Mono- and Di-saccharide Metabolism)	Simple Phenol, O-Glycoside	Hydroxycinnamate Glycoside, Phenolic Glycoside
Platform 2 (Polyphenols and fatty acids)	148	2-O-Hexopyranosyl-6-O-((2E)-3-(4-hydroxyphenyl)prop-2-enoyl)hexopyranose	NA	ZPHQZULZLQMWGY-ZZXKWVIFSA-N	45359866	NA	Phenolics	Phenylpropanoid Metabolism, Sugar Metabolism, Sugar (Mono- and Di-saccharide Metabolism)	Simple Phenol, O-Glycoside	Hydroxycinnamate Glycoside, Phenolic Glycoside
Platform 2 (Polyphenols and fatty acids)	117	4-O-p-Coumaroylquinic acid	4-Coumaroylquinic acid	XWRHBGVVCOSNKO-OTCYKTEZSA-N	363668067	C10441	Phenolics	Phenylpropanoid Metabolism	Simple Phenol, Phenolic Ester, Carboxylic Acid	Hydroxycinnamic Acid, Cinnamate Ester, Monocarboxylic Acid
Platform 2 (Polyphenols and fatty acids)	132	3-O-Coumaroylquinic acid	3-p-Coqa	BMRSEYFENKXDIS-QHAYPTCMSA-N	9945785	C12208	Phenolics	Phenylpropanoid Metabolism	Simple Phenol, Phenolic Ester, Carboxylic Acid	Hydroxycinnamic Acid, Cinnamate Ester, Monocarboxylic Acid
Platform 3 (Primary Metabolites)	303	isochlorogenic acid	5-O-caffeoyl quinic acid	CWVRJTMFETXNAD-DUXPYHPUSA-N	5315832	C00852	Phenolics	Phenylpropanoid Metabolism, Flavonoid Metabolism, Lignin/Lignan Metabolism, Cell Wall Metabolism, Stillbenoid Metabolism	Simple Phenol, Phenolic Ester, Carboxylic Acid	Hydroxycinnamic Acid, Cinnamate Ester, Monocarboxylic Acid
Platform 2 (Polyphenols and fatty acids)	134	3-Methoxycinnamic acid	NA	LZPNXAULYJPXEH-AATRIKPKSA-N	637668	NA	Phenolics	Phenylpropanoid Metabolism	Simple Phenol, Phenolic Acid, Carboxylic Acid	Hydroxycinnamic Acid, Monocarboxylic Acid
Platform 2 (Polyphenols and fatty acids)	149	2-Methylcinnamic acid	NA	RSWBWHPZXKLUEX-VOTSOKGWSA-N	819020	NA	Phenolics	Phenylpropanoid Metabolism	Simple Phenol, Phenolic Acid, Carboxylic Acid	Hydroxycinnamic Acid, Monocarboxylic Acid
Platform 2 (Polyphenols and fatty acids)	59	Grevillic acid	2,5-Dihydroxycinnamic acid	JXIPYOZBOMUUCA-DAFODLJHSA-N	6442618	NA	Phenolics	Phenylpropanoid Metabolism, Cell Wall Metabolism, Lignin/Lignan Metabolism	Simple Phenol, Phenolic Acid, Monolignol, Carboxylic Acid	Hydroxycinnamic Acid, Monolignol, Monocarboxylic Acid
Platform 2 (Polyphenols and fatty acids)	126	3,5-Dimethoxy-4-hydroxycinnamic acid	Sinapinic Acid, Sinapic Acid	PCMORTLOPMLEFB-ONEGZZNKSA-N	637775	C00482	Phenolics	Phenylpropanoid Metabolism, Lignin/Lignan Metabolism, Cell Wall Metabolism	Simple Phenol, Phenolic Acid, Monolignol, Carboxylic Acid	Hydroxycinnamic Acid, Monolignol, Monocarboxylic Acid
Platform 3 (Primary Metabolites)	331	ferulic acid	Ferulate, trans-Ferulic acid, 4-Hydroxy-3-methoxycinnamic acid	KSEBMYQBYZTDHS-HWKANZROSA-N	445858	C01494	Phenolics	Phenylpropanoid Metabolism, Lignin/Lignan Metabolism, Cell Wall Metabolism	Simple Phenol, Phenolic Acid, Monolignol, Carboxylic Acid	Hydroxycinnamic Acid, Monolignol, Monocarboxylic Acid
Platform 3 (Primary Metabolites)	369	3,4-dihydroxycinnamic acid	Caffeic acid	QAIPRVGONGVQAS-DUXPYHPUSA-N	689043	C01197	Phenolics	Phenylpropanoid Metabolism, Cell Wall Metabolism, Lignin/Lignan Metabolism	Simple Phenol, Phenolic Acid, Monolignol, Carboxylic Acid	Hydroxycinnamic Acid, Monolignol, Monocarboxylic Acid
Platform 2 (Polyphenols and fatty acids)	36	N-Methyltryptamine	NA	NCIKQJBVUNUXLW-UHFFFAOYSA-N	6088	C06213	Phenolics	Tryptophan Metabolism, Amino Acid Metabolism, Aromatic Amino Acid Metabolism, Alkaloid Metabolism	Amine, Biogenic Amine, Alkaloid, Simple Phenol	Indolamine, True Alkaloid (Amino Acid Derived w/ Nitrogen Heterocycle), Diamine
Platform 3 (Primary Metabolites)	361	5-methoxytryptamine	5-MeOT	JTEJPPKMYBDEMY-UHFFFAOYSA-N	1833	C05659	Phenolics	Tryptophan Metabolism, Amino Acid Metabolism, Aromatic Amino Acid Metabolism, Alkaloid Metabolism	Amine, Biogenic Amine, Alkaloid, Simple Phenol	Indolamine, True Alkaloid (Amino Acid Derived w/ Nitrogen Heterocycle), Diamine
Platform 2 (Polyphenols and fatty acids)	76	Dihydrophaseic acid	Epi-dihydrophaseic acid	XIVFQYWMMJWUCD-FJBUYRLMSA-N	11988273	C15971	Lipids	Terpenoid Metabolism, Tetraterpenoid (Carotenoid & Apocarotenoid) Metabolism, Plant Hormone Metabolism, Abscisic Acid Metabolism	Terpenoid/Isoprenoid	Isoprenoid/Terpenoid (L1), Tetraterpenoid (L2), Apocarotenoid (L3), Apocarotenoid Aglycone (L4)	Terpenoids
Platform 2 (Polyphenols and fatty acids)	17	Salsolinol	6,7-Isoquinolinediol, 1,2,3,4-tetrahydro-1-methyl-, (S)-	IBRKLUSXDYATLG-LURJTMIESA-N	91588	C09642	Alkaloids	Amino Acid Metabolism, Aromatic Amino Acid Metabolism, Alkaloid Metabolism, Tyrosine Metabolism, Phenylalanine Metabolism	Amine, Biogenic Amine, Alkaloid, True Alkaloid (Amino Acid Derived w/ Nitrogen Heterocycle), Simple Phenol	Isoquinoline Alkaloid, Monoamine
Platform 2 (Polyphenols and fatty acids)	11	Spiculisporic acid	(2S)-2-[(1R)-1-carboxyundecyl]-5-oxooxolane-2-carboxylic acid	TUXHHVJPGQUPCF-GUYCJALGSA-N	95228526	NA	Lipids	Free Fatty Acid Metabolism, Lactone Metabolism	Fatty Acids & Acyls	Lactone (L1), γ-Lactone (L2)	Lactones
Platform 2 (Polyphenols and fatty acids)	113	5-(Hydroxymethyl)-3-(1-hydroxy-4-methylhexyl)oxolan-2-one	NA	KWEIJKWXQKCOKC-UHFFFAOYSA-N	23930375	NA	Lipids	Free Fatty Acid Metabolism, Unsaturated Fatty Acid (UFA) Metabolism, Lactone Metabolism, Oxylipin Metabolism	Fatty Acids & Acyls	Lactone (L1), γ-Lactone (L2)	Lactones
Platform 2 (Polyphenols and fatty acids)	114	5-(6-Methyl-7-oxooctyl)furan-2(5H)-one	NA	MSOHKYKACHEERC-UHFFFAOYSA-N	11075054	NA	Lipids	Free Fatty Acid Metabolism, Unsaturated Fatty Acid (UFA) Metabolism, Lactone Metabolism, Oxylipin Metabolism	Fatty Acids & Acyls	Lactone (L1), γ-Lactone (L2)	Lactones
Platform 2 (Polyphenols and fatty acids)	144	2(5H)-Furanone, 5-(7-hydroxy-6-methyloctyl)-	2-(7-hydroxy-6-methyloctyl)-2H-furan-5-one	AEPMKZIOUKHDOO-UHFFFAOYSA-N	58370762	NA	Lipids	Free Fatty Acid Metabolism, Unsaturated Fatty Acid (UFA) Metabolism, Lactone Metabolism, Oxylipin Metabolism	Fatty Acids & Acyls	Lactone (L1), γ-Lactone (L2)	Lactones
Platform 2 (Polyphenols and fatty acids)	106	9-(2,3-Dihydroxypropoxy)-9-oxononanoic acid	NA	BQRISQXLSXCXSC-UHFFFAOYSA-N	45783154	NA	Lipids	Glyceride Metabolism, Dicarboxylic Fatty Acid Metabolism	Glycerolipid	Monoacylglycerol (MG) (L1), Saturated Monoacylglycerol (S-MG) (L2)	Glycerolipids
Platform 3 (Primary Metabolites)	279	monoheptadecanoyl glyceride	MG 17:0	SVUQHVRAGMNPLW-UHFFFAOYSA-N	107036	NA	Lipids	Glyceride Metabolism	Glycerolipid	Monoacylglycerol (MG) (L1), Saturated Monoacylglycerol (S-MG) (L2)	Glycerolipids
Platform 3 (Primary Metabolites)	375	1-monopalmitin	Glyceryl palmitate	QHZLMUACJMDIAE-UHFFFAOYSA-N	14900	NA	Lipids	Glyceride Metabolism	Glycerolipid	Monoacylglycerol (MG) (L1), Saturated Monoacylglycerol (S-MG) (L2)	Glycerolipids
Platform 2 (Polyphenols and fatty acids)	44	Monoelaidin	Glyceryl monooleate	RZRNAYUHWVFMIP-MDZDMXLPSA-N	5364833	NA	Lipids	Glyceride Metabolism	Glycerolipid	Monoacylglycerol (MG) (L1), Unsaturated Monoacylglycerol (U-MG) (L2)	Glycerolipids
Platform 2 (Polyphenols and fatty acids)	187	1-Monolinoleoyl-rac-glycerol	Glyceryl monolinoleate	WECGLUPZRHILCT-HZJYTTRNSA-N	5283469	NA	Lipids	Glyceride Metabolism	Glycerolipid	Monoacylglycerol (MG) (L1), Unsaturated Monoacylglycerol (U-MG) (L2)	Glycerolipids
Platform 3 (Primary Metabolites)	371	2-monoolein	2-Oleoylglycerol	UPWGQKDVAURUGE-KTKRTIGZSA-N	5319879	NA	Lipids	Glyceride Metabolism	Glycerolipid	Monoacylglycerol (MG) (L1), Unsaturated Monoacylglycerol (U-MG) (L2)	Glycerolipids
Platform 3 (Primary Metabolites)	376	1-monoolein	Glyceryl monooleate	RZRNAYUHWVFMIP-KTKRTIGZSA-N	5283468	NA	Lipids	Glyceride Metabolism	Glycerolipid	Monoacylglycerol (MG) (L1), Unsaturated Monoacylglycerol (U-MG) (L2)	Glycerolipids
Platform 3 (Primary Metabolites)	305	hydroxylamine	Nitroxide	AVXURJPOCDRRFD-UHFFFAOYSA-N	787	C00192	Unclassified	Nitrogen Metabolism	Amine, Inorganic Amine	Monoamine
Platform 2 (Polyphenols and fatty acids)	93	Betaine	Trimethylglycine	KWIUHFFTVRNATP-UHFFFAOYSA-N	247	C00719	Peptides & Amino Acids	Amino Acid Metabolism, Non-Aromatic Amino Acid Metabolism, Betaine Metabolism	Amino Acid, Carboxylic Acid, Amine, Biogenic Amine	Monoamine, Monocarboxylic Acid
Platform 2 (Polyphenols and fatty acids)	14	Shikimic acid	Shikimate	JXOHGGNKMLTUBP-HSUXUTPPSA-N	8742	C00493	Phenolics	Amino Acid Metabolism, Aromatic Amino Acid Metabolism, Shikimate Pathway, Alkaloid Metabolism, Hormone Metabolism, Cofactor Metabolism, Phenylpropanoid Metabolism	Carboxylic Acid	Monocarboxylic Acid
Platform 3 (Primary Metabolites)	299	lactic acid	lactate	JVTAAEKCZFNVCJ-UHFFFAOYSA-N	612	C01432	Carbohydrates	Glycolysis/Gluconeogenesis, Sugar Metabolism, Sugar (Mono- and Di-saccharide) Metabolism, Propanoate Metabolism, Pyruvate Metabolism, Fermentation	Organic Acid, Carboxylic Acid, Fatty Acid	Monocarboxylic Acid, Short-chain Fatty Acid (SCFA), Hydroxy Fatty Acid (HFA), Hydroxy Short-chain Fatty Acid (H-SCFA)
Platform 3 (Primary Metabolites)	309	glycolic acid	Glycolate	AEMRFAOFKBGASW-UHFFFAOYSA-N	757	C00160	Carbohydrates	Glyoxylate Metabolism, Photorespiration	Organic Acid, Carboxylic Acid, Fatty Acid	Monocarboxylic Acid, Short-chain Fatty Acid (SCFA), Hydroxy Fatty Acid (HFA), Hydroxy Short-chain Fatty Acid (H-SCFA)
Platform 3 (Primary Metabolites)	365	3-hydroxybutyric acid	3-Hydroxybutanoate	WHBMMWSBFZVSSR-GSVOUGTGSA-N	92135	C01089	Peptides & Amino Acids	Butanoate Metabolism, Amino Acid Metabolism, Non-aromatic Amino Acid Metabolism	Organic Acid, Fatty Acid, Carboxylic Acid	Monocarboxylic Acid, Short-chain Fatty Acid (SCFA), Hydroxy Fatty Acid (HFA), Hydroxy Short-chain Fatty Acid (H-SCFA)
Platform 3 (Primary Metabolites)	314	glyceric acid	Glycerate	RBNPOMFGQQGHHO-UHFFFAOYSA-N	752	C00258	Carbohydrates	Sugar Metabolism, Sugar (Mono- and di-saccharide) Metabolism, Sugar Acid Metabolism, Glyceride Metabolism, Amino Acid Metabolism, Non-Aromatic Amino Acid Metabolism, Glyoxylate Metabolism, Pentose Phosphate Pathway	Organic Acid, Sugar Acid, Carboxylic Acid, Fatty Acid	Monocarboxylic Acid, Short-chain Fatty Acid (SCFA), Hydroxy Fatty Acid (HFA), Hydroxy Short-chain Fatty Acid (H-SCFA), Sugar Acid, C3 Sugar Acid
Platform 3 (Primary Metabolites)	241	threonic acid	L-Threonate	JPIJQSOTBSSVTP-STHAYSLISA-N	5460407	C01620	Carbohydrates	Sugar Metabolism, Sugar (Mono- and di-saccharide) Metabolism, Sugar Acid Metabolism, Ascorbate and Aldarate Metabolism	Sugar Acid, Carboxylic Acid, Organic Acid, Fatty Acid	Monocarboxylic Acid, Sugar Acid, C4 Sugar Acid, Short-chain Fatty Acid (SCFA), Hydroxy Fatty Acid (HFA), Hydroxy Short-chain Fatty Acid (H-SCFA)
Platform 3 (Primary Metabolites)	300	isothreonic acid	D-Threonate, Threonic acid, Threonate	JPIJQSOTBSSVTP-GBXIJSLDSA-N	151152	C01620	Carbohydrates	Sugar Metabolism, Sugar (Mono- and di-saccharide) Metabolism, Sugar Acid Metabolism, Ascorbate and Aldarate Metabolism	Sugar Acid, Carboxylic Acid, Organic Acid, Fatty Acid	Monocarboxylic Acid, Sugar Acid, C4 Sugar Acid, Short-chain Fatty Acid (SCFA), Hydroxy Fatty Acid (HFA), Hydroxy Short-chain Fatty Acid (H-SCFA)
Platform 3 (Primary Metabolites)	257	ribonic acid	ribonate	QXKAIJAYHKCRRA-BXXZVTAOSA-N	5460677	C01685	Carbohydrates	Sugar Metabolism, Sugar (Mono- and di-saccharide) Metabolism, Sugar Acid Metabolism	Sugar Acid, Carboxylic Acid, Organic Acid	Monocarboxylic Acid, Sugar Acid, C5 Sugar Acid
Platform 2 (Polyphenols and fatty acids)	83	D-Gluconic acid	Gluconate	RGHNJXZEOKUKBD-SQOUGZDYSA-N	10690	C00257	Carbohydrates	Sugar Metabolism, Sugar (Mono- and di-saccharide) Metabolism, Sugar Acid Metabolism, Pentose Phosphate Pathway	Sugar Acid, Carboxylic Acid, Organic Acid	Monocarboxylic Acid, Sugar Acid, C6 Sugar Acid
Platform 3 (Primary Metabolites)	278	mucic acid	Galactaric acid	DSLZVSRJTYRBFB-DUHBMQHGSA-N	3037582	C00879	Carbohydrates	Sugar Metabolism, Sugar (Mono- and di-saccharide) Metabolism, Sugar Acid Metabolism	Sugar Acid, Carboxylic Acid, Organic Acid	Monocarboxylic Acid, Sugar Acid, C6 Sugar Acid
Platform 3 (Primary Metabolites)	317	glucuronic acid	Glucuronate	AEMOLEFTQBMNLQ-AQKNRBDQSA-N	94715	C00191	Carbohydrates	Sugar Metabolism, Sugar (Mono- and di-saccharide) Metabolism, Sugar Acid Metabolism, Ascorbate and Aldarate Metabolism, Amino and Nucleotide Sugar Metabolism	Sugar Acid, Carboxylic Acid, Organic Acid	Monocarboxylic Acid, Sugar Acid, C6 Sugar Acid
Platform 3 (Primary Metabolites)	321	gluconic acid	Gulonate	RGHNJXZEOKUKBD-QTBDOELSSA-N	6857417	C00800	Carbohydrates	Sugar Metabolism, Sugar (Mono- and di-saccharide) Metabolism, Pentose Phosphate Pathway, Ascorbate and Aldarate Metabolism	Sugar Acid, Carboxylic Acid, Organic Acid	Monocarboxylic Acid, Sugar Acid, C6 Sugar Acid
Platform 3 (Primary Metabolites)	323	galacturonic acid	beta-D-galacturonic acid	AEMOLEFTQBMNLQ-DTEWXJGMSA-N	441476	C08348	Carbohydrates	Sugar Metabolism, Sugar (Mono- and di-saccharide) Metabolism, Pectin Metabolism, Cell Wall Metabolism	Sugar Acid, Carboxylic Acid, Organic Acid	Monocarboxylic Acid, Sugar Acid, C6 Sugar Acid
Platform 3 (Primary Metabolites)	325	galactonic acid	Galactonate	RGHNJXZEOKUKBD-MGCNEYSASA-N	128869	C00880	Carbohydrates	Sugar Metabolism, Sugar (Mono- and di-saccharide) Metabolism, Sugar Acid Metabolism	Sugar Acid, Carboxylic Acid, Organic Acid	Monocarboxylic Acid, Sugar Acid, C6 Sugar Acid
Platform 2 (Polyphenols and fatty acids)	151	2-Keto-3-deoxyoctonic acid	6-(1,2-dihydroxyethyl)-2,4,5-trihydroxyoxane-2-carboxylic acid	NNLZBVFSCVTSLA-UHFFFAOYSA-N	4636210	NA	Carbohydrates	Sugar Metabolism, Sugar (Mono- and di-saccharide) Metabolism, Sugar Acid Metabolism	Sugar Acid, Carboxylic Acid	Monocarboxylic Acid, Sugar Acid, C8 Sugar Acid
Platform 2 (Polyphenols and fatty acids)	101	9,10-Dihydrojasmonic acid	Dihydrojasmonic acid	PQEYTAGBXNEUQL-NXEZZACHSA-N	644120	NA	Lipids	Free Fatty Acid Metabolism, Unsaturated Fatty Acid (UFA) Metabolism, Lactone Metabolism, Oxylipin Metabolism, Hormone Metabolism	Fatty Acids & Acyls	Monocarboxylic Fatty Acid (MC-FA) (L1), Jasmonate (L2)	Lactones
Platform 2 (Polyphenols and fatty acids)	99	9(10)-Epoxy-12Z-octadecenoic acid	9(10)-EpOME	FBUKMFOXMZRGRB-XKJZPFPASA-N	12097313	C14825	Lipids	Free Fatty Acid Metabolism, Unsaturated Fatty Acid (UFA) Metabolism, Oxylipin Metabolism	Fatty Acids & Acyls	Monocarboxylic Fatty Acid (MC-FA) (L1), Long-chain Monoepoxy Monounsaturated Fatty Acid (LC-MEp-MUFA) (L2), Omega-6 Fatty Acid (Om6FA) (L3)	Free Fatty Acids (FFAs)
Platform 2 (Polyphenols and fatty acids)	162	13-Keto-9Z,11E-octadecadienoic acid	13-OXO-ODE	JHXAZBBVQSRKJR-BSZOFBHHSA-N	6446027	C14765	Lipids	Free Fatty Acid Metabolism, Unsaturated Fatty Acid (UFA) Metabolism, Oxylipin Metabolism	Fatty Acids & Acyls	Monocarboxylic Fatty Acid (MC-FA) (L1), Long-chain Monohydroperoxy Monohydroxy Polyunsaturated Fatty Acid (LC-MHp-MH-PUFA) (L2), Omega-7 Fatty Acid (Om7FA) (L3)	Free Fatty Acids (FFAs)
Platform 2 (Polyphenols and fatty acids)	104	9-Hydroperoxy-10E,12Z,15Z-octadecatrienoic acid	9(S)-HpOTrE	RWKJTIHNYSIIHW-MEBVTJQTSA-N	6450029	NA	Lipids	Free Fatty Acid Metabolism, Unsaturated Fatty Acid (UFA) Metabolism, Oxylipin Metabolism	Fatty Acids & Acyls	Monocarboxylic Fatty Acid (MC-FA) (L1), Long-chain Monohydroperoxy Polyunsaturated Fatty Acid (LC-MHp-PUFA) (L2), Omega-3 Fatty Acid (Om3FA) (L3)	Free Fatty Acids (FFAs)
Platform 2 (Polyphenols and fatty acids)	98	9S-Hydroperoxy-10E,12Z-octadecadienoic acid	9(S)-HPODE	JGUNZIWGNMQSBM-UINYOVNOSA-N	9548877	C14827	Lipids	Free Fatty Acid Metabolism, Unsaturated Fatty Acid (UFA) Metabolism, Oxylipin Metabolism	Fatty Acids & Acyls	Monocarboxylic Fatty Acid (MC-FA) (L1), Long-chain Monohydroperoxy Polyunsaturated Fatty Acid (LC-MHp-PUFA) (L2), Omega-6 Fatty Acid (Om6FA) (L3)	Free Fatty Acids (FFAs)
Platform 2 (Polyphenols and fatty acids)	161	13S-Hydroperoxy-9Z,11E-octadecadienoic acid	13R-HPODE	JDSRHVWSAMTSSN-PIHGWCCBSA-N	5287424	NA	Lipids	Free Fatty Acid Metabolism, Unsaturated Fatty Acid (UFA) Metabolism, Oxylipin Metabolism	Fatty Acids & Acyls	Monocarboxylic Fatty Acid (MC-FA) (L1), Long-chain Monohydroperoxy Polyunsaturated Fatty Acid (LC-MHp-PUFA) (L2), Omega-7 Fatty Acid (Om7FA) (L3)	Free Fatty Acids (FFAs)
Platform 2 (Polyphenols and fatty acids)	163	13-Hydroperoxy-9Z,11E-octadecadienoic acid	13-HpODE	JDSRHVWSAMTSSN-BSZOFBHHSA-N	6437847	C04717	Lipids	Free Fatty Acid Metabolism, Unsaturated Fatty Acid (UFA) Metabolism, Oxylipin Metabolism	Fatty Acids & Acyls	Monocarboxylic Fatty Acid (MC-FA) (L1), Long-chain Monohydroperoxy Polyunsaturated Fatty Acid (LC-MHp-PUFA) (L2), Omega-7 Fatty Acid (Om7FA) (L3)	Free Fatty Acids (FFAs)
Platform 2 (Polyphenols and fatty acids)	97	9S-Hydroxy-10E,12Z,15Z-octadecatrienoic acid	9(S)-HOTrE	RIGGEAZDTKMXSI-MEBVTJQTSA-N	6439873	C16326	Lipids	Free Fatty Acid Metabolism, Unsaturated Fatty Acid (UFA) Metabolism, Oxylipin Metabolism	Fatty Acids & Acyls	Monocarboxylic Fatty Acid (MC-FA) (L1), Long-chain Monohydroxy Polyunsaturated Fatty Acid (LC-MH-PUFA) (L2), Omega-3 Fatty Acid (Om3FA) (L3)	Free Fatty Acids (FFAs)
Platform 2 (Polyphenols and fatty acids)	160	13S-Hydroxy-9Z,11E,15Z-octadecatrienoic acid	13S-HOTrE	KLLGGGQNRTVBSU-FQSPHKRJSA-N	16061072	C16316	Lipids	Free Fatty Acid Metabolism, Unsaturated Fatty Acid (UFA) Metabolism, Oxylipin Metabolism	Fatty Acids & Acyls	Monocarboxylic Fatty Acid (MC-FA) (L1), Long-chain Monohydroxy Polyunsaturated Fatty Acid (LC-MH-PUFA) (L2), Omega-3 Fatty Acid (Om3FA) (L3)	Free Fatty Acids (FFAs)
Platform 2 (Polyphenols and fatty acids)	102	9-Oxo-10E,12Z-octadecadienoic acid	9-OxoODE	LUZSWWYKKLTDHU-ZJHFMPGASA-N	9839084	C14766	Lipids	Free Fatty Acid Metabolism, Unsaturated Fatty Acid (UFA) Metabolism, Oxylipin Metabolism	Fatty Acids & Acyls	Monocarboxylic Fatty Acid (MC-FA) (L1), Long-chain Monohydroxy Polyunsaturated Fatty Acid (LC-MH-PUFA) (L2), Omega-6 Fatty Acid (Om6FA) (L3)	Free Fatty Acids (FFAs)
Platform 2 (Polyphenols and fatty acids)	103	9-Oxo-10(E),12(E)-octadecadienoic acid	9-oxo-10E,12E-ODE	LUZSWWYKKLTDHU-SIGMCMEVSA-N	5283011	NA	Lipids	Free Fatty Acid Metabolism, Unsaturated Fatty Acid (UFA) Metabolism, Oxylipin Metabolism	Fatty Acids & Acyls	Monocarboxylic Fatty Acid (MC-FA) (L1), Long-chain Monohydroxy Polyunsaturated Fatty Acid (LC-MH-PUFA) (L2), Omega-6 Fatty Acid (Om6FA) (L3)	Free Fatty Acids (FFAs)
Platform 2 (Polyphenols and fatty acids)	198	(9E,11Z)-8-Hydroxyoctadeca-9,11-dienoic acid	NA	NTYHQKJCCYNCMG-LMEHAKNHSA-N	45359531	NA	Lipids	Free Fatty Acid Metabolism, Unsaturated Fatty Acid (UFA) Metabolism, Oxylipin Metabolism	Fatty Acids & Acyls	Monocarboxylic Fatty Acid (MC-FA) (L1), Long-chain Monohydroxy Polyunsaturated Fatty Acid (LC-MH-PUFA) (L2), Omega-7 Fatty Acid (Om7FA) (L3)	Free Fatty Acids (FFAs)
Platform 2 (Polyphenols and fatty acids)	159	16-Hydroxyhexadecanoic acid	Juniperic acid	UGAGPNKCDRTDHP-UHFFFAOYSA-N	10466	C18218	Lipids	Free Fatty Acid Metabolism, Saturated Fatty Acid (SFA) Metabolism, Oxylipin Metabolism	Fatty Acids & Acyls	Monocarboxylic Fatty Acid (MC-FA) (L1), Long-chain Monohydroxy Saturated Fatty Acid (LC-MH-SFA) (L2)	Free Fatty Acids (FFAs)
Platform 1 (Lipids)	412	FA 16:1 (palmitoleic acid)	Palmitoleic Acid	SECPZKHBENQXJG-FPLPWBNLSA-N	445638	C08362	Lipids	Free Fatty Acid Metabolism, Unsaturated Fatty Acid (UFA) Metabolism	Fatty Acids & Acyls	Monocarboxylic Fatty Acid (MC-FA) (L1), Long-chain Monounsaturated Fatty Acid (LC-MUFA) (L2), Omega-7 Fatty Acid (Om7FA) (L3)	Free Fatty Acids (FFAs)
Platform 1 (Lipids)	414	FA 17:1	Heptadecenoic acid	QSBYPNXLFMSGKH-UHFFFAOYSA-N	3014063	C16536	Lipids	Free Fatty Acid Metabolism, Unsaturated Fatty Acid (UFA) Metabolism	Fatty Acids & Acyls	Monocarboxylic Fatty Acid (MC-FA) (L1), Long-chain Monounsaturated Fatty Acid (LC-MUFA) (L2), Omega-9 Fatty Acid (Om9FA) (L3)	Free Fatty Acids (FFAs)
Platform 1 (Lipids)	415	FA 18:1 (oleic acid)	Oleic Acid, FA 18:1	ZQPPMHVWECSIRJ-KTKRTIGZSA-N	445639	C00712	Lipids	Free Fatty Acid Metabolism, Unsaturated Fatty Acid (UFA) Metabolism	Fatty Acids & Acyls	Monocarboxylic Fatty Acid (MC-FA) (L1), Long-chain Monounsaturated Fatty Acid (LC-MUFA) (L2), Omega-9 Fatty Acid (Om9FA) (L3)	Free Fatty Acids (FFAs)
Platform 1 (Lipids)	418	FA 20:1 (eicosenoic acid)	Eicosenoic Acid, Gondoic Acid	BITHHVVYSMSWAG-KTKRTIGZSA-N	5282768	C16526	Lipids	Free Fatty Acid Metabolism, Unsaturated Fatty Acid (UFA) Metabolism	Fatty Acids & Acyls	Monocarboxylic Fatty Acid (MC-FA) (L1), Long-chain Monounsaturated Fatty Acid (LC-MUFA) (L2), Omega-9 Fatty Acid (Om9FA) (L3)	Free Fatty Acids (FFAs)
Platform 2 (Polyphenols and fatty acids)	192	(Z)-9,12,13-Trihydroxyoctadec-15-enoic acid	NA	DNWUYCUUEGGVPR-CLTKARDFSA-N	24066906	NA	Lipids	Free Fatty Acid Metabolism, Unsaturated Fatty Acid (UFA) Metabolism, Oxylipin Metabolism	Fatty Acids & Acyls	Monocarboxylic Fatty Acid (MC-FA) (L1), Long-chain Polyhydroxy Monounsaturated Fatty Acid (LC-PH-MUFA) (L2), Omega-3 Fatty Acid (Om3FA) (L3)	Free Fatty Acids (FFAs)
Platform 2 (Polyphenols and fatty acids)	100	9,10-Dihydroxy-12Z-octadecenoic acid	9,10-DiHOME	XEBKSQSGNGRGDW-CJWPDFJNSA-N	25320858	C14828	Lipids	Free Fatty Acid Metabolism, Unsaturated Fatty Acid (UFA) Metabolism, Oxylipin Metabolism	Fatty Acids & Acyls	Monocarboxylic Fatty Acid (MC-FA) (L1), Long-chain Polyhydroxy Monounsaturated Fatty Acid (LC-PH-MUFA) (L2), Omega-6 Fatty Acid (Om6FA) (L3)	Free Fatty Acids (FFAs)
Platform 2 (Polyphenols and fatty acids)	209	(12Z)-9,10,11-Trihydroxyoctadec-12-enoic acid	NA	JHGVFGJXFVIYSM-XFXZXTDPSA-N	75536014	NA	Lipids	Free Fatty Acid Metabolism, Unsaturated Fatty Acid (UFA) Metabolism, Oxylipin Metabolism	Fatty Acids & Acyls	Monocarboxylic Fatty Acid (MC-FA) (L1), Long-chain Polyhydroxy Monounsaturated Fatty Acid (LC-PH-MUFA) (L2), Omega-6 Fatty Acid (Om6FA) (L3)	Free Fatty Acids (FFAs)
Platform 2 (Polyphenols and fatty acids)	164	12,13-Dihydroxy-9Z-octadecenoic acid	12,13-DiHOME	CQSLTKIXAJTQGA-GJGKEFFFSA-N	10236635	NA	Lipids	Free Fatty Acid Metabolism, Unsaturated Fatty Acid (UFA) Metabolism, Oxylipin Metabolism	Fatty Acids & Acyls	Monocarboxylic Fatty Acid (MC-FA) (L1), Long-chain Polyhydroxy Monounsaturated Fatty Acid (LC-PH-MUFA) (L2), Omega-9 Fatty Acid (Om9FA) (L3)	Free Fatty Acids (FFAs)
Platform 2 (Polyphenols and fatty acids)	196	(9Z)-5,8,11-Trihydroxyoctadec-9-enoic acid	NA	FITAKYVPWCVTII-QBFSEMIESA-N	24096399	NA	Lipids	Free Fatty Acid Metabolism, Unsaturated Fatty Acid (UFA) Metabolism, Oxylipin Metabolism	Fatty Acids & Acyls	Monocarboxylic Fatty Acid (MC-FA) (L1), Long-chain Polyhydroxy Monounsaturated Fatty Acid (LC-PH-MUFA) (L2), Omega-9 Fatty Acid (Om9FA) (L3)	Free Fatty Acids (FFAs)
Platform 2 (Polyphenols and fatty acids)	210	(12Z,15Z)-9,10,11-Trihydroxyoctadeca-12,15-dienoic acid	NA	KFINXCASWPGHEW-UYOLCUGSSA-N	56671117	NA	Lipids	Free Fatty Acid Metabolism, Unsaturated Fatty Acid (UFA) Metabolism, Oxylipin Metabolism	Fatty Acids & Acyls	Monocarboxylic Fatty Acid (MC-FA) (L1), Long-chain Polyhydroxy Polyunsaturated Fatty Acid (LC-PH-PUFA) (L2), Omega-3 Fatty Acid (Om3FA) (L3)	Free Fatty Acids (FFAs)
Platform 2 (Polyphenols and fatty acids)	211	(10E,15Z)-9,12,13-Trihydroxyoctadeca-10,15-dienoic acid	NA	MKYUCBXUUSZMQB-MKZMYESJSA-N	44559173	NA	Lipids	Free Fatty Acid Metabolism, Unsaturated Fatty Acid (UFA) Metabolism, Oxylipin Metabolism	Fatty Acids & Acyls	Monocarboxylic Fatty Acid (MC-FA) (L1), Long-chain Polyhydroxy Punsaturated Fatty Acid (LC-PH-PUFA) (L2), Omega-3 Fatty Acid (Om3FA) (L3)	Free Fatty Acids (FFAs)
Platform 2 (Polyphenols and fatty acids)	197	(9Z,12E)-15,16-Dihydroxyoctadeca-9,12-dienoic acid	NA	LKLLJYJTYPVCID-JVVXYUKTSA-N	45783236	NA	Lipids	Free Fatty Acid Metabolism, Unsaturated Fatty Acid (UFA) Metabolism, Oxylipin Metabolism	Fatty Acids & Acyls	Monocarboxylic Fatty Acid (MC-FA) (L1), Long-chain Polyhydroxy Punsaturated Fatty Acid (LC-PH-PUFA) (L2), Omega-6 Fatty Acid (Om6FA) (L3)	Free Fatty Acids (FFAs)
Platform 3 (Primary Metabolites)	292	linolenic acid	FA 18:3, FA 18:3 (linolenic acid), Linolenic Acid	DTOSIQBPPRVQHS-PDBXOOCHSA-N	5280934	C06427	Lipids	Free Fatty Acid Metabolism, Unsaturated Fatty Acid (UFA) Metabolism	Fatty Acids & Acyls	Monocarboxylic Fatty Acid (MC-FA) (L1), Long-chain Polyunsaturated Fatty Acid (LC-PUFA) (L2), Omega-3 Fatty Acid (Om3FA) (L3)	Free Fatty Acids (FFAs)
Platform 1 (Lipids)	416	FA 18:2 (linoleic acid)	Isolinoleic Acid	JBYXPOFIGCOSSB-XBLVEGMJSA-N	5282796	C01595	Lipids	Free Fatty Acid Metabolism, Unsaturated Fatty Acid (UFA) Metabolism	Fatty Acids & Acyls	Monocarboxylic Fatty Acid (MC-FA) (L1), Long-chain Polyunsaturated Fatty Acid (LC-PUFA) (L2), Omega-6 Fatty Acid (Om6FA) (L3)	Free Fatty Acids (FFAs)
Platform 2 (Polyphenols and fatty acids)	91	cis-11,14-Eicosadienoic acid	Eicosadienoic acid	XSXIVVZCUAHUJO-HZJYTTRNSA-N	6439848	C16525	Lipids	Free Fatty Acid Metabolism, Unsaturated Fatty Acid (UFA) Metabolism	Fatty Acids & Acyls	Monocarboxylic Fatty Acid (MC-FA) (L1), Long-chain Polyunsaturated Fatty Acid (LC-PUFA) (L2), Omega-6 Fatty Acid (Om6FA) (L3)	Free Fatty Acids (FFAs)
Platform 3 (Primary Metabolites)	293	linoleic acid	FA 18:2	OYHQOLUKZRVURQ-HZJYTTRNSA-N	5280450	C01595	Lipids	Free Fatty Acid Metabolism, Unsaturated Fatty Acid (UFA) Metabolism	Fatty Acids & Acyls	Monocarboxylic Fatty Acid (MC-FA) (L1), Long-chain Polyunsaturated Fatty Acid (LC-PUFA) (L2), Omega-6 Fatty Acid (Om6FA) (L3)	Free Fatty Acids (FFAs)
Platform 1 (Lipids)	413	FA 17:0 (margaric acid)	Heptadecanoic Acid	KEMQGTRYUADPNZ-UHFFFAOYSA-N	10465	NA	Lipids	Free Fatty Acid Metabolism, Saturated Fatty Acid (SFA) Metabolism	Fatty Acids & Acyls	Monocarboxylic Fatty Acid (MC-FA) (L1), Long-chain Saturated Fatty Acid (LC-SFA) (L2)	Free Fatty Acids (FFAs)
Platform 1 (Lipids)	419	FA 21:0	Heneicosanoic acid, Heneicosylic Acid	CKDDRHZIAZRDBW-UHFFFAOYSA-N	16898	NA	Lipids	Free Fatty Acid Metabolism, Saturated Fatty Acid (SFA) Metabolism	Fatty Acids & Acyls	Monocarboxylic Fatty Acid (MC-FA) (L1), Long-chain Saturated Fatty Acid (LC-SFA) (L2)	Free Fatty Acids (FFAs)
Platform 2 (Polyphenols and fatty acids)	165	10-Hydroxy-2-decenoic acid	Royal jelly acid	QHBZHVUGQROELI-SOFGYWHQSA-N	5312738	NA	Lipids	Free Fatty Acid Metabolism, Unsaturated Fatty Acid (UFA) Metabolism, Oxylipin Metabolism	Fatty Acids & Acyls	Monocarboxylic Fatty Acid (MC-FA) (L1), Medium-chain Monohydroxy Monounsaturated Fatty Acid (MC-MH-MUFA) (L2), alpha/beta Unsaturated Fatty Acid (abUFA) (L3)	Free Fatty Acids (FFAs)
Platform 2 (Polyphenols and fatty acids)	166	10-Hendecenoic acid	Undecylenic acid	FRPZMMHWLSIFAZ-UHFFFAOYSA-N	5634	C13910	Lipids	Free Fatty Acid Metabolism, Unsaturated Fatty Acid (UFA) Metabolism	Fatty Acids & Acyls	Monocarboxylic Fatty Acid (MC-FA) (L1), Medium-chain Monounsaturated Fatty Acid (MC-MUFA) (L2), Omega-1 Fatty Acid (Om1FA) (L3)	Free Fatty Acids (FFAs)
Platform 3 (Primary Metabolites)	297	lauric acid	C12:0	POULHZVOKOAJMA-UHFFFAOYSA-N	3893	C02679	Lipids	Free Fatty Acid Metabolism, Saturated Fatty Acid (SFA) Metabolism	Fatty Acids & Acyls	Monocarboxylic Fatty Acid (MC-FA) (L1), Medium-chain Saturated Fatty Acid (MC-SFA) (L2)	Free Fatty Acids (FFAs)
Platform 3 (Primary Metabolites)	343	caproic acid	Hexanoic acid	FUZZWVXGSFPDMH-UHFFFAOYSA-N	8892	C01585	Lipids	Free Fatty Acid Metabolism, Saturated Fatty Acid (SFA) Metabolism	Fatty Acids & Acyls	Monocarboxylic Fatty Acid (MC-FA) (L1), Medium-chain Saturated Fatty Acid (MC-SFA) (L2)	Free Fatty Acids (FFAs)
Platform 3 (Primary Metabolites)	344	capric acid	Decanoic acid	GHVNFZFCNZKVNT-UHFFFAOYSA-N	2969	C01571	Lipids	Free Fatty Acid Metabolism, Saturated Fatty Acid (SFA) Metabolism	Fatty Acids & Acyls	Monocarboxylic Fatty Acid (MC-FA) (L1), Medium-chain Saturated Fatty Acid (MC-SFA) (L2)	Free Fatty Acids (FFAs)
Platform 1 (Lipids)	420	FA 22:0 (behenic acid)	Docosanoic acid, Behenic Acid	UKMSUNONTOPOIO-UHFFFAOYSA-N	8215	C08281	Lipids	Free Fatty Acid Metabolism, Saturated Fatty Acid (SFA) Metabolism	Fatty Acids & Acyls	Monocarboxylic Fatty Acid (MC-FA) (L1), Very-Long-chain Saturated Fatty Acid (VLC-SFA) (L2)	Free Fatty Acids (FFAs)
Platform 1 (Lipids)	421	FA 23:0	Tricosanoic Acid, Tricosylic Acid	XEZVDURJDFGERA-UHFFFAOYSA-N	17085	NA	Lipids	Free Fatty Acid Metabolism, Saturated Fatty Acid (SFA) Metabolism	Fatty Acids & Acyls	Monocarboxylic Fatty Acid (MC-FA) (L1), Very-Long-chain Saturated Fatty Acid (VLC-SFA) (L2)	Free Fatty Acids (FFAs)
Platform 1 (Lipids)	422	FA 24:0 (lignoceric acid)	Tetracosanoic Acid, Lignoceric Acid	QZZGJDVWLFXDLK-UHFFFAOYSA-N	11197	C08320	Lipids	Free Fatty Acid Metabolism, Saturated Fatty Acid (SFA) Metabolism	Fatty Acids & Acyls	Monocarboxylic Fatty Acid (MC-FA) (L1), Very-Long-chain Saturated Fatty Acid (VLC-SFA) (L2)	Free Fatty Acids (FFAs)
Platform 1 (Lipids)	423	FA 25:0	Pentacosanoic Acid, Hyenic Acid	MWMPEAHGUXCSMY-UHFFFAOYSA-N	10468	NA	Lipids	Free Fatty Acid Metabolism, Saturated Fatty Acid (SFA) Metabolism	Fatty Acids & Acyls	Monocarboxylic Fatty Acid (MC-FA) (L1), Very-Long-chain Saturated Fatty Acid (VLC-SFA) (L2)	Free Fatty Acids (FFAs)
Platform 1 (Lipids)	424	FA 26:0	Hexacosanoic Acid, Cerotic Acid	XMHIUKTWLZUKEX-UHFFFAOYSA-N	10469	C21931	Lipids	Free Fatty Acid Metabolism, Saturated Fatty Acid (SFA) Metabolism	Fatty Acids & Acyls	Monocarboxylic Fatty Acid (MC-FA) (L1), Very-Long-chain Saturated Fatty Acid (VLC-SFA) (L2)	Free Fatty Acids (FFAs)
Platform 1 (Lipids)	425	FA 27:0	Heptacosanoic Acid, Carboceric Acid	VXZBFBRLRNDJCS-UHFFFAOYSA-N	23524	NA	Lipids	Free Fatty Acid Metabolism, Saturated Fatty Acid (SFA) Metabolism	Fatty Acids & Acyls	Monocarboxylic Fatty Acid (MC-FA) (L1), Very-Long-chain Saturated Fatty Acid (VLC-SFA) (L2)	Free Fatty Acids (FFAs)
Platform 1 (Lipids)	426	FA 28:0 (montanic acid)	Octacosanoic Acid, Montanic Acid	UTOPWMOLSKOLTQ-UHFFFAOYSA-N	10470	C21933	Lipids	Free Fatty Acid Metabolism, Saturated Fatty Acid (SFA) Metabolism	Fatty Acids & Acyls	Monocarboxylic Fatty Acid (MC-FA) (L1), Very-Long-chain Saturated Fatty Acid (VLC-SFA) (L2)	Free Fatty Acids (FFAs)
Platform 1 (Lipids)	427	FA 30:0	Triacontanoic Acid, Melissic Acid	VHOCUJPBKOZGJD-UHFFFAOYSA-N	10471	NA	Lipids	Free Fatty Acid Metabolism, Saturated Fatty Acid (SFA) Metabolism	Fatty Acids & Acyls	Monocarboxylic Fatty Acid (MC-FA) (L1), Very-Long-chain Saturated Fatty Acid (VLC-SFA) (L2)	Free Fatty Acids (FFAs)
Platform 2 (Polyphenols and fatty acids)	60	Glycerophosphocholine	sn-Glycero-3-phosphocholine	SUHOQUVVVLNYQR-MRVPVSSYSA-N	657272	C00670	Carbohydrates	Sugar Metabolism, Sugar (Mono- and di-saccharide) Metabolism, Glycolysis/Gluconeogenesis, Phospholipid Metabolism, Glyceride Metabolism	Sugar Alcohol, Organic Phosphate	Monosaccharide Sugar Alcohol, C3 Sugar Alcohol
Platform 3 (Primary Metabolites)	311	glycerol-alpha-phosphate	Glycerol 3-phosphate	AWUCVROLDVIAJX-UHFFFAOYSA-N	754	C03189	Carbohydrates	Sugar Metabolism, Sugar (Mono- and di-saccharide) Metabolism, Glycolysis/Gluconeogenesis, Phospholipid Metabolism, Glyceride Metabolism	Sugar Alcohol, Organic Phosphate	Monosaccharide Sugar Alcohol, C3 Sugar Alcohol
Platform 3 (Primary Metabolites)	312	glycerol-3-galactoside	Galactosylglycerol	NHJUPBDCSOGIKX-NTXXKDEISA-N	16048618	C05401	Carbohydrates	Sugar Metabolism, Sugar (Mono- and di-saccharide) Metabolism, Glyceride Metabolism, Glycoglycerolipid Metabolism	Sugar Alcohol	Monosaccharide Sugar Alcohol, C3 Sugar Alcohol
Platform 3 (Primary Metabolites)	313	glycerol	Glycerin	PEDCQBHIVMGVHV-UHFFFAOYSA-N	753	C00116	Carbohydrates	Sugar Metabolism, Sugar (Mono- and di-saccharide) Metabolism, Glyceride Metabolism, Glycoglycerolipid Metabolism, Phospholipid Metabolism	Sugar Alcohol	Monosaccharide Sugar Alcohol, C3 Sugar Alcohol
Platform 3 (Primary Metabolites)	242	threitol	NA	UNXHWFMMPAWVPI-QWWZWVQMSA-N	169019	C16884	Carbohydrates	Sugar Alcohol Metabolism, Sugar (Mono- and di-saccharide) Metabolism, Sugar Metabolism	Sugar Alcohol	Monosaccharide Sugar Alcohol, C4 Sugar Alcohol
Platform 3 (Primary Metabolites)	270	pentitol	Ribitol	HEBKCHPVOIAQTA-UHFFFAOYSA-N	827	D00061	Carbohydrates	Sugar Metabolism, Sugar (Mono- and di-saccharide) Metabolism, Sugar Alcohol Metabolism	Sugar Alcohol	Monosaccharide Sugar Alcohol, C5 Sugar Alcohol
Platform 3 (Primary Metabolites)	289	lyxitol	Arabinitol	HEBKCHPVOIAQTA-IMJSIDKUSA-N	439255	C00532	Carbohydrates	Sugar Metabolism, Sugar (Mono- and di-saccharide) Metabolism, Sugar Alcohol Metabolism	Sugar Alcohol	Monosaccharide Sugar Alcohol, C5 Sugar Alcohol
Platform 3 (Primary Metabolites)	353	arabitol	D-Lyxitol	HEBKCHPVOIAQTA-QWWZWVQMSA-N	94154	C01904	Carbohydrates	Sugar Metabolism, Sugar (Mono- and di-saccharide) Metabolism, Sugar Alcohol Metabolism	Sugar Alcohol	Monosaccharide Sugar Alcohol, C5 Sugar Alcohol
Platform 3 (Primary Metabolites)	224	xylitol	NA	HEBKCHPVOIAQTA-NGQZWQHPSA-N	6912	C00379	Carbohydrates	Sugar Metabolism, Sugar (Mono- and di-saccharide) Metabolism, Sugar Alcohol Metabolism	Sugar Alcohol	Monosaccharide Sugar Alcohol, C5 Sugar Alcohol, Alditol
Platform 2 (Polyphenols and fatty acids)	52	L-Fucitol	6-deoxy-L-galactitol	SKCKOFZKJLZSFA-KCDKBNATSA-N	445724	NA	Carbohydrates	Sugar Metabolism, Sugar (Mono- and di-saccharide) Metabolism, Sugar Alcohol Metabolism	Sugar Alcohol	Monosaccharide Sugar Alcohol, C6 Sugar Alcohol
Platform 3 (Primary Metabolites)	249	sorbitol	Glucitol, D-Sorbitol	FBPFZTCFMRRESA-JGWLITMVSA-N	5780	C00794	Carbohydrates	Sugar Metabolism, Sugar (Mono- and di-saccharide) Metabolism, Sugar Alcohol Metabolism	Sugar Alcohol	Monosaccharide Sugar Alcohol, C6 Sugar Alcohol
Platform 3 (Primary Metabolites)	339	conduritol-beta-epoxide	1-L-1,2-anhydro-myo-inositol	ZHMWOVGZCINIHW-SPHYCDKFSA-N	9989541	NA	Carbohydrates	Sugar Metabolism, Sugar (Mono- and di-saccharide) Metabolism, Sugar Alcohol Metabolism	Sugar Alcohol	Monosaccharide Sugar Alcohol, C6 Sugar Alcohol Epoxide, Sugar Alcohol Epoxide
Platform 3 (Primary Metabolites)	377	1,2-anhydro-myo-inositol	Conduritol B-epoxide	ZHMWOVGZCINIHW-FTYOSCRSSA-N	119054	NA	Carbohydrates	Sugar Metabolism, Sugar (Mono- and di-saccharide) Metabolism, Sugar Alcohol Metabolism	Sugar Alcohol	Monosaccharide Sugar Alcohol, C6 Sugar Alcohol Epoxide, Sugar Alcohol Epoxide
Platform 2 (Polyphenols and fatty acids)	42	myo-Inositol	Inositol	CDAISMWEOUEBRE-GPIVLXJGSA-N	892	C00137	Carbohydrates	Sugar Metabolism, Sugar (Mono- and di-saccharide) Metabolism, Sugar Alcohol Metabolism	Sugar Alcohol	Monosaccharide Sugar Alcohol, C6 Sugar Alcohol, Cyclitol
Platform 3 (Primary Metabolites)	265	pinitol	NA	DSCFFEYYQKSRSV-FEPQRWDDSA-N	164619	C03844	Carbohydrates	Sugar Metabolism, Sugar (Mono- and di-saccharide) Metabolism, Sugar Alcohol Metabolism	Sugar Alcohol	Monosaccharide Sugar Alcohol, C6 Sugar Alcohol, Cyclitol
Platform 3 (Primary Metabolites)	277	myo-inositol	inositol, levoinositol	CDAISMWEOUEBRE-UHFFFAOYSA-N	892	C00137	Carbohydrates	Sugar Metabolism, Sugar (Mono- and di-saccharide) Metabolism, Sugar Alcohol Metabolism	Sugar Alcohol	Monosaccharide Sugar Alcohol, C6 Sugar Alcohol, Cyclitol
Platform 3 (Primary Metabolites)	360	6-deoxyglucitol	D-quinovitol	SKCKOFZKJLZSFA-JGWLITMVSA-N	151266	NA	Carbohydrates	Sugar Metabolism, Sugar (Mono- and di-saccharide) Metabolism, Sugar Alcohol Metabolism	Sugar Alcohol	Monosaccharide Sugar Alcohol, C6 Sugar Alcohol, Deoxy Sugar Alcohol
Platform 3 (Primary Metabolites)	268	perseitol	Perseit	OXQKEKGBFMQTML-RYRJNEICSA-N	441436	C08255	Carbohydrates	Sugar Metabolism, Sugar (Mono- and di-saccharide) Metabolism, Sugar Alcohol Metabolism	Sugar Alcohol	Monosaccharide Sugar Alcohol, C7 Sugar Alcohol
Platform 3 (Primary Metabolites)	334	erythritol	Erythrol	UNXHWFMMPAWVPI-ZXZARUISSA-N	222285	C00503	Carbohydrates	Sugar Metabolism, Sugar (Mono- and di-saccharide) Metabolism, Sugar Alcohol Metabolism	Sugar Alcohol	Monosaccharide Sugar Alcohol, Sugar Alcohol, C4 Sugar Alcohol
Platform 3 (Primary Metabolites)	337	deoxypentitol	5-Deoxyribitol	FJGNTEKSQVNVTJ-UHFFFAOYSA-N	270738	NA	Carbohydrates	Sugar Metabolism, Sugar (Mono- and di-saccharide) Metabolism, Sugar Alcohol Metabolism	Sugar Alcohol	Monosaccharide Sugar Alcohol, Sugar Alcohol, C5 Sugar Alcohol
Platform 2 (Polyphenols and fatty acids)	207	(2E)-3,4,7-Trimethylocta-2,6-dien-1-ol	4-methylgeraniol	ZPIKDJYPRJOHLN-YRNVUSSQSA-N	14526717	NA	Lipids	Terpenoid Metabolism, Tetraterpenoid (Carotenoid & Apocarotenoid) Metabolism, Plant Hormone Metabolism, Abscisic Acid Metabolism	Terpenoid/Isoprenoid	Monoterpenoid (L1), Linear Monoterpenoid (L2), Monoterpenoid Aglycone (L3)	Terpenoids
Platform 2 (Polyphenols and fatty acids)	199	(5S)-5-(1-Hydroxy-1-methylethyl)-2-methyl-2-cyclohexen-1-one	NA	DJOOMNLGIUGRKD-QMMMGPOBSA-N	12736466	NA	Lipids	Terpenoid Metabolism, Tetraterpenoid (Carotenoid & Apocarotenoid) Metabolism, Plant Hormone Metabolism, Abscisic Acid Metabolism	Terpenoid/Isoprenoid	Monoterpenoid (L1), Monocyclic Monoterpenoid (L2)	Terpenoids
Platform 2 (Polyphenols and fatty acids)	118	4-Hydroxy-4-[(E)-3-hydroxybut-1-enyl]-3,5,5-trimethylcyclohex-2-en-1-one	Vomifoliol	KPQMCAKZRXOZLB-AATRIKPKSA-N	5280654	C04166	Lipids	Terpenoid Metabolism, Tetraterpenoid (Carotenoid & Apocarotenoid) Metabolism, Plant Hormone Metabolism, Abscisic Acid Metabolism	Terpenoid/Isoprenoid	Monoterpenoid (L1), Monocyclic Monoterpenoid (L2), Monoterpenoid Aglycone (L3)	Terpenoids
Platform 2 (Polyphenols and fatty acids)	177	1,2,3,3-Tetramethylbicyclo[2.2.1]heptan-2-ol	NA	AJVKAPQCJKEUSG-UHFFFAOYSA-N	12648890	NA	Lipids	Terpenoid Metabolism, Tetraterpenoid (Carotenoid & Apocarotenoid) Metabolism, Plant Hormone Metabolism, Abscisic Acid Metabolism	Terpenoid/Isoprenoid	Monoterpenoid (L1), Polycyclic Monoterpenoid (L2)	Terpenoids
Platform 2 (Polyphenols and fatty acids)	219	.alpha.,.beta.-Thujone	Thujone	USMNOWBWPHYOEA-VWHDNNRLSA-N	10931629	C09906	Lipids	Terpenoid Metabolism, Tetraterpenoid (Carotenoid & Apocarotenoid) Metabolism, Plant Hormone Metabolism, Abscisic Acid Metabolism	Terpenoid/Isoprenoid	Monoterpenoid (L1), Polycyclic Monoterpenoid (L2), Monoterpenoid Aglycone (L3)	Terpenoids
Platform 2 (Polyphenols and fatty acids)	220	.alpha.-Pinene oxide	alpha-Pinene epoxide	NQFUSWIGRKFAHK-UHFFFAOYSA-N	91508	C02759	Lipids	Terpenoid Metabolism, Tetraterpenoid (Carotenoid & Apocarotenoid) Metabolism, Plant Hormone Metabolism, Abscisic Acid Metabolism	Terpenoid/Isoprenoid	Monoterpenoid (L1), Polycyclic Monoterpenoid (L2), Monoterpenoid Aglycone (L3)	Terpenoids
Platform 2 (Polyphenols and fatty acids)	57	Harpagoside	NA	KVRQGMOSZKPBNS-FMHLWDFHSA-N	5281542	C09783	Lipids	Terpenoid Metabolism, Tetraterpenoid (Carotenoid & Apocarotenoid) Metabolism, Plant Hormone Metabolism, Abscisic Acid Metabolism	Terpenoid/Isoprenoid	Monoterpenoid (L1), Polycyclic Monoterpenoid (L2), Monoterpenoid Glycone (L3)	Terpenoids
Platform 3 (Primary Metabolites)	291	loganin	Loganoside	AMBQHHVBBHTQBF-UOUCRYGSSA-N	87691	C01433	Lipids	Terpenoid Metabolism, Tetraterpenoid (Carotenoid & Apocarotenoid) Metabolism, Plant Hormone Metabolism, Abscisic Acid Metabolism	Terpenoid/Isoprenoid	Monoterpenoid (L1), Polycyclic Monoterpenoid (L2), Monoterpenoid Glycone (L3)	Terpenoids
Platform 2 (Polyphenols and fatty acids)	37	N-Benzyl-N,N-dimethyl-1-hexadecanaminium cation	Cetalkonium	QDYLMAYUEZBUFO-UHFFFAOYSA-N	31203	NA	Unclassified	NA	NA	NA
Platform 2 (Polyphenols and fatty acids)	77	Diethyltoluamide	DEET	MMOXZBCLCQITDF-UHFFFAOYSA-N	4284	C10935	Unclassified	NA	NA	NA
Platform 2 (Polyphenols and fatty acids)	94	Benzyldimethyltetradecylammonium cation	Zephiramine cation	WNBGYVXHFTYOBY-UHFFFAOYSA-N	8756	NA	Unclassified	NA	NA	NA
Platform 2 (Polyphenols and fatty acids)	105	9-Fluorenone	NA	YLQWCDOCJODRMT-UHFFFAOYSA-N	10241	C06712	Unclassified	NA	NA	NA
Platform 2 (Polyphenols and fatty acids)	109	6-Thioinosine	Thioinosine	NKGPJODWTZCHGF-DEGSGYPDSA-N	3005838	NA	Unclassified	NA	NA	NA
Platform 2 (Polyphenols and fatty acids)	128	3,4,5-Trimethacarb	3,4,5-Trimethylphenyl methylcarbamate	AUQAUAIUNJIIEP-UHFFFAOYSA-N	17592	NA	Unclassified	NA	NA	NA
Platform 2 (Polyphenols and fatty acids)	130	3,4-Methylenedioxy-.alpha.-pyrrolidinobutyrophenone	NA	OLVLMDVPMCIBQW-UHFFFAOYSA-N	NA	NA	Unclassified	NA	NA	NA
Platform 2 (Polyphenols and fatty acids)	137	3-Cyclohexyl-3-oxopropanoic acid ethyl ester	NA	ASYASKBLHYSMEG-UHFFFAOYSA-N	266327	NA	Unclassified	NA	NA	NA
Platform 2 (Polyphenols and fatty acids)	155	2-Adamantanone	Adamantanone	IYKFYARMMIESOX-UHFFFAOYSA-N	64151	NA	Unclassified	NA	NA	NA
Platform 2 (Polyphenols and fatty acids)	170	1,5-Dihydroxynaphthalene	1,5-Naphthalenediol	BOKGTLAJQHTOKE-UHFFFAOYSA-N	6749	NA	Unclassified	NA	NA	NA
Platform 2 (Polyphenols and fatty acids)	186	1-O-((2E,4E)-5-((1R,3S,5S,8S)-3,8-Dihydroxy-1,5-dimethyl-6-oxabicyclo[3.2.1]octan-8-yl)-3-methylpenta-2,4-dienoyl)-.beta.-D-glucopyranose	NA	NA	NA	NA	Unclassified	NA	NA	NA
Platform 2 (Polyphenols and fatty acids)	191	1-(2-Hydroxyethyl)pyrazole	2-(1H-pyrazol-1-yl)ethanol	DXFBKDSQMUFYLD-UHFFFAOYSA-N	237031	NA	Unclassified	NA	NA	NA
Platform 2 (Polyphenols and fatty acids)	206	(2R)-2-(4-Isobutylphenyl)-N-mesylpropionamide	reparixin	KQDRVXQXKZXMHP-LLVKDONJSA-N	9838712	NA	Unclassified	NA	NA	NA
Platform 3 (Primary Metabolites)	266	phosphate	Phosphoric Acid	NBIIXXVUZAFLBC-UHFFFAOYSA-N	1004	C00009	Unclassified	NA	NA	NA
Platform 3 (Primary Metabolites)	286	maleimide	2,5-Pyrroledione	PEEHTFAAVSWFBL-UHFFFAOYSA-N	10935	C07272	Unclassified	NA	NA	NA
Platform 3 (Primary Metabolites)	250	sinigrin	Allylglucosinalate	QKFAFSGJTMHRRY-OCFLFPRFSA-M	23682211	C08427	Carbohydrates	Sugar Metabolism, Sugar (Mono- and di-saccharide) Metabolism, Glucosinolate Metabolism, Amino Acid Metabolism, Non-aromatic Amino Acid Metabolism	Glucosinolate, S-Glycoside	Non-aromatic Glucosinolate
Platform 3 (Primary Metabolites)	272	ornithine	NA	AHLPHDHHMVZTML-BYPYZUCNSA-N	88747248	C00077	Peptides & Amino Acids	Nitrogen Metabolism, Urea Cycle, Amino Acid Metabolism, Non-Aromatic Amino Acid Metabolism	Amino Acid, Amine, Biogenic Amine	Non-proteinogenic Amino Acid, Diamine, Monocarboxylic Acid
Platform 3 (Primary Metabolites)	271	oxoproline	Pyroglutamate	ODHCTXKNWHHXJC-VKHMYHEASA-N	7405	C01879	Peptides & Amino Acids	Amino Acid Metabolism, Non-aromatic Amino Acid Metabolism, Glutathione Metabolism	Amino Acid, Amide, Carboxylic Acid	Non-proteinogenic Amino Acid, Lactam, Gamma-Lactam
Platform 2 (Polyphenols and fatty acids)	47	Malioxamycin	(2R)-2-[[(2S)-2-amino-3-methylbutanoyl]amino]oxybutanedioic acid	KXQRAPMNPUXYGT-VDTYLAMSSA-N	175396	NA	Peptides & Amino Acids	Amino Acid Metabolism, Non-Aromatic Amino Acid Metabolism	Amino Acid, Amine, Biogenic Amine, Carboxylic Acid	Non-proteinogenic Amino Acid, Monoamine, Dicarboxylic Acid
Platform 2 (Polyphenols and fatty acids)	53	L-Carnitine	NA	PHIQHXFUZVPYII-ZCFIWIBFSA-N	10917	C00318	Peptides & Amino Acids	Amino Acid Metabolism, Non-Aromatic Amino Acid Metabolism, Free Fatty Acid Metabolism, Beta Oxidation	Amino Acid, Amine, Biogenic Amine, Carboxylic Acid	Non-proteinogenic Amino Acid, Monoamine, Monocarboxylic Acid
Platform 3 (Primary Metabolites)	348	beta-alanine	3-Aminopropionic acid	UCMIRNVEIXFBKS-UHFFFAOYSA-N	239	C00099	Peptides & Amino Acids	Amino Acid Metabolism, Non-Aromatic Amino Acid Metabolism, Pyrimidine Metabolism, beta-Alanine metabolism, Propanoate Metabolism, Cofactor/Coenzyme Metabolism	Amino Acid, Amine, Biogenic Amine	Non-proteinogenic Amino Acid, Monoamine, Monocarboxylic Acid
Platform 3 (Primary Metabolites)	364	4-aminobutyric acid	gamma-Aminobutyric Acid (GABA)	BTCSSZJGUNDROE-UHFFFAOYSA-N	119	C00334	Peptides & Amino Acids	Amino Acid Metabolism, Non-aromatic Amino Acid Metabolism, Butanoate Metabolism, Nicotinate and Nicotinamide Metabolism, Hormone Metabolism, beta-Alanine metabolism	Amino Acid, Biogenic Amine, Carboxylic Acid, Amine	Non-proteinogenic Amino Acid, Monocarboxylic Acid, Monoamine
Platform 2 (Polyphenols and fatty acids)	221	.alpha.-Guanidinoglutaric acid	N-Amidino-L-glutamate	RHVVRMJOHATSPD-VKHMYHEASA-N	135313	NA	Peptides & Amino Acids	Amino Acid Metabolism, Non-Aromatic Amino Acid Metabolism, Nitrogen Metabolism	Amino Acid, Carboxylic Acid, Amine, Biogenic Amine	Non-proteinogenic Amino Acid, Polyamine, Guanidine-type Amine, Dicarboxylic Acid
Platform 2 (Polyphenols and fatty acids)	30	NG,NG-Dimethyl-L-arginine	ADMA	YDGMGEXADBMOMJ-LURJTMIESA-N	123831	C03626	Peptides & Amino Acids	Amino Acid Metabolism, Non-Aromatic Amino Acid Metabolism, Nitrogen Metabolism	Amino Acid, Carboxylic Acid, Amine, Biogenic Amine	Non-proteinogenic Amino Acid, Polyamine, Guanidine-type Amine, Monocarboxylic Acid
Platform 2 (Polyphenols and fatty acids)	87	Creatine	N-amidinosarcosine	CVSVTCORWBXHQV-UHFFFAOYSA-N	586	C00300	Peptides & Amino Acids	Amino Acid Metabolism, Non-Aromatic Amino Acid Metabolism, Nitrogen Metabolism	Amino Acid, Carboxylic Acid, Amine, Biogenic Amine	Non-proteinogenic Amino Acid, Polyamine, Guanidine-type Amine, Monocarboxylic Acid
Platform 2 (Polyphenols and fatty acids)	89	Citrulline	L-citrulline	RHGKLRLOHDJJDR-BYPYZUCNSA-N	9750	C00327	Peptides & Amino Acids	Amino Acid Metabolism, Non-Aromatic Amino Acid Metabolism, Nitrogen Metabolism	Amino Acid, Carboxylic Acid, Amine, Amide, Biogenic Amine	Non-proteinogenic Amino Acid, Polyamine, Monoamide, Monocarboxylic Acid
Platform 3 (Primary Metabolites)	223	xylose	D-xylose	SRBFZHDQGSBBOR-IOVATXLUSA-N	135191	C00181	Carbohydrates	Sugar Metabolism, Sugar (Mono- and di-saccharide) Metabolism	Monosaccharide	Pentose, Aldopentose, Aldose
Platform 3 (Primary Metabolites)	256	ribose	NA	HMFHBZSHGGEWLO-SOOFDHNKSA-N	5779	C00121	Carbohydrates	Sugar Metabolism, Sugar (Mono- and di-saccharide) Metabolism, Pentose Phosphate Pathway, Amino and Nucleotide Sugar Metabolism	Monosaccharide	Pentose, Aldopentose, Aldose
Platform 3 (Primary Metabolites)	288	lyxose	Lyxopyranose	SRBFZHDQGSBBOR-AGQMPKSLSA-N	439240	C00476	Carbohydrates	Sugar Metabolism, Sugar (Mono- and di-saccharide) Metabolism	Monosaccharide	Pentose, Aldopentose, Aldose
Platform 2 (Polyphenols and fatty acids)	86	D-(+)-Ribonic acid .gamma.-lactone	D-Ribonolactone	CUOKHACJLGPRHD-BXXZVTAOSA-N	111064	NA	Carbohydrates	Sugar Metabolism, Sugar (Mono- and di-saccharide) Metabolism, Lactone Metabolism	Monosaccharide, Lactone	Pentose, Gamma-lactone
Platform 3 (Primary Metabolites)	269	pentono-gamma-lactone	D-Ribonic acid gamma lactone	CUOKHACJLGPRHD-UHFFFAOYSA-N	219575	NA	Carbohydrates	Sugar Metabolism, Sugar (Mono- and di-saccharide) Metabolism, Lactone Metabolism	Monosaccharide, Lactone	Pentose, Gamma-lactone
Platform 3 (Primary Metabolites)	222	xylulose	D-xylulose	LQXVFWRQNMEDEE-PYHARJCCSA-N	439205	C00312	Carbohydrates	Sugar Metabolism, Sugar (Mono- and di-saccharide) Metabolism, Pentose Phosphate Pathway	Monosaccharide	Pentose, Ketopentose, Ketose
Platform 3 (Primary Metabolites)	255	ribulose	Arabinulose	ZAQJHHRNXZUBTE-NQXXGFSBSA-N	151261	C00309	Carbohydrates	Sugar Metabolism, Sugar (Mono- and di-saccharide) Metabolism, Pentose Phosphate Pathway	Monosaccharide	Pentose, Ketopentose, Ketose
Platform 2 (Polyphenols and fatty acids)	64	Gallic acid	NA	LNTHITQWFMADLM-UHFFFAOYSA-N	370	C01424	Phenolics	Aminobenzoate Metabolism, Gallic Acid Metabolism, Tannin Metabolism, Hydrolyzable Tannin Metabolism	Simple Phenol, Organic Acid, Carboxylic Acid	Phenolic Acid, Monocarboxylic Acid
Platform 2 (Polyphenols and fatty acids)	216	(-)-Catechin gallate	(-)-CG	LSHVYAFMTMFKBA-CTNGQTDRSA-N	6419835	C22594	Phenolics	Flavonoid Metabolism	Flavanol, Polyphenol, Ester	Phenolic Ester, Flavan-3-ol Ester, Gallated Catechin
Platform 2 (Polyphenols and fatty acids)	156	2-(4-t-butylphenoxy)cyclohexanol	tBPC	FTIXUILRMBSXNS-UHFFFAOYSA-N	16033	NA	Phenolics	Phenol Metabolism,	Simple Phenol	Phenolic Ester, Phenylpropane
Platform 2 (Polyphenols and fatty acids)	18	Salidroside	Tyrosol glucoside	ILRCGYURZSFMEG-RKQHYHRCSA-N	159278	C06046	Phenolics	Tyrosine Metabolism, Sugar Metabolism, Sugar (Mono- and Di-saccharide Metabolism)	Simple Phenol, O-Glycoside	Phenolic Glycoside
Platform 2 (Polyphenols and fatty acids)	23	Picraquassioside D	NA	SJBWDSQCMPAGHA-UHFFFAOYSA-N	56776291	NA	Phenolics	Aminobenzoate Metabolism, Sugar Metabolism, Sugar (Mono- and Di-saccharide Metabolism)	Simple Phenol, O-Glycoside	Phenolic Glycoside
Platform 2 (Polyphenols and fatty acids)	95	Arbutin	Hydroquinone-O-beta-D-glucopyranoside	BJRNKVDFDLYUGJ-RMPHRYRLSA-N	440936	C06186	Phenolics	Tyrosine Metabolism, Benzoate Metabolism, Aminobenzoate Metabolism	Simple Phenol, O-Glycoside	Phenolic Glycoside
Platform 2 (Polyphenols and fatty acids)	115	4,8-Dihydroxynaphthalen-1-yl .beta.-D-glucopyranoside	alpha-Hydrojuglone 4-glucoside	LASMTIIWUCJLEH-YMILTQATSA-N	477404	NA	Phenolics	Napthoquinone Metabolism, Allelopathy, Sugar Metabolism, Sugar (Mono- and Di-saccharide Metabolism)	Simple Phenol, O-Glycoside	Phenolic Glycoside
Platform 2 (Polyphenols and fatty acids)	119	4-Hydroxy-3-methoxyphenyl .beta.-D-glucopyranoside	Tachioside	KWVHACHAQJFTLZ-UJPOAAIJSA-N	11962143	NA	Phenolics	Tyrosine Metabolism, Aminobenzoate Metabolism, Benzoate Metabolism, Cyclohexane Metabolism	Simple Phenol, O-Glycoside	Phenolic Glycoside
Platform 2 (Polyphenols and fatty acids)	141	3-(3-(.beta.-D-Glucopyranosyloxy)-2-methoxyphenyl)propanoic acid	NA	XZQAWTALZWSELU-YMILTQATSA-N	102394750	NA	Phenolics	Phenylpropanoid Metabolism, Sugar Metabolism, Sugar (Mono- and Di-saccharide Metabolism)	Simple Phenol, O-Glycoside, Carboxylic Acid	Phenolic Glycoside, Cinnamate Glycoside
Platform 2 (Polyphenols and fatty acids)	142	3-(2-(.beta.-D-Glucopyranosyloxy)-4-methoxyphenyl)propanoic acid	NA	LIVNOUBJFOXZOR-YMILTQATSA-N	11100427	NA	Phenolics	Phenylpropanoid Metabolism, Sugar Metabolism, Sugar (Mono- and Di-saccharide Metabolism)	Simple Phenol, O-Glycoside, Carboxylic Acid	Phenolic Glycoside, Cinnamate Glycoside
Platform 2 (Polyphenols and fatty acids)	143	3-(2-(.beta.-D-Glucopyranosyloxy)-3-hydroxyphenyl)propanoic acid	NA	APQFDHZCDLNMLA-APACUCGBSA-N	100640816	NA	Phenolics	Phenylpropanoid Metabolism, Sugar Metabolism, Sugar (Mono- and Di-saccharide Metabolism)	Simple Phenol, O-Glycoside, Carboxylic Acid	Phenolic Glycoside, Cinnamate Glycoside
Platform 3 (Primary Metabolites)	263	prunin	Naringenin 7-O-beta-D-glucoside	DLIKSSGEMUFQOK-SFTVRKLSSA-N	92794	C09099	Phenolics	Flavonoid Metabolism, Sugar Metabolism, Sugar (Mono- and Di-saccharide) Metabolism, O-Glycoside Metabolism	Flavanone, Polyphenol, O-Glycoside	Phenolic Glycoside, Flavanone Glycoside
Platform 2 (Polyphenols and fatty acids)	16	Sayaendoside	(2R,3S,4S,5R,6R)-5-[(2S,3R,4R)-3,4-dihydroxy-4-(hydroxymethyl)oxolan-2-yl]oxy-2-(hydroxymethyl)-6-(2-phenylethoxy)oxane-3,4-diol	UWKRNCNWJVCHGZ-DERWZFJFSA-N	10993414	NA	Phenolics	Tyrosine Metabolism, Amino Acid Metabolism, Aromatic Amino Acid Metabolism, Sugar Metabolism, Sugar (Mono- and Di-saccharide Metabolism)	Simple Phenol, Phenethyl Alcohol, O-Glycoside	Phenolic Glycoside, Phenylethanoid
Platform 2 (Polyphenols and fatty acids)	145	2-Phenylethyl 6-O-pentopyranosylhexopyranoside	Phenylethyl primeveroside	ZRGXCWYRIBRSQA-UHFFFAOYSA-N	14704521	NA	Phenolics	Tyrosine Metabolism, Amino Acid Metabolism, Aromatic Amino Acid Metabolism, Sugar Metabolism, Sugar (Mono- and Di-saccharide Metabolism)	Simple Phenol, Phenethyl Alcohol, O-Glycoside	Phenolic Glycoside, Phenylethanoid
Platform 2 (Polyphenols and fatty acids)	146	2-Phenylethyl 6-O-((2S,3R,4R)-3,4-dihydroxy-4-(hydroxymethyl)tetrahydrofuran-2-yl)-.beta.-D-glucopyranoside	NA	GZSQKOFXMZDKPV-DERWZFJFSA-N	56776299	NA	Phenolics	Tyrosine Metabolism, Amino Acid Metabolism, Aromatic Amino Acid Metabolism, Sugar Metabolism, Sugar (Mono- and Di-saccharide Metabolism)	Simple Phenol, Phenethyl Alcohol, O-Glycoside	Phenolic Glycoside, Phenylethanoid
Platform 2 (Polyphenols and fatty acids)	147	2-Phenylethyl 2-O-.beta.-D-xylopyranosyl-.beta.-D-glucopyranoside	NA	CGZNTHDUAFIKOH-BMVMOQKNSA-N	24121293	NA	Phenolics	Tyrosine Metabolism, Amino Acid Metabolism, Aromatic Amino Acid Metabolism, Sugar Metabolism, Sugar (Mono- and Di-saccharide Metabolism)	Simple Phenol, Phenethyl Alcohol, O-Glycoside	Phenolic Glycoside, Phenylethanoid
Platform 2 (Polyphenols and fatty acids)	158	2-(4-Hydroxyphenyl)ethyl 6-O-((2-oxo-2,3-dihydro-1H-indol-3-yl)acetyl)-.beta.-D-glucopyranoside	NA	YOTVUKXKJYRTAR-NAJYVHOLSA-N	57509467	NA	Phenolics	Tyrosine Metabolism, Amino Acid Metabolism, Aromatic Amino Acid Metabolism, Sugar Metabolism, Sugar (Mono- and Di-saccharide Metabolism), Alkaloid Metabolism	Polyphenol, Phenylethanoid, O-Glycoside, Amine, Biogenic Amine, Alkaloid, True Alkaloid (Amino Acid Derived w/ Nitrogen Heterocycle)	Phenolic Glycoside, Phenylethanoid, Monoamine, Indole Alkaloid
Platform 2 (Polyphenols and fatty acids)	202	(4-(.beta.-D-Glucopyranosyloxy)phenyl)acetic acid	NA	YHJWCNZGHBFVTB-RGCYKPLRSA-N	14352568	NA	Phenolics	Phenylalanine Metabolism, Amino Acid Metabolism, Aromatic Amino Acid Metabolism, Sugar Metabolism, Sugar (Mono- and Di-saccharide) Metabolism	Simple Phenol, O-Glycoside, Carboxylic Acid	Phenylacetate, Monocarboxylic Acid
Platform 3 (Primary Metabolites)	232	tyrosol	NA	YCCILVSKPBXVIP-UHFFFAOYSA-N	10393	C06044	Phenolics	Tyrosine Metabolism, Amino Acid Metabolism, Aromatic Amino Acid Metabolism	Simple Phenol, Phenethyl Alcohol	Phenylethanoid
Platform 2 (Polyphenols and fatty acids)	3	Tyramine	L-Tyramine	DZGWFCGJZKJUFP-UHFFFAOYSA-N	5610	C00483	Phenolics	Tyrosine Metabolism, Alkaloid Metabolism, Cofactor Metabolism	Amine, Biogenic Amine, Alkaloid, Simple Phenol, Protoalkaloid (Amino Acid Derived w/ Side-chain Amine)	Phenylethylamine Alkaloid, Phenolic Amine, Monoamine
Platform 1 (Lipids)	444	PA 34:2|PA 16:0_18:2	(1-Hexadecanoyloxy-3-phosphonooxypropan-2-yl) octadeca-9,12-dienoate	YQMUIZXKIKXZHD-UHFFFAOYSA-N	74413553	NA	Lipids	Phospholipid Metabolism, Phospholipase (PLA2 & PLD) Metabolism, Glyceride Metabolism	Phospholipid	Phosphatidic Acid (PA) (L1)	Phospholipids
Platform 1 (Lipids)	445	PA 35:2|PA 17:0_18:2	NA	FAKFGVATVCJIPF-UHFFFAOYSA-N	NA	NA	Lipids	Phospholipid Metabolism, Phospholipase (PLA2 & PLD) Metabolism, Glyceride Metabolism	Phospholipid	Phosphatidic Acid (PA) (L1)	Phospholipids
Platform 1 (Lipids)	446	PA 36:3|PA 18:1_18:2	NA	MVSJLGUSXDKOAR-UHFFFAOYSA-N	NA	NA	Lipids	Phospholipid Metabolism, Phospholipase (PLA2 & PLD) Metabolism, Glyceride Metabolism	Phospholipid	Phosphatidic Acid (PA) (L1)	Phospholipids
Platform 1 (Lipids)	447	PA 36:4|PA 18:2_18:2	(2-Octadeca-9,12-dienoyloxy-3-phosphonooxypropyl) octadeca-9,12-dienoate	OBXRDFNCKFWKNY-UHFFFAOYSA-N	114510	NA	Lipids	Phospholipid Metabolism, Phospholipase (PLA2 & PLD) Metabolism, Glyceride Metabolism	Phospholipid	Phosphatidic Acid (PA) (L1)	Phospholipids
Platform 1 (Lipids)	448	PC 31:0	1-palmitoyl-2-pentadecanoyl-sn-glycero-3-phosphocholine	NPGWXTIWUUFYAB-DIPNUNPCSA-N	24778680	NA	Lipids	Phospholipid Metabolism, Cell Membrane Metabolism	Phospholipid	Phosphatidylcholine (PC) (L1)	Phospholipids
Platform 1 (Lipids)	449	PC 32:0	1,2-Dipalmitoyl-sn-glycero-3-phosphocholine	KILNVBDSWZSGLL-KXQOOQHDSA-N	452110	NA	Lipids	Phospholipid Metabolism, Cell Membrane Metabolism	Phospholipid	Phosphatidylcholine (PC) (L1)	Phospholipids
Platform 1 (Lipids)	450	PC 33:1	1-(9Z-hexadecenoyl)-2-heptadecanoyl-glycero-3-phosphocholine	OFRWLQSOUIZELQ-VEAYGOGPSA-N	52922442	NA	Lipids	Phospholipid Metabolism, Cell Membrane Metabolism	Phospholipid	Phosphatidylcholine (PC) (L1)	Phospholipids
Platform 1 (Lipids)	451	PC 33:2	1-(9Z,12Z-octadecadienoyl)-2-pentadecanoyl-glycero-3-phosphocholine	SBNDHGBVMZMSNL-UESLNCBNSA-N	52922715	NA	Lipids	Phospholipid Metabolism, Cell Membrane Metabolism	Phospholipid	Phosphatidylcholine (PC) (L1)	Phospholipids
Platform 1 (Lipids)	452	PC 34:0	1-PALMITOYL-2-STEAROYL-SN-GLYCERO-3-PHOSPHOCHOLINE	PZNPLUBHRSSFHT-RRHRGVEJSA-N	24778686	NA	Lipids	Phospholipid Metabolism, Cell Membrane Metabolism	Phospholipid	Phosphatidylcholine (PC) (L1)	Phospholipids
Platform 1 (Lipids)	453	PC 34:1	1-Palmitoyl-2-oleoyl-sn-glycero-3-phosphocholine	WTJKGGKOPKCXLL-VYOBOKEXSA-N	5497103	NA	Lipids	Phospholipid Metabolism, Cell Membrane Metabolism	Phospholipid	Phosphatidylcholine (PC) (L1)	Phospholipids
Platform 1 (Lipids)	454	PC 34:2	1-Palmitoyl-2-linoleoyl-sn-glycero-3-phosphocholine	JLPULHDHAOZNQI-ZTIMHPMXSA-N	5287971	NA	Lipids	Phospholipid Metabolism, Cell Membrane Metabolism	Phospholipid	Phosphatidylcholine (PC) (L1)	Phospholipids
Platform 1 (Lipids)	455	PC 34:3	1-palmitoyl-2-[(6Z,9Z,12Z)-octadecatrienoyl]-sn-glycero-3-phosphocholine	CNNSEHUKQJCGTE-UPPWDXJYSA-N	24778699	NA	Lipids	Phospholipid Metabolism, Cell Membrane Metabolism	Phospholipid	Phosphatidylcholine (PC) (L1)	Phospholipids
Platform 1 (Lipids)	456	PC 34:3 Isomer B	1-(8Z,11Z,14Z-eicosatrienoyl)-2-tetradecanoyl-glycero-3-phosphocholine	VKVSSDKCKXJFIM-AFYHZPHLSA-N	52923213	NA	Lipids	Phospholipid Metabolism, Cell Membrane Metabolism	Phospholipid	Phosphatidylcholine (PC) (L1)	Phospholipids
Platform 1 (Lipids)	457	PC 35:1	1-(9Z-octadecenoyl)-2-heptadecanoyl-glycero-3-phosphocholine	MFHIZGSSDZJFKD-IYEJTHTFSA-N	52922679	NA	Lipids	Phospholipid Metabolism, Cell Membrane Metabolism	Phospholipid	Phosphatidylcholine (PC) (L1)	Phospholipids
Platform 1 (Lipids)	458	PC 35:2 Isomer B	1-(9Z,12Z-octadecadienoyl)-2-heptadecanoyl-glycero-3-phosphocholine	MJWAVUYQCBFFHQ-WESJWMGVSA-N	52922721	NA	Lipids	Phospholipid Metabolism, Cell Membrane Metabolism	Phospholipid	Phosphatidylcholine (PC) (L1)	Phospholipids
Platform 1 (Lipids)	459	PC 36:2	1,2-Dioleoyl-sn-Glycero-3-Phosphocholine	SNKAWJBJQDLSFF-NVKMUCNASA-N	10350317	NA	Lipids	Phospholipid Metabolism, Cell Membrane Metabolism	Phospholipid	Phosphatidylcholine (PC) (L1)	Phospholipids
Platform 1 (Lipids)	460	PC 36:3 Isomer A	1-(9Z-octadecenoyl)-2-(6Z,9Z-octadecadienoyl)-sn-glycero-3-phosphocholine	BXRLDROZWDUSGM-ZRYFCQOPSA-N	24778937	NA	Lipids	Phospholipid Metabolism, Cell Membrane Metabolism	Phospholipid	Phosphatidylcholine (PC) (L1)	Phospholipids
Platform 1 (Lipids)	461	PC 36:4 Isomer A	1-g-linolenoyl-2-oleoyl-sn-glycero-3-phosphocholine	NKQPOVROGSWLTO-NVPMBMBWSA-N	52922783	NA	Lipids	Phospholipid Metabolism, Cell Membrane Metabolism	Phospholipid	Phosphatidylcholine (PC) (L1)	Phospholipids
Platform 1 (Lipids)	462	PC 36:5 Isomer A	1-palmitoleoyl-2-arachidonoyl-sn-glycero-3-phosphocholine	DYDDZDMJSQYFGN-OIVUZXIWSA-N	24778771	NA	Lipids	Phospholipid Metabolism, Cell Membrane Metabolism	Phospholipid	Phosphatidylcholine (PC) (L1)	Phospholipids
Platform 1 (Lipids)	463	PC 36:5 Isomer A	1-eicosapentaenoyl-2-palmitoyl-sn-glycero-3-phosphocholine	SUZYROYNFNQALJ-MHEIZRSESA-N	52923341	NA	Lipids	Phospholipid Metabolism, Cell Membrane Metabolism	Phospholipid	Phosphatidylcholine (PC) (L1)	Phospholipids
Platform 1 (Lipids)	464	PC 38:2	1-eicosanoyl-2-(9Z,12Z-octadecadienoyl)-sn-glycero-3-phosphocholine	KXXLFCAPKGRXBT-FMJYHZMHSA-N	24779263	NA	Lipids	Phospholipid Metabolism, Cell Membrane Metabolism	Phospholipid	Phosphatidylcholine (PC) (L1)	Phospholipids
Platform 1 (Lipids)	465	PC 38:3	1-eicosadienoyl-2-vaccenoyl-sn-glycero-3-phosphocholine	KNNHXKQRTYEWCA-HYYWERRFSA-N	53478919	NA	Lipids	Phospholipid Metabolism, Cell Membrane Metabolism	Phospholipid	Phosphatidylcholine (PC) (L1)	Phospholipids
Platform 1 (Lipids)	466	PC 38:5 Isomer B	1-arachidonoyl-2-vaccenoyl-sn-glycero-3-phosphocholine	YLWBKBDNHWQEFU-YJXJLLHLSA-N	53479033	NA	Lipids	Phospholipid Metabolism, Cell Membrane Metabolism	Phospholipid	Phosphatidylcholine (PC) (L1)	Phospholipids
Platform 1 (Lipids)	467	PC 38:6 Isomer C	1-arachidonoyl-2-linoleoyl-sn-glycero-3-phosphocholine	PLZBTDKJYHXIEW-DZUXOTHRSA-N	52923295	NA	Lipids	Phospholipid Metabolism, Cell Membrane Metabolism	Phospholipid	Phosphatidylcholine (PC) (L1)	Phospholipids
Platform 1 (Lipids)	468	PC P-40:3 or PC O-40:4	1-Arachidyl-2-eicsoic acid	RDNHPNJCALITSY-MBZSPAKGSA-N	52923852	NA	Lipids	Phospholipid Metabolism, Cell Membrane Metabolism	Phospholipid	Phosphatidylcholine (PC) (L1)	Phospholipids
Platform 2 (Polyphenols and fatty acids)	136	3-Hydroxy-2-((9Z,12Z)-octadeca-9,12-dienoyloxy)propyl 2-(trimethylazaniumyl)ethyl phosphate	NA	LSUXCWJOIAWGOU-UTJQPWESSA-N	24871190	NA	Lipids	Phospholipid Metabolism, Cell Membrane Metabolism	Phospholipid	Phosphatidylcholine (PC) (L1)	Phospholipids
Platform 1 (Lipids)	437	LPC 18:0	1-Stearoyl-sn-glycero-3-phosphocholine, 1-Stearoyl-2-hydroxy-sn-glycero-3-phosphocholine, LPC(18:0/0:0)	IHNKQIMGVNPMTC-RUZDIDTESA-N	497299	NA	Lipids	Phospholipid Metabolism, Phospholipase (PLA2 & PLD) Metabolism	Phospholipid	Phosphatidylcholine (PC) (L1), Lysophosphatidylcholine (LPC) (L2)	Phospholipids
Platform 1 (Lipids)	438	LPC 18:1	1-Oleoyl-sn-glycero-3-phosphocholine	YAMUFBLWGFFICM-PTGWMXDISA-N	16081932	NA	Lipids	Phospholipid Metabolism, Phospholipase (PLA2 & PLD) Metabolism	Phospholipid	Phosphatidylcholine (PC) (L1), Lysophosphatidylcholine (LPC) (L2)	Phospholipids
Platform 1 (Lipids)	439	LPC 18:2	1-Linoleoyl-sn-glycero-3-phosphorylcholine	SPJFYYJXNPEZDW-FTJOPAKQSA-N	11005824	NA	Lipids	Phospholipid Metabolism, Phospholipase (PLA2 & PLD) Metabolism	Phospholipid	Phosphatidylcholine (PC) (L1), Lysophosphatidylcholine (LPC) (L2)	Phospholipids
Platform 1 (Lipids)	440	LPC 18:3	1-linolenoyl-sn-glycero-3-phosphocholine	WKQNRCYKYCKESD-YVHLTTHBSA-N	24779469	NA	Lipids	Phospholipid Metabolism, Phospholipase (PLA2 & PLD) Metabolism	Phospholipid	Phosphatidylcholine (PC) (L1), Lysophosphatidylcholine (LPC) (L2)	Phospholipids
Platform 1 (Lipids)	441	LPC 20:0	1-arachidoyl-sn-glycero-3-phosphocholine	UATOAILWGVYRQS-HHHXNRCGSA-N	24779473	NA	Lipids	Phospholipid Metabolism, Phospholipase (PLA2 & PLD) Metabolism	Phospholipid	Phosphatidylcholine (PC) (L1), Lysophosphatidylcholine (LPC) (L2)	Phospholipids
Platform 2 (Polyphenols and fatty acids)	182	1-Palmitoyl-sn-glycero-3-phosphocholine	LPC(16:0/0:0), LPC 16:0, 1-Palmitoyl-sn-glycero-3-phosphocholine	ASWBNKHCZGQVJV-HSZRJFAPSA-N	460602	NA	Lipids	Phospholipid Metabolism, Phospholipase (PLA2 & PLD) Metabolism	Phospholipid	Phosphatidylcholine (PC) (L1), Lysophosphatidylcholine (LPC) (L2)	Phospholipids
Platform 2 (Polyphenols and fatty acids)	188	1-Linoleoyl-sn-glycero-3-phosphorylcholine	LPC 18:2	SPJFYYJXNPEZDW-UTJQPWESSA-N	5280646	NA	Lipids	Phospholipid Metabolism, Phospholipase (PLA2 & PLD) Metabolism	Phospholipid	Phosphatidylcholine (PC) (L1), Lysophosphatidylcholine (LPC) (L2)	Phospholipids
Platform 2 (Polyphenols and fatty acids)	189	1-Heptadecanoyl-sn-glycero-3-phosphocholine	LPC 17:0	SRRQPVVYXBTRQK-XMMPIXPASA-N	24779463	NA	Lipids	Phospholipid Metabolism, Phospholipase (PLA2 & PLD) Metabolism	Phospholipid	Phosphatidylcholine (PC) (L1), Lysophosphatidylcholine (LPC) (L2)	Phospholipids
Platform 1 (Lipids)	473	PEtOH 36:4|PEtOH 18:2_18:2	NA	XYSXTPSWFGGRMW-UHFFFAOYSA-N	NA	NA	Lipids	Phospholipid Metabolism, Cell Membrane Metabolism, Phospholipase (PLA2 & PLD) Metabolism	Phospholipid	Phosphatidylethanol (PEth) (L1)	Phospholipids
Platform 1 (Lipids)	469	PE 34:1	1-palmitoyl-2-oleoyl-GPE	FHQVHHIBKUMWTI-OTMQOFQLSA-N	59834030	NA	Lipids	Phospholipid Metabolism, Cell Membrane Metabolism, Bioactive Lipid (NAE & NAPE ) Metabolism	Phospholipid	Phosphatidylethanolamine (PE) (L1)	Phospholipids
Platform 1 (Lipids)	470	PE 34:2	1-palmitoyl-2-linoleoyl-GPE	HBZNVZIRJWODIB-NHCUFCNUSA-N	46891780	NA	Lipids	Phospholipid Metabolism, Cell Membrane Metabolism, Bioactive Lipid (NAE & NAPE ) Metabolism	Phospholipid	Phosphatidylethanolamine (PE) (L1)	Phospholipids
Platform 1 (Lipids)	471	PE 36:2	2-azaniumylethyl 2,3-bis[[(Z)-octadec-9-enoyl]oxy]propyl phosphate	MWRBNPKJOOWZPW-CLFAGFIQSA-N	9831899	NA	Lipids	Phospholipid Metabolism, Cell Membrane Metabolism, Bioactive Lipid (NAE & NAPE ) Metabolism	Phospholipid	Phosphatidylethanolamine (PE) (L1)	Phospholipids
Platform 1 (Lipids)	472	PE 36:3	1-linoleoyl-2-oleoyl-GPE	DOILLFCKSSPXMF-ZKZIFNJMSA-N	52924364	NA	Lipids	Phospholipid Metabolism, Cell Membrane Metabolism, Bioactive Lipid (NAE & NAPE ) Metabolism	Phospholipid	Phosphatidylethanolamine (PE) (L1)	Phospholipids
Platform 1 (Lipids)	442	LPE 18:2	2-(9Z,12Z)-octadecadienoyl-sn-glycero-3-phosphoethanolamine	SVRBKLJIDJHADS-USWSLJGRSA-N	71768149	NA	Lipids	Phospholipid Metabolism, Phospholipase (PLA2 & PLD) Metabolism	Phospholipid	Phosphatidylethanolamine (PE) (L1), Lysophosphatidylethanolamines (LPE) (L2)	Phospholipids
Platform 1 (Lipids)	443	LPE-N (FA)36:4|LPE-N (FA 20:3)16:1	NA	QQVWCALZWGRUSM-UHFFFAOYSA-N	NA	NA	Lipids	Phospholipid Metabolism, Phospholipase (PLA2 & PLD) Metabolism	Phospholipid	Phosphatidylethanolamine (PE) (L1), Lysophosphatidylethanolamines (LPE) (L2)	Phospholipids
Platform 2 (Polyphenols and fatty acids)	180	1-Stearoyl-2-hydroxy-sn-glycero-3-phosphoethanolamine	LPE(18:0/0:0)	BBYWOYAFBUOUFP-JOCHJYFZSA-N	9547068	NA	Lipids	Phospholipid Metabolism, Phospholipase (PLA2 & PLD) Metabolism	Phospholipid	Phosphatidylethanolamine (PE) (L1), Lysophosphatidylethanolamines (LPE) (L2)	Phospholipids
Platform 2 (Polyphenols and fatty acids)	183	1-Palmitoyl-2-hydroxy-sn-glycero-3-phosphoethanolamine	LPE(16:0/0:0)	YVYMBNSKXOXSKW-HXUWFJFHSA-N	9547069	NA	Lipids	Phospholipid Metabolism, Phospholipase (PLA2 & PLD) Metabolism	Phospholipid	Phosphatidylethanolamine (PE) (L1), Lysophosphatidylethanolamines (LPE) (L2)	Phospholipids
Platform 1 (Lipids)	474	PI 34:1	1-palmitoyl-2-oleoyl-sn-glycero-3-phosphoinositol	PDLAMJKMOKWLAJ-AGORXRROSA-N	5771758	NA	Lipids	Phospholipid Metabolism, Cell Membrane Metabolism	Phospholipid	Phosphatidylinositol (PI) (L1)	Phospholipids
Platform 1 (Lipids)	475	PI 34:2	NA	YHPPEKFMAUATQU-UHFFFAOYSA-N	NA	NA	Lipids	Phospholipid Metabolism, Cell Membrane Metabolism	Phospholipid	Phosphatidylinositol (PI) (L1)	Phospholipids
Platform 1 (Lipids)	476	PI 34:2	1-(9Z,12Z-octadecadienoyl)-2-hexadecanoyl-glycero-3-phospho-(1'-myo-inositol)	ZPUUVEHXYAPJAQ-KOHXHNRGSA-N	NA	NA	Lipids	Phospholipid Metabolism, Cell Membrane Metabolism	Phospholipid	Phosphatidylinositol (PI) (L1)	Phospholipids
Platform 1 (Lipids)	477	PI 34:3|PI 16:0_18:3	1-hexadecanoyl-2-(9Z,12Z,15Z-octadecatrienoyl)-glycero-3-phospho-(1'-myo-inositol)	UHAJRYVOXHROHT-UHFFFAOYSA-N	NA	NA	Lipids	Phospholipid Metabolism, Cell Membrane Metabolism	Phospholipid	Phosphatidylinositol (PI) (L1)	Phospholipids
Platform 1 (Lipids)	478	PI 36:1	1-stearoyl-2-oleoyl-sn-glycero-3-phospho-1D-myo-inositol	YOBFISPJJWPPTK-JUCSSFOXSA-N	NA	NA	Lipids	Phospholipid Metabolism, Cell Membrane Metabolism	Phospholipid	Phosphatidylinositol (PI) (L1)	Phospholipids
Platform 1 (Lipids)	479	PI 36:2	1-Stearoyl-2-linoleoyl-sn-glycero-3-phosphoinositol	KZVRAFHIKMDULK-PDPKURFXSA-N	NA	NA	Lipids	Phospholipid Metabolism, Cell Membrane Metabolism	Phospholipid	Phosphatidylinositol (PI) (L1)	Phospholipids
Platform 1 (Lipids)	480	PI 36:3	1-(8Z,11Z,14Z-eicosatrienoyl)-2-hexadecanoyl-glycero-3-phospho-(1'-myo-inositol)	UPMVFTFJRCVMKL-PVJQQWEWSA-N	NA	NA	Lipids	Phospholipid Metabolism, Cell Membrane Metabolism	Phospholipid	Phosphatidylinositol (PI) (L1)	Phospholipids
Platform 1 (Lipids)	481	PI 36:4	1-(5Z,8Z,11Z,14Z-eicosatetraenoyl)-2-hexadecanoyl-glycero-3-phospho-(1'-myo-inositol)	WPXXYOUAQYYXER-BFRKKRKTSA-N	NA	NA	Lipids	Phospholipid Metabolism, Cell Membrane Metabolism	Phospholipid	Phosphatidylinositol (PI) (L1)	Phospholipids
Platform 2 (Polyphenols and fatty acids)	82	D-myo-Inositol, 1-[2-hydroxy-3-[(1-oxo-9,12-octadecadienyl)oxy]propyl hydrogen phosphate], [S-(Z,Z)]-	NA	SAHCQBPGXQFTRA-MTWZWZNHSA-N	NA	NA	Lipids	Phospholipid Metabolism, Cell Membrane Metabolism	Phospholipid	Phosphatidylinositol (PI) (L1)	Phospholipids
Platform 2 (Polyphenols and fatty acids)	193	(S)-2-Ureidopentanedioic acid	N-Carbamyl-L-glutamic acid	LCQLHJZYVOQKHU-VKHMYHEASA-N	121396	C05829	Peptides & Amino Acids	Amino Acid Metabolism, Non-Aromatic Amino Acid Metabolism	Carboxylic Acid, Amide	Polyamide, Dicarboxylic Acid
Platform 3 (Primary Metabolites)	262	putrescine	1,4-Butanediamine	KIDHWZJUCRJVML-UHFFFAOYSA-N	1045	C00134	Alkaloids	Nitrogen Metabolism, Amino Acid Metabolism, Non-Aromatic Amino Acid Metabolism, Glutathione Metabolism, Alkaloid Metabolism	Biogenic Amine, Amine, Alkaloid	Polyamine Alkaloid, Diamine, Alkanamine
Platform 3 (Primary Metabolites)	264	propyleneglycol	Propane-1,2-diol	DNIAPMSPPWPWGF-GSVOUGTGSA-N	259994	C00583	Carbohydrates	Sugar Metabolism, Propanoate Metabolism	Alcohol	Polyhydric Alcohol
Platform 3 (Primary Metabolites)	290	lysine	NA	KDXKERNSBIXSRK-YFKPBYRVSA-N	5962	C00047	Peptides & Amino Acids	Amino Acid Metabolism, Non-Aromatic Amino Acid Metabolism, Alkaloid Metabolism	Amino Acid, Carboxylic Acid, Amine	Proteinogenic Amino Acid, Diamine, Monocarboxylic Acid
Platform 3 (Primary Metabolites)	316	glutamic acid	Glutamate	WHUUTDBJXJRKMK-VKHMYHEASA-N	33032	C00025	Peptides & Amino Acids	Nitrogen Metabolism, Amino Acid Metabolism, Non-Aromatic Amino Acid Metabolism, Glutathione Metabolism, Glyoxylate Metabolism, Alkaloid Metabolism, Butanoate Metabolism, Cofactor/Coenzyme Metabolism	Amino Acid, Carboxylic Acid, Amine	Proteinogenic Amino Acid, Monoamine, Dicarboxylic Acid
Platform 2 (Polyphenols and fatty acids)	51	L-Glutamine	NA	ZDXPYRJPNDTMRX-VKHMYHEASA-N	5961	C00064	Peptides & Amino Acids	Amino Acid Metabolism, Non-Aromatic Amino Acid Metabolism, Nitrogen Metabolism, Purine Metabolism, Pyrimidine Metabolism, Glyoxylate Metabolism, Vitamin Metabolism, Vitamin B6 Metabolism, Cofactor Metabolism, Nucleotide Metabolism	Amino Acid, Carboxylic Acid, Amine, Biogenic Amine, Amide	Proteinogenic Amino Acid, Monoamine, Monoamide, Monocarboxylic Acid
Platform 3 (Primary Metabolites)	310	glycine	Aminoacetic acid	DHMQDGOQFOQNFH-UHFFFAOYSA-N	750	C00037	Peptides & Amino Acids	Amino Acid Metabolism, Non-Aromatic Amino Acid Metabolism, Glutathione Metabolism, Glyoxylate Metabolism	Amino Acid, Amine, Biogenic Amine, Carboxylic Acid	Proteinogenic Amino Acid, Monoamine, Monoarboxylic Acid
Platform 3 (Primary Metabolites)	227	valine	L-valine	KZSNJWFQEVHDMF-BYPYZUCNSA-N	6287	C00183	Peptides & Amino Acids	Amino Acid Metabolism, Non-aromatic Amino Acid Metabolism	Amino Acid, Carboxylic Acid, Amine	Proteinogenic Amino Acid, Monoamine, Monocarboxylic Acid
Platform 3 (Primary Metabolites)	296	leucine	NA	ROHFNLRQFUQHCH-YFKPBYRVSA-N	7045798	C00123	Peptides & Amino Acids	Amino Acid Metabolism, Non-aromatic Amino Acid Metabolism, Glucosinalate Metabolism, Alkaloid Metabolism	Amino Acid, Carboxylic Acid, Amine	Proteinogenic Amino Acid, Monoamine, Monocarboxylic Acid
Platform 3 (Primary Metabolites)	302	isoleucine	NA	AGPKZVBTJJNPAG-WHFBIAKZSA-N	6306	C00407	Peptides & Amino Acids	Amino Acid Metabolism, Non-aromatic Amino Acid Metabolism, Glucosinalate Metabolism, Alkaloid Metabolism	Amino Acid, Carboxylic Acid, Amine	Proteinogenic Amino Acid, Monoamine, Monocarboxylic Acid
Platform 3 (Primary Metabolites)	355	alanine	L-alanine	QNAYBMKLOCPYGJ-REOHCLBHSA-N	5950	C00041	Peptides & Amino Acids	Amino Acid Metabolism, Non-Aromatic Amino Acid Metabolism, Carbon Fixation	Amino Acid, Amine, Biogenic Amine	Proteinogenic Amino Acid, Monoamine, Monocarboxylic Acid
Platform 2 (Polyphenols and fatty acids)	74	DL-Arginine	(+-)-Arginine	ODKSFYDXXFIFQN-UHFFFAOYSA-N	232	C00062	Peptides & Amino Acids	Nitrogen Metabolism, Urea Cycle, Polyamine Metabolism, Amino Acid Metabolism, Non-Aromatic Amino Acid Metabolism, Alkaloid Metabolism	Amino Acid, Carboxylic Acid, Amine, Biogenic Amine	Proteinogenic Amino Acid, Polyamine, Guanidine-type Amine, Monocarboxylic Acid
Platform 3 (Primary Metabolites)	267	phenylethylamine	Phenethylamine	BHHGXPLMPWCGHP-UHFFFAOYSA-N	1001	C05332	Phenolics	Amino Acid Metabolism, Aromatic Amino Acid Metabolism, Phenylalanine Metabolism, Alkaloid Metabolism	Amine, Biogenic Amine, Alkaloid	Protoalkaloid (Amino Acid Derived w/ Side-chain Amine), Phenolic Amine, Monoamine
Platform 3 (Primary Metabolites)	225	xanthine	xanthic acid	LRFVTYWOQMYALW-UHFFFAOYSA-N	1188	C00385	Nucleic Acids	Nucleotide and Nucleoside Metabolism, Purine Metabolism, Alkaloid Metabolism	Purine, Nucleobase	Purine Nucleobase
Platform 3 (Primary Metabolites)	228	uric acid	urate	LEHOTFFKMJEONL-UHFFFAOYSA-N	1175	C00366	Nucleic Acids	Nucleotide and Nucleoside Metabolism, Purine Metabolism	Purine	Purine, Urate
Platform 2 (Polyphenols and fatty acids)	62	Ginkgotoxin	4-Methoxypyridoxine	SVINQHQHARVZFF-UHFFFAOYSA-N	76581	NA	Alkaloids	Alkaloid Metabolism, Vitamin Metabolism, Vitamin B6 Metabolism, Cofactor Metabolism	Alkaloid	Pyridine Alkaloid, Antivitamin
Platform 2 (Polyphenols and fatty acids)	131	3-Pyridinemethanol	Nicotinyl alcohol	MVQVNTPHUGQQHK-UHFFFAOYSA-N	7510	NA	Alkaloids	Alkaloid Metabolism, Vitamin Metabolism, Vitamin B3 Metabolism, Nicotinate and Nicotinamide metabolism, Cofactor Metabolism	Alkaloid, True Alkaloid (Amino Acid Derived w/ Nitrogen Heterocycle), Biogenic Amine	Pyridine Alkaloid, Monoamine
Platform 3 (Primary Metabolites)	374	2,3-dihydroxypyridine	Pyridine-2,3-diol	GGOZGYRTNQBSSA-UHFFFAOYSA-N	28115	NA	Alkaloids	Alkaloid Metabolism	Alkaloid, True Alkaloid (Amino Acid Derived w/ Nitrogen Heterocycle), Biogenic Amine	Pyridine Alkaloid, Monoamine
Platform 3 (Primary Metabolites)	345	butyrolactam	Pyrrolidone	HNJBEVLQSNELDL-UHFFFAOYSA-N	12025	NA	Alkaloids	Alkaloid Metabolism, Amino Acid Metabolism, Non-Aromatic Amino Acid Metabolism	Alkaloid, True Alkaloid (Amino Acid Derived w/ Nitrogen Heterocycle), Biogenic Amine	Pyrrolidane Alkaloid, Monoamine, Lactam, gamma-Lactam
Platform 2 (Polyphenols and fatty acids)	92	Choline cation	choline	OEYIOHPDSNJKLS-UHFFFAOYSA-N	305	C00114	Carbohydrates	Lipid Metabolism, Glyceride Metabolism, Phospholipid Metabolism, Cell Membrane Metabolism, Amino Acid Metabolism, Non-Aromatic Amino Acid Metabolism	Ammonium Compound, Alcohol	Quaternary Ammonium Compound
Platform 2 (Polyphenols and fatty acids)	175	1,2,3,4-Tetrahydro-6-quinolinecarboxylic acid	Tetrahydroquinoline-6-carboxylic acid	ARNALYPZOYPNAF-UHFFFAOYSA-N	2779641	NA	Alkaloids	Alkaloid Metabolism, Amino Acid Metabolism, Aromatic Amino Acid Metabolism	Alkaloid, True Alkaloid (Amino Acid Derived w/ Nitrogen Heterocycle), Biogenic Amine	Quinoline Alkaloid, Monoamine
Platform 3 (Primary Metabolites)	357	adenosine	NA	OIRDTQYFTABQOQ-KQYNXXCUSA-N	60961	C00212	Nucleic Acids	Nucleotide and Nucleoside Metabolism, Purine Metabolism	Purine, Nucleoside, Glycosamine	Ribonucleoside, Purine Ribonucleoside
Platform 2 (Polyphenols and fatty acids)	96	Ambrosic acid	NA	ZONXEWIGPLHXNT-ULEBWITMSA-N	75368818	NA	Lipids	Terpenoid Metabolism, Tetraterpenoid (Carotenoid & Apocarotenoid) Metabolism, Plant Hormone Metabolism, Abscisic Acid Metabolism	Terpenoid/Isoprenoid	Sesquiterpenoid (L1), Polycyclic Sesquiterpenoid (L2)	Terpenoids
Platform 2 (Polyphenols and fatty acids)	116	4,4,7a-Trimethyl-3a,5,6,7-tetrahydro-3H-indene-1-carboxylic acid	NA	ACQRUPZAAPLQQP-UHFFFAOYSA-N	51136570	NA	Lipids	Terpenoid Metabolism, Tetraterpenoid (Carotenoid & Apocarotenoid) Metabolism, Plant Hormone Metabolism, Abscisic Acid Metabolism	Terpenoid/Isoprenoid	Sesquiterpenoid (L1), Polycyclic Sesquiterpenoid (L2)	Terpenoids
Platform 2 (Polyphenols and fatty acids)	214	((1R,4S,5R,8S,9R)-4-Isopropyl-6,8,9-trimethyl-3-oxabicyclo[3.3.1]non-6-en-1-yl)methanol	NA	BNAPJYMSXNSYQF-HLTWPCROSA-N	16395991	NA	Lipids	Terpenoid Metabolism, Tetraterpenoid (Carotenoid & Apocarotenoid) Metabolism, Plant Hormone Metabolism, Abscisic Acid Metabolism	Terpenoid/Isoprenoid	Sesquiterpenoid (L1), Polycyclic Sesquiterpenoid (L2)	Terpenoids
Platform 2 (Polyphenols and fatty acids)	215	(-)-Globulol	NA	AYXPYQRXGNDJFU-QTPLKFIXSA-N	12304985	NA	Lipids	Terpenoid Metabolism, Tetraterpenoid (Carotenoid & Apocarotenoid) Metabolism, Plant Hormone Metabolism, Abscisic Acid Metabolism	Terpenoid/Isoprenoid	Sesquiterpenoid (L1), Polycyclic Sesquiterpenoid (L2)	Terpenoids
Platform 1 (Lipids)	396	Cer d34:2	NA	XXWRZIYYFPIQHE-XPAOSYCESA-N	52931118	NA	Lipids	Sphingolipid Metabolism, Cell Membrane Metabolism	Sphingolipid	Simple Sphingolipid (Sphingoid Bases & Ceramides) (L1), Ceramide (L2)	Sphingolipids
Platform 1 (Lipids)	397	Cer d40:0	NA	SXPRAKSDHOEHIG-ZESVVUHVSA-N	5283575	NA	Lipids	Sphingolipid Metabolism, Cell Membrane Metabolism	Sphingolipid	Simple Sphingolipid (Sphingoid Bases & Ceramides) (L1), Ceramide (L2)	Sphingolipids
Platform 1 (Lipids)	398	Cer d41:1	NA	NAJHAHQNQCNWOP-PUYNVXOJSA-N	52931115	NA	Lipids	Sphingolipid Metabolism, Cell Membrane Metabolism	Sphingolipid	Simple Sphingolipid (Sphingoid Bases & Ceramides) (L1), Ceramide (L2)	Sphingolipids
Platform 1 (Lipids)	399	Cer d42:1	NA	ZJVVOYPTFQEGPH-AUTSUKAISA-N	5283571	NA	Lipids	Sphingolipid Metabolism, Cell Membrane Metabolism	Sphingolipid	Simple Sphingolipid (Sphingoid Bases & Ceramides) (L1), Ceramide (L2)	Sphingolipids
Platform 1 (Lipids)	379	Cer 34:2;3O|Cer 18:2;2O/16:0;O	NA	BGCIWBMYVKHZNX-UHFFFAOYSA-N	25201513	NA	Lipids	Sphingolipid Metabolism, Cell Membrane Metabolism	Sphingolipid	Simple Sphingolipid (Sphingoid Bases & Ceramides) (L1), Ceramide (L2)	Sphingolipids
Platform 1 (Lipids)	380	Cer 40:1;3O|Cer 18:1;3O/22:0	NA	NKJMWDBSQFISEX-UHFFFAOYSA-N	71344020	NA	Lipids	Sphingolipid Metabolism, Cell Membrane Metabolism	Sphingolipid	Simple Sphingolipid (Sphingoid Bases & Ceramides) (L1), Ceramide (L2)	Sphingolipids
Platform 1 (Lipids)	381	Cer 40:1;4O|Cer 18:1;3O/22:0;(2OH)	NA	SUIXAFDIHPOBSV-UHFFFAOYSA-N	162987750	NA	Lipids	Sphingolipid Metabolism, Cell Membrane Metabolism	Sphingolipid	Simple Sphingolipid (Sphingoid Bases & Ceramides) (L1), Ceramide (L2)	Sphingolipids
Platform 1 (Lipids)	382	Cer 40:1;4O|Cer 23:1;3O/17:0;(2OH)	NA	HKMSUOWJVKXALZ-UHFFFAOYSA-N		NA	Lipids	Sphingolipid Metabolism, Cell Membrane Metabolism	Sphingolipid	Simple Sphingolipid (Sphingoid Bases & Ceramides) (L1), Ceramide (L2)	Sphingolipids
Platform 1 (Lipids)	383	Cer 41:0;4O|Cer 18:0;3O/23:0;(2OH)	NA	LXCDJSOYWPJYDC-UHFFFAOYSA-N	25200791	NA	Lipids	Sphingolipid Metabolism, Cell Membrane Metabolism	Sphingolipid	Simple Sphingolipid (Sphingoid Bases & Ceramides) (L1), Ceramide (L2)	Sphingolipids
Platform 1 (Lipids)	384	Cer 41:1;3O|Cer 25:0;2O/16:1;(2OH)	NA	HTCBQNNYWCRTET-UHFFFAOYSA-N		NA	Lipids	Sphingolipid Metabolism, Cell Membrane Metabolism	Sphingolipid	Simple Sphingolipid (Sphingoid Bases & Ceramides) (L1), Ceramide (L2)	Sphingolipids
Platform 1 (Lipids)	385	Cer 41:1;4O|Cer 18:1;3O/23:0;(2OH)	NA	TYVDMHBPUUFNQL-UHFFFAOYSA-N	163060605	NA	Lipids	Sphingolipid Metabolism, Cell Membrane Metabolism	Sphingolipid	Simple Sphingolipid (Sphingoid Bases & Ceramides) (L1), Ceramide (L2)	Sphingolipids
Platform 1 (Lipids)	386	Cer 42:0;3O|Cer 18:0;3O/24:0	NA	ZESJDNWGTANZCC-UHFFFAOYSA-N	14653935	NA	Lipids	Sphingolipid Metabolism, Cell Membrane Metabolism	Sphingolipid	Simple Sphingolipid (Sphingoid Bases & Ceramides) (L1), Ceramide (L2)	Sphingolipids
Platform 1 (Lipids)	387	Cer 42:0;4O|Cer 18:0;3O/24:0;(2OH)	NA	ZFUXWVVVWGWGPQ-UHFFFAOYSA-N	25203220	NA	Lipids	Sphingolipid Metabolism, Cell Membrane Metabolism	Sphingolipid	Simple Sphingolipid (Sphingoid Bases & Ceramides) (L1), Ceramide (L2)	Sphingolipids
Platform 1 (Lipids)	388	Cer 42:1;3O|Cer 18:1;3O/24:0	NA	WLPNRZCQBKEKIH-UHFFFAOYSA-N	85644974	NA	Lipids	Sphingolipid Metabolism, Cell Membrane Metabolism	Sphingolipid	Simple Sphingolipid (Sphingoid Bases & Ceramides) (L1), Ceramide (L2)	Sphingolipids
Platform 1 (Lipids)	389	Cer 42:1;4O|Cer 18:1;3O/24:0;(2OH)	NA	BIVGPKIBTGZJJH-UHFFFAOYSA-N	91485534	NA	Lipids	Sphingolipid Metabolism, Cell Membrane Metabolism	Sphingolipid	Simple Sphingolipid (Sphingoid Bases & Ceramides) (L1), Ceramide (L2)	Sphingolipids
Platform 1 (Lipids)	390	Cer 43:1;3O|Cer 18:1;3O/25:0	NA	VROFEAHIQIWNEJ-UHFFFAOYSA-N	163017103	NA	Lipids	Sphingolipid Metabolism, Cell Membrane Metabolism	Sphingolipid	Simple Sphingolipid (Sphingoid Bases & Ceramides) (L1), Ceramide (L2)	Sphingolipids
Platform 1 (Lipids)	391	Cer 43:1;4O|Cer 18:1;3O/25:0;(2OH)	NA	PBLGRAOOBKNRGK-UHFFFAOYSA-N	162977579	NA	Lipids	Sphingolipid Metabolism, Cell Membrane Metabolism	Sphingolipid	Simple Sphingolipid (Sphingoid Bases & Ceramides) (L1), Ceramide (L2)	Sphingolipids
Platform 1 (Lipids)	392	Cer 44:1;3O|Cer 18:1;3O/26:0	NA	BNTSRXHBAPIDEL-UHFFFAOYSA-N	NA	NA	Lipids	Sphingolipid Metabolism, Cell Membrane Metabolism	Sphingolipid	Simple Sphingolipid (Sphingoid Bases & Ceramides) (L1), Ceramide (L2)	Sphingolipids
Platform 1 (Lipids)	393	Cer 44:1;4O|Cer 18:1;3O/26:0;(2OH)	NA	KRLRTEPRANCGSV-UHFFFAOYSA-N	NA	NA	Lipids	Sphingolipid Metabolism, Cell Membrane Metabolism	Sphingolipid	Simple Sphingolipid (Sphingoid Bases & Ceramides) (L1), Ceramide (L2)	Sphingolipids
Platform 1 (Lipids)	394	Cer 57:9;4O|Cer 16:1;2O/41:8;2O	NA	XWYSYZDCCBINGR-UHFFFAOYSA-N	NA	NA	Lipids	Sphingolipid Metabolism, Cell Membrane Metabolism	Sphingolipid	Simple Sphingolipid (Sphingoid Bases & Ceramides) (L1), Ceramide (L2)	Sphingolipids
Platform 1 (Lipids)	395	Cer 59:12;4O|Cer 18:3;2O/41:9;2O	NA	XTBDBNPRNHJNHY-UHFFFAOYSA-N	NA	NA	Lipids	Sphingolipid Metabolism, Cell Membrane Metabolism	Sphingolipid	Simple Sphingolipid (Sphingoid Bases & Ceramides) (L1), Ceramide (L2)	Sphingolipids
Platform 2 (Polyphenols and fatty acids)	24	Phytosphingosine	4-D-Hydroxysphinganine	AERBNCYCJBRYDG-KSZLIROESA-N	122121	C12144	Lipids	Sphingolipid Metabolism, Cell Membrane Metabolism	Sphingolipid	Simple Sphingolipid (Sphingoid Bases & Ceramides) (L1), Sphingoid Base (L2)	Sphingolipids
Platform 3 (Primary Metabolites)	336	D-erythro-sphingosine	Sphingosine	WWUZIQQURGPMPG-KRWOKUGFSA-N	5280335	C00319	Lipids	Sphingolipid Metabolism, Cell Membrane Metabolism	Sphingolipid	Simple Sphingolipid (Sphingoid Bases & Ceramides) (L1), Sphingoid Base (L2)	Sphingolipids
Platform 1 (Lipids)	378	CE 20:2	NA	REFJKOQDWJELKE-NJJZEKHRSA-N	16061338	C02530	Lipids	Terpenoid Metabolism, Tetraterpenoid (Carotenoid & Apocarotenoid) Metabolism, Plant Hormone Metabolism, Abscisic Acid Metabolism	Terpenoid/Isoprenoid	Sterol (L1), Phytosterol (L2)	Terpenoids
Platform 1 (Lipids)	483	ST 29:1;O	(-)-.beta.-Sitosterol	KZJWDPNRJALLNS-UHFFFAOYSA-N	86821	C01753	Lipids	Terpenoid Metabolism, Tetraterpenoid (Carotenoid & Apocarotenoid) Metabolism, Plant Hormone Metabolism, Abscisic Acid Metabolism	Terpenoid/Isoprenoid	Sterol (L1), Phytosterol (L2)	Terpenoids
Platform 3 (Primary Metabolites)	346	beta-sitosterol	Sitosterol	KZJWDPNRJALLNS-VJSFXXLFSA-N	222284	C01753	Lipids	Terpenoid Metabolism, Tetraterpenoid (Carotenoid & Apocarotenoid) Metabolism, Plant Hormone Metabolism, Abscisic Acid Metabolism	Terpenoid/Isoprenoid	Sterol (L1), Phytosterol (L2)	Terpenoids
Platform 3 (Primary Metabolites)	304	inositol-4-monophosphate	Inositol 4-phosphate	INAPMGSXUVUWAF-GFWFORPUSA-N	440043	C03546	Carbohydrates	Sugar Metabolism, Sugar (Mono- and di-saccharide) Metabolism, Sugar Phosphate Metabolism, Phosphatidylinositol Signaling	Sugar Phosphate	Sugar Phosphate, Hexose Phosphate
Platform 3 (Primary Metabolites)	318	glucose-1-phosphate	alpha-D-Glucose 1-phosphate	HXXFSFRBOHSIMQ-VFUOTHLCSA-N	65533	C00103	Carbohydrates	Sugar Metabolism, Sugar (Mono- and di-saccharide) Metabolism, Sugar Phosphate Metabolism, Amino and Nucleotide Sugar Metabolism, Glycolysis/Gluconeogenesis, Starch Metabolism, Glycerolipid Metabolism	Sugar Phosphate	Sugar Phosphate, Hexose Phosphate
Platform 2 (Polyphenols and fatty acids)	107	7,8-Dihydro-.alpha.-ionone	alpha-Ionone	JHJCHCSUEGPIGE-UHFFFAOYSA-N	35821	C12286	Lipids	Terpenoid Metabolism, Tetraterpenoid (Carotenoid & Apocarotenoid) Metabolism, Plant Hormone Metabolism, Abscisic Acid Metabolism	Terpenoid/Isoprenoid	Tetraterpenoid (L1), Apocarotenoid (L2), Apocarotenoid Aglycone (L3)	Terpenoids
Platform 2 (Polyphenols and fatty acids)	154	2-cis-4-trans-Abscisic acid	(+)-Abscisic acid	JLIDBLDQVAYHNE-YKALOCIXSA-N	5280896	C06082	Lipids	Terpenoid Metabolism, Tetraterpenoid (Carotenoid & Apocarotenoid) Metabolism, Plant Hormone Metabolism, Abscisic Acid Metabolism	Terpenoid/Isoprenoid	Tetraterpenoid (L1), Apocarotenoid (L2), Apocarotenoid Aglycone (L3)	Terpenoids
Platform 2 (Polyphenols and fatty acids)	195	(E)-.alpha.-Ionone	α-Ionone	UZFLPKAIBPNNCA-BQYQJAHWSA-N	5282108	C12286	Lipids	Terpenoid Metabolism, Tetraterpenoid (Carotenoid & Apocarotenoid) Metabolism, Plant Hormone Metabolism, Abscisic Acid Metabolism	Terpenoid/Isoprenoid	Tetraterpenoid (L1), Apocarotenoid (L2), Apocarotenoid Aglycone (L3)	Terpenoids
Platform 2 (Polyphenols and fatty acids)	213	(+)-Abscisic acid	Abscisate	JLIDBLDQVAYHNE-LXGGSRJLSA-N	5280896	C06082	Lipids	Terpenoid Metabolism, Tetraterpenoid (Carotenoid & Apocarotenoid) Metabolism, Plant Hormone Metabolism, Abscisic Acid Metabolism	Terpenoid/Isoprenoid	Tetraterpenoid (L1), Apocarotenoid (L2), Apocarotenoid Aglycone (L3)	Terpenoids
Platform 2 (Polyphenols and fatty acids)	73	Docynicaside A	NA	LYJZPTUVRHPVNB-WRZQMYAXSA-N	45360253	NA	Lipids	Terpenoid Metabolism, Tetraterpenoid (Carotenoid & Apocarotenoid) Metabolism, Plant Hormone Metabolism, Abscisic Acid Metabolism	Terpenoid/Isoprenoid	Tetraterpenoid (L1), Apocarotenoid (L2), Apocarotenoid Glycone (L3)	Terpenoids
Platform 2 (Polyphenols and fatty acids)	122	4-(4-Hydroxy-2,6,6-trimethylcyclohex-1-en-1-yl)butan-2-yl .beta.-D-glucopyranoside	NA	QOLJILMTPKQQQA-KWEBYEANSA-N	51136504	NA	Lipids	Terpenoid Metabolism, Tetraterpenoid (Carotenoid & Apocarotenoid) Metabolism, Plant Hormone Metabolism, Abscisic Acid Metabolism	Terpenoid/Isoprenoid	Tetraterpenoid (L1), Apocarotenoid (L2), Apocarotenoid Glycone (L3)	Terpenoids
Platform 2 (Polyphenols and fatty acids)	123	4-(2,6,6-Trimethyl-4-oxocyclohex-2-en-1-yl)butan-2-yl 6-O-(3,4,5-trihydroxybenzoyl)hexopyranoside	NA	CBGLETFGTARBGG-UHFFFAOYSA-N	51136595	NA	Lipids	Terpenoid Metabolism, Tetraterpenoid (Carotenoid & Apocarotenoid) Metabolism, Plant Hormone Metabolism, Abscisic Acid Metabolism	Terpenoid/Isoprenoid	Tetraterpenoid (L1), Apocarotenoid (L2), Apocarotenoid Glycone (L3)	Terpenoids
Platform 2 (Polyphenols and fatty acids)	124	4-(2,6,6-Trimethyl-3-oxocyclohex-1-en-1-yl)butan-2-yl .beta.-D-glucopyranoside	NA	MRTYYJWDYPABSE-CAOIYLRSSA-N	51136393	NA	Lipids	Terpenoid Metabolism, Tetraterpenoid (Carotenoid & Apocarotenoid) Metabolism, Plant Hormone Metabolism, Abscisic Acid Metabolism	Terpenoid/Isoprenoid	Tetraterpenoid (L1), Apocarotenoid (L2), Apocarotenoid Glycone (L3)	Terpenoids
Platform 2 (Polyphenols and fatty acids)	138	3-Buten-2-one, 4-[4-(.beta.-D-glucopyranosyloxy)-2-hydroxy-2,6,6-trimethylcyclohexylidene]-	NA	OSUSRWMGHUUXBY-OHWUEDFNSA-N	45783010	NA	Lipids	Terpenoid Metabolism, Tetraterpenoid (Carotenoid & Apocarotenoid) Metabolism, Plant Hormone Metabolism, Abscisic Acid Metabolism	Terpenoid/Isoprenoid	Tetraterpenoid (L1), Apocarotenoid (L2), Apocarotenoid Glycone (L3)	Terpenoids
Platform 2 (Polyphenols and fatty acids)	153	2-Cyclohexen-1-one, 4-[(1E)-3-(.beta.-D-glucopyranosyloxy)-1-buten-1-yl]-4-hydroxy-3,5,5-trimethyl-, (4S)-	3,5,5-Trimethyl-4beta-hydroxy-4-[3-(beta-D-glucopyranosyloxy)-1-butenyl]-2-cyclohexene-1-one	SWYRVCGNMNAFEK-CLCVOTHJSA-N	23757167	NA	Lipids	Terpenoid Metabolism, Tetraterpenoid (Carotenoid & Apocarotenoid) Metabolism, Plant Hormone Metabolism, Abscisic Acid Metabolism	Terpenoid/Isoprenoid	Tetraterpenoid (L1), Apocarotenoid (L2), Apocarotenoid Glycone (L3)	Terpenoids
Platform 2 (Polyphenols and fatty acids)	200	(4Z)-4-(2,6,6-Trimethyl-4-oxocyclohex-2-en-1-ylidene)butan-2-yl 6-O-.beta.-D-xylopyranosyl-.beta.-D-glucopyranoside	NA	RHMAUENMPZLXOX-OPCZWOBISA-N	129008951	NA	Lipids	Terpenoid Metabolism, Tetraterpenoid (Carotenoid & Apocarotenoid) Metabolism, Plant Hormone Metabolism, Abscisic Acid Metabolism	Terpenoid/Isoprenoid	Tetraterpenoid (L1), Apocarotenoid (L2), Apocarotenoid Glycone (L3)	Terpenoids
Platform 2 (Polyphenols and fatty acids)	203	(3E)-4-(1,2,4-Trihydroxy-2,6,6-trimethylcyclohexyl)but-3-en-2-yl hexopyranoside	NA	XZRJEYQBLXDNNU-AATRIKPKSA-N	71694406	NA	Lipids	Terpenoid Metabolism, Tetraterpenoid (Carotenoid & Apocarotenoid) Metabolism, Plant Hormone Metabolism, Abscisic Acid Metabolism	Terpenoid/Isoprenoid	Tetraterpenoid (L1), Apocarotenoid (L2), Apocarotenoid Glycone (L3)	Terpenoids
Platform 2 (Polyphenols and fatty acids)	204	(3E)-4-(1-Hydroxy-2,6,6-trimethyl-4-oxocyclohex-2-en-1-yl)but-3-en-2-yl 2-O-hexopyranosylhexopyranoside	NA	IVORNVLYHQXABJ-AATRIKPKSA-N	129008966	NA	Lipids	Terpenoid Metabolism, Tetraterpenoid (Carotenoid & Apocarotenoid) Metabolism, Plant Hormone Metabolism, Abscisic Acid Metabolism	Terpenoid/Isoprenoid	Tetraterpenoid (L1), Apocarotenoid (L2), Apocarotenoid Glycone (L3)	Terpenoids
Platform 2 (Polyphenols and fatty acids)	205	(3E)-4-(1-Hydroxy-2,2,6-trimethyl-4-oxocyclohexyl)but-3-en-2-yl .beta.-D-glucopyranoside	NA	QFTPTUOKFIIFJH-DXWZCJOSSA-N	102094422	NA	Lipids	Terpenoid Metabolism, Tetraterpenoid (Carotenoid & Apocarotenoid) Metabolism, Plant Hormone Metabolism, Abscisic Acid Metabolism	Terpenoid/Isoprenoid	Tetraterpenoid (L1), Apocarotenoid (L2), Apocarotenoid Glycone (L3)	Terpenoids
Platform 3 (Primary Metabolites)	333	erythronic acid lactone isomer	D-Erythronolactone	SGMJBNSHAZVGMC-PWNYCUMCSA-N	5325915	NA	Carbohydrates	Sugar Metabolism, Sugar (Mono- and di-saccharide) Metabolism, Lactone Metabolism	Monosaccharide, Lactone, Furan	Tetrose, Gamma-lactone
Platform 1 (Lipids)	484	TG 42:2	1-dodecanoyl-2-(9Z-tetradecenoyl)-3-(9Z-hexadecenoyl)-sn-glycerol	IDWYMMYRNPSLDA-NNBKTNTFSA-N	56937031	NA	Lipids	Glyceride Metabolism, Energy Storage (Lipid Droplet Metabolism)	Glycerolipid	Triacylglycerol (TG) (L1), Unsaturated Triacylglycerol (U-TG) (L2)	Glycerolipids
Platform 1 (Lipids)	488	TG 48:2	1-hexadecanoyl-2,3-di-(9Z-hexadecenoyl)-sn-glycerol	RUOVJPPUXXFZPC-YZEIBMOJSA-N	9543987	NA	Lipids	Glyceride Metabolism, Energy Storage (Lipid Droplet Metabolism)	Glycerolipid	Triacylglycerol (TG) (L1), Unsaturated Triacylglycerol (U-TG) (L2)	Glycerolipids
Platform 1 (Lipids)	489	TG 48:4 Isomer A	NA	GRAMQDDTGXQCSO-ZJPFCMILSA-N	NA	NA	Lipids	Glyceride Metabolism, Energy Storage (Lipid Droplet Metabolism)	Glycerolipid	Triacylglycerol (TG) (L1), Unsaturated Triacylglycerol (U-TG) (L2)	Glycerolipids
Platform 1 (Lipids)	490	TG 48:5	1-Myristoleoyl-2-homo-g-linolenoyl-3-myristoleoyl-glycerol	BVLOHNQJSSURJP-MOSGBEDGSA-N	131758979	NA	Lipids	Glyceride Metabolism, Energy Storage (Lipid Droplet Metabolism)	Glycerolipid	Triacylglycerol (TG) (L1), Unsaturated Triacylglycerol (U-TG) (L2)	Glycerolipids
Platform 1 (Lipids)	494	TG 49:3	1-tetradecanoyl-2-(9Z-heptadecenoyl)-3-(9Z,12Z-octadecadienoyl)-sn-glycerol	DIGMYZZFQSIQBD-PNLKURBTSA-N	56938088	NA	Lipids	Glyceride Metabolism, Energy Storage (Lipid Droplet Metabolism)	Glycerolipid	Triacylglycerol (TG) (L1), Unsaturated Triacylglycerol (U-TG) (L2)	Glycerolipids
Platform 1 (Lipids)	495	TG 50:0	1-stearoyl-2-myristoyl-3-stearoyl-glycerol	MARPCPMDFOPPJX-UHFFFAOYSA-N	545588	NA	Lipids	Glyceride Metabolism, Energy Storage (Lipid Droplet Metabolism)	Glycerolipid	Triacylglycerol (TG) (L1), Unsaturated Triacylglycerol (U-TG) (L2)	Glycerolipids
Platform 1 (Lipids)	496	TG 50:1	1,2-dihexadecanoyl-3-(9Z-octadecenoyl)-sn-glycerol	YHMDGPZOSGBQRH-YYSBDVFPSA-N	25240460	NA	Lipids	Glyceride Metabolism, Energy Storage (Lipid Droplet Metabolism)	Glycerolipid	Triacylglycerol (TG) (L1), Unsaturated Triacylglycerol (U-TG) (L2)	Glycerolipids
Platform 1 (Lipids)	497	TG 50:2	1,2-di-(9Z-hexadecenoyl)-3-octadecanoyl-sn-glycerol	QEZWFCZNHWUARW-XQCAQTCHSA-N	9544010	NA	Lipids	Glyceride Metabolism, Energy Storage (Lipid Droplet Metabolism)	Glycerolipid	Triacylglycerol (TG) (L1), Unsaturated Triacylglycerol (U-TG) (L2)	Glycerolipids
Platform 1 (Lipids)	498	TG 50:3 Isomer A	1,2-di-(9Z-hexadecenoyl)-3-(9Z-octadecenoyl)-sn-glycerol	UFHNZOACKFBCOM-YXKNDSBASA-N	25240357	NA	Lipids	Glyceride Metabolism, Energy Storage (Lipid Droplet Metabolism)	Glycerolipid	Triacylglycerol (TG) (L1), Unsaturated Triacylglycerol (U-TG) (L2)	Glycerolipids
Platform 1 (Lipids)	500	TG 50:4	1,2-di-(9Z-hexadecenoyl)-3-(9Z,12Z-octadecadienoyl)-sn-glycerol	PVMBAGXWHHZKFP-JMPJWMFJSA-N	25240359	NA	Lipids	Glyceride Metabolism, Energy Storage (Lipid Droplet Metabolism)	Glycerolipid	Triacylglycerol (TG) (L1), Unsaturated Triacylglycerol (U-TG) (L2)	Glycerolipids
Platform 1 (Lipids)	501	TG 50:5	1,2-di-(9Z-hexadecenoyl)-3-(9Z,12Z,15Z-octadecatrienoyl)-sn-glycerol	AFTBPUXZTDLRSP-UDQIKIEDSA-N	9544045	NA	Lipids	Glyceride Metabolism, Energy Storage (Lipid Droplet Metabolism)	Glycerolipid	Triacylglycerol (TG) (L1), Unsaturated Triacylglycerol (U-TG) (L2)	Glycerolipids
Platform 1 (Lipids)	502	TG 50:6	NA	YVQKDEFVOZTZOA-PVNINVEQSA-N	NA	NA	Lipids	Glyceride Metabolism, Energy Storage (Lipid Droplet Metabolism)	Glycerolipid	Triacylglycerol (TG) (L1), Unsaturated Triacylglycerol (U-TG) (L2)	Glycerolipids
Platform 1 (Lipids)	503	TG 51:1	1,2-diheptadecanoyl-3-(9Z-heptadecenoyl)-sn-glycerol	OZAXLAGNPZMZAD-BOEMPQCLSA-N	9544006	NA	Lipids	Glyceride Metabolism, Energy Storage (Lipid Droplet Metabolism)	Glycerolipid	Triacylglycerol (TG) (L1), Unsaturated Triacylglycerol (U-TG) (L2)	Glycerolipids
Platform 1 (Lipids)	504	TG 51:2	1-heptadecanoyl-2,3-di-(9Z-heptadecenoyl)-sn-glycerol	NSNSZGBCOIKUBU-SZOKBDNISA-N	9544013	NA	Lipids	Glyceride Metabolism, Energy Storage (Lipid Droplet Metabolism)	Glycerolipid	Triacylglycerol (TG) (L1), Unsaturated Triacylglycerol (U-TG) (L2)	Glycerolipids
Platform 1 (Lipids)	505	TG 51:3	1,2,3-tri-(9Z-heptadecenoyl)-glycerol	ISSGPXMQOMAFMJ-DMGKHJLRSA-N	9544023	NA	Lipids	Glyceride Metabolism, Energy Storage (Lipid Droplet Metabolism)	Glycerolipid	Triacylglycerol (TG) (L1), Unsaturated Triacylglycerol (U-TG) (L2)	Glycerolipids
Platform 1 (Lipids)	506	TG 51:4	1-(9Z-hexadecenoyl)-2-(9Z,12Z-heptadecadienoyl)-3-(9Z-octadecenoyl)-sn-glycerol	IIRQXNVLAXQEKB-KBEZCZBDSA-N	9544052	NA	Lipids	Glyceride Metabolism, Energy Storage (Lipid Droplet Metabolism)	Glycerolipid	Triacylglycerol (TG) (L1), Unsaturated Triacylglycerol (U-TG) (L2)	Glycerolipids
Platform 1 (Lipids)	507	TG 51:5	NA	DYYKLAQWCNBXRJ-UNZGPCCPSA-N	NA	NA	Lipids	Glyceride Metabolism, Energy Storage (Lipid Droplet Metabolism)	Glycerolipid	Triacylglycerol (TG) (L1), Unsaturated Triacylglycerol (U-TG) (L2)	Glycerolipids
Platform 1 (Lipids)	508	TG 51:6|TG 15:1_18:2_18:3	NA	UHOYSFKFVXYJBU-UHFFFAOYSA-N	NA	NA	Lipids	Glyceride Metabolism, Energy Storage (Lipid Droplet Metabolism)	Glycerolipid	Triacylglycerol (TG) (L1), Unsaturated Triacylglycerol (U-TG) (L2)	Glycerolipids
Platform 1 (Lipids)	509	TG 52:1	1-O-Palmitoyl-2-O-stearoyl-3-O-oleoylglycerol	NPCZZYKITFKRQZ-RFBIWTDZSA-N	5365005	NA	Lipids	Glyceride Metabolism, Energy Storage (Lipid Droplet Metabolism)	Glycerolipid	Triacylglycerol (TG) (L1), Unsaturated Triacylglycerol (U-TG) (L2)	Glycerolipids
Platform 1 (Lipids)	510	TG 52:1|TG 8:0_22:0_22:1	NA	NKAJUMHCINDCGW-UHFFFAOYSA-N	NA	NA	Lipids	Glyceride Metabolism, Energy Storage (Lipid Droplet Metabolism)	Glycerolipid	Triacylglycerol (TG) (L1), Unsaturated Triacylglycerol (U-TG) (L2)	Glycerolipids
Platform 1 (Lipids)	511	TG 52:2	1-tetradecanoyl-2-(9Z,12Z-octadecadienoyl)-3-eicosanoyl-sn-glycerol	TXMWKTABZBAJCW-QLHBUVOUSA-N	56938176	NA	Lipids	Glyceride Metabolism, Energy Storage (Lipid Droplet Metabolism)	Glycerolipid	Triacylglycerol (TG) (L1), Unsaturated Triacylglycerol (U-TG) (L2)	Glycerolipids
Platform 1 (Lipids)	512	TG 52:3	1-tetradecanoyl-2-(9Z,12Z-octadecadienoyl)-3-(11Z-eicosenoyl)-sn-glycerol	DQXQIWIQYYEGLG-MMWLGPPDSA-N	56938177	NA	Lipids	Glyceride Metabolism, Energy Storage (Lipid Droplet Metabolism)	Glycerolipid	Triacylglycerol (TG) (L1), Unsaturated Triacylglycerol (U-TG) (L2)	Glycerolipids
Platform 1 (Lipids)	513	TG 52:4	1-(9Z-hexadecenoyl)-2-(9Z-octadecenoyl)-3-(9Z,12Z-octadecadienoyl)-sn-glycerol	WHSWXEYWNPTUPW-HNJDVRDNSA-N	25240364	NA	Lipids	Glyceride Metabolism, Energy Storage (Lipid Droplet Metabolism)	Glycerolipid	Triacylglycerol (TG) (L1), Unsaturated Triacylglycerol (U-TG) (L2)	Glycerolipids
Platform 1 (Lipids)	516	TG 52:4|TG 16:0_18:2_18:2	1,2-Dilinoleoyl-3-palmitoyl-rac-glycerol	LXAWUIOWWNQCQA-UHFFFAOYSA-N	3643890	NA	Lipids	Glyceride Metabolism, Energy Storage (Lipid Droplet Metabolism)	Glycerolipid	Triacylglycerol (TG) (L1), Unsaturated Triacylglycerol (U-TG) (L2)	Glycerolipids
Platform 1 (Lipids)	517	TG 52:4|TG 19:0_15:1_18:3	NA	NSWONTPAOJSMGG-UHFFFAOYSA-N	NA	NA	Lipids	Glyceride Metabolism, Energy Storage (Lipid Droplet Metabolism)	Glycerolipid	Triacylglycerol (TG) (L1), Unsaturated Triacylglycerol (U-TG) (L2)	Glycerolipids
Platform 1 (Lipids)	518	TG 52:5	1-(9Z-hexadecenoyl)-2,3-di-(9Z,12Z-octadecadienoyl)-sn-glycerol	CQZAAIKPSLHIBC-KDJOUNIJSA-N	25240366	NA	Lipids	Glyceride Metabolism, Energy Storage (Lipid Droplet Metabolism)	Glycerolipid	Triacylglycerol (TG) (L1), Unsaturated Triacylglycerol (U-TG) (L2)	Glycerolipids
Platform 1 (Lipids)	521	TG 52:6	1-tetradecanoyl-2-(9Z,12Z-octadecadienoyl)-3-(5Z,8Z,11Z,14Z-eicosatetraenoyl)-sn-glycerol	SSOSFUDNINFYLJ-KIYGNKBKSA-N	56938180	NA	Lipids	Glyceride Metabolism, Energy Storage (Lipid Droplet Metabolism)	Glycerolipid	Triacylglycerol (TG) (L1), Unsaturated Triacylglycerol (U-TG) (L2)	Glycerolipids
Platform 1 (Lipids)	523	TG 52:7|TG 16:2_18:2_18:3	NA	GLZHPWPMVDTTOB-UHFFFAOYSA-N	NA	NA	Lipids	Glyceride Metabolism, Energy Storage (Lipid Droplet Metabolism)	Glycerolipid	Triacylglycerol (TG) (L1), Unsaturated Triacylglycerol (U-TG) (L2)	Glycerolipids
Platform 1 (Lipids)	524	TG 52:8|TG 16:2_18:3_18:3	NA	CVTYUBZRISQRAD-UHFFFAOYSA-N	NA	NA	Lipids	Glyceride Metabolism, Energy Storage (Lipid Droplet Metabolism)	Glycerolipid	Triacylglycerol (TG) (L1), Unsaturated Triacylglycerol (U-TG) (L2)	Glycerolipids
Platform 1 (Lipids)	525	TG 53:1	1-(9Z-heptadecenoyl)-2,3-dioctadecanoyl-sn-glycerol	WWJIBIGWKGFVAQ-JNSYTQKUSA-N	9544081	NA	Lipids	Glyceride Metabolism, Energy Storage (Lipid Droplet Metabolism)	Glycerolipid	Triacylglycerol (TG) (L1), Unsaturated Triacylglycerol (U-TG) (L2)	Glycerolipids
Platform 1 (Lipids)	526	TG 53:2	1-(9Z,12Z-heptadecadienoyl)-2,3-dioctadecanoyl-sn-glycerol	RSINITWKVQRWSZ-RFVLVDBCSA-N	9544102	NA	Lipids	Glyceride Metabolism, Energy Storage (Lipid Droplet Metabolism)	Glycerolipid	Triacylglycerol (TG) (L1), Unsaturated Triacylglycerol (U-TG) (L2)	Glycerolipids
Platform 1 (Lipids)	527	TG 53:3	1-(9Z-heptadecenoyl)-2,3-di-(9Z-octadecenoyl)-sn-glycerol	ZNQBEJJYVJSZLM-LEDQTTRKSA-N	9544126	NA	Lipids	Glyceride Metabolism, Energy Storage (Lipid Droplet Metabolism)	Glycerolipid	Triacylglycerol (TG) (L1), Unsaturated Triacylglycerol (U-TG) (L2)	Glycerolipids
Platform 1 (Lipids)	528	TG 53:4	1-(9Z,12Z-heptadecadienoyl)-2,3-di-(9Z-octadecenoyl)-sn-glycerol	BMSDHYZLQWTKSQ-LSJAAEOESA-N	9544152	NA	Lipids	Glyceride Metabolism, Energy Storage (Lipid Droplet Metabolism)	Glycerolipid	Triacylglycerol (TG) (L1), Unsaturated Triacylglycerol (U-TG) (L2)	Glycerolipids
Platform 1 (Lipids)	529	TG 53:5	1-(9Z-heptadecenoyl)-2,3-di-(9Z,12Z-octadecadienoyl)-sn-glycerol	QHYAATSKYBYSLG-BXDFBOBBSA-N	9544183	NA	Lipids	Glyceride Metabolism, Energy Storage (Lipid Droplet Metabolism)	Glycerolipid	Triacylglycerol (TG) (L1), Unsaturated Triacylglycerol (U-TG) (L2)	Glycerolipids
Platform 1 (Lipids)	530	TG 53:6|TG 17:1_18:2_18:3	NA	CRAKBYXKEQVYKV-UHFFFAOYSA-N	NA	NA	Lipids	Glyceride Metabolism, Energy Storage (Lipid Droplet Metabolism)	Glycerolipid	Triacylglycerol (TG) (L1), Unsaturated Triacylglycerol (U-TG) (L2)	Glycerolipids
Platform 1 (Lipids)	531	TG 54:0	1-Arachidonyl-2-myristoyl-3-arachidonyl-glycerol	KKBWDSMULWDHME-UHFFFAOYSA-N	131756478	NA	Lipids	Glyceride Metabolism, Energy Storage (Lipid Droplet Metabolism)	Glycerolipid	Triacylglycerol (TG) (L1), Unsaturated Triacylglycerol (U-TG) (L2)	Glycerolipids
Platform 1 (Lipids)	532	TG 54:1	1,2-dioctadecanoyl-3-(9Z-octadecenoyl)-sn-glycerol	YFFIQXNTTVSKJC-NZEOUKRFSA-N	16058371	NA	Lipids	Glyceride Metabolism, Energy Storage (Lipid Droplet Metabolism)	Glycerolipid	Triacylglycerol (TG) (L1), Unsaturated Triacylglycerol (U-TG) (L2)	Glycerolipids
Platform 1 (Lipids)	533	TG 54:2	1-tetradecanoyl-2-(9Z,12Z-octadecadienoyl)-3-docosanoyl-sn-glycerol	WUUWGORPQFKFQN-XDVOZUNOSA-N	56938183	NA	Lipids	Glyceride Metabolism, Energy Storage (Lipid Droplet Metabolism)	Glycerolipid	Triacylglycerol (TG) (L1), Unsaturated Triacylglycerol (U-TG) (L2)	Glycerolipids
Platform 1 (Lipids)	534	TG 54:3	Glycerol trioleate	PHYFQTYBJUILEZ-IUPFWZBJSA-N	5497163	NA	Lipids	Glyceride Metabolism, Energy Storage (Lipid Droplet Metabolism)	Glycerolipid	Triacylglycerol (TG) (L1), Unsaturated Triacylglycerol (U-TG) (L2)	Glycerolipids
Platform 1 (Lipids)	535	TG 54:4	1-octadecanoyl-2-(9Z-octadecenoyl)-3-(9Z,12Z,15Z-octadecatrienoyl)-sn-glycerol	BRLGHZXETDWABO-NOFIOOQLSA-N	9544255	NA	Lipids	Glyceride Metabolism, Energy Storage (Lipid Droplet Metabolism)	Glycerolipid	Triacylglycerol (TG) (L1), Unsaturated Triacylglycerol (U-TG) (L2)	Glycerolipids
Platform 1 (Lipids)	537	TG 54:5 Isomer A	1,2-di-(9Z-octadecenoyl)-3-(9Z,12Z,15Z-octadecatrienoyl)-sn-glycerol	OEJXMJPFOHYSIU-GRLFFVHSSA-N	9544294	NA	Lipids	Glyceride Metabolism, Energy Storage (Lipid Droplet Metabolism)	Glycerolipid	Triacylglycerol (TG) (L1), Unsaturated Triacylglycerol (U-TG) (L2)	Glycerolipids
Platform 1 (Lipids)	539	TG 54:5|TG 18:1_18:2_18:2	(9Z,9'Z,12Z,12'Z)-3-(oleoyloxy)propane-1,2-diyl dioctadeca-9,12-dienoate	VVEBTVMJPTZDHO-UHFFFAOYSA-N	4123012	NA	Lipids	Glyceride Metabolism, Energy Storage (Lipid Droplet Metabolism)	Glycerolipid	Triacylglycerol (TG) (L1), Unsaturated Triacylglycerol (U-TG) (L2)	Glycerolipids
Platform 1 (Lipids)	540	TG 54:6 Isomer A	Glycerol trilinoleate	HBOQXIRUPVQLKX-BBWANDEASA-N	5322095	NA	Lipids	Glyceride Metabolism, Energy Storage (Lipid Droplet Metabolism)	Glycerolipid	Triacylglycerol (TG) (L1), Unsaturated Triacylglycerol (U-TG) (L2)	Glycerolipids
Platform 1 (Lipids)	544	TG 54:6|TG 18:1_18:2_18:3	(2-Octadeca-9,12-dienoyloxy-3-octadeca-9,12,15-trienoyloxypropyl) octadec-9-enoate	OTUIORVXGJUHBH-UHFFFAOYSA-N	72727554	NA	Lipids	Glyceride Metabolism, Energy Storage (Lipid Droplet Metabolism)	Glycerolipid	Triacylglycerol (TG) (L1), Unsaturated Triacylglycerol (U-TG) (L2)	Glycerolipids
Platform 1 (Lipids)	545	TG 54:7 Isomer A	NA	FHBCMIRRJOSJQM-NIVLNYKVSA-N	NA	NA	Lipids	Glyceride Metabolism, Energy Storage (Lipid Droplet Metabolism)	Glycerolipid	Triacylglycerol (TG) (L1), Unsaturated Triacylglycerol (U-TG) (L2)	Glycerolipids
Platform 1 (Lipids)	550	TG 54:8|TG 18:2_18:3_18:3	2,3-Di(octadeca-9,12,15-trienoyloxy)propyl octadeca-9,12-dienoate	IMPMCCKWZKDAGE-UHFFFAOYSA-N	74412275	NA	Lipids	Glyceride Metabolism, Energy Storage (Lipid Droplet Metabolism)	Glycerolipid	Triacylglycerol (TG) (L1), Unsaturated Triacylglycerol (U-TG) (L2)	Glycerolipids
Platform 1 (Lipids)	552	TG 54:9|TG 18:3_18:3_18:3	Propane-1,2,3-triyl trioctadeca-9,12,15-trienoate	UBEIMDKGOYBUKT-UHFFFAOYSA-N	123344	NA	Lipids	Glyceride Metabolism, Energy Storage (Lipid Droplet Metabolism)	Glycerolipid	Triacylglycerol (TG) (L1), Unsaturated Triacylglycerol (U-TG) (L2)	Glycerolipids
Platform 1 (Lipids)	553	TG 55:2	1-heptadecanoyl-2-(9Z,12Z-octadecadienoyl)-3-eicosanoyl-sn-glycerol	CVYIAUQQILDJFW-CRMWYYCDSA-N	9544263	NA	Lipids	Glyceride Metabolism, Energy Storage (Lipid Droplet Metabolism)	Glycerolipid	Triacylglycerol (TG) (L1), Unsaturated Triacylglycerol (U-TG) (L2)	Glycerolipids
Platform 1 (Lipids)	554	TG 55:3	1-heptadecanoyl-2-(9Z,12Z,15Z-octadecatrienoyl)-3-eicosanoyl-sn-glycerol	OKIXZSRPBSYGJA-JSSMPAPSSA-N	9544301	NA	Lipids	Glyceride Metabolism, Energy Storage (Lipid Droplet Metabolism)	Glycerolipid	Triacylglycerol (TG) (L1), Unsaturated Triacylglycerol (U-TG) (L2)	Glycerolipids
Platform 1 (Lipids)	555	TG 55:4|TG 19:0_18:2_18:2	NA	IYZMWOIQHCERKV-UHFFFAOYSA-N	NA	NA	Lipids	Glyceride Metabolism, Energy Storage (Lipid Droplet Metabolism)	Glycerolipid	Triacylglycerol (TG) (L1), Unsaturated Triacylglycerol (U-TG) (L2)	Glycerolipids
Platform 1 (Lipids)	556	TG 55:5|TG 19:1_18:2_18:2	NA	RSJQEUQJRFQHAE-UHFFFAOYSA-N	NA	NA	Lipids	Glyceride Metabolism, Energy Storage (Lipid Droplet Metabolism)	Glycerolipid	Triacylglycerol (TG) (L1), Unsaturated Triacylglycerol (U-TG) (L2)	Glycerolipids
Platform 1 (Lipids)	557	TG 56:0	1-Hexadecanoyl-2,3-dieicosanoyl-sn-glycerol	SXOXZWKQBXKGCG-LXXIDKMWSA-N	9544299	NA	Lipids	Glyceride Metabolism, Energy Storage (Lipid Droplet Metabolism)	Glycerolipid	Triacylglycerol (TG) (L1), Unsaturated Triacylglycerol (U-TG) (L2)	Glycerolipids
Platform 1 (Lipids)	558	TG 56:1	1-octadecanoyl-2-(9Z-octadecenoyl)-3-eicosanoyl-sn-glycerol	OCYFAHIHWCVZKS-FHSLLVMSSA-N	9544345	NA	Lipids	Glyceride Metabolism, Energy Storage (Lipid Droplet Metabolism)	Glycerolipid	Triacylglycerol (TG) (L1), Unsaturated Triacylglycerol (U-TG) (L2)	Glycerolipids
Platform 1 (Lipids)	560	TG 56:2	1-octadecanoyl-2-(9Z,12Z-octadecadienoyl)-3-eicosanoyl-sn-glycerol	PDEQUPGHMOMBFC-FYEHETCMSA-N	9544390	NA	Lipids	Glyceride Metabolism, Energy Storage (Lipid Droplet Metabolism)	Glycerolipid	Triacylglycerol (TG) (L1), Unsaturated Triacylglycerol (U-TG) (L2)	Glycerolipids
Platform 1 (Lipids)	561	TG 56:3	1,2-di-(9Z-octadecenoyl)-3-(11Z-eicosenoyl)-sn-glycerol	QXMHHXQBBKDSSL-BAQZNRHJSA-N	9544447	NA	Lipids	Glyceride Metabolism, Energy Storage (Lipid Droplet Metabolism)	Glycerolipid	Triacylglycerol (TG) (L1), Unsaturated Triacylglycerol (U-TG) (L2)	Glycerolipids
Platform 1 (Lipids)	562	TG 56:4	1-(9Z-octadecenoyl)-2-(9Z,12Z-octadecadienoyl)-3-(11Z-eicosenoyl)-sn-glycerol	YONCDTJKIZDSKQ-IYASBODOSA-N	25240379	NA	Lipids	Glyceride Metabolism, Energy Storage (Lipid Droplet Metabolism)	Glycerolipid	Triacylglycerol (TG) (L1), Unsaturated Triacylglycerol (U-TG) (L2)	Glycerolipids
Platform 1 (Lipids)	563	TG 56:5 Isomer B	1,2-di-(9Z,12Z-octadecadienoyl)-3-(11Z-eicosenoyl)-sn-glycerol	UHEJWASONFIROS-YPSHDQQVSA-N	25240380	NA	Lipids	Glyceride Metabolism, Energy Storage (Lipid Droplet Metabolism)	Glycerolipid	Triacylglycerol (TG) (L1), Unsaturated Triacylglycerol (U-TG) (L2)	Glycerolipids
Platform 1 (Lipids)	564	TG 56:6	1,2-di-(9Z,12Z-octadecadienoyl)-3-(11Z,14Z-eicosadienoyl)-sn-glycerol	ZTNDRFCABXFVMY-WJTCTALZSA-N	9544625	NA	Lipids	Glyceride Metabolism, Energy Storage (Lipid Droplet Metabolism)	Glycerolipid	Triacylglycerol (TG) (L1), Unsaturated Triacylglycerol (U-TG) (L2)	Glycerolipids
Platform 1 (Lipids)	565	TG 56:7 Isomer A	1,2-di-(9Z,12Z-octadecadienoyl)-3-(8Z,11Z,14Z-eicosatrienoyl)-sn-glycerol	DODZUDCYRVWEOJ-GKZBLMSTSA-N	9544695	NA	Lipids	Glyceride Metabolism, Energy Storage (Lipid Droplet Metabolism)	Glycerolipid	Triacylglycerol (TG) (L1), Unsaturated Triacylglycerol (U-TG) (L2)	Glycerolipids
Platform 1 (Lipids)	566	TG 57:1	NA	QLQFCWUGYPUXFE-MKFPQRGTSA-N	NA	NA	Lipids	Glyceride Metabolism, Energy Storage (Lipid Droplet Metabolism)	Glycerolipid	Triacylglycerol (TG) (L1), Unsaturated Triacylglycerol (U-TG) (L2)	Glycerolipids
Platform 1 (Lipids)	567	TG 57:2	NA	OQPANTOJGGHRCB-OEIGHXOUSA-N	NA	NA	Lipids	Glyceride Metabolism, Energy Storage (Lipid Droplet Metabolism)	Glycerolipid	Triacylglycerol (TG) (L1), Unsaturated Triacylglycerol (U-TG) (L2)	Glycerolipids
Platform 1 (Lipids)	570	TG 58:1	1-(9Z-octadecenoyl)-2,3-dieicosanoyl-sn-glycerol	OWZMHFAFGQCCNI-FBXRAONGSA-N	25240381	NA	Lipids	Glyceride Metabolism, Energy Storage (Lipid Droplet Metabolism)	Glycerolipid	Triacylglycerol (TG) (L1), Unsaturated Triacylglycerol (U-TG) (L2)	Glycerolipids
Platform 1 (Lipids)	571	TG 58:2	1-tetradecanoyl-2-docosanoyl-3-(13Z,16Z-docosadienoyl)-sn-glycerol	NFQQJRGJJVQGAV-MEADVOAOSA-N	56938341	NA	Lipids	Glyceride Metabolism, Energy Storage (Lipid Droplet Metabolism)	Glycerolipid	Triacylglycerol (TG) (L1), Unsaturated Triacylglycerol (U-TG) (L2)	Glycerolipids
Platform 1 (Lipids)	572	TG 58:3	1-(9Z-octadecenoyl)-2,3-di-(11Z-eicosenoyl)-sn-glycerol	RFMSTHTUAZETPD-JJPHLYBUSA-N	9544748	NA	Lipids	Glyceride Metabolism, Energy Storage (Lipid Droplet Metabolism)	Glycerolipid	Triacylglycerol (TG) (L1), Unsaturated Triacylglycerol (U-TG) (L2)	Glycerolipids
Platform 1 (Lipids)	573	TG 58:4	1-octadecanoyl-2-eicosanoyl-3-(5Z,8Z,11Z,14Z-eicosatetraenoyl)-sn-glycerol	CCKRHDUCFMOBKX-AAINFQTBSA-N	9544835	NA	Lipids	Glyceride Metabolism, Energy Storage (Lipid Droplet Metabolism)	Glycerolipid	Triacylglycerol (TG) (L1), Unsaturated Triacylglycerol (U-TG) (L2)	Glycerolipids
Platform 1 (Lipids)	574	TG 58:5	1-(9Z-octadecenoyl)-2-(9Z,12Z,15Z-octadecatrienoyl)-3-(13Z-docosenoyl)-sn-glycerol	OZFWPAAPEBTMLA-PPOKRNCZSA-N	9545084	NA	Lipids	Glyceride Metabolism, Energy Storage (Lipid Droplet Metabolism)	Glycerolipid	Triacylglycerol (TG) (L1), Unsaturated Triacylglycerol (U-TG) (L2)	Glycerolipids
Platform 1 (Lipids)	575	TG 58:6	1-(9Z-octadecenoyl)-2-(11Z-eicosenoyl)-3-(5Z,8Z,11Z,14Z-eicosatetraenoyl)-sn-glycerol	GSNFRUMSEHHPSY-LCXCSEBNSA-N	9544977	NA	Lipids	Glyceride Metabolism, Energy Storage (Lipid Droplet Metabolism)	Glycerolipid	Triacylglycerol (TG) (L1), Unsaturated Triacylglycerol (U-TG) (L2)	Glycerolipids
Platform 1 (Lipids)	576	TG 59:2	NA	ONQVFVNCAXIZPA-OEIGHXOUSA-N	NA	NA	Lipids	Glyceride Metabolism, Energy Storage (Lipid Droplet Metabolism)	Glycerolipid	Triacylglycerol (TG) (L1), Unsaturated Triacylglycerol (U-TG) (L2)	Glycerolipids
Platform 1 (Lipids)	577	TG 59:3	NA	GFWCWSZOZVIVJH-ZIURWEIWSA-N	NA	NA	Lipids	Glyceride Metabolism, Energy Storage (Lipid Droplet Metabolism)	Glycerolipid	Triacylglycerol (TG) (L1), Unsaturated Triacylglycerol (U-TG) (L2)	Glycerolipids
Platform 1 (Lipids)	579	TG 60:1	1-hexadecanoyl-2-docosanoyl-3-11Z-docosenoyl-sn-glycerol	GSRZYISFIMLZBJ-XOLZVBLYSA-N	56939577	NA	Lipids	Glyceride Metabolism, Energy Storage (Lipid Droplet Metabolism)	Glycerolipid	Triacylglycerol (TG) (L1), Unsaturated Triacylglycerol (U-TG) (L2)	Glycerolipids
Platform 1 (Lipids)	580	TG 60:2	1-eicosanoyl-2,3-di-(11Z-eicosenoyl)-sn-glycerol	QPNVLDQSHXVPMG-JMYPUKFOSA-N	9545040	NA	Lipids	Glyceride Metabolism, Energy Storage (Lipid Droplet Metabolism)	Glycerolipid	Triacylglycerol (TG) (L1), Unsaturated Triacylglycerol (U-TG) (L2)	Glycerolipids
Platform 1 (Lipids)	581	TG 60:3	NA	IJOXAPFYWITIHW-KUBXGBLDSA-N	NA	NA	Lipids	Glyceride Metabolism, Energy Storage (Lipid Droplet Metabolism)	Glycerolipid	Triacylglycerol (TG) (L1), Unsaturated Triacylglycerol (U-TG) (L2)	Glycerolipids
Platform 1 (Lipids)	582	TG 60:4	NA	WECVQMVSEHWZQR-ULZSGHTGSA-N	NA	NA	Lipids	Glyceride Metabolism, Energy Storage (Lipid Droplet Metabolism)	Glycerolipid	Triacylglycerol (TG) (L1), Unsaturated Triacylglycerol (U-TG) (L2)	Glycerolipids
Platform 1 (Lipids)	583	TG 60:5	1-(11Z-eicosenoyl)-2,3-di-(11Z,14Z-eicosadienoyl)-sn-glycerol	CTTAXJGEXQSTCM-CYNPQLDNSA-N	9545273	NA	Lipids	Glyceride Metabolism, Energy Storage (Lipid Droplet Metabolism)	Glycerolipid	Triacylglycerol (TG) (L1), Unsaturated Triacylglycerol (U-TG) (L2)	Glycerolipids
Platform 1 (Lipids)	584	TG 60:6	1-Homo-g-linolenoyl-2-arachidonyl-3-homo-g-linolenoyl-glycerol	ZMJSZQBPVUGYMY-KUCWVPRQSA-N	131764341	NA	Lipids	Glyceride Metabolism, Energy Storage (Lipid Droplet Metabolism)	Glycerolipid	Triacylglycerol (TG) (L1), Unsaturated Triacylglycerol (U-TG) (L2)	Glycerolipids
Platform 1 (Lipids)	585	TG 62:1	1-octadecanoyl-2-docosanoyl-3-11Z-docosenoyl-sn-glycerol	LVMLMFSAEKALSX-USTGQOLPSA-N	56939992	NA	Lipids	Glyceride Metabolism, Energy Storage (Lipid Droplet Metabolism)	Glycerolipid	Triacylglycerol (TG) (L1), Unsaturated Triacylglycerol (U-TG) (L2)	Glycerolipids
Platform 1 (Lipids)	586	TG 62:2	1-octadecanoyl-2-docosanoyl-3-(13Z,16Z-docosadienoyl)-sn-glycerol	KWGDKWYPTTYCLC-DEGBXDRHSA-N	9545831	NA	Lipids	Glyceride Metabolism, Energy Storage (Lipid Droplet Metabolism)	Glycerolipid	Triacylglycerol (TG) (L1), Unsaturated Triacylglycerol (U-TG) (L2)	Glycerolipids
Platform 1 (Lipids)	587	TG 62:3	NA	QSEFCNRWIMUGOX-QFXJXGHKSA-N	NA	NA	Lipids	Glyceride Metabolism, Energy Storage (Lipid Droplet Metabolism)	Glycerolipid	Triacylglycerol (TG) (L1), Unsaturated Triacylglycerol (U-TG) (L2)	Glycerolipids
Platform 1 (Lipids)	588	TG 62:4	NA	AHXIACCOHSVLRP-ULZSGHTGSA-N	NA	NA	Lipids	Glyceride Metabolism, Energy Storage (Lipid Droplet Metabolism)	Glycerolipid	Triacylglycerol (TG) (L1), Unsaturated Triacylglycerol (U-TG) (L2)	Glycerolipids
Platform 1 (Lipids)	589	TG 62:5|TG 26:1_18:2_18:2	NA	OEXIKZYHPRWSJP-UHFFFAOYSA-N	NA	NA	Lipids	Glyceride Metabolism, Energy Storage (Lipid Droplet Metabolism)	Glycerolipid	Triacylglycerol (TG) (L1), Unsaturated Triacylglycerol (U-TG) (L2)	Glycerolipids
Platform 1 (Lipids)	590	TG 64:2	1-eicosanoyl-2-docosanoyl-3-(13Z,16Z-docosadienoyl)-sn-glycerol	HCHPRFXSFUKEHG-KHHCSCFXSA-N	9546132	NA	Lipids	Glyceride Metabolism, Energy Storage (Lipid Droplet Metabolism)	Glycerolipid	Triacylglycerol (TG) (L1), Unsaturated Triacylglycerol (U-TG) (L2)	Glycerolipids
Platform 1 (Lipids)	591	TG 64:3	1-eicosanoyl-2-docosanoyl-3-(10Z,13Z,16Z-docosatrienoyl)-sn-glycerol	CRFJHGHXESDEPR-XEDHRWIKSA-N	9546071	NA	Lipids	Glyceride Metabolism, Energy Storage (Lipid Droplet Metabolism)	Glycerolipid	Triacylglycerol (TG) (L1), Unsaturated Triacylglycerol (U-TG) (L2)	Glycerolipids
Platform 1 (Lipids)	592	TG 64:4	NA	IABPCCHORNRSBT-ULZSGHTGSA-N	NA	NA	Lipids	Glyceride Metabolism, Energy Storage (Lipid Droplet Metabolism)	Glycerolipid	Triacylglycerol (TG) (L1), Unsaturated Triacylglycerol (U-TG) (L2)	Glycerolipids
Platform 1 (Lipids)	485	TG 45:4;1O|TG 10:0_18:1_17:3;1O	NA	LAWSRCVMDYXSCX-UHFFFAOYSA-N	NA	NA	Lipids	Glyceride Metabolism, Energy Storage (Lipid Droplet Metabolism)	Glycerolipid	Triacylglycerol (TG) (L1), Unsaturated Triacylglycerol (U-TG) (L2)	Glycerolipids
Platform 1 (Lipids)	486	TG 45:5;1O|TG 10:0_18:2_17:3;1O	NA	DNNSMDCFHPYUJX-UHFFFAOYSA-N	NA	NA	Lipids	Glyceride Metabolism, Energy Storage (Lipid Droplet Metabolism)	Glycerolipid	Triacylglycerol (TG) (L1), Unsaturated Triacylglycerol (U-TG) (L2)	Glycerolipids
Platform 1 (Lipids)	487	TG 46:4;1O|TG 16:0_13:1_17:3;1O	NA	YEMMUEPYJAOAQW-UHFFFAOYSA-N	NA	NA	Lipids	Glyceride Metabolism, Energy Storage (Lipid Droplet Metabolism)	Glycerolipid	Triacylglycerol (TG) (L1), Unsaturated Triacylglycerol (U-TG) (L2)	Glycerolipids
Platform 1 (Lipids)	491	TG 48:5;1O|TG 13:1_18:2_17:2;1O	NA	JJKLSOCSLCBNDV-UHFFFAOYSA-N	NA	NA	Lipids	Glyceride Metabolism, Energy Storage (Lipid Droplet Metabolism)	Glycerolipid	Triacylglycerol (TG) (L1), Unsaturated Triacylglycerol (U-TG) (L2)	Glycerolipids
Platform 1 (Lipids)	492	TG 48:6;1O|TG 13:1_18:2_17:3;1O	NA	ZJXUIBCREUAVJU-UHFFFAOYSA-N	NA	NA	Lipids	Glyceride Metabolism, Energy Storage (Lipid Droplet Metabolism)	Glycerolipid	Triacylglycerol (TG) (L1), Unsaturated Triacylglycerol (U-TG) (L2)	Glycerolipids
Platform 1 (Lipids)	493	TG 48:7;1O|TG 13:1_18:2_17:4;1O	NA	IAIMCCYJZMPABZ-UHFFFAOYSA-N	NA	NA	Lipids	Glyceride Metabolism, Energy Storage (Lipid Droplet Metabolism)	Glycerolipid	Triacylglycerol (TG) (L1), Unsaturated Triacylglycerol (U-TG) (L2)	Glycerolipids
Platform 1 (Lipids)	514	TG 52:4;1O|TG 16:1_18:1_18:2;1O	NA	NCUVHOLDZAPUMH-UHFFFAOYSA-N	NA	NA	Lipids	Glyceride Metabolism, Energy Storage (Lipid Droplet Metabolism)	Glycerolipid	Triacylglycerol (TG) (L1), Unsaturated Triacylglycerol (U-TG) (L2)	Glycerolipids
Platform 1 (Lipids)	515	TG 52:4;2O|TG 18:2_19:2_15:0;2O	NA	IGQGKOISINHLBS-UHFFFAOYSA-N	NA	NA	Lipids	Glyceride Metabolism, Energy Storage (Lipid Droplet Metabolism)	Glycerolipid	Triacylglycerol (TG) (L1), Unsaturated Triacylglycerol (U-TG) (L2)	Glycerolipids
Platform 1 (Lipids)	519	TG 52:5;1O|TG 18:2_18:3_16:0;1O	NA	WPUXVKJIAPLMSO-UHFFFAOYSA-N	NA	NA	Lipids	Glyceride Metabolism, Energy Storage (Lipid Droplet Metabolism)	Glycerolipid	Triacylglycerol (TG) (L1), Unsaturated Triacylglycerol (U-TG) (L2)	Glycerolipids
Platform 1 (Lipids)	520	TG 52:5;2O|TG 18:2_19:3_15:0;2O	NA	FBWAYNIEKNLMTM-UHFFFAOYSA-N	NA	NA	Lipids	Glyceride Metabolism, Energy Storage (Lipid Droplet Metabolism)	Glycerolipid	Triacylglycerol (TG) (L1), Unsaturated Triacylglycerol (U-TG) (L2)	Glycerolipids
Platform 1 (Lipids)	522	TG 52:6;1O|TG 16:0_18:3_18:3;1O	NA	NEARCVKCLXTTGF-UHFFFAOYSA-N	NA	NA	Lipids	Glyceride Metabolism, Energy Storage (Lipid Droplet Metabolism)	Glycerolipid	Triacylglycerol (TG) (L1), Unsaturated Triacylglycerol (U-TG) (L2)	Glycerolipids
Platform 1 (Lipids)	536	TG 54:4;1O|TG 18:0_18:1_18:3;1O	NA	IXPPUZKXNGHXLW-UHFFFAOYSA-N	NA	NA	Lipids	Glyceride Metabolism, Energy Storage (Lipid Droplet Metabolism)	Glycerolipid	Triacylglycerol (TG) (L1), Unsaturated Triacylglycerol (U-TG) (L2)	Glycerolipids
Platform 1 (Lipids)	538	TG 54:5;1O|TG 18:0_18:2_18:3;1O	NA	LWVCLSHSLUMABY-UHFFFAOYSA-N	NA	NA	Lipids	Glyceride Metabolism, Energy Storage (Lipid Droplet Metabolism)	Glycerolipid	Triacylglycerol (TG) (L1), Unsaturated Triacylglycerol (U-TG) (L2)	Glycerolipids
Platform 1 (Lipids)	541	TG 54:6;1O|TG 18:1_18:2_18:3;1O	NA	BIZYBMSSHGFOHB-UHFFFAOYSA-N	NA	NA	Lipids	Glyceride Metabolism, Energy Storage (Lipid Droplet Metabolism)	Glycerolipid	Triacylglycerol (TG) (L1), Unsaturated Triacylglycerol (U-TG) (L2)	Glycerolipids
Platform 1 (Lipids)	542	TG 54:6;1O|TG 18:2_18:2_18:2;1O	NA	PEJGVKGDCQVMJQ-UHFFFAOYSA-N	NA	NA	Lipids	Glyceride Metabolism, Energy Storage (Lipid Droplet Metabolism)	Glycerolipid	Triacylglycerol (TG) (L1), Unsaturated Triacylglycerol (U-TG) (L2)	Glycerolipids
Platform 1 (Lipids)	543	TG 54:6;2O|TG 18:2_18:2_18:2;2O	NA	WJBZGNANTKYZFX-UHFFFAOYSA-N	NA	NA	Lipids	Glyceride Metabolism, Energy Storage (Lipid Droplet Metabolism)	Glycerolipid	Triacylglycerol (TG) (L1), Unsaturated Triacylglycerol (U-TG) (L2)	Glycerolipids
Platform 1 (Lipids)	546	TG 54:7;1O|TG 18:2_18:2_18:3;1O	NA	WPNABYOSCSUAOM-UHFFFAOYSA-N	NA	NA	Lipids	Glyceride Metabolism, Energy Storage (Lipid Droplet Metabolism)	Glycerolipid	Triacylglycerol (TG) (L1), Unsaturated Triacylglycerol (U-TG) (L2)	Glycerolipids
Platform 1 (Lipids)	547	TG 54:7;2O|TG 18:3_18:3_18:1;2O	NA	RWPSDTLGGIRPKJ-UHFFFAOYSA-N	NA	NA	Lipids	Glyceride Metabolism, Energy Storage (Lipid Droplet Metabolism)	Glycerolipid	Triacylglycerol (TG) (L1), Unsaturated Triacylglycerol (U-TG) (L2)	Glycerolipids
Platform 1 (Lipids)	548	TG 54:8;1O|TG 18:2_18:3_18:3;1O	NA	IXIWBHWTKQYZDO-UHFFFAOYSA-N	NA	NA	Lipids	Glyceride Metabolism, Energy Storage (Lipid Droplet Metabolism)	Glycerolipid	Triacylglycerol (TG) (L1), Unsaturated Triacylglycerol (U-TG) (L2)	Glycerolipids
Platform 1 (Lipids)	549	TG 54:8;2O|TG 18:3_18:3_18:2;2O	NA	QPYOYKYFJJIVJH-UHFFFAOYSA-N	NA	NA	Lipids	Glyceride Metabolism, Energy Storage (Lipid Droplet Metabolism)	Glycerolipid	Triacylglycerol (TG) (L1), Unsaturated Triacylglycerol (U-TG) (L2)	Glycerolipids
Platform 1 (Lipids)	551	TG 54:9;1O|TG 18:3_18:3_18:3;1O	NA	XTGILNAGWOVVAM-UHFFFAOYSA-N	NA	NA	Lipids	Glyceride Metabolism, Energy Storage (Lipid Droplet Metabolism)	Glycerolipid	Triacylglycerol (TG) (L1), Unsaturated Triacylglycerol (U-TG) (L2)	Glycerolipids
Platform 1 (Lipids)	559	TG 56:11;2O|TG 18:3_18:3_20:5;2O	NA	XADZKJWJCOMYCJ-UHFFFAOYSA-N	NA	NA	Lipids	Glyceride Metabolism, Energy Storage (Lipid Droplet Metabolism)	Glycerolipid	Triacylglycerol (TG) (L1), Unsaturated Triacylglycerol (U-TG) (L2)	Glycerolipids
Platform 1 (Lipids)	568	TG 57:3|TG 21:0_18:1_18:2	NA	DBBVNPVUCZKTLC-UHFFFAOYSA-N	NA	NA	Lipids	Glyceride Metabolism, Energy Storage (Lipid Droplet Metabolism)	Glycerolipid	Triacylglycerol (TG) (L1), Unsaturated Triacylglycerol (U-TG) (L2)	Glycerolipids
Platform 1 (Lipids)	569	TG 57:4|TG 21:0_18:2_18:2	NA	CTPZQGUDKSDLOA-UHFFFAOYSA-N	NA	NA	Lipids	Glyceride Metabolism, Energy Storage (Lipid Droplet Metabolism)	Glycerolipid	Triacylglycerol (TG) (L1), Unsaturated Triacylglycerol (U-TG) (L2)	Glycerolipids
Platform 1 (Lipids)	578	TG 59:4|TG 23:0_18:2_18:2	NA	ANQPUWJPYXNDFZ-UHFFFAOYSA-N	NA	NA	Lipids	Glyceride Metabolism, Energy Storage (Lipid Droplet Metabolism)	Glycerolipid	Triacylglycerol (TG) (L1), Unsaturated Triacylglycerol (U-TG) (L2)	Glycerolipids
Platform 1 (Lipids)	593	TG 81:10|TG 19:0_30:2_32:8	NA	CAKIJDMSGJEQIK-UHFFFAOYSA-N	NA	NA	Lipids	Glyceride Metabolism, Energy Storage (Lipid Droplet Metabolism)	Glycerolipid	Triacylglycerol (TG) (L1), Unsaturated Triacylglycerol (U-TG) (L2)	Glycerolipids
Platform 3 (Primary Metabolites)	340	citric acid	Citrate	KRKNYBCHXYNGOX-UHFFFAOYSA-N	311	C00158	Carbohydrates	TCA Cycle, Amino Acid Metabolism, Non-aromatic Amino Acid Metabolism, Aromatic Amino Acid Metabolism, Alkaloid Metabolism, Nicotinate and nicotinamide metabolism, Hormone Metabolism, Glyoxylate Metabolism, Cofactor/Coenzyme Metabolism, Carbon Fixation	Organic Acid, Carboxylic Acid	Tricarboxylic Acid
Platform 3 (Primary Metabolites)	358	aconitic acid	cis-Aconitate	GTZCVFVGUGFEME-IWQZZHSRSA-N	643757	C00417	Carbohydrates	TCA Cycle, Glyoxylate Metabolism, Phenylpropanoid Metabolism, Alkaloid Metabolism, Hormone Metabolism, Terpenoid Metabolism, Steroid Metabolism	Organic Acid, Carboxylic Acid	Tricarboxylic Acid
Platform 3 (Primary Metabolites)	234	trisaccharide	D-Galactan	FYGDTMLNYKFZSV-UHFFFAOYSA-N	871	C00420	Carbohydrates	Sugar Metabolism, Sugar (Oligosaccharide) Metabolism	Oligosaccharide	Trisaccharide, Hexose Trisaccharide
Platform 2 (Polyphenols and fatty acids)	63	Gentianose	NA	MUPFEKGTMRGPLJ-WSCXOGSTSA-N	117678	C08239	Carbohydrates	Sugar Metabolism, Sugar (Oligosaccharide) Metabolism	Oligosaccharide	Trisaccharide, Hexose/Pentose Trisaccharide
Platform 3 (Primary Metabolites)	258	raffinose	Melitose	MUPFEKGTMRGPLJ-ZQSKZDJDSA-N	439242	C00492	Carbohydrates	Sugar Metabolism, Sugar (Oligosaccharide) Metabolism	Oligosaccharide	Trisaccharide, Hexose/Pentose Trisaccharide
Platform 3 (Primary Metabolites)	281	melezitose	melicitose	QWIZNVHXZXRPDR-WSCXOGSTSA-N	92817	C08243	Carbohydrates	Sugar Metabolism, Sugar (Oligosaccharide) Metabolism	Oligosaccharide	Trisaccharide, Hexose/Pentose Trisaccharide
Platform 3 (Primary Metabolites)	253	serotonin	5-Hydroxytryptamine	QZAYGJVTTNCVMB-UHFFFAOYSA-N	5202	C00780	Phenolics	Amino Acid Metabolism, Aromatic Amino Acid Metabolism, Tryptophan Metabolism, Alkaloid Metabolism	Simple Phenol, Biogenic Amine, Alkaloid, Amine	True Alkaloid (Amino Acid Derived w/ Nitrogen Heterocycle), Indolamine, Diamine
Platform 3 (Primary Metabolites)	230	UDP-N-acetylglucosamine	UDP-GlcNAc	LFTYTUAZOPRMMI-CFRASDGPSA-N	445675	C00043	Carbohydrates	Amino and Nucleotide Sugar Metabolism	Nucleotide (Activated) Sugar, Amino Sugar	UDP-sugar
Platform 3 (Primary Metabolites)	231	UDP-glucuronic acid	UDP-glucuronate	HDYANYHVCAPMJV-LXQIFKJMSA-N	17473	C00167	Carbohydrates	Amino and Nucleotide Sugar Metabolism, Sugar Metabolism, Ascorbate and Aldarate Metabolism, Cofactor/Coenzyme Metabolism	Nucleotide (Activated) Sugar, Amino Sugar	UDP-sugar
Platform 3 (Primary Metabolites)	275	nicotinic acid	Niacin	PVNIIMVLHYAWGP-UHFFFAOYSA-N	938	C00253	Alkaloids	Alkaloid Metabolism, Amino Acid Metabolism, Aromatic Amino Acid Metabolism, Tryptophan Metabolism, Nicotinate and Nicotinamide metabolism, Vitamin Metabolism, Cofactor Metabolism	Pyridine Alkaloid, Vitamin, B Vitamin, Carboxylic Acid	Vitamin B3, Monocarboxylic Acid, Water-soluble Vitamin, Cofactor
Platform 3 (Primary Metabolites)	261	pyridoxine	Pyridoxol, Pyridoxine, Vitamin B6	LXNHXLLTXMVWPM-UHFFFAOYSA-N	1054	C00314	Alkaloids	Alkaloid Metabolism, Vitamin Metabolism, Vitamin B6 Metabolism, Cofactor Metabolism	Pyridine Alkaloid, Vitamin, B Vitamin	Vitamin B6, Water-soluble Vitamin, Cofactor
Platform 3 (Primary Metabolites)	338	dehydroascorbic acid	Dehydroascorbate	SBJKKFFYIZUCET-JLAZNSOCSA-N	440667	C05422	Carbohydrates	Ascorbate and Aldarate Metabolism, Glutathione Metabolism, Vitamin Metabolism	Organic Acid, Vitamin	Water Soluble Vitamin, Vitamin C
Platform 3 (Primary Metabolites)	351	ascorbic acid	Vitamin C	CIWBSHSKHKDKBQ-JLAZNSOCSA-N	54670067	C00072	Carbohydrates	Ascorbate and Aldarate Metabolism, Glutathione Metabolism, Vitamin Metabolism	Organic Acid, Vitamin	Water Soluble Vitamin, Vitamin C
