# Supplementary material for: Unveiling the “hidden quality” of the walnut pellicle: a precious source of bioactive lipids
Source: Front Plant Sci. 2024 Jun 18;15:1395543. doi: 10.3389/fpls.2024.1395543 (PMC11217525; doi:10.3389/fpls.2024.1395543)
Supplement: Supplementary Table 5 — Concentrations of oxylipins and endocannabinoids detected by targeted analysis in waste byproducts. [file Table_5.xlsx]

## Sheet: Metaboloites Panel Targeted
	Newman Lab Oxylipins (Quantified with Endocannabinoids)
	Common Abbreviaton	Psuedo Quant	Observation Frequency	Parent Lipid	Class	Assay quality	InChIKey	PubChem CID	HMDB ID	KEGG
1	9,10-DiHO		common	C18:1n9	Diol	excellent	VACHUYIREGFMSP-SJORKVTESA-N	441460	---
2	9(10)EpO		common	C18:1n9	Epox	excellent	IMYZYCNQZDBZBQ-UHFFFAOYSA-N	15868	HMDB0061650
3	9,12,13-TriHOME		common	C18:2n6	Triol	excellent	MDIUMSLCYIJBQC-MVFSOIOZSA-N	9858729	HMDB04708	C14833
4	12,13-DiHOME		common	C18:2n6	Diol	excellent	CQSLTKIXAJTQGA-FLIBITNWSA-N	10236635	HMDB04705	C14829
5	9,10-DiHOME		common	C18:2n6	Diol	excellent	XEBKSQSGNGRGDW-YFHOEESVSA-N	9966640	HMDB04704	C14828
6	12(13)-EpOME		common	C18:2n6	Epox	excellent	CCPPLLJZDQAOHD-FLIBITNWSA-N	5356421	HMDB04702
7	9(10)-EpOME		common	C18:2n6	Epox	excellent	FBUKMFOXMZRGRB-YFHOEESVSA-N	6246154	HMDB04701	C14825
8	13-HODE		common	C18:2n6	R-OH	excellent	HNICUWMFWZBIFP-IRQZEAMPSA-N	6443013	HMDB04667	C14762
9	12-HODE		common	C18:2n6	R-OH	excellent	VNRNQMIMEDREKD-GRKONUDFSA-N	---
10	10-HODE		common	C18:2n6	R-OH	excellent	LEQFZPFZNAEQPM-RBDUDSBRSA-N	---
11	9-HODE		common	C18:2n6	R-OH	excellent	NPDSHTNEKLQQIJ-SIGMCMEVSA-N	5282945	HMDB10223
12	13-HpODE	x	common	C18:2n6	R-OOH	excellent	JDSRHVWSAMTSSN-IRQZEAMPSA-N	5280720	HMDB03871	C04717
13	9-HpODE	x	common	C18:2n6	R-OOH	excellent	JGUNZIWGNMQSBM-ZJHFMPGASA-N	6439847	HMDB06940
14	12(13)Ep-9-KODE		common	C18:2n6	Epox,R=O	fair	RCMABBHQYMBYKV-BUHFOSPRSA-N	5283007	HMDB13623
15	9-KODE		common	C18:2n6	R=O	fair	LUZSWWYKKLTDHU-ZJHFMPGASA-N	9839084	HMDB04669	C14766
16	13-KODE		common	C18:2n6	R=O	fair	JHXAZBBVQSRKJR-BSZOFBHHSA-N	6446027	HMDB04668	C14765
17	15,16-DiHODE		common	C18:3n3	Diol	excellent	LKLLJYJTYPVCID-OHPMOLHNSA-N	16061068	HMDB10208
18	12,13-DiHODE		common	C18:3n3	Diol	excellent	RGRKFKRAFZJQMS-OOHFSOINSA-N	16061067	HMDB10201
19	9,10-DiHODE		common	C18:3n3	Diol	excellent	QRHSEDZBZMZPOA-ZJSQCTGTSA-N	16061066	HMDB10221
20	15(16)-EpODE		common	C18:3n3	Epox	excellent	HKSDVVJONLXYKL-OHPMOLHNSA-N	16061062	HMDB10206
21	9(10)-EpODE		common	C18:3n3	Epox	excellent	JTEGNNHWOIJBJZ-ZJSQCTGTSA-N	16061060	HMDB10220
22	12(13)-EpODE		common	C18:3n3	Epox	excellent	BKKGUKSHPCTUGE-OOHFSOINSA-N	16061061	HMDB10200
23	9-HOTE		common	C18:3n3	R-OH	excellent	YUPHIKSLGBATJK-OBKPXJAFSA-N	53480359	HMDB10224
24	13-HOTE		common	C18:3n3	R-OH	excellent	KLLGGGQNRTVBSU-JDTPQGGVSA-N	10469728	HMDB10203
25	Lipoxin B4		rare	C20:4n6	Triol	excellent	UXVRTOKOJOMENI-WLPVFMORSA-N	5280915	HMDB05082
26	Lipoxin A4		rare	C20:4n6	Triol	excellent	IXAQOQZEOGMIQS-SSQFXEBMSA-N	5280914	HMDB04385	C06314
27	LTB4		common	C20:4n6	Diol	excellent	KFGOFTHODYBSGM-ZUNNJUQCSA-N	5280888	HMDB02886	C05961
28	5,15-DiHETE		rare	C20:4n6	Diol	excellent	UXGXCGPWGSUMNI-BVHTXILBSA-N	5283158	HMDB10216
29	8,15-DiHETE		rare	C20:4n6	Diol	excellent	NNPWRKSGORGTIM-RCDCWWQHSA-N	53480358	HMDB10219
30	6-trans-LTB4		rare	C20:4n6	Diol	excellent	VNYSSYRCGWBHLG-UKNWISKWSA-N	5283128	HMDB05087
31	14,15-DiHETrE		common	C20:4n6	Diol	excellent	SYAWGTIVOGUZMM-ILYOTBPNSA-N	5283147	HMDB02265	C14775
32	11,12-DiHETrE		common	C20:4n6	Diol	excellent	LRPPQRCHCPFBPE-KROJNAHFSA-N	5283146	HMDB02314	C14774
33	8,9-DiHETrE		common	C20:4n6	Diol	excellent	DCJBINATHQHPKO-TYAUOURKSA-N	5283144	HMDB02311	C14773
34	5,6-DiHETrE		common	C20:4n6	Diol	excellent	GFNYAPAJUNPMGH-QNEBEIHSSA-N	5283142	HMDB02343	C14772
35	14(15)-EpETrE		common	C20:4n6	Epox	excellent	WLMZMBKVRPUYIG-LTCHCNGXSA-N	11954058	HMDB04693	C14813
36	11(12)-EpETrE		common	C20:4n6	Epox	excellent	DXOYQVHGIODESM-IQCOFVSKSA-N	53480479	HMDB10409
37	8(9)-EpETrE		common	C20:4n6	Epox	excellent	DBWQSCSXHFNTMO-TYAUOURKSA-N	5283203	HMDB02232	C14769
38	20-HETE		rare	C20:4n6	R-OH	excellent	NNDIXBJHNLFJJP-DTLRTWKJSA-N	5283157	HMDB05998	C14748
39	15-HETE		common	C20:4n6	R-OH	excellent	JSFATNQSLKRBCI-VAEKSGALSA-N	5280724	HMDB03876	C04742
40	12-HETE		common	C20:4n6	R-OH	excellent	ZNHVWPKMFKADKW-FYMOKONMSA-N	5312983	HMDB06111
41	11-HETE		common	C20:4n6	R-OH	excellent	GCZRCCHPLVMMJE-RSPKXIRXSA-N	5312981	HMDB04682
42	9-HETE		common	C20:4n6	R-OH	excellent	KATOYYZUTNAWSA-DLJQHUEDSA-N	5312978	HMDB10222
43	8-HETE		common	C20:4n6	R-OH	excellent	NLUNAYAEIJYXRB-VYOQERLCSA-N	5283154	HMDB04679	C14776
44	5-HETE		common	C20:4n6	R-OH	excellent	KGIJOOYOSFUGPC-JGKLHWIESA-N	5280733	HMDB11134	C04805
45	15-KETE		common	C20:4n6	R=O	fair	YGJTUEISKATQSM-USWFWKISSA-N	5280701	HMDB10210	C04577
46	12-KETE		rare	C20:4n6	R=O	fair	GURBRQGDZZKITB-VXBMJZGYSA-N	5283162
47	5-KETE		common	C20:4n6	R=O	fair	MEASLHGILYBXFO-XTDASVJISA-N	5283159	HMDB10217	C14732
48	TXB2		common	C20:4n6	TX	excellent	XNRNNGPBEPRNAR-JQBLCGNGSA-N	5283137	HMDB03252
49	6-keto-PGF1a		common	C20:4n6	PG	excellent	KFGOFTHODYBSGM-ZUNNJUQCSA-N	5280888	HMDB02886	C05961
50	PGF2a		common	C20:4n6	PG	excellent	PXGPLTODNUVGFL-UAAPODJFSA-N	5283078	HMDB01139
51	F2-IsoPs	x	common	C20:4n6	PG	excellent	---	---	---
52	PGE2		common	C20:4n6	PG	excellent	XEYBRNLFEZDVAW-ARSRFYASSA-N	5280360	HMDB01220	C00584
53	15-keto-PGE2		rare	C20:4n6	PG	excellent	YRTJDWROBKPZNV-KMXMBPPJSA-N	5280719	HMDB03175
54	PGD2		common	C20:4n6	PG	excellent	BHMBVRSPMRCCGG-OUTUXVNYSA-N	448457	HMDB01403	C00696
55	15-deoxy PGJ2		common	C20:4n6	PG	excellent	VHRUMKCAEVRUBK-GODQJPCRSA-N	5311211	HMDB05079	C14717
56	RvE1		rare	C20:5n3	Triol	excellent	AOPOCGPBAIARAV-WEKRNNBPSA-N	25063347	HMDB10410
57	LTB5		common	C20:5n3	Diol	excellent	BISQPGCQOHLHQK-HDNPQISLSA-N	5283125	HMDB05073
58	RvE2		rare	C20:5n3	Diol	excellent	KPRHYAOSTOHNQA-NNQKPOSRSA-N	16061125	---
59	17,18-DiHETE		common	C20:5n3	Diol	excellent	XYDVGNAQQFWZEF-JPURVOHMSA-N	16061120	HMDB10211
60	14,15-DiHETE		common	C20:5n3	Diol	excellent	BLWCDFIELVFRJY-QXBXTPPVSA-N	16061119	HMDB10204
61	11,12-DiHETE		common	C20:5n3	Diol	excellent	DNPZYIPMAWRQQE-BVILWSOJSA-N	16061121
62	8,9-DiHETE		common	C20:5n3	Diol	excellent	NXFSSCYFERVGJQ-JJUYGIQRSA-N	16061118
63	5,6-DiHETE		common	C20:5n3	Diol	excellent	VPXVODYVPILPRC-LTKCOYKYSA-N	14429105
64	17(18)-EpETE		common	C20:5n3	Epox	excellent	GPQVVJQEBXAKBJ-JPURVOHMSA-N	16061089	HMDB10212
65	14(15)-EpETE		common	C20:5n3	Epox	excellent	RGZIXZYRGZWDMI-QXBXTPPVSA-N	16061088	HMDB10205
66	11(12)-EpETE		common	C20:5n3	Epox	excellent	QHOKDYBJJBDJGY-BVILWSOJSA-N	16061087	---
67	8(9)-EpETE		rare	C20:5n3	Epox	excellent	YKIOHMXLFWMWKD-JJUYGIQRSA-N	16061086
68	18-HEPE		common	C20:5n3	R-OH	excellent	LRWYBGFSVUBWMO-UXNZXXPISA-N	16061132
69	15-HEPE		common	C20:5n3	R-OH	excellent	UDXLGBLAJBYLSZ-XBCQTNLFSA-N	53480357	HMDB10209
70	12-HEPE		common	C20:5n3	R-OH	excellent	MCRJLMXYVFDXLS-QGQBRVLBSA-N	10041593	HMDB10202
71	9-HEPE		common	C20:5n3	R-OH	excellent	OXOPDAZWPWFJEW-FPRWAWDYSA-N	5283187	HMDB60053
72	5-HEPE		common	C20:5n3	R-OH	excellent	FTAGQROYQYQRHF-FCWZHQICSA-N	6439678	HMDB05081
73	RvD1		very rare	C22:6n3	Triol	excellent	OIWTWACQMDFHJG-NJIQAZPPSA-N	16061135	HMDB03733
74	RvD2		very rare	C22:6n3	Triol	excellent	IKFAUGXNBOBQDM-XFMPMKITSA-N	11383310	---
75	Protectin DX		rare	C22:6n3	Diol	excellent	CRDZYJSQHCXHEG-XLBFCUQGSA-N	11667655	---
76	Maresin 1		very rare	C22:6n3	Diol	excellent	HLHYXXBCQOUTGK-LUSCUACYSA-N	102518309	---
77	19(20)-EpDoPE		common	C22:6n3	Epox	excellent	OSXOPUBJJDUAOJ-MBYQGORISA-N	11631565	HMDB13620
78	16(17)-EpDoPE		common	C22:6n3	Epox	excellent	BCTXZWCPBLWCRV-ZYADFMMDSA-N	14392758	HMDB13621
79	13(14)-EpDoPE		common	C22:6n3	Epox	excellent	DCFKVKFLEPMEGT-UQZHZJRSSA-N	11674605
80	10(11)-EpDoPE		common	C22:6n3	Epox	excellent	YYZNJWZRJUGQCW-UQZHZJRSSA-N	11638767
81	7(8)-EpDoPE		common	C22:6n3	Epox	excellent	OHYKIJBTVXMLKX-MPQBXPHNSA-N	---
82	19,20-DiHDoPE		common	C22:6n3	Diol	excellent	FFXKPSNQCPNORO-MBYQGORISA-N	16061148	HMDB10214
83	16,17-DiHDoPE		common	C22:6n3	Diol	excellent	YXQCSWUATWXVGK-ZYADFMMDSA-N	---
84	13,14-DiHDoPE		common	C22:6n3	Diol	excellent	LINXWSBRRJSWHL-UQZHZJRSSA-N	---
85	10,11-DiHDoPE		common	C22:6n3	Diol	excellent	OAZUCYZBXHOCES-UQZHZJRSSA-N	---
86	7,8-DiHDoPE		common	C22:6n3	Diol	excellent	DPZIOENSPXELQY-MPQBXPHNSA-N	---
87	17-HDoHE		common	C22:6n3	R-OH	excellent	SWTYBBUBEPPYCX-VIIQGJSXSA-N	6439179	HMDB10213
88	14-HDoHE		common	C22:6n3	R-OH	excellent	ZNEBXONKCYFJAF-BGKMTWLOSA-N	11566378	HMDB60044
89	7-HDoHE		common	C22:6n3	R-OH	excellent	OZXAIGIRPOOJTI-XJAVJPOHSA-N	16061142
90	4-HDoHE		common	C22:6n3	R-OH	excellent	IFRKCNPQVIJFAQ-JGDWKEERSA-N	53394255	HMDB60049
91	17-KDoHE		very rare	C22:6n3	R=O	fair	QCEBQMMZCFADMF-VIIQGJSXSA-N	---
92	4-KDoHE		very rare	C22:6n3	R=O	fair	UHNUULCIKILOHW-PQVBWYSWSA-N	---
93	LA	x			PUFA		OYHQOLUKZRVURQ-HZJYTTRNSA-N	5280450	HMDB00673
94	ALA	x			PUFA		DTOSIQBPPRVQHS-PDBXOOCHSA-N	5280934	HMDB01388
95	AA	x			HUFA		YZXBAPSDXZZRGB-DOFZRALJSA-N	444899	HMDB01043
96	EPA	x			HUFA		JAZBEHYOTPTENJ-JLNKQSITSA-N	446284	HMDB01999
97	DHA	x			HUFA		MBMBGCFOFBJSGT-KUBAVDMBSA-N	445580	HMDB02183

## Sheet: Concentrations
						Sorting Room Meal			Blower Fluff
Original Order	Chemical Class	Source	Parent FA	Units	JWN-ID	wal_1	wal_2	wal_3	wal_4	wal_5	wal_6
1	PG	COX	C20:4n6	µM	6-keto-PGF1a	0.000632	0.000635	0.00071	0.000545	0.00119	0.000961
2	PG	COX	C20:4n6	µM	F2IsoP	0.178	0.118	0.156	0.136	0.334	0.75
3	PG	COX	C20:4n6	µM	15-keto-PGE2	0.00462	0.00306	0.00587	0.00203	0.0022	0.00295
4	Triol	Autoox	C18:2n6	µM	9,12,13-TriHOME	72	59.6	71.5	48.7	83.2	82.5
5	Triol	LOX	C20:5n3	µM	RvD1	0.00508	0.00535	0.00602	0.00961	0.0136	0.0158
6	R-OH	LOX	C18:2n6	µM	13-HODE	74.8	74.2	78.5	70.2	93.4	87.8
7	R-OH	LOX	C18:2n6	µM	9-HODE	45.5	45.3	45.8	37.9	50.2	54
8	R-OH	Singlet Oxygen	C18:2n6	µM	12-HODE	15.6	9.92	12.8	27.2	44.6	41.8
9	R-OH	Singlet Oxygen	C18:2n6	µM	10-HODE	8.88	6.95	7.27	23.9	28.9	38
10	R-OOH	LOX	C18:2n6	Rel_Ab	9-HpODE_(screen)	15.9171	23.2403	21.0667	12.4227	12.9744	14.3789
11	R-OH	LOX	C18:3n3	µM	9-HOTE	33.4	28.7	33.3	26	38.9	30.7
12	R-OH	LOX	C18:3n3	µM	13-HOTE	34.1	28.3	34.3	24.1	36.3	27.7
13	R-OH	LOX	C20:4n6	µM	15-HETE	0.00351	0.00192	0.00424	0.00273	0.00424	0.00474
14	R-OH	COX	C20:4n6	µM	11-HETE	0.000716	0.000846	0.00143	0.00094	0.00231	0.00146
15	R-OH	LOX	C20:4n6	µM	12-HETE	0.000543	0.000479	0.000922	0.000596	0.00132	0.000931
16	R-OH	LOX	C20:4n6	µM	8-HETE	0.00033	0.000637	0.000908	0.000715	0.00201	0.000665
17	R-OH	Autoox	C20:4n6	µM	9-HETE	0.000627	0.000454	0.000947	0.000499	0.00234	0.000928
18	R-OH	LOX	C20:4n6	µM	5-HETE	0.0015	0.00204	0.00141	0.00153	0.00287	0.00172
19	R-OH	LOX	C20:5n3	µM	18-HEPE	0.000724	0.000422	0.000446	0.00132	0.00323	0.00198
20	R-OH	LOX	C20:5n3	µM	12-HEPE	0.000645	0.000278	0.00036	0.000777	0.00171	0.0011
21	R-OH	LOX	C20:5n3	µM	9-HEPE	0.000275	0.000243	0.000757	0.000906	0.00154	0.00115
22	R-OH	LOX	C20:5n3	µM	5-HEPE	0.000506	0.000887	0.000473	0.00111	0.00193	0.00113
23	R=O	ADH	C18:2n6	µM	12(13)-Ep-9-KODE	1.36	0.989	0.748	0.531	0.497	0.789
24	R=O	ADH	C18:2n6	µM	13-KODE	33.9	40.6	28.7	26.2	26.6	40.3
25	R=O	ADH	C18:2n6	µM	9-KODE	64.8	44.1	44.5	45.3	51.5	57.4
26	R=O	ADH	C20:4n6	µM	15-KETE	1.85e-05	0.000935	0	0.000309	7.2e-05	0.000734
27	R=O	ADH	C20:4n6	µM	5-KETE	0.000513	0.000254	0.000556	0.000368	0.000607	0.00169
28	R=O	ADH	C22:6n3	µM	4-KDoHE	0.107	0.184	0.0823	0.0593	0.11	0.178
29	Epox	CYP	C18:1n9	µM	9(10)-EpO	11.5	17.8	10.7	12.2	17.3	15.6
30	Epox	CYP	C18:2n6	µM	12(13)-EpOME	23.2	31.2	22.2	23.1	31.2	26
31	Epox	CYP	C18:2n6	µM	9(10)-EpOME	26.2	38.2	26	26.1	35.2	27.3
32	Epox	CYP	C18:3n3	Rel_Ab	15(16)-EpODE_(screen)	14.6535	11.4851	15.8416	17.1617	16.4356	24.4224
33	Epox	CYP	C18:3n3	Rel_Ab	9(10)-EpODE_(screen)	13.9273	14.7977	14.9002	17.1019	21.1982	18.0748
34	Epox	CYP	C18:3n3	Rel_Ab	12(13)-EpODE_(screen)	13.5779	18.758	14.0927	16.9241	21.7181	14.9292
35	Epox	CYP	C20:4n6	µM	14(15)-EpETrE	0.00113	0.00284	0.00138	0.00219	0.00387	0.00173
36	Epox	CYP	C20:4n6	µM	11(12)-EpETrE	0.000306	0.0022	0.000504	0.000683	0.00191	0.000652
37	Epox	CYP	C20:5n3	µM	17(18)-EpETE	0.00236	0.00494	0.0015	0.029	0.0459	0.0373
38	Epox	CYP	C20:5n3	µM	14(15)-EpETE	0.000558	0.00127	0.000317	0.00135	0.00267	0.00109
39	Epox	CYP	C20:5n3	µM	11(12)-EpETE	0.000444	0.00098	0.000528	0.000924	0.00113	0.000486
40	Epox	CYP	C20:5n3	µM	8(9)-EpETE	0.00142	0.00128	0.00097	0.000774	0.00188	0.000879
41	Epox	CYP	C22:6n3	µM	19(20)-EpDoPE	0.00293	0.00426	0.00311	0.0021	0.00481	0.000375
42	Epox	CYP	C22:6n3	µM	16(17)-EpDoPE	0.000105	0.00152	0.000662	0.000234	0.00115	1.36e-06
43	Epox	CYP	C22:6n3	µM	13(14)-EpDoPE	0.00159	0.00227	0.00119	0.000385	0.00178	0.000358
44	Epox	CYP	C22:6n3	µM	10(11)-EpDoPE	0.000347	0.00212	0.000626	0.000289	0.00083	6.97e-05
45	Epox	CYP	C22:6n3	µM	7(8)-EpDoPE	0.00398	0.00971	0.00649	0.00481	0.00771	0.0033
46	vic-Diol	sEH	C18:1n9	µM	9,10-DiHO	0.946	0.431	0.714	2.53	4.7	8.04
47	vic-Diol	sEH	C18:2n6	µM	12,13-DiHOME	1.63	1.24	1.39	2.87	4.81	5.04
48	vic-Diol	sEH	C18:2n6	µM	9,10-DiHOME	0.665	0.557	0.614	4.31	7.68	5.36
49	vic-Diol	sEH	C18:3n3	Rel_Ab	15,16-DiHODE_(screen)	5.75049	5.89669	5.94542	24.7563	26.0234	31.6277
50	vic-Diol	sEH	C18:3n3	Rel_Ab	12,13-DiHODE_(screen)	8.96797	8.54093	7.82918	22.6335	23.9146	28.1139
51	vic-Diol	sEH	C18:3n3	Rel_Ab	9,10-DiHODE_(screen)	5.58603	5.97575	5.29734	23.8164	26.9919	32.3326
52	vic-Diol	sEH	C20:4n6	µM	14,15-DiHETrE	0.000107	3.18e-05	0.000271	0.000194	0.000359	0.000233
53	vic-Diol	sEH	C20:4n6	µM	11,12-DiHETrE	0.000993	0.000608	0.00129	0.00046	0.000932	0.000772
54	vic-Diol	sEH	C20:4n6	µM	8,9-DiHETrE	0.000156	0	0.000268	3.83e-05	7.98e-05	0.000265
55	vic-Diol	sEH	C20:4n6	µM	5,6-DiHETrE	0.000168	7.51e-05	0.000242	0.000339	0.000692	0.000476
56	vic-Diol	sEH	C20:5n3	µM	17,18-DiHETE	0.000179	2.55e-05	0.000416	0.00684	0.0114	0.00801
57	vic-Diol	sEH	C20:5n3	µM	14,15-DiHETE	0.00023	0.000251	0.000413	0.00124	0.00227	0.00211
58	vic-Diol	sEH	C20:5n3	µM	11,12-DiHETE	0.000236	0.000218	0.000379	0.00102	0.00114	0.00156
59	vic-Diol	sEH	C20:5n3	µM	8,9-DiHETE	6.58e-05	5.61e-05	2.71e-05	0.000126	0.000482	0.000183
60	vic-Diol	sEH	C20:5n3	µM	5,6-DiHETE	0.000328	0.000129	0.000212	0.000992	0.00183	0.00102
61	vic-Diol	sEH	C22:6n3	µM	13,14-DiHDoPE	0.000254	0.000114	0.000237	0.000107	0.000385	0.000135
62	vic-Diol	sEH	C22:6n3	µM	7,8-DiHDoPE	0.000177	0.000111	0	0	0.000339	0.000316
63	PUFA		Diet	Rel_Ab	18:2n6_(screen)	16.3529	10.2353	18.4118	15.0588	16.2941	23.6471
64	PUFA		Diet	Rel_Ab	C18:3n3_(screen)	16.2722	10.7495	17.4556	16.4694	15.9763	23.0769
65	PUFA		C18:2n6	Rel_Ab	C20:4n6_(screen)	13.0949	8.30624	22.6722	19.864	20.2779	15.7848
66	PUFA		C18:n3n	Rel_Ab	C20:5n3_(screen)	7.9342	9.38558	15.1669	25.1572	20.9966	21.3595
67	PUFA		C20:5n3	Rel_Ab	C22:6n3_(screen)	14.7353	15.7941	28.4706	15.0588	19.0882	6.85294
68	Acyl-EA		C16:0	µM	N-C16:0_EA	0.619	0.648	0.657	0.508	1.04	0.69
69	Acyl-EA	PLD	C18:0	µM	N-C18:0_EA	0.573	0.268	0.498	0.377	0.723	0.584
70	Acyl-EA	PLD	C16:1n7	µM	N-16:1n7_EA	0.0131	0.022	0.0121	0.00943	0.0224	0.0129
71	Acyl-AA	FAAH	C18:1n9	µM	N-C18:1n9_EA	1.19	1.08	1.12	0.866	1.72	1.23
72	Acyl-EA	PLD	18:2n6	µM	N-C18:2n6_EA	5.44	7.45	4.74	3.47	8.38	4.73
73	Acyl-EA	PLD	C20:4n6	µM	N-C20:4n6_EA	0.000306	0.00108	0.000899	0.000334	0.00119	0.000595
74	Acyl-AA	FAAH	C22:4n6	µM	N-C22:4n6_EA	8.39e-05	0.000485	0.000215	4.41e-05	0.000717	0.000412
75	Acyl-EA	PLD	C18:3n3	µM	N-C18:3n3_EA	1.1	1.15	1.01	0.597	1.12	0.676
76	Acyl-EA	PLD	C20:5n3	µM	N-C20:5n3_EA	0.000259	0.000361	0	0.00091	0.00185	0.00157
77	Acyl-AA	FAAH	C18:1n9	µM	N-C18:1n9_Gly	0.00398	0.00353	0.00395	0.031	0.0247	0.053
78	Acyl-AA	FAAH	C18:2n6	µM	N-C18:2n6_Gly	0.00777	0.00991	0.00479	0.0615	0.0628	0.146
79	Acyl-AA	FAAH	C20:4n6	µM	N-C20:4n6_Ser	0.00082	0.000952	0.000831	0.000746	0.00306	0.0006

## Sheet: Functional Group Counts
Functional Group Counts of Bioactive Lipids Targeted Panel
Functional Group	Alt Name	Class	Count	Percentage of Total
Acyl-AA	Acyl-Amino Acids	Amides	5	0.0632911
Acyl-EA	Acyl-ethanolamines/amides	Amides	7	0.0886076
Epox	Epoxides	Oxylipins	17	0.21519
PG	Prostaglandins	Hormones	3	0.0379747
PUFA	Polyunsaturated Fatty Acids	Unsaturated Fatty Acids	5	0.0632911
R=O	Keto Fatty Acids	Oxylipins	6	0.0759494
R-OH	Monohydroxy Fatty Acids	Oxylipins	16	0.202532
R-OOH	Hydroperoxy Fatty Acids	Oxylipins	1	0.0126582
Triol	Tri-hydroxy Fatty Acids	Oxylipins	2	0.0253165
vic-Diol	Di-hydroxy Fatty Acids	Oxylipins	17	0.21519
		Total	79	NA
