# Supplementary material for: Unveiling the “hidden quality” of the walnut pellicle: a precious source of bioactive lipids
Source: Front Plant Sci. 2024 Jun 18;15:1395543. doi: 10.3389/fpls.2024.1395543 (PMC11217525; doi:10.3389/fpls.2024.1395543)
Supplement: Supplementary Table 6 — Targeted analysis’s additional information. [file Table_6.xlsx]

## Sheet: Data Quality Documentation
	Data Quality Statement
	Analytical performance was deemed generally acceptable based on estimated surrogate recoveries and replicate precision. Out of a 130 analyte panel, 45% were present in the samples and fulfilled all QC requirements, whereas 30% of the analytes were not detected. 9-HODE and 13-KODE were above the highest calibration standard and results were estimated by linear extrapolation of the calibration curv…
	Table 1: Estimated surrogate recoveries					Table 2: Data quality status of measured metabolites (Note: Screens indicate pseudo-quantitative results)
	Surrogate	Average Recoveries					Pass All QC		Background> 33% in 50-85% of samples		Observed above highest calibration		Non-Detects		Analytical Failure			Analytical replicate precision. Three samples were processed in duplicate. High abundance compounds generally showed high precision with ~60% of residues >100 pmol/g tissue having <35% RSD.
	d4-6-Keto PGF1a	34.9 ± 14%				1	9,12,13-TriHOME	1	6-keto-PGF1a	1	9-HODE	1	RvE1	1	PGE2	Alkaline unstable
	d4-TXB2	36.8 ± 12%				2	F2IsoP	2	8,9-DiHETE	2	13-KODE	2	TXB2	2	PGD2	Alkaline unstable
	d4-PGF2a	12 ± 3.8%				3	15-keto-PGE2	3	14,15-DiHETrE			3	PGF2a	3	PGE2_EA	Alkaline unstable
	d5-LXA4	55.4 ± 21%				4	RvD1	4	13,14-DiHDoPE			4	LXB4	4	PGD2_EA	Alkaline unstable
	d4-LTB4	57.5 ± 7.9%				5	15,16-DiHODE_(screen)	5	8,9-DiHETrE			5	RvD2	5	Acetaminophen	Alkaline unstable
	d11-14,15-DiHETrE	63.8 ± 11%				6	12,13-DiHODE_(screen)	6	7,8-DiHDoPE			6	Naproxen	6	1-AG	Alkaline unstable
	d6-20-HETE	48 ± 9.5%				7	9,10-DiHODE_(screen)	7	5,6-DiHETrE			7	LXA4	7	2-AG	Alkaline unstable
	d4-9(S)-HODE	15 ± 2.6%				8	17,18-DiHETE	8	15-KETE			8	RvE2	8	2-LG	Alkaline unstable
	d3-13-KODE	22.8 ± 4.9%				9	14,15-DiHETE	9	11(12)-EpETE			9	LTB5	9	1-LG	Alkaline unstable
	d8-12-HETE	33.2 ± 5.1%				10	11,12-DiHETE	10	12-HETE			10	8,15-DiHETE	10	2-OG	Alkaline unstable
	d8-5(S)-HETE	39.8 ± 7.7%				11	12,13-DiHOME	11	8-HETE			11	Protectin DX	11	1-OG	Alkaline unstable
	d4-12(13)-EpOME	26.9 ± 4.7%				12	9,10-DiHOME	12	9-HETE			12	5,15-DiHETE	12	13-HpODE_(screen)	Retention time shift
	d8-C20:4n6	26.2 ± 8.7%				13	5,6-DiHETE	13	5-KETE			13	Maresin_1
	d4-PGF2a_EA	124 ± 48%				14	11,12-DiHETrE	14	N-C20:5n3_EA			14	6-trans-LTB4
	d8-C20:4n6_EA	21.6 ± 7.1%				15	12(13)-Ep-9-KODE	15	N-C20:4n6_Ser			15	LTB4
	d8-C20:4n6_Gly	23.9 ± 5.9%				16	9-HOTE	16	N-C20:4n6_EA			16	Ibuprofen
	d4-C16:0_EA	16 ± 5.8%				17	13-HOTE	17	N-C18:2n6_Gly			17	19,20-DiHDoPE
						18	18-HEPE	18	N-C22:4n6_EA			18	16,17-DiHDoPE
						19	9,10-DiHO	19	N-C18:1n9_Gly			19	10,11-DiHDoPE
						20	12-HEPE					20	15-deoxy_PGJ2
						21	9-HEPE					21	15-HEPE
						22	12-HODE					22	20-HETE
						23	10-HODE					23	17-HDoHE
						24	13-HODE					24	14-HDoHE
						25	5-HEPE					25	12-KETE
						26	9-HpODE_(screen)					26	7-HDoHE
						27	17(18)-EpETE					27	4-HDoHE
						28	15(16)-EpODE_(screen)					28	8(9)-EpETrE
						29	9(10)-EpODE_(screen)					29	17-KDoHE
						30	15-HETE					30	PGF2a_EA
						31	12(13)-EpODE_(screen)					31	19(20)-EpDoPE_EA
						32	14(15)-EpETE					32	11(12)-EpETrE_EA
						33	9-KODE					33	N-C22:6n3_EA
						34	11-HETE					34	N-C22:6n3_Gly
						35	8(9)-EpETE					35	N-C20:4n6_Gly
						36	19(20)-EpDoPE					36	N-C20:3n6_EA
						37	5-HETE					37	N-C16:0_Gly
						38	12(13)-EpOME					38	N-C20:0_EA
						39	14(15)-EpETrE					39	N-C24:1n9_EA
						40	9(10)-EpOME
						41	16(17)-EpDoPE
						42	13(14)-EpDoPE
						43	10(11)-EpDoPE
						44	11(12)-EpETrE
						45	7(8)-EpDoPE
						46	4-KDoHE
						47	9(10)-EpO
						48	C20:5n3_(screen)
						49	C18:3n3_(screen)
						50	C22:6n3_(screen)
						51	C20:4n6_(screen)
						52	18:2n6_(screen)
						53	N-C18:3n3_EA
						54	N-16:1n7_EA
						55	N-C18:2n6_EA
						56	N-C16:0_EA
						57	N-C18:1n9_EA
						58	N-C18:0_EA

## Sheet: Acquisition Parameters
						Table S1: Negative Mode Scheduled Multi Reaction Monitoring Experiment a									Table S2: Positive Mode Scheduled Multi Reaction Monitoring Experiment a											Table S3: API Scource Parameter Table
						Compound	Acq Mid Point (min)	Q1 (Da)	Q3 (Da)	Window (sec)	Dwell Wt	DCP	CE		Compound		Acq Mid Point (min)	Q1 (Da)	Q3 (Da)	Window (sec)	Dwell Wt	DCP	CE			Parameter	(-)ESI Exp	(+)ESI Exp
						PUHA_(-)	1.84	249.2	130.1	12	0.5	-30	-18		d4-Acetaminophen		0.79	156.1	114.1	12	0.5	55	21			CUR:	20	20
						RvE1	2.16	349.2	195.2	12	5	-50	-22		Acetaminophen		0.8	152.1	110.1	12	1	55	21			IS:	-4500	4500
						d4-6-Keto PGF1a	2.18	373.3	199.2	12	0.5	-70	-20		PUHA_(+)		1.74	251.2	114.1	12	0.5	65	21			TEM:	650	650
						6-keto-PGF1a	2.18	369.3	163.1	12	2	-70	-33		d4-PGF2a_EA		2.18	384.3	62.1	12	0.5	50	42			GS1:	60	60
						d4-TXB2	2.895	373.3	173.1	32	1	-50	-45		PGF2a_EA		2.19	380.3	62.1	12	2	45	39			GS2:	50	50
						TXB2	2.9	369.3	169.1	32	2	-50	-21		PGE2_EA + PGD2_EA		2.2	378.3	62.1	18	2	65	40			CAD:	Medium	Medium
						9,12,13-TriHOME	2.99	329.2	211.2	15	1	-60	-30		CUDA_(+)		5.74167	341.3	216.2	13	0.5	50	24			EP	-10	10
						d4-PGF2a	3.03	357.2	197.2	12	0.5	-70	-33		19(20)-EpDoPE_EA		7.62167	388.3	370.3	13	3	40	8.5			CXP	-13	12
						PGF2a	3.05	353.2	193.2	30	3	-70	-33		11(12)-EpETrE_EA		8.30167	364.3	62.1	13	3	75	45
						PGE2 + PGD2	3.22	351.202	271.2	18	3	-40	-22		N-C18:3n3_EA		9.88167	322.2	62.1	13	1	60	21
						LXB4	3.27	351.2	221.2	12	3	-55	-22		N-C20:5n3_EA		10.0017	346.2	62.1	13	1	70	39
						d4-PGD2	3.23	355.2	275.2	12	0.5	-40	-27		N-16:1n7_EA		10.6217	298.2	62.1	13	1	105	21
						RvD2	3.3	375.3	277.2	12	3	-50	-18		N-C20:4n6_Ser		11.4917	392.3	106.1	13	1	70	18
						15-keto-PGE2	3.3	349.2	331.3	12	2	-50	-15		N-C22:6n3_EA		11.6217	372.3	62.1	13	1	55	45
						d3-Naproxen	3.4	232.1	188.1	12	0.5	-35	-9		d8-C20:4n6_EA		11.7117	356.3	63.1	13	0.5	50	45
						Naproxen	3.43	229.1	185.1	12	1	-35	-12		N-C18:2n6_EA		11.7617	324.2	62.1	13	1	70	21
						RvD1	3.71	375.3	215.1	12	2	-40	-26		N-C20:4n6_EA		11.8017	348.2	62.1	13	1	70	39
						d5-LXA4	3.74	356.5	222.1	12	0.5	-40	-20		N-C22:6n3_Gly		12.0017	386.3	311.2	13	1	50	15
						LXA4	3.77	351.2	217.2	12	3	-45	-27		d8-C20:4n6_Gly		12.0817	370.3	76.1	13	0.5	45	21
						RvE2	4.22	333.2	253.2	12	2	-60	-20		N-C20:4n6_Gly		12.1817	362.3	76.1	13	1	65	21
						LTB5	4.68	333.2	195.2	12	2	-50	-21		N-C18:2n6_Gly		12.1817	338.3	76.1	13	1	90	17
						15,16-DiHODE	5.1	311.2	235.2	12	1	-55	-27		N-C20:3n6_EA		12.73	350.2	62.1	12	2	35	36
						12,13-DiHODE	5.15	311.2	183.2	12	1	-60	-27		d5-2-AG		12.7958	384.3	287.2	18.5	0.5	60	21
						9,10-DiHODE	5.18	311.2	201.2	12	1	-65	-27		d4-C16:0_EA		12.8	304.2	62.1	12	0.5	90	18
						8,15-DiHETE	5.2	335.2	235.2	12	2	-65	-21		N-C16:0_EA		12.82	300.2	62.1	12	1	70	18
						Protectin DX	5.41	359.2	153.1	12	2	-40	-22		1-_&_2-AG		12.8458	379.302	287.2	18.5	2	95	21
						17,18-DiHETE	5.45	335.2	247.2	12	2	-70	-24		1-_&_2-LG		12.9458	355.202	263.2	18.5	0.5	40	12
						5,15-DiHETE	5.49	335.2	173.1	12	2	-40	-18		N-C16:0_Gly		13.2017	314.2	76.1	13	1	50	15
						Maresin_1	5.56	359.2	250.2	12	2	-55	-20		N-C18:1n9_EA		13.32	326.2	62.1	12	1	105	21
						6-trans-LTB4	5.59	335.201	195.2	12	1	-85	-21		N-C22:4n6_EA		13.42	376.3	62.1	12	2	105	45
						14,15-DiHETE	5.73	335.2	207.2	12	2	-50	-22		N-C18:1n9_Gly		13.6717	340.2	76.2	13	1	60	21
						d4-LTB4	5.82	339.2	197.2	12	1	-50	-24		1-_&_2-OG		14.0458	357.202	265.2	18.5	0.5	55	15
						LTB4	5.84	335.202	195.2	12	1	-50	-24		N-C18:0_EA		14.35	328.2	62.1	12	1	100	21
						CUDA_(-)	5.85	339.4	214.2	12	0.5	-70	-30		N-C20:0_EA		14.98	356.2	339.2	12	5	180	25
						11,12-DiHETE	5.9	335.2	167.1	12	2	-40	-22		N-C24:1n9_EA		15.44	410.3	62.1	12	5	180	41
						d3-Ibuprofen	5.95	208.2	164.1	13	0.5	-50	-9		a - A medium collision gas pressure setting and default enterance and exit potentials were fixed and used for all analytes.
						Ibuprofen	5.97	205.1	161.1	13	1	-50	-9
						12,13-DiHOME	6.07	313.2	183.2	12	1	-70	-30
						8,9-DiHETE	6.2	335.2	185.1	12	2	-30	-22
						9,10-DiHOME	6.41	313.3	201.2	12	1	-65	-27
						d11-14,15-DiHETrE	6.56	348.4	207.2	12	0.5	-65	-24
						14,15-DiHETrE	6.64	337.2	207.2	12	2	-60	-24
						19,20-DiHDoPE	6.65	361.3	273.2	12	2	-80	-24
						5,6-DiHETE	6.77	335.2	145.1	12	2	-30	-22
						16,17-DiHDoPE	6.95	361.3	233.2	12	3	-70	-22
						11,12-DiHETrE	7.11	337.3	167.1	12	2	-55	-27
						13,14-DiHDoPE	7.12	361.3	193.1	12	3	-80	-23.5
						12(13)-Ep-9-KODE	7.285	309.2	291.2	12	1	-90	-21
						9-HOTE	7.34	293.2	171.1	12	1	-60	-21
						10,11-DiHDoPE	7.38	361.3	153.1	12	2	-55	-24
						13-HOTE	7.45	293.2	195.2	12	1	-70	-24
						18-HEPE	7.45	317.201	259.2	12.5	2	-55	-17
						8,9-DiHETrE	7.57	337.2	127.1	12.5	3	-65	-27
						15-deoxy_PGJ2	7.61	315.2	271.2	12	3	-50	-21
						9,10-DiHO	7.74	315.2	297.2	12	1	-110	-30
						15-HEPE	7.82	317.2	219.2	12	1	-55	-18
						d6-20-HETE	7.83	325.3	281.2	12	0.5	-80	-21
						20-HETE	7.87	319.2	275.2	12	3	-95	-24
						7,8-DiHDoPE	7.90971	361.3	189.1	13	2	-70	-23
						12-HEPE	8.12	317.2	179.1	13	1	-45	-18
						5,6-DiHETrE	8.22	337.2	145.1	13	1	-55	-24
						9-HEPE	8.29	317.201	167.2	13	2	-45	-18
						12-HODE + 10-HODE	8.55	295.201	183.1	18.5	1	-160	-26
						13-HODE	8.56	295.201	195.2	15	1	-90	-24
						5-HEPE	8.62	317.2	115.1	13	2	-40	-21
						d4-9(S)-HODE	8.65	299.2	172.1	13	0.5	-85	-27
						9-HODE	8.7	295.201	171.1	13	1	-70	-24
						13-HpODE + 9-HpODE	8.94	311.2	293.2	18.5	1	-55	-15
						17(18)-EpETE	8.81	317.2	259.2	13	3	-55	-15
						d3-13-KODE	8.83	296.2	114.1	13	0.5	-120	-27.5
						15(16)-EpODE + 9(10)-EpODE	8.84	293.201	275.2	25	1	-65	-18
						13-KODE	8.87	293.2	179.1	13	1	-80	-27
						15-HETE	8.89	319.201	219.2	13	1	-55	-18
						17-HDoHE	9.01	343.201	281.2	13	2	-55	-18
						12(13)-EpODE	9.02	293.2	183.2	13	1	-50	-24
						15-KETE	9.13	317.2	273.2	12	2	-60	-18
						14(15)-EpETE	9.21	317.2	207.2	13	3	-45	-18
						9-KODE	9.24	293.2	185.2	13	1	-100	-27
						11-HETE	9.26	319.201	167.1	13	1	-45	-21
						14-HDoHE	9.27	343.202	281.2	13	2	-60	-18
						11(12)-EpETE	9.4	317.202	167.2	16	3	-40	-18
						d8-12-HETE	9.36	327.2	184.2	13	0.5	-60	-21
						12-HETE	9.44853	319.2	179.1	12	1	-60	-21
						8(9)-EpETE	9.48	317.2	155.1	12	3	-40	-16
						8-HETE	9.58538	319.201	155.1	12	1	-45	-21
						12-KETE	9.67	317.201	273.2	11	2	-30	-25
						7-HDoHE	9.69	343.2	281.2	12	2	-80	-17
						9-HETE	9.75	319.202	167.1	13	1	-60	-18
						d8-5(S)-HETE	10.01	327.2	116.1	13	0.5	-70	-18
						19(20)-EpDoPE	10.1	343.303	281.2	13	3	-60	-18
						5-HETE	10.11	319.2	115.1	13	1	-50	-18
						d4-12(13)-EpOME	10.11	299.2	198.1	13	0.5	-90	-24
						12(13)-EpOME	10.18	295.202	195.2	13	1	-85	-21
						14(15)-EpETrE	10.35	319.202	219.2	13	2	-50	-18
						9(10)-EpOME	10.44	295.202	171.1	13	1	-75	-21
						4-HDoHE	10.6	343.204	110.1	18	5	-60	-20
						16(17)-EpDoPE	10.55	343.2	274.15	13	3	-45	-15
						13(14)-EpDoPE	10.67	343.2	234.1	13	3	-55	-15
						10(11)-EpDoPE	10.82	343.2	153.1	13	3	-60	-16
						5-KETE	10.87	317.2	203.2	13	2	-75	-27
						11(12)-EpETrE	10.93	319.203	167.1	13	2	-40	-21
						7(8)-EpDoPE	11.11	343.2	189.1	13	3	-40	-15
						8(9)-EpETrE	11.15	319.202	155.1	13	3	-40	-18
						17-KDoHE	11.32	341.201	297.2	13	3	-50	-17
						4-KDoHE	11.73	341.202	297.2	13	3	-40	-17
						9(10)-EpO	12.1	297.2	279.2	13	1	-105	-27
						C20:5n3	12.88	301.2	257.15	12	1	-60	-15
						C18:3n3	13	277.2	259.15	12	1	-115	-24
						C22:6n3	13.65	327.2	283.15	12	1	-45	-15
						d8-C20:4n6	13.83	311.2	267.15	12	0.5	-60	-18
						C20:4n6	13.88	303.2	259.15	12	1	-40	-18
						18:2n6	14.02	279.2	261.15	12	1	-185	-38
						a - A medium collision gas pressure setting and default enterance and exit potentials were fixed and used for all analytes.
						`

## Sheet: LC Gradient
	Table S4: Chromatographic Parameters
	Time	% Solv A	% Solv B
	0.01	75	25
	0.25	75	25
	0.75	60	40
	1.5	58	42
	4.25	50	50
	6.75	43	57
	8	39	61
	10.5	36	64
	11	33	67
	13	20	80
	13.3	15	85
	13.85	5	95
	14	0	100
	15.5	0	100
	15.68	75	25
	16.68	75	25
	1) Solvent A: 0.1% Acetic Acid 2) Solvent B: 90% Acetonitrile / 10% isopropanol 3) flow rate = 0.5 mL/min 4) column: 2.1 X 150mm, 1.7 µm Waters Acquity C18 BEH 5) column temp: 60°C. 6) Max pressure: 15000 psi. Expected: 80000-12000psi. 7) Sampe Temp: 15 °C

## Sheet: Quantitation Parameters
	Table S5: Quantitative parameters for (+/-)-ESI/MS/MS lipid mediator + NSAID analysis
	Compound	tR (min)		Concentration Range (nM)	ISTD a
	d4-Acetaminophen	0.89		[144 - 144]	PUHA_(+)
	Acetaminophen	0.9		[5.716 - 255200]	d4-Acetaminophen
	PUHA_(-)	1.84		[101 - 101]
	PUHA_(+)	1.84		[101 - 101]
	RvE1	2.16		[0.01248 - 891.6]	d4-PGF2a
	d4-6-Keto PGF1a	2.18		[24 - 24]	PUHA_(-)
	6-keto-PGF1a	2.18		[0.07557 - 5398]	d4-6-Keto PGF1a
	d4-PGF2a_EA	2.28		[24.9 - 24.9]	PUHA_(-)
	PGF2a_EA	2.29		[0.3522 - 15720]	d4-PGF2a_EA
	PGE2_EA	2.3		[0.354 - 15800]	d4-PGF2a_EA
	PGD2_EA	2.45		[0.354 - 15800]	d4-PGF2a_EA
	d4-TXB2	2.895		[53.4 - 53.4]	PUHA_(-)
	TXB2	2.9		[0.07557 - 5398]	d4-TXB2
	9,12,13-TriHOME	2.99		[0.02648 - 1891]	d4-PGF2a
	d4-PGF2a	3.03		[25.1 - 25.1]	PUHA_(-)
	PGF2a	3.05		[0.07899 - 5642]	d4-PGF2a
	F2-Isoprostanes	[2.6-3.5]		[0 - 0]	d4-PGF2a
	PGE2	3.1		[0.07943 - 5674]	d4-PGD2
	LXB4	3.21		[0.05902 - 4216]	d5-LXA4
	d4-PGD2	3.24		[25.2 - 25.2]	PUHA_(-)
	RvD2	3.25		[0.03718 - 1660]	d5-LXA4
	PGD2	3.26		[0.07943 - 5674]	d4-PGD2
	15-keto-PGE2	3.26		[0.1433 - 10240]	d4-PGD2
	d3-Naproxen	3.4		[107 - 107]	PUHA_(-)
	Naproxen	3.43		[5.471 - 244200]	d3-Naproxen
	RvD1	3.71		[0.02324 - 1660]	d5-LXA4
	d5-LXA4	3.74		[25.2 - 25.2]	PUHA_(-)
	LXA4	3.77		[0.03972 - 2837]	d5-LXA4
	RvE2	4.22		[0.02503 - 1788]	d4-PGF2a
	LTB5	4.68		[0.05495 - 3925]	d4-LTB4
	15,16-DiHODE	5.1	b	[0 - 0]	d11-14,15-DiHETrE
	12,13-DiHODE	5.15	b	[0 - 0]	d11-14,15-DiHETrE
	9,10-DiHODE	5.18	b	[0 - 0]	d11-14,15-DiHETrE
	8,15-DiHETE	5.2		[0.02488 - 1777]	d11-14,15-DiHETrE
	Protectin DX	5.41		[0.02427 - 1734]	d5-LXA4
	17,18-DiHETE	5.45		[0.02986 - 2133]	d11-14,15-DiHETrE
	5,15-DiHETE	5.49		[0.02488 - 1777]	d11-14,15-DiHETrE
	Maresin_1	5.56		[0.02427 - 1734]	d5-LXA4
	6-trans-LTB4	5.59		[0.026 - 1857]	d4-LTB4
	14,15-DiHETE	5.73		[0.02488 - 1777]	d11-14,15-DiHETrE
	d4-LTB4	5.82		[66.1 - 66.1]	CUDA_(-)
	LTB4	5.84		[0.026 - 1857]	d4-LTB4
	CUDA_(-)	5.85		[99.9 - 99.9]
	CUDA_(+)	5.85		[99.9 - 99.9]
	11,12-DiHETE	5.9		[0.04977 - 3555]	d11-14,15-DiHETrE
	d3-Ibuprofen	5.95		[95.6 - 95.6]	CUDA
	Ibuprofen	5.97		[5.543 - 247500]	d3-Ibuprofen
	12,13-DiHOME	6.07		[0.02782 - 1987]	d11-14,15-DiHETrE
	8,9-DiHETE	6.2		[0.01991 - 1422]	d11-14,15-DiHETrE
	9,10-DiHOME	6.41		[0.02671 - 1908]	d11-14,15-DiHETrE
	d11-14,15-DiHETrE	6.56		[25.7 - 25.7]	CUDA_(-)
	14,15-DiHETrE	6.64		[0.02585 - 1846]	d11-14,15-DiHETrE
	19,20-DiHDoPE	6.65		[0.07724 - 3448]	d11-14,15-DiHETrE
	5,6-DiHETE	6.77		[0.01991 - 1422]	d11-14,15-DiHETrE
	16,17-DiHDoPE	6.95		[0.06758 - 3017]	d11-14,15-DiHETrE
	11,12-DiHETrE	7.11		[0.02585 - 1846]	d11-14,15-DiHETrE
	13,14-DiHDoPE	7.12		[0.0662 - 2956]	d11-14,15-DiHETrE
	12(13)-Ep-9-KODE	7.285		[0.02708 - 1934]	d3-13-KODE
	9-HOTE	7.34		[0.02377 - 1698]	d4-9(S)-HODE
	10,11-DiHDoPE	7.38		[0.06694 - 2988]	d11-14,15-DiHETrE
	13-HOTE	7.45		[0.02377 - 1698]	d4-9(S)-HODE
	18-HEPE	7.45		[0.02629 - 1878]	d8-12-HETE
	8,9-DiHETrE	7.57		[0.02585 - 1846]	d11-14,15-DiHETrE
	15-deoxy_PGJ2	7.61		[0.03097 - 2212]	d3-13-KODE
	19(20)-EpDoPE_EA	7.73		[0.1445 - 6450]	d8-C20:4n6_EA
	9,10-DiHO	7.74		[0.1587 - 11340]	d11-14,15-DiHETrE
	15-HEPE	7.82		[0.05258 - 3756]	d8-12-HETE
	d6-20-HETE	7.83		[24.5 - 24.5]	CUDA_(-)
	20-HETE	7.87		[0.08736 - 3900]	d6-20-HETE
	7,8-DiHDoPE	7.90971		[0.06319 - 2821]	d11-14,15-DiHETrE
	12-HEPE	8.12		[0.02629 - 1878]	d8-12-HETE
	5,6-DiHETrE	8.22		[0.02585 - 1846]	d11-14,15-DiHETrE
	9-HEPE	8.29		[0.02629 - 1878]	d8-12-HETE
	11(12)-EpETrE_EA	8.41		[0.1387 - 6190]	d8-C20:4n6_EA
	13-HODE	8.56		[0.02683 - 1916]	d4-9(S)-HODE
	12-HODE	8.34		[0.05902 - 4216]	d4-9(S)-HODE
	10-HODE	8.61		[0.05902 - 4216]	d4-9(S)-HODE
	5-HEPE	8.62		[0.02629 - 1878]	d8-5(S)-HETE
	d4-9(S)-HODE	8.65		[26.6 - 26.6]	CUDA_(-)
	9-HODE	8.7		[0.02778 - 1984]	d4-9(S)-HODE
	13-HpODE	8.86	b	[0 - 0]	d4-9(S)-HODE
	17(18)-EpETE	8.81		[0.02629 - 1878]	d4-12(13)-EpOME
	15(16)-EpODE	8.66	b	[0 - 0]	d4-12(13)-EpOME
	9(10)-EpODE	8.8		[0 - 0]	d4-12(13)-EpOME
	d3-13-KODE	8.83		[26.9 - 26.9]	CUDA_(-)
	13-KODE	8.87		[0.02675 - 1911]	d3-13-KODE
	12(13)-EpODE	9.02	b	[0 - 0]	d4-12(13)-EpOME
	15-HETE	8.89		[0.0546 - 3900]	d8-12-HETE
	17-HDoHE	9.01		[0.02917 - 2083]	d8-12-HETE
	15-KETE	9.13		[0.08791 - 3925]	d3-13-KODE
	14(15)-EpETE	9.21		[0.02629 - 1878]	d4-12(13)-EpOME
	9-KODE	9.24		[0.02675 - 1911]	d3-13-KODE
	11-HETE	9.26		[0.0273 - 1950]	d8-12-HETE
	14-HDoHE	9.27		[0.02917 - 2083]	d8-12-HETE
	d8-12-HETE	9.36		[24.4 - 24.4]	CUDA_(-)
	9-HpODE	8.94	b	[0 - 0]	d4-9(S)-HODE
	11(12)-EpETE	9.4		[0.02629 - 1878]	d4-12(13)-EpOME
	12-HETE	9.44853		[0.0273 - 1950]	d8-12-HETE
	8(9)-EpETE	9.48		[0.02629 - 1878]	d4-12(13)-EpOME
	8-HETE	9.58538		[0.0273 - 1950]	d8-12-HETE
	12-KETE	9.67		[0.02716 - 1940]	d3-13-KODE
	7-HDoHE	9.69		[0.08128 - 3628]	d8-12-HETE
	9-HETE	9.75		[0.05495 - 3925]	d8-12-HETE
	N-C18:3n3_EA	9.99		[0.1742 - 7776]	d8-C20:4n6_EA
	d8-5(S)-HETE	10.01		[24.4 - 24.4]	CUDA_(-)
	19(20)-EpDoPE	10.1		[0.08128 - 3628]	d4-12(13)-EpOME
	5-HETE	10.11		[0.0273 - 1950]	d8-5(S)-HETE
	d4-12(13)-EpOME	10.11		[133 - 133]	CUDA_(-)
	N-C20:5n3_EA	10.11		[0.1621 - 7236]	d8-C20:4n6_EA
	12(13)-EpOME	10.18		[0.02683 - 1916]	d4-12(13)-EpOME
	14(15)-EpETrE	10.35		[0.0546 - 3900]	d4-12(13)-EpOME
	9(10)-EpOME	10.44		[0.02587 - 1848]	d4-12(13)-EpOME
	4-HDoHE	10.6		[0.02917 - 2083]	d8-5(S)-HETE
	16(17)-EpDoPE	10.55		[0.04064 - 1814]	d4-12(13)-EpOME
	13(14)-EpDoPE	10.67		[0.07315 - 3266]	d4-12(13)-EpOME
	N-16:1n7_EA	10.73		[0.1882 - 8403]	d8-C20:4n6_EA
	10(11)-EpDoPE	10.82		[0.07315 - 3266]	d4-12(13)-EpOME
	5-KETE	10.87		[0.08547 - 3816]	d3-13-KODE
	11(12)-EpETrE	10.93		[0.0273 - 1950]	d4-12(13)-EpOME
	7(8)-EpDoPE	11.11		[0.07315 - 3266]	d4-12(13)-EpOME
	8(9)-EpETrE	11.15		[0.0546 - 3900]	d4-12(13)-EpOME
	17-KDoHE	11.32		[0.07299 - 3259]	d3-13-KODE
	N-C20:4n6_Ser	11.6		[0.143 - 6386]	d8-C20:4n6_Gly
	4-KDoHE	11.73		[0.07358 - 3285]	d3-13-KODE
	N-C22:6n3_EA	11.73		[0.1507 - 6728]	d8-C20:4n6_EA
	d8-C20:4n6_EA	11.82		[28.1 - 28.1]	CUDA_(+)
	N-C18:2n6_EA	11.87		[0.1731 - 7728]	d8-C20:4n6_EA
	N-C20:4n6_EA	11.91		[0.1612 - 7194]	d8-C20:4n6_EA
	9(10)-EpO	12.1		[0.02805 - 2004]	d4-12(13)-EpOME
	N-C22:6n3_Gly	12.11		[0.1453 - 6485]	d8-C20:4n6_Gly
	d8-C20:4n6_Gly	12.19		[27.1 - 27.1]	CUDA_(+)
	N-C20:4n6_Gly	12.29		[0.1549 - 6916]	d8-C20:4n6_Gly
	N-C18:2n6_Gly	12.29		[0.1659 - 7407]	d8-C20:4n6_Gly
	N-C20:3n6_EA	12.83		[0.1602 - 7151]	d4-C16:0_EA
	C20:5n3	12.88	b	[0 - 0]	d8-C20:4n6
	C18:3n3	13	b	[0 - 0]	d8-C20:4n6
	d5-2-AG	12.95		[26.1 - 26.1]	CUDA_(+)
	d4-C16:0_EA	12.9		[26.4 - 26.4]	CUDA_(+)
	N-C16:0_EA	12.92		[0.187 - 8347]	d4-C16:0_EA
	2-AG	12.82		[0.2958 - 13210]	d5-2-AG
	1-AG	13.04		[0.2958 - 13210]	d5-2-AG
	2-LG	12.92		[0.3949 - 17630]	d5-2-AG
	1-LG	13.18		[0.3949 - 17630]	d5-2-AG
	N-C16:0_Gly	13.31		[0.1786 - 7974]	d8-C20:4n6_Gly
	N-C18:1n9_EA	13.42		[0.172 - 7680]	d4-C16:0_EA
	N-C22:4n6_EA	13.52		[0.1864 - 8320]	d4-C16:0_EA
	C22:6n3	13.65	b	[0 - 0]	d8-C20:4n6
	N-C18:1n9_Gly	13.78		[0.1649 - 7364]	d8-C20:4n6_Gly
	d8-C20:4n6	13.83		[25.6 - 25.6]	CUDA_(-)
	C20:4n6	13.88	b	[0 - 0]	d8-C20:4n6
	18:2n6	14.02	b	[0 - 0]	d8-C20:4n6
	2-OG	14.08		[0.4712 - 21040]	d5-2-AG
	1-OG	14.25		[0.5278 - 23560]	d5-2-AG
	N-C18:0_EA	14.45		[0.1709 - 7631]	d4-C16:0_EA
	N-C20:0_EA	15.08		[0.1312 - 5859]	d4-C16:0_EA
	N-C24:1n9_EA	15.54		[0.1553 - 6934]	d4-C16:0_EA
	a - ISTD (i.e. interna standard) associations with analytes used to correct quantification for analytical loss and suppression b - analyte levels estimated by ISTD adjusted peak area, but without a quantitative response factor calibration
