# Supplementary material for: Unveiling the “hidden quality” of the walnut pellicle: a precious source of bioactive lipids
Source: Front Plant Sci. 2024 Jun 18;15:1395543. doi: 10.3389/fpls.2024.1395543 (PMC11217525; doi:10.3389/fpls.2024.1395543)
Supplement: Supplementary Table 7 — Relative abundances (%) calculated for all metabolites detected by the three analytical platforms. [file Table_7.xlsx]

## Sheet: Platform 1
name	InChI Key	m/z	ESI mode	percent_abundance	platform
CE 20:2	NA	699.6024_694.6486	ESI pos	0.00323277	Lipids
Cer 34:2;3O|Cer 18:2;2O/16:0;O	BGCIWBMYVKHZNX-UHFFFAOYSA-N	534.486	ESI pos	0.00250602	Lipids
Cer 40:1;4O|Cer 23:1;3O/17:0;(2OH)	HKMSUOWJVKXALZ-UHFFFAOYSA-N	654.603	ESI pos	0.00476536	Lipids
Cer 57:9;4O|Cer 16:1;2O/41:8;2O	XWYSYZDCCBINGR-UHFFFAOYSA-N	858.74	ESI pos	0.157429	Lipids
Cer 59:12;4O|Cer 18:3;2O/41:9;2O	XTBDBNPRNHJNHY-UHFFFAOYSA-N	880.719	ESI pos	0.0424895	Lipids
DG 34:1	YEJYLHKQOBOSCP-OZKTZCCCSA-N	617.5113_612.558	ESI pos	0.00368865	Lipids
DG 34:2	SVXWJFFKLMLOHO-YAIZGCQRSA-N	631.4698_615.4958	ESI pos	0.0244261	Lipids
DG 34:3	BHGPPCIWDXQOMA-IXDOJJAKSA-N	610.5399_613.4795_608.525	ESI pos	0.0288861	Lipids
DG 36:2	AFSHUZFNMVJNKX-LLWMBOQKSA-N	659.5025_643.5281_638.5724	ESI pos	0.0139151	Lipids
DG 36:3	BLZVZPYMHLXLHG-JOBMVARSSA-N	657.4864_641.5122_636.557	ESI pos	0.0477251	Lipids
DG 36:4 Isomer A	MQGBAQLIFKSMEM-ZHARMHCNSA-N	655.47_639.496_634.5408	ESI pos	0.17249	Lipids
DG 36:5	ITGCIESKDJEEHN-UHFFFAOYSA-N	637.481	ESI pos	0.0179321	Lipids
DG 36:5|DG 18:2_18:3	PGXBELQFNRPKBC-UHFFFAOYSA-N	632.525	ESI pos	0.0460539	Lipids
DGDG 34:2|DGDG 16:0_18:2	QZXMUPATKGLZAP-UHFFFAOYSA-N	934.647	ESI pos	0.0152873	Lipids
DGDG 36:3|DGDG 18:1_18:2	KCWRXTZCUNBOLH-UHFFFAOYSA-N	960.661	ESI pos	0.00686694	Lipids
DGGA 36:3|DGGA 18:1_18:2	VBTJCNBNATWYNG-UHFFFAOYSA-N	812.589	ESI pos	0.00461828	Lipids
HexCer 34:2;3O|HexCer 18:2;2O/16:0;O	HOMYIYLRRDTKAA-UHFFFAOYSA-N	714.5521_696.5393	ESI pos	0.0226836	Lipids
HexCer 42:1;4O|HexCer 18:1;3O/24:0;(2OH)	QZNIVVAKPLIDJX-UHFFFAOYSA-N	844.686	ESI pos	0.0125846	Lipids
LPC 16:0	ASWBNKHCZGQVJV-HSZRJFAPSA-N	496.34	ESI pos	0.00876433	Lipids
LPC 18:0	IHNKQIMGVNPMTC-RUZDIDTESA-N	524.369	ESI pos	0.00300562	Lipids
LPC 18:1	YAMUFBLWGFFICM-PTGWMXDISA-N	522.356	ESI pos	0.00199605	Lipids
LPC 18:2	SPJFYYJXNPEZDW-FTJOPAKQSA-N	520.341	ESI pos	0.00699971	Lipids
LPC 18:3	WKQNRCYKYCKESD-YVHLTTHBSA-N	518.325	ESI pos	0.001044	Lipids
LPC 20:0	UATOAILWGVYRQS-HHHXNRCGSA-N	552.4	ESI pos	0.000641146	Lipids
LPE 18:2	NA	478.292	ESI pos	0.000800031	Lipids
PC 31:0	NPGWXTIWUUFYAB-DIPNUNPCSA-N	742.539	ESI pos	0.00275605	Lipids
PC 32:0	KILNVBDSWZSGLL-KXQOOQHDSA-N	734.568	ESI pos	0.00462824	Lipids
PC 33:1	OFRWLQSOUIZELQ-VEAYGOGPSA-N	746.566	ESI pos	0.00102698	Lipids
PC 33:2	SBNDHGBVMZMSNL-UESLNCBNSA-N	744.553	ESI pos	0.00144078	Lipids
PC 34:0	PZNPLUBHRSSFHT-RRHRGVEJSA-N	762.603	ESI pos	0.00138703	Lipids
PC 34:1	WTJKGGKOPKCXLL-VYOBOKEXSA-N	760.585	ESI pos	0.015437	Lipids
PC 34:2	JLPULHDHAOZNQI-ZTIMHPMXSA-N	758.5711_780.5516	ESI pos	0.231067	Lipids
PC 34:3 Isomer B	VKVSSDKCKXJFIM-AFYHZPHLSA-N	756.5543_778.5357	ESI pos	0.0197831	Lipids
PC 35:1	MFHIZGSSDZJFKD-IYEJTHTFSA-N	774.6	ESI pos	0.0012168	Lipids
PC 35:2 Isomer B	MJWAVUYQCBFFHQ-WESJWMGVSA-N	772.586	ESI pos	0.005114	Lipids
PC 36:2	SNKAWJBJQDLSFF-NVKMUCNASA-N	786.6017_808.5806	ESI pos	0.0454685	Lipids
PC 36:3 Isomer A	BXRLDROZWDUSGM-ZRYFCQOPSA-N	784.586	ESI pos	0.0493943	Lipids
PC 36:4 Isomer A	NKQPOVROGSWLTO-NVPMBMBWSA-N	782.5708_804.5521	ESI pos	0.112638	Lipids
PC 36:5 Isomer A	SUZYROYNFNQALJ-MHEIZRSESA-N	780.5533_802.5347	ESI pos	0.0211707	Lipids
PC 38:2	KXXLFCAPKGRXBT-FMJYHZMHSA-N	814.635	ESI pos	0.0015314	Lipids
PC 38:3	KNNHXKQRTYEWCA-HYYWERRFSA-N	812.616	ESI pos	0.00241922	Lipids
PC 38:5 Isomer B	YLWBKBDNHWQEFU-YJXJLLHLSA-N	808.583	ESI pos	0.00120796	Lipids
PC 38:6 Isomer C	PLZBTDKJYHXIEW-DZUXOTHRSA-N	806.577	ESI pos	0.00895098	Lipids
PI 34:2	YHPPEKFMAUATQU-UHFFFAOYSA-N	857.515	ESI pos	0.002866	Lipids
SM d30:1	HZCLJRFPXMKWHR-FEBLJDHQSA-N	647.507	ESI pos	0.00170196	Lipids
ST 29:1;O	KZJWDPNRJALLNS-UHFFFAOYSA-N	397.383	ESI pos	0.0111654	Lipids
TG 42:2	IDWYMMYRNPSLDA-NNBKTNTFSA-N	736.644	ESI pos	0.0038507	Lipids
TG 45:4;1O|TG 10:0_18:1_17:3;1O	LAWSRCVMDYXSCX-UHFFFAOYSA-N	790.655	ESI pos	0.0102027	Lipids
TG 45:5;1O|TG 10:0_18:2_17:3;1O	DNNSMDCFHPYUJX-UHFFFAOYSA-N	788.639	ESI pos	0.0331005	Lipids
TG 46:4;1O|TG 16:0_13:1_17:3;1O	YEMMUEPYJAOAQW-UHFFFAOYSA-N	804.671	ESI pos	0.00368971	Lipids
TG 48:2	RUOVJPPUXXFZPC-YZEIBMOJSA-N	820.74	ESI pos	0.00533211	Lipids
TG 48:4 Isomer A	GRAMQDDTGXQCSO-ZJPFCMILSA-N	821.6621_816.707	ESI pos	0.00256135	Lipids
TG 48:5	NA	814.689	ESI pos	0.000905493	Lipids
TG 48:5;1O|TG 13:1_18:2_17:2;1O	JJKLSOCSLCBNDV-UHFFFAOYSA-N	830.688	ESI pos	0.00459777	Lipids
TG 48:6;1O|TG 13:1_18:2_17:3;1O	ZJXUIBCREUAVJU-UHFFFAOYSA-N	828.671	ESI pos	0.00875331	Lipids
TG 48:7;1O|TG 13:1_18:2_17:4;1O	IAIMCCYJZMPABZ-UHFFFAOYSA-N	826.655	ESI pos	0.00484886	Lipids
TG 49:3	DIGMYZZFQSIQBD-PNLKURBTSA-N	832.738	ESI pos	0.00393526	Lipids
TG 50:0	MARPCPMDFOPPJX-UHFFFAOYSA-N	852.802	ESI pos	0.00523344	Lipids
TG 50:1	YHMDGPZOSGBQRH-YYSBDVFPSA-N	871.7128_855.7408	ESI pos	0.00657041	Lipids
TG 50:2	QEZWFCZNHWUARW-XQCAQTCHSA-N	853.7255_848.7724	ESI pos	0.314366	Lipids
TG 50:3 Isomer A	UFHNZOACKFBCOM-YXKNDSBASA-N	851.708	ESI pos	0.00176139	Lipids
TG 50:3 Isomer B	UFHNZOACKFBCOM-YXKNDSBASA-N	851.7112_846.7567	ESI pos	0.0571218	Lipids
TG 50:4	PVMBAGXWHHZKFP-JMPJWMFJSA-N	865.6683_849.6948_844.7407	ESI pos	0.0433338	Lipids
TG 50:5	AFTBPUXZTDLRSP-UDQIKIEDSA-N	863.6567_847.6788	ESI pos	0.00316807	Lipids
TG 50:6	YVQKDEFVOZTZOA-PVNINVEQSA-N	840.709	ESI pos	0.00904741	Lipids
TG 51:1	OZAXLAGNPZMZAD-BOEMPQCLSA-N	864.801	ESI pos	0.00386778	Lipids
TG 51:2	NSNSZGBCOIKUBU-SZOKBDNISA-N	867.7426_862.7863	ESI pos	0.0177565	Lipids
TG 51:3	ISSGPXMQOMAFMJ-DMGKHJLRSA-N	865.7273_860.772	ESI pos	0.0220096	Lipids
TG 51:4	IIRQXNVLAXQEKB-KBEZCZBDSA-N	863.7127_858.7558	ESI pos	0.0442982	Lipids
TG 51:5	DYYKLAQWCNBXRJ-UNZGPCCPSA-N	861.6922_856.7414	ESI pos	0.0378427	Lipids
TG 51:6|TG 15:1_18:2_18:3	UHOYSFKFVXYJBU-UHFFFAOYSA-N	854.723	ESI pos	0.0138777	Lipids
TG 52:1	NPCZZYKITFKRQZ-RFBIWTDZSA-N	883.7748_878.8193	ESI pos	0.142836	Lipids
TG 52:1|TG 8:0_22:0_22:1	NKAJUMHCINDCGW-UHFFFAOYSA-N	883.776	ESI pos	0.0287569	Lipids
TG 52:2	TXMWKTABZBAJCW-QLHBUVOUSA-N	897.7321_881.758_876.8072	ESI pos	1.41116	Lipids
TG 52:3	DQXQIWIQYYEGLG-MMWLGPPDSA-N	895.7165_879.7421_874.7893	ESI pos	3.23992	Lipids
TG 52:4	WHSWXEYWNPTUPW-HNJDVRDNSA-N	893.6998_877.7277_872.775	ESI pos	4.4646	Lipids
TG 52:4;1O|TG 16:1_18:1_18:2;1O	NCUVHOLDZAPUMH-UHFFFAOYSA-N	888.766	ESI pos	0.0814155	Lipids
TG 52:4;2O|TG 18:2_19:2_15:0;2O	IGQGKOISINHLBS-UHFFFAOYSA-N	904.761	ESI pos	0.00723049	Lipids
TG 52:4|TG 16:0_18:2_18:2	LXAWUIOWWNQCQA-UHFFFAOYSA-N	872.762	ESI pos	0.438448	Lipids
TG 52:4|TG 19:0_15:1_18:3	NSWONTPAOJSMGG-UHFFFAOYSA-N	877.729	ESI pos	0.0956309	Lipids
TG 52:5	CQZAAIKPSLHIBC-KDJOUNIJSA-N	891.6846_875.7114_870.7609	ESI pos	2.71209	Lipids
TG 52:5;1O|TG 18:2_18:3_16:0;1O	WPUXVKJIAPLMSO-UHFFFAOYSA-N	886.751	ESI pos	0.278493	Lipids
TG 52:5;2O|TG 18:2_19:3_15:0;2O	FBWAYNIEKNLMTM-UHFFFAOYSA-N	902.746	ESI pos	0.0205495	Lipids
TG 52:6	SSOSFUDNINFYLJ-KIYGNKBKSA-N	889.6706_873.6954_868.7424	ESI pos	0.59598	Lipids
TG 52:6;1O|TG 16:0_18:3_18:3;1O	NEARCVKCLXTTGF-UHFFFAOYSA-N	884.735	ESI pos	0.0644661	Lipids
TG 52:7|TG 16:2_18:2_18:3	GLZHPWPMVDTTOB-UHFFFAOYSA-N	866.724	ESI pos	0.039444	Lipids
TG 52:8|TG 16:2_18:3_18:3	CVTYUBZRISQRAD-UHFFFAOYSA-N	864.708	ESI pos	0.00489048	Lipids
TG 53:1	WWJIBIGWKGFVAQ-JNSYTQKUSA-N	892.834	ESI pos	0.00365956	Lipids
TG 53:2	RSINITWKVQRWSZ-RFVLVDBCSA-N	890.818	ESI pos	0.0154191	Lipids
TG 53:3	ZNQBEJJYVJSZLM-LEDQTTRKSA-N	888.803	ESI pos	0.0538038	Lipids
TG 53:4	BMSDHYZLQWTKSQ-LSJAAEOESA-N	907.7119_891.7426_886.7859	ESI pos	0.146719	Lipids
TG 53:5	QHYAATSKYBYSLG-BXDFBOBBSA-N	889.726_884.7703	ESI pos	0.0926143	Lipids
TG 53:6|TG 17:1_18:2_18:3	CRAKBYXKEQVYKV-UHFFFAOYSA-N	882.754	ESI pos	0.0482423	Lipids
TG 54:0	KKBWDSMULWDHME-UHFFFAOYSA-N	908.857	ESI pos	0.0194361	Lipids
TG 54:1	YFFIQXNTTVSKJC-NZEOUKRFSA-N	927.7785_911.8024_906.8491	ESI pos	0.0963677	Lipids
TG 54:2	WUUWGORPQFKFQN-XDVOZUNOSA-N	925.7639_909.7894_904.8379	ESI pos	0.748198	Lipids
TG 54:3	PHYFQTYBJUILEZ-IUPFWZBJSA-N	923.7468_907.7723_902.8205	ESI pos	2.78207	Lipids
TG 54:4	BRLGHZXETDWABO-NOFIOOQLSA-N	921.7304_905.7574_900.8058	ESI pos	4.37929	Lipids
TG 54:4;1O|TG 18:0_18:1_18:3;1O	IXPPUZKXNGHXLW-UHFFFAOYSA-N	916.798	ESI pos	0.0335043	Lipids
TG 54:5 Isomer A	OEJXMJPFOHYSIU-GRLFFVHSSA-N	919.7149_903.7426	ESI pos	0.239585	Lipids
TG 54:5;1O|TG 18:0_18:2_18:3;1O	LWVCLSHSLUMABY-UHFFFAOYSA-N	914.783	ESI pos	0.168959	Lipids
TG 54:5|TG 18:1_18:2_18:2	VVEBTVMJPTZDHO-UHFFFAOYSA-N	898.789	ESI pos	4.43927	Lipids
TG 54:6 Isomer A	HBOQXIRUPVQLKX-BBWANDEASA-N	917.7006_901.7265_896.7689	ESI pos	4.78779	Lipids
TG 54:6;1O|TG 18:1_18:2_18:3;1O	BIZYBMSSHGFOHB-UHFFFAOYSA-N	912.768	ESI pos	0.412739	Lipids
TG 54:6;1O|TG 18:2_18:2_18:2;1O	PEJGVKGDCQVMJQ-UHFFFAOYSA-N	912.766	ESI pos	0.124434	Lipids
TG 54:6;2O|TG 18:2_18:2_18:2;2O	WJBZGNANTKYZFX-UHFFFAOYSA-N	928.761	ESI pos	0.166631	Lipids
TG 54:6|TG 18:1_18:2_18:3	OTUIORVXGJUHBH-UHFFFAOYSA-N	896.772	ESI pos	2.16851	Lipids
TG 54:7 Isomer A	NA	915.6854_899.7168_894.7527	ESI pos	4.48203	Lipids
TG 54:7;1O|TG 18:2_18:2_18:3;1O	WPNABYOSCSUAOM-UHFFFAOYSA-N	910.751	ESI pos	0.879356	Lipids
TG 54:7;2O|TG 18:3_18:3_18:1;2O	RWPSDTLGGIRPKJ-UHFFFAOYSA-N	926.746	ESI pos	0.0830668	Lipids
TG 54:8;1O|TG 18:2_18:3_18:3;1O	IXIWBHWTKQYZDO-UHFFFAOYSA-N	908.736	ESI pos	0.419058	Lipids
TG 54:8;2O|TG 18:3_18:3_18:2;2O	QPYOYKYFJJIVJH-UHFFFAOYSA-N	924.729	ESI pos	0.0330956	Lipids
TG 54:8|TG 18:2_18:3_18:3	IMPMCCKWZKDAGE-UHFFFAOYSA-N	897.6961_892.739	ESI pos	3.37439	Lipids
TG 54:9;1O|TG 18:3_18:3_18:3;1O	XTGILNAGWOVVAM-UHFFFAOYSA-N	906.72	ESI pos	0.174869	Lipids
TG 54:9|TG 18:3_18:3_18:3	UBEIMDKGOYBUKT-UHFFFAOYSA-N	895.6791_890.729	ESI pos	1.58704	Lipids
TG 55:2	NA	923.7977_918.8498	ESI pos	0.0188267	Lipids
TG 55:3	NA	916.833	ESI pos	0.0143186	Lipids
TG 55:4|TG 19:0_18:2_18:2	IYZMWOIQHCERKV-UHFFFAOYSA-N	914.817	ESI pos	0.0392886	Lipids
TG 55:5|TG 19:1_18:2_18:2	RSJQEUQJRFQHAE-UHFFFAOYSA-N	912.801	ESI pos	0.0419636	Lipids
TG 56:0	NA	936.888	ESI pos	0.00695123	Lipids
TG 56:1	OCYFAHIHWCVZKS-FHSLLVMSSA-N	939.8287_934.8726	ESI pos	0.0373972	Lipids
TG 56:11;2O|TG 18:3_18:3_20:5;2O	XADZKJWJCOMYCJ-UHFFFAOYSA-N	946.728	ESI pos	0.0110995	Lipids
TG 56:2	PDEQUPGHMOMBFC-FYEHETCMSA-N	953.7897_937.8184_932.865	ESI pos	0.163178	Lipids
TG 56:3	QXMHHXQBBKDSSL-BAQZNRHJSA-N	951.7777_935.8039_930.8506	ESI pos	0.186295	Lipids
TG 56:4	YONCDTJKIZDSKQ-IYASBODOSA-N	949.7603_933.7885_928.8332	ESI pos	0.307611	Lipids
TG 56:5 Isomer B	UHEJWASONFIROS-YPSHDQQVSA-N	947.7452_926.8176_931.7721	ESI pos	0.311962	Lipids
TG 56:6	ZTNDRFCABXFVMY-WJTCTALZSA-N	945.7302_929.7577_924.804	ESI pos	0.129793	Lipids
TG 56:7 Isomer A	DODZUDCYRVWEOJ-GKZBLMSTSA-N	922.786	ESI pos	0.0373214	Lipids
TG 57:1	QLQFCWUGYPUXFE-MKFPQRGTSA-N	948.892	ESI pos	0.00857689	Lipids
TG 57:2	OQPANTOJGGHRCB-OEIGHXOUSA-N	951.8361_946.8795	ESI pos	0.0290711	Lipids
TG 57:3|TG 21:0_18:1_18:2	DBBVNPVUCZKTLC-UHFFFAOYSA-N	944.865	ESI pos	0.0172526	Lipids
TG 57:4|TG 21:0_18:2_18:2	CTPZQGUDKSDLOA-UHFFFAOYSA-N	942.849	ESI pos	0.0196619	Lipids
TG 58:1	OWZMHFAFGQCCNI-FBXRAONGSA-N	967.8604_962.9033	ESI pos	0.0208957	Lipids
TG 58:2	NFQQJRGJJVQGAV-MEADVOAOSA-N	981.8251_965.8505_960.8965	ESI pos	0.0739366	Lipids
TG 58:3	RFMSTHTUAZETPD-JJPHLYBUSA-N	979.8101_963.835_958.8799	ESI pos	0.0741278	Lipids
TG 58:4	CCKRHDUCFMOBKX-AAINFQTBSA-N	977.7906_961.8192_956.8649	ESI pos	0.0865583	Lipids
TG 58:5	NA	975.7774_959.8036_954.8481	ESI pos	0.0398537	Lipids
TG 58:6	GSNFRUMSEHHPSY-LCXCSEBNSA-N	973.7603_957.788_952.8322	ESI pos	0.0126207	Lipids
TG 59:2	ONQVFVNCAXIZPA-OEIGHXOUSA-N	995.8391_974.9114	ESI pos	0.0183202	Lipids
TG 59:3	GFWCWSZOZVIVJH-ZIURWEIWSA-N	972.895	ESI pos	0.0177325	Lipids
TG 59:4|TG 23:0_18:2_18:2	ANQPUWJPYXNDFZ-UHFFFAOYSA-N	970.881	ESI pos	0.0259221	Lipids
TG 60:1	NA	990.936	ESI pos	0.00885521	Lipids
TG 60:2	QPNVLDQSHXVPMG-JMYPUKFOSA-N	1009.8525_993.8793_988.9282	ESI pos	0.0296195	Lipids
TG 60:3	IJOXAPFYWITIHW-KUBXGBLDSA-N	1007.8434_991.8669_986.9123	ESI pos	0.0364798	Lipids
TG 60:4	WECVQMVSEHWZQR-ULZSGHTGSA-N	1005.827_989.8494_984.8958	ESI pos	0.0607634	Lipids
TG 60:5	NA	982.88	ESI pos	0.0167176	Lipids
TG 60:6	ZMJSZQBPVUGYMY-KUCWVPRQSA-N	980.864	ESI pos	0.0038381	Lipids
TG 62:1	NA	1018.97	ESI pos	0.00291025	Lipids
TG 62:2	NA	1016.96	ESI pos	0.00713393	Lipids
TG 62:3	QSEFCNRWIMUGOX-QFXJXGHKSA-N	1019.8909_1014.9438	ESI pos	0.00967985	Lipids
TG 62:4	AHXIACCOHSVLRP-ULZSGHTGSA-N	1017.8812_1012.9274	ESI pos	0.0156821	Lipids
TG 62:5|TG 26:1_18:2_18:2	OEXIKZYHPRWSJP-UHFFFAOYSA-N	1010.91	ESI pos	0.0059172	Lipids
TG 64:2	NA	1044.99	ESI pos	0.00236507	Lipids
TG 64:3	NA	1042.97	ESI pos	0.00278316	Lipids
TG 64:4	IABPCCHORNRSBT-ULZSGHTGSA-N	1040.96	ESI pos	0.00380592	Lipids
TG 81:10|TG 19:0_30:2_32:8	CAKIJDMSGJEQIK-UHFFFAOYSA-N	1272.09	ESI pos	0.0246562	Lipids
NA	NA	897.767	ESI pos	3.9994	Lipids
NA	NA	899.785	ESI pos	3.89158	Lipids
NA	NA	895.759	ESI pos	3.80061	Lipids
NA	NA	337.274	ESI pos	0.00882395	Lipids
NA	NA	875.151	ESI pos	0.00370798	Lipids
NA	NA	981.857	ESI pos	0.00352337	Lipids
NA	NA	961.7	ESI pos	0.0110474	Lipids
NA	NA	134.06	ESI pos	0.00326008	Lipids
NA	NA	617.514	ESI pos	0.00888371	Lipids
NA	NA	873.778	ESI pos	3.73496	Lipids
NA	NA	852.722	ESI pos	0.00373726	Lipids
NA	NA	964.834	ESI pos	0.0187203	Lipids
NA	NA	397.383	ESI pos	0.0155352	Lipids
NA	NA	335.259	ESI pos	0.0037364	Lipids
NA	NA	661.551	ESI pos	0.0101942	Lipids
NA	NA	902.73	ESI pos	0.181448	Lipids
NA	NA	898.773	ESI pos	0.0768644	Lipids
NA	NA	863.692	ESI pos	0.0183966	Lipids
NA	NA	599.503	ESI pos	0.00822825	Lipids
NA	NA	942.813	ESI pos	0.00453709	Lipids
NA	NA	903.735	ESI pos	0.0627908	Lipids
NA	NA	599.503	ESI pos	0.00628496	Lipids
NA	NA	954.849	ESI pos	0.010577	Lipids
NA	NA	950.817	ESI pos	0.00656632	Lipids
NA	NA	972.895	ESI pos	0.00957392	Lipids
NA	NA	898.78	ESI pos	3.22984	Lipids
NA	NA	894.703	ESI pos	0.0460861	Lipids
NA	NA	872.721	ESI pos	0.0463794	Lipids
NA	NA	427.267	ESI pos	0.00372895	Lipids
NA	NA	982.882	ESI pos	0.0274031	Lipids
NA	NA	337.274	ESI pos	0.016515	Lipids
NA	NA	930.771	ESI pos	0.00570753	Lipids
NA	NA	272.113	ESI pos	0.0032459	Lipids
NA	NA	898.846	ESI pos	0.0541261	Lipids
NA	NA	261.221	ESI pos	0.0105677	Lipids
NA	NA	935.683	ESI pos	0.00670278	Lipids
NA	NA	900.853	ESI pos	0.0963373	Lipids
NA	NA	965.731	ESI pos	0.00650855	Lipids
NA	NA	875.781	ESI pos	0.251947	Lipids
NA	NA	957.677	ESI pos	0.014952	Lipids
NA	NA	924.785	ESI pos	0.0610139	Lipids
NA	NA	982.843	ESI pos	0.00693389	Lipids

## Sheet: Platform 2
name	InChI Key	m/z	ESI mode	percent_abundance	platform
Valylphenylalanine	GJNDXQBALKCYSZ-UHFFFAOYSA-N	166.086	ESI pos	0.00651393	Phenols
Tyramine	DZGWFCGJZKJUFP-UHFFFAOYSA-N	121.065	ESI pos	0.00723378	Phenols
trans-Ferulic acid	KSEBMYQBYZTDHS-HWKANZROSA-N	177.055	ESI pos	0.136531	Phenols
Tetradecanedioic acid	HQHCYKULIHKCEB-UHFFFAOYSA-N	195.174	ESI pos	0.00614813	Phenols
Syringic acid	JMSVCTWVEWCHDZ-UHFFFAOYSA-N	199.06	ESI pos	0.00358856	Phenols
Stearamide	LYRFLYHAGKPMFH-UHFFFAOYSA-N	284.295	ESI pos	0.0040453	Phenols
Spiculisporic acid	TUXHHVJPGQUPCF-GUYCJALGSA-N	265.18	ESI pos	0.0153851	Phenols
Soyacerebroside II	HOMYIYLRRDTKAA-DNZXWUPJSA-N	696.541	ESI pos	0.00248779	Phenols
Simmondsin 2'-ferulate	GWXJMPVVJCHQIB-PDZFWYMXSA-N	339.107	ESI pos	0.0219318	Phenols
Shikimic acid	JXOHGGNKMLTUBP-HSUXUTPPSA-N	139.039	ESI pos	0.0296968	Phenols
Ser-Tyr	MALNXHYEPCSPPU-VHSXEESVSA-N	182.081	ESI pos	0.0103581	Phenols
Salsolinol	IBRKLUSXDYATLG-LURJTMIESA-N	163.075	ESI pos	0.00689916	Phenols
Quercitrin	OXGUCUVFOIWWQJ-HQBVPOQASA-N	449.108	ESI pos	0.00485643	Phenols
Pyridoxine	LXNHXLLTXMVWPM-UHFFFAOYSA-N	170.081	ESI pos	0.0562945	Phenols
Procyanidin B2	NA	579.15	ESI pos	0.109051	Phenols
Phytosphingosine	AERBNCYCJBRYDG-KSZLIROESA-N	318.3	ESI pos	0.0276881	Phenols
Palmitoleoyl ethanolamide	WFRLANWAASSSFV-FPLPWBNLSA-N	280.263	ESI pos	0.0034488	Phenols
Palmitamide	HSEMFIZWXHQJAE-UHFFFAOYSA-N	256.263	ESI pos	0.0101465	Phenols
Oleoyl ethylamide	JZJYYCFYGXPUMF-QXMHVHEDSA-N	310.31	ESI pos	0.00137125	Phenols
Oleamide	FATBGEAMYMYZAF-KTKRTIGZSA-N	282.279	ESI pos	0.0676845	Phenols
NG,NG-Dimethyl-L-arginine	YDGMGEXADBMOMJ-LURJTMIESA-N	203.15	ESI pos	0.0146402	Phenols
Narirutin	HXTFHSYLYXVTHC-TUURGLJWSA-N	273.075	ESI pos	0.0261044	Phenols
Naringenin-7-O-glucoside	DLIKSSGEMUFQOK-RGHIGTIISA-N	435.128	ESI pos	0.0258383	Phenols
N-Oleoylethanolamine	BOWVQLFMWHZBEF-KTKRTIGZSA-N	326.305	ESI pos	0.00720802	Phenols
N-Methyltryptamine	NCIKQJBVUNUXLW-UHFFFAOYSA-N	144.081	ESI pos	0.021557	Phenols
N-Benzyl-N,N-dimethyl-1-hexadecanaminium cation	QDYLMAYUEZBUFO-UHFFFAOYSA-N	360.362	ESI pos	0.000450249	Phenols
N-Acetyltryptophan	DZTHIGRZJZPRDV-UHFFFAOYSA-N	205.097	ESI pos	0.0357553	Phenols
N-(4-Ethylbenzyl)-N-methylamine	JCSDSVXBTRWEJS-UHFFFAOYSA-N	119.085	ESI pos	0.0353954	Phenols
myo-Inositol	CDAISMWEOUEBRE-GPIVLXJGSA-N	127.039	ESI pos	0.0122444	Phenols
Monoelaidin	RZRNAYUHWVFMIP-MDZDMXLPSA-N	265.252	ESI pos	0.000529948	Phenols
Melezitose	QWIZNVHXZXRPDR-WSCXOGSTSA-N	527.158	ESI pos	0.00589163	Phenols
Linoleoyl ethanolamide	KQXDGUVSAAQARU-HZJYTTRNSA-N	324.289	ESI pos	0.00908507	Phenols
L-Tyrosine	OUYCCCASQSFEME-UHFFFAOYSA-N	182.081	ESI pos	0.0554	Phenols
L-Tryptophan	QIVBCDIJIAJPQS-SECBINFHSA-N	188.071	ESI pos	0.0200897	Phenols
L-Glutamine	ZDXPYRJPNDTMRX-VKHMYHEASA-N	130.0498_147.0763	ESI pos	0.126639	Phenols
L-Carnitine	PHIQHXFUZVPYII-ZCFIWIBFSA-N	162.112	ESI pos	0.0175416	Phenols
Isoquercitin	OVSQVDMCBVZWGM-LQSBFMDOSA-N	465.102	ESI pos	0.00677666	Phenols
Harpagoside	NA	167.07	ESI pos	0.0219752	Phenols
Grevillic acid	JXIPYOZBOMUUCA-DAFODLJHSA-N	139.039	ESI pos	0.00695786	Phenols
Glycerophosphocholine	SUHOQUVVVLNYQR-MRVPVSSYSA-N	258.11	ESI pos	0.0343302	Phenols
Ginkgotoxin	SVINQHQHARVZFF-UHFFFAOYSA-N	152.057	ESI pos	0.0176911	Phenols
Erucamide	UAUDZVJPLUQNMU-KTKRTIGZSA-N	338.341	ESI pos	0.0193848	Phenols
Epicatechin	PFTAWBLQPZVEMU-UKRRQHHQSA-N	291.086	ESI pos	0.443795	Phenols
Ellagic acid	AFSDNFLWKVMVRB-UHFFFAOYSA-N	303.013	ESI pos	0.00871907	Phenols
Dodecanedioic acid	TVIDDXQYHWJXFK-UHFFFAOYSA-N	149.1324_195.1379	ESI pos	0.0809577	Phenols
DL-Arginine	ODKSFYDXXFIFQN-UHFFFAOYSA-N	175.119	ESI pos	0.0677818	Phenols
Dimethyl sebacate	ALOUNLDAKADEEB-UHFFFAOYSA-N	149.096	ESI pos	0.0108591	Phenols
Dihydrophaseic acid	XIVFQYWMMJWUCD-FJBUYRLMSA-N	265.1433_247.1327	ESI pos	0.236705	Phenols
Diethyltoluamide	MMOXZBCLCQITDF-UHFFFAOYSA-N	192.138	ESI pos	0.00409799	Phenols
D-Fructose	BJHIKXHVCXFQLS-UYFOZJQFSA-N	127.039	ESI pos	0.0529212	Phenols
Creatine	CVSVTCORWBXHQV-UHFFFAOYSA-N	132.077	ESI pos	0.00567855	Phenols
Citrulline	RHGKLRLOHDJJDR-BYPYZUCNSA-N	159.0763_176.1029	ESI pos	0.246363	Phenols
cis-11,14-Eicosadienoic acid	XSXIVVZCUAHUJO-HZJYTTRNSA-N	309.279	ESI pos	0.00176855	Phenols
Choline cation	OEYIOHPDSNJKLS-UHFFFAOYSA-N	104.107	ESI pos	3.14928	Phenols
Betaine	KWIUHFFTVRNATP-UHFFFAOYSA-N	118.086	ESI pos	0.249668	Phenols
Benzyldimethyltetradecylammonium cation	WNBGYVXHFTYOBY-UHFFFAOYSA-N	332.331	ESI pos	0.00159401	Phenols
Ambrosic acid	ZONXEWIGPLHXNT-ULEBWITMSA-N	282.17	ESI pos	0.00130482	Phenols
9(10)-Epoxy-12Z-octadecenoic acid	FBUKMFOXMZRGRB-XKJZPFPASA-N	297.242	ESI pos	0.00499309	Phenols
9,10-Dihydrojasmonic acid	PQEYTAGBXNEUQL-NXEZZACHSA-N	177.127	ESI pos	0.00750136	Phenols
9-Oxo-10E,12Z-octadecadienoic acid	LUZSWWYKKLTDHU-ZJHFMPGASA-N	277.216	ESI pos	0.00815556	Phenols
9-Hydroperoxy-10E,12Z,15Z-octadecatrienoic acid	RWKJTIHNYSIIHW-MEBVTJQTSA-N	293.211	ESI pos	0.00508757	Phenols
7,8-Dihydro-.alpha.-ionone	JHJCHCSUEGPIGE-UHFFFAOYSA-N	177.1638_195.1743	ESI pos	0.0131943	Phenols
6-Thioinosine	NKGPJODWTZCHGF-DEGSGYPDSA-N	285.06	ESI pos	0.00833596	Phenols
6-O-((2Z)-3-(4-Hydroxy-3-methoxyphenyl)prop-2-enoyl)-.beta.-D-fructofuranosyl 6-O-acetyl-.alpha.-D-glucopyranoside	ZIUKDKVKRXUKAP-GOJYQDROSA-N	177.0546_339.1073	ESI pos	0.0140072	Phenols
5-[(1E,3E)-Hepta-1,3-dienyl]-2,3-dihydroxycyclopentane-1-carboxylic acid	QNHUKXZHEMSPPA-YTXTXJHMSA-N	223.133	ESI pos	0.00328343	Phenols
5-(Hydroxymethyl)-3-(1-hydroxy-4-methylhexyl)oxolan-2-one	KWEIJKWXQKCOKC-UHFFFAOYSA-N	213.148	ESI pos	0.0391073	Phenols
5-(6-Methyl-7-oxooctyl)furan-2(5H)-one	MSOHKYKACHEERC-UHFFFAOYSA-N	225.148	ESI pos	0.0398172	Phenols
4,4,7a-Trimethyl-3a,5,6,7-tetrahydro-3H-indene-1-carboxylic acid	ACQRUPZAAPLQQP-UHFFFAOYSA-N	191.143	ESI pos	0.0249613	Phenols
4-O-p-Coumaroylquinic acid	XWRHBGVVCOSNKO-OTCYKTEZSA-N	339.107	ESI pos	0.00730822	Phenols
4-Hydroxy-4-[(E)-3-hydroxybut-1-enyl]-3,5,5-trimethylcyclohex-2-en-1-one	KPQMCAKZRXOZLB-AATRIKPKSA-N	189.127	ESI pos	0.0180164	Phenols
4-(Acetyloxy)-3-methoxybenzoic acid	WTPDKEAYVAXNRO-UHFFFAOYSA-N	169.049	ESI pos	0.00784555	Phenols
4-(4-Hydroxy-2,6,6-trimethylcyclohex-1-en-1-yl)butan-2-yl .beta.-D-glucopyranoside	QOLJILMTPKQQQA-KWEBYEANSA-N	213.1848_375.2375	ESI pos	0.0109202	Phenols
4-(2,6,6-Trimethyl-4-oxocyclohex-2-en-1-yl)butan-2-yl 6-O-(3,4,5-trihydroxybenzoyl)hexopyranoside	CBGLETFGTARBGG-UHFFFAOYSA-N	211.169	ESI pos	0.0157897	Phenols
4-(2,6,6-Trimethyl-3-oxocyclohex-1-en-1-yl)butan-2-yl .beta.-D-glucopyranoside	MRTYYJWDYPABSE-CAOIYLRSSA-N	211.169	ESI pos	0.0897482	Phenols
3,5,7,3',4'-Pentahydroxyflavanone	CXQWRCVTCMQVQX-UHFFFAOYSA-N	305.065	ESI pos	0.00638702	Phenols
3,5-Dimethoxy-4-hydroxycinnamic acid	PCMORTLOPMLEFB-ONEGZZNKSA-N	225.076	ESI pos	0.00453465	Phenols
3,4'-Dihydroxypropiophenone	LTEPZFZSPZASKJ-UHFFFAOYSA-N	167.07	ESI pos	0.0651574	Phenols
3,4,5-Trimethacarb	AUQAUAIUNJIIEP-UHFFFAOYSA-N	137.096	ESI pos	0.02515	Phenols
3,4,2',4',6'-Pentahydroxychalcone	CRBYNQCDRNZCNX-DUXPYHPUSA-N	289.07	ESI pos	0.00673671	Phenols
3,4-Methylenedioxy-.alpha.-pyrrolidinobutyrophenone	OLVLMDVPMCIBQW-UHFFFAOYSA-N	161.06	ESI pos	0.067909	Phenols
3-Pyridinemethanol	MVQVNTPHUGQQHK-UHFFFAOYSA-N	110.06	ESI pos	1.55397	Phenols
3-Methoxycinnamic acid	LZPNXAULYJPXEH-AATRIKPKSA-N	179.07	ESI pos	0.00207179	Phenols
3-Hydroxy-5-methoxy-3-methyl-5-oxopentanoic acid	UNHGPASVFNKZNR-UHFFFAOYSA-N	141.055	ESI pos	0.00640923	Phenols
3-Hydroxy-2-((9Z,12Z)-octadeca-9,12-dienoyloxy)propyl 2-(trimethylazaniumyl)ethyl phosphate	LSUXCWJOIAWGOU-UTJQPWESSA-N	520.34	ESI pos	0.0152274	Phenols
3-Cyclohexyl-3-oxopropanoic acid ethyl ester	ASYASKBLHYSMEG-UHFFFAOYSA-N	171.102	ESI pos	0.00820468	Phenols
3-(3-(.beta.-D-Glucopyranosyloxy)-2-methoxyphenyl)propanoic acid	NA	376.16	ESI pos	0.0164221	Phenols
2(5H)-Furanone, 5-(7-hydroxy-6-methyloctyl)-	AEPMKZIOUKHDOO-UHFFFAOYSA-N	209.154	ESI pos	0.0820601	Phenols
2-Phenylethyl 6-O-pentopyranosylhexopyranoside	ZRGXCWYRIBRSQA-UHFFFAOYSA-N	434.202	ESI pos	0.00932377	Phenols
2-Methylcinnamic acid	RSWBWHPZXKLUEX-VOTSOKGWSA-N	145.065	ESI pos	0.0158237	Phenols
2-cis-4-trans-Abscisic acid	JLIDBLDQVAYHNE-YKALOCIXSA-N	265.143	ESI pos	0.0116774	Phenols
2-Adamantanone	IYKFYARMMIESOX-UHFFFAOYSA-N	133.101	ESI pos	0.0107759	Phenols
2-(4-t-butylphenoxy)cyclohexanol	FTIXUILRMBSXNS-UHFFFAOYSA-N	107.049	ESI pos	0.0235509	Phenols
2-(4-Methylphenyl)-2,3-dihydro-4H-chromen-4-one	HITISLKGAFZTFZ-INIZCTEOSA-N	121.028	ESI pos	0.00939254	Phenols
2-(4-Hydroxyphenyl)ethyl 6-O-((2-oxo-2,3-dihydro-1H-indol-3-yl)acetyl)-.beta.-D-glucopyranoside	YOTVUKXKJYRTAR-NAJYVHOLSA-N	336.108	ESI pos	0.00805923	Phenols
13S-Hydroxy-9Z,11E,15Z-octadecatrienoic acid	KLLGGGQNRTVBSU-FQSPHKRJSA-N	277.216	ESI pos	0.00606233	Phenols
13-Keto-9Z,11E-octadecadienoic acid	JHXAZBBVQSRKJR-BSZOFBHHSA-N	295.226	ESI pos	0.0304444	Phenols
10-Hydroxy-2-decenoic acid	QHBZHVUGQROELI-SOFGYWHQSA-N	133.101	ESI pos	0.0318365	Phenols
10-Hendecenoic acid	FRPZMMHWLSIFAZ-UHFFFAOYSA-N	167.143	ESI pos	0.00778345	Phenols
1,6-Anhydro-.beta.-D-glucose	TWNIBLMWSKIRAT-VFUOTHLCSA-N	145.0495_163.06	ESI pos	0.0569692	Phenols
1,5-Pentanediamine	VHRGRCVQAFMJIZ-UHFFFAOYSA-N	86.0965	ESI pos	0.0516123	Phenols
1,2,6-Trigalloylglucose	LLENXGNWVNSBQG-VFTFQOQOSA-N	654.13	ESI pos	0.00367331	Phenols
1,2,3,4-Tetrahydro-6-quinolinecarboxylic acid	ARNALYPZOYPNAF-UHFFFAOYSA-N	160.076	ESI pos	0.538478	Phenols
1,2,3,3-Tetramethylbicyclo[2.2.1]heptan-2-ol	AJVKAPQCJKEUSG-UHFFFAOYSA-N	109.101	ESI pos	0.0728059	Phenols
1,2,3-Tris-O-(3,4,5-trihydroxybenzoyl)-.beta.-D-glucopyranose	MACFXELYCBWKGT-VFTFQOQOSA-N	619.093	ESI pos	0.0325986	Phenols
1,2-Dilinoleoylglycerol	MQGBAQLIFKSMEM-MAZCIEHSSA-N	634.54	ESI pos	0.00211348	Phenols
1-Stearoyl-2-hydroxy-sn-glycero-3-phosphoethanolamine	BBYWOYAFBUOUFP-JOCHJYFZSA-N	482.324	ESI pos	0.000820056	Phenols
1-Stearoyl-2-hydroxy-sn-glycero-3-phosphocholine	IHNKQIMGVNPMTC-RUZDIDTESA-N	524.371	ESI pos	0.00388556	Phenols
1-Palmitoyl-sn-glycero-3-phosphocholine	ASWBNKHCZGQVJV-HSZRJFAPSA-N	496.339	ESI pos	0.0186978	Phenols
1-Palmitoyl-2-hydroxy-sn-glycero-3-phosphoethanolamine	YVYMBNSKXOXSKW-HXUWFJFHSA-N	454.293	ESI pos	0.00659051	Phenols
1-Oleoyl-sn-glycero-3-phosphocholine	YAMUFBLWGFFICM-PTGWMXDISA-N	522.355	ESI pos	0.00268112	Phenols
1-Monolinoleoyl-rac-glycerol	WECGLUPZRHILCT-HZJYTTRNSA-N	355.284	ESI pos	0.00385917	Phenols
1-Heptadecanoyl-sn-glycero-3-phosphocholine	SRRQPVVYXBTRQK-XMMPIXPASA-N	510.356	ESI pos	0.00297764	Phenols
1-(4-Hydroxyphenyl)propane-1,2-diol	PIYCCGIPUXJHIW-UHFFFAOYSA-N	151.075	ESI pos	0.00843285	Phenols
1-(2-Hydroxyethyl)pyrazole	DXFBKDSQMUFYLD-UHFFFAOYSA-N	113.071	ESI pos	0.0237487	Phenols
(Z)-9,12,13-Trihydroxyoctadec-15-enoic acid	DNWUYCUUEGGVPR-CLTKARDFSA-N	277.216	ESI pos	0.00612285	Phenols
(E)-3,10-Dihydroxy-4,9-dimethyldodec-6-enedioic acid	FIDISSFBBFUTOK-ONEGZZNKSA-N	253.1433_289.1644	ESI pos	0.0255991	Phenols
(E)-.alpha.-Ionone	UZFLPKAIBPNNCA-BQYQJAHWSA-N	175.1481_193.1587	ESI pos	0.0221174	Phenols
(9E,11Z)-8-Hydroxyoctadeca-9,11-dienoic acid	NTYHQKJCCYNCMG-LMEHAKNHSA-N	279.232	ESI pos	0.0085096	Phenols
(5S)-5-(1-Hydroxy-1-methylethyl)-2-methyl-2-cyclohexen-1-one	DJOOMNLGIUGRKD-QMMMGPOBSA-N	151.112	ESI pos	0.00688216	Phenols
(4-(.beta.-D-Glucopyranosyloxy)phenyl)acetic acid	YHJWCNZGHBFVTB-RGCYKPLRSA-N	332.134	ESI pos	0.0443489	Phenols
(3E)-4-(1-Hydroxy-2,6,6-trimethyl-4-oxocyclohex-2-en-1-yl)but-3-en-2-yl 2-O-hexopyranosylhexopyranoside	IVORNVLYHQXABJ-AATRIKPKSA-N	207.138	ESI pos	0.00928157	Phenols
(2R)-2-(4-Isobutylphenyl)-N-mesylpropionamide	KQDRVXQXKZXMHP-LLVKDONJSA-N	161.132	ESI pos	0.00822352	Phenols
(2E)-3,4,7-Trimethylocta-2,6-dien-1-ol	ZPIKDJYPRJOHLN-YRNVUSSQSA-N	151.148	ESI pos	0.0122542	Phenols
(2E,5E)-3,5,7-Trimethylocta-2,5-dienedioic acid	WLVNOJMYBIEIPJ-KQQUZDAGSA-N	149.096	ESI pos	0.0174836	Phenols
(12Z,15Z)-9,10,11-Trihydroxyoctadeca-12,15-dienoic acid	KFINXCASWPGHEW-UYOLCUGSSA-N	275.2	ESI pos	0.00902681	Phenols
(+)-Abscisic acid	JLIDBLDQVAYHNE-LXGGSRJLSA-N	247.133	ESI pos	0.0174459	Phenols
((1R,4S,5R,8S,9R)-4-Isopropyl-6,8,9-trimethyl-3-oxabicyclo[3.3.1]non-6-en-1-yl)methanol	BNAPJYMSXNSYQF-HLTWPCROSA-N	135.117	ESI pos	0.0105705	Phenols
(-)-Globulol	AYXPYQRXGNDJFU-QTPLKFIXSA-N	149.132	ESI pos	0.00760887	Phenols
(-)-Catechin gallate	LSHVYAFMTMFKBA-CTNGQTDRSA-N	443.097	ESI pos	0.00628309	Phenols
.alpha.,.beta.-Trehalose	HDTRYLNUVZCQOY-BTLHAWITSA-N	360.15	ESI pos	0.229108	Phenols
.alpha.,.beta.-Thujone	USMNOWBWPHYOEA-VWHDNNRLSA-N	107.085	ESI pos	0.0134085	Phenols
.alpha.-Pinene oxide	NQFUSWIGRKFAHK-UHFFFAOYSA-N	135.117	ESI pos	0.0151978	Phenols
.alpha.-Guanidinoglutaric acid	RHVVRMJOHATSPD-VKHMYHEASA-N	148.06	ESI pos	0.103808	Phenols
NA	NA	295.227	ESI pos	0.00441919	Phenols
NA	NA	135.117	ESI pos	0.00736488	Phenols
NA	NA	209.154	ESI pos	0.0365474	Phenols
NA	NA	207.138	ESI pos	0.00221074	Phenols
NA	NA	207.138	ESI pos	0.0447461	Phenols
NA	NA	373.222	ESI pos	1.01633	Phenols
NA	NA	119.085	ESI pos	0.00677148	Phenols
NA	NA	84.0114	ESI pos	0.0195834	Phenols
NA	NA	82.0139	ESI pos	0.129515	Phenols
NA	NA	86.0601	ESI pos	0.0150058	Phenols
NA	NA	84.0445	ESI pos	0.0169566	Phenols
NA	NA	87.0441	ESI pos	0.0174081	Phenols
NA	NA	85.0285	ESI pos	0.0530361	Phenols
NA	NA	92.5412	ESI pos	0.00457005	Phenols
NA	NA	89.5228	ESI pos	0.00529537	Phenols
NA	NA	93.0699	ESI pos	0.00374631	Phenols
NA	NA	91.0542	ESI pos	0.00951066	Phenols
NA	NA	93.0699	ESI pos	0.00209512	Phenols
NA	NA	91.0543	ESI pos	0.00426576	Phenols
NA	NA	91.5424	ESI pos	0.0291871	Phenols
NA	NA	99.0441	ESI pos	0.00770097	Phenols
NA	NA	97.0285	ESI pos	0.0460613	Phenols
NA	NA	101.031	ESI pos	0.062529	Phenols
NA	NA	100.024	ESI pos	0.172651	Phenols
NA	NA	102.022	ESI pos	0.0285989	Phenols
NA	NA	107.001	ESI pos	0.0832002	Phenols
NA	NA	105.003	ESI pos	0.527497	Phenols
NA	NA	105.07	ESI pos	0.00655465	Phenols
NA	NA	107.085	ESI pos	0.00215227	Phenols
NA	NA	105.07	ESI pos	0.0010561	Phenols
NA	NA	112.006	ESI pos	0.0697751	Phenols
NA	NA	110.009	ESI pos	0.509154	Phenols
NA	NA	116.071	ESI pos	0.0798478	Phenols
NA	NA	118.975	ESI pos	0.00825803	Phenols
NA	NA	116.977	ESI pos	0.0848052	Phenols
NA	NA	121.101	ESI pos	0.00247156	Phenols
NA	NA	119.085	ESI pos	0.00591064	Phenols
NA	NA	121.101	ESI pos	0.00983426	Phenols
NA	NA	123.044	ESI pos	0.00377979	Phenols
NA	NA	124.923	ESI pos	0.0086961	Phenols
NA	NA	122.924	ESI pos	0.0633713	Phenols
NA	NA	124.024	ESI pos	0.0161462	Phenols
NA	NA	123.014	ESI pos	0.0589455	Phenols
NA	NA	125.011	ESI pos	0.00894332	Phenols
NA	NA	125.038	ESI pos	0.00176275	Phenols
NA	NA	123.04	ESI pos	0.0163108	Phenols
NA	NA	126.055	ESI pos	0.00392649	Phenols
NA	NA	124.039	ESI pos	0.00981222	Phenols
NA	NA	128.019	ESI pos	1.58149	Phenols
NA	NA	130.017	ESI pos	0.245304	Phenols
NA	NA	130.011	ESI pos	0.0107113	Phenols
NA	NA	129.013	ESI pos	0.0521661	Phenols
NA	NA	131.118	ESI pos	0.00173238	Phenols
NA	NA	129.102	ESI pos	0.00527024	Phenols
NA	NA	132.102	ESI pos	0.172975	Phenols
NA	NA	130.086	ESI pos	0.007543	Phenols
NA	NA	133.105	ESI pos	0.0106245	Phenols
NA	NA	134.081	ESI pos	0.00749757	Phenols
NA	NA	132.102	ESI pos	0.220836	Phenols
NA	NA	134.996	ESI pos	0.0158235	Phenols
NA	NA	132.998	ESI pos	0.108591	Phenols
NA	NA	135.08	ESI pos	0.0019314	Phenols
NA	NA	133.065	ESI pos	0.00205272	Phenols
NA	NA	133.101	ESI pos	0.00186075	Phenols
NA	NA	135.117	ESI pos	0.00264771	Phenols

## Sheet: Platform 3
name	InChI Key	m/z	ESI mode	percent_abundance	platform
xylulose	LQXVFWRQNMEDEE-PYHARJCCSA-N	173	NA	0.0215744	Primary
xylose	SRBFZHDQGSBBOR-IOVATXLUSA-N	103	NA	6.25791	Primary
xylitol	HEBKCHPVOIAQTA-NGQZWQHPSA-N	217	NA	0.0438953	Primary
xanthine	LRFVTYWOQMYALW-UHFFFAOYSA-N	353	NA	0.00417851	Primary
vanillic acid	WKOLLVMJNQIZCI-UHFFFAOYSA-N	297	NA	0.0746187	Primary
valine	KZSNJWFQEVHDMF-BYPYZUCNSA-N	156	NA	0.0706539	Primary
uric acid	LEHOTFFKMJEONL-UHFFFAOYSA-N	456	NA	0.00510889	Primary
urea	XSQUKJJJFZCRTK-UHFFFAOYSA-N	189	NA	0.0700155	Primary
UDP-N-acetylglucosamine	LFTYTUAZOPRMMI-CFRASDGPSA-N	226	NA	0.00483412	Primary
UDP-glucuronic acid	HDYANYHVCAPMJV-LXQIFKJMSA-N	217	NA	0.327644	Primary
tyrosol	YCCILVSKPBXVIP-UHFFFAOYSA-N	179	NA	0.064414	Primary
tyrosine	OUYCCCASQSFEME-QMMMGPOBSA-N	218	NA	0.0291534	Primary
trisaccharide	FYGDTMLNYKFZSV-UHFFFAOYSA-N	361	NA	0.0408388	Primary
trehalose	HDTRYLNUVZCQOY-LIZSDCNHSA-N	191	NA	0.052014	Primary
tocopherol gamma-	QUEDXNHFTDJVIY-DQCZWYHMSA-N	223	NA	0.389587	Primary
tocopherol delta-	GZIFEOYASATJEH-VHFRWLAGSA-N	208	NA	0.0939932	Primary
tocopherol beta	WGVKWNUPNGFDFJ-CBIUGAAKSA-N	223	NA	0.0237021	Primary
tocopherol alpha-	NCYCYZXNIZJOKI-OVSJKPMPSA-N	237	NA	0.116502	Primary
thymidine	IQFYYKKMVGJFEH-XLPZGREQSA-N	170	NA	0.0081404	Primary
threonic acid	JPIJQSOTBSSVTP-STHAYSLISA-N	292	NA	0.0204659	Primary
threitol	UNXHWFMMPAWVPI-QWWZWVQMSA-N	217	NA	0.0869478	Primary
terephthalic acid	KKEYFWRCBNTPAC-UHFFFAOYSA-N	295	NA	0.0256296	Primary
tartaric acid	FEWJPZIEWOKRBE-JCYAYHJZSA-N	292	NA	0.00864859	Primary
tagatose	LKDRXBCSQODPBY-OEXCPVAWSA-N	307	NA	0.00490742	Primary
syringic acid	JMSVCTWVEWCHDZ-UHFFFAOYSA-N	179	NA	0.0248512	Primary
sucrose	CZMRCDWAGMRECN-UGDNZRGBSA-N	271	NA	2.0776	Primary
succinic acid	KDYFGRWQOYBRFD-UHFFFAOYSA-N	247	NA	0.00733083	Primary
sorbitol	FBPFZTCFMRRESA-JGWLITMVSA-N	217	NA	0.16628	Primary
sinigrin	QKFAFSGJTMHRRY-OCFLFPRFSA-M	361	NA	0.00602862	Primary
sinapinic acid	PCMORTLOPMLEFB-ONEGZZNKSA-N	338	NA	0.0123554	Primary
shikimic acid	JXOHGGNKMLTUBP-HSUXUTPPSA-N	204	NA	0.104398	Primary
serotonin	QZAYGJVTTNCVMB-UHFFFAOYSA-N	174	NA	0.644029	Primary
saccharic acid	DSLZVSRJTYRBFB-LLEIAEIESA-N	333	NA	0.0892615	Primary
ribulose	ZAQJHHRNXZUBTE-NQXXGFSBSA-N	173	NA	0.0206514	Primary
ribose	HMFHBZSHGGEWLO-SOOFDHNKSA-N	217	NA	0.0926075	Primary
ribonic acid	QXKAIJAYHKCRRA-BXXZVTAOSA-N	292	NA	0.0142726	Primary
raffinose	MUPFEKGTMRGPLJ-ZQSKZDJDSA-N	361	NA	0.343903	Primary
quinic acid	AAWZDTNXLSGCEK-LNVDRNJUSA-N	345	NA	0.0136895	Primary
pyrogallol	WQGWDDDVZFFDIG-UHFFFAOYSA-N	239	NA	0.34357	Primary
pyridoxine	LXNHXLLTXMVWPM-UHFFFAOYSA-N	280	NA	0.0475607	Primary
putrescine	KIDHWZJUCRJVML-UHFFFAOYSA-N	174	NA	0.237906	Primary
prunin	DLIKSSGEMUFQOK-SFTVRKLSSA-N	332	NA	0.0531884	Primary
propyleneglycol	DNIAPMSPPWPWGF-GSVOUGTGSA-N	117	NA	0.312981	Primary
pinitol	DSCFFEYYQKSRSV-FEPQRWDDSA-N	260	NA	0.00694262	Primary
phosphate	NBIIXXVUZAFLBC-UHFFFAOYSA-N	314	NA	0.105064	Primary
phenylethylamine	BHHGXPLMPWCGHP-UHFFFAOYSA-N	174	NA	0.00816579	Primary
perseitol	OXQKEKGBFMQTML-RYRJNEICSA-N	319	NA	0.007735	Primary
pentono-gamma-lactone	CUOKHACJLGPRHD-UHFFFAOYSA-N	244	NA	0.00770838	Primary
pentitol	HEBKCHPVOIAQTA-UHFFFAOYSA-N	307	NA	0.00926284	Primary
oxoproline	ODHCTXKNWHHXJC-VKHMYHEASA-N	156	NA	0.2627	Primary
ornithine	AHLPHDHHMVZTML-BYPYZUCNSA-N	142	NA	0.0230408	Primary
oleic acid	ZQPPMHVWECSIRJ-KTKRTIGZSA-N	339	NA	0.0777685	Primary
oleamide	FATBGEAMYMYZAF-KTKRTIGZSA-N	144	NA	0.00411504	Primary
nicotinic acid	PVNIIMVLHYAWGP-UHFFFAOYSA-N	180	NA	0.0189638	Primary
N-acetylmannosamine	OVRNDRQMDRJTHS-OZRXBMAMSA-N	202	NA	0.0511463	Primary
myo-inositol	CDAISMWEOUEBRE-UHFFFAOYSA-N	305	NA	3.24453	Primary
mucic acid	DSLZVSRJTYRBFB-DUHBMQHGSA-N	333	NA	0.117955	Primary
monoheptadecanoyl glyceride	SVUQHVRAGMNPLW-UHFFFAOYSA-N	385	NA	0.00416664	Primary
melibiose	DLRVVLDZNNYCBX-ABXHMFFYSA-N	361	NA	0.189798	Primary
melezitose	QWIZNVHXZXRPDR-WSCXOGSTSA-N	361	NA	0.0445791	Primary
mannose	WQZGKKKJIJFFOK-QTVWNMPRSA-N	205	NA	1.2266	Primary
mannoheptulose	HSNZZMHEPUFJNZ-QMTIVRBISA-N	319	NA	0.123846	Primary
maltose	GUBGYTABKSRVRQ-PICCSMPSSA-N	361	NA	0.0476549	Primary
malic acid	BJEPYKJPYRNKOW-UHFFFAOYSA-N	233	NA	0.437867	Primary
maleimide	PEEHTFAAVSWFBL-UHFFFAOYSA-N	154	NA	0.0398843	Primary
maleic acid	VZCYOOQTPOCHFL-UPHRSURJSA-L	245	NA	0.00186239	Primary
lyxose	SRBFZHDQGSBBOR-AGQMPKSLSA-N	217	NA	0.504802	Primary
lyxitol	HEBKCHPVOIAQTA-IMJSIDKUSA-N	217	NA	0.104127	Primary
lysine	KDXKERNSBIXSRK-YFKPBYRVSA-N	317	NA	0.0537998	Primary
loganin	AMBQHHVBBHTQBF-UOUCRYGSSA-N	361	NA	0.0381525	Primary
linolenic acid	DTOSIQBPPRVQHS-PDBXOOCHSA-N	335	NA	0.0152268	Primary
linoleic acid	OYHQOLUKZRVURQ-HZJYTTRNSA-N	337	NA	0.188165	Primary
levoinositol	CDAISMWEOUEBRE-UHFFFAOYSA-N	432	NA	0.0273131	Primary
levoglucosan	TWNIBLMWSKIRAT-VFUOTHLCSA-N	204	NA	0.928633	Primary
leucine	ROHFNLRQFUQHCH-YFKPBYRVSA-N	86	NA	0.0872983	Primary
lauric acid	POULHZVOKOAJMA-UHFFFAOYSA-N	257	NA	0.0106146	Primary
lactose	GUBGYTABKSRVRQ-XLOQQCSPSA-N	191	NA	0.175417	Primary
lactic acid	JVTAAEKCZFNVCJ-UHFFFAOYSA-N	191	NA	0.0422221	Primary
isothreonic acid	JPIJQSOTBSSVTP-GBXIJSLDSA-N	147	NA	0.0632649	Primary
isomaltose	DLRVVLDZNNYCBX-RTPHMHGBSA-N	361	NA	0.0100818	Primary
isoleucine	AGPKZVBTJJNPAG-WHFBIAKZSA-N	158	NA	0.0542871	Primary
isochlorogenic acid	CWVRJTMFETXNAD-DUXPYHPUSA-N	307	NA	0.0160351	Primary
inositol-4-monophosphate	INAPMGSXUVUWAF-GFWFORPUSA-N	315	NA	0.00548972	Primary
hydroxylamine	AVXURJPOCDRRFD-UHFFFAOYSA-N	146	NA	0.0105851	Primary
hydroquinone	QIGBRXMKCJKVMJ-UHFFFAOYSA-N	239	NA	0.0754647	Primary
heneicosanoic acid	CKDDRHZIAZRDBW-UHFFFAOYSA-N	117	NA	0.0256423	Primary
glycyl tyrosine	XBGGUPMXALFZOT-VIFPVBQESA-N	174	NA	0.0815212	Primary
glycolic acid	AEMRFAOFKBGASW-UHFFFAOYSA-N	177	NA	0.0513211	Primary
glycine	DHMQDGOQFOQNFH-UHFFFAOYSA-N	248	NA	0.0124659	Primary
glycerol-alpha-phosphate	AWUCVROLDVIAJX-UHFFFAOYSA-N	357	NA	0.00475754	Primary
glycerol-3-galactoside	NHJUPBDCSOGIKX-NTXXKDEISA-N	204	NA	0.31311	Primary
glycerol	PEDCQBHIVMGVHV-UHFFFAOYSA-N	205	NA	0.905037	Primary
glyceric acid	RBNPOMFGQQGHHO-UHFFFAOYSA-N	189	NA	0.0434113	Primary
glutaric acid	JFCQEDHGNNZCLN-UHFFFAOYSA-N	261	NA	0.00240498	Primary
glutamic acid	WHUUTDBJXJRKMK-VKHMYHEASA-N	246	NA	0.00557777	Primary
glucuronic acid	AEMOLEFTQBMNLQ-AQKNRBDQSA-N	333	NA	0.0416828	Primary
glucose-1-phosphate	HXXFSFRBOHSIMQ-VFUOTHLCSA-N	217	NA	2.04573	Primary
glucose	WQZGKKKJIJFFOK-VFUOTHLCSA-N	319	NA	1.66351	Primary
gluconic acid lactone	PHOQVHQSTUBQQK-SQOUGZDYSA-N	220	NA	0.149439	Primary
gluconic acid	RGHNJXZEOKUKBD-QTBDOELSSA-N	333	NA	0.015651	Primary
glucoheptulose	HSNZZMHEPUFJNZ-SHUUEZRQSA-N	217	NA	0.0522683	Primary
galacturonic acid	AEMOLEFTQBMNLQ-DTEWXJGMSA-N	333	NA	0.0162108	Primary
galactose	WQZGKKKJIJFFOK-PHYPRBDBSA-N	319	NA	2.01169	Primary
galactonic acid	RGHNJXZEOKUKBD-MGCNEYSASA-N	292	NA	0.00724606	Primary
galactinol	VCWMRQDBPZKXKG-ZNVDUFQESA-N	204	NA	1.7063	Primary
fumaric acid	VZCYOOQTPOCHFL-OWOJBTEDSA-N	245	NA	0.035822	Primary
fucose	SHZGCJCMOBCMKK-FPRJBGLDSA-N	160	NA	0.257132	Primary
fructose	RFSUNEUAIZKAJO-ARQDHWQXSA-N	307	NA	2.59812	Primary
flavin adenine	IMGVNJNCCGXBHD-UYBVJOGSSA-O	246	NA	0.00644344	Primary
ferulic acid	KSEBMYQBYZTDHS-HWKANZROSA-N	338	NA	0.0163058	Primary
ethanolamine	HZAXFHJVJLSVMW-UHFFFAOYSA-N	174	NA	1.68013	Primary
erythronic acid lactone isomer	SGMJBNSHAZVGMC-PWNYCUMCSA-N	247	NA	0.0119332	Primary
erythritol	UNXHWFMMPAWVPI-ZXZARUISSA-N	217	NA	0.108792	Primary
dodecanol	LQZZUXJYWNFBMV-UHFFFAOYSA-N	243	NA	0.131418	Primary
D-erythro-sphingosine	WWUZIQQURGPMPG-KRWOKUGFSA-N	204	NA	0.0528293	Primary
deoxypentitol	FJGNTEKSQVNVTJ-UHFFFAOYSA-N	231	NA	0.0226776	Primary
dehydroascorbic acid	SBJKKFFYIZUCET-JLAZNSOCSA-N	173	NA	0.0214446	Primary
conduritol-beta-epoxide	ZHMWOVGZCINIHW-SPHYCDKFSA-N	318	NA	0.0442663	Primary
citric acid	KRKNYBCHXYNGOX-UHFFFAOYSA-N	273	NA	0.427882	Primary
cerotinic acid	XMHIUKTWLZUKEX-UHFFFAOYSA-N	145	NA	0.0154282	Primary
catechin	PFTAWBLQPZVEMU-DZGCQCFKSA-N	368	NA	2.21116	Primary
caproic acid	FUZZWVXGSFPDMH-UHFFFAOYSA-N	173	NA	0.0565848	Primary
capric acid	GHVNFZFCNZKVNT-UHFFFAOYSA-N	229	NA	0.00910723	Primary
butyrolactam	HNJBEVLQSNELDL-UHFFFAOYSA-N	142	NA	0.0487712	Primary
beta-sitosterol	KZJWDPNRJALLNS-VJSFXXLFSA-N	129	NA	0.91797	Primary
beta-gentiobiose	DLRVVLDZNNYCBX-LIZSDCNHSA-N	160	NA	0.503254	Primary
beta-alanine	UCMIRNVEIXFBKS-UHFFFAOYSA-N	248	NA	0.0325612	Primary
behenic acid	UKMSUNONTOPOIO-UHFFFAOYSA-N	117	NA	0.0500828	Primary
azelaic acid	BDJRBEYXGGNYIS-UHFFFAOYSA-N	317	NA	0.00498482	Primary
ascorbic acid	CIWBSHSKHKDKBQ-JLAZNSOCSA-N	332	NA	0.0531094	Primary
arbutin	BJRNKVDFDLYUGJ-RMPHRYRLSA-N	254	NA	0.245937	Primary
arabitol	HEBKCHPVOIAQTA-QWWZWVQMSA-N	103	NA	0.115531	Primary
alpha-ketoglutarate	KPGXRSRHYNQIFN-UHFFFAOYSA-N	198	NA	0.00463551	Primary
alanine	QNAYBMKLOCPYGJ-REOHCLBHSA-N	116	NA	0.0763803	Primary
adipic acid	WNLRTRBMVRJNCN-UHFFFAOYSA-N	111	NA	0.0120282	Primary
adenosine	OIRDTQYFTABQOQ-KQYNXXCUSA-N	236	NA	0.0085757	Primary
aconitic acid	GTZCVFVGUGFEME-IWQZZHSRSA-N	229	NA	0.00596597	Primary
6-deoxyglucose	PNNNRSAQSRJVSB-JGWLITMVSA-N	117	NA	0.230926	Primary
6-deoxyglucitol	SKCKOFZKJLZSFA-JGWLITMVSA-N	117	NA	0.0775433	Primary
5-methoxytryptamine	JTEJPPKMYBDEMY-UHFFFAOYSA-N	174	NA	0.385848	Primary
5-Hydroxymethyl-2-furancarboxaldehyde	NOEGNKMFWQHSLB-UHFFFAOYSA-N	138	NA	0.800339	Primary
4-hydroxybenzoic acid	FJKROLUGYXJWQN-UHFFFAOYSA-N	267	NA	0.122464	Primary
4-aminobutyric acid	BTCSSZJGUNDROE-UHFFFAOYSA-N	304	NA	0.124927	Primary
3-hydroxybutyric acid	WHBMMWSBFZVSSR-GSVOUGTGSA-N	191	NA	0.0102235	Primary
3,6-anhydro-D-glucose	WZYRMLAWNVOIEX-SLPGGIOYSA-N	231	NA	0.0174655	Primary
3,6-anhydro-D-galactose	WZYRMLAWNVOIEX-BGPJRJDNSA-N	231	NA	0.0235965	Primary
3,4-dihydroxyphenylacetic acid	CFFZDZCDUFSOFZ-UHFFFAOYSA-N	179	NA	0.0948503	Primary
3,4-dihydroxycinnamic acid	QAIPRVGONGVQAS-DUXPYHPUSA-N	219	NA	0.0567035	Primary
3,4-dihydroxybenzoic acid	YQUVCSBJEUQKSH-UHFFFAOYSA-N	193	NA	0.64745	Primary
2-monoolein	UPWGQKDVAURUGE-KTKRTIGZSA-N	129	NA	0.121279	Primary
2-ketoadipic acid	FGSBNBBHOZHUBO-UHFFFAOYSA-N	100	NA	0.021841	Primary
2-deoxyuridine	MXHRCPNRJAMMIM-SHYZEUOFSA-N	155	NA	0.006407	Primary
2,3-dihydroxypyridine	GGOZGYRTNQBSSA-UHFFFAOYSA-N	240	NA	0.0123869	Primary
1-monopalmitin	QHZLMUACJMDIAE-UHFFFAOYSA-N	371	NA	0.0291259	Primary
1-monoolein	RZRNAYUHWVFMIP-KTKRTIGZSA-N	129	NA	0.156998	Primary
1,2-anhydro-myo-inositol	ZHMWOVGZCINIHW-FTYOSCRSSA-N	318	NA	0.197855	Primary
530733	NA	212	NA	0.00739798	Primary
530130	NA	375	NA	0.268266	Primary
530129	NA	487	NA	0.946528	Primary
530107	NA	165	NA	0.1021	Primary
530106	NA	182	NA	0.0518801	Primary
530105	NA	160	NA	0.252479	Primary
530104	NA	456	NA	0.0678562	Primary
530103	NA	93	NA	0.639718	Primary
530102	NA	395	NA	0.049229	Primary
530099	NA	297	NA	0.0291603	Primary
530098	NA	222	NA	0.116368	Primary
530096	NA	369	NA	0.0982581	Primary
530095	NA	103	NA	0.992117	Primary
530094	NA	382	NA	0.0676269	Primary
530093	NA	165	NA	0.334102	Primary
530092	NA	90	NA	0.460266	Primary
530091	NA	179	NA	0.31763	Primary
530090	NA	165	NA	0.677192	Primary
530088	NA	179	NA	0.766077	Primary
530087	NA	166	NA	0.627974	Primary
530086	NA	178	NA	0.794344	Primary
530085	NA	178	NA	0.82817	Primary
530084	NA	262	NA	0.319491	Primary
530082	NA	90	NA	2.69557	Primary
530081	NA	320	NA	0.669968	Primary
530071	NA	85	NA	0.0372381	Primary
530070	NA	85	NA	0.042048	Primary
530002	NA	85	NA	0.0634123	Primary
529604	NA	158	NA	0.00502331	Primary
525988	NA	237	NA	0.00488408	Primary
523965	NA	344	NA	0.0142771	Primary
523950	NA	331	NA	0.0225244	Primary
523785	NA	231	NA	0.0051523	Primary
520569	NA	215	NA	0.00792501	Primary
517911	NA	361	NA	0.441824	Primary
517211	NA	368	NA	0.74673	Primary
517210	NA	368	NA	0.783689	Primary
516964	NA	300	NA	0.0387106	Primary
513551	NA	319	NA	0.0063292	Primary
509528	NA	318	NA	0.24166	Primary
505754	NA	361	NA	0.0446991	Primary
486463	NA	361	NA	0.00729356	Primary
